# Supplementary material for: Identification of hypoxia- and mitochondria-related genes associated with recurrent spontaneous abortion: an integrative bioinformatics analysis and preliminary validation
Source: PeerJ journal article supplement (doi:10.7717/peerj.20467), 2025-12-19
Supplement: RawData1.xlsx [file RawData1.xlsx]

## Sheet: Sheet1
Plate 1
	1	2	3	4	5	6	7	8	9	10	11
A	24.905	25.0817	25.0726	24.6604	24.6985	24.4311	24.8319	24.8854	24.6651	26.32	26.2877
B
C	17.0834	16.7699	16.9829	20.4637	20.2792	20.2765	21.4835	21.4176	21.5268	17.0673	17.0568
D	26.9871	26.828	26.7353	26.3987	26.5533	27.6302	23.4453	23.306	23.3481	26.0265	26.1221
E
F	29.0748	28.4545	28.7679	28.2326	28.5981	28.4707	24.5646	24.5473	24.4842	14.644	14.8943
G	24.9145	25.037	24.5767				25.7945	25.9841	25.8416
H	26.2597	26.2857	26.1805				18.1546	18.0857	18.2052
Plate 2
	1	2	3	4	5	6	7	8	9	10	11
A	25.758	25.8142	25.8992	25.4961	25.5574	25.4529	26.0906	25.7855	25.864	27.0239	26.9438
B	15.873	16.001	16.074	20.3529	20.4044	20.2703	21.0006	21.0332	20.7427	15.298	15.1465
C	27.9474	28.0432	28.142	29.2511	28.8058	29.0294	25.0171	25.2261	25.2142	24.9411	24.9837
D	28.4387	28.7304	28.6538	26.6074	26.6308	26.6516	17.5009	17.5244	17.294	13.7404	13.9126
E	26.1315	26.2032	26.2201	25.4444	25.3499	25.8416
F	21.7283	21.9496	21.863	16.7783	16.6717	16.6216
