# Supplementary material for: Identification of hypoxia- and mitochondria-related genes associated with recurrent spontaneous abortion: an integrative bioinformatics analysis and preliminary validation
Source: PeerJ journal article supplement (doi:10.7717/peerj.20467), 2025-12-19
Supplement: RawData2.xlsx [file RawData2.xlsx]

## Sheet: Sheet1
Samples	BSG			TRAK1				H-GAPDH1				Average Ct of H-GAPDH1		H-GAPDH2				Average Ct of H-GAPDH1
Control	24.905	25.0817	25.0726	25.758	25.8142	25.8992		17.0834	16.7699	16.9829		16.9454		15.873	16.001	16.074		15.9827
Control	24.6604	24.6985	24.4311	25.4961	25.5574	25.4529		20.4637	20.2792	20.2765		20.3398		20.3529	20.4044	20.2703		20.3425
Control	24.8319	24.8854	24.6651	26.0906	25.7855	25.864		21.4835	21.4176	21.5268		21.476		21.0006	21.0332	20.7427		20.9255
Control	26.32	26.2877	26.1214	27.0239	26.9438	27.058		17.0673	17.0568	17.0909		17.0717		15.298	15.1465	15.4737		15.306
Control	26.9871	26.828	26.7353	27.9474	28.0432	28.142		29.0748	28.4545	28.7679		28.7657		28.4387	28.7304	28.6538		28.6076
RPL	26.3987	26.5533	27.6302	29.2511	28.8058	29.0294		28.2326	28.5981	28.4707		28.4338		26.6074	26.6308	26.6516		26.6299
RPL	23.4453	23.306	23.3481	25.0171	25.2261	25.2142		24.5646	24.5473	24.4842		24.532		17.5009	17.5244	17.294		17.4397
RPL	26.0265	26.1221	25.8977	24.9411	24.9837	25.09		14.644	14.8943	14.9221		14.8201		13.7404	13.9126	13.7415		13.7981
RPL	24.9145	25.037	24.5767	26.1315	26.2032	26.2201		25.7945	25.9841	25.8416		25.8734		21.7283	21.9496	21.863		21.8469
RPL	26.2597	26.2857	26.1805	25.4444	25.3499	25.8416		18.1546	18.0857	18.2052		18.1485		16.7783	16.6717	16.6216		16.6905
	ΔCt = Ct of target gene − Mean Ct of reference gene
Control	7.95965	8.13637	8.12727	9.77529	9.83153	9.91649
Control	4.32058	4.35877	4.09128	5.15351	5.21482	5.11039
Control	3.35589	3.40948	3.18914	5.16508	4.85994	4.93845
Control	9.24839	9.21604	9.04971	11.7179	11.6378	11.752
Control
RPL	-2.03507	-1.88055	-0.803568	2.62114	2.17591	2.39947
RPL	-1.0867	-1.226	-1.1839	7.57737	7.78636	7.77448
RPL	11.2063	11.302	11.0775	11.143	11.1855	11.2918
RPL	-0.958895	-0.836392	-1.29672	4.28455	4.35625	4.37317
RPL	8.11121	8.13721	8.03204	8.75387	8.65936	9.15103
	Mean ΔCt of the control group
Control1	6.20521	6.20521	6.20521	7.92276	7.92276	7.92276
Control2	6.20521	6.20521	6.20521	7.92276	7.92276	7.92276
Control3	6.20521	6.20521	6.20521	7.92276	7.92276	7.92276
Control4	6.20521	6.20521	6.20521	7.92276	7.92276	7.92276
Control5	6.20521	6.20521	6.20521	7.92276	7.92276	7.92276
Control1	6.20521	6.20521	6.20521	7.92276	7.92276	7.92276
Control2	6.20521	6.20521	6.20521	7.92276	7.92276	7.92276
Control3	6.20521	6.20521	6.20521	7.92276	7.92276	7.92276
Control4	6.20521	6.20521	6.20521	7.92276	7.92276	7.92276
Control5	6.20521	6.20521	6.20521	7.92276	7.92276	7.92276
	ΔΔCt = ΔCt of the experimental group − Mean ΔCt of the control group
Control	1.75443	1.93115	1.92205	1.85253	1.90877	1.99372
Control	-1.88464	-1.84645	-2.11393	-2.76925	-2.70794	-2.81237
Control	-2.84932	-2.79574	-3.01607	-2.75769	-3.06282	-2.98431
Control	3.04318	3.01083	2.8445	3.79512	3.71502	3.82922
Control	-6.20521	-6.20521	-6.20521	-7.92276	-7.92276	-7.92276
RSA	-8.24029	-8.08576	-7.00878	-5.30162	-5.74685	-5.5233
RSA	-7.29192	-7.43122	-7.38912	-0.345388	-0.136405	-0.148277
RSA	5.00113	5.09677	4.87231	3.22023	3.26278	3.36906
RSA	-7.16411	-7.04161	-7.50194	-3.63822	-3.56652	-3.5496
RSA	1.906	1.932	1.82682	0.831108	0.736603	1.22827
	2^-∆∆CT
Control	0.29639	0.26222	0.263879	0.276907	0.266319	0.25109
Control	3.6926	3.59613	4.32869	6.81753	6.53389	7.02436
Control	7.20662	6.94385	8.08963	6.7631	8.35607	7.91346
Control	0.121314	0.124065	0.139226	0.072037	0.0761498	0.0703541
Control	73.7829	73.7829	73.7829
RSA	302.394	271.68	128.782	39.4409	53.7002	45.9915
RSA	156.706	172.591	167.628	1.27049	1.09916	1.10824
RSA	0.0312255	0.0292226	0.034142	0.107304	0.104185	0.0967856
RSA	143.421	131.745	181.263	12.4512	11.8475	11.7094
RSA	0.266831	0.262066	0.281885	0.562097	0.600151	0.426828
	2^-∆∆CT Avg
	BSG			TRAK1
	Control	RSA		Control	RSA
1	0.0938254	13.7055		0.0715257	12.5285
2	1.32526	9.68992		1.83478	0.313174
3	2.53704			2.07402	0.0277592
4	0.0438739	8.90025		0.0196789	3.24242
5		0.0158101			0.143091
Avg	1	8.07787		1	3.25098
SD	1.18373	5.77184		1.10657	5.35609
	±	±		±	±
	1±1.1837	8.0779±5.7718		1±1.1066	3.2510±5.3561
		Control	RSA	p值
	BSG	1±1.2503	16.6202±19.9489	0.001
	TRAK1	1±1.1066	3.2510±5.3561	0.4415
