# Supplementary material for: Identification of hypoxia- and mitochondria-related genes associated with recurrent spontaneous abortion: an integrative bioinformatics analysis and preliminary validation
Source: PeerJ journal article supplement (doi:10.7717/peerj.20467), 2025-12-19
Supplement: RawData3.xlsx [file RawData3.xlsx]

## Sheet: Sheet1
Serial Number	Group	Sample ID	Sample Information	Remarks	Target Gene
1	Control	Control1	ZCTM1	Sample mismatch	BSG
2	Control	Control2	ZCTM2		TRAK1
3	Control	Control3	ZCTM3
4	Control	Control4	ZCTM4
5	Control	Control5	ZCTM5
6	RSA	RSA1	LCTM1
7	RSA	RSA2	LCTM2
8	RSA	RSA3	LCTM3
9	RSA	RSA4	LCTM4
10	RSA	RSA5	LCTM6
Plate 1
	1	2	3	4	5	6	7	8	9	10	11	12
A	BSG+ 1	BSG+ 1	BSG+ 1	BSG+ 2	BSG+ 2	BSG+ 2	BSG+ 3	BSG+ 3	BSG+ 3	BSG+ 4	BSG+ 4	BSG+ 4
B
C	GAPDH + 1	GAPDH + 1	GAPDH + 1	GAPDH + 2	GAPDH + 2	GAPDH + 2	GAPDH + 3	GAPDH + 3	GAPDH + 3	GAPDH + 4	GAPDH + 4	GAPDH + 4
D	BSG+ 5	BSG+ 5	BSG+ 5	BSG+ 6	BSG+ 6	BSG+ 6	BSG+ 7	BSG+ 7	BSG+ 7	BSG+ 8	BSG+ 8	BSG+ 8
E
F	GAPDH + 5	GAPDH + 5	GAPDH + 5	GAPDH + 6	GAPDH + 6	GAPDH + 6	GAPDH + 7	GAPDH + 7	GAPDH + 7	GAPDH + 8	GAPDH + 8	GAPDH + 8
G	BSG+ 9	BSG+ 9	BSG+ 9				GAPDH + 9	GAPDH + 9	GAPDH + 9
H	BSG+ 10	BSG+ 10	BSG+ 10				GAPDH + 10	GAPDH + 10	GAPDH + 10
Plate 2
	1	2	3	4	5	6	7	8	9	10	11	12
A	TRAK1 + 1	TRAK1 + 1	TRAK1 + 1	TRAK1 + 2	TRAK1 + 2	TRAK1 + 2	TRAK1 + 3	TRAK1 + 3	TRAK1 + 3	TRAK1 + 4	TRAK1 + 4	TRAK1 + 4
B	GAPDH + 1	GAPDH + 1	GAPDH + 1	GAPDH + 2	GAPDH + 2	GAPDH + 2	GAPDH + 3	GAPDH + 3	GAPDH + 3	GAPDH + 4	GAPDH + 4	GAPDH + 4
C	TRAK1 + 5	TRAK1 + 5	TRAK1 + 5	TRAK1 + 6	TRAK1 + 6	TRAK1 + 6	TRAK1 + 7	TRAK1 + 7	TRAK1 + 7	TRAK1 + 8	TRAK1 + 8	TRAK1 + 8
D	GAPDH + 5	GAPDH + 5	GAPDH + 5	GAPDH + 6	GAPDH + 6	GAPDH + 6	GAPDH + 7	GAPDH + 7	GAPDH + 7	GAPDH + 8	GAPDH + 8	GAPDH + 8
E	TRAK1 + 9	TRAK1 + 9	TRAK1 + 9	TRAK1 + 10	TRAK1 + 10	TRAK1 + 10
F	GAPDH + 9	GAPDH + 9	GAPDH + 9	GAPDH + 10	GAPDH + 10	GAPDH + 10
G
H
