# Supplementary material for: Identification of hypoxia- and mitochondria-related genes associated with recurrent spontaneous abortion: an integrative bioinformatics analysis and preliminary validation
Source: PeerJ journal article supplement (doi:10.7717/peerj.20467), 2025-12-19
Supplement: Supplementary_Table_1.xlsx [file Supplementary_Table_1.xlsx]

## Sheet: Supplementary Table 1
Supplementary Table 1 ranked gene list for TRAK1-based GSEA
	x
XDH	5.69021
CYP26A1	5.11288
TM4SF4	4.80467801608333
CAPN6	4.79222496366667
LRRC26	4.6819
OPRK1	4.66143731333334
PKHD1L1	4.50798613966667
TRPM6	4.49637213058334
HLA-DOB	4.49353
PLA2G4D	4.36365322733334
PEBP4	4.11209
DUOX1	4.08203575791667
DUOXA1	4.01726789383334
DLG2	4.00483992958334
SLC7A4	3.98791267566667
ABCA12	3.74421
CTNNA2	3.61054586116667
SLC15A2	3.60093189516667
STEAP4	3.58017
NLRP5	3.57764759033333
PLA2G4F	3.48539
CALB2	3.47833675583333
SPINT3	3.42857
ENPP3	3.40082177716667
GP2	3.38256
ADAMTS8	3.37418
SLC25A48	3.37308
CHST4	3.34666
UPK1B	3.30071
MMP26	3.2861
BIRC3	3.21070412641667
CLDN24	3.19321069566667
FETUB	3.18298139683333
PRR15L	3.16506397483334
ZBED2	3.05592675391667
KCNK13	3.04778
GREM2	3.0209
PNMT	3.00745
TFPI2	2.99455
PDE6A	2.97573
SLC24A4	2.95280287166667
CAMP	2.95033022958333
MAP2K6	2.92466626641667
NPR3	2.894
KREMEN2	2.87922614533333
ANK3	2.85953
KCNG1	2.85003
SPINK13	2.83645893441667
SLAIN1	2.83437132633334
SLC16A6	2.83433085016667
GJB2	2.81186039466667
SHISA8	2.80078
ATP6V0E2	2.77794943166667
ALPL	2.75811798458334
HSD17B2	2.75505601391667
SOX7	2.74421653908333
ATP12A	2.73989022108333
WNK4	2.73198910941667
FOLR1	2.73178
SLC7A1	2.71981719666667
CBR3	2.71407
LRRC1	2.68364
LRP4	2.67613667658334
TFCP2L1	2.67154061608333
FXYD4	2.66240565266667
CD36	2.63536
SERPINA5	2.63294763666667
SULT2B1	2.63075718658333
SERPINB9	2.62923
PLD6	2.61171775641667
NR4A2	2.60672679216667
SLC30A2	2.59862868991667
CLDN22	2.59742915991667
IDH1	2.59568
SCGB1D4	2.59091157941667
SULT1E1	2.54122
ADARB2	2.53240468966667
ALDH3B2	2.52714
TMEM144	2.50766
GLYATL3	2.50698495291667
GMPR	2.47914464016667
ZNF750	2.47625283791667
CYP2J2	2.47034873158334
HGD	2.47030071583334
TMED6	2.46591422741667
OFD1	2.46379
SNTG2	2.44959194183333
ZG16B	2.43919820066667
PPP1R1B	2.43416
ST3GAL6	2.43275
PCSK6	2.42793
CSRP2	2.42095647166667
GRP	2.40634383058334
CREB3L1	2.39681575083334
TTC21A	2.35105101058334
ENTPD8	2.34682957158334
PTGS2	2.34529
CDH16	2.33032105308333
DEFB104B	2.32797362758334
SLC5A12	2.32297
TNNC1	2.30588067216667
RNF183	2.30049
SLC39A14	2.29629423416667
POU5F1	2.29594196083334
ABCG1	2.29438930583333
PPM1H	2.28904
GJB6	2.28196102691667
KCNJ2	2.26724522341667
BANK1	2.26045400783334
LCN12	2.25557309016667
ERN2	2.2549
MFSD6	2.24970903408334
KRT8	2.23281800416667
SERPINA4	2.20898
IKZF2	2.20171478358334
FMO5	2.20144
SQLE	2.19955364666667
KHDRBS3	2.19788271783334
RASSF4	2.19705
OCA2	2.19219
HSD11B2	2.18855
RANBP17	2.17650933991667
OVOL1	2.16185622608333
ELP3	2.14979
MPPED2	2.14920260866667
PHACTR3	2.13974
CES4A	2.13852828908334
STX19	2.13621
MCOLN2	2.13132
SLC26A7	2.13085916208333
HMGCS2	2.11002981433334
ANGPT1	2.10795193816667
SYBU	2.10247
FRAS1	2.09751
MUC15	2.09347
SYT2	2.08179010933334
FSTL3	2.08149
TMEM61	2.08065138216667
EAF2	2.07865307683334
NRK	2.07838205941667
SLC16A1	2.07034
OR7A5	2.06353
PAX2	2.06005954916667
HPGD	2.05737
BCKDHB	2.05182
RABGAP1L	2.04469438883334
RASGEF1B	2.04326731641667
MFSD6L	2.02836391208334
HSD11B1	2.02625261866667
CKB	2.02488
SERHL2	2.0241
FKBP5	2.01605528183334
TAP2	2.01527743916666
LONRF3	2.01508182616667
EPHB3	2.01074
PRKX	2.00294583091667
NDRG2	1.99098
FAM107A	1.98373
SCGB1D2	1.98195129333333
BARD1	1.98121
ADAM21	1.975
RXFP1	1.96833
ATP2B2	1.96414087733334
PTH2R	1.96294999016667
SLC26A3	1.96155431933333
CHRNA6	1.95794797841667
SLC4A7	1.95571001066667
RGS9BP	1.95234819508334
FOLR3	1.94296
NEBL	1.93899860241667
AP1S3	1.93519045558334
ST6GALNAC1	1.92651284333334
CKMT2	1.91915212391667
IL13RA2	1.90923
LRP1B	1.90893
CST1	1.89888
FAM110C	1.89735
FAM124B	1.89597045958333
SORD	1.89184771166667
PIP5K1B	1.88841
PI15	1.88340764833334
MPZL2	1.87132800416667
DUOX2	1.85946
NFIB	1.85816055666667
SLC46A2	1.85363807058333
RNF125	1.85289344991667
MUC1	1.85279292266667
ITGB8	1.85263941916667
AGMAT	1.84945044341667
GNG11	1.84904502916667
CYB5A	1.84827
HOMER2	1.84563
TTYH2	1.84356
RAB27B	1.84047361483333
NTRK3	1.8298
DENND2C	1.82091479683334
SPDEF	1.82016
CWH43	1.81052
HEY1	1.80696348108334
SCUBE1	1.80687854591667
ANKRD35	1.80535231416667
STXBP6	1.80315771033333
SLC37A2	1.7993
PLD5	1.79805921233334
NUP153	1.77852613333334
SLC26A4	1.77568179583334
COBL	1.77271115741667
PEA15	1.77195
TDRD9	1.76838511741667
ACTG2	1.76575814808334
DHRS7	1.76482494833333
ENTPD3	1.76163165058333
PXMP4	1.76159
VEPH1	1.76057064433334
TXNDC16	1.75888498783334
EMILIN3	1.75826917716667
SLC9A2	1.75677
PPARG	1.75414274933333
ECI2	1.75110687833334
TSC22D3	1.74973143666667
SNX30	1.74796267583334
PITPNM3	1.74267
GAL	1.73829
A2ML1	1.73432
PLCH1	1.73059845141667
TLR5	1.72915406041667
ABCB9	1.72905938766667
SGCD	1.72855099616667
TCEA3	1.72191956416667
MERTK	1.72072916858333
SIDT1	1.71898943433334
KYNU	1.71667425533333
ACP6	1.71005670141667
TPD52L1	1.70541
SLITRK5	1.70489517983334
PLXNA4	1.69576864083333
ZNF589	1.68964
UCK2	1.67628951800001
MOGAT1	1.67476
USP53	1.66934474166667
PLLP	1.66917
PIWIL2	1.66711690216667
CA13	1.66273
AK4	1.66065137916667
CBLC	1.65427
FZD5	1.65369
SLC3A1	1.65359
EML5	1.65272780183333
ZSWIM4	1.64913638058334
ASRGL1	1.64883338166667
SLC43A1	1.64850301541667
TSC2	1.64645640016667
PSCA	1.64589091816667
SUFU	1.64457963258334
CTNND2	1.64292
ERBB4	1.63926914516667
PDK4	1.63809880366667
ZNF880	1.63777568758334
RND2	1.63411
SORBS2	1.62994579491667
SFTA2	1.62717651183334
PRKAG2	1.62365645416667
NUDT16	1.62365
TPD52	1.62299664516667
GRHL1	1.61771449783333
ERVMER34-1	1.61461047141667
IL20RA	1.61449800483334
LNX1	1.60416
POC1B	1.60054754866667
RAB15	1.60037326083334
DDIT4	1.59699071416667
VGLL1	1.59487306508333
GLYATL2	1.59464449733334
KCNJ18	1.59076
RAD54B	1.58933921358333
LEFTY1	1.58681881583334
EDA	1.58314950008334
RYR3	1.58303190816667
IYD	1.58210641641667
PKP2	1.58173058375001
BVES	1.5813
FGL1	1.57625410333334
PLCB1	1.57623
BAIAP2L2	1.57555443558334
IGSF9	1.57441746341667
TRH	1.57213328683334
NQO1	1.56925329633334
CSRNP1	1.56770903233334
PHF8	1.56707958308334
CERKL	1.56488
ROS1	1.56359800833333
DLG5	1.55567061541667
SHMT1	1.55425656308334
ARSF	1.54843
FAM120B	1.54597
FAM169A	1.54160606508334
HS6ST3	1.54133282616667
CABYR	1.54089892033334
TM4SF1	1.53970040583333
SLC39A2	1.53930799158334
SPAG11B	1.53923115733333
PSAT1	1.53747777083333
CST2	1.53618068466667
CLNK	1.53564
LRRC17	1.53081872158334
TM7SF2	1.52804271391667
POPDC3	1.52716723308334
PHGDH	1.52463097458334
PLA2G4A	1.51775
CILP	1.51710757916667
HPCAL4	1.51689378433333
GPX2	1.51605003341667
SGPP2	1.51594526908334
HPRT1	1.51574055083334
EYA1	1.51457
SCGB1D1	1.51448
CHODL	1.51288235066667
CTH	1.51281
KCNJ12	1.51168
OCIAD2	1.50837079333334
PDZD2	1.50685409233333
GNMT	1.50529334383334
PIR	1.50154797583333
DCXR	1.4998
CPNE4	1.49708
PDE9A	1.49497331641667
ACSM3	1.49464252241667
CCDC146	1.49177029433333
PPL	1.49162
ATP1A4	1.49102588583333
SPINK8	1.48962684916667
SOX17	1.48430987833334
RASSF10	1.48364
PROM2	1.48345
CDS1	1.48281
MAP2	1.48231
AHCYL2	1.47697
ATP7B	1.47073
PFKFB4	1.46698110441667
ZNF652	1.45994654666667
CYB5R2	1.45867149333334
KRT83	1.44897107741667
EPN3	1.44845505500001
PPP1R1A	1.44811968116667
SLITRK6	1.44579323333334
PLCL1	1.44419
PTGS1	1.44337421200001
SH3YL1	1.44053887583334
ATP10A	1.43921977533334
PGAM2	1.43694007658334
TM7SF3	1.43678423083334
NOD2	1.43619973308334
FAM13A	1.43530130008334
ATP1B1	1.43406883916667
AZGP1	1.42857
CPT1A	1.42541609708334
DGKD	1.42483524833334
KLHL31	1.42375553791667
NFIA	1.42330088166667
PLCXD3	1.42077
GSN	1.42061963916667
TEKT4	1.41713
CDC14A	1.41285
FREM2	1.40612770583333
USP9X	1.40540657608333
SAMD13	1.40428620733333
FN1	1.40423801158334
MORC4	1.39471346491667
LRRC52	1.38936
FRK	1.38778766866667
ADK	1.38554
DYNC1I1	1.38541420916667
COL6A6	1.38292493441667
DNAJB13	1.37892909641667
CA2	1.37661995541667
ABCA5	1.37460452141667
SH3RF2	1.37199
KCNMB2	1.36987016241667
L3MBTL4	1.36927446908333
IL1RN	1.36924824041667
PAQR4	1.36833
ADAMTS18	1.36611339016667
ARHGAP15	1.36319
TTC21B	1.36215216808333
TMEM132C	1.36164496041667
ATP1A1	1.36144166833333
PER1	1.36140901633334
TMEM141	1.35779
MRPL3	1.35641
TMEM154	1.35469
PTPRJ	1.35466839816666
ACSL3	1.35153418341667
TNNT1	1.3511
NT5DC3	1.35096701566667
THEM4	1.35077
KAZALD1	1.35068550716667
IGSF11	1.34713
UNC5B	1.34536730833334
ARSG	1.34349125266667
TMEM196	1.34209588441667
CNDP2	1.33888353666667
OR9G1	1.33357
SPAG4	1.33015931383333
BAG5	1.32872144750001
PCDH7	1.32810842208334
PLA2G10	1.32738
TP53I3	1.32624
CREG1	1.32616
PAQR5	1.32551786541667
GPT2	1.32486
RAB26	1.32394247508333
RAMP2	1.32324925508333
AARS2	1.32311
PCDH1	1.32297196416667
NIPAL1	1.32213
ACSL4	1.32187758866667
PTK6	1.32168926991667
ATP6V0A4	1.32106434858333
CCDC85C	1.31914776033334
NRXN3	1.31572
STBD1	1.31516901033334
MSX1	1.31363061166667
TMED3	1.31176076833334
RASAL1	1.31062
CNST	1.30926629441667
PRKCQ	1.30853
MYZAP	1.30825
SERPIND1	1.30701651041667
UGT8	1.30665312691667
LNX2	1.30301688091667
ELN	1.30191
GAD1	1.29993
ALDH6A1	1.29905662083333
EPB41L4B	1.29631387808334
GHSR	1.29558
SLCO3A1	1.29523203383333
STK39	1.29473
OXCT1	1.29297
ANXA3	1.29253815416667
CA4	1.29239468783334
DKK2	1.29197
TLE6	1.29057976741667
GRHL2	1.28925
NAV2	1.28625116583334
SMAD9	1.28574468566667
OOEP	1.28478510516667
NAAA	1.28312828416667
DUOXA2	1.27894
LPCAT3	1.27528
ALDH1A3	1.27301329316667
SPHK1	1.27062351583334
CITED4	1.26924
BDH1	1.26834881633334
AIFM3	1.26698
TSPAN13	1.26682139066667
SEC14L1	1.26463760583334
SEMA3G	1.26242697758334
ATG16L1	1.26212960916667
FGD4	1.25887206508333
DAPK2	1.25778776316667
LHFPL3	1.25657
HERPUD1	1.25300030416667
ZNF226	1.25259126166666
CEP70	1.25143308233334
KAT2B	1.25108771708334
SLC8A2	1.24895200058333
PPP4R2	1.24758800733334
CTAGE1	1.24487
FRAT2	1.24287
BTG3	1.24201178083333
POU2AF1	1.24183397408333
MYRIP	1.24089293083333
SLC25A29	1.23664492500001
OAZ3	1.23619
NEK6	1.23583
ENTPD2	1.23556764391667
HK2	1.23397008008333
TRAK1	1.23278
FSD1L	1.23266
MATN2	1.22717
ANAPC4	1.22584
CDC14B	1.22465394583333
TNFSF11	1.22404538808334
PCTP	1.22195265166667
OR13A1	1.22028
CLIC3	1.21888814683333
RMI1	1.21765
GGCT	1.21685393083333
GDPD3	1.21478
PTGER1	1.21045660408333
TLCD1	1.20991377908333
SOX6	1.20774144033334
PFKFB2	1.20550251583334
VPS37B	1.20368972333334
STAC	1.19837
TSTD1	1.19653778916667
XK	1.19614068283334
MFSD3	1.19559555383333
ZBTB16	1.19431385616667
DMRTA1	1.19303611666667
ARL4D	1.19247454041667
DGKB	1.19089262833333
SLC5A9	1.18589989833333
PCCA	1.18542763083334
KBTBD3	1.18396938358333
HEXIM2	1.18390470916667
AMOT	1.18216
WWC1	1.17967724083334
ATAD2	1.17857974891667
STXBP2	1.17761721166667
SLC39A8	1.17734
CPEB2	1.17679285183334
MAGED1	1.17352
KRT18	1.17186734083334
SAT1	1.17095936583334
ARTN	1.17034
GLIS3	1.17012
HOOK1	1.16966256333334
TLE1	1.16937198333334
SIAH3	1.16901361358334
PIK3C2G	1.16846217208333
SLC16A8	1.16814
KRTCAP3	1.16405
NDOR1	1.16103820833334
NRCAM	1.16104
HLA-DMB	1.16044867833334
TMEM101	1.15609
XG	1.15193
APOL4	1.15159484791667
ACSL5	1.14835499666667
GOLPH3	1.14825283333333
WFDC2	1.14615543916667
MYO1D	1.14203365458334
KRT31	1.13719628566667
RAC3	1.13531859416667
ATP13A4	1.13396670966667
BTAF1	1.13144
UNC5A	1.13134
RHBDL2	1.12736042358334
MAB21L3	1.12442267433333
EPHA7	1.12359
RNASET2	1.12121757166667
ANO10	1.11939
KLHL35	1.11912252833333
VLDLR	1.11801914991667
SPATA5L1	1.11762
DMD	1.11747
SERPINB5	1.11467959833334
TSHZ2	1.11313
EXD3	1.1127
PDZD8	1.11058701666667
NME4	1.10997
SECISBP2L	1.10856795833333
HS6ST1	1.10753
TIMP4	1.10697720716667
KCNB1	1.10643660441667
NLK	1.10635
ERMN	1.10408962591667
CFTR	1.10397
SHISA6	1.10378
HMGN5	1.10374343908334
CNGA1	1.10276153891667
TAP1	1.10211552583333
AADAT	1.10193150183333
RNF208	1.10167
MPHOSPH10	1.10143564083334
CYP4X1	1.10004038408333
LPAR2	1.09721716816667
DNASE2B	1.09678
CMYA5	1.0967
ECHS1	1.09590058416667
RRAGD	1.09558
LLGL2	1.09485605833334
NANOS3	1.09105885516667
HADHB	1.09093
SLC25A38	1.08906084483334
MICB	1.08898
MAP7	1.08619368233334
ACOX3	1.08476687983334
BST1	1.08453576033334
FAM13C	1.08446815508334
ARRDC1	1.08371664608334
DLX6	1.08163256750001
AK7	1.07761508991667
RHOBTB3	1.07615
HES5	1.07613546358334
TPPP	1.07611895466667
IFNGR1	1.07576625083334
ASPG	1.07535038233333
NBEAL2	1.07367
PIKFYVE	1.07176922008334
ATP6V1G1	1.07086322416667
C3orf80	1.0693
KIF25	1.06586044016667
RETSAT	1.06549
RAB25	1.06304
MME	1.06222
SLC25A10	1.06160209166667
TMCC1	1.06079744558333
CBLN2	1.05937
GLDC	1.05893
ADAL	1.05688439808333
BAIAP2	1.05583
SNX9	1.05346947591667
BSCL2	1.05332
PPFIA3	1.05325
TTC8	1.05203618658333
TRPM4	1.04993160783333
TMEM213	1.04908075191667
GYS1	1.04899
CEACAM1	1.04701592833334
SUDS3	1.04401316808334
SORT1	1.043
CLDN8	1.04283480383333
B4GALT4	1.04138115800001
MBP	1.04061466916667
MYOM1	1.0404
HOXB4	1.04035163608334
MT1G	1.03916249133334
SH3BGRL2	1.03901
TLR2	1.03843245391667
ZDHHC11	1.03835
PCP2	1.03776626016667
SREBF2	1.03688
FRYL	1.03514130516667
NELL2	1.03413589833334
SLC25A1	1.03336973483334
PHLPP1	1.0325
HFE	1.02986
CTAGE4	1.02672420416667
ARL4C	1.0266
ATP6V1H	1.02472817666667
SCNN1A	1.02304329908334
ST7	1.02278
CEACAM3	1.02134097483334
P4HA1	1.01805673583334
PSPH	1.01768
BTNL9	1.01730853691667
SLC12A3	1.01599
ZNF662	1.0152
SIAE	1.01484
ADAM22	1.01261320491667
DAPP1	1.01095
TNFRSF13C	1.01091334933333
CALCR	1.00883543983334
TMEM187	1.00765
GALNT10	1.00734848441667
FAM177A1	1.0073
PRR15	1.00688701333334
GALNT12	1.00582
WIPI1	1.00514
FBXO21	1.00375
EHF	1.00318278166667
ABHD5	1.00104
CXCL13	1.00059464133334
ACSM1	0.998882228333334
EDN3	0.998855125500004
WFS1	0.998003773333332
CAMK2B	0.997892984166668
DCDC2B	0.997052502000001
NDUFC2	0.993098969166672
TTC32	0.992701985666665
UPF1	0.992607941500005
PGAP2	0.992439502833339
NSDHL	0.989089212500007
SYNJ2BP	0.986868679166669
PDE8B	0.985117764666672
TIPARP	0.984065798333335
MAP2K3	0.983819789166668
HIP1R	0.982998959166668
RIMKLA	0.980525192250001
ANKH	0.978885773833333
PAPSS1	0.978676052500004
NTN4	0.978452497000003
RECQL5	0.978116062666667
LPAR5	0.976942136833333
SFMBT2	0.974764689750001
CBLN4	0.973445
PPP1R13L	0.973086301833337
OR8H3	0.972421995666668
TMEM139	0.971893007250005
ITGA4	0.970083982833334
C2orf88	0.969876099166672
NEUROG2	0.969538921249999
STX18	0.969239991666669
POP7	0.968421106666671
AADAC	0.968369204500001
ARL4A	0.967855
PLEKHF2	0.967480140833338
RASEF	0.967479605083332
DSC2	0.966222453500002
PRB1	0.965631752250005
BNIP3L	0.964657836666666
TBC1D16	0.964542023083339
ACAT2	0.963418994166668
ORAI2	0.962925025000006
MCCC1	0.962751300833339
FAM174B	0.961905375000004
PARM1	0.961599147750002
THAP4	0.96092
CHKA	0.960534174666668
NEDD9	0.959033260916673
RORC	0.958061780083334
TBC1D8B	0.957814356333335
MUC7	0.956675355416668
SMAGP	0.956652950333334
SLC25A18	0.956193918500001
SMS	0.955874615000001
AFMID	0.955528764083333
LGR4	0.95475369916667
PRUNE2	0.953074854583338
PELI1	0.951629701666668
FRRS1	0.951599436333336
HEY2	0.951278442583339
ERLEC1	0.951044127500003
ARHGEF35	0.94986455091667
PRR13	0.949653860833337
PLIN2	0.948136669166667
B3GALT4	0.94780563916667
NEK1	0.946680682083336
VTCN1	0.946285701583333
ALAD	0.942133816833335
MT1F	0.941804770000003
ELMO3	0.940419562083335
EML2	0.939650983666668
FGF12	0.939367464416668
ADIPOR2	0.939009779166668
PYCR1	0.937965
CCT6B	0.937863345000003
USP54	0.936602675000005
PTPN3	0.936216323916669
CTAG1A	0.935237911083335
ALG13	0.934476049750002
ZNF185	0.933711162333337
CMTM4	0.933596590000002
CLDND2	0.933589416000002
XAGE3	0.933195719583331
MARK1	0.93254218791667
GCNT4	0.931960353166669
SEZ6L	0.931838923166666
ZDHHC2	0.928960008083337
TESC	0.928822457500003
RAB20	0.927080059000003
TSPAN11	0.925228332500003
CCDC159	0.921553594333338
ENO3	0.919640012500001
LYPD6	0.918028615916668
SYT14	0.916925212833337
HMGCS1	0.916164125333335
CYP26C1	0.915400766666667
PRB3	0.915387220083336
PHYHD1	0.914105363583337
COL1A2	0.91298316333334
PMM1	0.911416596666669
SLC9A3R2	0.910680964416667
ZFP92	0.910658127916669
SHISA3	0.909916189750001
CCDC61	0.908168
PPP1R36	0.907274326000003
CENPM	0.907015918333338
ANKRD44	0.906821289416667
TOM1L2	0.905738455333333
NKPD1	0.90526104216667
SPATS2	0.905064058333336
HSPA2	0.904343809166669
SOX5	0.903731752750002
CREB3L4	0.903221756666664
VPREB3	0.903138100833335
HIBCH	0.903017609166669
ACTN1	0.902544960833335
SH3GLB2	0.901905731416669
LYPLA1	0.901872548333335
NXPH1	0.900471357916668
RAB4A	0.900377873583336
MESP1	0.899655416583333
DUSP14	0.899483635833338
ANKRD30BL	0.899148223583334
WEE2	0.898914722083333
CELF4	0.898422732333334
SH3D21	0.896945798999996
KCTD14	0.895353321250003
PRR5-ARHGAP8	0.895058923166667
LMBR1	0.894948835333334
SCRN2	0.89346104066667
SLC37A1	0.892096677500003
SYTL1	0.891745775000004
ABO	0.890883245749999
MICA	0.890512467500001
SLC29A2	0.890287323500003
TMEM63A	0.889857093500002
METAP1	0.887676208333337
REPS2	0.887423042250004
RIC8B	0.886415817750002
DSG2	0.886053974666668
APOO	0.885202195833337
KRT12	0.882932633083334
STRBP	0.882627424166673
DOCK5	0.880471712666669
QRFPR	0.880170636416668
SRGAP3	0.879911569583334
ITGA1	0.879244545916668
LIPG	0.87919
FUT2	0.877806800083335
DHCR7	0.875303
WFDC8	0.874354196333336
PAM	0.873747832500003
SV2C	0.872770729750001
SLC12A6	0.870297792750003
FOXO3	0.867519591666667
CSPG5	0.867105065250001
ANKRA2	0.865512083166669
NPDC1	0.865342106666672
ARHGAP8	0.863102723666671
ENHO	0.863043527083336
ACADL	0.861971215333337
APOL2	0.86186289916667
IMPG1	0.860765953166667
BRF1	0.859654930000007
NALCN	0.859285164166669
SERINC5	0.858437973416672
GFM2	0.85829853916667
EPO	0.856971039749999
SUN2	0.856365965666667
SMOC1	0.856048652000002
MAN2B2	0.854976330083332
SCEL	0.854898773666669
GCNT3	0.854752963166668
TTR	0.854573341666669
HMGB3	0.854467225833336
LRRC27	0.853294038500001
RIPK3	0.853036241833334
S100A10	0.850208893333336
PRKAA2	0.848771633166667
SPEF2	0.847931440083338
FARSB	0.847223028416666
DOCK9	0.846979533333329
UGT2B11	0.84685094166667
AKR1C3	0.846522492500002
SMYD3	0.846015160833334
ETV2	0.845449053166668
FMN2	0.845250066166669
HNF1A	0.845152285250001
NEK10	0.844872298666668
DUSP4	0.844593245749998
PCSK9	0.844016664249999
GJB1	0.843962671000003
LCN15	0.843757536833334
PKP3	0.842920357500002
WARS2	0.841354075750004
WDR25	0.840763741833335
ZDHHC12	0.840211890833334
EPB41L5	0.840104918250001
ADM	0.839883119333338
ELF5	0.839348471000003
GALNT4	0.838904712666668
TIGD2	0.838874072833335
KLF5	0.838547855833339
AP3M1	0.83809321691667
SYN2	0.838074052333335
DNAJC15	0.834942437500001
PINX1	0.834534672000002
SPRY3	0.834493938416669
RASSF2	0.833342049166667
JPH1	0.833330185833335
CDC42BPG	0.833319770833334
AEN	0.833169444833334
ENDOG	0.832762355000003
PTPRG	0.831526831000002
RINT1	0.831474361833335
PDE4D	0.831379127666668
UBE2D2	0.829795408333339
CANT1	0.829230419833335
SLC22A18	0.82875975416667
SCD5	0.82794534216667
ZBTB20	0.827860795000001
NCALD	0.827537064916667
DHRS1	0.827398911666672
MSMO1	0.826562318166666
KLK12	0.825484324833336
GSR	0.825012389500001
TUBB4B	0.824460001666667
RNF43	0.823852438750006
NOS1	0.823412568416667
TUBB8	0.822619684750002
TMEM102	0.822370106750003
PCDH20	0.822350178333336
TRIM7	0.822220996000004
RUFY2	0.822088158083334
PPFIBP1	0.822085140000002
MVK	0.821633815000004
PTS	0.821593209166664
C7orf57	0.821494981333336
CEP350	0.821148807333334
AGRP	0.821084725750002
SPIN2B	0.818838295000001
APLN	0.817712007333337
HDHD3	0.816568542833336
RALGPS1	0.81587983616667
QPRT	0.815123695000004
RORB	0.81502430916667
PIM3	0.814902673333334
NOL3	0.814793882500002
CNKSR3	0.814498722500005
LINGO2	0.814372
CGN	0.813053516583336
TDP1	0.812719273333338
SLC16A5	0.812369957500007
LIN7B	0.812066569250003
MCEE	0.811884247500002
F10	0.811394651250005
CAMSAP3	0.810825156083338
ADPRHL1	0.809582892166668
ATF7IP2	0.809367131750001
EBP	0.808266182500008
CRISP2	0.807469363583335
EDDM3A	0.807464749166668
HARBI1	0.806987325416671
SLC37A4	0.806971754166668
PPA1	0.806813239166674
RCN1	0.806419940000005
TMEM132B	0.80635861016667
ARHGAP26	0.803593429416669
SELENBP1	0.802549427500006
C1orf122	0.802150549999999
ITGA10	0.801414859083335
UGGT2	0.799887622500009
DYRK3	0.799007210166669
EYA4	0.798296163583333
CTF1	0.797596019500004
RAB14	0.796980868916664
IRF6	0.796314506000002
JMJD7	0.795680692916669
BNIP3	0.794124085833333
RDM1	0.793387545750002
TFEB	0.793345273333339
GK5	0.793253844083336
ABCD1	0.792812790333334
FDFT1	0.791677752500002
DLX5	0.791517518333336
NOSTRIN	0.791033386666671
TGM1	0.790805767500001
RASSF7	0.788810184666668
ZDHHC3	0.788776382500004
MGST2	0.788114
SLC31A2	0.787858770166672
DLGAP1	0.785053799166669
GABRP	0.783815564166671
ECHDC2	0.782324446666671
MACROD2	0.781936268333334
EPSTI1	0.781302938583336
ZNF28	0.781013834333335
FGFBP3	0.780497656583335
ATP6V1C2	0.779578084166667
TSPYL2	0.779217974416668
OGFOD1	0.779081297500005
SERTAD2	0.778006244250003
SHROOM3	0.777887504166669
ICA1	0.776910112500001
SLC26A2	0.775961093333336
C4orf33	0.775255
SPRYD7	0.774452821333337
SOCS6	0.774427135583337
CDHR3	0.774411095166667
ZYG11A	0.774218
RINL	0.774050368666666
GLCCI1	0.773495
SNX5	0.773205419166668
PLAGL2	0.772488151500003
YARS2	0.77166776666667
PCLO	0.770967220916669
PLA2G6	0.770527543333335
ELFN2	0.770507477583332
VPS8	0.770471972166668
BAALC	0.769472705833337
TREX1	0.769250694500002
RPS6KA5	0.769138212500001
ABCA2	0.768240566166667
GORASP1	0.768024508666666
TRIM36	0.767306450833336
CYP27A1	0.766831937500005
NMRAL1	0.766032710833334
KIAA2013	0.765916467500002
C19orf81	0.764666214416668
DDB2	0.763988192500005
NUP210	0.763275179416665
FGGY	0.758421148333335
ENAH	0.757634154166668
INA	0.757172618500002
BEX1	0.756988170083335
LMTK3	0.756819016083336
FAM170A	0.756716543250001
CDC25A	0.756710839833335
IGSF8	0.756437032833334
ATG7	0.755360652833337
CS	0.754985285833335
CERS4	0.754711680416671
MCCC2	0.753655933250002
CAMK2D	0.753232390500004
KCNIP1	0.752929032583336
FAM174A	0.752511525750004
PICK1	0.752001663333338
TLR3	0.751645174250003
COASY	0.751171595833338
DYNC2LI1	0.750698772833335
CMAS	0.750268356916669
KCNN3	0.750083451250003
CES3	0.749268141000002
FHAD1	0.749180282250001
KIFC2	0.749147654083336
CPB2	0.748813269500003
POU2F3	0.748747154083335
PDE4DIP	0.748618000750003
FBXL16	0.746958085083335
COX16	0.745935385833334
RABGAP1	0.744441139250002
SEC24A	0.743461236666667
NUDT8	0.743318319166674
TMEM184A	0.742527342166669
MAGIX	0.742527158333338
CCL28	0.741753404166668
SDR42E1	0.741316824333339
AP1M2	0.740905515833337
MT1M	0.740737
MYO10	0.740641
AIFM1	0.740504370000004
HPSE2	0.740337024833334
FZD1	0.738395866666668
C17orf99	0.738159953333334
TNFAIP3	0.736495967833331
ACOT4	0.736432551083338
GAS2	0.736341774166669
ITGB4	0.735304940000002
CDC42SE2	0.734673186666669
TJP3	0.734205356166665
LRBA	0.73409
TMEM107	0.733769970833334
RHOU	0.733373665833337
RGS12	0.732053824333338
RAB19	0.730899730333334
DISP1	0.730296024833331
APOH	0.729731195583336
ZNF607	0.729449734166671
ITPR3	0.729200653333335
CASQ1	0.728794413416668
HADHA	0.728399493333335
THUMPD1	0.727421416833335
PDXDC1	0.727020874166669
SDR39U1	0.726891753500004
CORIN	0.726105459333334
UGT2B10	0.726029235000009
NDP	0.725588050583333
ABHD12	0.725184708166671
DYM	0.724991970000003
IL23R	0.724761878500001
C16orf86	0.724503564416668
GGT6	0.724216059000002
OR2A14	0.724017
PLEKHA7	0.723942289250001
IFT27	0.723781649166671
THOC3	0.723556592500003
NRG2	0.722251644083338
ZNF174	0.720953797749999
PLSCR5	0.720451491833336
MORN1	0.719820687666671
RASD1	0.719264665000003
THNSL2	0.719251316249997
PAPPA	0.71843098041667
PI16	0.718298251416666
MLIP	0.718047057250001
REPS1	0.718011843333338
GREB1	0.717340086833335
RTN4IP1	0.717092513666669
CNFN	0.716659330000006
PYY	0.716305578750003
CMTM5	0.715819922166668
GEMIN8	0.715621367750002
SRGAP1	0.715294540166669
DLAT	0.71528502116667
NGEF	0.715156203250004
OTUD7B	0.715066029500004
HOXB3	0.714845783750001
HSPA4L	0.714681334666668
GLRX2	0.714060765833336
GATA2	0.714045421583341
TPRN	0.713868926666672
MTR	0.713716440833339
VPS37A	0.71348650308334
IDI1	0.712476887500001
NEFM	0.711214368250003
MARK2	0.710281461000001
OCEL1	0.709688390666669
DAAM2	0.709627353000004
SLC9B1	0.708513873333334
UGT2B7	0.708231624166665
GARNL3	0.707700216666669
FAM83F	0.706228457666668
MOCOS	0.705227782750006
KRT13	0.704083870333334
NDRG4	0.703888958333335
KLF9	0.703643967500005
GULP1	0.703448853333336
LMTK2	0.703088216666667
INPPL1	0.702791222500002
SPINK6	0.702133
SRRM4	0.701705036166669
SEMA3C	0.701585460250005
SPOCK3	0.701035040500001
KCNG3	0.700728229333336
FBXO4	0.700559367083335
TOX	0.700438023583336
RAB11FIP4	0.700279038583334
RNF8	0.699573946083337
CHTF18	0.699489183083335
ESR1	0.699128975000002
KIF23	0.698718915666669
CYB5RL	0.697307029916669
LINGO4	0.696985928833334
CPT2	0.696521533916671
NTPCR	0.695699931416675
LPAR3	0.69567
COL25A1	0.695449397000003
VPS4A	0.695077487500003
ETFDH	0.693904250000003
TDRKH	0.693848112916668
CCDC15	0.693364
CXADR	0.693162039666669
FAM98C	0.692706348500005
CLCN5	0.692618982500003
NR3C2	0.692411038000002
ALCAM	0.692342125000003
SNAPC3	0.691786384583336
B3GALT1	0.691622337500003
SMARCD2	0.691482782833337
DBP	0.691241307250001
RPS6KA1	0.69066124966667
NAALADL2	0.69040380466667
RGS7	0.690292367583337
GNPTAB	0.690094524166671
LACC1	0.689968765666668
GMIP	0.689544490333335
ANO3	0.689339381583336
SLC39A4	0.688708557500004
PREP	0.688511039166668
NTHL1	0.688093802500005
MVD	0.688018158666669
ARHGAP18	0.687093474166671
C15orf48	0.68668799116667
CCDC102B	0.686609531500002
TAS1R1	0.685952856249999
PAK6	0.685937
PSTPIP2	0.684845373583336
TMEM131	0.684833185000008
ZBTB42	0.684449602916668
TRPM2	0.684313379500002
FAM110A	0.683094
SYT10	0.682646827666668
UBE2E3	0.682612280833334
METTL23	0.682565812500005
RGS7BP	0.681295230416666
FNDC5	0.681219
MBOAT2	0.681151776666669
CD9	0.68053912666667
ITGBL1	0.680428765083335
SGK1	0.678874839166669
SYNJ2	0.678729646166666
ZNF506	0.678702084333336
MAT1A	0.678280795166668
ACRBP	0.677933997166668
MRI1	0.677929895333335
CYP4F11	0.677678032250001
STK32C	0.677398
TRIM2	0.676826110000004
GNAZ	0.676780299250003
AFP	0.676246316833336
ATXN1L	0.675636991666666
PHLDA3	0.675504754000006
ANKRD37	0.675307680416669
LRTOMT	0.674761948916668
POM121L2	0.674557048916668
NDE1	0.674423521666672
ALDH4A1	0.674266396666667
CYP4Z1	0.674035901583333
AMOTL1	0.67398132416667
GANC	0.673825023833336
FGF13	0.673735236666667
SLC2A9	0.672069024999999
PANX2	0.671549620833335
SLC30A4	0.671073824500002
GALNT9	0.670892504250002
SCG3	0.670762
MYO18B	0.670007936000002
MT1E	0.669607170000004
ESRP1	0.669319098416668
FBXL8	0.669280614083336
FBXO24	0.669127756500002
FAM153B	0.667679310833334
SALL1	0.667563344250004
HEPACAM2	0.667226138333334
DCAF11	0.666889030666663
APEX2	0.666005418333334
TMEM80	0.665373443333335
ALKBH6	0.665188237916669
NAA60	0.665098152499999
BMPR1B	0.664875039166668
INSIG1	0.664774497500005
C12orf73	0.664715998916668
HPS5	0.664301037250006
VAMP8	0.664131481666676
PLEKHG4B	0.663874419333335
COX17	0.663832325000001
CERS6	0.663520075833336
MND1	0.663147271500003
SPTLC3	0.662537143916667
PTGR2	0.662337355250001
OR1D2	0.660711
PEX3	0.65914441716667
SLC35E2B	0.658565984500001
WDSUB1	0.657530862250001
GPR20	0.657134906583336
RABGGTA	0.656578554333333
GPM6B	0.655758321666672
SLC34A2	0.655537109166673
ANKFN1	0.655028892833335
DTX2	0.654078683000003
ARHGEF5	0.653120818416665
CIB1	0.651770757500003
TRIM68	0.651246067666669
PLA2G2E	0.650833203333335
KLF12	0.650755780500003
PIGP	0.649436808333336
TLL1	0.649379304000003
SAMHD1	0.649334167833338
DAPL1	0.649265015666668
GOT1	0.647941410000007
SFTPA2	0.647339916416669
CDK16	0.647196171666673
XPO6	0.647139016500004
RUNDC3B	0.646744895916669
AHR	0.646700838333334
FRMD4A	0.64662
EBLN2	0.646375269750003
DPCD	0.646183205833331
SLC23A1	0.645583079500002
PAAF1	0.643341340833338
TMEM79	0.643180526000004
STYK1	0.642591146750004
ADCY7	0.642424322000002
NPC1	0.641464705833336
DUSP28	0.641460120000001
RFESD	0.641305581416666
AP2A2	0.641206167500004
ZNRF2	0.640898155083335
SPATA9	0.640077947083333
CRADD	0.639569389166672
SMC4	0.638995304916666
CEP57L1	0.638036902000003
SLC35B3	0.63664184866667
MYCBP	0.636014777500003
TMEM184B	0.635820096666667
CEL	0.635555681833335
CORO1B	0.635456162333336
LONP1	0.635069639250004
CAPS	0.635041726666666
STMN1	0.634759830833334
PGBD2	0.634758185833332
ESRP2	0.63449410416667
C2CD4D	0.634467585583334
ANXA11	0.633771035833336
MBNL3	0.633139936583335
FLVCR1	0.632959318833338
CNKSR1	0.632662556750002
RHBDD3	0.632059199166667
ATG13	0.631693105250003
C21orf91	0.631659045166669
NPTN	0.631018047500001
PRRG2	0.630972481416668
CHAF1B	0.629833979000004
USP14	0.62982024341667
YIPF2	0.629359143333332
FAAH2	0.627823860166668
SLC5A4	0.627181972416668
FAM199X	0.627101912500001
TMED8	0.626518367416668
ARSA	0.626216067500003
DTNB	0.625877947416669
KCNS3	0.625870526333336
ZDHHC9	0.625803460833334
ARHGEF6	0.625786081000002
RAPGEFL1	0.625324368499999
ZNF572	0.624893673916667
FBXL17	0.624549898250002
CGA	0.62455
FAM177B	0.624017638250003
DHPS	0.623672437999998
ZNF101	0.623481082083336
C2orf80	0.621792057666668
HINT3	0.621504317500003
MMP15	0.620901844583337
SLC50A1	0.620786095500005
LINGO3	0.620553523500001
LENG9	0.620040141416668
IQCG	0.61892101066667
ANAPC16	0.617680816416671
AVPI1	0.617570001750003
OR12D2	0.617539711500001
IFIH1	0.617213836666672
RAB3B	0.617168600250003
DHRS4L2	0.616955209166674
TMEM116	0.616712456750003
PTN	0.616513631666669
TRIM9	0.616110130750001
FGF9	0.615098970583333
C4orf19	0.614881166833335
KRT26	0.614469645833334
BARX2	0.613915568666668
SLC25A4	0.613791146666671
TRIM34	0.613741576666667
SLC25A33	0.613547148333332
MCCD1	0.612891562500002
NCCRP1	0.612823178833336
TMTC1	0.612518750833338
ATP13A2	0.612007413416668
CRIP2	0.611937554999999
KLK7	0.610829676750001
NAGLU	0.609079115000004
NICN1	0.609013665833334
KRT80	0.608299685416666
CTSE	0.607588708916669
TRIM16	0.607426973333335
CA14	0.607421841250003
PACSIN2	0.605658004416666
CASZ1	0.605562757166668
TATDN3	0.605360892333337
C5orf34	0.605090465666669
GSTZ1	0.605026647083335
FBXL13	0.604378348833336
CXCL2	0.604114401750003
PLOD1	0.604056666666668
FBXO28	0.603743633750005
NHSL1	0.603627622083334
TMTC3	0.603350980249999
SHPK	0.602953965583335
B3GNT3	0.602490587916668
PPP1R9A	0.602169668583336
THAP7	0.602116412833334
TMSB10	0.601508016666671
MAGEA11	0.601238886000001
TMEM74	0.600711064583337
C9orf152	0.600612725833335
FBXO16	0.600538661083334
KSR2	0.599939858916668
DEAF1	0.599795534166665
BCAM	0.599430420166668
ACTN3	0.599362881666669
MYH7B	0.599235148833334
LRFN2	0.599135350000001
PPM1G	0.598689755833336
CHST3	0.598639903833336
MTTP	0.598344923000001
LDHD	0.598172228083333
POFUT1	0.598168030583333
TUBA3D	0.598111092166672
CENPN	0.598061
GKAP1	0.597662018749999
NUDT18	0.597617172666672
SERPINE3	0.597548056750002
PLEKHB1	0.597547721750002
SH2D4B	0.596986007333335
PPP2R1B	0.596315898583336
KIAA0232	0.595658043333337
ASCL4	0.595223057250001
QSOX2	0.594984936416665
TACC1	0.594091205833339
PRAME	0.592991175833337
FADS2	0.592720075000003
NR0B1	0.592710179333335
CLCN3	0.592685256750002
HAGH	0.592287870833337
MIA2	0.592283107250004
ISG20	0.591828177499998
ZWINT	0.591559946166669
ATP1B2	0.591160359833339
SH3RF1	0.591139711666669
RUFY4	0.590543640250001
SP6	0.590014967583335
PPP1R13B	0.589994
RAB11FIP1	0.58966154166667
TJP2	0.589605515000001
ABCB6	0.589116643333334
FTHL17	0.589086235000005
NCKAP5	0.588720222000004
LMBRD1	0.588383643333335
XPR1	0.588294925000005
ZNF436	0.588130020833335
CCR8	0.587344214333335
ARHGAP32	0.586098831166668
FKBP8	0.585511343666672
MAN1A2	0.585399120833335
ZC3H12A	0.585317979833333
ATP6V0B	0.584070793333337
KLF8	0.58262377566667
TRIM22	0.581288156166666
CSAG3	0.58101651316667
RPA3	0.580822987500003
MFSD11	0.580238899999998
CLN3	0.580135276333337
PSMD7	0.580124938333331
LIMD1	0.580119083333331
NOX4	0.579910872333338
SFXN5	0.579897273333335
PHLDA2	0.579758868583337
PCYT2	0.579746618333338
MANSC1	0.579417877166669
CNTN3	0.578312804083337
TSPAN5	0.577605793333337
CHORDC1	0.577520428083336
KLK3	0.577291532583335
SLC48A1	0.576534289166668
GRTP1	0.576201892083337
SCML1	0.576037441916669
DNAJC9	0.575599587500005
PDK1	0.575522479749999
REEP6	0.575417003333335
TUBB2A	0.575378809166667
SUCLA2	0.575190471666666
PLEKHG1	0.574673593166667
C1orf21	0.574156814333337
MAML3	0.573806
PIGA	0.573003381583336
FBXW9	0.572776040416667
GIPC2	0.572376056750003
HOXB5	0.572361190833337
STOML3	0.572268451000003
PRPH	0.571888401250002
PTER	0.571706219500002
FGF14	0.571010117000002
ARHGAP20	0.57089756916667
CLMN	0.570270102166671
ESX1	0.570242180666669
PTBP3	0.569582409166667
PAFAH2	0.569461837333339
HILPDA	0.568549116666668
LRRC28	0.567960030083334
FRAT1	0.567568270916668
CKMT1A	0.567204167083334
PLXNA3	0.567200635000003
LY6G6C	0.566950503416667
GCNT2	0.566617136083332
HOXA2	0.566527941916667
PARP8	0.566402790916669
OR4D6	0.564724799833336
C15orf39	0.563882066666674
DEFB132	0.562801213750002
SEC13	0.562446114166665
SIPA1	0.561669825333331
CEP85	0.561008302583334
SWI5	0.560803568333339
C9orf64	0.560493743083336
GCAT	0.560484665166671
KCNAB1	0.560332745750004
TMEM134	0.559582776666673
SLC18A2	0.559207342833334
C1orf210	0.558310751083332
CD1D	0.557975023583336
ZNF282	0.557255683999999
SLC6A9	0.557018555750002
FAM120C	0.556551443333333
KRTAP19-8	0.556059767916667
KLHL14	0.555923581416668
OTX1	0.555875727916669
SLC22A3	0.554994071916669
GLYAT	0.554749921416668
COL4A6	0.554356210333337
PLA2G4E	0.553814182500002
KIAA1522	0.55380605916667
C11orf87	0.552877246166668
TUFT1	0.551999234166669
ZNF275	0.551650025833334
ADCK2	0.550595334750001
AKAP13	0.549976584166666
NRN1L	0.549778277416666
LIFR	0.549111695833334
CBR1	0.54860254583334
RGS11	0.548203365250001
IVNS1ABP	0.547902300000008
ALG10	0.547465
DBT	0.546927266666668
ITPRIP	0.546897266666669
LRIG1	0.546482898333338
EEF2K	0.546480202500009
EMP2	0.546071454166672
ZNF578	0.545830631833335
ADAP1	0.545798877500005
SGSM3	0.545771502000006
ZBTB7B	0.54569474266667
TRIM66	0.545158942083336
C2orf15	0.544791660916668
PSMD6	0.544698298333335
EPS8L2	0.544082486833336
VWA3B	0.543586106166669
ECHDC3	0.543117835416668
SLC47A2	0.542692390250002
ITCH	0.542305554333335
VMP1	0.541823814999997
NT5E	0.541771201666668
FAM120AOS	0.541610403333339
SSBP2	0.541524003000003
OPLAH	0.540944065833333
AGBL5	0.540815303916668
CD27	0.540715232583336
DPP3	0.540555725833334
CHIT1	0.540350661416671
NEK8	0.53883
IMPA1	0.538687909166672
CCNI2	0.538672776416669
TM9SF3	0.538583499166668
LPCAT4	0.538572481833337
FBLL1	0.538483760000002
ZNF701	0.538204923333332
PPEF2	0.537729141083333
SAMD10	0.537359222333334
WDFY2	0.537277261500005
COL28A1	0.537002542166667
SLX1A	0.536955709166671
HAO2	0.536624910416669
FCRL2	0.536601483833335
ARFIP2	0.536495961666665
FANCM	0.535881823750001
ALDH1L1	0.535813896333334
VPS26B	0.535567146583336
RAP1A	0.535313890833336
NOG	0.535285367666669
TRPT1	0.535235277500007
WNK2	0.53490868141667
MRFAP1	0.534765666666676
VNN1	0.534377127416667
BDNF	0.534210811916668
TALDO1	0.53390629416667
DSP	0.533856950000008
NSMCE2	0.533605890833334
TTC12	0.533399659666671
KRTAP10-10	0.533317233500002
POLR2J2	0.532630203916669
MRPS34	0.532447949250001
FBXL18	0.532231902916665
BCL2L15	0.532033434333337
RTTN	0.531882492333335
CASQ2	0.531196460166669
ABHD12B	0.530984764250002
SH2B1	0.530892959416667
SSTR3	0.530852604250001
ALDH1L2	0.530751202750002
RGL2	0.530595338416669
TP53INP1	0.530466086666667
TFIP11	0.530371630083337
CD81	0.530126622500006
GPHN	0.52990283166667
ANO9	0.529481060416666
ARFIP1	0.529235278333335
URB1	0.529227805916673
SMUG1	0.528812048333336
OGFRL1	0.528370429833336
SYTL3	0.528318329250002
EPS15	0.52825223433334
AP1G2	0.528069524666668
AMN1	0.528042090083336
UBA1	0.527991760000004
SEMG1	0.527860004166668
JTB	0.527076449166673
ARSD	0.526882964166671
ARHGAP35	0.526240242166669
KRT2	0.526223947499999
CAMK1G	0.525739223500001
KIAA1671	0.525593340000004
AMT	0.525368257583338
PPIB	0.525244485000004
TBC1D7	0.525188305000002
BRD2	0.525014726666674
BROX	0.524693559416669
PYGL	0.524576322500002
EGLN1	0.524491463333336
TMEM161B	0.524122350666669
NPAS3	0.523826373333334
PSMG3	0.523802494416667
CHD6	0.523775104166667
DLG1	0.523571657083336
UTP15	0.523531940833333
KBTBD7	0.523338903416667
ZNF600	0.523330458583336
ZNF787	0.523212
CYP51A1	0.522963
DNAL1	0.522814362666669
GGTLC2	0.522745716416669
MAP3K9	0.522501304666668
ATP6V0D1	0.522258595833335
NOP10	0.522234032500007
KLHDC9	0.522160013333338
RXFP2	0.521988209083334
LRRC37A3	0.521849422166667
JUP	0.521814630833335
C1orf115	0.521306205250002
WDR77	0.520896346666667
PELI2	0.520699183083337
GPR62	0.520632966583332
KMO	0.520446653833337
VDR	0.52028
CYB561D2	0.519788839166667
DEGS2	0.519717882999998
SLC4A4	0.519295747916668
TBCD	0.519097287500008
UGT2B15	0.519062397750001
PIGO	0.518996394166672
TERF2	0.518770080833336
ZBTB8A	0.518708062500002
GREB1L	0.518582380750002
COG8	0.518374370833339
PPM1B	0.518306818333334
SLC44A3	0.518160518333335
CYP27B1	0.518119699416667
RNF13	0.518034948333339
CSRP3	0.517916552750001
IQGAP2	0.517746460000001
RPS6KC1	0.517731426416669
FAM166A	0.517564413250003
NUDT14	0.516755398500003
LCA5	0.516581391416667
DHCR24	0.516216
ZNF565	0.515588770666668
RREB1	0.515513700166666
PRB4	0.515283791416667
TRAPPC6A	0.515145400833335
AKR1C4	0.515032139583336
GPIHBP1	0.514197604083332
UNC13A	0.513752585083334
GPR180	0.513447577916669
ZNF264	0.513242139166666
ABTB2	0.512685224250003
OR5J2	0.512586184416669
SLC35E3	0.512317980333334
ZNF552	0.511628026416667
VPS39	0.511564919000005
DOK1	0.511477336666671
YBX2	0.51139758691667
BRCC3	0.511075327500004
GPR146	0.510689134833338
LENG1	0.510659432416673
ARMC3	0.510561188916672
MZT1	0.509907624916668
ALG8	0.509431925000003
THSD7B	0.509262486500001
GNAS	0.509115615833338
B3GNT4	0.508991413833335
MIOS	0.508926002500003
BSPRY	0.508876461666668
PRSS8	0.508869575833335
C1orf226	0.507449758083332
SPACA4	0.506634291166668
PIGB	0.506473030250003
STX12	0.506434464166674
ASB4	0.506273612916669
NWD1	0.506022249000001
STOX1	0.505940805000003
FAM83E	0.505533460000004
NUDT19	0.50523464566667
CDR2L	0.505118794416671
MEF2A	0.504042854999998
SYT7	0.503739111666668
ZMYND12	0.503727305083334
KLHL26	0.503675013750001
NDEL1	0.503630675833337
NXF3	0.503575190166667
WDR13	0.503017727500001
TMEM191B	0.502887203750001
CLDN7	0.502851219166672
FAM170B	0.502763
SLC25A40	0.502715457083337
TNFSF13	0.502671126249998
BET1	0.502506277416668
TSG101	0.501883382500006
ADH6	0.501577045250003
TEKT5	0.501285046083336
BBX	0.500985452500002
GOLGB1	0.500515
DAP	0.500511306666668
VMAC	0.499806363000003
DHRS11	0.499738632583334
FZD6	0.49852032716667
SP8	0.497960844666668
CMA1	0.497823297250003
TTC13	0.497700122250004
CRB3	0.497542026666665
SDSL	0.496864920000005
PTK2	0.495870944000002
NEIL1	0.495749904416671
CCDC81	0.495061169916667
ZNF341	0.494288102750003
NUDT9	0.494091
ZNF256	0.493898355166669
GLB1L2	0.493687239500002
MEIG1	0.493449820250002
DNAH9	0.493205432083335
GLYCTK	0.493031755833334
GPR85	0.492944169416667
KIF27	0.492584491666667
SLC12A2	0.49252
TSPAN2	0.492142940083335
KIAA1210	0.492067948916667
SLC2A2	0.491989667166668
UCP2	0.491883172500005
SLC35F2	0.491038750000007
CTNNBIP1	0.490848567500002
STK19	0.490517492500008
KCMF1	0.490327516750002
EFCAB11	0.489945336166665
LIG3	0.489900800750004
PRSS16	0.489592
HTR2C	0.489379262000002
FBP1	0.489241938166669
MCC	0.489202993083335
XYLT1	0.488809626083334
GALT	0.48875927766667
C2orf76	0.488698160000004
C11orf71	0.488597146750001
C2orf66	0.488483457166668
RNF121	0.488363023416667
DDTL	0.488164737333334
AFF3	0.488042725750002
AIG1	0.487937609999999
TIMM17B	0.487504130000005
MLX	0.487319980833334
C18orf21	0.487105637500004
BBOX1	0.486979001833333
SAV1	0.486966924166671
TPK1	0.48686502616667
TRPC3	0.486460498333334
RAVER1	0.486264616666668
ZC3H6	0.485966449750002
TPPP2	0.485523
NRL	0.485490348833337
SH2D3A	0.485168781666669
CPEB3	0.484990227500002
FBXL14	0.484406319166668
DENND1B	0.48425940916667
CCNL2	0.482958616083339
FGF16	0.482889
C9orf40	0.482317500416672
COX19	0.481593757916668
TMEM143	0.481453821083338
TCEANC	0.480629
CUEDC1	0.480601678166671
JAZF1	0.480600870000007
BNIPL	0.480429433833335
SCRIB	0.479273695000003
SMAD4	0.479089292500007
CYB5D2	0.478612207833338
CD80	0.478028627333335
DHRS7B	0.477891981666666
ACSF2	0.477782732916667
FAM104A	0.477755321666672
MAPK8IP1	0.477743502000001
PDGFRA	0.477600165833339
ABCC8	0.477535473083337
LRWD1	0.477438107500003
GSTO2	0.477061317000002
PAX4	0.477033146166669
SCARF2	0.476987215000005
LARP1B	0.476588149250007
STARD8	0.476424394416668
LAD1	0.476396678333339
SIX6	0.476359996166666
EZH2	0.476267904500004
CCDC110	0.476234640333334
AMD1	0.476046199166666
MYF6	0.476036511916668
IRS2	0.475666679333337
FBXW4	0.475495275833337
MOAP1	0.475467947250003
ZBTB7C	0.475378421416668
ENPP4	0.475304365833335
GMNN	0.475176956666669
GLO1	0.474655895750002
LOXL4	0.474578363916669
TRABD	0.474499383750002
FASN	0.474398093333338
RAD51B	0.474358169333337
RNF115	0.474219271499999
NLRP2	0.473763874333338
KCNA4	0.473632717500002
LRRIQ3	0.47358103716667
LSS	0.473452151666669
ATPAF2	0.472608633250001
SURF1	0.472277366666672
ZNF280B	0.472170069083336
ATM	0.472090680833332
NR1H2	0.47148983416667
IQSEC3	0.471326342250002
NADSYN1	0.471068939583335
ORMDL2	0.470993432500002
SMAD7	0.470674628333338
SMOC2	0.470156840000001
LRRC59	0.47002841666667
SYCE3	0.469954
SSNA1	0.469784530000004
MBOAT1	0.469643428333335
KLK6	0.469379663750004
ANKS1A	0.469166831666675
GOLGA6C	0.469144789000001
CST9L	0.468884
JOSD1	0.468808
SPRR2E	0.468748012000002
ADCY6	0.468680270583336
MARVELD3	0.468504122583337
FAM83H	0.468383143250001
C1QL3	0.467955935333334
SPRR2A	0.467388817833337
SLC12A1	0.467372998750001
KRTAP7-1	0.467307316333335
SCGB2A1	0.467251536666673
ROGDI	0.467197116333333
FGF5	0.466829162833334
MT1H	0.46598051166667
LRRN1	0.465767
YRDC	0.465672941666668
P4HTM	0.465621026666666
FANCC	0.465552238500001
HDDC3	0.465489547500002
GPD2	0.465354158749998
GINS3	0.465119486666673
LRRC41	0.464776584166668
CXCL3	0.464644062750001
PER2	0.464613635083339
ERRFI1	0.463917890000001
PAOX	0.463788887500002
PEX11G	0.463685905083338
PDC	0.463638914333334
TMEM238	0.462809253333333
GFPT1	0.462719310000004
SH2D6	0.462691545750001
CD82	0.462561490166673
C17orf107	0.462519317416669
ZP4	0.462501260916668
TMEM229A	0.46225682816667
SPICE1	0.461912354250003
UNC93A	0.460993515250001
TNFRSF19	0.460819022833333
MYH14	0.460761552250005
PTPRF	0.460644005833334
TOX2	0.460359890583335
MIEN1	0.460287635833337
RRM2B	0.460071194916669
DNAJB4	0.459900557250002
PCK2	0.459531082000003
STXBP5	0.459473781583336
RAB27A	0.459418565666668
MRPL23	0.459265962500005
MARVELD2	0.458986544166667
ACCSL	0.458975405916669
PAK4	0.458547059500002
PRRC1	0.457962243333341
CHRM1	0.457837287166668
FAIM	0.457627621666667
ADRA1B	0.457199086666669
RCOR1	0.457059853333332
DNAJC5	0.457009178666674
TMEFF2	0.456955192583334
INCENP	0.455667424250004
RWDD3	0.455528650833338
KRTAP9-4	0.455511075250001
FCRL5	0.455151939416668
CCDC134	0.45482854416667
MYL6B	0.454599989999998
FOXO4	0.454429697583337
HSD17B8	0.453899455833337
FBXO42	0.453740784166666
HSD17B7	0.453690013666668
EPS8	0.453581118333336
SMAP1	0.453463291333335
GTF2A1	0.453453441333338
DNAI2	0.453432823250004
MIER1	0.453338562500003
TSPAN18	0.453040382750002
TLK1	0.452377457000001
FRMPD1	0.452364269166668
PHLDA1	0.452342907166669
FECH	0.452209276166672
NCKIPSD	0.451943847416667
TMPRSS9	0.451864194583333
APOBEC2	0.451780308666666
ASPSCR1	0.451393135000004
TOR2A	0.451176249166672
NKIRAS1	0.451152934333335
MFAP3L	0.450973552500002
MYCBPAP	0.450823312916668
OR10Q1	0.450741291500001
AKAP9	0.45072074083334
CYP4F12	0.450350839166669
CUL5	0.450217639166668
MOB2	0.450000944083335
MYOD1	0.448917903166667
NPSR1	0.448792067000001
GRID2IP	0.448361493916668
EIF5	0.448164903333335
SEMA4A	0.447794589000001
CHD7	0.446934500333333
GPR26	0.446417071166668
DDX43	0.446259776333333
CTNNA3	0.446080311416669
PNKD	0.445987800833338
SYT17	0.445853492500003
TMEM54	0.445793720833338
RCN2	0.445773
ZNF451	0.445540709416667
RECQL4	0.445482098333336
HMGN3	0.445450753333335
ECT2	0.445290817750003
FDPS	0.445074345833341
TEC	0.445064451083333
ZNF813	0.445037214083337
STARD10	0.445036
C7	0.444964828166667
ZNF630	0.444814439833337
CDK6	0.444608318333339
AREG	0.444426223666667
IL1RAPL2	0.444283655833335
RNF141	0.444045999166669
MXD1	0.443900675083334
KIF3B	0.443776471666668
FGFR4	0.443693466666668
TEX11	0.442531142999999
DAGLA	0.442086266500002
TRAF4	0.441989295250004
GDF11	0.441860743916667
SPRYD3	0.441850840000003
MYL12A	0.441554627500008
EZH1	0.441476792250004
ZNF138	0.441167918166669
RIBC2	0.441023739083336
TRIB1	0.440585726666663
CUL9	0.440528146666672
RHPN1	0.440351598500003
PEX11A	0.440224025666669
ATF7	0.440139963750005
PMVK	0.440016272500003
SRPK2	0.439991954500002
KIF13B	0.439849075833335
AKAP3	0.439435601666667
NFXL1	0.43929530516667
KCNA1	0.439007277500002
FAM53B	0.438440599166672
SLC17A2	0.438286536166668
P4HA2	0.438095175000006
LRP2	0.437807794083334
MRPS17	0.437731450000001
ST3GAL3	0.437610281416667
BPIFB3	0.437528298416666
FBXO27	0.437481139833334
SLC17A6	0.436018149500001
ZNF474	0.435989818333337
RAB41	0.435971730583332
HMGCL	0.435525625833334
CD164L2	0.435445530166669
FAM91A1	0.435036267583337
KANK1	0.434958892500006
MED18	0.434836052000001
PEG10	0.434829613416671
IL6	0.434183960833336
PGRMC2	0.433952158333335
GYPA	0.433890636166669
FFAR3	0.433644770250003
NFYC	0.433190965833333
PREPL	0.432940638333335
SLC6A6	0.432731590000003
TCHHL1	0.432684156833336
BTBD6	0.432414834999999
PSMB4	0.432392715833339
CLEC3B	0.432368480833334
TBC1D13	0.432198051666669
HSPA1L	0.431994668750001
TRIM5	0.431832548750001
PLEKHM3	0.431659552583337
AGK	0.431433
SLC22A23	0.431131
PPME1	0.430776604000002
MTMR3	0.430496094250003
TOB1	0.430351248083335
GLB1	0.430208500833333
HIP1	0.429804648916669
GBP7	0.429774613333334
ZHX3	0.429684922083336
TMC4	0.42942689833334
KLKB1	0.429382190583335
ANKRD34B	0.429368083916668
ODAM	0.429318955666668
KDM3A	0.429058892333336
EFHC2	0.429014305583332
NDUFA7	0.428943042500002
SIK1	0.428917080666672
KCTD19	0.428657882083336
[truncated: 14,745 more rows]
