# Supplementary material for: Identification of hypoxia- and mitochondria-related genes associated with recurrent spontaneous abortion: an integrative bioinformatics analysis and preliminary validation
Source: PeerJ journal article supplement (doi:10.7717/peerj.20467), 2025-12-19
Supplement: Supplementary_Table_2.xlsx [file Supplementary_Table_2.xlsx]

## Sheet: Supplementary Table 2
Supplementary Table 2 ranked gene list for BSG-based GSEA
	x
S100P	3.11035
SDCBP2	2.69975333233333
PAEP	2.68984460216667
C2CD4A	2.67418884333334
HPSE	2.66165
SCGB2A2	2.57889561291667
GAST	2.49142033941667
ATP12A	2.44983
F2	2.33246030541667
ARG2	2.26064580433333
SLC37A2	2.19288
MT1G	2.17188493383334
FXYD4	2.13948
DEFB1	2.11533688358333
MT1M	2.07824239791667
B3GNT3	2.07424171508333
PROK1	2.02865
KRT80	2.01397285258333
NCCRP1	1.98707471216667
KRT23	1.98524
C4BPA	1.94959545433333
C15orf48	1.94168987233333
CRISP2	1.89899
KRT31	1.8867
PTPRR	1.86303850741666
GAL	1.84328
MT1E	1.82333
SLC6A12	1.81292
MFAP5	1.80666
MT1X	1.79666
GLYATL3	1.78392345458333
CXCL13	1.77408913716667
CYP26A1	1.76774
FBXL16	1.74150829358333
SLC30A2	1.73623
ENPP3	1.71632130616667
MAOA	1.70713756425001
CHI3L1	1.70158773358333
UGT1A6	1.68825372841667
CRYAB	1.67122
SLCO4A1	1.66619486541667
FETUB	1.65791696933333
KRT34	1.64998998683333
RIMKLB	1.61288
CYP2C18	1.60275761866667
DUSP2	1.59304213383333
MT1B	1.58996813166667
C15orf62	1.56384313716667
TSPAN8	1.56124874708333
PIWIL2	1.56044297383333
MT1H	1.54987827333333
TMEM154	1.54627649183333
ATOH8	1.54055560058333
ANG	1.54028549533333
GPX3	1.52976
S100A1	1.52589
SLC15A1	1.51493891066667
RBP4	1.50604
MMP10	1.49554552716667
TMEM45B	1.49013
PLA2G2A	1.48825
HAL	1.48697
GPX2	1.48097
PSCA	1.47810717433333
C2CD4B	1.46976944141667
SERPINB9	1.46301860858333
SLC39A14	1.46217
RPRM	1.44351728583333
IL1RN	1.44075145708333
IYD	1.43779
STC1	1.42746424166667
CYP2C9	1.42388
CD55	1.42379689491667
FKBP5	1.42225883566667
CP	1.42048627508333
SLC28A2	1.42048
MT1F	1.41518
SH2D1B	1.41105724241667
TNS4	1.39952
MT1A	1.39526884833333
ENTPD3	1.39383752091666
KRT7	1.39314910416667
GDPD3	1.38875765191667
IRX3	1.37653
ENTPD8	1.37388345991667
TMPRSS13	1.37357643483333
PHYHIPL	1.3678
PDK4	1.36595459833334
SLC1A1	1.35414
NLRP2	1.34732
SPINT3	1.33723
MSLN	1.33686
TRPM6	1.32232566041667
NOX4	1.31625
IGSF11	1.29964764766667
PRB3	1.29840189908333
CFD	1.29226780733334
CDA	1.28383798408333
SLC16A3	1.28344526083333
GBP2	1.28030688916666
CGA	1.27151
HSD11B1	1.26798
GLT6D1	1.25457352891667
GCNT3	1.24948
HMGCS2	1.24869862083333
TRPM8	1.24386864758333
GDF15	1.24360749833333
CHST4	1.23873719958334
TCN1	1.23781
BCL2L10	1.23350119441667
SLC5A1	1.23030945816666
GSTT2B	1.22179860241667
LAMB3	1.21645339683333
HBEGF	1.21372074608333
LRP1B	1.20947
GABARAPL1	1.20566224416667
SHISA3	1.20531
UGT2B15	1.19747
SLC24A4	1.19563
ISG20	1.19516073916667
SOD2	1.19446125583334
CD36	1.19345243758333
PTK6	1.19315
TSPAN15	1.18564344033333
PRODH	1.18533
STAC2	1.17696851883333
RNF186	1.17448322191667
CDH16	1.17432839441666
COMP	1.15759080033333
PPP1R1A	1.15747499616667
C1orf116	1.15407
DDTL	1.15289646583333
GNLY	1.14886
SIK1	1.14814
PRUNE2	1.14653908758334
KLB	1.14550159508333
ABCC8	1.14251
IER3	1.12995571316667
FGB	1.12963920316667
SFTA2	1.12657295433333
TACC2	1.12515268466667
FOXO1	1.12429205583333
DKK1	1.12066
APOD	1.11546
DUOX1	1.11363344458333
CA2	1.11006907158334
PALM3	1.10759
COL4A4	1.10422801258334
ACE2	1.10270097408333
S100A3	1.10261064191667
SPP1	1.09007259666667
PANX2	1.07292097516667
RASEF	1.07095
AOX1	1.07091
TMEM140	1.06903860741667
TWF2	1.06616
DUSP1	1.06543640958333
DDX52	1.06235480716667
PI15	1.06039539716667
KRT6A	1.06023
SERPINB5	1.05711
SCARA5	1.05369973266667
PPP2R1B	1.05305692391667
CXCL14	1.0512
KRT83	1.04625184341666
MUC15	1.03943
TUBA4A	1.03940852216667
ELF5	1.03900425683333
PYGL	1.03748226083333
DUOXA1	1.03256779716666
GLRX	1.03248553666667
LHFPL3	1.02608138691667
ELOVL2	1.02556
PRB1	1.02461536541667
CES4A	1.02304287308333
SDC1	1.02094234750001
KRT12	1.01961414691667
SLC3A1	1.01893259066667
DUOX2	1.01724192716667
LINGO4	1.01614351166667
RAB27B	1.01423555616667
MLIP	1.01051
DYNLT3	1.00278314183333
HS6ST3	1.00027
CAMP	0.997971398916667
TMEM63C	0.995888566416669
MAFK	0.994883937666666
TNFRSF10A	0.994555557749999
HGD	0.994012300833337
PTGER2	0.981392760083335
RNASE4	0.980519675083334
MOCOS	0.977806471083332
CLEC4M	0.977713534916667
SERHL2	0.977487474750003
SLC18A2	0.976349148166666
JUP	0.975099372499999
LPAR5	0.975097740666667
CHP2	0.970488460916663
UPK1B	0.969998362666665
CLDN4	0.969959559166666
CSF2RA	0.969091499666666
PTGS1	0.967830845333332
GAD1	0.966281410833334
PPFIBP2	0.962641397416668
CRISP3	0.962044350333334
TM4SF4	0.960193154916667
CYP4B1	0.956446060416669
CWH43	0.953208581666667
GZMB	0.953136698749997
MUC7	0.951960575749999
SLC25A48	0.951942117583334
PCOLCE2	0.948943575583334
LRRC52	0.944248
PADI1	0.938270211916665
S100A14	0.938191057750002
GALE	0.936855338666669
DNAJC6	0.932689651916665
XDH	0.930903
LCN12	0.929928543166668
C6orf141	0.927257537749999
HAP1	0.927212345583335
ANGPTL1	0.926985341166665
IRX5	0.926862443916667
APOL1	0.925006359166666
C4B	0.924859462416666
HLA-DMB	0.923759448333335
SCEL	0.921604951166665
RHOV	0.916036901833333
HTATIP2	0.914011978166668
ANXA4	0.912263814166668
SLC7A2	0.907240209166668
GGTLC2	0.906954
PGAM2	0.906473228583335
SLC31A2	0.906172831166668
GABRA2	0.904678
RRAGD	0.902481044916668
PCCA	0.902262112499999
ADRA1B	0.900846242499997
SLC46A2	0.899352998749999
PIP4K2C	0.897790811250001
RECQL5	0.895125600333332
THBS2	0.895003
MAB21L3	0.889233083333334
GRAMD1C	0.888532089249999
ADM	0.88778516883333
STBD1	0.887048285000001
PDE6A	0.886220086833334
FGF23	0.883160662166666
TRIM7	0.878579
DSC2	0.877836357666667
TNFRSF11B	0.877056291416666
SCUBE1	0.875572017083337
CATSPERB	0.875496473833332
MAL	0.874087028083332
MGAT4A	0.873315761416668
CD1D	0.873259886083332
A2ML1	0.871305530916668
OR9G1	0.871182794749999
NNMT	0.868179274666668
C2CD4D	0.864617
PFKP	0.862657302500001
MET	0.861926493333334
LPIN3	0.861196681083339
POU2F3	0.859342867250001
P4HA1	0.85912037916667
ALOX12	0.857650000916667
C19orf33	0.857192205833337
FHDC1	0.855672038500001
C3orf52	0.855286098916665
GRB7	0.853816216166665
RDH12	0.853546783166666
PHLDA2	0.850644392916667
CAPN6	0.850603570000002
EFNA1	0.849210241333333
IP6K3	0.848556614333332
UCP2	0.847598682500005
RORC	0.846215046583334
GPRC5A	0.845176
AMIGO2	0.844661669499999
FAM177A1	0.841995957500002
SGK1	0.841566440833336
SPINK2	0.841561239999999
CAPZA2	0.84146629833333
ELANE	0.841216546666667
PTGER3	0.837829171250001
SLC39A2	0.836864
SERPINB8	0.835183
ABCC3	0.831818477666666
PDZK1IP1	0.831208884916668
FUT2	0.829261
ZFP36	0.828699275833332
GALNT9	0.828596114083333
HOPX	0.828440941416662
ERRFI1	0.826595683333334
LRP8	0.825153
DNER	0.824885309583335
ZNF750	0.822309125749998
SPINT1	0.821513782083334
MRPS18A	0.821268785833334
EPS8L3	0.820411336000003
CHODL	0.820099357166667
RXFP1	0.819643205166665
ANGPTL4	0.819256070666667
ATL3	0.818419609333333
JUNB	0.814500471499998
SCNN1A	0.812761560749999
FAM110C	0.812001103249999
GRP	0.811476607083333
CYP2C19	0.810534
KIR3DL1	0.806267058166668
SOCS3	0.805890304583333
LEFTY1	0.805749496500001
ATP13A4	0.803147338666666
RHPN2	0.801513187499999
MT2A	0.801128809166666
UGT1A8	0.798624000166666
SYT10	0.796522004333333
MTMR7	0.795962777333333
NKX3-2	0.795419549583333
GDF10	0.795346827916667
SLC22A3	0.794048331916666
OR7C2	0.793856705416666
MAP1LC3B	0.793529587499998
C1orf210	0.787330955416667
PLD5	0.787201224166669
NPAS2	0.786529
ELN	0.782160992583334
NOS3	0.777446654249999
SFN	0.776516521666672
BSG	0.776007617499998
ACOT4	0.774987001083332
SLC22A18AS	0.774941159999999
TMC5	0.774004017333331
ZBTB16	0.77375737433333
TRPC4	0.772576
EDDM3A	0.771896110333333
NR4A2	0.770794233499998
BNIPL	0.770296
PLIN2	0.769587020833335
PRF1	0.768350111916667
ACSL1	0.764230844833337
COL17A1	0.762919
STAR	0.762764836166667
SULT1C2	0.762381646916666
CDKN1A	0.762193273333334
SYTL3	0.761138155416667
BDKRB2	0.759589980749999
THBD	0.759044276499999
CDR2L	0.758875632916668
LGMN	0.756747446666665
PRL	0.756356176416666
GALP	0.755958068833332
IGFBP1	0.755869352083333
TOB1	0.755763550250002
MMP26	0.75554
HAS1	0.755512589666666
NPTX2	0.752436269416666
AMBP	0.751772
SLC12A3	0.750883349833334
AZGP1	0.750662269333336
ASL	0.749927329999998
FXYD2	0.749742514416666
ODAM	0.749304347833334
KIR2DL4	0.749186679833334
ELOVL1	0.748951847500003
CHRD	0.747916844999995
TMCC3	0.746234503749999
JAKMIP1	0.745044994166667
RAB41	0.744342584083333
GHSR	0.743935001583334
B3GNT4	0.741517658999999
SLC35D1	0.741451412083333
NDRG1	0.738484090000002
TLR1	0.734974
HRCT1	0.733829130249999
TSC2	0.733651184333329
TP53INP2	0.733265570249999
BMP6	0.731779316416664
BTBD3	0.731283609999997
MICB	0.730225570749997
C6orf132	0.729815521916667
SPHK1	0.729411670833333
BDKRB1	0.729258492416666
GGTLC1	0.728995875166664
TTC39A	0.727775420833334
KCNK1	0.727625441666669
TMEM169	0.726680488333335
CMTM5	0.726151705499999
MUC20	0.725823168583334
HSD17B6	0.72312
LIF	0.722074288666668
SECTM1	0.719986510666665
RAPGEFL1	0.718669078333334
AQP5	0.718495511749997
DYSF	0.717636390249999
KRT26	0.717433
ETHE1	0.717416312666671
AHNAK2	0.716389195750001
DBNDD1	0.714651
RILP	0.713304003666665
STXBP1	0.713131996000001
ID4	0.711878003333331
CELA3A	0.711636147749999
CEACAM3	0.710943
PPM1M	0.710510092499996
PRG3	0.710131
LMOD1	0.706849816749999
PITPNM1	0.706171008416669
TM7SF2	0.704853422583335
ACSF2	0.703764910250001
NUDT14	0.70354935766667
IFNGR1	0.702710285833334
IFNA16	0.701192369083333
BAALC	0.700550486499999
LCE5A	0.699621287833333
SLC9A3R1	0.699108432166666
CBLC	0.697468972583335
PPM1H	0.696823871416667
HSPB3	0.696542
FAM13A	0.696316065249999
GADD45A	0.696081956666667
CXCL1	0.695852850083334
NT5E	0.694313086666668
MGST1	0.693251503333329
SBSN	0.692616412583334
USP53	0.691553513333339
AP1S3	0.689756375083338
MYOM1	0.688001150083334
B3GALT4	0.687742550833333
MFHAS1	0.686825444416666
KLF6	0.686114228333338
SLC26A2	0.686063998333328
NGEF	0.685325730583333
RAMP2	0.684959702083337
PYGB	0.683676974166666
TRNP1	0.683502723416668
PRSS22	0.683322519166667
VPREB3	0.682468627833337
B3GALT1	0.682104672999999
SPINK1	0.681617001499999
UCK2	0.680568062999996
PIK3IP1	0.679765823333333
TPK1	0.678500620166666
ACCSL	0.678327595750001
SLC43A1	0.676902168416667
TUFT1	0.676762232499996
MAPK3	0.676742482583332
CTSW	0.676254248666666
ABCG1	0.674824879166664
CERKL	0.674709044249999
HSPA4L	0.674375781166668
POU5F1	0.673494034166666
AVPR1A	0.673341042583332
NPR1	0.673304671333335
PRSS57	0.673205385749999
HNF1B	0.672429074166668
LDHD	0.671137667749999
ANKS4B	0.669959
EZR	0.669656
ADAMTS1	0.668896962000005
SLC27A4	0.668825655583332
DLGAP1	0.668762511833333
CAPS	0.668735309999994
ORAI2	0.668348945666668
IL22RA1	0.668056
IDO1	0.667958885833331
MAN2B2	0.667206662416667
OR10K2	0.666591050166666
MAPK8IP1	0.665834491833333
CRIP2	0.665767329999998
ADARB2	0.664747201000001
MSI1	0.664066563916667
OR2B6	0.663727
ATP13A2	0.663332933083336
ITGAD	0.663076912166665
EPHX1	0.662821766749998
ANKRD33B	0.662725497833332
MICA	0.662003024166669
GCNT4	0.661294757166668
HSPB6	0.660967213333334
CD200	0.659927030166667
CYP19A1	0.659817934250001
ACSL4	0.657619043999999
FAM25A	0.656438009333334
CCL13	0.656047080750002
PITX1	0.655875935499998
FREM2	0.655060694166664
TPD52L1	0.654974259999999
TINAG	0.654831431333334
PSG5	0.653048200833332
FKBP1B	0.652742936833333
LGALS14	0.652483
ATP6V0A4	0.650557711083331
CITED2	0.650254884166666
SCGB1D4	0.648603311916665
CLCF1	0.648148263083331
SLC2A9	0.648139719166666
TCTA	0.648036283749995
HSD17B2	0.647606068250003
KLC3	0.647529
SLC38A1	0.647336088083332
LY6K	0.645785660249997
ARSB	0.645542
LETM2	0.644666352666666
SH3BGRL3	0.644101285000003
DAGLB	0.643269724333332
KCNK2	0.643263300666668
TLR4	0.642335973916667
PHLDB2	0.642286852083333
ADAMTS4	0.642130164416667
COL8A1	0.640279604749999
MS4A1	0.638752312500001
PPP1R3G	0.638130857583331
CCDC61	0.638086534833329
C11orf80	0.637924905833332
TFEB	0.637716631666661
RGS11	0.637014850749997
C4A	0.636922073416668
CPT1A	0.636401613416664
TMEM61	0.636260255000002
SCN4A	0.636195664583334
ABCB9	0.635457118500001
CERS4	0.635310094916665
YWHAZ	0.635184886583334
TC2N	0.634173359333332
PNLIPRP1	0.634162888749999
CELA3B	0.634101522416668
WIF1	0.633575721333334
PDE9A	0.633163108083332
VRK3	0.632765735416665
RAB11FIP1	0.632662166666663
XAGE3	0.631256489916665
WWTR1	0.631137335749999
SFT2D2	0.630496722249999
LRTM2	0.62992
UPP1	0.628741430833333
SGPP2	0.627570727749996
GMPR	0.627323799833336
GGT1	0.627188557833337
G6PD	0.627075877666666
SPINK5	0.626667656000001
SLC38A4	0.625446490333332
HSPB8	0.625143561250002
MST1R	0.62385
PLLP	0.623696687916667
CYP3A5	0.622308458166666
ACADS	0.621758614083336
CD58	0.621669401166665
RIPK3	0.621606556833335
ST18	0.620871006083334
HDHD3	0.620555788499998
ZG16B	0.619495988166669
NR4A3	0.618152986166668
ANXA1	0.618111063333336
NPW	0.617983481416667
ZHX3	0.617872068083335
LINGO2	0.616935763833336
TAGLN2	0.616399854166666
ADAP1	0.615905115166672
SYN2	0.615759
SNX9	0.615278611916666
KSR1	0.614905361750002
ERMP1	0.613612512333331
ADCY1	0.613580404166665
MAP1LC3A	0.612905956083333
C2	0.61220840383333
ATP2B2	0.611389154166667
RFPL2	0.611291229583332
PTER	0.611059732833334
CLDN7	0.610618497500003
TAAR8	0.608997802166667
PDE1C	0.608204061499999
DEPTOR	0.607108684166667
ELOVL7	0.606919047166667
SHB	0.606255734666669
HOMER2	0.605170439333337
MRGPRX1	0.604781027250001
ANXA2	0.604397481666672
MAP7	0.604316009166668
TBC1D2	0.603387100833334
TBC1D8	0.602903580583336
STAB2	0.602814669249998
ATG16L1	0.602585762499999
CST11	0.602138058833335
HES5	0.601929060583334
RHCG	0.601151
ACTN4	0.600708882499999
GDA	0.600294061583334
KCNJ16	0.600275744749999
FAM89A	0.599200458000002
KRT6B	0.599172682583332
CCL8	0.599058457333334
CORO2B	0.598283470249999
USP43	0.597948075416669
ANKRD9	0.597213058333327
COL4A6	0.596491177999999
MYOCD	0.596250347750002
NFIL3	0.59617947416667
DUSP4	0.595278
ASPG	0.594895
CA12	0.594343276916666
CAPG	0.593965527499998
PLSCR5	0.593774122833332
IGSF22	0.593064224333331
TIMP4	0.592576258333332
GNB5	0.592425809666667
SCIN	0.591173734750002
BARX2	0.591012679500002
SSBP2	0.590855341166664
RAB21	0.590742191666671
GZMA	0.590274602500001
PID1	0.589704773833333
KLK12	0.589412847666665
S100A2	0.588431707916667
ALDH3B2	0.588384210083332
SPATA12	0.587604965166666
IL15RA	0.587463222333332
STXBP5	0.587454351916669
TLR3	0.586489335583334
SERPING1	0.58345143958333
CYP4F3	0.583342
KLRC4	0.583019446000003
SERPINI2	0.58301
BACE2	0.582729914999996
SEC24A	0.582139443333329
FLT3	0.582081847166666
ZNF157	0.582024377166668
ALDH1A3	0.581427
PRB4	0.580395014416666
TNFRSF12A	0.579739850166664
IFNA10	0.579401749833334
LRRC15	0.579014143416668
GAPDHS	0.578777691249999
ACTG2	0.578570636916668
CTSD	0.578079891666668
ITIH3	0.576256985000001
IRF2	0.575722162916667
PNP	0.575013986666667
STXBP2	0.574826414666667
KCNK7	0.574370381083332
ERP27	0.574349226333332
ACSS2	0.573559401333332
TPPP	0.573453859666671
PHF8	0.572996885750001
TYR	0.572820153416666
ELAVL3	0.572277726916667
IRF5	0.572168174749997
ROS1	0.572076390833333
C11orf94	0.571033777499999
MAGEA2B	0.570917198500001
STAT6	0.570314
OR10AD1	0.569530705249997
RPN1	0.569183430833332
NEBL	0.569148868916665
FBXO27	0.569011585333334
TMTC1	0.567011555833334
S100A16	0.566661579166666
STAT3	0.566102435916671
EPAS1	0.565983339166671
SMPD1	0.565972314666672
ACMSD	0.565064844583334
ACOT11	0.564937304000006
SNRNP25	0.564695785833331
HRH1	0.564393
ARID5B	0.563866060833334
OR52E8	0.563751898916668
PLCL1	0.563732248416667
GP2	0.562920083083331
TNNC1	0.562277173333335
ABCA3	0.561538
G0S2	0.561197215666668
AFM	0.560823346000002
PDGFA	0.560715250249999
EDNRB	0.560431299083334
LRRC26	0.560276457000001
RPS6KA5	0.559525104166669
FAM107A	0.559075986416667
HOXC9	0.558478288499999
C11orf52	0.558105273333334
SLC6A9	0.557429394749999
RRAS	0.557177337500002
PLCXD3	0.556415174166668
PECR	0.556031757999998
TMPRSS4	0.555671909500001
SDC4	0.555616600250003
PC	0.555491513416667
SKAP1	0.555083054166664
IRF6	0.555037005166671
MTF1	0.554929346000003
SLC35D3	0.554618469583334
CCL21	0.554214957333331
PKDCC	0.554121389750001
EMILIN2	0.553468921666667
RNASE10	0.552873507833334
LIMK2	0.552470022500001
PPP1R11	0.552186577666667
HSBP1L1	0.552008152416665
RGS16	0.551703220500002
GLDC	0.551599629583336
CNKSR3	0.551326340833334
MAGEC3	0.551271193416666
JOSD2	0.550620536666663
SFTPA2	0.550416100583336
SH2D3A	0.550028921666669
CSAG1	0.549634340333333
ACTC1	0.549506
LAG3	0.549255331583332
FGF7	0.548717024750001
TPRG1L	0.548496473166663
CD9	0.54831621833333
PERP	0.548214939166668
ABHD5	0.548136590833334
CATSPER1	0.548036411916665
PER2	0.547733231583331
NR0B1	0.547189945000001
ATP6V0B	0.546774598333334
S100A6	0.545705166666664
AGTRAP	0.545236262583334
FOXD3	0.544916051500001
SLC25A4	0.544362781666667
GABRP	0.544006772500001
CCKBR	0.543995968666666
SVIL	0.543907287666665
ACOT12	0.542903439583334
SIAE	0.542361847749998
INHBB	0.541871252000002
HYAL3	0.54174262858333
ANKRD22	0.541644287333333
PTN	0.541398066666664
CEP44	0.541249066416666
FICD	0.540532251666669
LPAR2	0.540427992833335
TAGLN	0.539887486750001
OR8B3	0.539820053500001
CHPT1	0.539617
FAM131B	0.539031075750001
CCL18	0.538958481416668
LRRC1	0.538868
STK38	0.538371447166667
PIK3CB	0.538032066333333
PARVB	0.538019
CLDN22	0.537690037916668
FXYD3	0.537589244999996
DCTPP1	0.53697016916667
MYLK3	0.536962125166665
RAB4B	0.536879082250001
CHMP4B	0.536748
COL5A3	0.535428896583332
PLXNA3	0.535195149999998
GSTM4	0.534778476083336
SLC4A2	0.533559986666665
BCL6	0.533367172499998
TRPM3	0.533292025166666
GPR108	0.531882794083335
CBX4	0.531288887916666
PPP1R36	0.530412595166666
EPHA2	0.530262271916668
CNNM4	0.529929524999996
ASTL	0.529592950000001
FAM83F	0.529475779333332
B3GNT2	0.527058053499999
MIF4GD	0.526932151416666
ADCK2	0.526856067083332
SLC37A1	0.526638682166668
LACTB	0.526493118916666
MVP	0.525810873333334
ACTBL2	0.525787698083331
TMUB2	0.525718036666666
LMX1B	0.525331508083335
LRP11	0.525085355499998
SLC10A1	0.524829830250001
AQP10	0.524819141666666
XKR7	0.524611135166666
CDHR1	0.524445537249998
ACTN3	0.524388325333334
S100A4	0.524366004999999
TGM5	0.524297404833332
HMGCR	0.524001736666669
APOL2	0.523927119166665
ANXA11	0.523599000833338
FOS	0.522900099833334
GPT2	0.522732175166663
SLC25A38	0.522255813333329
LRP10	0.521878841666668
HKDC1	0.521844620666666
TMEM139	0.521725291416661
TMEM196	0.521636012416664
HCCS	0.521369254166668
DUSP10	0.521249515583334
C19orf67	0.521207016000002
TFCP2L1	0.520336444250004
TRIP10	0.519499388999996
GPR137	0.519310148583335
TSHZ2	0.519296508083332
FMO5	0.519104309583334
GIPC2	0.519055629249999
SMG7	0.518820676166666
NDRG4	0.518748288333333
LRRC41	0.518298281666665
SLC7A4	0.517037664333332
ATF3	0.516919536249999
CLEC3B	0.516378857499999
AADAC	0.516354886499999
ANKRD55	0.516221629333335
TUBB4B	0.516048271666667
LEFTY2	0.515940614333334
TESC	0.515725980833331
C9	0.515637604833332
FAM149A	0.515341956083333
KRT8	0.515118719166665
SCGB1D2	0.514368120000002
PPARG	0.514293859999999
PLCD3	0.513415882999998
BAG3	0.513258814666671
CORO2A	0.513017496666667
SLC4A11	0.512810966000002
KIF21B	0.512636
CLDN8	0.512546
AFP	0.512417
GJA5	0.512227282416667
REEP4	0.512144517166668
RETSAT	0.512056529666664
TOM1	0.511868491666661
ATP6V1H	0.510854665333333
PRR14	0.510717223833334
KRTAP7-1	0.510608716666666
KIAA0930	0.510411767250002
CABP1	0.510118968333335
UAP1	0.510033300833335
SH2D6	0.509958664416667
TRPM4	0.509914
SORCS1	0.509676
B4GALNT1	0.509413963333335
NGFR	0.508603670000003
CXorf66	0.508584595833334
KCNG3	0.508584203833333
SLC25A10	0.508256315500002
GUCY2D	0.507882190666667
IDO2	0.507563625166665
NQO1	0.507424525166667
CDH3	0.50722
ARHGAP29	0.507081849583333
ACTN2	0.507048917750001
QRFPR	0.506949
HEPACAM2	0.506746999333332
PADI3	0.506711430666666
ATP6V1A	0.506638694166664
SH3BGRL2	0.506576320083331
JUND	0.506554448000001
RINL	0.506159633000001
PM20D1	0.506147450833335
P2RY2	0.505955860000004
FAM50A	0.505639955000001
ADIPOQ	0.505364488916666
PIH1D1	0.504997479166661
KRT33B	0.504384141416667
PAPSS1	0.504284252499998
OR7A5	0.504198429666667
KLHDC8A	0.504177493083332
PTX3	0.503508945583333
URB1	0.503508835249995
ARHGDIA	0.502695944166668
LMO7	0.502548587083336
FAM25C	0.502284671666665
TIMP3	0.501866002500003
SPATA2L	0.500985183333336
PHACTR1	0.50095810383333
RND2	0.500666
SIX2	0.500485714083332
BAAT	0.500356343166664
UGT3A1	0.500355396499999
PRSS16	0.500290642666666
DHCR24	0.500098546833332
PLA2G10	0.499793843166668
KRTAP10-10	0.499756868666665
BPIFC	0.499696692999999
FGG	0.498971319250002
SIRT2	0.498727060833332
GLIPR1L1	0.497823636166667
C1orf53	0.497584
AVPI1	0.497379589750002
TMCO3	0.497175924333336
BCKDHB	0.496829681166668
SLC44A4	0.496411275000003
TAPBPL	0.496041142666666
GPR160	0.495946105833337
TMEM150C	0.495358851416666
SIK2	0.494101641083333
EPS8L2	0.493855780333334
FAM20A	0.493657020083331
RERG	0.493359554166663
ADAMTS5	0.493103098916668
RAB40AL	0.492546755749999
CD80	0.492356761833332
CDH1	0.492110286666666
SLC47A2	0.491901173916667
ITGB4	0.491900061666664
MCOLN1	0.490787840750001
COPE	0.490610254583332
CLPTM1	0.490431960750001
SLIT3	0.490396610833329
IGSF8	0.49027392733333
C8B	0.489596518833333
FAM177B	0.489319741416664
CSTB	0.488847209999998
MAPK8IP2	0.488495503999999
APOL4	0.488252510916668
PRDM8	0.488215176416665
SPIB	0.488131463916666
CLDN3	0.488122018333337
ENDOD1	0.487964130249996
CHST1	0.487630350333333
GK5	0.487448722416668
CNPPD1	0.487036990416666
PSTK	0.486269106583332
MYO1D	0.486140116083334
AP1M2	0.485850524166665
CEACAM6	0.485498767666668
SEC14L5	0.485346205916665
SUMF2	0.484865730000001
CLIC3	0.484831
SLC50A1	0.48482626283333
PTP4A1	0.484763600833332
SYNM	0.483968683916665
SHKBP1	0.483386063916667
APEX2	0.483255648333335
AHSG	0.482986768666665
THBS4	0.482692012833331
HYOU1	0.482481
ASCL2	0.482313811583328
SNX11	0.482272992083333
CLIC5	0.481930252499998
ADK	0.481028594583332
SGSM1	0.480880145083334
EFHD2	0.480705585833332
TUBB8	0.480526948250002
DEFB119	0.480440877583334
C2orf88	0.480068209166667
PACSIN2	0.479990887750002
KLRC3	0.479581477666667
PPP2R5A	0.479422868833332
CSNK1D	0.479310527749996
ITGA3	0.479200243250004
ANXA3	0.478873517499995
TMBIM1	0.478852007500002
RASGRF2	0.477943913666667
LGALS3	0.477529689999999
GDI1	0.477501674166668
B4GALT4	0.477441758000003
STK24	0.47721
MAGIX	0.476988136666668
WDR1	0.476411324166669
LOX	0.476202996333333
KCNK17	0.475234
GDPD5	0.475214499583331
HLA-DOB	0.475064142083333
MYL9	0.474747786666663
B3GNT7	0.47468508191667
PSEN1	0.474594966666666
IDS	0.473824548583334
STX11	0.473620478416668
SERINC2	0.473471009666666
GCH1	0.473143069666667
ALAS1	0.472889772916668
UNC5CL	0.472601845083335
ARHGEF12	0.472589653333331
PRRG4	0.471131982499999
CAPNS2	0.470527683250001
SCAMP2	0.469750003083334
GPBAR1	0.469674351999998
WBP2	0.469243624583333
SQSTM1	0.468966404166663
CTSA	0.468626355833331
ERBB3	0.468439
YPEL3	0.46822
PRDX5	0.468080434999997
ATG13	0.467906907583332
MYL2	0.467706122083333
PYGM	0.467701441666668
TMC1	0.467625
SERPINB3	0.467041974333334
APOC2	0.465606479916667
CPNE5	0.465421663916665
F12	0.465218749749999
HABP2	0.464740823416665
ZNF552	0.464444402249999
TMED3	0.464219941666668
DRAM1	0.464004638333337
HTR2A	0.46367827558333
AHRR	0.463454457916666
TMPRSS3	0.463434884166667
METRNL	0.46342874583333
RAB40B	0.463392182416667
TMOD1	0.463094995583331
CAPNS1	0.462921199166665
ATP6V1B2	0.462919264166668
IL17B	0.462577803916667
SLC7A5	0.462440327000003
ACSM1	0.461910696666665
TRABD	0.461660952083336
DHDDS	0.461223446999998
PPP1R3C	0.460404353833333
AIDA	0.460325846416669
FOSL2	0.460324630333332
TNFRSF13C	0.459621000833331
KRT6C	0.459548
DENND3	0.459442294583333
RGS13	0.458676356916667
CEP70	0.457944
SLC23A3	0.457560679583333
TMEM213	0.457097735083333
HOXB5	0.456798665833333
SLC30A1	0.456771683083334
KIF1B	0.456747202166667
CD300C	0.456667072333333
FAM114A1	0.455638596833337
OR4K15	0.455508406749998
VSX2	0.455349902833333
NOXO1	0.455276841583333
ARHGEF37	0.454778609333331
DBNDD2	0.454717833749999
KRTAP19-8	0.454434127916667
AKR1A1	0.453886008333329
GPD1L	0.453089735833334
AFF2	0.452959878416667
SLC15A4	0.452811849749999
SLC12A7	0.452792781666671
MAP3K8	0.45268108058333
VTCN1	0.452670651083338
GNA15	0.452515793500001
SH3GLB2	0.452458661583334
JAG2	0.452407697000002
CXCL17	0.452377672166666
UBE2L6	0.452013435833331
DPEP1	0.451756788916668
MOAP1	0.451432959416666
BTG2	0.451215
TACSTD2	0.450918
FCRL2	0.450661065833334
RTKN	0.450493416166667
ARC	0.450351711249999
ANKRD53	0.449827828749998
OCA2	0.449820283333334
KLF4	0.449792
UCKL1	0.449390826583336
CNFN	0.449297104500001
AGMAT	0.449112674249999
FLOT2	0.448989173333331
ST3GAL6	0.448848406666666
CACNB2	0.448391292916667
KRT19	0.448388250000001
NRP2	0.448109850416668
DOCK8	0.448067371250001
RIPPLY2	0.447847
BPIFB2	0.447671234333333
PRAMEF8	0.447662
TMC4	0.447378653333335
TMEM102	0.447263081083332
FARP2	0.447177
S100A11	0.446676043333337
KCNA5	0.446623989083332
IDH2	0.446427822499999
DUSP3	0.446303047000001
MLX	0.446179714166666
CGN	0.446026593416663
ELL2	0.445737818833331
ECH1	0.445719348333332
DNASE2	0.444984836499996
SDC3	0.444953127666666
SLC40A1	0.444897189166666
SAMD13	0.444510002666668
DCXR	0.444485408333337
ACTA2	0.443865919166667
ABLIM3	0.443399102333332
LENG9	0.443285207250003
TMEM171	0.442999879916667
RAB11FIP5	0.442857328000001
KRTAP21-1	0.442511863916667
SLC22A18	0.442081374166667
RAB6A	0.441898090833329
GMNN	0.441829831666668
ARHGAP15	0.44164836308333
APOC1	0.441581098416663
FLII	0.441328084166665
VCAN	0.441276880833335
ABCC9	0.441166669666666
F13B	0.441138377333333
TOX2	0.439869804916666
CORO1B	0.439322537500001
SLC38A2	0.439295581666668
MICU1	0.439079343416664
CHI3L2	0.438917
OXCT1	0.438817060249999
MCU	0.438295571916668
TM9SF1	0.43826665166667
FGFBP1	0.438144152583334
ARHGAP24	0.438107965500001
UCMA	0.437910377833334
BTNL9	0.437718463583334
HLA-DMA	0.437695004333332
GJB6	0.437167
DNAJB9	0.437146820833334
TREM2	0.437026594333336
RIPK2	0.436777636666667
PKP1	0.436687367916667
MTHFD2	0.43665051583333
OXGR1	0.436611894083334
PHLPP1	0.436489017666667
ALDH3B1	0.435679
SFTPA1	0.435498213166666
LZTR1	0.435497616916665
SYT6	0.435404390166666
RAB5C	0.435274283583333
ARHGAP8	0.435099521499999
ALDH2	0.434907554166665
XIRP2	0.434413911166666
KLHL21	0.434375
SEMA4B	0.434254
CCDC152	0.434187
PER1	0.433964877999999
FBXO10	0.433514631083332
ATP6V1C2	0.43311707783333
FBXO8	0.433027739166663
IL18BP	0.432982754333332
CDK18	0.432977513916668
SELENBP1	0.432557632499998
TMEM53	0.432204331000002
TFG	0.431645765833332
NUAK2	0.431641564833331
CRISPLD2	0.431254897499999
DLGAP2	0.431067423916667
CRLF3	0.430957137166664
DAPP1	0.430865521083332
S100A13	0.430865
UPF1	0.430779868166665
RGS9BP	0.430508775916666
B3GNT8	0.430474621000002
ATP6V0E1	0.430437641666671
TNFRSF21	0.430355430833334
MYH15	0.430179600083332
DNAJC15	0.430037
CAMKV	0.429937701833334
CLTB	0.429862128166665
UBAP1	0.429783525833333
HS3ST2	0.429640843333334
GPRC5C	0.428787855000001
LAMA4	0.428623103833329
STOM	0.428346710000003
CDIPT	0.428146886416668
SLC8A1	0.428102353749999
CCK	0.427891
TLCD1	0.427699414416667
RHBDF1	0.427562457666665
MCCC2	0.427321243249999
EDA	0.427205714750002
ANKRD62	0.427190926416667
SLC35D2	0.426708765083337
OLFML2B	0.426540998583336
MUC21	0.42643
PEBP4	0.426139662583337
KRT33A	0.426118017499999
BATF	0.425879298750001
SV2C	0.425765049249999
PABPN1L	0.425718667749999
TNFAIP2	0.425652493333335
VCAM1	0.425597769666665
SLC9A1	0.425568419666667
LPCAT1	0.425479135916668
PEX16	0.424981109166668
SLC4A7	0.424808429333334
PPP2R5B	0.424701039666665
BTBD17	0.423167181749999
GAP43	0.422956
PLEKHM1	0.422867284166664
COL9A2	0.422830399833333
MAP7D1	0.422713168333333
BFSP2	0.422700354916667
ZXDC	0.422599
NBEAL2	0.422545603666668
TMED5	0.42250831666667
SORD	0.422377255000002
HSPA1B	0.422256434999996
STRADB	0.422123645416667
ALDH8A1	0.422087
MME	0.422083297249999
CASZ1	0.421678422333333
CACNA1F	0.421587912749999
SESTD1	0.421529378250002
RTN4RL2	0.421444439916668
YIF1B	0.421416786583331
TAC3	0.421351620166667
AASS	0.421285508583335
DPPA4	0.421267183833334
TRIM29	0.421196857416668
SLC16A10	0.421159396666667
MPZL2	0.42094231916667
COL25A1	0.420872256833332
SSC5D	0.420615289583333
GAB4	0.420278295916668
DPYSL2	0.420231535833331
TES	0.420117312250003
XBP1	0.419960938333332
PRICKLE3	0.419892634666668
OR2V2	0.419575431749999
STMN4	0.419415743749999
CETP	0.419356519916666
MEGF10	0.419289791416665
TMC6	0.418746749166667
HSPB2	0.418308
ZNF662	0.418245714000001
ANKRD44	0.417825662416666
WASF2	0.417715694249999
RABAC1	0.417146739166668
SLC2A5	0.416774006833333
KLK10	0.416755853083333
EDEM2	0.41660966658333
TMEM59L	0.415960216749999
RASGRP3	0.415621
SPOCK1	0.415529854499999
LDHA	0.415522266666667
CBR1	0.415131659166668
DUSP5	0.415003740916666
PPP1R13L	0.414834
SNX29	0.414829279166666
G6PC2	0.414744420083333
ZYX	0.413806986666664
FGF14	0.413723665666665
DSP	0.41343
STIM1	0.413172267499998
CNTN6	0.412908885666665
FILIP1	0.412365
PMM1	0.412204108333329
LAMTOR1	0.411998205833333
RAB9A	0.411454402499999
ILK	0.411301185000003
UBE2E1	0.411055
SLC16A6	0.411009237333333
CETN1	0.410924
GPI	0.410839997500004
SCG3	0.410720610416667
TNFRSF8	0.410342772750003
CCDC116	0.410324518666664
RTP1	0.410314504499999
LNX2	0.410282492583331
LGI1	0.410249396416667
NKG7	0.410171853833335
FGGY	0.410144078333332
FAM151A	0.410076848999999
SLC5A11	0.409965284083335
YARS2	0.409875163333332
ABI3BP	0.409837921583337
ADAM21	0.409579294916665
SIGLEC9	0.409176
IL10RB	0.408957491916668
CLDN24	0.408896242000001
PSMA8	0.408844288250001
IL15	0.408791076916668
HBE1	0.408297183999999
MAFF	0.408069077249998
PNMA3	0.408050735166666
GALNS	0.408007914666669
THEM5	0.407943394166666
AGK	0.407936763333334
LEPROT	0.407809276666669
BAIAP2	0.407771175666667
RABGAP1	0.407758793083335
CSRNP1	0.407078906166669
LPAR3	0.406775643333333
SLC17A9	0.406228591833333
EFHD1	0.406099032916666
CDYL	0.405653108333331
CASKIN1	0.405517433333332
ENPP5	0.405270688666667
HIBADH	0.404711635833333
AHR	0.404599936666671
TBCK	0.404296148916663
WLS	0.404075504166666
MBOAT2	0.404048264833332
CHST7	0.403732
ATP6V1B1	0.403719097750001
SLC3A2	0.403528684333338
SLC29A1	0.403272947500001
LAMP2	0.403158212500003
MAP3K9	0.403128673499999
LGALS3BP	0.403103502499999
NUDT16	0.403052732166667
MAP2K1	0.402996626916664
PWWP2B	0.402891613333335
LY6G6C	0.402476623416665
DHRS7	0.402103339999998
EIF4E3	0.401780732499999
TRIM48	0.401636390249999
MFGE8	0.401623457249999
SSH3	0.401410015916668
HES2	0.401284957249998
CDYL2	0.401227368083333
GSTM3	0.401152464166669
RFK	0.400979275000003
SIPA1L2	0.400571813166666
CBR3	0.400547399416666
SHROOM3	0.400277165833332
RAB5B	0.400114960750001
SRMS	0.399709153999999
OR10G2	0.398581237333334
APOO	0.398386414166666
LONRF1	0.398027330416665
RTN3	0.397967692416671
HIGD1A	0.397740488333334
MAP7D2	0.397323439249999
SAT1	0.397264809166664
ENTPD6	0.397225362499997
ADRA1D	0.397197
FAM131A	0.397085175833335
WDR17	0.397031105666665
GLE1	0.396921460166666
SLC25A47	0.396908175416667
GPT	0.396407161166667
HAS2	0.396171134250001
KIF1A	0.396088399666668
TP53I3	0.395812118333334
CERS2	0.395525093333333
CHIA	0.395408613083337
NFKB2	0.395298669916666
DNASE2B	0.395256172666667
PGK1	0.394988709166666
NNT	0.394876849083333
DUSP22	0.394733302166665
MOV10L1	0.394687291249999
RNASET2	0.394576128333334
LMCD1	0.394561815833335
CYP26C1	0.394418694500001
SH2D2A	0.394323917000003
MYH8	0.394112930249999
COL6A2	0.393955
PLCG2	0.393053477583333
PCDHB8	0.393008437916667
HSPB7	0.392995862166668
VAMP8	0.392957056666663
TMEM43	0.392823
DCAF4L2	0.392673591666668
GPR20	0.392506253083331
OR1J4	0.392286616916668
TMEM115	0.392198034166665
SAR1B	0.39218118416667
GRID2IP	0.391905998249999
CD68	0.391714429749998
SPTLC3	0.391689196916669
CLIP4	0.391384563166667
F2RL2	0.391237838833334
CHURC1	0.391207298916664
EPO	0.390814902250002
UBE2B	0.390773252583333
NAPA	0.390744238583332
GNRH2	0.390543814833333
PIGG	0.390499705000002
DPT	0.390419077666667
PXMP4	0.389536063666664
APOE	0.388555193333328
PHYH	0.388379781166671
DUSP8	0.388356299166666
ANTXR2	0.388230535833333
HSPB1	0.387897944999999
NR2F1	0.387849026666666
NKX2-2	0.387704453916668
PRDM2	0.387604
RFPL4A	0.387489556666666
GFOD1	0.387310362749998
INPP4B	0.386942446583337
PCDH15	0.386922123083332
INPP5K	0.386703405833336
MYL6	0.386645210833338
FKBP8	0.386382380833332
CBX8	0.385875
CD177	0.385813238500001
SLC6A15	0.385541930083333
NDUFA4L2	0.385404636250001
GOT1	0.385131966666664
CNDP2	0.385083384999998
SLC35A3	0.384795879583335
PLS3	0.384636935000003
CNKSR1	0.384597185583333
UNC13A	0.384563150583332
OSTM1	0.384425272583333
STEAP1	0.384285336833331
SLC44A1	0.384068046666666
TNK1	0.383966542750004
FMNL1	0.383957
TLN1	0.383881536083333
LGR5	0.383849624583332
TM9SF2	0.383819
TMEM191B	0.383673
RASAL1	0.383405413916668
PPP1R27	0.382493512416667
NPNT	0.382382153583334
IGSF21	0.382005894833333
BCAR3	0.381932671916669
SCN3B	0.381282627500002
LRRIQ4	0.381008715083333
SERPINF1	0.38064159583333
CYP4F2	0.380614663666666
CDK2AP2	0.380402521666667
NTRK2	0.380359729916666
TRIML2	0.380195
ABHD4	0.379907045999996
PDE4B	0.379691258499998
MAOB	0.379586216000003
TMEM79	0.379501881166668
SPRR2F	0.379118880249999
SLC45A4	0.379100275999999
BST1	0.37903
NUCB1	0.378798540500002
OR2A25	0.378691513416666
OR52E6	0.378554893083334
KRT15	0.378196
KIAA0513	0.378007373333331
CALCOCO1	0.377769759083334
SLC25A29	0.377563973333331
SEC23B	0.377510695833335
TLCD2	0.377465098500001
KLF8	0.377079343166667
OR52D1	0.37705
UNC13B	0.376846941166667
DDA1	0.376647786083334
RAPGEF5	0.376213264166668
ATP6AP2	0.376135756666669
TPST2	0.376132693333332
WDR72	0.375524607666666
DLG5	0.375468487083339
JAK1	0.375371936916665
TUBB3	0.375319080833336
FOXQ1	0.375165377333333
SPINK14	0.375163187249999
POMZP3	0.375162879083335
TFPI	0.374654839833337
SNX15	0.374653187666665
CLEC2A	0.374537177083333
DAPK1	0.374515194333332
PNPLA6	0.37450522641667
CDCP1	0.374477338833332
TBX1	0.374469
CDH23	0.374401208333332
PEX11A	0.374303667666668
MANSC1	0.374224102166664
TTLL12	0.374159939166667
KIFC2	0.374114805250001
PCDH1	0.374096379166668
GBP1	0.373927290750004
WDR13	0.373843250833332
SPATA24	0.373719348416667
MRPS2	0.373682983333332
FAM180B	0.373467299583334
C6orf136	0.372894929500001
SHROOM1	0.372634454916667
PAPPA	0.372536376583335
WDTC1	0.372535113499999
WWP2	0.372521021583333
HNF4A	0.372433703000002
TRDN	0.372358830666665
KLHL26	0.372054339416669
GUCA2B	0.372050942499999
A2M	0.371890910833335
KCNQ3	0.371862466166665
TSPAN2	0.371676850916666
RAB40C	0.371662457916671
INA	0.371648808666666
LPL	0.371538736000002
INO80B	0.371266125166668
TFIP11	0.371003350083337
SEC11C	0.370994679166667
FAAH2	0.370815763166664
ROGDI	0.370613494833332
LCN15	0.370574249666666
SLC34A2	0.370526995833332
OR51S1	0.370416451416667
USP47	0.370366750833337
ALOX5	0.370250820916663
PMEL	0.370170242749999
ORMDL2	0.370160739166664
ACP2	0.370047017416667
ARID5A	0.369804014083336
OR1S1	0.369586343916668
GSPT1	0.369428469666666
LIPK	0.368947214416668
CNDP1	0.368799052833332
PEA15	0.368738
A1CF	0.368735832916667
WDR45	0.368699
MACC1	0.368578654666666
RAB3A	0.368494905166666
TBX5	0.368473254666667
GCNT2	0.368451662749999
EDN1	0.36828956658333
TFPI2	0.368265390833336
TRAPPC3	0.367876615833339
NOX1	0.367864587250002
PSG3	0.367424563416668
PTPRE	0.367365336833332
ZNF185	0.367363061666666
NCOA7	0.367102935083331
SYT14	0.367027
APOBEC2	0.366753055666667
CALML6	0.366645569416668
TEX261	0.366093481249999
PFN1	0.366060469999995
ENTPD5	0.366003395500003
INSM1	0.365990513583333
DOC2B	0.365753340833335
LGI4	0.365354557916667
POLN	0.365140694416668
DHRS7C	0.36508
SLC9A3R2	0.36498397058333
ISY1-RAB43	0.364822695750002
FAM3A	0.364680185499999
AIFM3	0.364611904833334
PLXNB3	0.364314297333333
SLC16A14	0.364117504416667
LCN6	0.363832106583335
SFXN3	0.363815224249999
OR8B8	0.363778134999998
TTLL2	0.363528613083334
ETS2	0.363413344083332
ZNF648	0.363312026416667
TTC21A	0.363302926916665
RABGGTA	0.363226033833334
ZSWIM3	0.363134742166668
CIB1	0.363109889166669
OTUB2	0.363046528166667
C7orf31	0.362828659249999
SAR1A	0.362584005833332
GREM1	0.362533088166667
NUDT13	0.362400697000001
HIPK3	0.362277152499999
SERINC5	0.362188737749998
YWHAH	0.362053559166668
CSAG2	0.361889396833334
IZUMO4	0.361795626083333
FBLN2	0.361750896999999
VPS52	0.361745100666665
FITM2	0.361574225166668
ATP6V0A1	0.361289
ABHD12B	0.361287275083334
CAPN10	0.361210246750002
TRIM47	0.361124817499999
VAT1L	0.36103486516667
PDZD2	0.360757
GLUD2	0.360611594083336
BMP5	0.360345
FOXP1	0.360279181666671
PALMD	0.360183936750003
FAM167A	0.360169667916668
VWA5A	0.360130727833333
FGD4	0.359745346583333
IGFBP4	0.359473731583334
SLC2A3	0.359450972333334
SRPK3	0.359370920249999
RAB11A	0.359194477666669
SLC43A2	0.359099344916665
ACOT8	0.358970812166666
FSD2	0.358852620333333
ANPEP	0.358732289416664
EEF1A2	0.358650681249998
PRKACB	0.358583897666666
FGFRL1	0.358550287499995
RPS4Y1	0.358462512583334
KNG1	0.358418932083333
KCP	0.358388583583334
NR1H2	0.358228092500001
MAP2	0.358058236249999
RNF17	0.357892942749999
DPH3	0.357722264166664
DPP7	0.357643674166667
ARHGEF35	0.357472143083333
IL2RB	0.357463670333329
MAPK14	0.357458622416665
RASD2	0.357155588000001
MEGF6	0.356944801249999
TGM1	0.356835829000002
FAIM	0.356633818333332
CST2	0.356625673166666
SPINT2	0.356613737500002
SLC26A3	0.356536578333334
FOXA3	0.356532771416667
ZBTB10	0.356475720500002
LASP1	0.356318689166661
SSBP3	0.356282
CHRM4	0.356126394916667
GADD45B	0.355956690833333
NLRP10	0.355755
TTC26	0.355649979666664
PPP3CC	0.355606594083334
APBB1	0.355404305333334
MYH14	0.355119296583329
SPRYD3	0.355033766666663
SEZ6	0.354958173999999
BBOX1	0.354910119666665
HS3ST3A1	0.354791058999998
MTRNR2L3	0.354710473083332
SERTAD1	0.354566396666664
JMJD7	0.354495162749998
FLT3LG	0.354234973250001
CPNE2	0.354208563333332
SLC44A2	0.35370218833333
GJB2	0.353454853333334
DYNLRB1	0.35339803583333
MUC1	0.353249912666664
IL19	0.353044425666667
SLC1A6	0.352903193999999
CEP104	0.352779558000002
RBL2	0.352735588333335
MMP9	0.352310162083335
BTD	0.352266003666665
CDKN2B	0.351804372999999
TMEM151A	0.351605663166666
CLU	0.351432435249999
KLK9	0.351294457000003
ABCD1	0.351145112333333
ACOXL	0.351126
AGPAT3	0.351080341166668
CST1	0.350449425583333
SLC48A1	0.350430157500002
RCVRN	0.350221168750001
GSTM1	0.34972027308333
ZNF577	0.34965348808333
ATP11A	0.349602780000001
FURIN	0.349296717083332
AUH	0.349210051583331
HS1BP3	0.349172388333335
CKMT2	0.349155185583333
HAGH	0.349077252500001
HAVCR1	0.349013449916666
C3orf20	0.348995301416666
KAAG1	0.348646522333333
ATP2C2	0.348582068916665
MYL12A	0.348531582499998
PDZD9	0.348498935749999
BSPRY	0.348344054999998
FYCO1	0.348135028333331
MEF2A	0.348032066666669
PRKX	0.347904891416666
ACTN1	0.347427350833335
NMNAT2	0.347176089999999
MZB1	0.346808776583336
SIRPG	0.346604284916666
GLYAT	0.346565363083333
PFDN1	0.346439402500003
C14orf180	0.346432844666667
LCE1A	0.346329989166669
NR3C2	0.346179261833332
FIBIN	0.346129290333335
GBA2	0.345750654499998
REXO2	0.345571
DLL4	0.345103262166665
OR8G5	0.345000733166666
COMMD7	0.344957061166667
KRTAP10-7	0.344630775416666
P2RY10	0.344476452666665
PCDH12	0.344471028583332
FAM3C	0.344397214166667
REXO1	0.344382269166667
MCOLN2	0.344165803499999
TRIOBP	0.343750512833331
ERBB2	0.343735994166666
CDK8	0.34370810508333
CDH19	0.343602231166666
NPSR1	0.343544591500001
LIMA1	0.343038202499999
SYNPR	0.342977619583333
CRP	0.342734164583334
FAM83H	0.342533799916668
PLEKHH1	0.342524931999998
ADRM1	0.342339158333337
SF3B4	0.342164056833334
OAS1	0.342136284666664
CD47	0.342112030000001
ATP6V1E1	0.341987829166664
OCLN	0.341954829333332
TBC1D17	0.341934519583329
NDEL1	0.341808984166668
MMP19	0.341802464000002
TAF6L	0.341529506666671
COL1A2	0.341236531666667
ADIPOR1	0.341200774166664
SLC7A6	0.340883
SIRT7	0.340557646249998
VWA1	0.340398894166665
ABO	0.340362632750001
SLC35F1	0.340275673583332
CLEC12A	0.340163163666666
PHEX	0.339986140083335
KLF9	0.339726517499997
WDR91	0.339622779166664
PSME3	0.339441290833332
METTL21C	0.339383539000001
ELK4	0.338966076999997
WDR87	0.338947053666666
SFTPD	0.338941509250001
HAPLN3	0.338838462833332
VPS25	0.338794423333331
RXRB	0.338613073666663
SPTSSB	0.338426303583334
PRSS36	0.338413061083333
TMEM163	0.338296107083334
LGALS12	0.338219283000001
APBA1	0.337877050000001
CYP2E1	0.337874095916665
BCL2L1	0.337844
RHOC	0.337666089999999
SESN2	0.337551
ESM1	0.337128245416666
C1QL3	0.336915105833333
GBX1	0.336828763333332
PRR23C	0.336821
SLC25A42	0.336679471833337
ABHD10	0.336662690249998
MPV17L2	0.336530535833331
OR2B3	0.336428
SOX15	0.336296673583334
TUBA1A	0.336274898333334
GCHFR	0.336146433333331
PCP4L1	0.336036875333333
RSPH6A	0.336011556166667
CYB5R2	0.335976706666671
CSPG5	0.335844477916665
PINK1	0.335608154166669
RCE1	0.335552
CCPG1	0.335445460333331
CLDN1	0.335311
LMO2	0.335300024166667
ELF3	0.335275865833331
NAGK	0.335269248333333
ALDOA	0.335211965000001
FA2H	0.335182318916667
ZDHHC23	0.335159443916664
UTS2R	0.335086838333329
DPP4	0.334982991166664
GABBR2	0.334823176666665
CTSB	0.334635
AFAP1L2	0.334499153333333
OGDH	0.334401112250002
RSU1	0.334140322750001
SERPINE1	0.334090844916667
IL25	0.334047818833334
MRPL46	0.333796549166665
SLC22A9	0.333766544166666
CCNI2	0.333453533249999
GNG5	0.333417852500002
IL36B	0.333296899583332
SNCB	0.333246
GMPPA	0.333029664833333
DHH	0.332553250083333
ROM1	0.332539744583336
ELP3	0.332446920000004
IRAK4	0.332395064249999
OR52N4	0.332131406333333
CMPK1	0.331931
ZDHHC18	0.331883899833331
DDX53	0.331533243249998
CYB5R4	0.331369774416668
HSD3B7	0.331222155333334
OCIAD2	0.331179071666664
PSME4	0.331120133499999
PARD6A	0.331032199999998
SLC14A1	0.331025425583334
BLVRA	0.330971374166669
RPUSD3	0.330956259250001
PTPRM	0.33086415033333
ABCF2	0.330755534750004
ADIPOR2	0.330490299166668
DNAJC5G	0.330228748166665
HOXD13	0.330095965333334
HTRA4	0.329979243666667
KRTAP10-3	0.329903321500001
IFI35	0.329881397833333
DDT	0.329746440833338
SLC26A9	0.329729343083333
TMEM184A	0.329671497333334
INHBC	0.329562165166666
KCNC4	0.329535721083337
ZNF607	0.329485712499997
AASDHPPT	0.329462
PHOX2A	0.329296263500001
KRTAP10-12	0.328996
ATP1B4	0.328666849083334
PRRT1	0.32844
KLF5	0.328338887500003
BLK	0.328265
GFI1B	0.328250883666667
MAPK13	0.328222378333333
DERA	0.328031924166668
CLSTN2	0.327910854749997
ARSF	0.327692434499999
SPSB4	0.32766207766667
OLIG3	0.327648
PKN1	0.327472
MINK1	0.326961663916667
GTSF1	0.326526014666666
MRC1	0.326329741583333
ZDHHC3	0.326221262500002
RDH10	0.326214121999994
ANKRD13A	0.325985217666663
IRS2	0.325982414666667
KRT81	0.325938975833337
BMP10	0.325558823916667
USH2A	0.325234057166667
NTRK1	0.325135333666667
APBA3	0.32505921991667
RNF167	0.324778474999999
CPNE4	0.324736527083334
GSN	0.324595259166665
MCTP1	0.324550968000001
PRKCSH	0.324482488416663
SPINK6	0.324329741333334
HK1	0.324241038333339
KRTAP19-1	0.324153659666666
SCAF8	0.324117525833335
KCNK18	0.323559084250001
KCNK4	0.323549448749999
SDHAF2	0.323137792500004
PPP1R15A	0.323063508416666
MFSD5	0.323015249166666
ASB16	0.322911973666667
SMAP2	0.322753977416664
LPIN1	0.322604982499998
ZNF787	0.322106358500001
IFI30	0.321944265000001
PRKAR1B	0.321672572833333
PPARGC1A	0.321465
ULK1	0.321356236333333
TTC21B	0.321330059416665
MMRN2	0.321329
EPB41L5	0.321259776250001
ESAM	0.321100011416669
CNPY1	0.321008208499999
APLP2	0.320698310833334
TSGA13	0.320656624166666
CCL3	0.320645288583332
A4GALT	0.320640076666667
PAH	0.320538575833333
SERTAD3	0.320507866666667
FAM167B	0.320375230499998
LTBP3	0.320345166666668
LAPTM5	0.320341820833336
SLX1A	0.319812310833333
GGT6	0.319689086666664
AP3S2	0.319577
KLHL4	0.319533381916667
GABRE	0.319367900833335
TMC7	0.319267947249998
PLVAP	0.31926248041667
CDH13	0.319240913666668
C10orf71	0.319194403833333
DGKQ	0.319121788916668
MYO10	0.319061391416668
MAT2B	0.318938782499995
SRRM3	0.318928625000002
EML3	0.31889
RPS6KA4	0.318841
ERN1	0.318760154250001
CCL2	0.318757468833335
STRA8	0.318565
OR5W2	0.318557589250001
CD46	0.318421530249999
CRIP1	0.318280893333334
ERN2	0.318151014416669
MAPK1	0.31801911183333
TMEM191C	0.317849466666666
ANKHD1	0.317844956166667
SPNS1	0.317562259416668
TRMU	0.317539799666669
LYPD6B	0.31748
SLK	0.317215947416665
NEUROD4	0.317086752250001
PIEZO2	0.316995312750001
ABCA4	0.316934648666666
FRMPD1	0.316891673166666
BCL3	0.31657451666667
RNF121	0.316459772916666
CD7	0.316337
FAS	0.316159789833332
CLCC1	0.316144107083336
TAF13	0.316127431750003
AGFG1	0.315867556416666
KLHL30	0.315811424833334
EMX1	0.315718960083333
ANGPTL5	0.315492083583334
ZFAND2A	0.315491
PRAMEF19	0.315461
CHRNA6	0.315320419916667
MAL2	0.315290154166664
POF1B	0.315191745833334
POLD4	0.314930922499995
DTNB	0.314832466083334
SLC22A23	0.31460233783333
MGST2	0.314540043333331
NUCB2	0.314455125833332
STX19	0.314412082166669
NGB	0.314314397249997
GAL3ST4	0.314086752416666
LPA	0.314070154333334
SNX30	0.313869372500003
SLC17A2	0.313792754166667
USP25	0.313704031833336
NHSL1	0.313632650249999
FER1L5	0.313574572833335
FKBP1A	0.313320728333334
NDUFA3	0.313265507500001
BSN	0.313145273000001
MRGPRD	0.312963
SGCA	0.312856953416666
HORMAD1	0.312852420333336
EPHA6	0.312809
RBM38	0.312444806000002
SLC1A2	0.312436396833331
OR4F4	0.312423500166667
OR2W1	0.312407524499999
WNK4	0.312052474083335
SULF1	0.311730741833331
PLA2G15	0.311543732500001
GABRA4	0.311395761500001
OR51F2	0.311159304333334
FXR2	0.311114444083331
PEF1	0.311056556666665
CDC42BPG	0.310974838666668
HIF1AN	0.310938994916667
PRRG2	0.310791768250001
KCNA4	0.310702026166667
FAM9C	0.310611299750001
TMEM134	0.310506131666664
KLHDC7B	0.310476886083333
KDM6B	0.310470505416665
CGREF1	0.310383427250001
OPN1SW	0.310313345666667
ELMO3	0.310281
ANGPT1	0.310107215166669
OR7C1	0.309979611166665
ABCA5	0.309964557750003
MSMO1	0.309923940166669
ATN1	0.30988949541667
OR10Z1	0.309761192166667
MYOC	0.309742775250003
RHOB	0.309641355833334
ICA1	0.30952
HOOK2	0.309519113083329
CSGALNACT1	0.309386038166666
BRSK1	0.309365683750001
ZNF586	0.309361585333334
PTGDR	0.309320929666669
PACSIN3	0.309124493333334
ZMAT5	0.308968970916666
F2RL1	0.308964130916666
TTC39B	0.308962510333332
HARBI1	0.308849619583334
ATP2C1	0.308772278333334
MAP3K5	0.308565965583334
SPO11	0.308482303583333
PSORS1C2	0.308459332583332
SEL1L2	0.308399553666665
LIN7A	0.308226
LCE1C	0.308147980833331
ARSA	0.307904939166665
OR52N5	0.307897
TNFSF9	0.307878202749999
RSC1A1	0.307801377999995
RRAGC	0.307727075833331
FAM135A	0.307685830250001
BAIAP2L1	0.307594448083334
WNT5B	0.307559871000002
PIGZ	0.307474931083332
LMAN2	0.307403
FBXL17	0.307354662083331
RNF19A	0.307150624666665
ABHD3	0.307060834750001
NUPR1	0.306977051666673
SIDT1	0.30684073066667
LARP1B	0.306765140416672
TLR5	0.306754551083337
ST6GAL1	0.306663748333333
CXXC5	0.306357004999995
NKIRAS2	0.306341614999999
DDO	0.306340167333333
CAPN1	0.306300581666669
NACC2	0.306286371416665
NIT1	0.306235277083331
ERAL1	0.306229090416666
CAMTA2	0.306183193666666
C10orf62	0.305914582416666
KLHDC3	0.305488888166668
GRAMD1A	0.305247153416667
TSPO	0.305127189166663
HUS1	0.304916354999998
CPLX2	0.304914905500001
SCGB3A2	0.304628371333333
TSPAN13	0.304529342166667
TACR2	0.304202795333333
OTC	0.304181866166667
NKIRAS1	0.30417608283333
DIAPH1	0.303840790000001
UBXN6	0.303488198916668
[truncated: 14,745 more rows]
