# Supplementary material for: Identification of hypoxia- and mitochondria-related genes associated with recurrent spontaneous abortion: an integrative bioinformatics analysis and preliminary validation
Source: PeerJ journal article supplement (doi:10.7717/peerj.20467), 2025-12-19
Supplement: Supplementary_Table_3.xlsx [file Supplementary_Table_3.xlsx]

## Sheet: c5.go.v2023.2.Hs.symbols
Supplementary Table 3 Specific information related to the background gene set (c5.go.v2023.2.Hs.symbols.gmt)
GO	Wibesite	Gene list
GOBP_10_FORMYLTETRAHYDROFOLATE_METABOLIC_PROCESS	https://www.gsea-msigdb.org/gsea/msigdb/human/geneset/GOBP_10_FORMYLTETRAHYDROFOLATE_METABOLIC_PROCESS	AASDHPPT	ALDH1L1	ALDH1L2	MTHFD1	MTHFD1L	MTHFD2L
GOBP_2FE_2S_CLUSTER_ASSEMBLY	https://www.gsea-msigdb.org/gsea/msigdb/human/geneset/GOBP_2FE_2S_CLUSTER_ASSEMBLY	BOLA2	BOLA2B	FDX2	FXN	GLRX3	GLRX5	HSCB	ISCU	LYRM4	NDUFAB1	NFS1
GOBP_2_OXOGLUTARATE_METABOLIC_PROCESS	https://www.gsea-msigdb.org/gsea/msigdb/human/geneset/GOBP_2_OXOGLUTARATE_METABOLIC_PROCESS	AADAT	ADHFE1	D2HGDH	DLST	GOT1	GOT2	GPT2	IDH1	IDH2	KYAT3	L2HGDH	MRPS36	OGDH	OGDHL	PHYH	TAT
GOBP_3_PHOSPHOADENOSINE_5_PHOSPHOSULFATE_METABOLIC_PROCESS	https://www.gsea-msigdb.org/gsea/msigdb/human/geneset/GOBP_3_PHOSPHOADENOSINE_5_PHOSPHOSULFATE_METABOLIC_PROCESS	ABHD14B	BPNT1	ENPP1	PAPSS1	PAPSS2	SULT1A1	SULT1A2	SULT1A3	SULT1A4	SULT1B1	SULT1C3	SULT1C4	SULT1E1	SULT2A1	SULT2B1	TPST1	TPST2
GOBP_3_UTR_MEDIATED_MRNA_DESTABILIZATION	https://www.gsea-msigdb.org/gsea/msigdb/human/geneset/GOBP_3_UTR_MEDIATED_MRNA_DESTABILIZATION	CPEB3	DHX36	DND1	HNRNPD	KHSRP	MOV10	PLEKHN1	PUM1	PUM2	RBM24	RC3H1	TARDBP	TRIM71	UPF1	ZC3H12A	ZC3H12D	ZFP36	ZFP36L1	ZFP36L2
GOBP_3_UTR_MEDIATED_MRNA_STABILIZATION	https://www.gsea-msigdb.org/gsea/msigdb/human/geneset/GOBP_3_UTR_MEDIATED_MRNA_STABILIZATION	ANGEL2	BOLL	DAZ1	DAZ2	DAZ3	DAZ4	DAZL	ELAVL1	ELAVL4	HNRNPA0	HNRNPC	LARP4B	MAPK14	MAPKAPK2	METTL16	MYD88	RBM10	RBM24	RBM47	TARDBP	TENT4A	TENT4B	TIRAP	YBX3	ZFP36
GOBP_4FE_4S_CLUSTER_ASSEMBLY	https://www.gsea-msigdb.org/gsea/msigdb/human/geneset/GOBP_4FE_4S_CLUSTER_ASSEMBLY	FDX2	FXN	ISCU	LYRM4	NFS1
GOBP_5S_CLASS_RRNA_TRANSCRIPTION_BY_RNA_POLYMERASE_III	https://www.gsea-msigdb.org/gsea/msigdb/human/geneset/GOBP_5S_CLASS_RRNA_TRANSCRIPTION_BY_RNA_POLYMERASE_III	GTF3C1	GTF3C2	GTF3C3	GTF3C4	GTF3C5	GTF3C6
GOBP_5_PHOSPHORIBOSE_1_DIPHOSPHATE_METABOLIC_PROCESS	https://www.gsea-msigdb.org/gsea/msigdb/human/geneset/GOBP_5_PHOSPHORIBOSE_1_DIPHOSPHATE_METABOLIC_PROCESS	PRPS1	PRPS1L1	PRPS2	PRPSAP1	PRPSAP2	PYGL
GOBP_7_METHYLGUANOSINE_CAP_HYPERMETHYLATION	https://www.gsea-msigdb.org/gsea/msigdb/human/geneset/GOBP_7_METHYLGUANOSINE_CAP_HYPERMETHYLATION	SNRPB	SNRPD1	SNRPD2	SNRPD3	SNRPE	SNRPF	SNRPG	TGS1
GOBP_7_METHYLGUANOSINE_RNA_CAPPING	https://www.gsea-msigdb.org/gsea/msigdb/human/geneset/GOBP_7_METHYLGUANOSINE_RNA_CAPPING	CMTR1	CMTR2	NCBP1	NCBP3	RAMAC	RAMACL	RNGTT	RNMT	TGS1
GOBP_ABSCISSION	https://www.gsea-msigdb.org/gsea/msigdb/human/geneset/GOBP_ABSCISSION	AURKB	CHMP4C	IST1	SPART	VPS4A	ZFYVE19
GOBP_ACETATE_ESTER_METABOLIC_PROCESS	https://www.gsea-msigdb.org/gsea/msigdb/human/geneset/GOBP_ACETATE_ESTER_METABOLIC_PROCESS	ACHE	BCHE	CHAT	COLQ	SLC44A4	SLC5A7
GOBP_ACETATE_ESTER_TRANSPORT	https://www.gsea-msigdb.org/gsea/msigdb/human/geneset/GOBP_ACETATE_ESTER_TRANSPORT	ADORA2A	CHRNA3	SLC17A8	SLC18A3	SLC22A1	SLC22A2	SLC22A4	SLC44A4	TACR2
GOBP_ACETYLCHOLINE_SECRETION	https://www.gsea-msigdb.org/gsea/msigdb/human/geneset/GOBP_ACETYLCHOLINE_SECRETION	ADORA2A	CHRNA3	SLC18A3	SLC44A4	TACR2
GOBP_ACETYL_COA_BIOSYNTHETIC_PROCESS	https://www.gsea-msigdb.org/gsea/msigdb/human/geneset/GOBP_ACETYL_COA_BIOSYNTHETIC_PROCESS	ACAT1	ACLY	ACSS1	ACSS2	DIP2A	DLAT	DLD	MLYCD	MPC2	PDHA1	PDHA2	PDHB	PDHX	PDK1	PDK2	PDK3	PDK4	PPCS
GOBP_ACETYL_COA_BIOSYNTHETIC_PROCESS_FROM_PYRUVATE	https://www.gsea-msigdb.org/gsea/msigdb/human/geneset/GOBP_ACETYL_COA_BIOSYNTHETIC_PROCESS_FROM_PYRUVATE	DLAT	DLD	MPC2	PDHA1	PDHA2	PDHB	PDHX	PDK1	PDK2	PDK3	PDK4
GOBP_ACETYL_COA_METABOLIC_PROCESS	https://www.gsea-msigdb.org/gsea/msigdb/human/geneset/GOBP_ACETYL_COA_METABOLIC_PROCESS	AADAT	AASS	ACACA	ACACB	ACAT1	ACLY	ACOT12	ACSS1	ACSS2	DIP2A	DLAT	DLD	DLST	HMGCS1	HMGCS2	MLYCD	MPC2	MVD	MVK	NUDT7	NUDT8	PDHA1	PDHA2	PDHB	PDHX	PDK1	PDK2	PDK3	PDK4	PIPOX	PMVK	PPCS	TDO2
GOBP_ACIDIC_AMINO_ACID_TRANSPORT	https://www.gsea-msigdb.org/gsea/msigdb/human/geneset/GOBP_ACIDIC_AMINO_ACID_TRANSPORT	ABAT	ABCC8	ADORA1	ADORA2A	APBA1	ARL6IP1	ARL6IP5	ATP1A2	AVP	AVPR1A	CLN8	DTNBP1	GABBR1	GIPC1	GJA1	GNAT2	GRM1	GRM2	GRM7	HRH3	ITGB1	KCNJ10	KCNJ8	KMO	NF1	NHERF1	NPY5R	NTRK2	NTSR1	P2RX7	PER2	PRAF2	PRKG1	PSEN1	RAB3GAP1	SLC12A2	SLC17A6	SLC17A7	SLC17A8	SLC1A1	SLC1A2	SLC1A3	SLC1A4	SLC1A6	SLC1A7	SLC25A12	SLC25A13	SLC25A18
GOBP_ACID_SECRETION	https://www.gsea-msigdb.org/gsea/msigdb/human/geneset/GOBP_ACID_SECRETION	ABAT	ABCB11	ABCB4	AGXT	APBA1	CACNB4	CASR	CCKBR	CES1	CHRM5	DRD2	DRD3	GABBR1	GHRL	HIP1R	HRH2	HTR1B	KCNQ1	MIR33A	NF1	NHERF1	NTSR1	P2RX7	PRKAA1	PTGER3	SCT	SGK1	SLC10A1	SLC22A16	SLC26A6	SLC26A7	SLC51A	SLC51B	SLC6A1	SLC9A4	SNX10	SV2A	TFF2	TNF	TRH	TRPC4	UGT1A3	UMOD
GOBP_ACINAR_CELL_DIFFERENTIATION	https://www.gsea-msigdb.org/gsea/msigdb/human/geneset/GOBP_ACINAR_CELL_DIFFERENTIATION	CLCN2	CTNNB1	NR5A2	PROX1	ZNF800
GOBP_ACROSOMAL_VESICLE_EXOCYTOSIS	https://www.gsea-msigdb.org/gsea/msigdb/human/geneset/GOBP_ACROSOMAL_VESICLE_EXOCYTOSIS	EQTN	HYAL3	RAB3A	RIMS1	STXBP1	SYT6	UNC13B	ZP3	ZP4
GOBP_ACROSOME_ASSEMBLY	https://www.gsea-msigdb.org/gsea/msigdb/human/geneset/GOBP_ACROSOME_ASSEMBLY	ACRBP	ACTL7A	ACTL9	AGFG1	CCDC136	CCDC42	GARIN1A	GARIN1B	KNL1	MFSD14A	NECTIN2	PAFAH1B1	PFN4	PLA2G3	PLN	RFX2	SLC9A8	SOX30	SPACA1	SPINK2	SPPL2C	TBC1D20	TBPL1	TMF1	VPS13B	ZPBP	ZPBP2
GOBP_ACROSOME_REACTION	https://www.gsea-msigdb.org/gsea/msigdb/human/geneset/GOBP_ACROSOME_REACTION	ABHD2	ACR	ADCY3	AKAP3	B4GALT1	CACNA1H	CCDC87	CRISP1	EQTN	FAM170B	GARIN1B	GLRA1	GLRB	HYAL3	IFTAP	IQCF1	PCSK4	PKDREJ	PLA2G10	PLB1	PLCB1	PLCD4	PRND	PRSS37	RAB3A	RIMS1	ROPN1B	SERPINA10	SPESP1	SPINK1	SPINK13	STX2	STXBP1	SYT6	TNP2	TRIM36	UNC13B	ZP2	ZP3	ZP4
GOBP_ACTIN_CROSSLINK_FORMATION	https://www.gsea-msigdb.org/gsea/msigdb/human/geneset/GOBP_ACTIN_CROSSLINK_FORMATION	AIF1	BAIAP2	BAIAP2L1	BAIAP2L2	DPYSL3	EPS8	FLNA	GAS2	GAS2L1	GAS2L2	GAS2L3	LCP1	MARCKS
GOBP_ACTIN_FILAMENT_BASED_MOVEMENT	https://www.gsea-msigdb.org/gsea/msigdb/human/geneset/GOBP_ACTIN_FILAMENT_BASED_MOVEMENT	ABCC9	ACTA2	ACTC1	ACTN4	ADCY10	ADORA1	AKAP9	ANK2	ATP1A1	ATP1A2	ATP2A1	ATP2A2	BIN1	CACNA1C	CACNA1D	CACNA1G	CACNA2D1	CACNB2	CAMK2D	CAV1	CAV3	CCDC88C	CTNNA3	DLG1	DSC2	DSG2	DSP	EMP2	EPB41L5	EPDR1	FGF12	FGF13	FLNA	FNBP1L	FRMD6	GATA4	GJA1	GJA5	GJC1	GPD1L	GSN	HCN4	JUP	KCNA5	KCND3	KCNE1	KCNE2	KCNE3
GOBP_ACTIN_FILAMENT_BASED_PROCESS	https://www.gsea-msigdb.org/gsea/msigdb/human/geneset/GOBP_ACTIN_FILAMENT_BASED_PROCESS	ABCC9	ABI1	ABI2	ABI3	ABITRAM	ABL1	ABL2	ABRACL	ACAP2	ACTA1	ACTA2	ACTB	ACTBL2	ACTC1	ACTG1	ACTL8	ACTL9	ACTN1	ACTN2	ACTN3	ACTN4	ACTR2	ACTR3	ADCY10	ADD1	ADD2	ADD3	ADORA1	ADPRHL1	ADRA2A	AGAP2	AIF1	AIF1L	AKAP11	AKAP13	AKAP9	ALDOA	ALKBH4	ALMS1	ALOX15	AMOT	AMOTL1	AMOTL2	ANG	ANK2	ANKRD1	ANKRD23	ANLN
GOBP_ACTIN_FILAMENT_BASED_TRANSPORT	https://www.gsea-msigdb.org/gsea/msigdb/human/geneset/GOBP_ACTIN_FILAMENT_BASED_TRANSPORT	ACTN4	FNBP1L	MYO15A	MYO19	MYO1A	MYO1B	MYO1C	MYO1D	MYO1E	MYO1F	MYO1G	MYO1H	MYO5A	MYO5B	MYO5C	MYO6	MYO7A	MYO7B	SUN2	SYNE2	WASL
GOBP_ACTIN_FILAMENT_BUNDLE_ORGANIZATION	https://www.gsea-msigdb.org/gsea/msigdb/human/geneset/GOBP_ACTIN_FILAMENT_BUNDLE_ORGANIZATION	ABL1	ACTG1	ACTN1	ADD1	ADD2	AIF1	AIF1L	ALMS1	APOA1	ARAP1	ARHGAP28	ARHGAP6	ARHGEF10	ARHGEF10L	ARHGEF15	ARHGEF18	ARHGEF5	ARRB1	ASAP3	BAG4	BAIAP2	BAIAP2L1	BAIAP2L2	BBS4	BRAF	CALD1	CARMIL1	CCDC88A	CCN2	CD47	CDC42	CGNL1	CLASP1	CLASP2	CORO1B	CORO2B	CUL3	CX3CL1	DLC1	DMTN	DPYSL3	ELN	EPHA1	EPS8	ESPN	ESPNL	EVL	EZR
GOBP_ACTIN_FILAMENT_DEPOLYMERIZATION	https://www.gsea-msigdb.org/gsea/msigdb/human/geneset/GOBP_ACTIN_FILAMENT_DEPOLYMERIZATION	ACTN2	ADD1	ADD2	ADD3	AVIL	CAPG	CAPZA1	CAPZA2	CAPZA3	CAPZB	CARMIL1	CARMIL2	CFL1	CFL2	CRACD	DMTN	DSTN	EPS8	F2RL1	FLII	GSN	LIMA1	LMOD1	LMOD2	LMOD3	MICAL1	MICAL2	MICAL3	MTPN	PDXP	PIK3CA	PLEK	PLEKHH2	PPP1R9B	RDX	SCIN	SEMA5A	SH3BP1	SPTA1	SPTAN1	SPTB	SPTBN1	SPTBN2	SPTBN4	SPTBN5	SVIL	SWAP70	TMOD1
GOBP_ACTIN_FILAMENT_NETWORK_FORMATION	https://www.gsea-msigdb.org/gsea/msigdb/human/geneset/GOBP_ACTIN_FILAMENT_NETWORK_FORMATION	ACTN1	CARMIL1	CARMIL2	COBL	LCP1	PLS1	PLS3	SPIRE1	SPIRE2
GOBP_ACTIN_FILAMENT_ORGANIZATION	https://www.gsea-msigdb.org/gsea/msigdb/human/geneset/GOBP_ACTIN_FILAMENT_ORGANIZATION	ABI1	ABI2	ABITRAM	ABL1	ACTA1	ACTC1	ACTG1	ACTL8	ACTN1	ACTN2	ACTR2	ACTR3	ADD1	ADD2	ADD3	AIF1	AIF1L	ALDOA	ALMS1	ALOX15	ANG	AP1AR	APOA1	AQP2	ARAP1	ARF1	ARF6	ARFGEF1	ARFIP1	ARFIP2	ARHGAP12	ARHGAP17	ARHGAP18	ARHGAP25	ARHGAP28	ARHGAP35	ARHGAP40	ARHGAP6	ARHGEF10	ARHGEF10L	ARHGEF15	ARHGEF18	ARHGEF2	ARHGEF5	ARPC1A	ARPC1B	ARPC2	ARPC3
GOBP_ACTIN_FILAMENT_SEVERING	https://www.gsea-msigdb.org/gsea/msigdb/human/geneset/GOBP_ACTIN_FILAMENT_SEVERING	AVIL	CAPG	CFL1	CFL2	DSTN	FLII	FMNL1	GMFB	GMFG	GSN	MYH9	SCIN	SRGAP2	SVIL	VIL1	VILL
GOBP_ACTIN_MEDIATED_CELL_CONTRACTION	https://www.gsea-msigdb.org/gsea/msigdb/human/geneset/GOBP_ACTIN_MEDIATED_CELL_CONTRACTION	ABCC9	ACTA2	ACTC1	ADCY10	ADORA1	AKAP9	ANK2	ATP1A1	ATP1A2	ATP2A1	ATP2A2	BIN1	CACNA1C	CACNA1D	CACNA1G	CACNA2D1	CACNB2	CAMK2D	CAV1	CAV3	CCDC88C	CTNNA3	DLG1	DSC2	DSG2	DSP	EMP2	EPB41L5	EPDR1	FGF12	FGF13	FLNA	FRMD6	GATA4	GJA1	GJA5	GJC1	GPD1L	GSN	HCN4	JUP	KCNA5	KCND3	KCNE1	KCNE2	KCNE3	KCNE4	KCNE5
GOBP_ACTIN_MYOSIN_FILAMENT_SLIDING	https://www.gsea-msigdb.org/gsea/msigdb/human/geneset/GOBP_ACTIN_MYOSIN_FILAMENT_SLIDING	ACTC1	MYBPC3	MYH2	MYH3	MYH4	MYH6	MYH7	MYH8	MYL1	MYL11	MYL6	MYL6B	MYLK2	TNNC1	TNNT2	TPM1
GOBP_ACTIN_NUCLEATION	https://www.gsea-msigdb.org/gsea/msigdb/human/geneset/GOBP_ACTIN_NUCLEATION	ABI2	ACTR2	ACTR3	AP1AR	ARF1	ARFIP1	ARFIP2	ARPC1A	ARPC1B	ARPC2	ARPC3	ARPC4	ARPC5	ARPC5L	ARPIN	BRK1	CARMIL1	CARMIL2	CARMIL3	CORO1A	CORO1B	CTNNA2	CYFIP1	DNAI3	FCHSD2	FMN1	GMFB	GMFG	GSN	HIP1R	IQGAP2	JMY	LMOD1	LMOD2	LMOD3	MAGEL2	NCKAP1	PICK1	RNH1	SCIN	SPIRE1	SPIRE2	TRIM27	VIL1	WASF1	WASF2	WASF3	WASH3P
GOBP_ACTIN_POLYMERIZATION_DEPENDENT_CELL_MOTILITY	https://www.gsea-msigdb.org/gsea/msigdb/human/geneset/GOBP_ACTIN_POLYMERIZATION_DEPENDENT_CELL_MOTILITY	ACTR3	ARPC2	ARPC3	ENAH	EPS8	JMY	NCKAP1L
GOBP_ACTIN_POLYMERIZATION_OR_DEPOLYMERIZATION	https://www.gsea-msigdb.org/gsea/msigdb/human/geneset/GOBP_ACTIN_POLYMERIZATION_OR_DEPOLYMERIZATION	ABI1	ABI2	ABITRAM	ABL1	ACTN2	ADD1	ADD2	ADD3	AIF1	ALOX15	ANG	ARF6	ARFGEF1	ARHGAP18	ARHGAP28	ARHGAP35	ARHGAP40	ARHGAP6	ARPC2	ARPC3	ARPC4	ARPC5	ARPC5L	AVIL	BAG4	BAIAP2	BAIAP2L1	BAIAP2L2	BBS4	BIN1	BRK1	C15orf62	CAPG	CAPZA1	CAPZA2	CAPZA3	CAPZB	CARMIL1	CARMIL2	CATIP	CCL11	CCL21	CCL24	CCL26	CCR7	CDC42EP1	CDC42EP2	CDC42EP3
GOBP_ACTION_POTENTIAL	https://www.gsea-msigdb.org/gsea/msigdb/human/geneset/GOBP_ACTION_POTENTIAL	ABCC9	ADRA1A	AKAP6	AKAP9	ANK2	ANK3	ATP1A1	ATP1A2	ATP1B1	ATP2A2	BIN1	CACNA1C	CACNA1D	CACNA1G	CACNA1I	CACNA2D1	CACNB2	CACNB3	CACNB4	CALM1	CALM3	CAMK2D	CAV1	CAV3	CD36	CHRNA1	CHRNA4	CHRNB2	CHRNB4	CLCN1	CLDN19	CLN3	CNR1	CNR2	CNTNAP1	CTNNA3	CXADR	DLG1	DMD	DRD1	DSC2	DSG2	DSP	FGF12	FGF13	FKBP1B	FLNA	FMR1
GOBP_ACTIVATED_T_CELL_PROLIFERATION	https://www.gsea-msigdb.org/gsea/msigdb/human/geneset/GOBP_ACTIVATED_T_CELL_PROLIFERATION	ABL1	AGER	ARG1	BTN2A2	BTN3A1	CADM1	CASP3	CD24	CD274	CLC	CRTAM	EPO	FADD	FOXP3	FYN	GPAM	HHLA2	HMGB1	ICOSLG	IDO1	IGF1	IGF2	IGFBP2	IL12B	IL12RB1	IL18	IL2	IL23A	IL23R	IL2RA	LGALS9	LILRB4	LRRC32	MIR181C	MIR21	MIR30B	PDCD1LG2	PPP3CA	PRKAR1A	PRNP	PYCARD	RC3H1	RIPK3	RPS3	SCRIB	SLAMF1	STAT5B	TMIGD2
GOBP_ACTIVATION_INDUCED_CELL_DEATH_OF_T_CELLS	https://www.gsea-msigdb.org/gsea/msigdb/human/geneset/GOBP_ACTIVATION_INDUCED_CELL_DEATH_OF_T_CELLS	AKT1	DNAJA3	FADD	FAS	GPAM	IL2RA	RIPK3	RPS6	TSC22D3
GOBP_ACTIVATION_OF_ADENYLATE_CYCLASE_ACTIVITY	https://www.gsea-msigdb.org/gsea/msigdb/human/geneset/GOBP_ACTIVATION_OF_ADENYLATE_CYCLASE_ACTIVITY	ACR	ADCYAP1	ADORA2B	ADORA3	ADRB2	ADRB3	AVPR2	CALCR	CAP1	CAP2	CRHR1	DRD1	DRD5	EDNRA	FSHR	GIPR	GLP1R	LGR4	LGR5	LHCGR	P2RY11	RAF1	RXFP1	RXFP2	TMIGD3	TSHR
GOBP_ACTIVATION_OF_CYSTEINE_TYPE_ENDOPEPTIDASE_ACTIVITY	https://www.gsea-msigdb.org/gsea/msigdb/human/geneset/GOBP_ACTIVATION_OF_CYSTEINE_TYPE_ENDOPEPTIDASE_ACTIVITY	ASPH	BAD	BAK1	CASP8	CIDEB	CYFIP2	FADD	GRIN2A	IFI16	LGMN	NLRC4	PERP	RIPK2	TBC1D10A
GOBP_ACTIVATION_OF_CYSTEINE_TYPE_ENDOPEPTIDASE_ACTIVITY_INVOLVED_IN_APOPTOTIC_PROCESS	https://www.gsea-msigdb.org/gsea/msigdb/human/geneset/GOBP_ACTIVATION_OF_CYSTEINE_TYPE_ENDOPEPTIDASE_ACTIVITY_INVOLVED_IN_APOPTOTIC_PROCESS	ACER2	AIFM1	ANP32B	APAF1	ATP2A3	BAD	BAX	BBC3	BCL2L10	BCL2L13	BID	BOK	CARD8	CASP10	CASP2	CASP8	CASP8AP2	CASP9	COL4A3	CRADD	CYCS	DAP	DIABLO	DLC1	EGLN3	EIF2AK3	F2R	F3	FAM162A	FASLG	HIP1	HIP1R	HSPD1	HSPE1	IFT57	JAK2	KHDC1	KHDC1L	LAPTM5	LCK	MAPT	MIR15A	MTCH1	MUL1	NGFR	NKX3-1	NLRC4	NLRP1
GOBP_ACTIVATION_OF_CYSTEINE_TYPE_ENDOPEPTIDASE_ACTIVITY_INVOLVED_IN_APOPTOTIC_PROCESS_BY_CYTOCHROME_C	https://www.gsea-msigdb.org/gsea/msigdb/human/geneset/GOBP_ACTIVATION_OF_CYSTEINE_TYPE_ENDOPEPTIDASE_ACTIVITY_INVOLVED_IN_APOPTOTIC_PROCESS_BY_CYTOCHROME_C	APAF1	BAX	BOK	CASP9	CYCS	DIABLO
GOBP_ACTIVATION_OF_GTPASE_ACTIVITY	https://www.gsea-msigdb.org/gsea/msigdb/human/geneset/GOBP_ACTIVATION_OF_GTPASE_ACTIVITY	ABR	AGAP1	AGAP11	AGAP2	AGAP3	AGAP4	AGAP5	AGAP6	AGAP7P	AGAP9	APC2	ARHGAP22	ARHGAP24	ARHGAP25	ARHGAP29	ARHGAP42	ARHGAP45	ARHGEF10	ARHGEF15	ARHGEF16	ARHGEF19	ARHGEF26	ARHGEF5	BCR	CCDC125	CCL21	CCR7	CORO1C	CXCL13	DOCK7	ECT2	EPHA1	EPHA2	EVI5	EVI5L	FOXJ1	GARNL3	GMIP	GPR65	GRTP1	MTSS2	NGEF	NTF3	NTRK3	PIP5K1A	RALGAPA1	RALGAPA2	RALGAPB
GOBP_ACTIVATION_OF_IMMUNE_RESPONSE	https://www.gsea-msigdb.org/gsea/msigdb/human/geneset/GOBP_ACTIVATION_OF_IMMUNE_RESPONSE	A2M	ABL1	ACOD1	ADA	AIM2	ALPK1	ANKRD17	AP3B1	APPL1	APPL2	ARRB2	ATAT1	BAG6	BANK1	BAX	BCAR1	BCL10	BCL2	BIRC2	BIRC3	BLK	BLNK	BMX	BPIFB1	BRAF	BRCC3	BTK	BTN1A1	BTN2A1	BTN2A2	BTN2A3P	BTN3A1	BTN3A2	BTN3A3	BTNL10P	BTNL2	BTNL3	BTNL8	BTNL9	C1QA	C1QB	C1QBP	C1QC	C1R	C1RL	C1S	C2	C3
GOBP_ACTIVATION_OF_INNATE_IMMUNE_RESPONSE	https://www.gsea-msigdb.org/gsea/msigdb/human/geneset/GOBP_ACTIVATION_OF_INNATE_IMMUNE_RESPONSE	ACOD1	AIM2	ALPK1	ANKRD17	AP3B1	APPL1	APPL2	ARRB2	ATAT1	BCL10	BIRC2	BIRC3	BPIFB1	BRCC3	BTK	C1QBP	CACTIN	CARD8	CASP1	CASP6	CAV1	CD14	CD300A	CD300LF	CD36	CD40	CGAS	CHUK	CLEC4E	CLEC6A	CLEC7A	CLPB	COLEC10	COLEC11	COLEC12	CPTP	CREBBP	CSNK1A1	CTSS	CYBA	CYLD	DAB2IP	DDX3X	DDX60	DHX33	DHX58	ECSIT	EIF2AK2
GOBP_ACTIVATION_OF_JANUS_KINASE_ACTIVITY	https://www.gsea-msigdb.org/gsea/msigdb/human/geneset/GOBP_ACTIVATION_OF_JANUS_KINASE_ACTIVITY	AGT	CCL5	CD300A	GH1	IL12B	IL23A	IL23R	IL4	IL6R	JAK2	PIBF1	PRLR	PTK2B
GOBP_ACTIVATION_OF_MEIOSIS	https://www.gsea-msigdb.org/gsea/msigdb/human/geneset/GOBP_ACTIVATION_OF_MEIOSIS	MEIOSIN	MSX1	MSX2	NPR2	PLCB1	STRA8
GOBP_ACTIVATION_OF_NF_KAPPAB_INDUCING_KINASE_ACTIVITY	https://www.gsea-msigdb.org/gsea/msigdb/human/geneset/GOBP_ACTIVATION_OF_NF_KAPPAB_INDUCING_KINASE_ACTIVITY	CARD10	CARD14	CHI3L1	COPS8	IRAK1	MALT1	MAP3K7	TIRAP	TLR3	TLR6	TNFRSF10A	TNFRSF10B	TNFSF15	TRAF2	TRAF6	ZFP91
GOBP_ACTIVATION_OF_PHOSPHOLIPASE_C_ACTIVITY	https://www.gsea-msigdb.org/gsea/msigdb/human/geneset/GOBP_ACTIVATION_OF_PHOSPHOLIPASE_C_ACTIVITY	ADRA1A	ANG	ARHGAP6	AVPR1A	AVPR1B	C5AR1	CD86	EDNRA	EGFR	GNA15	GNAQ	GPR55	HTR2A	HTR2B	ITK	LPAR1	LPAR2	NMUR1	P2RY12	P2RY6	PHB1	PHB2	PLCB2	PTH	RASGRP4	S1PR4	SELE	TXK
GOBP_ACTIVATION_OF_PROTEIN_KINASE_ACTIVITY	https://www.gsea-msigdb.org/gsea/msigdb/human/geneset/GOBP_ACTIVATION_OF_PROTEIN_KINASE_ACTIVITY	ABL1	ADCY8	ADRA2A	ADRA2B	ADRA2C	ADRB2	AGT	ANG	ANGPT1	AXIN1	BORA	CALCA	CAMKK2	CARD10	CARD14	CCDC88A	CCL5	CD300A	CD86	CHI3L1	CHRNA3	CLSPN	COPS8	DYNAP	ECT2	EMP2	FGF1	GAS6	GH1	IGF1	IL12B	IL18	IL23A	IL23R	IL4	IL6R	INS	INSR	IRAK1	ITGB1BP1	ITGB3	JAK2	KIF14	LEP	MALT1	MAP3K7	MARK2	MIR143
GOBP_ACTIVATION_OF_PROTEIN_KINASE_B_ACTIVITY	https://www.gsea-msigdb.org/gsea/msigdb/human/geneset/GOBP_ACTIVATION_OF_PROTEIN_KINASE_B_ACTIVITY	ADRA2A	ADRA2B	ADRA2C	ANG	CCDC88A	DYNAP	FGF1	GAS6	IGF1	IL18	INS	INSR	ITGB1BP1	MIR143	MIR21	MT3	NRG1	NTF3	NTRK3	OSBPL8	PARK7	PDPK1	PINK1	PPIA	TXN	WNT5A
GOBP_ACTIVATION_OF_PROTEIN_KINASE_C_ACTIVITY	https://www.gsea-msigdb.org/gsea/msigdb/human/geneset/GOBP_ACTIVATION_OF_PROTEIN_KINASE_C_ACTIVITY	ABL1	CD86	LEP	PHB1	PHB2
GOBP_ACTIVATION_OF_TRANSMEMBRANE_RECEPTOR_PROTEIN_TYROSINE_KINASE_ACTIVITY	https://www.gsea-msigdb.org/gsea/msigdb/human/geneset/GOBP_ACTIVATION_OF_TRANSMEMBRANE_RECEPTOR_PROTEIN_TYROSINE_KINASE_ACTIVITY	ADRB2	ANGPT1	CHRNA3	NRG1	PILRB	PRLR
GOBP_ACTIVIN_RECEPTOR_SIGNALING_PATHWAY	https://www.gsea-msigdb.org/gsea/msigdb/human/geneset/GOBP_ACTIVIN_RECEPTOR_SIGNALING_PATHWAY	ACVR1	ACVR1B	ACVR1C	ACVR2A	ACVR2B	ACVRL1	BMP10	BMPR2	CER1	CFC1	CFC1B	CITED2	CSNK2B	DACT1	DACT2	DAND5	DMRT1	FGF10	FGF9	FKBP1A	FOXH1	FST	FSTL3	GDF2	GDF6	GDF7	HJV	IGSF1	INHBA	INHBB	LEMD3	MAGI2	NODAL	NOMO1	NOMO3	SHH	SKI	SMAD2	SMAD3	SMAD4	SMAD6	SMAD7	SMURF1	TDGF1	TDGF1P3	TGFBR1	TGFBR2	TGIF2
GOBP_ACTOMYOSIN_CONTRACTILE_RING_ORGANIZATION	https://www.gsea-msigdb.org/gsea/msigdb/human/geneset/GOBP_ACTOMYOSIN_CONTRACTILE_RING_ORGANIZATION	ANLN	ECT2	IQGAP1	IQGAP2	IQGAP3	PDCD6IP	PLEC	RACGAP1	RTKN	VPS4A
GOBP_ACTOMYOSIN_STRUCTURE_ORGANIZATION	https://www.gsea-msigdb.org/gsea/msigdb/human/geneset/GOBP_ACTOMYOSIN_STRUCTURE_ORGANIZATION	ABL1	ACTA1	ACTC1	ACTG1	ACTL8	ACTN2	ADPRHL1	AKAP13	ALKBH4	ALMS1	ANKRD1	ANKRD23	ANLN	APOA1	ARAP1	ARHGAP28	ARHGAP6	ARHGEF10	ARHGEF10L	ARHGEF15	ARHGEF18	ARHGEF5	ARRB1	ASAP3	BAG4	BBS4	BMP10	BRAF	CAPN3	CARMIL1	CASQ1	CAV3	CCDC88A	CCN2	CD47	CDC42	CDC42BPA	CDC42BPB	CDC42BPG	CFL2	CFLAR	CGNL1	CLASP1	CLASP2	CNN1	CNN2	CNN3	CORO2B
GOBP_ACUTE_INFLAMMATORY_RESPONSE	https://www.gsea-msigdb.org/gsea/msigdb/human/geneset/GOBP_ACUTE_INFLAMMATORY_RESPONSE	A2M	ACVR1	ADAM8	ADORA1	AHSG	ALOX5AP	ANO6	APCS	APOL2	ASH1L	ASS1	B4GALT1	BTK	C2CD4A	C2CD4B	C3	CCR7	CD163	CD6	CEBPB	CNR1	CREB3L3	CRP	CTNNBIP1	CXCR2	DNASE1	DNASE1L3	EDNRB	EIF2AK1	ELANE	EPO	EXT1	F12	F2	F3	F8	FCER1A	FCGR1A	FCGR2B	FCGR3A	FFAR2	FFAR3	FN1	FUT7	GSTP1	HFE	HLA-E	HP
GOBP_ACUTE_INFLAMMATORY_RESPONSE_TO_ANTIGENIC_STIMULUS	https://www.gsea-msigdb.org/gsea/msigdb/human/geneset/GOBP_ACUTE_INFLAMMATORY_RESPONSE_TO_ANTIGENIC_STIMULUS	A2M	BTK	C3	CCR7	CD6	CNR1	CXCR2	ELANE	EXT1	FCER1A	FCGR1A	FCGR2B	FCGR3A	FUT7	HLA-E	IGHG1	IL20RB	IL31RA	MIR302E	NLRP6	NPY5R	PARK7	PLA2G2D	SELENOS	SPN	ZP3
GOBP_ACUTE_PHASE_RESPONSE	https://www.gsea-msigdb.org/gsea/msigdb/human/geneset/GOBP_ACUTE_PHASE_RESPONSE	A2M	AHSG	APCS	APOL2	ASS1	CD163	CEBPB	CNR1	CRP	EDNRB	EPO	F2	F8	FN1	HFE	HP	IL1A	IL1B	IL22	IL6	IL6R	INS	ITIH4	LBP	MBL2	MRGPRX1	ORM1	ORM2	PLSCR1	PTGER3	PTGES	PTGS2	REG3A	REG3G	SAA1	SAA2	SAA4	SERPINA1	SERPINA3	SERPINF2	SIGIRR	TFR2	TFRC	TNF	TNFRSF11A	TNFSF11	TRPV1	UGT1A1
GOBP_ACYLGLYCEROL_HOMEOSTASIS	https://www.gsea-msigdb.org/gsea/msigdb/human/geneset/GOBP_ACYLGLYCEROL_HOMEOSTASIS	ABCG5	ABCG8	ACSM2A	ADORA1	ANGPTL3	ANGPTL4	ANGPTL8	APOA1	APOA4	APOA5	APOC2	APOC3	APOC4	APOE	C1QTNF3	CETP	DGAT2	FITM2	FUNDC2	GCKR	GIP	GPIHBP1	HNF4A	IL18	LIPC	LPL	MED13	MIR208A	MIR33A	MIR34A	MIR379	MLXIPL	MTLN	NR1H3	NR1H4	PLA2G12B	PNPLA8	RORA	SCARB1	SESN2	SIRT1	SLC25A27	XBP1
GOBP_ACYLGLYCEROL_TRANSPORT	https://www.gsea-msigdb.org/gsea/msigdb/human/geneset/GOBP_ACYLGLYCEROL_TRANSPORT	APOH	CD36	CETP	DENND5B	LPCAT3	MIR30C1	MTTP	PRAP1
GOBP_ADAPTATION_OF_SIGNALING_PATHWAY	https://www.gsea-msigdb.org/gsea/msigdb/human/geneset/GOBP_ADAPTATION_OF_SIGNALING_PATHWAY	ADM	ADRB2	ADRB3	APELA	APLN	APLNR	ARR3	ARRB1	ARRB2	DRD2	DRD3	ENTREP1	GIPR	GRK2	GRK3	GRM5	GTF2H2	HTR1B	HTR2B	NECAB2	RDH11	RHO	RS1	SAG	UBQLN2
GOBP_ADAPTIVE_IMMUNE_RESPONSE	https://www.gsea-msigdb.org/gsea/msigdb/human/geneset/GOBP_ADAPTIVE_IMMUNE_RESPONSE	ADA	ADAM17	ADCY7	ADGRE1	AGER	AHR	AICDA	AIRE	AKIRIN2	ALCAM	ALOX15	ANXA1	APLF	ARG1	ARG2	ARID5A	ASCL2	ATAD5	B2M	BACH2	BATF	BCL10	BCL3	BCL6	BMX	BTK	BTLA	BTN3A1	BTN3A2	BTN3A3	BTNL8	C17orf99	C1QA	C1QB	C1QBP	C1QC	C1R	C1RL	C1S	C2	C3	C4A	C4B	C4BPA	C4BPB	C5	C6	C7
GOBP_ADAPTIVE_IMMUNE_RESPONSE_BASED_ON_SOMATIC_RECOMBINATION_OF_IMMUNE_RECEPTORS_BUILT_FROM_IMMUNOGLOBULIN_SUPERFAMILY_DOMAINS	https://www.gsea-msigdb.org/gsea/msigdb/human/geneset/GOBP_ADAPTIVE_IMMUNE_RESPONSE_BASED_ON_SOMATIC_RECOMBINATION_OF_IMMUNE_RECEPTORS_BUILT_FROM_IMMUNOGLOBULIN_SUPERFAMILY_DOMAINS	ADA	ADAM17	AGER	AHR	AICDA	AIRE	ANXA1	APLF	ARG1	ARID5A	ASCL2	ATAD5	B2M	BACH2	BATF	BCL10	BCL3	BCL6	BTK	BTN3A2	BTN3A3	C17orf99	C1QA	C1QB	C1QBP	C1QC	C1R	C1RL	C1S	C2	C3	C4A	C4B	C4BPA	C4BPB	C5	C6	C7	C8A	C8B	C8G	C9	CADM1	CARD9	CCL19	CCR2	CCR6	CD19
GOBP_ADAPTIVE_THERMOGENESIS	https://www.gsea-msigdb.org/gsea/msigdb/human/geneset/GOBP_ADAPTIVE_THERMOGENESIS	ABHD6	ACADL	ACHE	ACOT11	ACOT13	ACSL1	ACTN3	ACVR2B	ADAM17	ADAMTS5	ADCYAP1	ADIPOQ	ADIPOR1	ADIPOR2	ADISSP	ADRB1	ADRB2	ADRB3	ALDH1A1	ALMS1	ALPL	APC	APPL2	ARRDC3	ATF4	BMAL1	BMP8A	BSCL2	CAV1	CCR2	CD36	CEBPB	CIDEA	CKB	CMKLR1	CNOT3	CPT2	CXCR4	DBH	DDIT3	DECR1	DHRS7B	DIO2	DOCK7	DYNC1H1	EBF2	EHMT1	ELOVL3
GOBP_ADENINE_TRANSPORT	https://www.gsea-msigdb.org/gsea/msigdb/human/geneset/GOBP_ADENINE_TRANSPORT	SLC25A4	SLC25A5	SLC29A1	SLC29A2	SLC43A3	VDAC3
GOBP_ADENOHYPOPHYSIS_DEVELOPMENT	https://www.gsea-msigdb.org/gsea/msigdb/human/geneset/GOBP_ADENOHYPOPHYSIS_DEVELOPMENT	BMP2	DRD2	FGF2	FGF8	GATA2	GHRH	GHRHR	GSX1	HES1	LHX3	PITX2	POU1F1	PROP1	SLC6A3	SOX2	WNT4
GOBP_ADENOSINE_METABOLIC_PROCESS	https://www.gsea-msigdb.org/gsea/msigdb/human/geneset/GOBP_ADENOSINE_METABOLIC_PROCESS	ACP3	ADA	ADA2	ADAL	NT5C1A	NT5C1B	NT5C2	NT5E	PTGDR	XDH
GOBP_ADENOSINE_TO_INOSINE_EDITING	https://www.gsea-msigdb.org/gsea/msigdb/human/geneset/GOBP_ADENOSINE_TO_INOSINE_EDITING	ADAD1	ADAD2	ADAR	ADARB1	ADARB2	ADAT2	METTL3
GOBP_ADENOSINE_TRANSPORT	https://www.gsea-msigdb.org/gsea/msigdb/human/geneset/GOBP_ADENOSINE_TRANSPORT	SLC28A2	SLC29A1	SLC29A2	SLC29A3	SLC29A4
GOBP_ADENYLATE_CYCLASE_ACTIVATING_ADRENERGIC_RECEPTOR_SIGNALING_PATHWAY	https://www.gsea-msigdb.org/gsea/msigdb/human/geneset/GOBP_ADENYLATE_CYCLASE_ACTIVATING_ADRENERGIC_RECEPTOR_SIGNALING_PATHWAY	ADCY9	ADRA1A	ADRA1B	ADRA1D	ADRA2A	ADRA2B	ADRA2C	ADRB1	ADRB2	ADRB3	AKAP13	ARRDC3	ATP2B4	CHGA	CRTC3	DRD1	DRD2	DRD3	DRD5	GNAI2	GPR101	MIR1-1	MIR133A1	PDE4B	PDE4D	PLN	RAPGEF2
GOBP_ADENYLATE_CYCLASE_ACTIVATING_ADRENERGIC_RECEPTOR_SIGNALING_PATHWAY_INVOLVED_IN_HEART_PROCESS	https://www.gsea-msigdb.org/gsea/msigdb/human/geneset/GOBP_ADENYLATE_CYCLASE_ACTIVATING_ADRENERGIC_RECEPTOR_SIGNALING_PATHWAY_INVOLVED_IN_HEART_PROCESS	AKAP13	ATP2B4	CHGA	GNAI2	MIR1-1	MIR133A1	PDE4B	PDE4D	PLN
GOBP_ADENYLATE_CYCLASE_ACTIVATING_DOPAMINE_RECEPTOR_SIGNALING_PATHWAY	https://www.gsea-msigdb.org/gsea/msigdb/human/geneset/GOBP_ADENYLATE_CYCLASE_ACTIVATING_DOPAMINE_RECEPTOR_SIGNALING_PATHWAY	ADCY5	DRD1	DRD3	DRD5	GNAS	GNB1	GNG2	NHERF1	PTGER1
GOBP_ADENYLATE_CYCLASE_ACTIVATING_G_PROTEIN_COUPLED_RECEPTOR_SIGNALING_PATHWAY	https://www.gsea-msigdb.org/gsea/msigdb/human/geneset/GOBP_ADENYLATE_CYCLASE_ACTIVATING_G_PROTEIN_COUPLED_RECEPTOR_SIGNALING_PATHWAY	ABCA1	ADCY1	ADCY2	ADCY3	ADCY4	ADCY5	ADCY6	ADCY7	ADCY8	ADCY9	ADCYAP1	ADGRB1	ADGRB2	ADGRB3	ADGRD1	ADGRD2	ADGRE1	ADGRE2	ADGRE3	ADGRE5	ADGRF1	ADGRF2	ADGRF3	ADGRF4	ADGRF5	ADGRG1	ADGRG2	ADGRG3	ADGRG4	ADGRG5	ADGRG6	ADGRG7	ADGRL1	ADGRL2	ADGRL3	ADGRL4	ADM	ADM2	ADM5	ADORA2A	ADORA2B	ADRA1A	ADRA1B	ADRA1D	ADRA2A	ADRA2B	ADRA2C	ADRB1
GOBP_ADENYLATE_CYCLASE_INHIBITING_DOPAMINE_RECEPTOR_SIGNALING_PATHWAY	https://www.gsea-msigdb.org/gsea/msigdb/human/geneset/GOBP_ADENYLATE_CYCLASE_INHIBITING_DOPAMINE_RECEPTOR_SIGNALING_PATHWAY	ADCY5	DRD2	DRD3	DRD4	FLNA	PRMT5
GOBP_ADENYLATE_CYCLASE_INHIBITING_G_PROTEIN_COUPLED_ACETYLCHOLINE_RECEPTOR_SIGNALING_PATHWAY	https://www.gsea-msigdb.org/gsea/msigdb/human/geneset/GOBP_ADENYLATE_CYCLASE_INHIBITING_G_PROTEIN_COUPLED_ACETYLCHOLINE_RECEPTOR_SIGNALING_PATHWAY	CHRM1	CHRM2	CHRM3	CHRM4	CHRM5	HRH3	HRH4	OPRM1
GOBP_ADENYLATE_CYCLASE_INHIBITING_G_PROTEIN_COUPLED_GLUTAMATE_RECEPTOR_SIGNALING_PATHWAY	https://www.gsea-msigdb.org/gsea/msigdb/human/geneset/GOBP_ADENYLATE_CYCLASE_INHIBITING_G_PROTEIN_COUPLED_GLUTAMATE_RECEPTOR_SIGNALING_PATHWAY	GRIK3	GRM1	GRM2	GRM3	GRM4	GRM5	GRM6	GRM7	GRM8
GOBP_ADENYLATE_CYCLASE_INHIBITING_G_PROTEIN_COUPLED_RECEPTOR_SIGNALING_PATHWAY	https://www.gsea-msigdb.org/gsea/msigdb/human/geneset/GOBP_ADENYLATE_CYCLASE_INHIBITING_G_PROTEIN_COUPLED_RECEPTOR_SIGNALING_PATHWAY	ADCY2	ADCY4	ADCY5	ADCY6	ADCY7	ADORA1	ADRA2A	AKAP12	AKAP5	CASR	CHRM1	CHRM2	CHRM3	CHRM4	CHRM5	CORT	DRD2	DRD3	DRD4	EDN1	EDNRA	FFAR3	FLNA	FPR2	GABBR1	GABBR2	GNAI1	GNAI2	GNAI3	GNAZ	GPR176	GPR37	GPR37L1	GRIK3	GRM1	GRM2	GRM3	GRM4	GRM5	GRM6	GRM7	GRM8	HRH3	HRH4	HTR1A	HTR1B	HTR1D	HTR1E
GOBP_ADENYLATE_CYCLASE_INHIBITING_SEROTONIN_RECEPTOR_SIGNALING_PATHWAY	https://www.gsea-msigdb.org/gsea/msigdb/human/geneset/GOBP_ADENYLATE_CYCLASE_INHIBITING_SEROTONIN_RECEPTOR_SIGNALING_PATHWAY	DRD4	HTR1A	HTR1B	HTR1D	HTR1E	HTR1F	HTR5A
GOBP_ADENYLATE_CYCLASE_MODULATING_G_PROTEIN_COUPLED_RECEPTOR_SIGNALING_PATHWAY	https://www.gsea-msigdb.org/gsea/msigdb/human/geneset/GOBP_ADENYLATE_CYCLASE_MODULATING_G_PROTEIN_COUPLED_RECEPTOR_SIGNALING_PATHWAY	ABCA1	ADCY1	ADCY2	ADCY3	ADCY4	ADCY5	ADCY6	ADCY7	ADCY8	ADCY9	ADCYAP1	ADCYAP1R1	ADGRB1	ADGRB2	ADGRB3	ADGRD1	ADGRD2	ADGRE1	ADGRE2	ADGRE3	ADGRE5	ADGRF1	ADGRF2	ADGRF3	ADGRF4	ADGRF5	ADGRG1	ADGRG2	ADGRG3	ADGRG4	ADGRG5	ADGRG6	ADGRG7	ADGRL1	ADGRL2	ADGRL3	ADGRL4	ADM	ADM2	ADM5	ADORA1	ADORA2A	ADORA2B	ADRA1A	ADRA1B	ADRA1D	ADRA2A	ADRA2B
GOBP_ADHERENS_JUNCTION_ASSEMBLY	https://www.gsea-msigdb.org/gsea/msigdb/human/geneset/GOBP_ADHERENS_JUNCTION_ASSEMBLY	ACTB	CTNNB1	DLG5	FER	HIPK1	JAM3	PAK2	PIP5K1C	RAMP2	SMAD7	TBCD	VCL	ZNF703
GOBP_ADHERENS_JUNCTION_MAINTENANCE	https://www.gsea-msigdb.org/gsea/msigdb/human/geneset/GOBP_ADHERENS_JUNCTION_MAINTENANCE	CAMSAP3	FERMT2	INAVA	KIFC3	MTSS1	PLEKHA7	TJP1
GOBP_ADHERENS_JUNCTION_ORGANIZATION	https://www.gsea-msigdb.org/gsea/msigdb/human/geneset/GOBP_ADHERENS_JUNCTION_ORGANIZATION	ACTB	ADAM10	ADD1	BMP6	CAMSAP3	CDC42	CDH1	CDH10	CDH11	CDH12	CDH13	CDH15	CDH17	CDH18	CDH19	CDH2	CDH20	CDH22	CDH24	CDH26	CDH3	CDH4	CDH5	CDH6	CDH7	CDH8	CDH9	CDHR3	CSK	CTNNB1	DLG5	DSP	EFNB2	EPHA4	FER	FERMT2	HIPK1	INAVA	JAM3	KIFC3	MTSS1	NUMB	NUMBL	PAK2	PIP5K1C	PLEC	PLEKHA7	PTPN23
GOBP_ADHESION_OF_SYMBIONT_TO_HOST	https://www.gsea-msigdb.org/gsea/msigdb/human/geneset/GOBP_ADHESION_OF_SYMBIONT_TO_HOST	ACE2	BPIFA1	CD209	CLEC4M	DPP4	GAS6	HSP90AB1	HSPD1	ICAM1	INHBB	LRRC15	LTF	NECTIN2	SCARB1
GOBP_ADHESION_OF_SYMBIONT_TO_HOST_CELL	https://www.gsea-msigdb.org/gsea/msigdb/human/geneset/GOBP_ADHESION_OF_SYMBIONT_TO_HOST_CELL	ACE2	CD209	CLEC4M	DPP4	GAS6	HSP90AB1	ICAM1	INHBB	LRRC15	NECTIN2
GOBP_ADIPONECTIN_ACTIVATED_SIGNALING_PATHWAY	https://www.gsea-msigdb.org/gsea/msigdb/human/geneset/GOBP_ADIPONECTIN_ACTIVATED_SIGNALING_PATHWAY	ACSL1	ADIPOR1	ADIPOR2	APPL1	APPL2	CSNK2B	SLC27A1
GOBP_ADIPOSE_TISSUE_DEVELOPMENT	https://www.gsea-msigdb.org/gsea/msigdb/human/geneset/GOBP_ADIPOSE_TISSUE_DEVELOPMENT	ABHD15	ACAT1	AMER1	ARID5B	ARRDC3	ATF2	BBS4	CASR	CSF1	DGAT2	DHRS7B	DYRK1B	EBF2	FOSL2	FTO	GHRL	HMGCS2	HRAS	HSD17B1	KLF7	LEP	LIPA	LPL	LRP5	MIR138-1	NAMPT	NCOA1	NCOA2	NR1H4	PARP1	PAXIP1	PGRMC2	PIK3CA	PLAAT3	POU4F2	PPARD	PPARG	PPARGC1A	PRKAA1	PUM2	RASAL2	RORC	SELENOM	SH3PXD2B	SIRT1	SLC25A25	SORL1	SOX8
GOBP_ADP_BIOSYNTHETIC_PROCESS	https://www.gsea-msigdb.org/gsea/msigdb/human/geneset/GOBP_ADP_BIOSYNTHETIC_PROCESS	AK1	AK2	AK3	AK4	AK5
GOBP_ADP_METABOLIC_PROCESS	https://www.gsea-msigdb.org/gsea/msigdb/human/geneset/GOBP_ADP_METABOLIC_PROCESS	AK1	AK2	AK3	AK4	AK5	BAD	NT5E	NUDT9
GOBP_ADP_TRANSPORT	https://www.gsea-msigdb.org/gsea/msigdb/human/geneset/GOBP_ADP_TRANSPORT	SLC17A9	SLC25A17	SLC25A23	SLC25A24	SLC25A25	SLC25A31	SLC25A4	SLC25A41	SLC25A42	SLC25A5	SLC25A6	SLC35B1
GOBP_ADRENAL_GLAND_DEVELOPMENT	https://www.gsea-msigdb.org/gsea/msigdb/human/geneset/GOBP_ADRENAL_GLAND_DEVELOPMENT	APOA1	ARID5B	ARMC5	ASCL1	CDKN1C	CITED2	CRH	CRHR1	CYP1B1	DKK3	INSM1	INSR	MDK	NF1	NR0B1	NR3C1	NR5A1	PBX1	PDGFRA	SALL1	SMAD2	SMAD3	SMAD4	STRA6	TSPO	WNT11	WNT4	WT1
GOBP_ADRENERGIC_RECEPTOR_SIGNALING_PATHWAY	https://www.gsea-msigdb.org/gsea/msigdb/human/geneset/GOBP_ADRENERGIC_RECEPTOR_SIGNALING_PATHWAY	ADCY9	ADRA1A	ADRA1B	ADRA1D	ADRA2A	ADRA2B	ADRA2C	ADRB1	ADRB2	ADRB3	AKAP13	ARRDC3	ATP2B4	CHGA	CRTC3	DRD1	DRD2	DRD3	DRD5	GNAI2	GPR101	GSK3A	KCNQ1	LMBRD2	MIR1-1	MIR133A1	MIR30E	PDE4B	PDE4D	PLN	RAPGEF2	RGS2	ZDHHC21
GOBP_ADULT_BEHAVIOR	https://www.gsea-msigdb.org/gsea/msigdb/human/geneset/GOBP_ADULT_BEHAVIOR	ABAT	ABHD12	ADAM2	AGRP	AGTPBP1	ALK	APP	ARCN1	ARRB2	ASIP	ATP1A2	ATP6V1B1	BBS1	BBS2	BBS4	BRS3	BTBD9	CACNB4	CARTPT	CCND2	CDK5	CEND1	CHD7	CHL1	CHRNA3	CHRNA4	CHRNA5	CHRNA7	CHRNB1	CHRNB2	CHRNB4	CLCN3	CLN8	CNP	CNTN2	CNTNAP2	CRHBP	CRHR1	CSTB	CTNS	CXCL12	DAB1	DBH	DMBX1	DMRT3	DRD1	DRD2	DRD3
GOBP_ADULT_FEEDING_BEHAVIOR	https://www.gsea-msigdb.org/gsea/msigdb/human/geneset/GOBP_ADULT_FEEDING_BEHAVIOR	AGRP	ASIP	BRS3	CARTPT	DMBX1	GHRL	GHSR	LEP	NPY	USP46
GOBP_ADULT_HEART_DEVELOPMENT	https://www.gsea-msigdb.org/gsea/msigdb/human/geneset/GOBP_ADULT_HEART_DEVELOPMENT	ADRA1A	APELA	APLNR	BMP10	CHD7	HAND2	MEF2D	MNAT1	MYH6	MYH7	NKX2-5	SCUBE1	TCAP
GOBP_ADULT_LOCOMOTORY_BEHAVIOR	https://www.gsea-msigdb.org/gsea/msigdb/human/geneset/GOBP_ADULT_LOCOMOTORY_BEHAVIOR	ABHD12	AGTPBP1	APP	ARCN1	ARRB2	ATP1A2	BTBD9	CACNB4	CCND2	CEND1	CHD7	CHL1	CLCN3	CLN8	CNP	CNTN2	CSTB	CTNS	CXCL12	DAB1	DMBX1	DMRT3	DRD1	DRD2	DRD4	EFNB3	EN1	EPHA4	EPS8	FGF12	FOXA2	FXN	GBX1	GDNF	GIGYF2	GIP	GLRA1	GLRB	GRIN2D	HEXA	HIPK2	HOXB8	HOXD10	HOXD9	HTRA2	INPP5F	KCNJ10	KLHL1
GOBP_AEROBIC_RESPIRATION	https://www.gsea-msigdb.org/gsea/msigdb/human/geneset/GOBP_AEROBIC_RESPIRATION	ABCD1	ACLY	ACO1	ACO2	ACTN3	ADSL	AFG1L	AK4	ANTKMT	ARL2	ATP5F1A	ATP5F1B	ATP5F1C	ATP5F1D	ATP5F1E	ATP5F1EP2	ATP5ME	ATP5MF	ATP5MG	ATP5PB	ATP5PD	ATP5PF	ATP5PO	ATP7A	ATPSCKMT	BID	BLOC1S1	BNIP3	C2orf69	CAT	CBFA2T3	CCNB1	CDK1	CHCHD10	CHCHD2	COA6	COQ9	COX10	COX15	COX4I1	COX4I2	COX5A	COX5B	COX6A1	COX6A2	COX6B1	COX6B2	COX6C
GOBP_AGGREPHAGY	https://www.gsea-msigdb.org/gsea/msigdb/human/geneset/GOBP_AGGREPHAGY	ACBD5	ATG5	BAG3	HSPB8	HTT	MAP1LC3C	SQSTM1	UBQLN1	WDFY3	WDR81
GOBP_AGGRESOME_ASSEMBLY	https://www.gsea-msigdb.org/gsea/msigdb/human/geneset/GOBP_AGGRESOME_ASSEMBLY	BAG3	HDAC6	PRKN	TRIM37	UBD	VCP
GOBP_AGGRESSIVE_BEHAVIOR	https://www.gsea-msigdb.org/gsea/msigdb/human/geneset/GOBP_AGGRESSIVE_BEHAVIOR	AVP	AVPR1A	GCNT4	KIRREL3	NR2E1	PENK	TACR1
GOBP_AIM2_INFLAMMASOME_COMPLEX_ASSEMBLY	https://www.gsea-msigdb.org/gsea/msigdb/human/geneset/GOBP_AIM2_INFLAMMASOME_COMPLEX_ASSEMBLY	AIM2	CASP1	GBP2	GBP5	PYDC5	TRIM11
GOBP_ALANINE_TRANSPORT	https://www.gsea-msigdb.org/gsea/msigdb/human/geneset/GOBP_ALANINE_TRANSPORT	SFXN1	SLC1A4	SLC36A1	SLC36A2	SLC36A3	SLC36A4	SLC38A1	SLC38A2	SLC38A3	SLC38A4	SLC38A5	SLC3A2	SLC6A14	SLC6A17	SLC6A6	SLC7A10	SLC7A5	SLC7A8
GOBP_ALCOHOL_BIOSYNTHETIC_PROCESS	https://www.gsea-msigdb.org/gsea/msigdb/human/geneset/GOBP_ALCOHOL_BIOSYNTHETIC_PROCESS	ABCA2	ABCG1	ABCG4	ACAA2	ACER1	ACER2	ACER3	ACLY	ADCYAP1R1	APOA1	APOB	APOE	AQP8	ARV1	ASAH1	ASAH2	AVPR1B	BMP2	BMP5	BMP6	CACNA1H	CD244	CES1	CFTR	CLCN2	CYB5R3	CYP11B1	CYP11B2	CYP27A1	CYP27B1	CYP2R1	CYP3A4	CYP51A1	CYP7A1	DAB2	DBH	DGKQ	DHCR24	DHCR7	DHDDS	DHFR	DHFRP1	DKK3	EBP	ERLIN1	ERLIN2	FDFT1	FDPS
GOBP_ALCOHOL_CATABOLIC_PROCESS	https://www.gsea-msigdb.org/gsea/msigdb/human/geneset/GOBP_ALCOHOL_CATABOLIC_PROCESS	ADH4	AKR1B10	AKR1C3	AKR1D1	ALDH1B1	ALDH2	ALDH3B1	ALDH3B2	APOE	CYP27A1	CYP39A1	CYP46A1	CYP7A1	GK	GK2	GK5	GPD2	HAO1	MIOX	NTSR1	NUDT3	SCARB1	SCARF1	SNX17	SORD	SRD5A3	SULT1A1	SULT1A2	SULT1A3	SULT1A4	SULT1B1	SULT1C4	SULT1E1	SULT2A1	TKFC	TPI1
GOBP_ALCOHOL_METABOLIC_PROCESS	https://www.gsea-msigdb.org/gsea/msigdb/human/geneset/GOBP_ALCOHOL_METABOLIC_PROCESS	ABCA1	ABCA2	ABCA5	ABCG1	ABCG4	ACAA2	ACADL	ACADVL	ACER1	ACER2	ACER3	ACLY	ACO2	ACP3	ACSS1	ACSS2	ADCYAP1R1	ADH1A	ADH1B	ADH1C	ADH4	ADH5	ADH6	ADH7	AKR1A1	AKR1B1	AKR1B10	AKR1B15	AKR1C1	AKR1C2	AKR1C3	AKR1C4	AKR1D1	AKR7A2	ALDH1A1	ALDH1A2	ALDH1A3	ALDH1B1	ALDH2	ALDH3A2	ALDH3B1	ALDH3B2	ALG1	ALG10	ALG10B	ALG12	ALG13	ALG14
GOBP_ALDEHYDE_BIOSYNTHETIC_PROCESS	https://www.gsea-msigdb.org/gsea/msigdb/human/geneset/GOBP_ALDEHYDE_BIOSYNTHETIC_PROCESS	BMP2	BMP5	BMP6	CACNA1H	CLCN2	CYP11B1	CYP11B2	DAB2	DKK3	KDM3A	PDXK	PNPO	REST	TKT	TPI1	WNT4
GOBP_ALDEHYDE_CATABOLIC_PROCESS	https://www.gsea-msigdb.org/gsea/msigdb/human/geneset/GOBP_ALDEHYDE_CATABOLIC_PROCESS	ADH4	ADH5	AGXT	AGXT2	AKR1A1	ALDH2	ALDH3B1	ESD	GATD1	HAGH	HOGA1	PARK7	PDXP	PNKD
GOBP_ALDITOL_BIOSYNTHETIC_PROCESS	https://www.gsea-msigdb.org/gsea/msigdb/human/geneset/GOBP_ALDITOL_BIOSYNTHETIC_PROCESS	GOT1	LEP	PCK1	PCK2	PGP
GOBP_ALDITOL_CATABOLIC_PROCESS	https://www.gsea-msigdb.org/gsea/msigdb/human/geneset/GOBP_ALDITOL_CATABOLIC_PROCESS	GK	GK2	GK5	GPD2	SORD	TKFC	TPI1
GOBP_ALDITOL_METABOLIC_PROCESS	https://www.gsea-msigdb.org/gsea/msigdb/human/geneset/GOBP_ALDITOL_METABOLIC_PROCESS	ANGPTL3	COQ2	COQ3	DGAT2	GALK1	GK	GK2	GK5	GOT1	GPD2	LEP	MOGAT1	MOGAT2	MOGAT3	PCK1	PCK2	PGP	PLA2G4A	SHPK	SORD	TKFC	TPI1
GOBP_ALDITOL_PHOSPHATE_METABOLIC_PROCESS	https://www.gsea-msigdb.org/gsea/msigdb/human/geneset/GOBP_ALDITOL_PHOSPHATE_METABOLIC_PROCESS	ABHD6	ACP6	GK	GK2	GK5	GPAM	GPAT2	GPAT3	GPD1	GPD1L	GPD2	RFK
GOBP_ALKALOID_METABOLIC_PROCESS	https://www.gsea-msigdb.org/gsea/msigdb/human/geneset/GOBP_ALKALOID_METABOLIC_PROCESS	BCHE	CYP1A2	CYP2D6	CYP3A4	CYP3A5	NNMT	TH
GOBP_ALLANTOIN_METABOLIC_PROCESS	https://www.gsea-msigdb.org/gsea/msigdb/human/geneset/GOBP_ALLANTOIN_METABOLIC_PROCESS	ADA	ALLC	GDA	NT5C	NT5C1A	NT5C2	PNP	URAD	XDH
GOBP_ALPHA_AMINO_ACID_CATABOLIC_PROCESS	https://www.gsea-msigdb.org/gsea/msigdb/human/geneset/GOBP_ALPHA_AMINO_ACID_CATABOLIC_PROCESS	AADAT	AASS	ACAD8	ACADSB	ACAT1	ACMSD	ADHFE1	AFMID	AGXT	AGXT2	ALDH4A1	ALDH6A1	ALDH8A1	AMT	ARG1	ARG2	ARHGAP11B	ASPA	ASRGL1	ATP2B4	AUH	BCAT2	BLMH	CBS	CDO1	CRYM	CSAD	DAO	DDAH1	DDAH2	DDO	DLST	ENSG00000274276	FAH	GAD1	GAD2	GCAT	GCSH	GLDC	GLS	GLS2	GLUD1	GLUD2	GLUL	GOT1	GOT2	GPT	GPT2
GOBP_ALPHA_AMINO_ACID_METABOLIC_PROCESS	https://www.gsea-msigdb.org/gsea/msigdb/human/geneset/GOBP_ALPHA_AMINO_ACID_METABOLIC_PROCESS	AADAT	AASDHPPT	AASS	ACAD8	ACADSB	ACAT1	ACMSD	ADHFE1	ADI1	ADSS1	ADSS2	AFMID	AGMAT	AGXT	AGXT2	ALDH18A1	ALDH4A1	ALDH5A1	ALDH6A1	ALDH8A1	AMDHD1	AMT	APIP	ARG1	ARG2	ARHGAP11B	ART4	ASL	ASNS	ASNSD1	ASPA	ASPG	ASRGL1	ASS1	ATCAY	ATF4	ATP2B4	ATP7A	AUH	AZIN1	AZIN2	BAAT	BCAT1	BCAT2	BHMT	BHMT2	BLMH	CAD
GOBP_ALPHA_BETA_T_CELL_ACTIVATION	https://www.gsea-msigdb.org/gsea/msigdb/human/geneset/GOBP_ALPHA_BETA_T_CELL_ACTIVATION	ABL1	ADA	ADORA2A	AGER	ANXA1	AP3B1	AP3D1	ARG2	ARMC5	ASCL2	ATF2	ATP7A	BATF	BCL11B	BCL2	BCL3	BCL6	BRAF	CARD11	CBFB	CBLB	CCL19	CCR2	CD160	CD247	CD274	CD28	CD300A	CD3D	CD3E	CD3G	CD55	CD80	CD81	CD83	CD86	CDH26	CLEC4A	CLEC4G	CRTAM	CTSL	DAPL1	DOCK2	EBI3	ELF4	ENTPD7	EOMES	FOSL2
GOBP_ALPHA_BETA_T_CELL_DIFFERENTIATION	https://www.gsea-msigdb.org/gsea/msigdb/human/geneset/GOBP_ALPHA_BETA_T_CELL_DIFFERENTIATION	ABL1	ADA	ANXA1	AP3B1	AP3D1	ARMC5	ASCL2	ATF2	ATP7A	BATF	BCL11B	BCL2	BCL3	BCL6	BRAF	CBFB	CCL19	CD80	CD83	CD86	CTSL	ENTPD7	EOMES	FOSL2	FOXP1	FOXP3	FUT7	GATA3	GLI3	GPR18	GPR183	HLA-DRA	HLA-DRB1	HLX	HMGB1	IFNG	IHH	IL12B	IL12RB1	IL18	IL18R1	IL2	IL21	IL23A	IL23R	IL27	IL2RG	IL4
GOBP_ALPHA_BETA_T_CELL_PROLIFERATION	https://www.gsea-msigdb.org/gsea/msigdb/human/geneset/GOBP_ALPHA_BETA_T_CELL_PROLIFERATION	ARG2	CARD11	CBLB	CCR2	CD274	CD28	CD3E	CD55	CD81	CLEC4G	DOCK2	EBI3	ELF4	FOXP3	HLA-A	HLA-E	IL12B	IL15	IL18	IL2	IL23A	IL2RA	IRF1	ITCH	JAK2	LGALS9	LGALS9B	LGALS9C	MAPK8IP1	NDFIP1	PRKCQ	PTPN22	PTPRC	RASAL3	RIPK2	SH3RF1	SLC4A2	SYK	TGFBR2	TNFRSF14	TNFSF4	TWSG1	TYK2	VSIR	XCL1	ZAP70	ZBTB7B
GOBP_ALPHA_KETOGLUTARATE_TRANSPORT	https://www.gsea-msigdb.org/gsea/msigdb/human/geneset/GOBP_ALPHA_KETOGLUTARATE_TRANSPORT	SLC13A2	SLC13A3	SLC13A5	SLC22A6	SLC22A7	SLC25A11	SLC25A21
GOBP_ALPHA_LINOLENIC_ACID_METABOLIC_PROCESS	https://www.gsea-msigdb.org/gsea/msigdb/human/geneset/GOBP_ALPHA_LINOLENIC_ACID_METABOLIC_PROCESS	ABCD1	ACAA1	ACOT8	ELOVL1	ELOVL2	ELOVL3	ELOVL5	FADS1	FADS2	SCP2
GOBP_ALTERNATIVE_MRNA_SPLICING_VIA_SPLICEOSOME	https://www.gsea-msigdb.org/gsea/msigdb/human/geneset/GOBP_ALTERNATIVE_MRNA_SPLICING_VIA_SPLICEOSOME	CDK13	CELF1	CELF2	CELF3	CELF4	CELF5	CELF6	DDX17	DDX5	DHX9	ESRP2	FAM172A	FMR1	FXR1	FXR2	HNRNPA1	HNRNPL	HNRNPM	HNRNPU	KDM1A	KHDRBS1	KHDRBS2	KHDRBS3	MAGOH	MYOD1	NCBP1	NCBP2	NOVA1	NOVA2	NSRP1	PQBP1	PTBP1	PUF60	RBFOX1	RBFOX2	RBFOX3	RBM11	RBM15	RBM15B	RBM17	RBM20	RBM24	RBM25	RBM4	RBM47	RBM5	RBM7	RBM8A
GOBP_AMACRINE_CELL_DIFFERENTIATION	https://www.gsea-msigdb.org/gsea/msigdb/human/geneset/GOBP_AMACRINE_CELL_DIFFERENTIATION	BARHL2	DLX1	DLX2	FOXN4	GDF11	HES1	NEUROD1	NEUROD4	POU4F2	PTF1A	RORB	TGIF2
GOBP_AMEBOIDAL_TYPE_CELL_MIGRATION	https://www.gsea-msigdb.org/gsea/msigdb/human/geneset/GOBP_AMEBOIDAL_TYPE_CELL_MIGRATION	AAMP	ABL1	ACTA2	ACVR1	ACVR1B	ACVR1C	ACVRL1	ADAM17	ADAM9	ADAMTS9	ADGRA2	ADGRB1	ADIPOR1	ADTRP	AGO2	AGT	AGTR2	AKAP12	AKT1	AKT3	AMOT	AMOTL1	AMOTL2	ANGPT1	ANGPT2	ANGPT4	ANLN	ANXA1	ANXA3	ANXA6	APELA	APOA1	APOE	APOH	APPL1	APPL2	AQP1	ARF6	ARHGAP4	ARHGAP5	ARHGDIB	ARHGEF7	ARID5B	ARSB	ATOH8	ATP2B4	ATP5F1A	ATP5F1B
GOBP_AMELOBLAST_DIFFERENTIATION	https://www.gsea-msigdb.org/gsea/msigdb/human/geneset/GOBP_AMELOBLAST_DIFFERENTIATION	BMP2	BMP4	BMP7	ENAM	FST
GOBP_AMELOGENESIS	https://www.gsea-msigdb.org/gsea/msigdb/human/geneset/GOBP_AMELOGENESIS	AMELX	AMELY	AMTN	CFTR	CNNM4	CSF3R	DMP1	ENAM	FAM20A	FAM20C	ITGB6	KLK4	KLK5	MMP20	MSX2	NECTIN1	ODAPH	PERP	PPARA	RELT	SLC24A4	SLC4A2	STIM1	TBX1	TCIRG1	WDR72
GOBP_AMIDE_BIOSYNTHETIC_PROCESS	https://www.gsea-msigdb.org/gsea/msigdb/human/geneset/GOBP_AMIDE_BIOSYNTHETIC_PROCESS	AANAT	AARS1	AARS2	AARSD1	AASDH	ABCA8	ABCE1	ABCF1	ABTB1	ACACA	ACACB	ACAT1	ACLY	ACO1	ACSBG1	ACSBG2	ACSF3	ACSL1	ACSL3	ACSL4	ACSL5	ACSL6	ACSS1	ACSS2	AGK	AGMAT	AGO1	AGO2	AGO3	AGO4	AIMP1	AIMP2	AIRE	AJUBA	AKT1	AKT2	ALKBH1	ALOX12B	ALOXE3	ANG	ANKZF1	APEH	APLP1	APP	ARG1	ARG2	ASAH1	ASAH2
GOBP_AMIDE_CATABOLIC_PROCESS	https://www.gsea-msigdb.org/gsea/msigdb/human/geneset/GOBP_AMIDE_CATABOLIC_PROCESS	AADAT	AASS	ADA	ALDH4A1	ALLC	AMDHD1	DLST	FTCD	GDA	HAL	NIT1	NT5C	OAT	PIPOX	PM20D1	PRODH	PRODH2	TDO2	UROC1	XDH
GOBP_AMIDE_METABOLIC_PROCESS	https://www.gsea-msigdb.org/gsea/msigdb/human/geneset/GOBP_AMIDE_METABOLIC_PROCESS	AADAT	AANAT	AARS1	AARS2	AARSD1	AASDH	AASDHPPT	AASS	ABCA12	ABCA2	ABCA7	ABCA8	ABCB9	ABCD1	ABCE1	ABCF1	ABCG1	ABHD4	ABTB1	ACACA	ACACB	ACAT1	ACE	ACE2	ACER1	ACER2	ACER3	ACLY	ACO1	ACOT1	ACOT11	ACOT12	ACOT2	ACOT4	ACOT6	ACOT7	ACOT8	ACOT9	ACSBG1	ACSBG2	ACSF2	ACSF3	ACSL1	ACSL3	ACSL4	ACSL5	ACSL6	ACSM1
GOBP_AMIDE_TRANSPORT	https://www.gsea-msigdb.org/gsea/msigdb/human/geneset/GOBP_AMIDE_TRANSPORT	AACS	ABAT	ABCA1	ABCA12	ABCA13	ABCA2	ABCB1	ABCB4	ABCB8	ABCB9	ABCC5	ABCC8	ABCD1	ABCG2	ACSL4	ACVR1C	ACVR2B	ADCY5	ADCY8	ADCYAP1	ADORA1	ADORA2A	ADRA2A	AIMP1	ALOX5	ANO1	ANXA1	APBA1	AQP1	AQP10	AQP11	AQP3	AQP7	AQP7B	AQP7P3	AQP8	AQP9	ARL6IP1	ARL6IP5	ATP1A2	AVP	AVPR1A	BAD	BAIAP3	BLK	BMAL1	BMP8A	BRSK2
GOBP_AMINE_BIOSYNTHETIC_PROCESS	https://www.gsea-msigdb.org/gsea/msigdb/human/geneset/GOBP_AMINE_BIOSYNTHETIC_PROCESS	AANAT	AGMAT	ALDH2	AMD1	ASMT	AZIN1	AZIN2	DAO	DBH	DDC	GATA3	GCH1	GPR37	HAND2	HDC	INSM1	KL	MOXD1	MOXD2P	NR4A2	OAZ1	OAZ2	OAZ3	ODC1	PAH	PAOX	PARK7	PNMT	PRG3	SAT1	SAT2	SLC6A3	SMOX	SMS	SNCA	SRM	SULT1A2	TGFB2	TH	VPS35
GOBP_AMINE_CATABOLIC_PROCESS	https://www.gsea-msigdb.org/gsea/msigdb/human/geneset/GOBP_AMINE_CATABOLIC_PROCESS	ALDH7A1	ATP2B4	CHDH	COMT	DBH	DHPS	DMGDH	HNMT	MAOA	MAOB	MIR21	MOXD1	MOXD2P	PAOX	SAT1	SLC44A1	SLC6A3	SMOX	SULT1A3	SULT1A4
GOBP_AMINE_METABOLIC_PROCESS	https://www.gsea-msigdb.org/gsea/msigdb/human/geneset/GOBP_AMINE_METABOLIC_PROCESS	AANAT	ABAT	ACMSD	AFMID	AGMAT	ALDH2	ALDH7A1	AMD1	AOC1	AOC2	AOC3	ASMT	ATCAY	ATP2B4	ATP7A	AZIN1	AZIN2	BCKDK	BHMT	CHDH	CHRNB2	CLN3	COMT	CYP1A1	DAO	DBH	DDC	DHPS	DMGDH	DRD1	DRD2	DRD3	DRD4	EDNRA	EPAS1	GATA3	GCDH	GCH1	GDE1	GDPD1	GDPD3	GNAT2	GPR37	GRIN2A	HAAO	HAND2	HDAC10	HDAC6
GOBP_AMINE_TRANSPORT	https://www.gsea-msigdb.org/gsea/msigdb/human/geneset/GOBP_AMINE_TRANSPORT	ABAT	ACE2	ADORA1	ADORA2A	ADORA3	ADRA2A	ADRA2B	ADRA2C	AQP8	AQP9	ARL6IP1	ARL6IP5	ATP1A2	AVP	AVPR1A	CARTPT	CHGA	CHRNA3	CHRNA4	CHRNA6	CHRNA7	CHRNB2	CLTRN	CNR1	CRH	CXCL12	DRD1	DRD2	DRD3	DRD4	DTNBP1	FFAR3	FGF20	GABBR1	GDNF	GHSR	GRK2	GRM2	GRM7	HRH3	HTR1B	HTR2A	ITGB1	KCNA2	KCNB1	KMO	LEP	NPY5R
GOBP_AMINOACYL_TRNA_METABOLISM_INVOLVED_IN_TRANSLATIONAL_FIDELITY	https://www.gsea-msigdb.org/gsea/msigdb/human/geneset/GOBP_AMINOACYL_TRNA_METABOLISM_INVOLVED_IN_TRANSLATIONAL_FIDELITY	AARS1	AARS2	AARSD1	DTD1	DTD2	IARS1	IARS2	LARS1	LARS2	PRORSD1P	TARS2	VARS1	VARS2
GOBP_AMINOGLYCAN_BIOSYNTHETIC_PROCESS	https://www.gsea-msigdb.org/gsea/msigdb/human/geneset/GOBP_AMINOGLYCAN_BIOSYNTHETIC_PROCESS	ABCC5	ANGPT1	AP2A1	B3GALT6	B3GAT1	B3GAT3	B3GNT2	B3GNT3	B3GNT4	B3GNT7	B3GNT8	B4GALT4	B4GALT5	B4GALT7	B4GAT1	CEMIP	CHPF	CHPF2	CHST1	CHST11	CHST12	CHST13	CHST14	CHST15	CHST2	CHST3	CHST5	CHST6	CHST7	CHST9	CHSY1	CHSY3	CLTC	CSGALNACT1	CSGALNACT2	DSE	DSEL	EGF	EXT1	EXT2	GALNT5	GCNT2	GLCE	HAS1	HAS2	HAS3	HEXA	HS3ST1
GOBP_AMINOGLYCAN_CATABOLIC_PROCESS	https://www.gsea-msigdb.org/gsea/msigdb/human/geneset/GOBP_AMINOGLYCAN_CATABOLIC_PROCESS	CD44	CEMIP	CEMIP2	CHI3L1	CHI3L2	CHIA	CHIT1	CTBS	FGF2	FUCA1	GLB1	GNS	GUSB	HEXA	HEXB	HMMR	HYAL1	HYAL2	HYAL3	HYAL4	IDS	IDUA	LYG1	LYG2	LYVE1	OVGP1	PGLYRP1	PGLYRP2	PGLYRP3	PGLYRP4	SGSH	SPAM1	STAB2	TGFB1
GOBP_AMINOGLYCAN_METABOLIC_PROCESS	https://www.gsea-msigdb.org/gsea/msigdb/human/geneset/GOBP_AMINOGLYCAN_METABOLIC_PROCESS	ABCC5	ANGPT1	AP2A1	B3GALT6	B3GAT1	B3GAT3	B3GNT2	B3GNT3	B3GNT4	B3GNT7	B3GNT8	B4GALT4	B4GALT5	B4GALT7	B4GAT1	BPNT2	CD44	CEMIP	CEMIP2	CHI3L1	CHI3L2	CHIA	CHIT1	CHPF	CHPF2	CHST1	CHST11	CHST12	CHST13	CHST14	CHST15	CHST2	CHST3	CHST5	CHST6	CHST7	CHST9	CHSY1	CHSY3	CLN6	CLTC	CSGALNACT1	CSGALNACT2	CTBS	DSE	DSEL	EDNRA	EDNRB
GOBP_AMINOGLYCOSIDE_ANTIBIOTIC_METABOLIC_PROCESS	https://www.gsea-msigdb.org/gsea/msigdb/human/geneset/GOBP_AMINOGLYCOSIDE_ANTIBIOTIC_METABOLIC_PROCESS	AKR1A1	AKR1B1	AKR1B10	AKR1C1	AKR1C2	AKR1C3	AKR1C4	AKR7A2	CBR4	SLC34A1
GOBP_AMINOPHOSPHOLIPID_TRANSLOCATION	https://www.gsea-msigdb.org/gsea/msigdb/human/geneset/GOBP_AMINOPHOSPHOLIPID_TRANSLOCATION	ATP11A	ATP11C	ATP8A1	ATP8A2	ATP8B1	TMEM30A	TMEM30B
GOBP_AMINOPHOSPHOLIPID_TRANSPORT	https://www.gsea-msigdb.org/gsea/msigdb/human/geneset/GOBP_AMINOPHOSPHOLIPID_TRANSPORT	ATP11A	ATP11B	ATP11C	ATP8A1	ATP8A2	ATP8B1	SCARB2	TMEM30A	TMEM30B
GOBP_AMINO_ACID_ACTIVATION	https://www.gsea-msigdb.org/gsea/msigdb/human/geneset/GOBP_AMINO_ACID_ACTIVATION	AARS1	AARS2	AARSD1	AASDH	CARS1	CARS2	DALRD3	DARS1	DARS2	EARS2	EPRS1	FARS2	FARSA	FARSB	GARS1	GATB	GATC	HARS1	HARS2	IARS1	IARS2	KARS1	LARS1	LARS2	LRRC47	MARS1	MARS2	NARS1	NARS2	PARS2	QARS1	QRSL1	RARS1	RARS2	SARS1	SARS2	TARS1	TARS2	TARS3	VARS1	VARS2	WARS1	WARS2	YARS1	YARS2
GOBP_AMINO_ACID_BETAINE_BIOSYNTHETIC_PROCESS	https://www.gsea-msigdb.org/gsea/msigdb/human/geneset/GOBP_AMINO_ACID_BETAINE_BIOSYNTHETIC_PROCESS	ACADM	ALDH7A1	ALDH9A1	BBOX1	CHDH	TMLHE
GOBP_AMINO_ACID_BETAINE_METABOLIC_PROCESS	https://www.gsea-msigdb.org/gsea/msigdb/human/geneset/GOBP_AMINO_ACID_BETAINE_METABOLIC_PROCESS	ACADL	ACADM	ALDH7A1	ALDH9A1	BBOX1	BHMT	BHMT2	CHDH	CPT1A	CPT1B	CPT1C	CPT2	CRAT	CROT	DMGDH	SLC22A4	TMLHE
GOBP_AMINO_ACID_BETAINE_TRANSPORT	https://www.gsea-msigdb.org/gsea/msigdb/human/geneset/GOBP_AMINO_ACID_BETAINE_TRANSPORT	PDZK1	SLC16A9	SLC22A1	SLC22A15	SLC22A16	SLC22A4	SLC22A5	SLC25A20	SLC25A29	SLC38A2	SLC6A12	SLC6A14	SLC6A20	SLC7A6
GOBP_AMINO_ACID_BIOSYNTHETIC_PROCESS	https://www.gsea-msigdb.org/gsea/msigdb/human/geneset/GOBP_AMINO_ACID_BIOSYNTHETIC_PROCESS	AASDHPPT	AASS	ABAT	ADI1	AGXT	AGXT2	ALDH18A1	ALDH1A1	APIP	ASL	ASNS	ASNSD1	ASS1	ATP2B4	BCAT1	BCAT2	BHMT	BHMT2	CAD	CBS	CLN3	CPS1	CTH	DHFR	DHFR2	DHFRP1	DPYD	ENOPH1	ENSG00000274276	GAD1	GAD2	GGT1	GLS	GLS2	GLUD1	GLUD2	GLUL	GOT1	GOT1L1	GOT2	HAO1	ILVBL	LGSN	MRI1	MTAP	MTHFD1	MTHFD2L	MTHFR
GOBP_AMINO_ACID_CATABOLIC_PROCESS	https://www.gsea-msigdb.org/gsea/msigdb/human/geneset/GOBP_AMINO_ACID_CATABOLIC_PROCESS	AADAT	AASS	ABAT	ACAD8	ACADSB	ACAT1	ACMSD	ADHFE1	AFMID	AGXT	AGXT2	ALDH4A1	ALDH5A1	ALDH6A1	ALDH8A1	AMDHD1	AMT	ARG1	ARG2	ARHGAP11B	ASPA	ASRGL1	ATP2B4	AUH	BCAT2	BCKDHA	BCKDHB	BCKDK	BLMH	CARNMT1	CARNS1	CBS	CDO1	CRYM	CSAD	DAO	DBT	DDAH1	DDAH2	DDO	DLD	DLST	ECHS1	ENOSF1	ENSG00000274276	ETFA	ETFB	FAH
GOBP_AMINO_ACID_IMPORT_ACROSS_PLASMA_MEMBRANE	https://www.gsea-msigdb.org/gsea/msigdb/human/geneset/GOBP_AMINO_ACID_IMPORT_ACROSS_PLASMA_MEMBRANE	ACE2	ARL6IP1	ARL6IP5	ATP1A2	CLN8	CLTRN	GFAP	GRM1	ITGB1	KCNJ10	NTSR1	PER2	PSEN1	RGS2	RGS4	SLC16A2	SLC17A8	SLC1A1	SLC1A2	SLC1A3	SLC1A4	SLC1A5	SLC1A6	SLC22A2	SLC22A4	SLC36A1	SLC36A4	SLC38A1	SLC38A2	SLC38A3	SLC38A4	SLC38A5	SLC3A2	SLC43A1	SLC43A2	SLC47A1	SLC6A13	SLC6A14	SLC6A20	SLC6A5	SLC6A6	SLC6A9	SLC7A1	SLC7A11	SLC7A2	SLC7A3	SLC7A5	SLC7A8
GOBP_AMINO_ACID_METABOLIC_PROCESS	https://www.gsea-msigdb.org/gsea/msigdb/human/geneset/GOBP_AMINO_ACID_METABOLIC_PROCESS	AADAT	AARS1	AARS2	AARSD1	AASDH	AASDHPPT	AASS	ABAT	ACAD8	ACADSB	ACAT1	ACCS	ACCSL	ACMSD	ACY1	ADHFE1	ADI1	ADSS1	ADSS2	AFMID	AGMAT	AGXT	AGXT2	ALDH18A1	ALDH1A1	ALDH4A1	ALDH5A1	ALDH6A1	ALDH8A1	AMDHD1	AMT	APIP	ARG1	ARG2	ARHGAP11B	ART4	ASL	ASNS	ASNSD1	ASPA	ASPG	ASRGL1	ASS1	ATCAY	ATF4	ATP2B4	ATP7A	AUH
GOBP_AMINO_ACID_NEUROTRANSMITTER_REUPTAKE	https://www.gsea-msigdb.org/gsea/msigdb/human/geneset/GOBP_AMINO_ACID_NEUROTRANSMITTER_REUPTAKE	ATP1A2	CLN8	ITGB1	KCNJ10	PER2	SLC17A8	SLC6A1	SLC6A11	SLC6A12	SLC6A13
GOBP_AMINO_ACID_SALVAGE	https://www.gsea-msigdb.org/gsea/msigdb/human/geneset/GOBP_AMINO_ACID_SALVAGE	ADI1	APIP	BHMT	BHMT2	ENOPH1	MRI1	MTAP
GOBP_AMINO_ACID_TRANSMEMBRANE_TRANSPORT	https://www.gsea-msigdb.org/gsea/msigdb/human/geneset/GOBP_AMINO_ACID_TRANSMEMBRANE_TRANSPORT	ACE2	ARL6IP1	ARL6IP5	ATP1A2	CLN3	CLN8	CLTRN	GFAP	GRM1	ITGB1	KCNJ10	LRRC8A	LRRC8C	LRRC8D	LRRC8E	MFSD12	NTSR1	PER2	PRAF2	PSEN1	RGS2	RGS4	SFXN1	SFXN2	SFXN3	SLC11A1	SLC15A4	SLC16A10	SLC16A2	SLC17A6	SLC17A7	SLC17A8	SLC1A1	SLC1A2	SLC1A3	SLC1A4	SLC1A5	SLC1A6	SLC1A7	SLC22A2	SLC22A4	SLC25A12	SLC25A13	SLC25A15	SLC25A18	SLC25A2	SLC25A22	SLC25A26
GOBP_AMINO_ACID_TRANSPORT	https://www.gsea-msigdb.org/gsea/msigdb/human/geneset/GOBP_AMINO_ACID_TRANSPORT	ABAT	ABCC8	ACE2	ADORA1	ADORA2A	APBA1	ARL6IP1	ARL6IP5	ATP1A2	AVP	AVPR1A	CACNB4	CLN3	CLN8	CLTRN	CTNS	DTNBP1	GABBR1	GFAP	GIPC1	GJA1	GNAT2	GRM1	GRM2	GRM7	HRH3	HTR1B	ITGB1	KCNJ10	KCNJ8	KMO	LEP	LLGL2	LRP5	LRRC8A	LRRC8C	LRRC8D	LRRC8E	MFSD12	NF1	NHERF1	NPY5R	NTRK2	NTSR1	P2RX7	PDPN	PER2	PRAF2
GOBP_AMINO_SUGAR_BIOSYNTHETIC_PROCESS	https://www.gsea-msigdb.org/gsea/msigdb/human/geneset/GOBP_AMINO_SUGAR_BIOSYNTHETIC_PROCESS	AMDHD2	GFPT1	GFPT2	GNE	GNPDA1	GNPDA2	GNPNAT1	NANP	PGM3	UAP1	UAP1L1
GOBP_AMINO_SUGAR_CATABOLIC_PROCESS	https://www.gsea-msigdb.org/gsea/msigdb/human/geneset/GOBP_AMINO_SUGAR_CATABOLIC_PROCESS	ALDH1A1	AMDHD2	CHI3L1	CHI3L2	CHIA	CHIT1	CTBS	GNPDA1	GNPDA2	HOGA1	MGAT1	NAGK	NPL	OVGP1	RENBP
GOBP_AMINO_SUGAR_METABOLIC_PROCESS	https://www.gsea-msigdb.org/gsea/msigdb/human/geneset/GOBP_AMINO_SUGAR_METABOLIC_PROCESS	ALDH1A1	AMDHD2	B4GALNT2	CHI3L1	CHI3L2	CHIA	CHIT1	CHST1	CHST2	CHST3	CHST4	CHST5	CHST6	CHST7	CMAS	CSGALNACT1	CTBS	DPAGT1	EXTL2	FN3K	GFPT1	GFPT2	GNE	GNPDA1	GNPDA2	GNPNAT1	HOGA1	LARGE1	MGAT1	MGAT3	NAGK	NANP	NPL	OGA	OVGP1	PGM3	RENBP	SLC35A3	ST3GAL1	ST6GAL1	UAP1	UAP1L1
GOBP_AMMONIUM_HOMEOSTASIS	https://www.gsea-msigdb.org/gsea/msigdb/human/geneset/GOBP_AMMONIUM_HOMEOSTASIS	OTC	RHAG	RHBG	RHCE	RHCG	RHD
GOBP_AMMONIUM_ION_METABOLIC_PROCESS	https://www.gsea-msigdb.org/gsea/msigdb/human/geneset/GOBP_AMMONIUM_ION_METABOLIC_PROCESS	ALDH2	ALDH7A1	ATP7A	BCHE	BTBD9	CHDH	DDC	DMGDH	ENPP6	GRIN2A	HDC	HNMT	HTR1A	PDE1B	PRG3	RNF180	SLC22A3	SLC29A4	SLC44A1	SRD5A1	TPH1	TPH2	TRH
GOBP_AMMONIUM_TRANSMEMBRANE_TRANSPORT	https://www.gsea-msigdb.org/gsea/msigdb/human/geneset/GOBP_AMMONIUM_TRANSMEMBRANE_TRANSPORT	AQP1	AQP8	RHAG	RHBG	RHCE	RHCG	RHD	SLC12A2	SLC12A4	SLC12A5	SLC12A6	SLC12A7
GOBP_AMPA_GLUTAMATE_RECEPTOR_CLUSTERING	https://www.gsea-msigdb.org/gsea/msigdb/human/geneset/GOBP_AMPA_GLUTAMATE_RECEPTOR_CLUSTERING	APOE	CHRDL1	DLG4	FRRS1L	NLGN1	SHANK3	SHISA6	SHISA7	SLC7A11	SSH1	ZDHHC2
GOBP_AMP_BIOSYNTHETIC_PROCESS	https://www.gsea-msigdb.org/gsea/msigdb/human/geneset/GOBP_AMP_BIOSYNTHETIC_PROCESS	ADA	ADK	ADSL	ADSS1	ADSS2	APRT	ATIC	GART	HPRT1	NUDT2	PAICS	PFAS	PPAT
GOBP_AMP_CATABOLIC_PROCESS	https://www.gsea-msigdb.org/gsea/msigdb/human/geneset/GOBP_AMP_CATABOLIC_PROCESS	ADA	AMPD3	NT5C1A	NT5E	XDH
GOBP_AMP_METABOLIC_PROCESS	https://www.gsea-msigdb.org/gsea/msigdb/human/geneset/GOBP_AMP_METABOLIC_PROCESS	ADA	ADK	ADSL	ADSS1	ADSS2	AK1	AK2	AK3	AK4	AMPD1	AMPD2	AMPD3	APRT	ATIC	GART	HPRT1	NT5C1A	NT5E	NUDT2	PAICS	PFAS	PPAT	XDH
GOBP_AMP_SALVAGE	https://www.gsea-msigdb.org/gsea/msigdb/human/geneset/GOBP_AMP_SALVAGE	ADA	ADK	ADSL	APRT	HPRT1
GOBP_AMYGDALA_DEVELOPMENT	https://www.gsea-msigdb.org/gsea/msigdb/human/geneset/GOBP_AMYGDALA_DEVELOPMENT	ATP1A2	NF1	NR2E1	TBR1	UBA6
GOBP_AMYLIN_RECEPTOR_SIGNALING_PATHWAY	https://www.gsea-msigdb.org/gsea/msigdb/human/geneset/GOBP_AMYLIN_RECEPTOR_SIGNALING_PATHWAY	ADM	CALCR	IAPP	RAMP1	RAMP2	RAMP3
GOBP_AMYLOID_BETA_CLEARANCE	https://www.gsea-msigdb.org/gsea/msigdb/human/geneset/GOBP_AMYLOID_BETA_CLEARANCE	ABCA7	APOE	C3	C5AR1	CD36	CLTC	CLU	CYP51A1	HDAC1	HMGCR	IDE	IFNG	IFNGR1	IGF1R	IL4	INSR	ITGAM	ITGB2	LDLR	LRP1	LRP2	LRP4	LRPAP1	MARCO	MIR1908	MIR34A	MME	MSR1	MYOCD	PICALM	PLA2G3	RAB11A	RAB11B	RAB5A	ROCK1	SRF	TNF	TREM2	TTPA
GOBP_AMYLOID_BETA_CLEARANCE_BY_CELLULAR_CATABOLIC_PROCESS	https://www.gsea-msigdb.org/gsea/msigdb/human/geneset/GOBP_AMYLOID_BETA_CLEARANCE_BY_CELLULAR_CATABOLIC_PROCESS	ABCA7	CD36	IDE	LDLR	LRP1	LRP4	MME	TREM2
GOBP_AMYLOID_BETA_CLEARANCE_BY_TRANSCYTOSIS	https://www.gsea-msigdb.org/gsea/msigdb/human/geneset/GOBP_AMYLOID_BETA_CLEARANCE_BY_TRANSCYTOSIS	CLTC	LRP1	LRPAP1	PICALM	RAB11A	RAB11B	RAB5A
GOBP_AMYLOID_BETA_METABOLIC_PROCESS	https://www.gsea-msigdb.org/gsea/msigdb/human/geneset/GOBP_AMYLOID_BETA_METABOLIC_PROCESS	ABCA2	ABCA7	ABCG1	ACE	APEH	APH1A	APH1B	APOE	BACE1	BACE2	BECN1	BIN1	CASP3	CHRNA7	CLU	CSNK1E	DYRK1A	EFNA1	EPHA4	GGA3	GSAP	GSK3A	HAP1	IDE	IFNG	IFNGR1	IGF1	LRRTM3	MGAT3	MIR153-1	MIR15B	MIR186	MIR206	MIR24-1	MIR298	MIR29A	MIR29B1	MIR29C	MIR339	MIR361	MIR455	MME	NAT8B	NCSTN	NTRK2	PICALM	PIN1	PRNP
GOBP_AMYLOID_FIBRIL_FORMATION	https://www.gsea-msigdb.org/gsea/msigdb/human/geneset/GOBP_AMYLOID_FIBRIL_FORMATION	APOE	APP	B2M	BACE1	CAMP	CD36	CDSN	CHRNA7	CLU	CRYAB	FKBP1A	FURIN	FUS	GSN	HNRNPA1	IAPP	LDLR	MAPT	MDM2	MIR31	NAT8	NAT8B	PFDN1	PFDN2	PFDN4	PFDN5	PFDN6	PRKN	PSEN1	RIPK1	RIPK3	SERF1A	SERF1B	SIAH1	SIAH2	SNCA	TARDBP	TREM2	USP8	USP9X	VBP1	VHL
GOBP_AMYLOID_PRECURSOR_PROTEIN_BIOSYNTHETIC_PROCESS	https://www.gsea-msigdb.org/gsea/msigdb/human/geneset/GOBP_AMYLOID_PRECURSOR_PROTEIN_BIOSYNTHETIC_PROCESS	AATF	ABCA2	ABCA7	AGO2	BACE2	ITM2A	ITM2B	ITM2C	MIR101-1	MIR106A	MIR144	MIR147A	MIR153-1	MIR17	MIR20A	MIR298	MIR31	MIR323A	MIR455	MIR520C	MIR644A	NCSTN	NECAB1	NECAB2	NECAB3	PAWR	SOAT1
GOBP_AMYLOID_PRECURSOR_PROTEIN_CATABOLIC_PROCESS	https://www.gsea-msigdb.org/gsea/msigdb/human/geneset/GOBP_AMYLOID_PRECURSOR_PROTEIN_CATABOLIC_PROCESS	ABCA2	ABCA7	ABCG1	ADAM10	ADAM17	ADAM19	AGER	APH1A	APH1B	APOE	BACE1	BIN1	CASP3	CHRNA7	CLN3	CLU	CSNK1E	DHCR24	DYRK1A	EFNA1	EFNA3	EPHA4	FKBP1A	FLOT2	GGA3	GSAP	GSK3A	HAP1	IFNG	IFNGR1	IGF1	LRRTM3	LYN	MIR107	MIR153-1	MIR15B	MIR186	MIR206	MIR24-1	MIR298	MIR29A	MIR29B1	MIR29C	MIR339	MIR361	MIR455	NCSTN	NTRK2
GOBP_AMYLOID_PRECURSOR_PROTEIN_METABOLIC_PROCESS	https://www.gsea-msigdb.org/gsea/msigdb/human/geneset/GOBP_AMYLOID_PRECURSOR_PROTEIN_METABOLIC_PROCESS	AATF	ABCA2	ABCA7	ABCG1	ACHE	ADAM10	ADAM17	ADAM19	AGER	AGO2	APH1A	APH1B	APOE	BACE1	BACE2	BIN1	CASP3	CHRNA7	CLN3	CLU	CSNK1E	DHCR24	DLG1	DYRK1A	EFNA1	EFNA3	EPHA4	FKBP1A	FLOT2	GGA3	GSAP	GSK3A	HAP1	IFNG	IFNGR1	IGF1	ITM2A	ITM2B	ITM2C	KLK6	LDLRAP1	LRRTM3	LYN	MIR101-1	MIR106A	MIR107	MIR144	MIR147A
GOBP_ANAGEN	https://www.gsea-msigdb.org/gsea/msigdb/human/geneset/GOBP_ANAGEN	CTNNB1	FERMT1	SPINK5	WNT10B	WNT5A
GOBP_ANAPHASE_PROMOTING_COMPLEX_DEPENDENT_CATABOLIC_PROCESS	https://www.gsea-msigdb.org/gsea/msigdb/human/geneset/GOBP_ANAPHASE_PROMOTING_COMPLEX_DEPENDENT_CATABOLIC_PROCESS	ANAPC1	ANAPC10	ANAPC11	ANAPC13	ANAPC15	ANAPC16	ANAPC2	ANAPC4	ANAPC5	ANAPC7	CDC16	CDC20	CDC20B	CDC23	CDC26	CDC27	CDK2	CUL3	ECRG4	FBXO31	FZR1	PLK1	UBE2C	UBE2S
GOBP_ANATOMICAL_STRUCTURE_ARRANGEMENT	https://www.gsea-msigdb.org/gsea/msigdb/human/geneset/GOBP_ANATOMICAL_STRUCTURE_ARRANGEMENT	BMPR1A	DAB1	DLL1	EGR2	HOXB1	HOXB2	HSPA5	KCNA2	KIF14	NRP1	NRP2	PAX2	PLXNA3	PLXNA4	SEMA3F	TFAP2A
GOBP_ANATOMICAL_STRUCTURE_FORMATION_INVOLVED_IN_MORPHOGENESIS	https://www.gsea-msigdb.org/gsea/msigdb/human/geneset/GOBP_ANATOMICAL_STRUCTURE_FORMATION_INVOLVED_IN_MORPHOGENESIS	AAMP	ABCA2	ABCC8	ABI1	ABL1	ACE	ACKR3	ACRBP	ACTA1	ACTC1	ACTG1	ACTL6A	ACTL7A	ACTL8	ACTL9	ACTN1	ACTN2	ACVR1	ACVR2B	ACVRL1	ADA	ADAM12	ADAM15	ADAM17	ADAM8	ADAM9	ADAMTS1	ADAMTS15	ADAMTS5	ADAMTS9	ADGRA2	ADGRB1	ADGRB2	ADGRB3	ADGRG1	ADGRG6	ADIPOR2	ADM	ADM2	ADPRHL1	ADRA2B	ADTRP	AGFG1	AGGF1	AGO1	AGO2	AGTPBP1	AGTR1
GOBP_ANATOMICAL_STRUCTURE_MATURATION	https://www.gsea-msigdb.org/gsea/msigdb/human/geneset/GOBP_ANATOMICAL_STRUCTURE_MATURATION	ABHD2	ACTL6B	ACTN3	ACVRL1	ADAMTS12	ADAMTS7	ADGRB3	AGRN	AKR1B1	ALDH1A2	ANG	ANGPTL8	ANKRD17	ANKS1A	APP	ARCN1	ASCL1	ATP6AP2	AURKA	AXL	B4GALT5	B4GALT6	BAIAP3	BAP1	BCL11A	BCL2	BFSP1	BFSP2	BHLHA15	BMP2	BNC1	BRCA2	BRD1	BSPH1	BTK	C1QA	C1QL1	C2CD6	C3	CABYR	CATSPER2	CATSPER3	CATSPER4	CATSPERD	CATSPERE	CATSPERZ	CBFB	CCDC154
GOBP_ANATOMICAL_STRUCTURE_REGRESSION	https://www.gsea-msigdb.org/gsea/msigdb/human/geneset/GOBP_ANATOMICAL_STRUCTURE_REGRESSION	AMH	AMHR2	BMPR1A	CD248	DRD2	FLT1	GLI1	LEF1	LRP5	OPN4	OPN5	SLC17A6	SLC6A3	SMAD5	SPI1	TH
GOBP_ANDROGEN_BIOSYNTHETIC_PROCESS	https://www.gsea-msigdb.org/gsea/msigdb/human/geneset/GOBP_ANDROGEN_BIOSYNTHETIC_PROCESS	CYP17A1	HSD17B3	HSD17B6	HSD3B1	HSD3B2	MED1	SRD5A1	SRD5A2	SRD5A3	WNT4
GOBP_ANDROGEN_CATABOLIC_PROCESS	https://www.gsea-msigdb.org/gsea/msigdb/human/geneset/GOBP_ANDROGEN_CATABOLIC_PROCESS	CYP19A1	HSD17B11	HSD17B6	SPP1	SRD5A1
GOBP_ANDROGEN_METABOLIC_PROCESS	https://www.gsea-msigdb.org/gsea/msigdb/human/geneset/GOBP_ANDROGEN_METABOLIC_PROCESS	ADM	AKR1C4	AKR1D1	CHST10	CYP17A1	CYP19A1	CYP3A4	DHRS9	ESR1	HSD17B10	HSD17B11	HSD17B2	HSD17B3	HSD17B4	HSD17B6	HSD17B7	HSD17B8	HSD3B1	HSD3B2	MED1	PLEKHA1	SGPL1	SHH	SPP1	SRD5A1	SRD5A2	SRD5A3	TIPARP	UGT2B7	WNT4
GOBP_ANDROGEN_RECEPTOR_SIGNALING_PATHWAY	https://www.gsea-msigdb.org/gsea/msigdb/human/geneset/GOBP_ANDROGEN_RECEPTOR_SIGNALING_PATHWAY	AR	ARID1A	CST11	DAB2	DAXX	DDX17	DDX5	DNAJA1	EP300	FKBP4	FOXH1	FOXP1	HDAC1	HDAC6	HEYL	KDM1A	KDM3A	KDM4C	KDM5D	MAPK1	NCOR1	NCOR2	NKX3-1	NODAL	PARK7	PHB1	PIAS2	PKN1	PLPP1	PMEPA1	PRMT2	RHOA	RHOXF1	RNF14	RNF6	RWDD1	SAFB2	SCGB2A1	SCGB2A2	SFRP1	SIRT1	SMARCA4	TCF21	TMF1	TRIM68	UBE3A	USP26	ZBTB7A
GOBP_ANGIOGENESIS_INVOLVED_IN_CORONARY_VASCULAR_MORPHOGENESIS	https://www.gsea-msigdb.org/gsea/msigdb/human/geneset/GOBP_ANGIOGENESIS_INVOLVED_IN_CORONARY_VASCULAR_MORPHOGENESIS	ACE	FGF2	NRP1	PDGFRB	TGFBR1
GOBP_ANGIOGENESIS_INVOLVED_IN_WOUND_HEALING	https://www.gsea-msigdb.org/gsea/msigdb/human/geneset/GOBP_ANGIOGENESIS_INVOLVED_IN_WOUND_HEALING	ADIPOR2	ALOX5	B4GALT1	CD34	CX3CL1	CXCR4	DAG1	FOXC2	GATA2	GPR4	GPX1	HPSE	ITGB3	KDR	MCAM	MIR1298	MIR200B	MIR34A	MIR451A	NDNF	NPR2	PIK3CB	PRCP	SERPINE1	SLC12A2	SMOC2	SRF	TAFA5	TNF	TNFAIP3	VEGFA	XBP1
GOBP_ANGIOTENSIN_ACTIVATED_SIGNALING_PATHWAY	https://www.gsea-msigdb.org/gsea/msigdb/human/geneset/GOBP_ANGIOTENSIN_ACTIVATED_SIGNALING_PATHWAY	ACTN2	AGT	AGTR1	AGTR2	AGTRAP	AHCYL1	CA2	CAMK2A	CAV1	MAS1	MAS1L	MIR143	MIR145	PPP3CA	PRKCA	RAP1GDS1	ROCK1	ROCK2	SRC
GOBP_ANIMAL_ORGAN_FORMATION	https://www.gsea-msigdb.org/gsea/msigdb/human/geneset/GOBP_ANIMAL_ORGAN_FORMATION	AR	AXIN2	BMP2	BMP4	BMP7	BMPR1A	CITED2	CTNNB1	DKK1	EMP2	EXT1	EYA1	FGF1	FGF10	FGF2	FGF8	FGFR2	FOLR1	FOXH1	FRS2	GATA5	GATA6	GDNF	GLI3	HAND2	HES1	HOXA11	HOXA3	HOXC11	ISL1	LEMD2	LRP2	MAP2K1	MAP2K2	MAPK1	MAPK3	MEF2C	MESP1	MIR20A	MKS1	NKX3-2	NOG	NOTCH1	NTF4	PAX2	PAX8	PIM1	RBM20
GOBP_ANIMAL_ORGAN_MATURATION	https://www.gsea-msigdb.org/gsea/msigdb/human/geneset/GOBP_ANIMAL_ORGAN_MATURATION	ACTN3	ADAMTS12	ADAMTS7	ALDH1A2	BMP2	CCDC154	DCHS1	EBP	EXT1	FGFR3	GATA3	GH1	GREM1	IFT80	IGF1	LEP	LTF	MBTPS2	PAX2	PHOSPHO1	PLXNB1	PTH	RET	RFLNA	RFLNB	RHOA	RYR1	SEMA4D	SNX10	THBS3	XYLT1	ZBTB16
GOBP_ANIMAL_ORGAN_MORPHOGENESIS	https://www.gsea-msigdb.org/gsea/msigdb/human/geneset/GOBP_ANIMAL_ORGAN_MORPHOGENESIS	ABCA12	ABCC9	ABI2	ABL1	ABLIM1	ACP4	ACP5	ACTA1	ACTA2	ACTC1	ACTG2	ACTN3	ACVR1	ACVR2A	ACVR2B	ACVRL1	ADAM15	ADAMTS1	ADAMTS16	ADAMTS5	ADARB1	ADGRG6	ADM	ADPRHL1	AGT	AGTPBP1	AGTR2	AHDC1	AHI1	AJAP1	AKT3	ALDH1A2	ALDH1A3	ALPK2	ALPL	ALX1	ALX3	ALX4	AMBN	AMELX	AMELY	AMTN	ANKH	ANKRD1	ANKRD11	ANKRD24	ANKRD6	ANXA6
GOBP_ANIMAL_ORGAN_REGENERATION	https://www.gsea-msigdb.org/gsea/msigdb/human/geneset/GOBP_ANIMAL_ORGAN_REGENERATION	ACE	ADM	ANGPT2	ANXA3	APOA2	ATIC	AURKA	AXL	BAAT	BAK1	CAD	CCNA2	CCND1	CDK1	CDKN1A	CEBPB	CLDN1	CPB2	CPT1A	CSNK2A2	CXCL12	EZH2	F7	FLT3	FPGS	GAS6	GATA1	GFER	GLI1	GUCD1	HFE	HSPG2	IGF2R	IHH	IL10	IL6	LCP1	LPIN1	MED1	NNMT	NOTCH1	NR0B2	NR4A3	PCNA	PDX1	PFKFB1	PNPT1	PRMT5
GOBP_ANOIKIS	https://www.gsea-msigdb.org/gsea/msigdb/human/geneset/GOBP_ANOIKIS	AKT1	ANKRD13C	BCL2	BMF	BRMS1	CAV1	CEACAM5	CEACAM6	CRYBA1	DAPK2	E2F1	IKBKG	ITGA5	ITGB1	MAP3K7	MCL1	MTOR	MYBBP1A	NOTCH1	NTRK2	PDK4	PIK3CA	PIK3R3	PTK2	PTRH2	SIK1	SNAI2	SRC	STK11	TFDP1	TLE1	TLE5	TSC2	ZNF304
GOBP_ANTERIOR_COMMISSURE_MORPHOGENESIS	https://www.gsea-msigdb.org/gsea/msigdb/human/geneset/GOBP_ANTERIOR_COMMISSURE_MORPHOGENESIS	DRAXIN	FBXO45	NFIB	NR2E1	PLXNA4	TSKU	WDR47
GOBP_ANTERIOR_HEAD_DEVELOPMENT	https://www.gsea-msigdb.org/gsea/msigdb/human/geneset/GOBP_ANTERIOR_HEAD_DEVELOPMENT	BMP5	COL2A1	DDX10	LHX1	PFAS	SOX9	SSBP3
GOBP_ANTERIOR_POSTERIOR_AXIS_SPECIFICATION	https://www.gsea-msigdb.org/gsea/msigdb/human/geneset/GOBP_ANTERIOR_POSTERIOR_AXIS_SPECIFICATION	AURKA	BASP1	BMP4	CDX1	CDX2	CDX4	CER1	CTNNB1	DCANP1	DDIT3	EPB41L5	ETS2	FOXA2	FRS2	FZD5	GDF3	GPC3	HEY2	HOXD8	LDB1	LEFTY1	LEFTY2	LHX1	MESP1	MESP2	NEUROG1	NODAL	NRARP	OTX2	PCSK6	PGAP1	PLD6	PRICKLE1	RIPPLY1	RIPPLY2	RNF2	SHH	SIX2	SKI	SMAD4	SRF	TASOR	TBX3	TBX6	TBXT	TDGF1	TDRD1	TDRD5
GOBP_ANTERIOR_POSTERIOR_AXON_GUIDANCE	https://www.gsea-msigdb.org/gsea/msigdb/human/geneset/GOBP_ANTERIOR_POSTERIOR_AXON_GUIDANCE	DCC	LHX1	LHX9	NTN1	UNC5A	UNC5B	UNC5C
GOBP_ANTERIOR_POSTERIOR_PATTERN_SPECIFICATION	https://www.gsea-msigdb.org/gsea/msigdb/human/geneset/GOBP_ANTERIOR_POSTERIOR_PATTERN_SPECIFICATION	ABI1	ACVR2A	ACVR2B	ALDH1A2	ALX4	ARC	ATM	ATP6AP2	AURKA	AXIN2	BARX1	BASP1	BHLHE40	BHLHE41	BMI1	BMP2	BMP4	BMPR1A	BMPR2	BPTF	BTG2	CDON	CDX1	CDX2	CDX4	CELSR2	CER1	CFC1	CFC1B	COBL	CRB2	CRKL	CTNNB1	CTNNBIP1	CYP26C1	DCANP1	DDIT3	DKK1	DLL1	DLL3	DMRT2	EMX2	EN1	EP300	EPB41L5	ETS2	FEZF1	FEZF2
GOBP_ANTEROGRADE_AXONAL_TRANSPORT	https://www.gsea-msigdb.org/gsea/msigdb/human/geneset/GOBP_ANTEROGRADE_AXONAL_TRANSPORT	AGBL4	AGTPBP1	AP3B1	AP3B2	AP3D1	AP3M1	AP3M2	AP3S1	AP3S2	ARL8A	ARL8B	BLOC1S1	BLOC1S2	BLOC1S3	BLOC1S4	BLOC1S5	BLOC1S6	BORCS5	CALY	DLG2	DTNBP1	FEZ1	HAP1	HSPB1	KIF1A	KIF1B	KIF1C	KIF3A	KIF3B	KIF4A	KIF5A	KIF5B	KIF5C	MAP1A	MAP2	MAPK8IP3	MECP2	MGARP	NEFL	NETO1	RAB21	RAB27B	SNAPIN	SOD1	SPAST	SPG7	SYBU	TERF2
GOBP_ANTEROGRADE_AXONAL_TRANSPORT_OF_MITOCHONDRION	https://www.gsea-msigdb.org/gsea/msigdb/human/geneset/GOBP_ANTEROGRADE_AXONAL_TRANSPORT_OF_MITOCHONDRION	AGBL4	AGTPBP1	FEZ1	HAP1	TRAK1	TRAK2
GOBP_ANTEROGRADE_DENDRITIC_TRANSPORT	https://www.gsea-msigdb.org/gsea/msigdb/human/geneset/GOBP_ANTEROGRADE_DENDRITIC_TRANSPORT	FLOT2	KIF17	KIF3B	KIF5A	KIF5B	KIF5C	STAU1	STAU2	TRAK2
GOBP_ANTEROGRADE_DENDRITIC_TRANSPORT_OF_NEUROTRANSMITTER_RECEPTOR_COMPLEX	https://www.gsea-msigdb.org/gsea/msigdb/human/geneset/GOBP_ANTEROGRADE_DENDRITIC_TRANSPORT_OF_NEUROTRANSMITTER_RECEPTOR_COMPLEX	KIF17	KIF3B	KIF5A	KIF5B	KIF5C
GOBP_ANTEROGRADE_NEURONAL_DENSE_CORE_VESICLE_TRANSPORT	https://www.gsea-msigdb.org/gsea/msigdb/human/geneset/GOBP_ANTEROGRADE_NEURONAL_DENSE_CORE_VESICLE_TRANSPORT	KIF1A	KIF1C	KIF5B	MAP2	MECP2	SYBU	TRIM46
GOBP_ANTIBACTERIAL_HUMORAL_RESPONSE	https://www.gsea-msigdb.org/gsea/msigdb/human/geneset/GOBP_ANTIBACTERIAL_HUMORAL_RESPONSE	ANG	BPIFA1	CAMP	CTSG	DEFA1	DEFA1B	DEFA3	DEFA4	DEFA5	DEFA6	DEFB1	DMBT1	ELANE	EVPL	FAU	FGA	FGB	H2BC10	H2BC11	H2BC12	H2BC12L	H2BC21	H2BC4	H2BC6	H2BC7	H2BC8	HLA-A	HLA-E	IGHA1	IGHA2	IGHE	IGHG1	IGHG2	IGHG3	IGHG4	IGHM	IGKV3-20	JCHAIN	KLK3	KLK5	KLK7	LGALS4	LTF	NCR3LG1	NOD2	PGC	PI3	PLA2G1B
GOBP_ANTIBACTERIAL_INNATE_IMMUNE_RESPONSE	https://www.gsea-msigdb.org/gsea/msigdb/human/geneset/GOBP_ANTIBACTERIAL_INNATE_IMMUNE_RESPONSE	DEFB136	MARCHF2	MIRLET7B	MPEG1	TFEB	UMOD
GOBP_ANTIBACTERIAL_PEPTIDE_PRODUCTION	https://www.gsea-msigdb.org/gsea/msigdb/human/geneset/GOBP_ANTIBACTERIAL_PEPTIDE_PRODUCTION	ELANE	EVPL	KLK3	KLK5	KLK7	LGALS4	NOD2	PGC	SPINK5
GOBP_ANTIBODY_DEPENDENT_CELLULAR_CYTOTOXICITY	https://www.gsea-msigdb.org/gsea/msigdb/human/geneset/GOBP_ANTIBODY_DEPENDENT_CELLULAR_CYTOTOXICITY	FCGR1A	FCGR2B	FCGR3A	HLA-E	IGHG1
GOBP_ANTIFUNGAL_HUMORAL_RESPONSE	https://www.gsea-msigdb.org/gsea/msigdb/human/geneset/GOBP_ANTIFUNGAL_HUMORAL_RESPONSE	DEFA4	FAM3A	IL36RN	LTF	RARRES2
GOBP_ANTIFUNGAL_INNATE_IMMUNE_RESPONSE	https://www.gsea-msigdb.org/gsea/msigdb/human/geneset/GOBP_ANTIFUNGAL_INNATE_IMMUNE_RESPONSE	BCL10	CARD9	CLEC4A	CLEC4C	CLEC4D	CLEC4E	CLEC6A	CLEC7A	CX3CR1	DEFB106A	DEFB106B	DEFB114	DEFB119	DEFB136	DEFB4A	FAM3A	PLA2G5	PLCG2	RARRES2	RNASE8	SPI1	TRIM62	USP15
GOBP_ANTIGEN_PROCESSING_AND_PRESENTATION	https://www.gsea-msigdb.org/gsea/msigdb/human/geneset/GOBP_ANTIGEN_PROCESSING_AND_PRESENTATION	ABCB9	ACE	AP3B1	AP3D1	ARL8B	ATG5	B2M	CALR	CCL19	CCL21	CCR7	CD1A	CD1B	CD1C	CD1D	CD1E	CD209	CD68	CD74	CD8A	CLEC4A	CLEC4M	CTSD	CTSE	CTSF	CTSH	CTSL	CTSS	CTSV	DNM2	ERAP1	ERAP2	EXT1	FCER1G	FCER2	FCGR1A	FCGR2B	FGL2	GBA1	HFE	HLA-A	HLA-B	HLA-C	HLA-DMA	HLA-DMB	HLA-DOA	HLA-DOB	HLA-DPA1
GOBP_ANTIGEN_PROCESSING_AND_PRESENTATION_ENDOGENOUS_LIPID_ANTIGEN_VIA_MHC_CLASS_IB	https://www.gsea-msigdb.org/gsea/msigdb/human/geneset/GOBP_ANTIGEN_PROCESSING_AND_PRESENTATION_ENDOGENOUS_LIPID_ANTIGEN_VIA_MHC_CLASS_IB	CD1A	CD1B	CD1C	CD1D	CD1E
GOBP_ANTIGEN_PROCESSING_AND_PRESENTATION_OF_ENDOGENOUS_ANTIGEN	https://www.gsea-msigdb.org/gsea/msigdb/human/geneset/GOBP_ANTIGEN_PROCESSING_AND_PRESENTATION_OF_ENDOGENOUS_ANTIGEN	ATG5	B2M	CD1A	CD1B	CD1C	CD1D	CD1E	CD74	ERAP1	ERAP2	HFE	HLA-A	HLA-B	HLA-C	HLA-DRA	HLA-DRB1	HLA-E	HLA-F	HLA-G	HLA-H	IDE	MICA	MICB	RAET1E	RAET1G	RAET1L	TAP1	TAP2	TAPBP	ULBP1	ULBP2	ULBP3
GOBP_ANTIGEN_PROCESSING_AND_PRESENTATION_OF_ENDOGENOUS_PEPTIDE_ANTIGEN	https://www.gsea-msigdb.org/gsea/msigdb/human/geneset/GOBP_ANTIGEN_PROCESSING_AND_PRESENTATION_OF_ENDOGENOUS_PEPTIDE_ANTIGEN	B2M	ERAP1	ERAP2	HFE	HLA-A	HLA-B	HLA-C	HLA-DRA	HLA-DRB1	HLA-E	HLA-F	HLA-G	HLA-H	IDE	MICA	MICB	RAET1E	RAET1G	RAET1L	TAP1	TAP2	TAPBP	ULBP1	ULBP2	ULBP3
GOBP_ANTIGEN_PROCESSING_AND_PRESENTATION_OF_EXOGENOUS_ANTIGEN	https://www.gsea-msigdb.org/gsea/msigdb/human/geneset/GOBP_ANTIGEN_PROCESSING_AND_PRESENTATION_OF_EXOGENOUS_ANTIGEN	AP3B1	AP3D1	B2M	CD1A	CD1B	CD1C	CD1D	CD1E	CD74	CLEC4A	CTSD	CTSE	CTSF	CTSL	CTSS	CTSV	DNM2	FCER1G	FCGR1A	FCGR2B	HLA-A	HLA-DMA	HLA-DMB	HLA-DOA	HLA-DOB	HLA-DPA1	HLA-DPB1	HLA-DQA1	HLA-DQA2	HLA-DQB1	HLA-DQB2	HLA-DRA	HLA-DRB1	HLA-DRB3	HLA-DRB4	HLA-DRB5	HLA-E	HLA-F	IFI30	IKBKB	LGMN	LNPEP	MFSD6	MR1	PIKFYVE	PSME1	TAP2	TRAF6
GOBP_ANTIGEN_PROCESSING_AND_PRESENTATION_OF_EXOGENOUS_PEPTIDE_ANTIGEN	https://www.gsea-msigdb.org/gsea/msigdb/human/geneset/GOBP_ANTIGEN_PROCESSING_AND_PRESENTATION_OF_EXOGENOUS_PEPTIDE_ANTIGEN	B2M	CD74	CLEC4A	CTSD	CTSE	CTSF	CTSL	CTSS	CTSV	DNM2	FCER1G	FCGR1A	FCGR2B	HLA-A	HLA-DMA	HLA-DMB	HLA-DOA	HLA-DOB	HLA-DPA1	HLA-DPB1	HLA-DQA1	HLA-DQA2	HLA-DQB1	HLA-DQB2	HLA-DRA	HLA-DRB1	HLA-DRB3	HLA-DRB4	HLA-DRB5	HLA-E	HLA-F	IFI30	IKBKB	LGMN	LNPEP	MFSD6	PIKFYVE	TAP2	TRAF6	UNC93B1
GOBP_ANTIGEN_PROCESSING_AND_PRESENTATION_OF_EXOGENOUS_PEPTIDE_ANTIGEN_VIA_MHC_CLASS_I	https://www.gsea-msigdb.org/gsea/msigdb/human/geneset/GOBP_ANTIGEN_PROCESSING_AND_PRESENTATION_OF_EXOGENOUS_PEPTIDE_ANTIGEN_VIA_MHC_CLASS_I	CLEC4A	FCER1G	FCGR1A	HLA-A	IFI30	IKBKB	LNPEP	MFSD6
GOBP_ANTIGEN_PROCESSING_AND_PRESENTATION_OF_EXOGENOUS_PEPTIDE_ANTIGEN_VIA_MHC_CLASS_II	https://www.gsea-msigdb.org/gsea/msigdb/human/geneset/GOBP_ANTIGEN_PROCESSING_AND_PRESENTATION_OF_EXOGENOUS_PEPTIDE_ANTIGEN_VIA_MHC_CLASS_II	B2M	CD74	CTSD	CTSE	CTSF	CTSL	CTSS	CTSV	DNM2	FCER1G	FCGR2B	HLA-DMA	HLA-DMB	HLA-DOA	HLA-DOB	HLA-DPA1	HLA-DPB1	HLA-DQA1	HLA-DQA2	HLA-DQB1	HLA-DQB2	HLA-DRA	HLA-DRB1	HLA-DRB3	HLA-DRB4	HLA-DRB5	IFI30	LGMN	PIKFYVE	TRAF6	UNC93B1
GOBP_ANTIGEN_PROCESSING_AND_PRESENTATION_OF_LIPID_ANTIGEN_VIA_MHC_CLASS_IB	https://www.gsea-msigdb.org/gsea/msigdb/human/geneset/GOBP_ANTIGEN_PROCESSING_AND_PRESENTATION_OF_LIPID_ANTIGEN_VIA_MHC_CLASS_IB	AP3B1	AP3D1	CD1A	CD1B	CD1C	CD1D	CD1E
GOBP_ANTIGEN_PROCESSING_AND_PRESENTATION_OF_PEPTIDE_ANTIGEN	https://www.gsea-msigdb.org/gsea/msigdb/human/geneset/GOBP_ANTIGEN_PROCESSING_AND_PRESENTATION_OF_PEPTIDE_ANTIGEN	ABCB9	ACE	B2M	CALR	CD209	CD74	CLEC4A	CLEC4M	CTSD	CTSE	CTSF	CTSL	CTSS	CTSV	DNM2	ERAP1	ERAP2	FCER1G	FCGR1A	FCGR2B	HFE	HLA-A	HLA-B	HLA-C	HLA-DMA	HLA-DMB	HLA-DOA	HLA-DOB	HLA-DPA1	HLA-DPB1	HLA-DQA1	HLA-DQA2	HLA-DQB1	HLA-DQB2	HLA-DRA	HLA-DRB1	HLA-DRB3	HLA-DRB4	HLA-DRB5	HLA-E	HLA-F	HLA-G	HLA-H	IDE	IFI30	IKBKB	LGMN	LNPEP
GOBP_ANTIGEN_PROCESSING_AND_PRESENTATION_OF_PEPTIDE_ANTIGEN_VIA_MHC_CLASS_I	https://www.gsea-msigdb.org/gsea/msigdb/human/geneset/GOBP_ANTIGEN_PROCESSING_AND_PRESENTATION_OF_PEPTIDE_ANTIGEN_VIA_MHC_CLASS_I	ABCB9	ACE	B2M	CALR	CLEC4A	ERAP1	ERAP2	FCER1G	FCGR1A	HFE	HLA-A	HLA-B	HLA-C	HLA-E	HLA-F	HLA-G	HLA-H	IDE	IFI30	IKBKB	LNPEP	MFSD6	MICA	MICB	MR1	PDIA3	RAET1E	RAET1G	RAET1L	SAR1B	TAP1	TAP2	TAPBP	TAPBPL	ULBP1	ULBP2	ULBP3
GOBP_ANTIGEN_PROCESSING_AND_PRESENTATION_OF_PEPTIDE_ANTIGEN_VIA_MHC_CLASS_IB	https://www.gsea-msigdb.org/gsea/msigdb/human/geneset/GOBP_ANTIGEN_PROCESSING_AND_PRESENTATION_OF_PEPTIDE_ANTIGEN_VIA_MHC_CLASS_IB	B2M	HFE	HLA-A	HLA-B	HLA-C	HLA-E	HLA-F	HLA-G	HLA-H	MICA	MICB	RAET1E	RAET1G	RAET1L	TAP2	ULBP1	ULBP2	ULBP3
GOBP_ANTIGEN_PROCESSING_AND_PRESENTATION_OF_PEPTIDE_OR_POLYSACCHARIDE_ANTIGEN_VIA_MHC_CLASS_II	https://www.gsea-msigdb.org/gsea/msigdb/human/geneset/GOBP_ANTIGEN_PROCESSING_AND_PRESENTATION_OF_PEPTIDE_OR_POLYSACCHARIDE_ANTIGEN_VIA_MHC_CLASS_II	ARL8B	B2M	CD74	CTSD	CTSE	CTSF	CTSL	CTSS	CTSV	DNM2	FCER1G	FCGR2B	HLA-DMA	HLA-DMB	HLA-DOA	HLA-DOB	HLA-DPA1	HLA-DPB1	HLA-DQA1	HLA-DQA2	HLA-DQB1	HLA-DQB2	HLA-DRA	HLA-DRB1	HLA-DRB3	HLA-DRB4	HLA-DRB5	IFI30	LGMN	MARCHF1	MARCHF8	PIKFYVE	PYCARD	THBS1	TRAF6	TREM2	UNC93B1
GOBP_ANTIGEN_PROCESSING_AND_PRESENTATION_VIA_MHC_CLASS_IB	https://www.gsea-msigdb.org/gsea/msigdb/human/geneset/GOBP_ANTIGEN_PROCESSING_AND_PRESENTATION_VIA_MHC_CLASS_IB	AP3B1	AP3D1	B2M	CD1A	CD1B	CD1C	CD1D	CD1E	HFE	HLA-A	HLA-B	HLA-C	HLA-E	HLA-F	HLA-G	HLA-H	MICA	MICB	RAET1E	RAET1G	RAET1L	TAP2	ULBP1	ULBP2	ULBP3
GOBP_ANTIGEN_RECEPTOR_MEDIATED_SIGNALING_PATHWAY	https://www.gsea-msigdb.org/gsea/msigdb/human/geneset/GOBP_ANTIGEN_RECEPTOR_MEDIATED_SIGNALING_PATHWAY	ABL1	ADA	BANK1	BAX	BCAR1	BCL10	BCL2	BLK	BLNK	BMX	BRAF	BTK	BTN1A1	BTN2A1	BTN2A2	BTN2A3P	BTN3A1	BTN3A2	BTN3A3	BTNL10P	BTNL2	BTNL3	BTNL8	BTNL9	CACNB3	CACNB4	CARD11	CBLB	CCR7	CD160	CD19	CD22	CD226	CD247	CD276	CD28	CD300A	CD38	CD3D	CD3E	CD3G	CD79A	CD79B	CD81	CD8A	CD8B	CEACAM1	CMTM3
GOBP_ANTIMICROBIAL_HUMORAL_IMMUNE_RESPONSE_MEDIATED_BY_ANTIMICROBIAL_PEPTIDE	https://www.gsea-msigdb.org/gsea/msigdb/human/geneset/GOBP_ANTIMICROBIAL_HUMORAL_IMMUNE_RESPONSE_MEDIATED_BY_ANTIMICROBIAL_PEPTIDE	ANG	BPIFA1	CAMP	CCL13	CXCL1	CXCL10	CXCL11	CXCL13	CXCL14	CXCL2	CXCL3	CXCL5	CXCL6	CXCL8	CXCL9	DEFA1	DEFA1B	DEFA3	DEFA4	DEFA5	DEFA6	DEFB1	DEFB118	DEFB126	DEFB127	DEFB4A	ELANE	EVPL	F2	FAM3A	FAU	GALP	GAPDH	GNLY	H2BC10	H2BC11	H2BC12	H2BC12L	H2BC21	H2BC4	H2BC6	H2BC7	H2BC8	HMGN2	HRG	IL17A	IL17F	KLK3
GOBP_ANTIMICROBIAL_HUMORAL_RESPONSE	https://www.gsea-msigdb.org/gsea/msigdb/human/geneset/GOBP_ANTIMICROBIAL_HUMORAL_RESPONSE	ACOD1	ANG	AZU1	BCL3	BPIFA1	CAMP	CCL13	COLEC11	CST9	CST9L	CST9LP1	CTSG	CXCL1	CXCL10	CXCL11	CXCL13	CXCL14	CXCL2	CXCL3	CXCL5	CXCL6	CXCL8	CXCL9	DEFA1	DEFA1B	DEFA3	DEFA4	DEFA5	DEFA6	DEFB1	DEFB118	DEFB126	DEFB127	DEFB4A	DMBT1	ELANE	EVPL	F2	FAM3A	FAU	FGA	FGB	GALP	GAPDH	GATA6	GNLY	H2BC10	H2BC11
GOBP_ANTIMICROBIAL_PEPTIDE_PRODUCTION	https://www.gsea-msigdb.org/gsea/msigdb/human/geneset/GOBP_ANTIMICROBIAL_PEPTIDE_PRODUCTION	ELANE	EVPL	IL17A	IL17F	KLK3	KLK5	KLK7	LGALS4	NOD2	PGC	SPINK5
GOBP_ANTIVIRAL_INNATE_IMMUNE_RESPONSE	https://www.gsea-msigdb.org/gsea/msigdb/human/geneset/GOBP_ANTIVIRAL_INNATE_IMMUNE_RESPONSE	AKAP1	ATAD3A	CARD8	CLPB	CXCL10	DHX15	DHX16	DHX58	DUS2	EIF2AK2	IFIH1	IFIT1	IFIT2	IFIT3	MARCHF2	MAVS	MBL2	MORC3	MX1	NCK1	NLRP1	NLRP6	NMB	NMBR	OAS1	PDE12	PHB1	PHB2	RIGI	RNF135	SENP7	STING1	TBK1	TNF	TRAF6	TRIM25	TRIM31	TRIM6	TRIM65	TRIM7	UBE2N	UBE2W	USP18	USP20	USP44	ZBP1	ZDHHC1	ZDHHC11
GOBP_ANTRAL_OVARIAN_FOLLICLE_GROWTH	https://www.gsea-msigdb.org/gsea/msigdb/human/geneset/GOBP_ANTRAL_OVARIAN_FOLLICLE_GROWTH	BMPR1B	EREG	ESR1	GAS2	GPR149	NPPC	NPR2	PTX3	SCAPER	TNFAIP6	ZP3
GOBP_AORTA_DEVELOPMENT	https://www.gsea-msigdb.org/gsea/msigdb/human/geneset/GOBP_AORTA_DEVELOPMENT	ACVRL1	ADAMTS6	ADAMTS9	AP2B1	APLNR	BMPR1A	CHD7	CNTRL	COL3A1	DCTN5	DLL4	EDNRA	EFEMP2	EFNB2	EGR2	ENG	EYA1	FGF8	FKBP10	FOXH1	GAA	HECTD1	HES1	HEY1	HEY2	JAG1	LEP	LOX	LOXL1	LRP1	LRP2	MIR143	MIR145	MIR205	MIR29B1	MYLK	NAGLU	NDST1	NGFR	NKX3-1	NOTCH1	NPRL3	PDE2A	PDGFRB	PKD2	PLXND1	PRDM1	PRICKLE1
GOBP_AORTA_MORPHOGENESIS	https://www.gsea-msigdb.org/gsea/msigdb/human/geneset/GOBP_AORTA_MORPHOGENESIS	ACVRL1	ADAMTS9	BMPR1A	CHD7	COL3A1	DLL4	EFEMP2	EFNB2	ENG	EYA1	FGF8	FKBP10	FOXH1	HES1	HEY1	HEY2	JAG1	LRP1	MIR143	MIR145	MIR205	MIR29B1	MYLK	NAGLU	NOTCH1	NPRL3	PDGFRB	PROX1	RBPJ	SEC24B	SIX1	SOX4	SRF	TBX1	TBX2	TFAP2B	TGFB2	TGFBR2
GOBP_AORTA_SMOOTH_MUSCLE_TISSUE_MORPHOGENESIS	https://www.gsea-msigdb.org/gsea/msigdb/human/geneset/GOBP_AORTA_SMOOTH_MUSCLE_TISSUE_MORPHOGENESIS	COL3A1	EFEMP2	MIR143	MIR145	MYLK	PROX1
GOBP_AORTIC_VALVE_MORPHOGENESIS	https://www.gsea-msigdb.org/gsea/msigdb/human/geneset/GOBP_AORTIC_VALVE_MORPHOGENESIS	ADAMTS5	AXIN2	BMP4	CDH11	DLL4	EFNA1	ELN	EMILIN1	GATA3	GATA4	GATA5	HEY1	HEY2	HEYL	JAG1	NFATC1	NKX2-5	NOS3	NOTCH1	NPPA	RB1	RHOA	ROBO1	ROBO2	ROCK1	ROCK2	SLIT2	SLIT3	SMAD2	SMAD6	SNAI1	SNAI2	SOX9	TBX20	TGFB1	TGFBR2	TIE1	TWIST1
GOBP_APICAL_JUNCTION_ASSEMBLY	https://www.gsea-msigdb.org/gsea/msigdb/human/geneset/GOBP_APICAL_JUNCTION_ASSEMBLY	AFDN	APC	ARL2	CDH5	CLDN1	CLDN10	CLDN11	CLDN14	CLDN15	CLDN16	CLDN17	CLDN18	CLDN19	CLDN2	CLDN20	CLDN22	CLDN23	CLDN24	CLDN25	CLDN3	CLDN34	CLDN4	CLDN5	CLDN6	CLDN7	CLDN8	CLDN9	CTNNA1	DLG1	DLG5	ECT2	EPHA2	ESAM	F11R	FBF1	FRMPD2	FZD5	GPBAR1	GRHL2	IKBKB	IL17A	MARVELD2	MARVELD3	MICALL2	MIR105-1	MIR142	MPP7	MYO1C
GOBP_APICAL_PROTEIN_LOCALIZATION	https://www.gsea-msigdb.org/gsea/msigdb/human/geneset/GOBP_APICAL_PROTEIN_LOCALIZATION	ACTB	ARF4	ATP8B1	CELSR1	DLG5	GOPC	HCN1	INSC	JAM3	MAL	NAPA	RDX	SHROOM2	SHROOM3	VANGL2
GOBP_APOLIPOPROTEIN_A_I_MEDIATED_SIGNALING_PATHWAY	https://www.gsea-msigdb.org/gsea/msigdb/human/geneset/GOBP_APOLIPOPROTEIN_A_I_MEDIATED_SIGNALING_PATHWAY	ABCA1	ABCA7	ITGAV	ITGB3	MIR19B1	MIR33A	RHOA
GOBP_APOPTOTIC_CELL_CLEARANCE	https://www.gsea-msigdb.org/gsea/msigdb/human/geneset/GOBP_APOPTOTIC_CELL_CLEARANCE	ABCA7	ADGRB1	ALOX15	ANXA1	AXL	BECN1	C2	C3	C4A	C4B	CCL2	CCR2	CD300LF	CD36	FCN1	FCN2	FCN3	GAS6	HMGB1	ITGAV	ITGB3	JMJD6	LRP1	MARCO	MEGF10	MERTK	MFGE8	NR1H3	PEAR1	RAB14	RAC1	RAC3	RARA	SCARB1	SPG11	TGM2	THBS1	TIMD4	TREM2	TREX1	TYRO3	TYROBP	XKR4	XKR5	XKR6	XKR7	XKR8	XKR9
GOBP_APOPTOTIC_CHROMOSOME_CONDENSATION	https://www.gsea-msigdb.org/gsea/msigdb/human/geneset/GOBP_APOPTOTIC_CHROMOSOME_CONDENSATION	ACIN1	DFFB	ERN2	GPER1	KDM4A	TOP2A
GOBP_APOPTOTIC_DNA_FRAGMENTATION	https://www.gsea-msigdb.org/gsea/msigdb/human/geneset/GOBP_APOPTOTIC_DNA_FRAGMENTATION	AIFM1	APAF1	BAX	CECR2	CIDEA	DFFA	DFFB	DICER1	DNASE1L3	DNASE2	DNASE2B	ENDOG	EXOG	FOXL2	HSF1	IL6	MIR146A	NMNAT1	ST20	VPS54
GOBP_APOPTOTIC_MITOCHONDRIAL_CHANGES	https://www.gsea-msigdb.org/gsea/msigdb/human/geneset/GOBP_APOPTOTIC_MITOCHONDRIAL_CHANGES	ACAA2	AIFM2	AKT1	ATF2	ATG3	ATP2A1	ATP5IF1	AVP	BAD	BAK1	BAX	BBC3	BCL2	BCL2A1	BCL2L1	BCL2L11	BCL2L2	BID	BIK	BLOC1S2	BMF	BNIP3	BNIP3L	BOK	CAMK2A	CCAR2	CHCHD10	CIDEB	CLU	DNM1L	ERBB4	EYA2	FAM162A	FIS1	FXN	FZD9	GCLC	GCLM	GGCT	GHITM	GPER1	GPX1	GSK3A	GSK3B	GZMB	HGF	HIP1R	HK2
GOBP_APOPTOTIC_PROCESS	https://www.gsea-msigdb.org/gsea/msigdb/human/geneset/GOBP_APOPTOTIC_PROCESS	AARS1	AATF	ABL1	ABL2	ACAA2	ACE	ACER2	ACIN1	ACKR3	ACTB	ACTC1	ACTL6A	ACTN1	ACTN2	ACTN3	ACTN4	ACVR1	ACVR1B	ACVR1C	ADA	ADAM15	ADAM17	ADAM8	ADAMTS20	ADAMTSL4	ADAR	ADARB1	ADCY10	ADIPOQ	ADM	ADNP	ADORA1	ADORA2A	ADRA1A	AEN	AGAP2	AGO4	AGT	AGTR2	AHCYL1	AHI1	AHR	AIFM1	AIFM2	AIFM3	AIMP1	AIMP2	AIPL1
GOBP_APOPTOTIC_PROCESS_INVOLVED_IN_BLOOD_VESSEL_MORPHOGENESIS	https://www.gsea-msigdb.org/gsea/msigdb/human/geneset/GOBP_APOPTOTIC_PROCESS_INVOLVED_IN_BLOOD_VESSEL_MORPHOGENESIS	BAK1	BAX	LEF1	LRP5	SPI1
GOBP_APOPTOTIC_PROCESS_INVOLVED_IN_DEVELOPMENT	https://www.gsea-msigdb.org/gsea/msigdb/human/geneset/GOBP_APOPTOTIC_PROCESS_INVOLVED_IN_DEVELOPMENT	ATF2	BAK1	BAX	BCL2L11	BMP4	BMP7	CCN1	CHEK1	CRYAB	FGF4	FOXC1	FOXC2	FZD5	HAND2	HNF1B	JAG2	LEF1	LRP5	MEGF10	MIR19B1	NKX2-5	NOTCH1	PAX2	PAX8	PPP2R1B	ROBO2	SCRIB	SIX3	SLIT2	SLIT3	SPI1	TGFB2	TNFRSF1A	TNFRSF1B	VDR	XKR4	XKR5	XKR6	XKR7	XKR8	XKR9	ZPR1
GOBP_APOPTOTIC_PROCESS_INVOLVED_IN_HEART_MORPHOGENESIS	https://www.gsea-msigdb.org/gsea/msigdb/human/geneset/GOBP_APOPTOTIC_PROCESS_INVOLVED_IN_HEART_MORPHOGENESIS	BMP4	CCN1	FOXC1	FOXC2	HAND2	NKX2-5	TGFB2
GOBP_APOPTOTIC_PROCESS_INVOLVED_IN_MORPHOGENESIS	https://www.gsea-msigdb.org/gsea/msigdb/human/geneset/GOBP_APOPTOTIC_PROCESS_INVOLVED_IN_MORPHOGENESIS	BAK1	BAX	BCL2L11	BMP4	BMP7	CCN1	CRYAB	FGF4	FOXC1	FOXC2	FZD5	HAND2	HNF1B	JAG2	LEF1	LRP5	NKX2-5	NOTCH1	PAX2	PAX8	PPP2R1B	SCRIB	SPI1	TGFB2	TNFRSF1A	TNFRSF1B	VDR
GOBP_APOPTOTIC_PROCESS_IN_BONE_MARROW_CELL	https://www.gsea-msigdb.org/gsea/msigdb/human/geneset/GOBP_APOPTOTIC_PROCESS_IN_BONE_MARROW_CELL	BCL2L1	FGFR2	LEF1	MIR146A	PLK2	PTH
GOBP_APOPTOTIC_SIGNALING_PATHWAY	https://www.gsea-msigdb.org/gsea/msigdb/human/geneset/GOBP_APOPTOTIC_SIGNALING_PATHWAY	AATF	ABL1	ACAA2	ACKR3	ACVR1	ACVR1B	ADCY10	ADORA1	ADORA2A	AEN	AGT	AGTR2	AIFM1	AKT1	ANXA6	APAF1	AR	ARHGEF2	ARL6IP5	ARMC10	ASAH2	ATAD5	ATF2	ATF3	ATF4	ATM	ATP2A1	ATP2A3	ATP5IF1	AVP	BAD	BAG3	BAG5	BAG6	BAK1	BAX	BBC3	BCAP31	BCL10	BCL2	BCL2A1	BCL2L1	BCL2L10	BCL2L11	BCL2L12	BCL2L14	BCL2L2	BCL3
GOBP_APPENDAGE_DEVELOPMENT	https://www.gsea-msigdb.org/gsea/msigdb/human/geneset/GOBP_APPENDAGE_DEVELOPMENT	ACD	AFF3	ALDH1A2	ALX3	ALX4	ASPH	ATRX	B4GALNT1	B9D1	BAK1	BAX	BBS7	BCL2L11	BMP4	BMP7	BMPR1A	BMPR2	BPNT2	C2CD3	CACNA1C	CHD7	CHST11	CIBAR1	COL2A1	COL3A1	COMP	CPLANE2	CRABP2	CREBBP	CTNNB1	CYP26B1	DKK1	DLX5	DLX6	DYNC2H1	ECE1	EN1	EVX2	EXT1	FBN2	FBXW4	FERMT2	FGF10	FGF4	FGF8	FGF9	FGFR2	FLVCR1
GOBP_APPENDAGE_MORPHOGENESIS	https://www.gsea-msigdb.org/gsea/msigdb/human/geneset/GOBP_APPENDAGE_MORPHOGENESIS	ACD	AFF3	ALDH1A2	ALX3	ALX4	ASPH	ATRX	B9D1	BAK1	BAX	BCL2L11	BMP4	BMP7	BMPR1A	BPNT2	C2CD3	CACNA1C	CHD7	CHST11	CIBAR1	COL2A1	COL3A1	CRABP2	CREBBP	CTNNB1	CYP26B1	DKK1	DLX5	DLX6	DYNC2H1	ECE1	EN1	EVX2	EXT1	FBN2	FBXW4	FGF10	FGF4	FGF8	FGF9	FGFR2	FLVCR1	FMN1	FRAS1	FREM2	FZD6	GDF5	GLI3
GOBP_ARACHIDONIC_ACID_METABOLIC_PROCESS	https://www.gsea-msigdb.org/gsea/msigdb/human/geneset/GOBP_ARACHIDONIC_ACID_METABOLIC_PROCESS	ABHD12	ABHD6	AKR1C3	ALOX12	ALOX12B	ALOX15	ALOX15B	ALOX5	ALOXE3	AWAT1	CBR1	CYP1A1	CYP1A2	CYP1B1	CYP2A13	CYP2A6	CYP2A7	CYP2B6	CYP2C18	CYP2C19	CYP2C8	CYP2C9	CYP2D6	CYP2D7	CYP2E1	CYP2F1	CYP2J2	CYP2S1	CYP2U1	CYP4A11	CYP4A22	CYP4F11	CYP4F12	CYP4F2	CYP4F3	CYP4Z1	DAGLA	DAGLB	EPHX1	FAAH	FAAH2	GPX1	GPX4	MGLL	MGST3	PLA2G10	PLA2G2F	PLA2G4A
GOBP_ARACHIDONIC_ACID_SECRETION	https://www.gsea-msigdb.org/gsea/msigdb/human/geneset/GOBP_ARACHIDONIC_ACID_SECRETION	ACE	ANXA1	AVPR1B	BDKRB2	DRD2	DRD3	DRD4	LHCGR	MIF	NMB	NMUR2	NTSR1	OC90	PLA2G10	PLA2G12A	PLA2G12B	PLA2G1B	PLA2G2A	PLA2G2C	PLA2G2D	PLA2G2E	PLA2G2F	PLA2G3	PLA2G4A	PLA2G4F	PLA2G5	PLA2R1	PNPLA8	PROCA1	SSTR4	SYK
GOBP_ARF_PROTEIN_SIGNAL_TRANSDUCTION	https://www.gsea-msigdb.org/gsea/msigdb/human/geneset/GOBP_ARF_PROTEIN_SIGNAL_TRANSDUCTION	ARFGAP1	ARFGEF1	ARFGEF2	ARFGEF3	CYTH1	CYTH2	CYTH3	CYTH4	FBXO8	GBF1	GIT1	GIT2	IQSEC1	IQSEC2	IQSEC3	MAP4K4	MAPRE2	MYO9B	PSD	PSD2	PSD3	PSD4
GOBP_ARGININE_BIOSYNTHETIC_PROCESS	https://www.gsea-msigdb.org/gsea/msigdb/human/geneset/GOBP_ARGININE_BIOSYNTHETIC_PROCESS	ASL	ASS1	CLN3	NAGS	OTC
GOBP_ARGININE_CATABOLIC_PROCESS	https://www.gsea-msigdb.org/gsea/msigdb/human/geneset/GOBP_ARGININE_CATABOLIC_PROCESS	ARG1	ARG2	ATP2B4	DDAH1	DDAH2	FAH	MIR21	NOS1	NOS2	NOS3	OAT
GOBP_ARGININE_METABOLIC_PROCESS	https://www.gsea-msigdb.org/gsea/msigdb/human/geneset/GOBP_ARGININE_METABOLIC_PROCESS	AGMAT	ARG1	ARG2	ART4	ASL	ASS1	ATP2B4	CLN3	DDAH1	DDAH2	FAH	MIR21	NAGS	NOS1	NOS2	NOS3	OAT	OTC	SLC39A8	SLC7A7
GOBP_AROMATIC_AMINO_ACID_FAMILY_CATABOLIC_PROCESS	https://www.gsea-msigdb.org/gsea/msigdb/human/geneset/GOBP_AROMATIC_AMINO_ACID_FAMILY_CATABOLIC_PROCESS	ACMSD	AFMID	FAH	GSTZ1	HAAO	HGD	HPD	IDO1	IDO2	IL4I1	KMO	KYNU	PAH	QDPR	TAT	TDO2
GOBP_AROMATIC_AMINO_ACID_METABOLIC_PROCESS	https://www.gsea-msigdb.org/gsea/msigdb/human/geneset/GOBP_AROMATIC_AMINO_ACID_METABOLIC_PROCESS	ACMSD	AFMID	ATP7A	DCT	FAH	GCDH	GSTZ1	HAAO	HGD	HPD	HPDL	IDO1	IDO2	IL4I1	IYD	KMO	KYNU	OCA2	PAH	PARK7	PCBD1	PCBD2	QDPR	SLC45A2	TAT	TDO2	TH	THAP4	TPH1	TPH2	TTC36	TYR
GOBP_AROMATIC_AMINO_ACID_TRANSPORT	https://www.gsea-msigdb.org/gsea/msigdb/human/geneset/GOBP_AROMATIC_AMINO_ACID_TRANSPORT	ACE2	SLC15A4	SLC16A10	SLC25A29	SLC36A4	SLC38A3	SLC38A5	SLC3A2	SLC6A14	SLC7A1	SLC7A5	SLC7A8
GOBP_ARP2_3_COMPLEX_MEDIATED_ACTIN_NUCLEATION	https://www.gsea-msigdb.org/gsea/msigdb/human/geneset/GOBP_ARP2_3_COMPLEX_MEDIATED_ACTIN_NUCLEATION	ABI2	ACTR2	ACTR3	AP1AR	ARF1	ARFIP1	ARFIP2	ARPC1A	ARPC1B	ARPC2	ARPC3	ARPC4	ARPC5	ARPC5L	BRK1	CARMIL1	CARMIL2	CARMIL3	CORO1B	CTNNA2	CYFIP1	DNAI3	FCHSD2	GMFB	GMFG	HIP1R	IQGAP2	JMY	MAGEL2	NCKAP1	PICK1	RNH1	TRIM27	WASF1	WASF2	WASF3	WASH3P	WASH6P	WASHC1	WASHC2A	WASHC2C	WASHC3	WASHC4	WASHC5	WHAMM	WIPF3
GOBP_ARTERIAL_ENDOTHELIAL_CELL_DIFFERENTIATION	https://www.gsea-msigdb.org/gsea/msigdb/human/geneset/GOBP_ARTERIAL_ENDOTHELIAL_CELL_DIFFERENTIATION	DLL1	HEY1	HEY2	NOTCH1	RBPJ	TMEM100
GOBP_ARTERY_DEVELOPMENT	https://www.gsea-msigdb.org/gsea/msigdb/human/geneset/GOBP_ARTERY_DEVELOPMENT	ACVR2B	ACVRL1	ADAMTS6	ADAMTS9	ADGRF5	AKT3	ANGPTL3	AP2B1	APLNR	APOB	APOE	ARID2	BMP4	BMPR1A	BMPR2	CHD7	CITED2	CNTRL	COL3A1	COMP	DCTN5	DDIT3	DLL4	EDN1	EDNRA	EFEMP2	EFNB2	EGR2	ENG	EYA1	FGF8	FKBP10	FOLR1	FOXC1	FOXC2	FOXF1	FOXH1	GAA	GJA5	GLI3	HAND2	HECTD1	HES1	HEY1	HEY2	HOXA1	HOXA13	HPGD
GOBP_ARTERY_MORPHOGENESIS	https://www.gsea-msigdb.org/gsea/msigdb/human/geneset/GOBP_ARTERY_MORPHOGENESIS	ACVRL1	ADAMTS9	ADGRF5	AKT3	ANGPTL3	APOB	APOE	ARID2	BMP4	BMPR1A	BMPR2	CHD7	CITED2	COL3A1	COMP	DLL4	EDN1	EDNRA	EFEMP2	EFNB2	ENG	EYA1	FGF8	FKBP10	FOLR1	FOXC1	FOXC2	FOXF1	FOXH1	GJA5	HAND2	HES1	HEY1	HEY2	HOXA1	HOXA13	HPGD	JAG1	LDLR	LRP1	LRP2	MDK	MIR143	MIR145	MIR153-1	MIR205	MIR29B1	MIR329-1
GOBP_ARTICULAR_CARTILAGE_DEVELOPMENT	https://www.gsea-msigdb.org/gsea/msigdb/human/geneset/GOBP_ARTICULAR_CARTILAGE_DEVELOPMENT	BGN	EPYC	IFT80	OGN	OPTC	PBXIP1
GOBP_ASCENDING_AORTA_DEVELOPMENT	https://www.gsea-msigdb.org/gsea/msigdb/human/geneset/GOBP_ASCENDING_AORTA_DEVELOPMENT	HES1	HEY2	LOX	SOX4	TGFB2
GOBP_ASPARAGINE_METABOLIC_PROCESS	https://www.gsea-msigdb.org/gsea/msigdb/human/geneset/GOBP_ASPARAGINE_METABOLIC_PROCESS	ASNS	ASNSD1	ASRGL1	ATF4	NIT2
GOBP_ASPARTATE_FAMILY_AMINO_ACID_BIOSYNTHETIC_PROCESS	https://www.gsea-msigdb.org/gsea/msigdb/human/geneset/GOBP_ASPARTATE_FAMILY_AMINO_ACID_BIOSYNTHETIC_PROCESS	AASDHPPT	AASS	ADI1	APIP	ASNS	ASNSD1	BHMT	BHMT2	ENOPH1	GOT1	GOT1L1	GOT2	MRI1	MTAP	MTHFD1	MTHFD2L	MTHFR	MTR	MTRR	PLOD2	PLOD3
GOBP_ASPARTATE_FAMILY_AMINO_ACID_CATABOLIC_PROCESS	https://www.gsea-msigdb.org/gsea/msigdb/human/geneset/GOBP_ASPARTATE_FAMILY_AMINO_ACID_CATABOLIC_PROCESS	AADAT	AASS	ASPA	ASRGL1	CRYM	DDO	DLST	GCAT	GOT1	GOT2	HYKK	MAT1A	PIPOX	RIDA	SDS	SDSL	SLC25A21
GOBP_ASPARTATE_FAMILY_AMINO_ACID_METABOLIC_PROCESS	https://www.gsea-msigdb.org/gsea/msigdb/human/geneset/GOBP_ASPARTATE_FAMILY_AMINO_ACID_METABOLIC_PROCESS	AADAT	AASDHPPT	AASS	ADI1	ADSS1	ADSS2	APIP	ASNS	ASNSD1	ASPA	ASPG	ASRGL1	ASS1	ATF4	BHMT	BHMT2	CRYM	DDO	DLST	ENOPH1	GCAT	GNMT	GOT1	GOT1L1	GOT2	HYKK	MAT1A	MRI1	MSRA	MTAP	MTHFD1	MTHFD2L	MTHFR	MTR	MTRR	NAT8L	NIT2	PHGDH	PIPOX	PLOD2	PLOD3	RIDA	SDS	SDSL	SLC25A12	SLC25A13	SLC25A21	SMS
GOBP_ASPARTATE_METABOLIC_PROCESS	https://www.gsea-msigdb.org/gsea/msigdb/human/geneset/GOBP_ASPARTATE_METABOLIC_PROCESS	ADSS1	ADSS2	ASPA	ASS1	DDO	GOT1	GOT1L1	GOT2
GOBP_ASPARTATE_TRANSMEMBRANE_TRANSPORT	https://www.gsea-msigdb.org/gsea/msigdb/human/geneset/GOBP_ASPARTATE_TRANSMEMBRANE_TRANSPORT	GFAP	LRRC8A	LRRC8C	LRRC8D	LRRC8E	NTSR1	SLC1A1	SLC1A2	SLC1A3	SLC1A4	SLC1A5	SLC1A6	SLC25A12	SLC25A13	SLC25A18	SLC25A22	SLC3A1	SLC7A13	UCP2
GOBP_ASSOCIATIVE_LEARNING	https://www.gsea-msigdb.org/gsea/msigdb/human/geneset/GOBP_ASSOCIATIVE_LEARNING	ABCA7	ABCC8	ABL1	ADAM2	ADCY3	APP	ASIC1	ATP1A2	B3GAT1	B4GALT2	BRAF	BRSK1	BTG2	CDK5	CHRNA7	CHRNB2	CLN3	CLN8	CLSTN2	CSMD1	CTNS	DBH	DDHD2	DRD1	DRD2	DRD3	DRD5	EIF4A3	ELAVL4	FOS	FOXB1	GABRA5	GRIN1	GRIN2A	HIF1A	HMGCR	HRH1	IFT20	ITGB1	KIT	KMT2A	KRAS	LGMN	LRRN4	MAP1A	MECP2	MEIS2	NDRG4
GOBP_ASTRAL_MICROTUBULE_ORGANIZATION	https://www.gsea-msigdb.org/gsea/msigdb/human/geneset/GOBP_ASTRAL_MICROTUBULE_ORGANIZATION	CENPJ	CEP120	CLASP1	DLG1	EZR	KPNB1	LIMK2	NUMA1	RAB11A	TPPP
GOBP_ASTROCYTE_ACTIVATION	https://www.gsea-msigdb.org/gsea/msigdb/human/geneset/GOBP_ASTROCYTE_ACTIVATION	ADORA2A	AGER	APP	C1QA	C5AR1	CNTF	GRN	IFNG	IFNGR1	IL1B	IL6	LDLR	LRP1	MAPT	MIR142	MIR181B1	MIR181C	NAGLU	NR1D1	PSEN1	SMO	TNF	TREM2	TTBK1	ZEB2
GOBP_ASTROCYTE_CELL_MIGRATION	https://www.gsea-msigdb.org/gsea/msigdb/human/geneset/GOBP_ASTROCYTE_CELL_MIGRATION	APCDD1	CCL2	CCL3	CCR2	GPR183	HEXB	MMP14	NR2E1	SCRIB
GOBP_ASTROCYTE_DEVELOPMENT	https://www.gsea-msigdb.org/gsea/msigdb/human/geneset/GOBP_ASTROCYTE_DEVELOPMENT	ADORA2A	AGER	APP	C1QA	C5AR1	CDK6	CNTF	DLL1	DRD1	EIF2B5	GFAP	GRN	IFNG	IFNGR1	IL1B	IL6	KRAS	LAMB2	LAMC3	LDLR	LRP1	MAPT	MIR142	MIR181B1	MIR181C	NAGLU	NF1	NR1D1	PLP1	POU3F2	PSEN1	ROR1	ROR2	S100A8	S100A9	SMO	TLR4	TNF	TREM2	TSPAN2	TTBK1	VIM	ZEB2
GOBP_ASTROCYTE_DIFFERENTIATION	https://www.gsea-msigdb.org/gsea/msigdb/human/geneset/GOBP_ASTROCYTE_DIFFERENTIATION	ABL1	ADORA2A	AGER	APP	BIN1	BMP2	C1QA	C5AR1	CDK6	CLCF1	CNTF	CNTN2	CUL4B	DAB1	DLL1	DRD1	EIF2B5	EOMES	EPHA4	F2	GAP43	GCM1	GFAP	GPR37L1	GRN	HES1	HES5	ID2	ID4	IFNG	IFNGR1	IL1B	IL6	IL6ST	KDM4A	KRAS	LAMB2	LAMC3	LARGE1	LDLR	LIF	LRP1	MAG	MAP2K1	MAPK1	MAPK3	MAPT	MBD1
GOBP_ASYMMETRIC_CELL_DIVISION	https://www.gsea-msigdb.org/gsea/msigdb/human/geneset/GOBP_ASYMMETRIC_CELL_DIVISION	ACTR2	ACTR3	ARHGEF2	ASPM	DOCK7	ETV5	FGF13	GOLGA2	ING2	INSC	PARD3	PAX6	POU5F1	RAB10	RGS14	SOX5	TEAD3	WNT9B	ZBTB16
GOBP_ASYMMETRIC_NEUROBLAST_DIVISION	https://www.gsea-msigdb.org/gsea/msigdb/human/geneset/GOBP_ASYMMETRIC_NEUROBLAST_DIVISION	ARHGEF2	DOCK7	FGF13	RAB10	SOX5	TEAD3
GOBP_ATF6_MEDIATED_UNFOLDED_PROTEIN_RESPONSE	https://www.gsea-msigdb.org/gsea/msigdb/human/geneset/GOBP_ATF6_MEDIATED_UNFOLDED_PROTEIN_RESPONSE	ATF6	ATF6B	CREBZF	DDIT3	HSPA5	MBTPS1	MBTPS2	WFS1	XBP1
GOBP_ATP_BIOSYNTHETIC_PROCESS	https://www.gsea-msigdb.org/gsea/msigdb/human/geneset/GOBP_ATP_BIOSYNTHETIC_PROCESS	ADCY10	ALDOA	ANTKMT	ATP5F1A	ATP5F1B	ATP5F1C	ATP5F1D	ATP5F1E	ATP5F1EP2	ATP5MC1	ATP5MC2	ATP5MC3	ATP5ME	ATP5MF	ATP5MG	ATP5MGL	ATP5MJ	ATP5MK	ATP5PB	ATP5PD	ATP5PF	ATP5PO	ATP6V0C	ATP6V1A	ATPSCKMT	COX11	DMAC2L	DNAJC30	ENO1	FLCN	H19	IL4	LDHC	LIPA	MIR675	MT-ATP6	MT-ATP8	MT-ND1	MT-ND2	MT-ND3	MT-ND4	MT-ND4L	MT-ND5	MT-ND6	NDUFA1	NDUFA10	NDUFA11	NDUFA12
GOBP_ATP_METABOLIC_PROCESS	https://www.gsea-msigdb.org/gsea/msigdb/human/geneset/GOBP_ATP_METABOLIC_PROCESS	ABCC6	ADCY10	AK1	AK2	AK4	AK5	ALDOA	ANTKMT	ATP1A2	ATP1B1	ATP5F1A	ATP5F1B	ATP5F1C	ATP5F1D	ATP5F1E	ATP5F1EP2	ATP5IF1	ATP5MC1	ATP5MC2	ATP5MC3	ATP5ME	ATP5MF	ATP5MG	ATP5MGL	ATP5MJ	ATP5MK	ATP5PB	ATP5PD	ATP5PF	ATP5PO	ATP6V0C	ATP6V1A	ATP6V1B1	ATP6V1B2	ATPSCKMT	BAD	BEND3	CLPX	COX11	CTNS	DMAC2L	DNAJC30	DNM1L	ENO1	ENPP1	ENPP3	FIGNL1	FIS1
GOBP_ATP_SYNTHESIS_COUPLED_ELECTRON_TRANSPORT	https://www.gsea-msigdb.org/gsea/msigdb/human/geneset/GOBP_ATP_SYNTHESIS_COUPLED_ELECTRON_TRANSPORT	AFG1L	BID	CCNB1	CDK1	CHCHD2	COA6	COQ9	COX15	COX4I1	COX4I2	COX5A	COX5B	COX6A1	COX6A2	COX6B1	COX6C	COX7A1	COX7A2	COX7A2L	COX7A2P2	COX7B	COX7B2	COX7C	COX8A	COX8C	CYC1	CYCS	DGUOK	DLD	DNAJC15	GHITM	ISCU	MIR210	MT-CO1	MT-CO2	MT-CO3	MT-CYB	MT-ND1	MT-ND2	MT-ND3	MT-ND4	MT-ND4L	MT-ND5	MT-ND6	MTCO2P12	NDUFA1	NDUFA10	NDUFA12
GOBP_ATP_TRANSPORT	https://www.gsea-msigdb.org/gsea/msigdb/human/geneset/GOBP_ATP_TRANSPORT	ABCC6	ADCY10	ANKH	CALHM1	CALHM3	CD47	CR1	SLC17A9	SLC25A17	SLC25A23	SLC25A24	SLC25A25	SLC25A31	SLC25A4	SLC25A41	SLC25A42	SLC25A5	SLC25A6	SLC35B1
GOBP_ATRIAL_CARDIAC_MUSCLE_CELL_MEMBRANE_REPOLARIZATION	https://www.gsea-msigdb.org/gsea/msigdb/human/geneset/GOBP_ATRIAL_CARDIAC_MUSCLE_CELL_MEMBRANE_REPOLARIZATION	CACNA1D	FLNA	KCNA5	KCNE5	KCNJ3	KCNJ5	KCNN2	KCNQ1	MIR328	NPPA	SCN5A
GOBP_ATRIAL_CARDIAC_MUSCLE_CELL_TO_AV_NODE_CELL_COMMUNICATION	https://www.gsea-msigdb.org/gsea/msigdb/human/geneset/GOBP_ATRIAL_CARDIAC_MUSCLE_CELL_TO_AV_NODE_CELL_COMMUNICATION	ANK2	CACNA1C	CACNB2	FLNA	GJA1	GJA5	GJC1	KCNA5	KCNE5	KCNJ3	KCNJ5	KCNN2	KCNQ1	MIR328	NUP155	RYR2	SCN3B	SCN5A	TRPM4
GOBP_ATRIAL_CARDIAC_MUSCLE_TISSUE_DEVELOPMENT	https://www.gsea-msigdb.org/gsea/msigdb/human/geneset/GOBP_ATRIAL_CARDIAC_MUSCLE_TISSUE_DEVELOPMENT	BMP10	BMP4	BVES	CACNA1G	EDNRA	ENG	GATA6	GJB6	HCN4	ISL1	MESP1	MYH6	NKX2-5	NOG	PROX1	SHOX2	TBX18	TBX3	TBX5	TREX1	WNT2	ZIC3
GOBP_ATRIAL_CARDIAC_MUSCLE_TISSUE_MORPHOGENESIS	https://www.gsea-msigdb.org/gsea/msigdb/human/geneset/GOBP_ATRIAL_CARDIAC_MUSCLE_TISSUE_MORPHOGENESIS	BMP10	ENG	MYH6	NOG	PROX1	WNT2
GOBP_ATRIAL_SEPTUM_DEVELOPMENT	https://www.gsea-msigdb.org/gsea/msigdb/human/geneset/GOBP_ATRIAL_SEPTUM_DEVELOPMENT	ACVR1	ANK2	BMPR2	CCN1	DAND5	GATA4	GJA5	HEY2	ISL1	MDM2	MDM4	NKX2-5	NOTCH2	NPHP3	NSD2	SMO	SOX4	TBX20	TBX5	TGFB2	WNT11	WNT5A	ZFPM1
GOBP_ATRIAL_SEPTUM_MORPHOGENESIS	https://www.gsea-msigdb.org/gsea/msigdb/human/geneset/GOBP_ATRIAL_SEPTUM_MORPHOGENESIS	ACVR1	BMPR2	CCN1	GATA4	HEY2	ISL1	NKX2-5	NOTCH2	NSD2	SMO	SOX4	TBX20	TBX5	TGFB2	ZFPM1
GOBP_ATRIOVENTRICULAR_CANAL_DEVELOPMENT	https://www.gsea-msigdb.org/gsea/msigdb/human/geneset/GOBP_ATRIOVENTRICULAR_CANAL_DEVELOPMENT	BMP2	CHD7	ENG	FOXN4	GATA4	GATA6	HAS2	PTPN11	RBPJ	SMAD4	TBX2	TBX20	TBX3
GOBP_ATRIOVENTRICULAR_NODE_DEVELOPMENT	https://www.gsea-msigdb.org/gsea/msigdb/human/geneset/GOBP_ATRIOVENTRICULAR_NODE_DEVELOPMENT	BMPR1A	GATA4	GATA6	KCNJ8	MAML1	NKX2-5	NOTCH1	NOTCH2	TBX5
GOBP_ATRIOVENTRICULAR_VALVE_DEVELOPMENT	https://www.gsea-msigdb.org/gsea/msigdb/human/geneset/GOBP_ATRIOVENTRICULAR_VALVE_DEVELOPMENT	ACVR1	APLNR	AXIN2	BMP2	BMPR1A	BMPR2	CCN1	DCHS1	EFNA1	GATA4	GJA5	HEY1	HEY2	HEYL	MDM2	MDM4	NAGLU	NOTCH1	OLFM1	SLIT3	SMAD4	SMAD6	SOX4	TBX20	TBX5	TGFB2	TGFBR2	TWIST1	ZFPM1
GOBP_ATRIOVENTRICULAR_VALVE_FORMATION	https://www.gsea-msigdb.org/gsea/msigdb/human/geneset/GOBP_ATRIOVENTRICULAR_VALVE_FORMATION	DCHS1	GATA4	HEY1	HEY2	NOTCH1	OLFM1	SMAD4	ZFPM1
GOBP_ATTACHMENT_OF_GPI_ANCHOR_TO_PROTEIN	https://www.gsea-msigdb.org/gsea/msigdb/human/geneset/GOBP_ATTACHMENT_OF_GPI_ANCHOR_TO_PROTEIN	GPAA1	PGAP1	PIGK	PIGS	PIGT	PIGU
GOBP_ATTACHMENT_OF_MITOTIC_SPINDLE_MICROTUBULES_TO_KINETOCHORE	https://www.gsea-msigdb.org/gsea/msigdb/human/geneset/GOBP_ATTACHMENT_OF_MITOTIC_SPINDLE_MICROTUBULES_TO_KINETOCHORE	AURKB	BECN1	BIRC5	BOD1	CDCA8	CDT1	CENPC	CENPE	CHAMP1	HNRNPU	INCENP	KAT2B	KAT5	KIF2C	MAD1L1	MAPRE1	MIS12	NDC80	NUF2	RMDN1	SEH1L
GOBP_ATTACHMENT_OF_SPINDLE_MICROTUBULES_TO_KINETOCHORE	https://www.gsea-msigdb.org/gsea/msigdb/human/geneset/GOBP_ATTACHMENT_OF_SPINDLE_MICROTUBULES_TO_KINETOCHORE	ABRAXAS1	ABRAXAS2	APC	AURKB	AURKC	BECN1	BIRC5	BOD1	BUB3	CCNB1	CDC42	CDCA8	CDT1	CENPC	CENPE	CHAMP1	DSN1	ECT2	EML4	HNRNPU	INCENP	KAT2B	KAT5	KIF2C	KNL1	KNSTRN	KNTC1	MAD1L1	MAPRE1	MIS12	NDC80	NEK2	NSL1	NUF2	PMF1	RACGAP1	RB1	RCC2	RMDN1	SEH1L	SGO1	SIRT2	SPAG5	SPC24	SPC25	TEX14	ZNF207	ZW10
GOBP_AUDITORY_RECEPTOR_CELL_DEVELOPMENT	https://www.gsea-msigdb.org/gsea/msigdb/human/geneset/GOBP_AUDITORY_RECEPTOR_CELL_DEVELOPMENT	ANKRD24	CDH23	CLRN1	CLRN2	GRXCR2	KCNQ1	LHFPL5	MYO7A	NHERF1	PAFAH1B1	PDZD7	PLS1	SCRIB	SEC24B	SLC4A7	SLITRK6	SOD1	STRC	TECTA	TMC1	TPRN	TRIOBP	WDPCP	WHRN
GOBP_AUDITORY_RECEPTOR_CELL_MORPHOGENESIS	https://www.gsea-msigdb.org/gsea/msigdb/human/geneset/GOBP_AUDITORY_RECEPTOR_CELL_MORPHOGENESIS	ANKRD24	CDH23	CLRN1	CLRN2	GRXCR2	LHFPL5	MYO7A	NHERF1	PDZD7	PLS1	SCRIB	SEC24B	SLITRK6	SOD1	STRC	TECTA	TPRN	TRIOBP	WDPCP	WHRN
GOBP_AUTOCRINE_SIGNALING	https://www.gsea-msigdb.org/gsea/msigdb/human/geneset/GOBP_AUTOCRINE_SIGNALING	CX3CL1	CX3CR1	FZD1	HILPDA	S100A8	S100A9	SERPINB3
GOBP_AUTONOMIC_NERVOUS_SYSTEM_DEVELOPMENT	https://www.gsea-msigdb.org/gsea/msigdb/human/geneset/GOBP_AUTONOMIC_NERVOUS_SYSTEM_DEVELOPMENT	ACKR3	ADARB1	ASCL1	CTNNB1	EDNRA	EDNRB	EGR2	FN1	FZD3	GATA3	GBX2	GDNF	GFRA3	HAND2	HES1	HLX	HOXB1	HOXB2	INSM1	KIF26A	NAV2	NF1	NRP1	NRP2	NTRK1	PHACTR4	PHOX2A	PHOX2B	PLXNA3	PLXNA4	PRLH	RET	SEMA3A	SEMA3F	SIX1	SLC6A4	SOX10	SOX11	SOX4	SOX8	TBX1	TFAP2A	TFAP2B	TLX2	TP63	VCAM1
GOBP_AUTOPHAGIC_CELL_DEATH	https://www.gsea-msigdb.org/gsea/msigdb/human/geneset/GOBP_AUTOPHAGIC_CELL_DEATH	ATG5	BNIP3	CDKN1B	CDKN2D	DAPK1	LAPTM5	SH3GLB1	TP53INP1	TREM2
GOBP_AUTOPHAGOSOME_LYSOSOME_FUSION	https://www.gsea-msigdb.org/gsea/msigdb/human/geneset/GOBP_AUTOPHAGOSOME_LYSOSOME_FUSION	ARL8B	ATP13A2	CLN3	PIP4K2A	PIP4K2B	PLEKHM1	RUBCNL	TOM1	VPS39
GOBP_AUTOPHAGOSOME_MATURATION	https://www.gsea-msigdb.org/gsea/msigdb/human/geneset/GOBP_AUTOPHAGOSOME_MATURATION	ADRB2	ATG12	ATG14	ATG5	ATP2A2	BECN1	CALCOCO2	CALM1	CHMP1A	CHMP1B	CHMP2A	CHMP2B	CHMP3	CHMP4A	CHMP4B	CHMP4BP1	CHMP4C	CHMP5	CHMP6	CHMP7	CLEC16A	CLN3	EPG5	FYCO1	IRGM	LAMP2	LIX1	LIX1L	MAP1LC3A	MAP1LC3B	MAP1LC3B2	MAP1LC3C	MCOLN1	MFSD8	PHF23	PIK3C3	PIK3R4	RUBCN	RUBCNL	SMCR8	SNAP29	SNAPIN	SNX14	STX17	TBC1D25	TECPR1	TMEM39A	TOM1
GOBP_AUTOPHAGOSOME_MEMBRANE_DOCKING	https://www.gsea-msigdb.org/gsea/msigdb/human/geneset/GOBP_AUTOPHAGOSOME_MEMBRANE_DOCKING	ATG14	ATP2A2	CALM1	SNAP29	STX17	VAMP8	VMP1
GOBP_AUTOPHAGOSOME_ORGANIZATION	https://www.gsea-msigdb.org/gsea/msigdb/human/geneset/GOBP_AUTOPHAGOSOME_ORGANIZATION	AMBRA1	AP4M1	ARFIP2	ATG10	ATG101	ATG12	ATG13	ATG14	ATG16L1	ATG16L2	ATG2A	ATG2B	ATG3	ATG4A	ATG4B	ATG4C	ATG4D	ATG5	ATG7	ATG9A	ATG9B	ATP13A2	ATP2A2	BAG3	BECN1	BECN2	C9orf72	CLN3	CTSD	DNAJC16	EFNB1	EHMT2	ELAPOR1	EMC6	EPHB2	FEZ1	FEZ2	GABARAP	GABARAPL1	GABARAPL2	GABARAPL3	GBA1	IFT20	IFT88	IRGM	LRBA	LRRK2	LRSAM1
GOBP_AUTOPHAGY_OF_MITOCHONDRION	https://www.gsea-msigdb.org/gsea/msigdb/human/geneset/GOBP_AUTOPHAGY_OF_MITOCHONDRION	ADCY10	AMBRA1	ARFIP2	ATG12	ATG13	ATG14	ATG2A	ATG2B	ATG3	ATG4B	ATG4D	ATG5	ATG7	ATG9A	ATG9B	ATP13A2	ATP5IF1	BECN1	BNIP3	BNIP3L	CAMKK2	CDC37	CERS1	CISD2	CSNK2A2	CTSK	CTTN	DNM1L	FBXL4	FBXO7	FBXW7	FIS1	FKBP8	FUNDC1	FUNDC2	FZD5	GABARAP	GABARAPL1	GABARAPL2	GABARAPL3	GBA1	GSK3A	HAX1	HDAC6	HIF1A	HK2	HTRA2	HTT
GOBP_AUTOPHAGY_OF_PEROXISOME	https://www.gsea-msigdb.org/gsea/msigdb/human/geneset/GOBP_AUTOPHAGY_OF_PEROXISOME	ACBD5	ATM	PEX2	PEX5	PIK3C3	PIK3R4	PJVK	RB1CC1	SQSTM1	USP30
GOBP_AV_NODE_CELL_TO_BUNDLE_OF_HIS_CELL_COMMUNICATION	https://www.gsea-msigdb.org/gsea/msigdb/human/geneset/GOBP_AV_NODE_CELL_TO_BUNDLE_OF_HIS_CELL_COMMUNICATION	CACNA1C	CACNA1G	CACNB2	CXADR	GJA5	GJC1	GJC3	GJD3	MIR208A	RYR2	SCN10A	SCN4B	SCN5A	TRPM4
GOBP_AV_NODE_CELL_TO_BUNDLE_OF_HIS_CELL_SIGNALING	https://www.gsea-msigdb.org/gsea/msigdb/human/geneset/GOBP_AV_NODE_CELL_TO_BUNDLE_OF_HIS_CELL_SIGNALING	CACNA1C	CACNA1G	CACNB2	CXADR	GJA5	MIR208A	RYR2	SCN10A	SCN4B	SCN5A	TRPM4
GOBP_AXIAL_MESODERM_DEVELOPMENT	https://www.gsea-msigdb.org/gsea/msigdb/human/geneset/GOBP_AXIAL_MESODERM_DEVELOPMENT	AXIN1	EPB41L5	EPHA2	FOXH1	NODAL	NOG	POGLUT1	RPL38	ZIC3
GOBP_AXIS_ELONGATION	https://www.gsea-msigdb.org/gsea/msigdb/human/geneset/GOBP_AXIS_ELONGATION	AREG	BMP4	ESR1	FGF1	FGF10	FGFR2	HNF1B	HOXD13	MAGI2	MED1	MED12	NKD1	PRICKLE1	PTK7	RDH10	SFRP1	SFRP2	SHH	SIX1	SIX4	SOX9	SPRY1	SPRY2	TNC	TRIM28	WNT11	WNT3A	WNT5A	YAP1
GOBP_AXIS_SPECIFICATION	https://www.gsea-msigdb.org/gsea/msigdb/human/geneset/GOBP_AXIS_SPECIFICATION	AHI1	ARL13B	AURKA	AXIN1	AXIN2	BASP1	BCOR	BMP4	BMPR1A	C2CD3	CDX1	CDX2	CDX4	CER1	CHRDL1	CITED2	COBL	CTNNB1	CXXC4	DCANP1	DDIT3	DLL1	EPB41L5	ETS2	FGF10	FOXA2	FRS2	FUT6	FZD5	GDF3	GPC3	HEY2	HOXD8	IFT172	IFT25	IRX4	LDB1	LEFTY1	LEFTY2	LHX1	MDFI	MESP1	MESP2	MNS1	NEUROG1	NODAL	NOTCH1	NOTCH2
GOBP_AXONAL_FASCICULATION	https://www.gsea-msigdb.org/gsea/msigdb/human/geneset/GOBP_AXONAL_FASCICULATION	AMIGO1	ARHGAP35	CASP3	CDK5R1	CNR1	CNTN2	CNTN4	CRTAC1	EPHA3	EPHA4	EPHB2	EPHB3	FEZF2	MEGF8	NCAM2	NDN	NRCAM	NRP1	RTN4	SEMA5A	TNFRSF21
GOBP_AXONAL_TRANSPORT	https://www.gsea-msigdb.org/gsea/msigdb/human/geneset/GOBP_AXONAL_TRANSPORT	ACTR10	AGBL4	AGTPBP1	AP3B1	AP3B2	AP3D1	AP3M1	AP3M2	AP3S1	AP3S2	ARL8A	ARL8B	ARMCX3	BLOC1S1	BLOC1S2	BLOC1S3	BLOC1S4	BLOC1S5	BLOC1S6	BORCS5	CALY	DCTN1	DLG2	DST	DTNBP1	DYNC1H1	FBXW11	FEZ1	HAP1	HDAC6	HIF1A	HSBP1	HSPB1	KIF1A	KIF1B	KIF1C	KIF3A	KIF3B	KIF4A	KIF5A	KIF5B	KIF5C	MAP1A	MAP2	MAPK8IP3	MAPT	MECP2	MGARP
GOBP_AXONAL_TRANSPORT_OF_MITOCHONDRION	https://www.gsea-msigdb.org/gsea/msigdb/human/geneset/GOBP_AXONAL_TRANSPORT_OF_MITOCHONDRION	ACTR10	AGBL4	AGTPBP1	ARMCX3	FEZ1	HAP1	HDAC6	HIF1A	HSBP1	MAPT	MGARP	NEFL	OPA1	SPAST	SYBU	TRAK1	TRAK2	UCHL1
GOBP_AXONEMAL_CENTRAL_APPARATUS_ASSEMBLY	https://www.gsea-msigdb.org/gsea/msigdb/human/geneset/GOBP_AXONEMAL_CENTRAL_APPARATUS_ASSEMBLY	CFAP91	DNAJB13	HYDIN	RSPH9	SPAG17	SPEF1
GOBP_AXONEMAL_DYNEIN_COMPLEX_ASSEMBLY	https://www.gsea-msigdb.org/gsea/msigdb/human/geneset/GOBP_AXONEMAL_DYNEIN_COMPLEX_ASSEMBLY	CCDC103	CCDC39	CCDC40	CCDC63	CCDC65	CFAP100	CFAP73	CLXN	DAW1	DNAAF1	DNAAF10	DNAAF11	DNAAF2	DNAAF3	DNAAF4	DNAAF5	DNAAF6	DNAAF8	DNAH1	DNAH17	DNAH2	DNAH5	DNAH7	DNAH8	DNAI1	DNAI2	DNAI3	DNAI4	DNAL1	DRC1	LRRC61	NISCH	ODAD1	ODAD2	ODAD3	ODAD4	SPAG1	TEKT2	TTC12	ZMYND10
GOBP_AXONEME_ASSEMBLY	https://www.gsea-msigdb.org/gsea/msigdb/human/geneset/GOBP_AXONEME_ASSEMBLY	ARMC2	BBS2	CC2D2A	CCDC103	CCDC39	CCDC40	CCDC63	CCDC65	CEP131	CFAP100	CFAP157	CFAP206	CFAP43	CFAP44	CFAP46	CFAP47	CFAP58	CFAP65	CFAP69	CFAP73	CFAP74	CFAP91	CFAP97D1	CLUAP1	CLXN	CPLANE2	DAW1	DCX	DNAAF1	DNAAF10	DNAAF11	DNAAF2	DNAAF3	DNAAF4	DNAAF5	DNAAF6	DNAAF8	DNAH1	DNAH17	DNAH2	DNAH5	DNAH7	DNAH8	DNAI1	DNAI2	DNAI3	DNAI4	DNAJB13
GOBP_AXONOGENESIS_INVOLVED_IN_INNERVATION	https://www.gsea-msigdb.org/gsea/msigdb/human/geneset/GOBP_AXONOGENESIS_INVOLVED_IN_INNERVATION	ECE1	EDN1	EDNRA	ITGA4	NPR2	NPTX1	NRP1	NTRK1	SEMA3A
GOBP_AXON_CHOICE_POINT_RECOGNITION	https://www.gsea-msigdb.org/gsea/msigdb/human/geneset/GOBP_AXON_CHOICE_POINT_RECOGNITION	APP	EFNB3	FOXG1	GAP43	ROBO1	ROBO2	ROBO3
GOBP_AXON_DEVELOPMENT	https://www.gsea-msigdb.org/gsea/msigdb/human/geneset/GOBP_AXON_DEVELOPMENT	ABL1	ACTB	ACTBL2	ACTG1	ACTL9	ADAM17	ADARB1	ADCY1	ADCY10	ADGRB1	ADNP	AFG3L2	ALCAM	AMIGO1	ANAPC2	ANK3	ANOS1	APBB1	APLP1	APLP2	APOA4	APOD	APOE	APP	ARHGAP35	ARHGAP4	ARHGEF25	ARHGEF28	ARHGEF40	ARTN	ARX	ATL1	ATOH1	ATOH7	ATP8A2	AUTS2	B3GNT2	B4GALT5	B4GALT6	B4GAT1	BAIAP2	BARHL2	BCL11B	BCL2	BDNF	BHLHA15	BHLHE22	BHLHE23
GOBP_AXON_ENSHEATHMENT_IN_CENTRAL_NERVOUS_SYSTEM	https://www.gsea-msigdb.org/gsea/msigdb/human/geneset/GOBP_AXON_ENSHEATHMENT_IN_CENTRAL_NERVOUS_SYSTEM	ABCA2	ASPA	B4GALT5	B4GALT6	CLU	CNTN1	CNTN2	CNTNAP1	ERCC2	FA2H	GPM6B	HES5	ID4	KCNJ10	MAG	MAL	MIOS	MIR26A1	MOBP	MYRF	NCSTN	NKX6-2	PLP1	PTEN	SOX10	TENM4	TLR2
GOBP_AXON_EXTENSION	https://www.gsea-msigdb.org/gsea/msigdb/human/geneset/GOBP_AXON_EXTENSION	ABL1	ADCY10	ADNP	ALCAM	ANAPC2	APOE	ARHGAP4	AUTS2	BARHL2	BMPR2	C9orf72	CDH1	CDH4	CDK5	CDKL3	CDKL5	CTTN	CXCL12	CYFIP1	DCLK1	DIP2B	DISC1	DNM2	DRAXIN	DSCAM	DVL1	EDN1	EDN2	EDN3	EDNRA	EIF4G2	FN1	GDI1	GOLGA4	GSK3B	HDAC6	HSP90AA1	HSP90AB1	IFRD1	ISLR2	ITGB1	KIAA0319	L1CAM	LAMB2	LHX2	LIMK1	MACF1	MAG
GOBP_AXON_GUIDANCE	https://www.gsea-msigdb.org/gsea/msigdb/human/geneset/GOBP_AXON_GUIDANCE	ADAM17	ALCAM	ANOS1	APP	ARHGAP35	ARHGEF25	ARHGEF40	ARTN	ARX	ATOH1	ATOH7	B3GNT2	B4GAT1	BCL11B	BDNF	BMP7	BMPR1B	BMPR2	BOC	CDH4	CDK5	CDK5R1	CDK5R2	CHL1	CHN1	CNTN1	CNTN2	CNTN4	CNTN5	CNTN6	CRPPA	CSF1R	CXCL12	CYFIP1	CYFIP2	DAG1	DCC	DLX5	DPYSL5	DRAXIN	DRGX	DSCAM	DSCAML1	DVL1	ECE1	EDN1	EDN3	EDNRA
GOBP_AXON_MIDLINE_CHOICE_POINT_RECOGNITION	https://www.gsea-msigdb.org/gsea/msigdb/human/geneset/GOBP_AXON_MIDLINE_CHOICE_POINT_RECOGNITION	APP	FOXG1	ROBO1	ROBO2	ROBO3
GOBP_AXO_DENDRITIC_PROTEIN_TRANSPORT	https://www.gsea-msigdb.org/gsea/msigdb/human/geneset/GOBP_AXO_DENDRITIC_PROTEIN_TRANSPORT	DLG2	HSPB1	KIF5A	KIF5B	KIF5C	MAP1A	MAPK8IP3	NETO1	RAB27B
GOBP_AXO_DENDRITIC_TRANSPORT	https://www.gsea-msigdb.org/gsea/msigdb/human/geneset/GOBP_AXO_DENDRITIC_TRANSPORT	ACTR10	AGBL4	AGTPBP1	AP3B1	AP3B2	AP3D1	AP3M1	AP3M2	AP3S1	AP3S2	APBA1	APP	ARL8A	ARL8B	ARMCX3	BLOC1S1	BLOC1S2	BLOC1S3	BLOC1S4	BLOC1S5	BLOC1S6	BORCS5	CALY	DCTN1	DLG2	DST	DTNBP1	DYNC1H1	FBXW11	FEZ1	FLOT2	HAP1	HDAC6	HIF1A	HNRNPU	HSBP1	HSPA8	HSPB1	KIF17	KIF1A	KIF1B	KIF1C	KIF3A	KIF3B	KIF4A	KIF5A	KIF5B	KIF5C
GOBP_AZOLE_TRANSMEMBRANE_TRANSPORT	https://www.gsea-msigdb.org/gsea/msigdb/human/geneset/GOBP_AZOLE_TRANSMEMBRANE_TRANSPORT	SLC15A4	SLC19A2	SLC19A3	SLC22A1	SLC22A2	SLC25A19	SLC25A29	SLC28A1	SLC28A2	SLC38A3	SLC38A5	SLC44A4	SLC47A1	SLC7A1
GOBP_BARBED_END_ACTIN_FILAMENT_CAPPING	https://www.gsea-msigdb.org/gsea/msigdb/human/geneset/GOBP_BARBED_END_ACTIN_FILAMENT_CAPPING	ADD1	ADD2	ADD3	AVIL	CAPG	CAPZA1	CAPZA2	CAPZA3	CAPZB	CARMIL1	CARMIL2	CRACD	EPS8	FLII	GSN	MTPN	RDX	SCIN	SVIL	TRIOBP	TWF1	TWF2	VIL1	VILL	WASHC2C
GOBP_BASEMENT_MEMBRANE_ASSEMBLY	https://www.gsea-msigdb.org/gsea/msigdb/human/geneset/GOBP_BASEMENT_MEMBRANE_ASSEMBLY	CLASP1	CLASP2	DAG1	NTN4	PHLDB1	PHLDB2	PLOD3	PXDN	RAMP2
GOBP_BASEMENT_MEMBRANE_ORGANIZATION	https://www.gsea-msigdb.org/gsea/msigdb/human/geneset/GOBP_BASEMENT_MEMBRANE_ORGANIZATION	CAV1	CAV2	CLASP1	CLASP2	CMA1	COL3A1	COL4A1	CTSS	DAG1	EXT1	FERMT1	FLRT2	GAS2	HMCN1	HPN	ITGB1	LAMA1	LAMA2	LAMB1	LAMB2	LAMC1	LARGE1	MMP11	NID1	NID2	NTN4	PHLDB1	PHLDB2	PLOD3	POMGNT1	POMT2	PRICKLE1	PXDN	RAMP2	RIC8A	SPINT2
GOBP_BASE_CONVERSION_OR_SUBSTITUTION_EDITING	https://www.gsea-msigdb.org/gsea/msigdb/human/geneset/GOBP_BASE_CONVERSION_OR_SUBSTITUTION_EDITING	A1CF	ADAD1	ADAD2	ADAR	ADARB1	ADARB2	ADAT2	AICDA	APOBEC1	APOBEC2	APOBEC3A	APOBEC3B	APOBEC3C	APOBEC3D	APOBEC3F	APOBEC3G	APOBEC3H	METTL3	RBM47
GOBP_BASE_EXCISION_REPAIR	https://www.gsea-msigdb.org/gsea/msigdb/human/geneset/GOBP_BASE_EXCISION_REPAIR	ADPRS	APEX1	APEX2	DNA2	ERCC5	ERCC6	FAM168A	FEN1	HMGA2	HUWE1	LIG1	LIG3	MBD4	MPG	MUTYH	NEIL1	NEIL2	NEIL3	NTHL1	OGG1	PARG	PARP1	PARP2	PCNA	PNKP	POLB	POLD1	POLE	POLG	POLL	POLQ	PRMT6	RPA1	RPA2	RPA3	RPS3	SIRT6	SMUG1	TDG	UNG	USP47	WRN	XPA	XRCC1
GOBP_BASE_EXCISION_REPAIR_AP_SITE_FORMATION	https://www.gsea-msigdb.org/gsea/msigdb/human/geneset/GOBP_BASE_EXCISION_REPAIR_AP_SITE_FORMATION	ERCC5	MBD4	MPG	MUTYH	NEIL1	NEIL2	NEIL3	NTHL1	OGG1	SMUG1	TDG	UNG
GOBP_BASE_EXCISION_REPAIR_GAP_FILLING	https://www.gsea-msigdb.org/gsea/msigdb/human/geneset/GOBP_BASE_EXCISION_REPAIR_GAP_FILLING	ADPRS	APEX1	FEN1	LIG1	LIG3	NEIL1	PARG	PCNA	PNKP	POLB	POLD1	POLE	POLG	POLL
GOBP_BASIC_AMINO_ACID_TRANSPORT	https://www.gsea-msigdb.org/gsea/msigdb/human/geneset/GOBP_BASIC_AMINO_ACID_TRANSPORT	CLN3	SLC11A1	SLC15A4	SLC22A2	SLC25A15	SLC25A2	SLC25A29	SLC38A3	SLC38A4	SLC38A9	SLC3A1	SLC3A2	SLC47A1	SLC66A1	SLC7A1	SLC7A2	SLC7A3	SLC7A4	SLC7A5	SLC7A6	SLC7A7	SLC7A9
GOBP_BASOLATERAL_PROTEIN_SECRETION	https://www.gsea-msigdb.org/gsea/msigdb/human/geneset/GOBP_BASOLATERAL_PROTEIN_SECRETION	AP1B1	AP1G1	AP1M2	AP1S1	SLC4A8
GOBP_BEHAVIOR	https://www.gsea-msigdb.org/gsea/msigdb/human/geneset/GOBP_BEHAVIOR	AAAS	ABAT	ABCA2	ABCA7	ABCC8	ABHD12	ABL1	ABL2	ACE	ACE2	ACVR2A	ADA	ADAM11	ADAM2	ADARB1	ADCY1	ADCY3	ADCY5	ADCY8	ADGRB3	ADGRF1	ADM2	ADNP	ADORA1	ADORA2A	ADRB1	ADRB3	AFF2	AGER	AGRP	AGTPBP1	AGTR2	AHI1	AIM2	AKT1	ALDH1A3	ALK	ALS2	AMFR	ANKH	APBA1	APBA2	APLN	APOE	APP	APRT	ARC	ARCN1
GOBP_BEHAVIORAL_RESPONSE_TO_COCAINE	https://www.gsea-msigdb.org/gsea/msigdb/human/geneset/GOBP_BEHAVIORAL_RESPONSE_TO_COCAINE	ABAT	CDK5	DRD1	DRD2	DRD3	DRD4	EHMT2	FADD	HOMER1	HOMER2	HTR2A	OPRK1	PPP1R1B	SDK1
GOBP_BEHAVIORAL_RESPONSE_TO_ETHANOL	https://www.gsea-msigdb.org/gsea/msigdb/human/geneset/GOBP_BEHAVIORAL_RESPONSE_TO_ETHANOL	CHRNA7	CRHBP	CRHR1	DBH	DRD2	DRD4	EPS8	HDAC2	OPRM1	USP46
GOBP_BEHAVIORAL_RESPONSE_TO_NICOTINE	https://www.gsea-msigdb.org/gsea/msigdb/human/geneset/GOBP_BEHAVIORAL_RESPONSE_TO_NICOTINE	CHRNA3	CHRNA4	CHRNA5	CHRNA7	CHRNB1	CHRNB2	CHRNB4	GRM2	PPARA
GOBP_BEHAVIORAL_RESPONSE_TO_PAIN	https://www.gsea-msigdb.org/gsea/msigdb/human/geneset/GOBP_BEHAVIORAL_RESPONSE_TO_PAIN	ADAM11	AKT1	CAPN2	LPAR5	MTOR	NTRK1	P2RX2	P2RX3	P2RX4	PIRT	SCN11A	SCN3A	SCN9A	TACR1	THBS1	THBS4	TRPV1	TSPO	VWA1
GOBP_BENZENE_CONTAINING_COMPOUND_METABOLIC_PROCESS	https://www.gsea-msigdb.org/gsea/msigdb/human/geneset/GOBP_BENZENE_CONTAINING_COMPOUND_METABOLIC_PROCESS	AADAT	ACAA1	ACSM1	AFMID	ALDH8A1	CYP1B1	CYP2E1	CYP4B1	EPHX2	FAH	GOT2	GSTM1	GSTM2	GSTM3	GSTM4	HAAO	IDO1	IDO2	KMO	KYAT1	KYAT3	KYNU	SRD5A2	TDO2	TH	UGT1A1
GOBP_BERGMANN_GLIAL_CELL_DIFFERENTIATION	https://www.gsea-msigdb.org/gsea/msigdb/human/geneset/GOBP_BERGMANN_GLIAL_CELL_DIFFERENTIATION	ABL1	GFAP	GPR37L1	MAP2K1	MAPK1	MAPK3	PLPP3	PTPN11	SHH	TTC21B	VIM
GOBP_BICARBONATE_TRANSPORT	https://www.gsea-msigdb.org/gsea/msigdb/human/geneset/GOBP_BICARBONATE_TRANSPORT	BEST1	CA4	CFTR	CYB5R1	CYB5R2	CYB5R4	CYB5RL	RHAG	SLC26A1	SLC26A10P	SLC26A2	SLC26A3	SLC26A4	SLC26A5	SLC26A6	SLC26A7	SLC26A8	SLC26A9	SLC39A10	SLC39A12	SLC39A14	SLC39A4	SLC39A5	SLC39A6	SLC39A8	SLC4A1	SLC4A10	SLC4A11	SLC4A2	SLC4A3	SLC4A4	SLC4A5	SLC4A7	SLC4A8	SLC4A9
GOBP_BILE_ACID_AND_BILE_SALT_TRANSPORT	https://www.gsea-msigdb.org/gsea/msigdb/human/geneset/GOBP_BILE_ACID_AND_BILE_SALT_TRANSPORT	ABCB11	ABCC11	ABCC2	ABCC3	ABCC4	ABCD3	AKR1C1	AKR1C4	AQP9	ATP8B1	CEACAM1	CYP7A1	FGF19	NR0B2	PRKAA1	SLC10A1	SLC10A2	SLC10A3	SLC10A4	SLC10A5	SLC10A6	SLC10A7	SLC27A5	SLC51A	SLC51B	SLCO1A2	SLCO1B1	SLCO1B3	SLCO1C1
GOBP_BILE_ACID_BIOSYNTHETIC_PROCESS	https://www.gsea-msigdb.org/gsea/msigdb/human/geneset/GOBP_BILE_ACID_BIOSYNTHETIC_PROCESS	ABCB11	ABCD3	ACOT8	ACOX2	AKR1C4	AKR1D1	AMACR	BAAT	CES1	CYP27A1	CYP39A1	CYP46A1	CYP7A1	CYP7B1	CYP8B1	FGF19	FGFR4	HSD17B10	HSD3B7	MALRD1	MIR33A	NR1D1	NR1H4	OSBP	OSBPL1A	OSBPL2	OSBPL3	OSBPL6	OSBPL7	OSBPL9	PROX1	SCP2	SIRT1	SLC27A2	SLC27A5	STAR	STARD4
GOBP_BILE_ACID_METABOLIC_PROCESS	https://www.gsea-msigdb.org/gsea/msigdb/human/geneset/GOBP_BILE_ACID_METABOLIC_PROCESS	ABCB11	ABCD3	ACAA1	ACOT8	ACOX2	AKR1C1	AKR1C4	AKR1D1	AMACR	ARV1	ATP8B1	BAAT	CES1	CYP27A1	CYP39A1	CYP46A1	CYP7A1	CYP7B1	CYP8B1	FGF19	FGFR4	GBA2	HSD17B10	HSD3B7	KIT	LEP	MALRD1	MIR33A	NPC1	NR1D1	NR1H4	NR5A2	OSBP	OSBPL1A	OSBPL2	OSBPL3	OSBPL6	OSBPL7	OSBPL9	PANK2	PROX1	SCP2	SIRT1	SLC27A2	SLC27A5	STAR	STARD4	SULT2A1
GOBP_BILE_ACID_SECRETION	https://www.gsea-msigdb.org/gsea/msigdb/human/geneset/GOBP_BILE_ACID_SECRETION	ABCB11	ABCB4	CASR	CES1	MIR33A	NHERF1	PRKAA1	SLC10A1	SLC51A	SLC51B	TNF	UGT1A3
GOBP_BILE_ACID_SIGNALING_PATHWAY	https://www.gsea-msigdb.org/gsea/msigdb/human/geneset/GOBP_BILE_ACID_SIGNALING_PATHWAY	ABCB11	ABCG5	ABCG8	CIDEB	CYP7A1	CYP8B1	GPBAR1	NR1H4	PRKAA1	SLC10A1	VDR
GOBP_BINDING_OF_SPERM_TO_ZONA_PELLUCIDA	https://www.gsea-msigdb.org/gsea/msigdb/human/geneset/GOBP_BINDING_OF_SPERM_TO_ZONA_PELLUCIDA	ACR	ADAM18	ADAM2	ADAM32	ALDOA	ASTL	ATP8B3	B4GALT1	CCT2	CCT3	CCT4	CCT5	CCT7	CCT8	CLGN	CRISP1	FETUB	HSPA1L	LY6K	OVGP1	PAEP	PCSK4	PRSS37	PRSS55	SPA17	SPAM1	TCP1	TEX101	TMPRSS12	UBAP2L	VDAC2	ZAN	ZP1	ZP2	ZP3	ZP4	ZPBP	ZPBP2
GOBP_BIOGENIC_AMINE_METABOLIC_PROCESS	https://www.gsea-msigdb.org/gsea/msigdb/human/geneset/GOBP_BIOGENIC_AMINE_METABOLIC_PROCESS	AANAT	ABAT	ACMSD	AFMID	AGMAT	ALDH2	AMD1	AOC1	AOC2	ASMT	ATP7A	AZIN1	AZIN2	CHRNB2	COMT	DAO	DBH	DDC	DHPS	DRD1	DRD2	DRD3	DRD4	EDNRA	EPAS1	GATA3	GCDH	GCH1	GDE1	GDPD1	GDPD3	GNAT2	GPR37	GRIN2A	HAAO	HAND2	HDAC10	HDAC6	HDC	HNMT	HPRT1	HTR1A	IDO1	IDO2	IL4I1	INSM1	ITGAM	ITGB2
GOBP_BIOLOGICAL_PHASE	https://www.gsea-msigdb.org/gsea/msigdb/human/geneset/GOBP_BIOLOGICAL_PHASE	CDH3	CTNNB1	FERMT1	GAL	MSX2	SPINK5	SYCP2	SYCP2L	TGFB2	WNT10B	WNT5A
GOBP_BIOLOGICAL_PROCESS_INVOLVED_IN_INTERACTION_WITH_HOST	https://www.gsea-msigdb.org/gsea/msigdb/human/geneset/GOBP_BIOLOGICAL_PROCESS_INVOLVED_IN_INTERACTION_WITH_HOST	ACE2	AGTR1	AKT1	ALYREF	ANPEP	APCS	ARL8B	AVP	AVPR1B	AXL	BCL2L1	BECN1	BPIFA1	BSG	CAV1	CAV2	CBL	CCR5	CD209	CD4	CD46	CD55	CD74	CD80	CD81	CD86	CDHR3	CDK1	CH25H	CHMP1A	CHMP1B	CHMP2A	CHMP2B	CHMP3	CHMP4A	CHMP4B	CHMP4BP1	CHMP4C	CHMP5	CHMP6	CHMP7	CIITA	CLDN1	CLDN6	CLDN9	CLEC4G	CLEC4M	CLEC5A
GOBP_BIOLOGICAL_PROCESS_INVOLVED_IN_INTERACTION_WITH_SYMBIONT	https://www.gsea-msigdb.org/gsea/msigdb/human/geneset/GOBP_BIOLOGICAL_PROCESS_INVOLVED_IN_INTERACTION_WITH_SYMBIONT	APCS	APOBEC3H	APOE	APOL1	ARG1	AZU1	CAMP	CARD9	CAV2	CCL3	CCL4	CCL5	CCL8	CCNK	CCNT1	CDC42	CDK9	CFHR1	CFHR2	CFHR5	CFL1	CHD1	CSF1R	CTDP1	CTSG	CX3CR1	CXCL6	CYSRT1	DCD	DDB1	DDX56	DEFA1	DEFA1B	DEFA5	DEFB103A	DEFB103B	EEA1	EEF1A1	EIF2AK4	ELANE	EP300	F2	F2RL1	FASN	FBXL2	FMR1	FN1	GAPDH
GOBP_BIOLOGICAL_PROCESS_INVOLVED_IN_INTERSPECIES_INTERACTION_BETWEEN_ORGANISMS	https://www.gsea-msigdb.org/gsea/msigdb/human/geneset/GOBP_BIOLOGICAL_PROCESS_INVOLVED_IN_INTERSPECIES_INTERACTION_BETWEEN_ORGANISMS	A2M	ABCA1	ABCC8	ABCC9	ABCD2	ABCF3	ABL1	ACE	ACE2	ACOD1	ACP5	ACTA2	ACTG1	ACTR2	ACTR3	ADAM15	ADAM17	ADAM8	ADAM9	ADAMTS13	ADAMTS5	ADAMTS9	ADAR	ADARB1	ADGRB1	ADH5	ADH7	ADIPOQ	ADM	AGBL4	AGBL5	AGTR1	AHR	AICDA	AIF1	AIM2	AIMP1	AKAP1	AKAP12	AKAP8	AKIRIN2	AKT1	ALAD	ALPK1	ALPL	ALYREF	ANG	ANKHD1
GOBP_BIOLOGICAL_PROCESS_INVOLVED_IN_INTRASPECIES_INTERACTION_BETWEEN_ORGANISMS	https://www.gsea-msigdb.org/gsea/msigdb/human/geneset/GOBP_BIOLOGICAL_PROCESS_INVOLVED_IN_INTRASPECIES_INTERACTION_BETWEEN_ORGANISMS	ATXN1	ATXN1L	AVP	AVPR1A	BBS4	BPIFA1	BRINP1	CHD8	CHRNB2	CIC	CLN8	CNTNAP2	CX3CR1	DLG4	DRD3	DRD4	DVL1	EIF4EBP2	EN1	EXT1	GAD1	GNG8	GRID1	GRP	GRPR	KCNQ1	LTF	MAPK8IP2	MECP2	MKKS	NLGN2	NLGN3	NLGN4X	NLGN4Y	NPAS4	NR2E1	NRXN1	NRXN2	NRXN3	OXTR	PCM1	PTCHD1	PTEN	RPTOR	SEPTIN5	SHANK1	SHANK2	SHANK3
GOBP_BIOLOGICAL_PROCESS_INVOLVED_IN_SYMBIOTIC_INTERACTION	https://www.gsea-msigdb.org/gsea/msigdb/human/geneset/GOBP_BIOLOGICAL_PROCESS_INVOLVED_IN_SYMBIOTIC_INTERACTION	ACE2	AGTR1	AKT1	ALYREF	ANPEP	APCS	APOBEC3H	APOE	APOL1	ARG1	ARL8B	AVP	AVPR1B	AXL	AZU1	BCL2L1	BECN1	BPIFA1	BSG	CAMP	CARD9	CAV1	CAV2	CBL	CCL3	CCL4	CCL5	CCL8	CCNK	CCNT1	CCR5	CD209	CD4	CD46	CD55	CD74	CD80	CD81	CD86	CDC42	CDHR3	CDK1	CDK9	CFHR1	CFHR2	CFHR5	CFL1	CH25H
GOBP_BIOMINERAL_TISSUE_DEVELOPMENT	https://www.gsea-msigdb.org/gsea/msigdb/human/geneset/GOBP_BIOMINERAL_TISSUE_DEVELOPMENT	ACTN3	ACVR1	ACVR2A	ACVR2B	ADGRV1	ADRB2	AHSG	ALOX15	ALOX5	ALPL	AMBN	AMELX	AMELY	AMTN	ANKH	ANO6	ASPN	ATF4	ATG4B	ATP2B1	ATRAID	AXIN2	BCOR	BGLAP	BMP2	BMP2K	BMP4	BMP6	BMP7	BMPR1A	BMPR1B	BMPR2	CCDC154	CCL3	CCN1	CCR1	CEBPB	CEMP1	CER1	CFTR	CLEC3B	CNNM4	COL1A1	COL1A2	COMP	CYP27B1	DDR2	DMP1
GOBP_BLASTOCYST_DEVELOPMENT	https://www.gsea-msigdb.org/gsea/msigdb/human/geneset/GOBP_BLASTOCYST_DEVELOPMENT	ACTL6A	ACVR1C	ADA	AGBL4	AKAP3	ARHGDIG	ASF1B	BCOR	BRCA2	BYSL	CAPN2	CCDC24	CCDC62	CCNB1IP1	CDX2	CHEK1	CITED2	CMTM3	CNOT1	CNOT2	CNOT3	COPS2	CTR9	CUL3	DAD1	ELF3	EMG1	EOMES	ETV2	FBLL1	FURIN	GABPA	GINS1	GINS4	HAND1	HNF1B	HOPX	HORMAD1	HS3ST6	IGF1	INTS1	JUNB	KDM4C	KLF4	KPNA7	LATS1	LATS2	LPAR6
GOBP_BLASTOCYST_FORMATION	https://www.gsea-msigdb.org/gsea/msigdb/human/geneset/GOBP_BLASTOCYST_FORMATION	ACTL6A	ADA	BYSL	CCNB1IP1	CDX2	CITED2	CNOT1	CNOT2	CNOT3	CTR9	CUL3	EOMES	FURIN	GABPA	HAND1	HNF1B	HOPX	JUNB	KDM4C	LATS1	LATS2	MATR3	MFN2	MFNG	NLE1	NODAL	PNLDC1	PRDM14	PTPN18	RBM46	RPL7L1	RRP7A	RTN4	SF3B6	SKIL	SOX17	SP3	SRF	SUPT6H	TEAD4	TET1	TM4SF1	WDR74	YAP1	ZP3
GOBP_BLASTOCYST_GROWTH	https://www.gsea-msigdb.org/gsea/msigdb/human/geneset/GOBP_BLASTOCYST_GROWTH	ACVR1C	BRCA2	CHEK1	COPS2	CTR9	GINS1	GINS4	IGF1	INTS1	NBN	NCAPG2	NDEL1	PALB2	PELO	RAD51B	RTF1	SALL4	SBDS	TAF8	UBTFL1	ZNF830	ZPR1
GOBP_BLASTODERM_SEGMENTATION	https://www.gsea-msigdb.org/gsea/msigdb/human/geneset/GOBP_BLASTODERM_SEGMENTATION	BASP1	DCANP1	FRS2	FZD5	HOXD8	LAMA5	NEUROG1	NRP1	NRP2	PCSK6	PLD6	SEMA3F	SHH	TASOR	TBX3	TBXT	TDGF1	TDRD1	TDRD5	TDRD6	TDRD7	TDRKH	TIFAB	WNT5A	WT1
GOBP_BLEB_ASSEMBLY	https://www.gsea-msigdb.org/gsea/msigdb/human/geneset/GOBP_BLEB_ASSEMBLY	ANLN	ANO6	EMP1	EMP2	EMP3	LPAR1	LPAR3	MYLK	P2RX7	PMP22	ROCK1
GOBP_BLOOD_COAGULATION_FIBRIN_CLOT_FORMATION	https://www.gsea-msigdb.org/gsea/msigdb/human/geneset/GOBP_BLOOD_COAGULATION_FIBRIN_CLOT_FORMATION	APOH	F12	F13A1	F13B	F8	FBLN1	FGA	FGB	FGG	FLNA	GP1BA	GP1BB	GP5	GP9	ITGB3	THBD
GOBP_BLOOD_COAGULATION_INTRINSIC_PATHWAY	https://www.gsea-msigdb.org/gsea/msigdb/human/geneset/GOBP_BLOOD_COAGULATION_INTRINSIC_PATHWAY	APOH	F12	F8	FLNA	GP1BA	GP1BB	GP5	GP9
GOBP_BLOOD_VESSEL_ENDOTHELIAL_CELL_DIFFERENTIATION	https://www.gsea-msigdb.org/gsea/msigdb/human/geneset/GOBP_BLOOD_VESSEL_ENDOTHELIAL_CELL_DIFFERENTIATION	CCM2	DLL1	FOXJ2	HEY1	HEY2	KDR	LIPA	MIR10A	MIR34A	NOTCH1	NRP1	PROX1	RBPJ	TMEM100
GOBP_BLOOD_VESSEL_ENDOTHELIAL_CELL_MIGRATION	https://www.gsea-msigdb.org/gsea/msigdb/human/geneset/GOBP_BLOOD_VESSEL_ENDOTHELIAL_CELL_MIGRATION	ABL1	ACVRL1	ADAM17	ADTRP	AGTR2	AKT1	AKT3	AMOT	ANGPT1	ANGPT2	ANGPT4	ANXA1	APOA1	APOE	ATP2B4	ATP5F1A	ATP5F1B	CARD10	CD40	CDH5	CIB1	CLEC14A	CLN3	CSNK2B	CYP1B1	DLL4	EFNA1	EFNB2	EGR3	EMP2	EPHA2	EPHB4	ETS1	FBXW7	FGF18	FGF2	FGFBP1	FGFR1	FOXC2	GADD45A	GATA2	GDF2	GPLD1	GPX1	GREM1	HDAC5	HDAC7	HDAC9
GOBP_BLOOD_VESSEL_ENDOTHELIAL_CELL_PROLIFERATION_INVOLVED_IN_SPROUTING_ANGIOGENESIS	https://www.gsea-msigdb.org/gsea/msigdb/human/geneset/GOBP_BLOOD_VESSEL_ENDOTHELIAL_CELL_PROLIFERATION_INVOLVED_IN_SPROUTING_ANGIOGENESIS	ACVRL1	AGTR1	APELA	APLNR	BMP4	BMPER	DLL4	EPHA2	FGF2	FGFBP1	GATA2	HMOX1	IL12A	IL12B	ITGB1BP1	JCAD	MIR101-1	MIR10A	MIR10B	MIR126	MIR132	MIR146A	MIR149	MIR15A	MIR15B	MIR16-1	MIR193A	MIR21	MIR222	MIR2355	MIR23A	MIR24-1	MIR26A1	MIR27A	MIR27B	MIR29C	MIR342	MIR361	MIR410	MIR424	MIR483	MIR487B	MIR494	MIR495	MIR497	MIR503	MIRLET7B	MMRN2
GOBP_BLOOD_VESSEL_MATURATION	https://www.gsea-msigdb.org/gsea/msigdb/human/geneset/GOBP_BLOOD_VESSEL_MATURATION	ACVRL1	ANKRD17	CDH5	DDIT3	LYL1	MMP2	RECK	S1PR1
GOBP_BLOOD_VESSEL_MORPHOGENESIS	https://www.gsea-msigdb.org/gsea/msigdb/human/geneset/GOBP_BLOOD_VESSEL_MORPHOGENESIS	AAMP	ABCC8	ABL1	ACE	ACKR3	ACTG1	ACVR1	ACVRL1	ADAM12	ADAM15	ADAM8	ADAMTS1	ADAMTS9	ADGRA2	ADGRB1	ADGRB2	ADGRB3	ADGRF5	ADGRG1	ADIPOR2	ADM	ADM2	ADRA2B	ADTRP	AGGF1	AGO1	AGO2	AGTR1	AIMP1	AKT1	AKT3	ALOX5	AMOT	AMOTL1	AMOTL2	ANG	ANGPT1	ANGPT2	ANGPT4	ANGPTL3	ANGPTL4	ANGPTL6	ANPEP	ANXA1	ANXA2	ANXA3	APELA	APLN
GOBP_BLOOD_VESSEL_REMODELING	https://www.gsea-msigdb.org/gsea/msigdb/human/geneset/GOBP_BLOOD_VESSEL_REMODELING	ACE	ACVR2B	ACVRL1	AGT	AGTR2	ATG5	ATP7A	AXL	BAK1	BAX	BCR	BMPR2	CBS	CCR2	CEACAM1	CHD7	CRB1	CST3	DBH	DLL4	EDNRA	ENSG00000274276	EPAS1	EXT1	FGF10	FGF8	FLNA	FLT4	FOXC1	FOXC2	HOXA3	HRG	JAG1	LIF	MDM2	MEF2C	MIR143	MIR17	MIR20A	MIR27B	MIR29B1	NDP	NOS3	NPPC	NPR2	NPR3	RBPJ	RSPO3
GOBP_BODY_FLUID_SECRETION	https://www.gsea-msigdb.org/gsea/msigdb/human/geneset/GOBP_BODY_FLUID_SECRETION	ADA	ADORA1	AGR2	ALOX12B	ANO1	APLN	AQP1	AQP5	ATG5	ATP7A	ATP7B	CAD	CAV1	CCND1	CDO1	CEL	CELSR2	CHRM1	CHRM3	COPA	CREB1	CSN2	CSN3	CYBA	DCANP1	DDR1	EDN1	ERBB4	FGF10	FOSL2	FOXB1	GHRHR	GPAT4	GUCA1B	HIF1A	HK2	HTR4	KCNN4	LACRT	MED1	MT-CO2	MTCO2P12	MTX1	MUC2	NCOA1	NCOR2	NEURL1	NEUROG1
GOBP_BODY_MORPHOGENESIS	https://www.gsea-msigdb.org/gsea/msigdb/human/geneset/GOBP_BODY_MORPHOGENESIS	ANKRD11	ARID5B	ASPH	ATP6AP2	BRAF	CDON	CLASP1	CLASP2	CLDN5	COL1A1	CRISPLD1	CRISPLD2	CSRNP1	DAG1	DKK1	DLX5	EP300	FLVCR1	FUZ	GPC3	GREM2	IFT122	IHH	LEF1	MAB21L2	MMP2	MSX1	MYH3	NIPBL	NOG	PAX9	PDGFRA	PHLDB1	PHLDB2	PLEKHA1	PRICKLE1	PTPN11	RAB3GAP1	RRAS	SCX	SGPL1	SKI	SSBP3	STRA6	TBX1	TGFB3	TIPARP	WNT3
GOBP_BONE_CELL_DEVELOPMENT	https://www.gsea-msigdb.org/gsea/msigdb/human/geneset/GOBP_BONE_CELL_DEVELOPMENT	ANXA2	ATP6AP1	CLDN18	FAM20C	FBN1	FBXW7	FOXP1	GPR68	LILRB1	LRRK1	LTF	NOTCH2	PAFAH1B1	SIGLEC15	SLC9B2	SRC	TNFSF11	TYROBP
GOBP_BONE_DEVELOPMENT	https://www.gsea-msigdb.org/gsea/msigdb/human/geneset/GOBP_BONE_DEVELOPMENT	ACP5	ACTN3	ADAMTS12	ADAMTS7	AKAP13	ALPL	AMER1	ANXA2	ANXA6	ASXL1	ATF2	ATG9A	ATG9B	ATP6AP1	AXIN2	BBX	BGLAP	BGN	BMP2	BMP4	BMP6	BMPR1B	BMPR2	BNC2	BPNT2	CBS	CCDC154	CCN4	CDX1	CER1	CHAD	CHSY1	CITED2	CLDN18	COL13A1	COL1A1	COL27A1	COL2A1	COL3A1	COMP	CSGALNACT1	CTC1	CYP26B1	DCANP1	DCHS1	DDR2	DHRS3	DLX5
GOBP_BONE_GROWTH	https://www.gsea-msigdb.org/gsea/msigdb/human/geneset/GOBP_BONE_GROWTH	ANXA6	ATF2	BNC2	CER1	COL27A1	COMP	DDR2	ECM1	EVC	EXT1	FGFR2	FGFR3	FOSL2	IFT80	LEP	LEPR	MATN1	MMP13	MSX2	NPPC	NPR2	OSTN	RARA	RARB	RARG	SMPD3	SOX9	STC1	TGFBR2	THBS3	TSKU	ZMPSTE24
GOBP_BONE_MARROW_DEVELOPMENT	https://www.gsea-msigdb.org/gsea/msigdb/human/geneset/GOBP_BONE_MARROW_DEVELOPMENT	ASXL1	CTC1	HOXB4	LIPA	LRP5	LRRC17	PTPRC	SBDS	TP53
GOBP_BONE_MATURATION	https://www.gsea-msigdb.org/gsea/msigdb/human/geneset/GOBP_BONE_MATURATION	ACTN3	ADAMTS12	ADAMTS7	BMP2	CCDC154	DCHS1	EBP	EXT1	FGFR3	GH1	GREM1	IFT80	IGF1	LEP	LTF	MBTPS2	PHOSPHO1	PLXNB1	PTH	RFLNA	RFLNB	RHOA	RYR1	SEMA4D	SNX10	THBS3	XYLT1	ZBTB16
GOBP_BONE_MINERALIZATION	https://www.gsea-msigdb.org/gsea/msigdb/human/geneset/GOBP_BONE_MINERALIZATION	ACTN3	ACVR1	ACVR2A	ACVR2B	ADGRV1	ADRB2	AHSG	ALOX15	ALOX5	ALPL	ANKH	ANO6	ASPN	ATF4	ATP2B1	ATRAID	AXIN2	BCOR	BGLAP	BMP2	BMP2K	BMP4	BMP6	BMP7	BMPR1A	BMPR1B	BMPR2	CCDC154	CCL3	CCN1	CCR1	CER1	CLEC3B	COL1A2	COMP	CYP27B1	DDR2	ECM1	EIF2AK3	ENPP1	ERCC2	FAM20C	FBN2	FBXL15	FGF23	FGFR2	FGFR3	FGR
GOBP_BONE_MINERALIZATION_INVOLVED_IN_BONE_MATURATION	https://www.gsea-msigdb.org/gsea/msigdb/human/geneset/GOBP_BONE_MINERALIZATION_INVOLVED_IN_BONE_MATURATION	ACTN3	BMP2	CCDC154	GREM1	IFT80	IGF1	LEP	LTF	PHOSPHO1	PTH	RFLNA	RFLNB	SNX10
GOBP_BONE_MORPHOGENESIS	https://www.gsea-msigdb.org/gsea/msigdb/human/geneset/GOBP_BONE_MORPHOGENESIS	ACP5	ACTN3	ALPL	ANXA6	ATF2	ATG9A	ATG9B	AXIN2	BMP4	BMP6	BMPR1B	BMPR2	BPNT2	CBS	CDX1	CER1	CHSY1	CITED2	COL13A1	COL1A1	COL27A1	COL2A1	COL3A1	COMP	CSGALNACT1	CYP26B1	DCANP1	DHRS3	DLX5	ENSG00000274276	EXT1	EXT2	FGF18	FGF4	FGFR2	FGFR3	FOSL2	FOXC1	FOXN3	FREM1	GHR	GLG1	GLI3	HAS2	HOXA11	IFITM5	IFT80	IHH
GOBP_BONE_REMODELING	https://www.gsea-msigdb.org/gsea/msigdb/human/geneset/GOBP_BONE_REMODELING	ACP5	ADAM8	ADRB2	BGLAP	CALCA	CARTPT	CCDC154	CD38	CLDN18	CSF1R	CSK	CTHRC1	CTNNB1	CTSK	DCSTAMP	DEF8	DOCK5	EFNA2	EPHA2	EXT1	FSHB	GDF5	GJA1	GPR137	GPR137B	GPR55	GREM1	HAMP	HTR1B	IAPP	IHH	IL20RA	IL6	IL7	INPP5D	ITGB3	LEP	LEPR	LGR4	LRP5	LRRK1	LTBP3	MC4R	MDK	MITF	NCDN	NF1	NOTCH2
GOBP_BONE_RESORPTION	https://www.gsea-msigdb.org/gsea/msigdb/human/geneset/GOBP_BONE_RESORPTION	ACP5	ADAM8	ADRB2	BGLAP	CALCA	CARTPT	CCDC154	CD38	CLDN18	CSF1R	CSK	CTNNB1	CTSK	DCSTAMP	DEF8	EXT1	FSHB	GPR137	GPR137B	GPR55	HAMP	IAPP	IHH	IL20RA	IL6	IL7	INPP5D	ITGB3	LRRK1	LTBP3	MC4R	NCDN	NF1	NOX4	P2RX7	PDK4	PLEKHM1	PPARGC1B	PRKCA	PTH	PTH1R	PTK2B	RAB3D	RAB7A	RAC2	S1PR1	SIGLEC15	SLC4A2
GOBP_BONE_TRABECULA_FORMATION	https://www.gsea-msigdb.org/gsea/msigdb/human/geneset/GOBP_BONE_TRABECULA_FORMATION	CHAD	COL1A1	FBN2	GREM1	MMP2	MSX2	PPARGC1B	SFRP1	THBS3	WNT10B
GOBP_BONE_TRABECULA_MORPHOGENESIS	https://www.gsea-msigdb.org/gsea/msigdb/human/geneset/GOBP_BONE_TRABECULA_MORPHOGENESIS	CHAD	COL1A1	FBN2	GREM1	MMP2	MSX2	PLXNB1	PPARGC1B	SBNO2	SEMA4D	SFRP1	THBS3	WNT10B
GOBP_BOX_C_D_SNORNP_ASSEMBLY	https://www.gsea-msigdb.org/gsea/msigdb/human/geneset/GOBP_BOX_C_D_SNORNP_ASSEMBLY	NOPCHAP1	NUFIP1	PIH1D1	PIH1D2	RUVBL1	RUVBL2	SNU13	TAF9	ZNHIT3	ZNHIT6
GOBP_BRADYKININ_CATABOLIC_PROCESS	https://www.gsea-msigdb.org/gsea/msigdb/human/geneset/GOBP_BRADYKININ_CATABOLIC_PROCESS	ACE	CPN1	CTSH	ECE1	IDE	MME	XPNPEP1
GOBP_BRAINSTEM_DEVELOPMENT	https://www.gsea-msigdb.org/gsea/msigdb/human/geneset/GOBP_BRAINSTEM_DEVELOPMENT	ATF2	ATIC	CNTFR	GART	NLGN4X	PHOX2B	SCN5A	SMAD4
GOBP_BRAIN_DERIVED_NEUROTROPHIC_FACTOR_RECEPTOR_SIGNALING_PATHWAY	https://www.gsea-msigdb.org/gsea/msigdb/human/geneset/GOBP_BRAIN_DERIVED_NEUROTROPHIC_FACTOR_RECEPTOR_SIGNALING_PATHWAY	BDNF	FSTL4	NFATC4	NTRK2	RAPGEF2	SLC2A4
GOBP_BRAIN_MORPHOGENESIS	https://www.gsea-msigdb.org/gsea/msigdb/human/geneset/GOBP_BRAIN_MORPHOGENESIS	AKT3	BBS1	BBS2	BBS4	CDH2	CTNNA2	EMX1	FANCC	FANCD2	FBXW11	FGF8	FZD3	FZD6	GBA1	GDF7	GSX2	HESX1	MKKS	NF1	OTX1	PAFAH1B1	PAX2	PROP1	PSEN1	PTEN	SHANK3	SLC4A10	SLC6A4	SLIT1	SMO	SOS1	SPEF2	TUBA1A	UCHL5	VPS51	WNT5A	ZNF335
GOBP_BRANCHED_CHAIN_AMINO_ACID_BIOSYNTHETIC_PROCESS	https://www.gsea-msigdb.org/gsea/msigdb/human/geneset/GOBP_BRANCHED_CHAIN_AMINO_ACID_BIOSYNTHETIC_PROCESS	BCAT1	BCAT2	ILVBL	SDS	SDSL
GOBP_BRANCHED_CHAIN_AMINO_ACID_CATABOLIC_PROCESS	https://www.gsea-msigdb.org/gsea/msigdb/human/geneset/GOBP_BRANCHED_CHAIN_AMINO_ACID_CATABOLIC_PROCESS	ACAD8	ACADSB	ACAT1	ALDH6A1	AUH	BCAT2	BCKDHA	BCKDHB	BCKDK	DBT	DLD	ECHS1	HIBADH	HIBCH	HMGCL	HMGCLL1	HSD17B10	IVD	MCCC1	MCCC2	SLC25A44
GOBP_BRANCHED_CHAIN_AMINO_ACID_METABOLIC_PROCESS	https://www.gsea-msigdb.org/gsea/msigdb/human/geneset/GOBP_BRANCHED_CHAIN_AMINO_ACID_METABOLIC_PROCESS	ACAD8	ACADSB	ACAT1	ALDH6A1	AUH	BCAT1	BCAT2	BCKDHA	BCKDHB	BCKDK	DBT	DLD	ECHS1	HIBADH	HIBCH	HMGCL	HMGCLL1	HSD17B10	ILVBL	IVD	MCCC1	MCCC2	PCCA	PCCB	SDS	SDSL	SLC25A44
GOBP_BRANCHED_CHAIN_AMINO_ACID_TRANSPORT	https://www.gsea-msigdb.org/gsea/msigdb/human/geneset/GOBP_BRANCHED_CHAIN_AMINO_ACID_TRANSPORT	LLGL2	SLC25A44	SLC38A9	SLC3A2	SLC43A1	SLC43A2	SLC6A14	SLC6A15	SLC6A17	SLC6A20	SLC7A5	SLC7A6	SLC7A7	SLC7A8
GOBP_BRANCHING_INVOLVED_IN_BLOOD_VESSEL_MORPHOGENESIS	https://www.gsea-msigdb.org/gsea/msigdb/human/geneset/GOBP_BRANCHING_INVOLVED_IN_BLOOD_VESSEL_MORPHOGENESIS	ABL1	ACVR1	COL4A1	CTNNB1	DLL4	EDN1	EDNRA	ENG	FGF8	FKBPL	FOXC2	GBX2	GDF2	GNA13	IHH	KDR	LEF1	MDK	MIR15B	MIR16-1	NFATC4	NOTCH4	NRARP	NRP1	PLXND1	PPP3R1	RBM15	SEMA3E	SFRP2	SHH	SIRT6	SRF	STK4	TBX20	TGFBR2	VEGFA
GOBP_BRANCHING_INVOLVED_IN_LABYRINTHINE_LAYER_MORPHOGENESIS	https://www.gsea-msigdb.org/gsea/msigdb/human/geneset/GOBP_BRANCHING_INVOLVED_IN_LABYRINTHINE_LAYER_MORPHOGENESIS	ADM	FGFR2	FZD5	GCM1	GRB2	GRHL2	IL10	RSPO3	SOCS3	SPINT1	SPINT2	ST14	TMED2
GOBP_BRANCHING_INVOLVED_IN_MAMMARY_GLAND_DUCT_MORPHOGENESIS	https://www.gsea-msigdb.org/gsea/msigdb/human/geneset/GOBP_BRANCHING_INVOLVED_IN_MAMMARY_GLAND_DUCT_MORPHOGENESIS	AR	AREG	BTRC	CAV3	CSF1	CSMD1	DDR1	EPHA2	ESR1	KDM5B	LRP5	MED1	MSX2	PGR	PHB2	PML	SRC	TBX3	VDR	WNT4	WNT5A
GOBP_BRANCHING_INVOLVED_IN_PROSTATE_GLAND_MORPHOGENESIS	https://www.gsea-msigdb.org/gsea/msigdb/human/geneset/GOBP_BRANCHING_INVOLVED_IN_PROSTATE_GLAND_MORPHOGENESIS	BMP4	BMP7	ESR1	FEM1B	FGFR2	FRS2	HOXA13	HOXB13	HOXD13	NKX3-1	SFRP1	SHH
GOBP_BRANCHING_INVOLVED_IN_SALIVARY_GLAND_MORPHOGENESIS	https://www.gsea-msigdb.org/gsea/msigdb/human/geneset/GOBP_BRANCHING_INVOLVED_IN_SALIVARY_GLAND_MORPHOGENESIS	BMP7	BTBD7	DAG1	ESRP2	FGF10	FGF7	FGF8	FGFR2	HGF	LAMA1	LAMA5	NRP1	NTN4	PDGFA	PLXNA1	PLXND1	SEMA3C	SHH	SNAI2	TGM2	TNF
GOBP_BRANCHING_MORPHOGENESIS_OF_AN_EPITHELIAL_TUBE	https://www.gsea-msigdb.org/gsea/msigdb/human/geneset/GOBP_BRANCHING_MORPHOGENESIS_OF_AN_EPITHELIAL_TUBE	ABL1	ACVR1	ADAMTS16	AGT	AGTR2	AR	AREG	BCL2	BMP2	BMP4	BMP7	BTRC	CASR	CAV3	CELSR1	CITED1	CLIC4	COL4A1	CSF1	CSMD1	CTNNB1	CTNNBIP1	CTSH	CTSZ	DAG1	DCHS1	DDR1	DLG1	DLG5	DLL4	EDN1	EDNRA	EGF	ENG	EPHA2	ESR1	ESRP2	EXT1	EYA1	FGF1	FGF10	FGF2	FGF8	FGFR2	FKBPL	FOXA1	FOXC2	FOXD1
GOBP_BRANCHING_MORPHOGENESIS_OF_A_NERVE	https://www.gsea-msigdb.org/gsea/msigdb/human/geneset/GOBP_BRANCHING_MORPHOGENESIS_OF_A_NERVE	BCL11A	DLX2	DRD2	EPHA7	FGF13	FGFR2	LRRK2	MAP3K13	MECP2	RERE	RTN4	SHOX2
GOBP_BRANCHIOMOTOR_NEURON_AXON_GUIDANCE	https://www.gsea-msigdb.org/gsea/msigdb/human/geneset/GOBP_BRANCHIOMOTOR_NEURON_AXON_GUIDANCE	MYCBP2	NRP1	PLXNA3	PLXNA4	SEMA3F
GOBP_BRANCH_ELONGATION_OF_AN_EPITHELIUM	https://www.gsea-msigdb.org/gsea/msigdb/human/geneset/GOBP_BRANCH_ELONGATION_OF_AN_EPITHELIUM	AREG	BMP4	ESR1	FGF1	FGF10	FGFR2	HNF1B	HOXD13	MED1	RDH10	SHH	SIX1	SIX4	SOX9	SPRY1	SPRY2	TNC	WNT5A	YAP1
GOBP_BRONCHIOLE_DEVELOPMENT	https://www.gsea-msigdb.org/gsea/msigdb/human/geneset/GOBP_BRONCHIOLE_DEVELOPMENT	FGF10	HOXA5	ITGB6	MMP12	TCF21
GOBP_BRONCHUS_DEVELOPMENT	https://www.gsea-msigdb.org/gsea/msigdb/human/geneset/GOBP_BRONCHUS_DEVELOPMENT	ADAMTSL2	AGR2	BMP4	HOXA5	IL13	SOX9	SPDEF	SRF	TGFBR2	TULP3	WNT7B
GOBP_BROWN_FAT_CELL_DIFFERENTIATION	https://www.gsea-msigdb.org/gsea/msigdb/human/geneset/GOBP_BROWN_FAT_CELL_DIFFERENTIATION	ADIG	ADIPOQ	ADRB1	ADRB2	ADRB3	ALDH6A1	ARL4A	BMP7	BNIP3	CEBPA	CEBPB	DHRS7B	DUSP10	EBF2	ERO1A	FABP3	FABP4	FFAR4	FLCN	FNDC5	FTO	GATA2	HNRNPU	INS	LAMB3	LEP	LRG1	MAPK14	MB	METRNL	MIR128-1	NAPEPLD	NUDT7	PEX11A	PIM1	PLAC8	PPARGC1A	PRDM16	PTGS2	RGS2	RREB1	SH2B2	SIRT1	SIX1	SLC2A4	SLC39A13	SLC7A10	SOX13
GOBP_BRUSH_BORDER_ASSEMBLY	https://www.gsea-msigdb.org/gsea/msigdb/human/geneset/GOBP_BRUSH_BORDER_ASSEMBLY	ANKS4B	CDHR2	CDHR5	CTNS	MYO7B	TMIGD1	USH1C
GOBP_BUD_ELONGATION_INVOLVED_IN_LUNG_BRANCHING	https://www.gsea-msigdb.org/gsea/msigdb/human/geneset/GOBP_BUD_ELONGATION_INVOLVED_IN_LUNG_BRANCHING	BMP4	FGF10	FGFR2	RDH10	SPRY1	SPRY2	YAP1
GOBP_BUNDLE_OF_HIS_CELL_TO_PURKINJE_MYOCYTE_COMMUNICATION	https://www.gsea-msigdb.org/gsea/msigdb/human/geneset/GOBP_BUNDLE_OF_HIS_CELL_TO_PURKINJE_MYOCYTE_COMMUNICATION	CACNA2D1	CTNNA3	DSC2	DSG2	DSP	GJA5	JUP	KCNA5	PKP2	RANGRF	SCN10A	SCN5A	TBX5	TNNI3K	TRPM4
GOBP_BUNDLE_OF_HIS_CELL_TO_PURKINJE_MYOCYTE_SIGNALING	https://www.gsea-msigdb.org/gsea/msigdb/human/geneset/GOBP_BUNDLE_OF_HIS_CELL_TO_PURKINJE_MYOCYTE_SIGNALING	CACNA2D1	GJA5	KCNA5	RANGRF	SCN10A	SCN5A	TRPM4
GOBP_B_1_B_CELL_DIFFERENTIATION	https://www.gsea-msigdb.org/gsea/msigdb/human/geneset/GOBP_B_1_B_CELL_DIFFERENTIATION	CD19	CMTM7	MALT1	PLCL2	SLAMF8
GOBP_B_CELL_ACTIVATION	https://www.gsea-msigdb.org/gsea/msigdb/human/geneset/GOBP_B_CELL_ACTIVATION	ABL1	ADA	ADAM17	ADGRG3	AHR	AICDA	AKAP17A	AKIRIN2	APLF	AQP8	ATAD5	ATM	BAD	BAK1	BANK1	BATF	BAX	BCL2	BCL3	BCL6	BLNK	BMI1	BST1	BST2	BTK	C17orf99	CARD11	CASP3	CASP8	CCR6	CD180	CD19	CD22	CD27	CD28	CD300A	CD320	CD38	CD40	CD40LG	CD70	CD74	CD79A	CD79B	CD81	CD86	CDH17	CDKN1A
GOBP_B_CELL_ACTIVATION_INVOLVED_IN_IMMUNE_RESPONSE	https://www.gsea-msigdb.org/gsea/msigdb/human/geneset/GOBP_B_CELL_ACTIVATION_INVOLVED_IN_IMMUNE_RESPONSE	ABL1	ADA	AICDA	APLF	ATAD5	BATF	BCL3	BCL6	C17orf99	CCR6	CD180	CD19	CD28	CD40	CD40LG	CDH17	CLCF1	CR1	DLL1	DOCK10	DOCK11	ERCC1	EXO1	EXOSC3	EXOSC6	FCGR2B	FOXP3	GAPT	GPR183	HMCES	HSPD1	IFNB1	IL10	IL2	IL21	IL27RA	IL4	IL6	IRF8	ITFG2	ITM2A	KMT5B	KMT5C	LFNG	LGALS1	LIG4	MAD2L2	MFNG
GOBP_B_CELL_APOPTOTIC_PROCESS	https://www.gsea-msigdb.org/gsea/msigdb/human/geneset/GOBP_B_CELL_APOPTOTIC_PROCESS	ADA	AURKB	BAK1	BAX	BCL10	BCL2	BCL6	BTK	CD74	CRKL	FNIP1	FOXP1	HSH2D	IL10	IL2	IRS2	LYN	MIF	MIR17HG	NFKBIZ	NOC2L	ORMDL3	PDCD1	PKN1	SLC39A10	TNFRSF21	TRAF3IP2
GOBP_B_CELL_CHEMOTAXIS	https://www.gsea-msigdb.org/gsea/msigdb/human/geneset/GOBP_B_CELL_CHEMOTAXIS	CH25H	CXCL13	CYP7B1	GAS6	HSD3B7	PIK3CD	PTK2B	XCL1
GOBP_B_CELL_DIFFERENTIATION	https://www.gsea-msigdb.org/gsea/msigdb/human/geneset/GOBP_B_CELL_DIFFERENTIATION	ABL1	ADA	ADAM17	ADGRG3	AICDA	AQP8	ATM	BAD	BAK1	BAX	BCL2	BCL3	BCL6	BLNK	BTK	C17orf99	CARD11	CD19	CD27	CD40LG	CD79A	CD79B	CDH17	CEBPG	CLCF1	CMTM7	CR1	CR2	DCAF1	DCLRE1C	DLL1	DNAJB9	DOCK10	DOCK11	EP300	EZH2	FCGR2B	FCRL3	FLT3	FNIP1	FOSL2	FZD9	GPR183	GPS2	HDAC4	HDAC5	HDAC9	HHEX
GOBP_B_CELL_HOMEOSTASIS	https://www.gsea-msigdb.org/gsea/msigdb/human/geneset/GOBP_B_CELL_HOMEOSTASIS	ABL1	ADA	BAK1	BAX	BCL10	BCL2	BCL2L11	CAMLG	CASP3	CD74	DOCK10	DOCK11	FOXP3	GAPT	HIF1A	IL7R	LYN	MEF2C	MIF	MIR17HG	NCKAP1L	PKN1	PPP2R3C	RC3H1	RC3H2	SASH3	SH2B2	SOS1	SOS2	SPNS2	TNFAIP3	TNFRSF13B	TNFSF13B	TRAF3IP2
GOBP_B_CELL_LINEAGE_COMMITMENT	https://www.gsea-msigdb.org/gsea/msigdb/human/geneset/GOBP_B_CELL_LINEAGE_COMMITMENT	BCL2	PRKDC	RAG2	SLAMF8	TCF3	TP53
GOBP_B_CELL_MEDIATED_IMMUNITY	https://www.gsea-msigdb.org/gsea/msigdb/human/geneset/GOBP_B_CELL_MEDIATED_IMMUNITY	AICDA	APLF	ATAD5	BATF	BCL10	BCL3	BCL6	BTK	C17orf99	C1QA	C1QB	C1QBP	C1QC	C1R	C1RL	C1S	C2	C3	C4A	C4B	C4BPA	C4BPB	C5	C6	C7	C8A	C8B	C8G	C9	CARD9	CCR6	CD19	CD226	CD27	CD28	CD40	CD40LG	CD46	CD55	CD70	CD74	CD81	CFI	CLCF1	CLU	CR1	CR1L	CR2
GOBP_B_CELL_PROLIFERATION	https://www.gsea-msigdb.org/gsea/msigdb/human/geneset/GOBP_B_CELL_PROLIFERATION	ABL1	ADA	AHR	ATAD5	ATM	BAX	BCL2	BCL6	BMI1	BST1	BTK	CARD11	CASP3	CD180	CD19	CD22	CD300A	CD320	CD38	CD40	CD40LG	CD70	CD74	CD79A	CD81	CDKN1A	CHRNB2	CLCF1	CR2	CTLA4	CTPS1	EPHB2	FCGR2B	FCRL3	FOSL2	GAPT	GPR183	HSPD1	IFNA1	IFNA10	IFNA13	IFNA14	IFNA16	IFNA17	IFNA2	IFNA21	IFNA4	IFNA5
GOBP_B_CELL_PROLIFERATION_INVOLVED_IN_IMMUNE_RESPONSE	https://www.gsea-msigdb.org/gsea/msigdb/human/geneset/GOBP_B_CELL_PROLIFERATION_INVOLVED_IN_IMMUNE_RESPONSE	ABL1	CD180	CD19	GAPT	PLCL2	TLR4
GOBP_B_CELL_RECEPTOR_SIGNALING_PATHWAY	https://www.gsea-msigdb.org/gsea/msigdb/human/geneset/GOBP_B_CELL_RECEPTOR_SIGNALING_PATHWAY	ABL1	BANK1	BAX	BCAR1	BCL2	BLK	BLNK	BMX	BTK	CD19	CD22	CD300A	CD38	CD79A	CD79B	CD81	CMTM3	CTLA4	FCGR2B	FCRL3	FOXP1	GCSAM	GCSAML	GPS2	GRB2	IGHA1	IGHA2	IGHD	IGHE	IGHG1	IGHG2	IGHG3	IGHG4	IGHM	IGKC	IGLC1	IGLC3	IGLC6	IGLC7	ITK	KLHL6	LAT2	LCK	LIME1	LPXN	LYN	MAPK1	MEF2C
GOBP_C21_STEROID_HORMONE_BIOSYNTHETIC_PROCESS	https://www.gsea-msigdb.org/gsea/msigdb/human/geneset/GOBP_C21_STEROID_HORMONE_BIOSYNTHETIC_PROCESS	ADM	AKR1B1	BMP2	BMP5	BMP6	CACNA1H	CLCN2	CYP11A1	CYP11B1	CYP11B2	DAB2	DGKQ	DKK3	EGR1	FSHB	LHB	REST	STARD3	TSPO	WNT4
GOBP_C21_STEROID_HORMONE_METABOLIC_PROCESS	https://www.gsea-msigdb.org/gsea/msigdb/human/geneset/GOBP_C21_STEROID_HORMONE_METABOLIC_PROCESS	ADM	AFP	AKR1B1	AKR1C1	AKR1C2	AKR1C3	AKR1C4	AKR1D1	BMP2	BMP5	BMP6	CACNA1H	CLCN2	CYP11A1	CYP11B1	CYP11B2	CYP17A1	CYP46A1	DAB2	DGKQ	DHRS2	DHRS9	DKK3	EDNRB	EGR1	FSHB	HSD17B10	HSD3B1	HSD3B2	LHB	REST	SCNN1B	SRD5A1	STARD3	STAT5B	TSPO	WNT4
GOBP_C4_DICARBOXYLATE_TRANSPORT	https://www.gsea-msigdb.org/gsea/msigdb/human/geneset/GOBP_C4_DICARBOXYLATE_TRANSPORT	ABAT	GFAP	LRRC8A	LRRC8C	LRRC8D	LRRC8E	NTSR1	SLC12A2	SLC13A2	SLC13A3	SLC13A5	SLC16A1	SLC1A1	SLC1A2	SLC1A3	SLC1A4	SLC1A5	SLC1A6	SLC25A10	SLC25A11	SLC25A12	SLC25A13	SLC25A18	SLC25A22	SLC3A1	SLC7A13	UCP2
GOBP_CADMIUM_ION_TRANSMEMBRANE_TRANSPORT	https://www.gsea-msigdb.org/gsea/msigdb/human/geneset/GOBP_CADMIUM_ION_TRANSMEMBRANE_TRANSPORT	SLC11A1	SLC11A2	SLC30A1	SLC39A14	SLC39A2	SLC39A8
GOBP_CALCINEURIN_MEDIATED_SIGNALING	https://www.gsea-msigdb.org/gsea/msigdb/human/geneset/GOBP_CALCINEURIN_MEDIATED_SIGNALING	ACTN3	ADGRB2	AKAP5	AKAP6	ATP2B4	C10orf71	CAMTA1	CHERP	CHP1	CHP2	CIB1	CLEC7A	DYRK2	EFHB	ERBB3	FHL2	GSK3B	HOMER2	HOMER3	IGF1	LACRT	LMCD1	MAPK7	MTOR	MYOZ1	MYOZ2	NFAT5	NFATC1	NFATC2	NFATC3	NFATC4	NR5A1	NR5A2	PLCG2	PPP3CA	PPP3CB	PPP3CC	PPP3R1	PPP3R2	PRNP	PTBP1	RCAN1	SLC8A2	SLC9A1	SPPL3	STIMATE	TBC1D10C	TNF
GOBP_CALCITONIN_FAMILY_RECEPTOR_SIGNALING_PATHWAY	https://www.gsea-msigdb.org/gsea/msigdb/human/geneset/GOBP_CALCITONIN_FAMILY_RECEPTOR_SIGNALING_PATHWAY	ADM	CALCR	CALCRL	IAPP	RAMP1	RAMP2	RAMP3	SCN11A
GOBP_CALCIUM_ACTIVATED_PHOSPHOLIPID_SCRAMBLING	https://www.gsea-msigdb.org/gsea/msigdb/human/geneset/GOBP_CALCIUM_ACTIVATED_PHOSPHOLIPID_SCRAMBLING	ANO3	ANO4	ANO6	ANO7	ANO9
GOBP_CALCIUM_DEPENDENT_CELL_CELL_ADHESION_VIA_PLASMA_MEMBRANE_CELL_ADHESION_MOLECULES	https://www.gsea-msigdb.org/gsea/msigdb/human/geneset/GOBP_CALCIUM_DEPENDENT_CELL_CELL_ADHESION_VIA_PLASMA_MEMBRANE_CELL_ADHESION_MOLECULES	AJUBA	ATP2C1	CDH1	CDH10	CDH11	CDH12	CDH13	CDH15	CDH16	CDH17	CDH18	CDH19	CDH2	CDH20	CDH22	CDH23	CDH24	CDH26	CDH3	CDH4	CDH5	CDH6	CDH7	CDH8	CDH9	CDHR3	DCHS1	DSG1	FXYD5	KIFAP3	NLGN1	PCDH12	PCDHB10	PCDHB11	PCDHB13	PCDHB14	PCDHB16	PCDHB2	PCDHB3	PCDHB4	PCDHB5	PCDHB6	PCDHB9	PCDHGB4	PCDHGC3	SELL	SELP
GOBP_CALCIUM_IMPORT_INTO_THE_MITOCHONDRION	https://www.gsea-msigdb.org/gsea/msigdb/human/geneset/GOBP_CALCIUM_IMPORT_INTO_THE_MITOCHONDRION	AFG3L2	MAIP1	MCU	MCUB	MCUR1	MICU1	MICU2	MICU3	PSEN2	SLC25A23	SMDT1	VDAC1
GOBP_CALCIUM_INDEPENDENT_CELL_CELL_ADHESION_VIA_PLASMA_MEMBRANE_CELL_ADHESION_MOLECULES	https://www.gsea-msigdb.org/gsea/msigdb/human/geneset/GOBP_CALCIUM_INDEPENDENT_CELL_CELL_ADHESION_VIA_PLASMA_MEMBRANE_CELL_ADHESION_MOLECULES	BMP2	CLDN1	CLDN10	CLDN11	CLDN12	CLDN14	CLDN15	CLDN16	CLDN17	CLDN18	CLDN19	CLDN2	CLDN20	CLDN22	CLDN23	CLDN3	CLDN4	CLDN5	CLDN6	CLDN7	CLDN8	CLDN9	CX3CL1
GOBP_CALCIUM_ION_EXPORT_ACROSS_PLASMA_MEMBRANE	https://www.gsea-msigdb.org/gsea/msigdb/human/geneset/GOBP_CALCIUM_ION_EXPORT_ACROSS_PLASMA_MEMBRANE	ATP2B1	ATP2B3	CALM1	CALM2	CALM3	MIR1-1	SLC24A4	SLC35G1	SLC8A2	YWHAE
GOBP_CALCIUM_ION_HOMEOSTASIS	https://www.gsea-msigdb.org/gsea/msigdb/human/geneset/GOBP_CALCIUM_ION_HOMEOSTASIS	ABCC6	ABL1	ADCY8	ADORA1	AFG3L2	AKAP6	ALPL	ANK2	ANKH	ANXA6	APLNR	APOE	APP	ATF4	ATG5	ATP13A1	ATP13A2	ATP13A3	ATP13A4	ATP13A5	ATP1A2	ATP1B1	ATP2A1	ATP2A2	ATP2A3	ATP2B1	ATP2B2	ATP2B3	ATP2B4	ATP2C1	ATP2C2	ATP6V1B1	ATP7B	BAK1	BAX	BCAP31	BCL2	BDKRB1	BNIP1	BNIP3	BOK	C19orf12	CACNA1C	CACNA1S	CACNB2	CACNB4	CALB1	CALB2
GOBP_CALCIUM_ION_IMPORT	https://www.gsea-msigdb.org/gsea/msigdb/human/geneset/GOBP_CALCIUM_ION_IMPORT	ACE	ATP2A1	ATP2C2	CACNA1D	CACNA1G	CACNA1H	CACNB2	CASK	CASR	CAV3	CCL2	CCL3	CDK5	CTNNB1	CXCL12	EGF	EPPIN	FCRL3	GCG	GCK	HES1	HOMER1	LGALS3	MCUR1	MICU1	MIR34A	ORAI1	PDGFB	PDGFRB	PKD2	PLN	PLPP4	SEMG1	SLC24A2	SLC24A5	SLC30A1	SLC8A1	SLN	SPHK2	SPINK1	STC1	TRIM27	TRPC4	TRPV2	TRPV3	TRPV4	UCN	WNK3
GOBP_CALCIUM_ION_IMPORT_ACROSS_PLASMA_MEMBRANE	https://www.gsea-msigdb.org/gsea/msigdb/human/geneset/GOBP_CALCIUM_ION_IMPORT_ACROSS_PLASMA_MEMBRANE	AKAP5	ATP2B4	CACNA1A	CACNA1B	CACNA1C	CACNA1D	CACNA1E	CACNA1F	CACNA1G	CACNA1H	CACNA1I	CACNA1S	CACNA2D1	CALCR	FYN	GRM6	MIR200C	MIR208A	MIR208B	MS4A1	NALF1	NALF2	P2RX1	PPP3CA	PPP3CB	PPP3CC	PPP3R1	PPP3R2	PRNP	RAMP3	SCN10A	SCN11A	SCN1A	SCN2A	SCN3A	SCN4A	SCN5A	SCN7A	SCN8A	SCN9A	SLC24A1	SLC24A2	SLC24A4	SLC8A1	SLC8A2	SLC8A3	TRPM1	TRPM2
GOBP_CALCIUM_ION_IMPORT_INTO_SARCOPLASMIC_RETICULUM	https://www.gsea-msigdb.org/gsea/msigdb/human/geneset/GOBP_CALCIUM_ION_IMPORT_INTO_SARCOPLASMIC_RETICULUM	ATP2A1	ATP2A2	MRLN	PLN	STRIT1	ZMPSTE24
GOBP_CALCIUM_ION_REGULATED_EXOCYTOSIS	https://www.gsea-msigdb.org/gsea/msigdb/human/geneset/GOBP_CALCIUM_ION_REGULATED_EXOCYTOSIS	ADRA2A	ARHGAP17	ARL8B	ATP2A2	BAIAP3	CADPS	CADPS2	CBARP	CDK5	CDK5R2	CLTRN	DOC2A	DOC2B	EQTN	GNAI2	HYAL3	KCNB1	MYH9	NLRP5	NOTCH1	PPP3CB	RAB3A	RAB3GAP1	RAP1B	RAPGEF4	REST	RIMS1	RIMS2	RIMS3	RIMS4	RPH3A	RPH3AL	SCAMP5	SCIN	SDF4	SNAP25	STX1A	STX1B	STXBP1	STXBP3	SYN2	SYT1	SYT10	SYT11	SYT12	SYT13	SYT15	SYT17
GOBP_CALCIUM_ION_REGULATED_EXOCYTOSIS_OF_NEUROTRANSMITTER	https://www.gsea-msigdb.org/gsea/msigdb/human/geneset/GOBP_CALCIUM_ION_REGULATED_EXOCYTOSIS_OF_NEUROTRANSMITTER	ATP2A2	DOC2B	RAB3A	RAB3GAP1	RIMS1	RIMS2	RIMS3	RIMS4	SNAP25	STX1B	STXBP1	SYT1	SYT11	SYT2	SYT4	SYT5	SYT7	SYT8	UNC13A	UNC13B	UNC13C
GOBP_CALCIUM_ION_TRANSMEMBRANE_IMPORT_INTO_CYTOSOL	https://www.gsea-msigdb.org/gsea/msigdb/human/geneset/GOBP_CALCIUM_ION_TRANSMEMBRANE_IMPORT_INTO_CYTOSOL	ABL1	ADCYAP1R1	ADRA1A	AKAP5	AKAP6	ANK2	APLNR	ATG5	ATP1A2	ATP2B4	BAK1	BAX	BCL2	BDKRB1	BNIP1	CACNA1A	CACNA1B	CACNA1C	CACNA1D	CACNA1E	CACNA1F	CACNA1G	CACNA1H	CACNA1I	CACNA1S	CACNA2D1	CACNB3	CALCR	CALM1	CALM2	CALM3	CAMK2D	CAPN3	CASQ1	CASQ2	CAV1	CCL19	CCL21	CCL3	CCR5	CCR7	CD19	CEMIP	CHD7	CHERP	CLIC2	CORO1A	CX3CL1
GOBP_CALCIUM_ION_TRANSMEMBRANE_TRANSPORT	https://www.gsea-msigdb.org/gsea/msigdb/human/geneset/GOBP_CALCIUM_ION_TRANSMEMBRANE_TRANSPORT	ABL1	ADCYAP1R1	ADRA1A	ADRA2A	AFG3L2	AHNAK	AKAP5	AKAP6	ANK2	ANO6	ANXA2	ANXA2P2	ANXA6	ANXA9	APLNR	ASIC1	ATG5	ATP1A2	ATP1B1	ATP2A1	ATP2A2	ATP2A3	ATP2B1	ATP2B2	ATP2B3	ATP2B4	ATP2C1	ATP2C2	BAK1	BAX	BCL2	BDKRB1	BHLHA15	BIN1	BNIP1	CABP1	CABP2	CABP4	CABP5	CACHD1	CACNA1A	CACNA1B	CACNA1C	CACNA1D	CACNA1E	CACNA1F	CACNA1G	CACNA1H
GOBP_CALCIUM_ION_TRANSMEMBRANE_TRANSPORT_VIA_HIGH_VOLTAGE_GATED_CALCIUM_CHANNEL	https://www.gsea-msigdb.org/gsea/msigdb/human/geneset/GOBP_CALCIUM_ION_TRANSMEMBRANE_TRANSPORT_VIA_HIGH_VOLTAGE_GATED_CALCIUM_CHANNEL	BIN1	CACNA1C	CACNA2D1	CACNB1	CACNB2	CACNB3	CACNG1	CACNG6	CAMK2D	G6PD	MIR1-1	MIR21	MIR328	NOS1	NOS1AP	NPPA	REM1	SESTD1	UBR3
GOBP_CALCIUM_ION_TRANSPORT	https://www.gsea-msigdb.org/gsea/msigdb/human/geneset/GOBP_CALCIUM_ION_TRANSPORT	ABL1	ACE	ADCYAP1R1	ADORA2A	ADRA1A	ADRA2A	AFG3L2	AHNAK	AKAP5	AKAP6	ANK2	ANO6	ANXA2	ANXA2P2	ANXA6	ANXA9	APLNR	ASIC1	ATG5	ATP1A2	ATP1B1	ATP2A1	ATP2A2	ATP2A3	ATP2B1	ATP2B2	ATP2B3	ATP2B4	ATP2C1	ATP2C2	BAK1	BAX	BCL2	BDKRB1	BEST1	BHLHA15	BIN1	BNIP1	BSPRY	CABP1	CABP2	CABP4	CABP5	CACHD1	CACNA1A	CACNA1B	CACNA1C	CACNA1D
GOBP_CALCIUM_ION_TRANSPORT_INTO_CYTOSOL	https://www.gsea-msigdb.org/gsea/msigdb/human/geneset/GOBP_CALCIUM_ION_TRANSPORT_INTO_CYTOSOL	ADCYAP1R1	ADRA1A	BAK1	BAX	BCL2	CACNA1C	CACNA2D1	CACNB3	CAV1	EPO	GRIN1	JPH1	JPH2	JPH3	JPH4	LHCGR	NOS1	P2RX2	P2RX3	P2RX4	P2RX5	P2RX7	PLA2G1B	PML	RYR2	SLC8A1	TMBIM6	TRPC3
GOBP_CALCIUM_MEDIATED_SIGNALING	https://www.gsea-msigdb.org/gsea/msigdb/human/geneset/GOBP_CALCIUM_MEDIATED_SIGNALING	ACKR2	ACKR3	ACKR4	ACTN3	ADA	ADGRB2	ADGRL1	AGTR1	AKAP5	AKAP6	ANK2	ATP1A2	ATP1B1	ATP2A2	ATP2B4	AVPR1A	AZU1	BCAP31	BHLHA15	BST1	BTK	C10orf71	CACNA1C	CALM1	CALM2	CALM3	CAMK2D	CAMKK2	CAMTA1	CASQ1	CASQ2	CCL20	CCL3	CCL4	CCR1	CCR10	CCR2	CCR3	CCR4	CCR5	CCR6	CCR7	CCR8	CCR9	CCRL2	CD22	CD3E	CD4
GOBP_CALCIUM_MEDIATED_SIGNALING_USING_INTRACELLULAR_CALCIUM_SOURCE	https://www.gsea-msigdb.org/gsea/msigdb/human/geneset/GOBP_CALCIUM_MEDIATED_SIGNALING_USING_INTRACELLULAR_CALCIUM_SOURCE	ADGRL1	AZU1	BCAP31	CCL20	DEFB1	DMTN	FIS1	FKBP1B	GPR143	GRM5	HOMER2	KDR	PRKACA	PRNP	PTGFR	PTPRC	PTPRJ	RYR2	SELP	STIMATE	TRPM2	VCAM1
GOBP_CALMODULIN_DEPENDENT_KINASE_SIGNALING_PATHWAY	https://www.gsea-msigdb.org/gsea/msigdb/human/geneset/GOBP_CALMODULIN_DEPENDENT_KINASE_SIGNALING_PATHWAY	CAMKK2	HTT	IRGM	KCNJ11	KCNJ8	LRRK2	PCP4	PRKAA1	TPRG1L	TREM2	ZMPSTE24
GOBP_CAMERA_TYPE_EYE_MORPHOGENESIS	https://www.gsea-msigdb.org/gsea/msigdb/human/geneset/GOBP_CAMERA_TYPE_EYE_MORPHOGENESIS	ABI2	AHI1	ALDH1A3	AQP1	AQP5	ATF4	ATP8A2	BAK1	BAX	BBS4	BCAR3	BMP4	BMP7	C12orf57	CABP4	CALB1	CDON	CITED2	CNTF	COL8A1	COL8A2	CRB1	CRB2	CRYGB	CTNNB1	DIO3	DLL1	DSCAM	EPHA2	EPHB1	EPHB2	FAT1	FAT3	FJX1	FOXE3	FOXF2	FOXN4	FRS2	FZD5	GDF11	GLI3	GNAT1	GNAT2	HCN1	HIF1A	HIPK1	HIPK2	HMGN1
GOBP_CAMERA_TYPE_EYE_PHOTORECEPTOR_CELL_DIFFERENTIATION	https://www.gsea-msigdb.org/gsea/msigdb/human/geneset/GOBP_CAMERA_TYPE_EYE_PHOTORECEPTOR_CELL_DIFFERENTIATION	BBS4	CABP4	CNTF	CRB2	DIO3	DSCAM	GNAT1	GNAT2	HCN1	IHH	NAGLU	NDP	NOTCH1	NRL	NTRK2	PDE6C	PROM1	ROM1	RORB	RP1	RPGRIP1	RPGRIP1L	SDK2	SOX8	SOX9	STAT3	THRB	THY1	TTC8	USH1C
GOBP_CAMKK_AMPK_SIGNALING_CASCADE	https://www.gsea-msigdb.org/gsea/msigdb/human/geneset/GOBP_CAMKK_AMPK_SIGNALING_CASCADE	CAMKK2	HTT	IRGM	KCNJ11	KCNJ8	LRRK2	PRKAA1	TREM2	ZMPSTE24
GOBP_CAMP_BIOSYNTHETIC_PROCESS	https://www.gsea-msigdb.org/gsea/msigdb/human/geneset/GOBP_CAMP_BIOSYNTHETIC_PROCESS	ADCY1	ADCY10	ADCY2	ADCY3	ADCY4	ADCY5	ADCY6	ADCY7	ADCY8	ADCY9
GOBP_CAMP_CATABOLIC_PROCESS	https://www.gsea-msigdb.org/gsea/msigdb/human/geneset/GOBP_CAMP_CATABOLIC_PROCESS	PDE10A	PDE4A	PDE4B	PDE4C	PDE4D	PDE7A	PDE7B	PDE8A	PDE8B
GOBP_CAMP_MEDIATED_SIGNALING	https://www.gsea-msigdb.org/gsea/msigdb/human/geneset/GOBP_CAMP_MEDIATED_SIGNALING	ADCY1	ADCY2	ADCYAP1	ADCYAP1R1	ADGRG6	ADM	AHR	AKAP6	APLNR	ATF1	CAP1	CAP2	CDC34	CGAS	CREB1	DEFB1	DGKQ	EPHA5	FFAR4	GAL	GHRHR	GIP	GIPR	GLP1R	GNAI1	GPR3	GPR61	GPR62	INSL3	KSR1	LPAR1	MAPK7	MGRN1	OPRL1	OR51E2	PDE11A	PDE2A	PDE3A	PDE3B	PDE4D	PDE7A	PDE7B	PEX5L	POMC	RAPGEF2	RAPGEF3	RASD2	RXFP2
GOBP_CAMP_METABOLIC_PROCESS	https://www.gsea-msigdb.org/gsea/msigdb/human/geneset/GOBP_CAMP_METABOLIC_PROCESS	ADCY1	ADCY10	ADCY2	ADCY3	ADCY4	ADCY5	ADCY6	ADCY7	ADCY8	ADCY9	CACNB4	EPHA2	PDE10A	PDE4A	PDE4B	PDE4C	PDE4D	PDE7A	PDE7B	PDE8A	PDE8B	PTH	PTHLH
GOBP_CANNABINOID_SIGNALING_PATHWAY	https://www.gsea-msigdb.org/gsea/msigdb/human/geneset/GOBP_CANNABINOID_SIGNALING_PATHWAY	ABHD6	ADGRF1	ALOX15B	CAMK2A	CNR1	CNR2	DAGLA	GPR55	MGLL
GOBP_CANONICAL_NF_KAPPAB_SIGNAL_TRANSDUCTION	https://www.gsea-msigdb.org/gsea/msigdb/human/geneset/GOBP_CANONICAL_NF_KAPPAB_SIGNAL_TRANSDUCTION	ABL1	ADIPOQ	AJUBA	AKAP13	AKT1	ALPK1	ANGPT1	ANKRD17	APOL3	ARRB2	ASH1L	ATP2C1	AVPR2	AZI2	BCL10	BCL3	BIRC2	BIRC3	BRD4	BST2	BTK	BTRC	C18orf32	CACTIN	CANT1	CAPN3	CARD11	CARD16	CARD19	CARD8	CARD9	CASP1	CASP10	CASP8	CC2D1A	CCDC22	CCL19	CCL21	CCR7	CD36	CD4	CD40	CD74	CFLAR	CHUK	CLEC4D	CLEC6A	CLEC7A
GOBP_CANONICAL_WNT_SIGNALING_PATHWAY	https://www.gsea-msigdb.org/gsea/msigdb/human/geneset/GOBP_CANONICAL_WNT_SIGNALING_PATHWAY	ADGRA2	ADNP	AMER1	AMER2	AMER3	AMFR	ANKRD6	APC	APC2	APOE	ASPM	ATP6AP2	AXIN1	AXIN2	BAMBI	BCL9	BCL9L	BICC1	BIRC8	BMAL1	BMP2	BTRC	CAPRIN2	CAV1	CBY1	CCAR2	CCDC88C	CCNY	CCNYL1	CCNYL2	CCNYL3	CDH2	CDH3	CDK14	CHD8	COL1A1	CSNK1A1	CSNK1A1L	CSNK1D	CSNK1E	CSNK1G1	CSNK1G2	CSNK1G3	CTDNEP1	CTHRC1	CTNNB1	CTNNBIP1	CTNND1
GOBP_CANONICAL_WNT_SIGNALING_PATHWAY_INVOLVED_IN_CARDIAC_MUSCLE_CELL_FATE_COMMITMENT	https://www.gsea-msigdb.org/gsea/msigdb/human/geneset/GOBP_CANONICAL_WNT_SIGNALING_PATHWAY_INVOLVED_IN_CARDIAC_MUSCLE_CELL_FATE_COMMITMENT	DKK1	MIR19B1	RBPJ	WNT3A	WNT8A
GOBP_CANONICAL_WNT_SIGNALING_PATHWAY_INVOLVED_IN_HEART_DEVELOPMENT	https://www.gsea-msigdb.org/gsea/msigdb/human/geneset/GOBP_CANONICAL_WNT_SIGNALING_PATHWAY_INVOLVED_IN_HEART_DEVELOPMENT	CTNNB1	DKK1	MIR19B1	RBPJ	WNT3A	WNT8A
GOBP_CANONICAL_WNT_SIGNALING_PATHWAY_INVOLVED_IN_OSTEOBLAST_DIFFERENTIATION	https://www.gsea-msigdb.org/gsea/msigdb/human/geneset/GOBP_CANONICAL_WNT_SIGNALING_PATHWAY_INVOLVED_IN_OSTEOBLAST_DIFFERENTIATION	CTNNB1	FZD1	GSK3B	MIR29B1	MIR346	TNN	WNT3
GOBP_CANONICAL_WNT_SIGNALING_PATHWAY_INVOLVED_IN_REGULATION_OF_CELL_PROLIFERATION	https://www.gsea-msigdb.org/gsea/msigdb/human/geneset/GOBP_CANONICAL_WNT_SIGNALING_PATHWAY_INVOLVED_IN_REGULATION_OF_CELL_PROLIFERATION	CTNNB1	DVL2	LRP6	SFRP1	WNT3	WNT3A
GOBP_CAP_DEPENDENT_TRANSLATIONAL_INITIATION	https://www.gsea-msigdb.org/gsea/msigdb/human/geneset/GOBP_CAP_DEPENDENT_TRANSLATIONAL_INITIATION	EIF3D	EIF4G1	MIF4GD	NCBP1	NCBP2	NCK1	SLBP
GOBP_CARBOHYDRATE_BIOSYNTHETIC_PROCESS	https://www.gsea-msigdb.org/gsea/msigdb/human/geneset/GOBP_CARBOHYDRATE_BIOSYNTHETIC_PROCESS	ACADM	ADCYAP1R1	ADIPOQ	AGL	AKR1A1	AKR1B1	AKT1	AKT2	ALDOB	ALDOC	AP2A1	ARPP19	ATF3	ATF4	AVPR1B	B3GALNT1	B3GALT1	B3GALT2	B3GALT4	B3GALT5	B3GAT2	B4GALNT2	B4GALT1	C1QTNF12	C1QTNF3	CD244	CHST10	CHST11	CHST12	CHST13	CHST14	CHST15	CHST8	CHST9	CLK2	CLTC	CRTC2	CRY1	CSGALNACT1	CSGALNACT2	DDB1	DGKQ	DSE	DSEL	DYRK2	EGF	ENO1	ENO2
GOBP_CARBOHYDRATE_CATABOLIC_PROCESS	https://www.gsea-msigdb.org/gsea/msigdb/human/geneset/GOBP_CARBOHYDRATE_CATABOLIC_PROCESS	ACTN3	ADCY10	ADPGK	AGL	ALDOA	ALDOB	ALDOC	AMY2A	APP	ARL2	ARNT	BAD	BPGM	CBFA2T3	CHIA	CHIT1	CTBS	DDIT4	DERA	DHDH	DHTKD1	EIF6	ENO1	ENO2	ENO3	ENO4	ENOSF1	EP300	FBP1	FLCN	FOXK1	FOXK2	FUT1	FUT10	FUT2	FUT4	FUT5	FUT6	FUT7	FUT8	FUT9	G6PC1	GAA	GABARAPL1	GALE	GALK1	GALM	GALT
GOBP_CARBOHYDRATE_DERIVATIVE_BIOSYNTHETIC_PROCESS	https://www.gsea-msigdb.org/gsea/msigdb/human/geneset/GOBP_CARBOHYDRATE_DERIVATIVE_BIOSYNTHETIC_PROCESS	A3GALT2	A4GALT	A4GNT	AATF	ABCA2	ABCA7	ABCC5	ACACA	ACACB	ACAT1	ACER2	ACLY	ACOT7	ACOT8	ACSBG1	ACSBG2	ACSF3	ACSL1	ACSL3	ACSL4	ACSL5	ACSL6	ACSS1	ACSS2	ADA	ADA2	ADAL	ADCY1	ADCY10	ADCY2	ADCY3	ADCY4	ADCY5	ADCY6	ADCY7	ADCY8	ADCY9	ADK	ADSL	ADSS1	ADSS2	AGO2	AK1	AK2	AK3	AK4	AK5	AKR1A1
GOBP_CARBOHYDRATE_DERIVATIVE_CATABOLIC_PROCESS	https://www.gsea-msigdb.org/gsea/msigdb/human/geneset/GOBP_CARBOHYDRATE_DERIVATIVE_CATABOLIC_PROCESS	ABCD1	ABHD10	ACAT1	ACOT7	ADA	ADA2	ADAL	ADAMTS12	AICDA	ALDH1A1	AMDHD2	AMPD3	AOAH	APOBEC1	APOBEC2	APOBEC3A	APOBEC3B	APOBEC3C	APOBEC3D	APOBEC3F	APOBEC3G	APOBEC3H	BPGM	BTK	CD44	CDA	CDADC1	CELA1	CEMIP	CEMIP2	CHI3L1	CHI3L2	CHIA	CHIT1	CST3	CTBS	CTSL	DCTPP1	DERA	DPYD	DPYS	DUT	EDEM1	EDEM2	EDEM3	ENPP4	ENSG00000276759	ENTPD4
GOBP_CARBOHYDRATE_DERIVATIVE_METABOLIC_PROCESS	https://www.gsea-msigdb.org/gsea/msigdb/human/geneset/GOBP_CARBOHYDRATE_DERIVATIVE_METABOLIC_PROCESS	A3GALT2	A4GALT	A4GNT	AADAT	AASS	AATF	ABCA2	ABCA7	ABCC5	ABCC6	ABCD1	ABHD10	ABHD14B	ABHD6	ACACA	ACACB	ACAT1	ACER2	ACLY	ACOT1	ACOT11	ACOT12	ACOT2	ACOT4	ACOT6	ACOT7	ACOT8	ACOT9	ACP3	ACP6	ACSBG1	ACSBG2	ACSF2	ACSF3	ACSL1	ACSL3	ACSL4	ACSL5	ACSL6	ACSM1	ACSM2A	ACSM2B	ACSM3	ACSM4	ACSM5	ACSM6	ACSS1	ACSS2
GOBP_CARBOHYDRATE_DERIVATIVE_TRANSPORT	https://www.gsea-msigdb.org/gsea/msigdb/human/geneset/GOBP_CARBOHYDRATE_DERIVATIVE_TRANSPORT	ABCC3	ABCC4	ABCC5	ABCC6	ABCD1	ABCG1	ADCY10	ADORA1	ANKH	CALHM1	CALHM3	CD47	CLN3	CPTP	CR1	G6PC1	G6PC3	GJB1	GLTP	LBP	LRRC8A	LRRC8C	LRRC8D	LRRC8E	MFSD2A	NPC2	PLA2G10	PLEKHA8	PLTP	PSAP	RALBP1	RFT1	RSC1A1	SCARB1	SLC10A7	SLC15A2	SLC15A3	SLC15A4	SLC17A3	SLC17A9	SLC19A1	SLC25A16	SLC25A17	SLC25A19	SLC25A23	SLC25A24	SLC25A25	SLC25A26
GOBP_CARBOHYDRATE_HOMEOSTASIS	https://www.gsea-msigdb.org/gsea/msigdb/human/geneset/GOBP_CARBOHYDRATE_HOMEOSTASIS	ABCA12	ABCC8	ACE	ACSM2A	ADCY5	ADCY8	ADGRF5	ADIPOQ	ADIPOR1	ADIPOR2	ADISSP	ADRA2A	AGER	AKT1	ALOX5	ANO1	APPL2	ASPSCR1	BACE2	BAD	BAIAP3	BECN2	BGLAP	BHLHA15	BRSK2	C1QTNF12	C2CD2L	CARTPT	CASR	CAV3	CCDC186	CCN4	CDK16	CEBPA	CFTR	CLTRN	CMA1	CMKLR2	CNR1	CPB2	CRTC2	CRY1	CRY2	CSMD1	CSRP3	CYB5R4	CYP11B1	CYP7A1
GOBP_CARBOHYDRATE_IMPORT_ACROSS_PLASMA_MEMBRANE	https://www.gsea-msigdb.org/gsea/msigdb/human/geneset/GOBP_CARBOHYDRATE_IMPORT_ACROSS_PLASMA_MEMBRANE	SLC2A1	SLC2A10	SLC2A3	SLC2A5	SLC5A1	SLC5A2
GOBP_CARBOHYDRATE_MEDIATED_SIGNALING	https://www.gsea-msigdb.org/gsea/msigdb/human/geneset/GOBP_CARBOHYDRATE_MEDIATED_SIGNALING	ADCY8	AGER	CLEC7A	COLEC12	MLXIPL	NKX6-1	PDX1	PIH1D1	SMARCA4	SMARCB1	UBTF
GOBP_CARBOHYDRATE_METABOLIC_PROCESS	https://www.gsea-msigdb.org/gsea/msigdb/human/geneset/GOBP_CARBOHYDRATE_METABOLIC_PROCESS	A3GALT2	A4GNT	ABO	ACACB	ACADM	ACTN3	ADCY10	ADCYAP1R1	ADIPOQ	ADIPOR1	ADPGK	ADRB3	AGL	AKR1A1	AKR1B1	AKR7A2	AKT1	AKT2	ALDH1B1	ALDH2	ALDOA	ALDOB	ALDOC	AMDHD2	AMY1A	AMY1B	AMY1C	AMY2A	AMY2B	ANGPTL3	AP2A1	APOD	APP	ARL2	ARNT	ARPP19	ATF3	ATF4	AVPR1B	B3GALNT1	B3GALT1	B3GALT2	B3GALT4	B3GALT5	B3GAT1	B3GAT2	B3GAT3	B3GLCT
GOBP_CARBOHYDRATE_PHOSPHORYLATION	https://www.gsea-msigdb.org/gsea/msigdb/human/geneset/GOBP_CARBOHYDRATE_PHOSPHORYLATION	FCSK	FGGY	GALK1	GALK2	GCK	GNE	GNPTAB	GNPTG	HK1	HK2	HK3	HKDC1	KHK	NAGK	PFKFB1	PFKFB2	PFKFB3	PFKFB4	PFKM	POMK	RBKS	TKFC	XYLB
GOBP_CARBOHYDRATE_TRANSMEMBRANE_TRANSPORT	https://www.gsea-msigdb.org/gsea/msigdb/human/geneset/GOBP_CARBOHYDRATE_TRANSMEMBRANE_TRANSPORT	ABCB11	ACE	ADIPOQ	AKT1	AKT2	APPL1	APPL2	AQP1	AQP10	AQP11	AQP2	AQP3	AQP7	AQP7B	AQP7P3	AQP9	ARPP19	ASPSCR1	BRAF	C1QTNF12	C2CD5	C3	CAPN10	CLIP3	CLTCL1	CREBL2	CTNS	DHRS7C	DRD1	EDN1	EDNRA	ENPP1	ERFE	FABP5	FFAR4	FGF19	FGF21	GH1	GIP	GPC3	GRB10	GSK3A	HK2	HNF1A	IGF1	IL1B	INPP5K	INS
GOBP_CARBOHYDRATE_TRANSPORT	https://www.gsea-msigdb.org/gsea/msigdb/human/geneset/GOBP_CARBOHYDRATE_TRANSPORT	ABCB11	ACE	ADIPOQ	AKT1	AKT2	APPL1	APPL2	AQP1	AQP10	AQP11	AQP2	AQP3	AQP7	AQP7B	AQP7P3	AQP9	ARPP19	ASPSCR1	BRAF	C1QTNF12	C2CD5	C3	CAPN10	CLIP3	CLTCL1	CREBL2	CTNS	DHRS7C	DRD1	EDN1	EDNRA	ENPP1	ERFE	EZR	FABP5	FFAR4	FGF19	FGF21	GH1	GIP	GPC3	GRB10	GSK3A	HK2	HNF1A	IGF1	IL1B	INPP5K
GOBP_CARBON_CATABOLITE_REGULATION_OF_TRANSCRIPTION	https://www.gsea-msigdb.org/gsea/msigdb/human/geneset/GOBP_CARBON_CATABOLITE_REGULATION_OF_TRANSCRIPTION	FOXA2	KAT2B	MLXIPL	NCOA1	OGT	SRF	USF1	USF2
GOBP_CARBON_DIOXIDE_TRANSPORT	https://www.gsea-msigdb.org/gsea/msigdb/human/geneset/GOBP_CARBON_DIOXIDE_TRANSPORT	AQP1	AQP5	AQP6	CA2	HBA1	HBA2	HBB	HBD	HBE1	HBG1	HBG2	HBZ	RHAG	RHBG	RHCG
GOBP_CARDIAC_ATRIUM_DEVELOPMENT	https://www.gsea-msigdb.org/gsea/msigdb/human/geneset/GOBP_CARDIAC_ATRIUM_DEVELOPMENT	ACVR1	ANK2	BMP10	BMP2	BMPR2	CCN1	DAND5	DLL4	ENG	GATA4	GJA5	HEG1	HEY2	IGF1R	ISL1	MDM2	MDM4	MESP1	MYH6	NKX2-5	NOG	NOTCH1	NOTCH2	NPHP3	NSD2	PROX1	SHOX2	SMO	SOS1	SOX4	TBX20	TBX5	TGFB2	WNT11	WNT2	WNT5A	ZFPM1
GOBP_CARDIAC_ATRIUM_MORPHOGENESIS	https://www.gsea-msigdb.org/gsea/msigdb/human/geneset/GOBP_CARDIAC_ATRIUM_MORPHOGENESIS	ACVR1	BMP10	BMP2	BMPR2	CCN1	DLL4	ENG	GATA4	HEG1	HEY2	ISL1	MESP1	MYH6	NKX2-5	NOG	NOTCH1	NOTCH2	NSD2	PROX1	SHOX2	SMO	SOS1	SOX4	TBX20	TBX5	TGFB2	WNT2	WNT5A	ZFPM1
GOBP_CARDIAC_CELL_DEVELOPMENT	https://www.gsea-msigdb.org/gsea/msigdb/human/geneset/GOBP_CARDIAC_CELL_DEVELOPMENT	ACTC1	ACTN2	ADPRHL1	ADRA1A	AKAP6	ALPK2	ALPK3	ASB2	ATG5	BMP10	BMP4	BMPR1A	BVES	CAV3	CDK1	CSRP3	CTDP1	CXADR	EDN1	FHL2	FHOD3	FOXP1	G6PD	GATA4	GSK3A	HEY2	HNRNPU	IGF1	INHBA	ISL1	JAG1	LARGE1	LMNA	LRRC10	LRRC27	MAML1	MAP2K4	MEF2A	MEIS1	MIR195	MIR199A1	MIR199B	MIR19A	MIR19B1	MIR208A	MIR21	MIR23A	MIR24-1
GOBP_CARDIAC_CELL_FATE_COMMITMENT	https://www.gsea-msigdb.org/gsea/msigdb/human/geneset/GOBP_CARDIAC_CELL_FATE_COMMITMENT	ACVR1	DKK1	ISL1	ITGB1	MESP1	MIR19B1	NKX2-5	RBPJ	SOX17	TBX18	TBX3	TBX5	TENM4	WNT3A	WNT8A	WT1
GOBP_CARDIAC_CHAMBER_DEVELOPMENT	https://www.gsea-msigdb.org/gsea/msigdb/human/geneset/GOBP_CARDIAC_CHAMBER_DEVELOPMENT	ACVR1	ADAMTS1	ADAMTS6	ADGRG6	ADPRHL1	ANK2	AP2B1	APLNR	BMP10	BMP2	BMP4	BMP5	BMP7	BMPR1A	BMPR2	CAV3	CCN1	CHD7	CITED2	CNTRL	COL11A1	CPE	CRELD1	DAND5	DCTN5	DHRS3	DLL4	DNAH11	DSP	EDNRA	EGLN1	ENG	FGF8	FGFR2	FGFRL1	FHL2	FKBP1A	FOXC1	FOXC2	FOXF1	FOXH1	FRS2	FZD1	FZD2	GATA3	GATA4	GATA6	GJA5
GOBP_CARDIAC_CHAMBER_FORMATION	https://www.gsea-msigdb.org/gsea/msigdb/human/geneset/GOBP_CARDIAC_CHAMBER_FORMATION	BMP2	EDNRA	HAND1	HAND2	MEF2C	MESP1	NKX2-5	NOTCH1	SMARCD3	TBX2	TBX20	TBX5
GOBP_CARDIAC_CHAMBER_MORPHOGENESIS	https://www.gsea-msigdb.org/gsea/msigdb/human/geneset/GOBP_CARDIAC_CHAMBER_MORPHOGENESIS	ACVR1	ADAMTS1	ADGRG6	ADPRHL1	APLNR	BMP10	BMP2	BMP4	BMP5	BMP7	BMPR1A	BMPR2	CAV3	CCN1	CHD7	CITED2	COL11A1	CPE	DHRS3	DLL4	DNAH11	DSP	EDNRA	EGLN1	ENG	FGF8	FGFR2	FGFRL1	FHL2	FKBP1A	FOXC1	FOXC2	FOXF1	FOXH1	FZD1	FZD2	GATA3	GATA4	GATA6	GRHL2	GSK3A	HAND1	HAND2	HEG1	HES1	HEY1	HEY2	HEYL
GOBP_CARDIAC_CONDUCTION	https://www.gsea-msigdb.org/gsea/msigdb/human/geneset/GOBP_CARDIAC_CONDUCTION	ABCC9	ACE2	AGT	AKAP9	ANK2	ATP1A1	ATP1A2	ATP1A3	ATP1B1	ATP1B2	ATP2A1	ATP2A2	ATP2A3	ATP2B1	ATP2B2	ATP2B3	ATP2B4	BIN1	CACNA1C	CACNA1D	CACNA1G	CACNA2D1	CACNB2	CALM1	CALM2	CALM3	CAMK2D	CASQ2	CAV1	CORIN	CTNNA3	CXADR	DSC2	DSG2	DSP	EHD3	FKBP1B	FLNA	GJA1	GJA5	GJC1	GJC3	GJD3	HCN4	HRC	IRX3	ISL1	JUP
GOBP_CARDIAC_CONDUCTION_SYSTEM_DEVELOPMENT	https://www.gsea-msigdb.org/gsea/msigdb/human/geneset/GOBP_CARDIAC_CONDUCTION_SYSTEM_DEVELOPMENT	BMP4	BMPR1A	BVES	CACNA1G	CDC42	DSG2	GATA4	GATA6	GJA1	GJA5	GJB6	HCN4	HEY1	HEY2	HOPX	ID2	IRX3	ISL1	KCNJ8	MAML1	MESP1	MSC	MSX1	MSX2	NKX2-5	NOTCH1	NOTCH2	NPPA	NPPB	SCN5A	SHOX2	SMAD1	SMAD4	SMAD5	TBX18	TBX3	TBX5
GOBP_CARDIAC_EPITHELIAL_TO_MESENCHYMAL_TRANSITION	https://www.gsea-msigdb.org/gsea/msigdb/human/geneset/GOBP_CARDIAC_EPITHELIAL_TO_MESENCHYMAL_TRANSITION	ACVR1	ACVRL1	ADAM15	BMP2	BMP4	EFNA1	EMP2	ENG	FGF8	HAS2	HEY1	HEY2	HEYL	JAG1	MIR21	MSX1	MSX2	NOG	NOTCH1	OLFM1	PDCD4	RBPJ	RTN4	SMAD4	SNAI1	SNAI2	SPRY1	TBX3	TGFB1	TGFB2	TGFB3	TGFBR1	TGFBR2	TGFBR3	TMEM100	TWIST1	WNT16	WNT2
GOBP_CARDIAC_FIBROBLAST_CELL_DIFFERENTIATION	https://www.gsea-msigdb.org/gsea/msigdb/human/geneset/GOBP_CARDIAC_FIBROBLAST_CELL_DIFFERENTIATION	INHBA	MIR21	PDCD4	SPRY1	TGFBR3
GOBP_CARDIAC_LEFT_VENTRICLE_MORPHOGENESIS	https://www.gsea-msigdb.org/gsea/msigdb/human/geneset/GOBP_CARDIAC_LEFT_VENTRICLE_MORPHOGENESIS	CPE	EDNRA	FOXF1	GSK3A	HAND1	HEY2	NAGLU	NOTCH1	NPY2R	NPY5R	RBPJ	RYR2	SFRP2	SMAD4	TBX5	TGFBR2
GOBP_CARDIAC_MUSCLE_CELL_ACTION_POTENTIAL	https://www.gsea-msigdb.org/gsea/msigdb/human/geneset/GOBP_CARDIAC_MUSCLE_CELL_ACTION_POTENTIAL	AKAP9	ANK2	ANK3	ATP1A1	ATP1A2	ATP1B1	ATP2A2	BIN1	CACNA1C	CACNA1D	CACNA1G	CACNA2D1	CACNB2	CALM1	CALM3	CAMK2D	CAV1	CAV3	CTNNA3	CXADR	DLG1	DMD	DSC2	DSG2	DSP	FGF12	FGF13	FLNA	GJA1	GJA5	GJC1	GPD1L	HCN2	HCN4	JUP	KCNA5	KCND3	KCNE1	KCNE2	KCNE3	KCNE4	KCNE5	KCNH2	KCNIP2	KCNJ2	KCNJ3	KCNJ5	KCNJ8
GOBP_CARDIAC_MUSCLE_CELL_ACTION_POTENTIAL_INVOLVED_IN_CONTRACTION	https://www.gsea-msigdb.org/gsea/msigdb/human/geneset/GOBP_CARDIAC_MUSCLE_CELL_ACTION_POTENTIAL_INVOLVED_IN_CONTRACTION	ANK2	ATP1A1	BIN1	CACNA1C	CACNA1D	CACNA1G	CACNA2D1	CACNB2	CAV1	CAV3	CTNNA3	DLG1	DSC2	DSG2	DSP	FGF12	FLNA	GJA1	GJA5	GJC1	GPD1L	JUP	KCNA5	KCND3	KCNE1	KCNE2	KCNE3	KCNE4	KCNE5	KCNH2	KCNJ2	KCNJ3	KCNJ5	KCNJ8	KCNN2	KCNQ1	MIR1-1	MIR133A1	MIR328	NEDD4L	NOS1AP	NUP155	PKP2	RNF207	RYR2	SCN1A	SCN1B	SCN2B
GOBP_CARDIAC_MUSCLE_CELL_CARDIAC_MUSCLE_CELL_ADHESION	https://www.gsea-msigdb.org/gsea/msigdb/human/geneset/GOBP_CARDIAC_MUSCLE_CELL_CARDIAC_MUSCLE_CELL_ADHESION	CTNNA3	CXADR	DSC2	DSG2	DSP	JUP	PKP2
GOBP_CARDIAC_MUSCLE_CELL_CONTRACTION	https://www.gsea-msigdb.org/gsea/msigdb/human/geneset/GOBP_CARDIAC_MUSCLE_CELL_CONTRACTION	ABCC9	ADCY10	ADORA1	AKAP9	ANK2	ATP1A1	ATP1A2	ATP2A1	ATP2A2	BIN1	CACNA1C	CACNA1D	CACNA1G	CACNA2D1	CACNB2	CAMK2D	CAV1	CAV3	CTNNA3	DLG1	DSC2	DSG2	DSP	FGF12	FGF13	FLNA	GATA4	GJA1	GJA5	GJC1	GPD1L	GSN	HCN4	JUP	KCNA5	KCND3	KCNE1	KCNE2	KCNE3	KCNE4	KCNE5	KCNH2	KCNJ2	KCNJ3	KCNJ5	KCNJ8	KCNN2	KCNQ1
GOBP_CARDIAC_MUSCLE_CELL_DIFFERENTIATION	https://www.gsea-msigdb.org/gsea/msigdb/human/geneset/GOBP_CARDIAC_MUSCLE_CELL_DIFFERENTIATION	ACADM	ACTC1	ACTN2	ACVR1	ADPRHL1	ADRA1A	AKAP13	AKAP6	ALPK2	ALPK3	ARRB2	ASB2	ATG5	BMP10	BMP2	BMP4	BMPR1A	BVES	CALR	CAV3	CBY1	CDK1	CSRP3	CTDP1	CXADR	DKK1	DLL1	EDN1	EFNB2	FHL2	FHOD3	FOXP1	FRS2	FZD7	G6PD	GATA4	GATA6	GREM1	GSK3A	HDAC3	HEY2	HNRNPU	IFT20	IGF1	IRX3	ISL1	ITGB1	KAT2A
GOBP_CARDIAC_MUSCLE_CELL_FATE_COMMITMENT	https://www.gsea-msigdb.org/gsea/msigdb/human/geneset/GOBP_CARDIAC_MUSCLE_CELL_FATE_COMMITMENT	ACVR1	DKK1	MIR19B1	NKX2-5	RBPJ	TBX18	TBX3	TBX5	WNT3A	WNT8A	WT1
GOBP_CARDIAC_MUSCLE_CELL_MEMBRANE_REPOLARIZATION	https://www.gsea-msigdb.org/gsea/msigdb/human/geneset/GOBP_CARDIAC_MUSCLE_CELL_MEMBRANE_REPOLARIZATION	AKAP9	ANK2	ATP1A1	ATP1B1	CACNA1D	CACNA2D1	CAV3	FLNA	GJA5	KCNA5	KCND3	KCNE1	KCNE2	KCNE3	KCNE4	KCNE5	KCNH2	KCNH6	KCNIP2	KCNJ2	KCNJ3	KCNJ5	KCNJ8	KCNN2	KCNQ1	MIR1-1	MIR133A1	MIR328	NOS1AP	NPPA	RNF207	SCN1B	SCN2B	SCN4B	SCN5A	SNTA1	WDR1	YWHAE	ZMPSTE24
GOBP_CARDIAC_MUSCLE_CELL_MYOBLAST_DIFFERENTIATION	https://www.gsea-msigdb.org/gsea/msigdb/human/geneset/GOBP_CARDIAC_MUSCLE_CELL_MYOBLAST_DIFFERENTIATION	GREM1	ISL1	ITGB1	MYOCD	NOTCH1	NRG1	PRICKLE1	RBPJ	REST	SRF	TBX2	TBXT
GOBP_CARDIAC_MUSCLE_CELL_PROLIFERATION	https://www.gsea-msigdb.org/gsea/msigdb/human/geneset/GOBP_CARDIAC_MUSCLE_CELL_PROLIFERATION	ABL1	ARID2	BMP10	BMPR1A	CDK1	CITED2	DIPK2A	ERBB4	FES	FGF2	FGF20	FGF9	FGFR2	FOXC1	FOXC2	GATA6	GLI1	HEY2	JARID2	KCNK2	MAPK11	MAPK14	MEF2C	MIR1-1	MIR17HG	MIR199A1	MIR199B	MIR19B1	MIR200B	MIR204	MIR222	MIR509-1	MIR548C	MIR590	MIR873	NDRG4	NKX2-5	NOG	NOTCH1	PIM1	PRKAR1A	RBP4	RBPJ	RUNX1	SAV1	SKI	SMAD1	TBX2
GOBP_CARDIAC_MUSCLE_CONTRACTION	https://www.gsea-msigdb.org/gsea/msigdb/human/geneset/GOBP_CARDIAC_MUSCLE_CONTRACTION	ABCC9	ACE2	ADCY10	ADORA1	ADRA1A	ADRA1B	AKAP9	ANK2	ASB3	ATP1A1	ATP1A2	ATP1B1	ATP2A1	ATP2A2	BIN1	BMP10	CACNA1C	CACNA1D	CACNA1G	CACNA2D1	CACNB2	CALM1	CALM2	CALM3	CAMK2D	CASQ2	CAV1	CAV3	CHGA	CLIC2	CSRP3	CTNNA3	CXCR4	DLG1	DMD	DSC2	DSG2	DSP	EHD3	FGF12	FGF13	FKBP1B	FLNA	GAA	GATA4	GJA1	GJA5	GJC1
GOBP_CARDIAC_MUSCLE_MYOBLAST_PROLIFERATION	https://www.gsea-msigdb.org/gsea/msigdb/human/geneset/GOBP_CARDIAC_MUSCLE_MYOBLAST_PROLIFERATION	ATF2	GATA6	MALAT1	MEIS2	MIR10A	MIR134	MIR204
GOBP_CARDIAC_MUSCLE_TISSUE_MORPHOGENESIS	https://www.gsea-msigdb.org/gsea/msigdb/human/geneset/GOBP_CARDIAC_MUSCLE_TISSUE_MORPHOGENESIS	ACTC1	ANKRD1	BMP10	BMP2	BMPR1A	CHD7	COL11A1	DLL4	DSP	EDNRA	EGLN1	ENG	FGFR2	FKBP1A	FOXC1	FOXC2	FOXH1	HAND1	HEG1	HEY2	ISL1	LRP2	MED1	MIR195	MYBPC3	MYH6	MYH7	MYL2	MYL3	MYLK2	NAGLU	NKX2-5	NOG	NOTCH1	NRG1	PKP2	POU4F1	PROX1	PTCD2	RBPJ	RYR2	S1PR1	SMAD4	SMAD7	TBX20	TCAP	TGFB1	TGFB2
GOBP_CARDIAC_MUSCLE_TISSUE_REGENERATION	https://www.gsea-msigdb.org/gsea/msigdb/human/geneset/GOBP_CARDIAC_MUSCLE_TISSUE_REGENERATION	CDKN1A	CDKN1B	ERBB4	GATA4	MIR199A1	MIR590	RUNX1	YAP1
GOBP_CARDIAC_MYOFIBRIL_ASSEMBLY	https://www.gsea-msigdb.org/gsea/msigdb/human/geneset/GOBP_CARDIAC_MYOFIBRIL_ASSEMBLY	ACTC1	ADPRHL1	CSRP3	FHOD3	MEF2A	MYL2	MYLK3	NEB	NEBL	NKX2-5	NRAP	OBSL1	PDGFRA	PDGFRB	PROX1	SMAD4	SRF	TCAP	TTN
GOBP_CARDIAC_NEURAL_CREST_CELL_DEVELOPMENT_INVOLVED_IN_OUTFLOW_TRACT_MORPHOGENESIS	https://www.gsea-msigdb.org/gsea/msigdb/human/geneset/GOBP_CARDIAC_NEURAL_CREST_CELL_DEVELOPMENT_INVOLVED_IN_OUTFLOW_TRACT_MORPHOGENESIS	BMP4	BMP7	CDC42	EDN1	EDNRA	ENG	FOLR1	HAND2	HES1	JAG1	PITX2	SEMA3C	TWIST1
GOBP_CARDIAC_NEURAL_CREST_CELL_DIFFERENTIATION_INVOLVED_IN_HEART_DEVELOPMENT	https://www.gsea-msigdb.org/gsea/msigdb/human/geneset/GOBP_CARDIAC_NEURAL_CREST_CELL_DIFFERENTIATION_INVOLVED_IN_HEART_DEVELOPMENT	BMP4	BMP7	CDC42	CITED2	EDN1	EDNRA	ENG	FOLR1	HAND2	HES1	JAG1	MAPK1	MAPK3	PITX2	SEMA3C	TWIST1
GOBP_CARDIAC_NEURAL_CREST_CELL_MIGRATION_INVOLVED_IN_OUTFLOW_TRACT_MORPHOGENESIS	https://www.gsea-msigdb.org/gsea/msigdb/human/geneset/GOBP_CARDIAC_NEURAL_CREST_CELL_MIGRATION_INVOLVED_IN_OUTFLOW_TRACT_MORPHOGENESIS	BMP4	BMP7	CDC42	EDN1	EDNRA	ENG	FOLR1	HAND2	PITX2	SEMA3C	TWIST1
GOBP_CARDIAC_PACEMAKER_CELL_DEVELOPMENT	https://www.gsea-msigdb.org/gsea/msigdb/human/geneset/GOBP_CARDIAC_PACEMAKER_CELL_DEVELOPMENT	BMPR1A	BVES	ISL1	MAML1	NKX2-5	SHOX2	TBX18	TBX3	TBX5
GOBP_CARDIAC_PACEMAKER_CELL_DIFFERENTIATION	https://www.gsea-msigdb.org/gsea/msigdb/human/geneset/GOBP_CARDIAC_PACEMAKER_CELL_DIFFERENTIATION	BMPR1A	BVES	ISL1	KCNJ8	MAML1	MESP1	NKX2-5	SHOX2	TBX18	TBX3	TBX5
GOBP_CARDIAC_RIGHT_VENTRICLE_MORPHOGENESIS	https://www.gsea-msigdb.org/gsea/msigdb/human/geneset/GOBP_CARDIAC_RIGHT_VENTRICLE_MORPHOGENESIS	BMP4	BMPR1A	CHD7	FOXH1	GATA3	GATA4	HAND1	HAND2	HEY2	ISL1	JAG1	MIR17HG	NKX2-5	NOTCH1	PPP1R13L	SEMA3C	SMARCD3	SOX4	TBX20	TGFB2	ZFPM2
GOBP_CARDIAC_SEPTUM_CELL_DIFFERENTIATION	https://www.gsea-msigdb.org/gsea/msigdb/human/geneset/GOBP_CARDIAC_SEPTUM_CELL_DIFFERENTIATION	BMPR1A	KCNJ8	MAML1	NKX2-5	TBX5
GOBP_CARDIAC_SEPTUM_DEVELOPMENT	https://www.gsea-msigdb.org/gsea/msigdb/human/geneset/GOBP_CARDIAC_SEPTUM_DEVELOPMENT	ACVR1	ADAMTS6	ANK2	AP2B1	APLNR	BMP4	BMP5	BMP7	BMPR1A	BMPR2	CCN1	CHD7	CITED2	CNTRL	CRELD1	DAND5	DCTN5	DHRS3	DNAH11	EGLN1	ENG	FGF8	FGFR2	FGFRL1	FRS2	FZD1	FZD2	GATA3	GATA4	GATA6	GJA5	HAND1	HECTD1	HEG1	HES1	HEY1	HEY2	HEYL	HOXA13	ISL1	JAG1	KCNJ8	LMO4	LRP2	LUZP1	MAML1	MATR3	MDM2
GOBP_CARDIAC_SEPTUM_MORPHOGENESIS	https://www.gsea-msigdb.org/gsea/msigdb/human/geneset/GOBP_CARDIAC_SEPTUM_MORPHOGENESIS	ACVR1	APLNR	BMP4	BMP5	BMP7	BMPR1A	BMPR2	CCN1	CHD7	CITED2	DHRS3	DNAH11	EGLN1	ENG	FGF8	FGFR2	FGFRL1	FZD1	FZD2	GATA4	GATA6	HAND1	HES1	HEY1	HEY2	HEYL	ISL1	JAG1	LRP2	MDM2	MIR1-1	MIR17HG	MKS1	MSX2	NKX2-5	NOG	NOS3	NOTCH1	NOTCH2	NRP1	NRP2	NSD2	PARVA	PROX1	RBM15	RBPJ	ROBO1	ROBO2
GOBP_CARDIAC_VASCULAR_SMOOTH_MUSCLE_CELL_DIFFERENTIATION	https://www.gsea-msigdb.org/gsea/msigdb/human/geneset/GOBP_CARDIAC_VASCULAR_SMOOTH_MUSCLE_CELL_DIFFERENTIATION	GATA6	GPER1	HEY2	MESP1	MIR1-1	MIR145	MYOCD	NOTCH1	SRF	VEGFA
GOBP_CARDIAC_VENTRICLE_DEVELOPMENT	https://www.gsea-msigdb.org/gsea/msigdb/human/geneset/GOBP_CARDIAC_VENTRICLE_DEVELOPMENT	ACVR1	AP2B1	APLNR	BMP10	BMP4	BMPR1A	BMPR2	CCN1	CHD7	CITED2	CNTRL	COL11A1	CPE	DAND5	DCTN5	DLL4	DSP	EDNRA	EGLN1	ENG	FGFR2	FGFRL1	FKBP1A	FOXC1	FOXC2	FOXF1	FOXH1	FRS2	FZD1	FZD2	GATA3	GATA4	GJA5	GREB1L	GRHL2	GSK3A	HAND1	HAND2	HECTD1	HEG1	HES1	HEY1	HEY2	HEYL	HIF1A	HOXA13	ISL1	JAG1
GOBP_CARDIAC_VENTRICLE_FORMATION	https://www.gsea-msigdb.org/gsea/msigdb/human/geneset/GOBP_CARDIAC_VENTRICLE_FORMATION	HAND1	HAND2	MEF2C	MESP1	NKX2-5	NOTCH1	SMARCD3	TBX5
GOBP_CARDIAC_VENTRICLE_MORPHOGENESIS	https://www.gsea-msigdb.org/gsea/msigdb/human/geneset/GOBP_CARDIAC_VENTRICLE_MORPHOGENESIS	BMP10	BMP4	BMPR1A	CHD7	COL11A1	CPE	DLL4	DSP	EDNRA	ENG	FGFR2	FKBP1A	FOXC1	FOXC2	FOXF1	FOXH1	GATA3	GATA4	GRHL2	GSK3A	HAND1	HAND2	HEG1	HEY1	HEY2	HEYL	HIF1A	ISL1	JAG1	LRP2	MED1	MEF2C	MESP1	MIR17HG	MYBPC3	MYH6	MYH7	MYL2	MYL3	NAGLU	NKX2-5	NOG	NOTCH1	NPY2R	NPY5R	NRG1	PKP2	POU4F1
GOBP_CARDIOBLAST_DIFFERENTIATION	https://www.gsea-msigdb.org/gsea/msigdb/human/geneset/GOBP_CARDIOBLAST_DIFFERENTIATION	DHX36	EEF1AKMT4-ECE2	EOMES	GREM1	ISL1	ITGB1	MYOCD	NKX2-5	NOTCH1	NRG1	PRICKLE1	RBPJ	REST	SRF	TBX2	TBX5	TBXT	TGFB2
GOBP_CARDIOBLAST_PROLIFERATION	https://www.gsea-msigdb.org/gsea/msigdb/human/geneset/GOBP_CARDIOBLAST_PROLIFERATION	CTNNB1	EYA1	HAND2	HES1	ISL1	MIR20A	MKS1	NOTCH1	PIM1	SIX1	TBX5
GOBP_CARDIOCYTE_DIFFERENTIATION	https://www.gsea-msigdb.org/gsea/msigdb/human/geneset/GOBP_CARDIOCYTE_DIFFERENTIATION	ACADM	ACTC1	ACTN2	ACVR1	ADPRHL1	ADRA1A	AKAP13	AKAP6	ALPK2	ALPK3	ARRB2	ASB2	ATG5	BMP10	BMP2	BMP4	BMP7	BMPR1A	BVES	CALR	CAV3	CBY1	CDC42	CDK1	CITED2	CSRP3	CTDP1	CXADR	DHX36	DKK1	DLL1	EDN1	EDNRA	EEF1AKMT4-ECE2	EFNB2	EGFR	ENG	EOMES	FHL2	FHOD3	FOLR1	FOXP1	FRS2	FZD7	G6PD	GATA4	GATA6	GPER1
GOBP_CARDIOLIPIN_ACYL_CHAIN_REMODELING	https://www.gsea-msigdb.org/gsea/msigdb/human/geneset/GOBP_CARDIOLIPIN_ACYL_CHAIN_REMODELING	HADHA	LCLAT1	PLA2G5	PLA2G6	TAFAZZIN	THEM5
GOBP_CARDIOLIPIN_BIOSYNTHETIC_PROCESS	https://www.gsea-msigdb.org/gsea/msigdb/human/geneset/GOBP_CARDIOLIPIN_BIOSYNTHETIC_PROCESS	CRLS1	PGS1	PLA2G6	PLSCR3	PTPMT1	SLC27A1	TAFAZZIN	TAMM41
GOBP_CARDIOLIPIN_METABOLIC_PROCESS	https://www.gsea-msigdb.org/gsea/msigdb/human/geneset/GOBP_CARDIOLIPIN_METABOLIC_PROCESS	CRLS1	DNAJC19	HADHA	LCLAT1	MECP2	PGS1	PHB2	PLA2G5	PLA2G6	PLSCR3	PNPLA8	PTPMT1	SLC27A1	TAFAZZIN	TAMM41	THEM5
GOBP_CARNITINE_METABOLIC_PROCESS	https://www.gsea-msigdb.org/gsea/msigdb/human/geneset/GOBP_CARNITINE_METABOLIC_PROCESS	ACADL	ACADM	ALDH9A1	BBOX1	CPT1A	CPT1B	CPT1C	CPT2	CRAT	CROT	SLC22A4	TMLHE
GOBP_CARNITINE_TRANSMEMBRANE_TRANSPORT	https://www.gsea-msigdb.org/gsea/msigdb/human/geneset/GOBP_CARNITINE_TRANSMEMBRANE_TRANSPORT	SLC16A9	SLC22A1	SLC22A16	SLC22A4	SLC22A5	SLC25A20	SLC6A14
GOBP_CARNITINE_TRANSPORT	https://www.gsea-msigdb.org/gsea/msigdb/human/geneset/GOBP_CARNITINE_TRANSPORT	PDZK1	SLC16A9	SLC22A1	SLC22A16	SLC22A4	SLC22A5	SLC25A20	SLC25A29	SLC6A14
GOBP_CARTILAGE_CONDENSATION	https://www.gsea-msigdb.org/gsea/msigdb/human/geneset/GOBP_CARTILAGE_CONDENSATION	BARX2	BMP1	BMPR1B	CCN2	COL11A1	COL2A1	FGF4	FGF6	MAPK14	MGP	MYF5	OTOR	PKD1	SOX5	SOX6	SOX9	THRA	UNCX	WNT7A
GOBP_CARTILAGE_DEVELOPMENT	https://www.gsea-msigdb.org/gsea/msigdb/human/geneset/GOBP_CARTILAGE_DEVELOPMENT	ACVRL1	ADAMTS12	ADAMTS7	AMELX	ANXA6	ARID5A	ATF2	ATP7A	AXIN2	BARX2	BBS1	BBS2	BGN	BMP1	BMP10	BMP2	BMP3	BMP4	BMP5	BMP6	BMP7	BMP8A	BMP8B	BMPR1A	BMPR1B	BMPR2	BPNT2	CBS	CCN1	CCN2	CCN3	CCN4	CD44	CER1	CHADL	CHI3L1	CHRDL2	CHST11	CHSY1	CNMD	COL11A1	COL11A2	COL1A1	COL27A1	COL2A1	COL3A1	COMP	CREB3L2
GOBP_CARTILAGE_DEVELOPMENT_INVOLVED_IN_ENDOCHONDRAL_BONE_MORPHOGENESIS	https://www.gsea-msigdb.org/gsea/msigdb/human/geneset/GOBP_CARTILAGE_DEVELOPMENT_INVOLVED_IN_ENDOCHONDRAL_BONE_MORPHOGENESIS	ANXA6	ATF2	AXIN2	CBS	CER1	COL1A1	COL27A1	COL2A1	COMP	ENSG00000274276	EXT1	FOSL2	GHR	HOXA11	IFT80	IHH	MATN1	MMP13	NPPC	NPR2	RARA	RARB	RARG	SERPINH1	SHOX2	SMPD3	SOX9	STC1	TGFBR2	THBS3	TRIP11	TRPV4	TSKU	ZMPSTE24
GOBP_CARTILAGE_MORPHOGENESIS	https://www.gsea-msigdb.org/gsea/msigdb/human/geneset/GOBP_CARTILAGE_MORPHOGENESIS	HAND1	HAND2	HOXA5	MATN1	MSX1	RSPO2	SNAI1	SNAI2	STC1	WNT7B
GOBP_CATECHOLAMINE_SECRETION	https://www.gsea-msigdb.org/gsea/msigdb/human/geneset/GOBP_CATECHOLAMINE_SECRETION	ABAT	ADORA2A	ADORA3	ADRA2A	ADRA2B	ADRA2C	CARTPT	CHGA	CHRNA4	CHRNA6	CHRNA7	CHRNB2	CNR1	CRH	CXCL12	DRD2	DRD3	DTNBP1	FFAR3	FGF20	GABBR1	GDNF	GHSR	GNAT1	GRK2	GRM2	HRH3	HTR1B	HTR2A	KCNA2	KCNB1	KPNA4	MECP2	OPRK1	OXTR	P2RY1	PINK1	PRKCB	PRKN	SDHD	SLC18A2	SNCA	SNCG	STX1A	SYT1	SYT10	SYT11	SYT12
GOBP_CATECHOLAMINE_UPTAKE	https://www.gsea-msigdb.org/gsea/msigdb/human/geneset/GOBP_CATECHOLAMINE_UPTAKE	ACTB	DRD1	DRD2	DRD3	DRD4	GDNF	MAPK15	PARK7	PRKN	RAB3B	SLC22A1	SLC22A2	SLC22A3	SLC29A4	SLC6A2	SLC6A3	SNCA	TOR1A
GOBP_CATECHOLAMINE_UPTAKE_INVOLVED_IN_SYNAPTIC_TRANSMISSION	https://www.gsea-msigdb.org/gsea/msigdb/human/geneset/GOBP_CATECHOLAMINE_UPTAKE_INVOLVED_IN_SYNAPTIC_TRANSMISSION	DRD1	DRD2	DRD3	DRD4	GDNF	PARK7	PRKN	RAB3B	SLC6A2	SLC6A3	SNCA	TOR1A
GOBP_CATECHOL_CONTAINING_COMPOUND_BIOSYNTHETIC_PROCESS	https://www.gsea-msigdb.org/gsea/msigdb/human/geneset/GOBP_CATECHOL_CONTAINING_COMPOUND_BIOSYNTHETIC_PROCESS	ALDH2	DAO	DBH	DDC	GATA3	GCH1	GPR37	HAND2	HDC	INSM1	KL	MOXD1	MOXD2P	NR4A2	PAH	PARK7	PNMT	SLC6A3	SNCA	TGFB2	TH	VPS35
GOBP_CATECHOL_CONTAINING_COMPOUND_CATABOLIC_PROCESS	https://www.gsea-msigdb.org/gsea/msigdb/human/geneset/GOBP_CATECHOL_CONTAINING_COMPOUND_CATABOLIC_PROCESS	COMT	DBH	MAOA	MAOB	MOXD1	MOXD2P	SLC6A3	SULT1A3	SULT1A4
GOBP_CATECHOL_CONTAINING_COMPOUND_METABOLIC_PROCESS	https://www.gsea-msigdb.org/gsea/msigdb/human/geneset/GOBP_CATECHOL_CONTAINING_COMPOUND_METABOLIC_PROCESS	ABAT	ALDH2	AOC2	ATP7A	CHRNB2	COMT	DAO	DBH	DDC	DRD1	DRD2	DRD3	DRD4	EDNRA	EPAS1	GATA3	GCH1	GNAT2	GPR37	GRIN2A	HAND2	HDC	HPRT1	HTR1A	INSM1	ITGAM	ITGB2	KL	MAOA	MAOB	MOXD1	MOXD2P	MTPN	NPR1	NR4A2	PAH	PARK7	PDE1B	PNKD	PNMT	PRKN	RNF180	RTL4	SLC1A1	SLC6A3	SNCA	SNCAIP	SNCB
GOBP_CAVEOLA_ASSEMBLY	https://www.gsea-msigdb.org/gsea/msigdb/human/geneset/GOBP_CAVEOLA_ASSEMBLY	CAV1	CAV2	CAV3	EMP2	PACSIN2
GOBP_CAVEOLIN_MEDIATED_ENDOCYTOSIS	https://www.gsea-msigdb.org/gsea/msigdb/human/geneset/GOBP_CAVEOLIN_MEDIATED_ENDOCYTOSIS	CAV1	CAV3	CLN3	MAPK1	MAPK3	MLC1	NEDD4L	PACSIN2	PROM2	SRC	UNC119
GOBP_CD40_SIGNALING_PATHWAY	https://www.gsea-msigdb.org/gsea/msigdb/human/geneset/GOBP_CD40_SIGNALING_PATHWAY	CD40	CD40LG	CD86	FANCA	FANCD2	ITGA5	ITGB1	PHB1	PHB2	RNF31	SHARPIN	SLAMF1	TNFAIP3	TNIP2	TRAF3IP2	TREM2
GOBP_CD4_POSITIVE_ALPHA_BETA_T_CELL_ACTIVATION	https://www.gsea-msigdb.org/gsea/msigdb/human/geneset/GOBP_CD4_POSITIVE_ALPHA_BETA_T_CELL_ACTIVATION	AGER	ANXA1	ARG2	ARMC5	ASCL2	ATP7A	BATF	BCL3	BCL6	BRAF	CARD11	CBFB	CBLB	CCL19	CD160	CD274	CD28	CD3E	CD55	CD80	CD81	CD83	CD86	CDH26	CTSL	ENTPD7	FOXP1	FOXP3	FUT7	GATA3	GPR183	HLA-DRA	HLA-DRB1	HLA-DRB3	HLX	HMGB1	IFNG	IL12B	IL12RB1	IL18	IL18R1	IL2	IL21	IL23A	IL23R	IL27	IL2RA	IL2RG
GOBP_CD4_POSITIVE_ALPHA_BETA_T_CELL_CYTOKINE_PRODUCTION	https://www.gsea-msigdb.org/gsea/msigdb/human/geneset/GOBP_CD4_POSITIVE_ALPHA_BETA_T_CELL_CYTOKINE_PRODUCTION	ARG1	ARID5A	CD81	DENND1B	GATA3	IFNA2	IFNB1	IL18	IL18R1	IL1B	IL1R1	IL4	IL6	NLRP3	PRKCZ	RSAD2	SLAMF1	TBX21	XCL1
GOBP_CD4_POSITIVE_ALPHA_BETA_T_CELL_DIFFERENTIATION	https://www.gsea-msigdb.org/gsea/msigdb/human/geneset/GOBP_CD4_POSITIVE_ALPHA_BETA_T_CELL_DIFFERENTIATION	ANXA1	ARMC5	ASCL2	ATP7A	BATF	BCL3	BCL6	BRAF	CBFB	CCL19	CD80	CD83	CD86	CTSL	ENTPD7	FOXP1	FOXP3	FUT7	GATA3	GPR183	HLA-DRA	HLA-DRB1	HLX	HMGB1	IFNG	IL12B	IL12RB1	IL18	IL18R1	IL2	IL21	IL23A	IL23R	IL27	IL2RG	IL4	IL4R	IL6	IL6R	IRF4	JAK1	JAK3	JUNB	KLHL25	KMT2A	LEF1	LGALS9	LOXL3
GOBP_CD4_POSITIVE_ALPHA_BETA_T_CELL_PROLIFERATION	https://www.gsea-msigdb.org/gsea/msigdb/human/geneset/GOBP_CD4_POSITIVE_ALPHA_BETA_T_CELL_PROLIFERATION	ARG2	CARD11	CBLB	CD274	CD28	CD3E	CD55	CD81	FOXP3	IL2	IL2RA	ITCH	LGALS9	LGALS9B	LGALS9C	NDFIP1	PRKCQ	RIPK2	TGFBR2	TWSG1	VSIR	XCL1
GOBP_CD4_POSITIVE_CD25_POSITIVE_ALPHA_BETA_REGULATORY_T_CELL_DIFFERENTIATION	https://www.gsea-msigdb.org/gsea/msigdb/human/geneset/GOBP_CD4_POSITIVE_CD25_POSITIVE_ALPHA_BETA_REGULATORY_T_CELL_DIFFERENTIATION	FOXP3	FUT7	HLA-DRA	HLA-DRB1	IFNG	IL2RG	KLHL25	LGALS9	PLA2G2D	TOX
GOBP_CD4_POSITIVE_OR_CD8_POSITIVE_ALPHA_BETA_T_CELL_LINEAGE_COMMITMENT	https://www.gsea-msigdb.org/gsea/msigdb/human/geneset/GOBP_CD4_POSITIVE_OR_CD8_POSITIVE_ALPHA_BETA_T_CELL_LINEAGE_COMMITMENT	BATF	BCL2	BRAF	CTSL	FOXP3	IL12B	IL12RB1	IL23A	IL23R	IL6	IL6R	IRF4	JAK1	LOXL3	LY9	MTOR	SHH	SLAMF6	SOCS3	SPN	STAT3	STAT6	TBX21	TNFSF18	TOX	ZFPM1
GOBP_CD8_POSITIVE_ALPHA_BETA_T_CELL_ACTIVATION	https://www.gsea-msigdb.org/gsea/msigdb/human/geneset/GOBP_CD8_POSITIVE_ALPHA_BETA_T_CELL_ACTIVATION	BCL2	CBFB	CD274	CLEC4A	CRTAM	DAPL1	EOMES	GPR18	HFE	HLA-A	HLA-E	IRF1	LILRB1	LILRB4	MAPK8IP1	NCKAP1L	PSMB11	PTPN22	RUNX1	RUNX3	SH3RF1	SLC4A2	SOCS1	TNFSF8	TOX	VSIR	WDFY4	XCL1	ZBTB7B
GOBP_CD8_POSITIVE_ALPHA_BETA_T_CELL_DIFFERENTIATION	https://www.gsea-msigdb.org/gsea/msigdb/human/geneset/GOBP_CD8_POSITIVE_ALPHA_BETA_T_CELL_DIFFERENTIATION	BCL2	CBFB	EOMES	GPR18	IRF1	LILRB4	NCKAP1L	PSMB11	RUNX1	RUNX3	SLC4A2	SOCS1	TNFSF8	TOX	ZBTB7B
GOBP_CD8_POSITIVE_ALPHA_BETA_T_CELL_PROLIFERATION	https://www.gsea-msigdb.org/gsea/msigdb/human/geneset/GOBP_CD8_POSITIVE_ALPHA_BETA_T_CELL_PROLIFERATION	HLA-A	HLA-E	IRF1	MAPK8IP1	PTPN22	SH3RF1	SLC4A2	VSIR	XCL1
GOBP_CDC42_PROTEIN_SIGNAL_TRANSDUCTION	https://www.gsea-msigdb.org/gsea/msigdb/human/geneset/GOBP_CDC42_PROTEIN_SIGNAL_TRANSDUCTION	ABCA1	ABL1	APOA1	APOC3	APOE	CDC42	NRP1	NTN1	RALBP1	RHOBTB1	RHOBTB2	RHOJ	RHOU	RHOV	RIT2	SHTN1	WAS
GOBP_CDP_CHOLINE_PATHWAY	https://www.gsea-msigdb.org/gsea/msigdb/human/geneset/GOBP_CDP_CHOLINE_PATHWAY	CDS1	CEPT1	CHKA	CHKB	CHPT1	PCYT1A	PCYT1B
GOBP_CDP_DIACYLGLYCEROL_BIOSYNTHETIC_PROCESS	https://www.gsea-msigdb.org/gsea/msigdb/human/geneset/GOBP_CDP_DIACYLGLYCEROL_BIOSYNTHETIC_PROCESS	AGPAT1	AGPAT2	AGPAT3	AGPAT4	AGPAT5	CDS1	CDS2	GPAM	GPAT2	GPAT3	GPAT4	LCLAT1	TAMM41
GOBP_CELLULAR_ALDEHYDE_METABOLIC_PROCESS	https://www.gsea-msigdb.org/gsea/msigdb/human/geneset/GOBP_CELLULAR_ALDEHYDE_METABOLIC_PROCESS	ABCA4	ADH4	ADH5	AGXT	AGXT2	AKR1A1	AKR1C1	AKR1C3	AKR7A2	AKR7A3	ALDH1A1	ALDH1A2	ALDH1A3	ALDH2	ALDH3A1	ALDH3A2	ALDH3B1	ALDH3B2	ALDH7A1	ALDH8A1	ALDH9A1	ALDOB	ALPL	BCO1	BCO2	BMP2	BMP5	BMP6	CACNA1H	CLCN2	CYP11B1	CYP11B2	CYP1B1	CYP27C1	DAB2	DHRS4	DHRS4L1	DHRS4L2	DKK3	EDNRB	ESD	GATD1	GLO1	GLYCTK	GRHPR	HAGH	HOGA1	HYI
GOBP_CELLULAR_CATABOLIC_PROCESS	https://www.gsea-msigdb.org/gsea/msigdb/human/geneset/GOBP_CELLULAR_CATABOLIC_PROCESS	A1CF	AADAC	AADAT	AASDHPPT	AASS	ABAT	ABCA2	ABCA7	ABCB11	ABCC1	ABCC2	ABCD1	ABCD2	ABCD3	ABCD4	ABHD1	ABHD12	ABHD12B	ABHD16A	ABHD16B	ABHD2	ABHD3	ABHD5	ABHD6	ABL1	ABL2	ACAA1	ACAA2	ACACB	ACAD10	ACAD11	ACAD8	ACADL	ACADM	ACADS	ACADSB	ACADVL	ACAT1	ACAT2	ACBD5	ACE	ACER1	ACER2	ACER3	ACHE	ACMSD	ACOT4	ACOT7
GOBP_CELLULAR_COMPONENT_ASSEMBLY_INVOLVED_IN_MORPHOGENESIS	https://www.gsea-msigdb.org/gsea/msigdb/human/geneset/GOBP_CELLULAR_COMPONENT_ASSEMBLY_INVOLVED_IN_MORPHOGENESIS	ABCA2	ACRBP	ACTA1	ACTC1	ACTG1	ACTL7A	ACTL8	ACTL9	ACTN2	ADPRHL1	AGFG1	AKAP13	ANK2	ANKRD1	ANKRD23	BMP10	CAPN3	CASQ1	CAV3	CCDC136	CCDC42	CD9	CFL2	CFLAR	CLASP1	CLASP2	CNTN1	CNTNAP1	CSRP1	CSRP2	CSRP3	DAG1	DICER1	EDN1	EPB41L3	ERCC2	FHOD3	FIG4	FLII	FLNC	GARIN1A	GARIN1B	GNPAT	GPC1	IHH	ITGB1	ITGB4	KLHL41
GOBP_CELLULAR_COMPONENT_DISASSEMBLY	https://www.gsea-msigdb.org/gsea/msigdb/human/geneset/GOBP_CELLULAR_COMPONENT_DISASSEMBLY	ABCC8	ABCE1	ACIN1	ACTN2	ACVR1C	ADAM10	ADAM15	ADAM8	ADAMTS15	ADAMTS4	ADAMTS5	ADCY10	ADD1	ADD2	ADD3	ADGRB3	ADRB2	AIFM1	AKAP8L	AMBRA1	APAF1	APC	APC2	APEH	ARF6	ARFIP2	ARHGEF2	ARID1A	ARID2	ASCC2	ASCC3	ASPH	ATG12	ATG13	ATG14	ATG2A	ATG2B	ATG3	ATG4B	ATG4D	ATG5	ATG7	ATG9A	ATG9B	ATP13A2	ATP2A2	ATP5IF1	ATXN7
GOBP_CELLULAR_COMPONENT_DISASSEMBLY_INVOLVED_IN_EXECUTION_PHASE_OF_APOPTOSIS	https://www.gsea-msigdb.org/gsea/msigdb/human/geneset/GOBP_CELLULAR_COMPONENT_DISASSEMBLY_INVOLVED_IN_EXECUTION_PHASE_OF_APOPTOSIS	ACIN1	ACVR1C	AIFM1	APAF1	BAX	BLCAP	BOK	CAPN10	CDK5RAP3	CECR2	CIDEA	DEDD2	DFFA	DFFB	DICER1	DNASE1L3	DNASE2	DNASE2B	ENDOG	ERN2	EXOG	FOXL2	GPER1	HSF1	IL6	KDM4A	MIR146A	NMNAT1	SHARPIN	ST20	TOP2A	VPS54
GOBP_CELLULAR_COMPONENT_MAINTENANCE	https://www.gsea-msigdb.org/gsea/msigdb/human/geneset/GOBP_CELLULAR_COMPONENT_MAINTENANCE	ABHD17B	ADGRB3	APOE	APPL1	ARF6	BSN	C1QL1	CAMSAP3	CBLN1	CBLN2	CBLN3	CD177	CHCHD10	CLDN1	CLDN3	CLRN2	CNTNAP1	CSF1R	CTBP2	CTTN	DCTN1	DLG1	ERC1	ERC2	F2R	F2RL1	FCGR2B	FERMT2	FYN	GRIN2B	HOMER1	IGF1R	INAVA	INS	INSR	ITGA3	ITGB3	ITPKA	KIFC3	KIRREL1	LNPK	MIR30B	MTMR2	MTSS1	MYADM	MYOCD	NEDD9	NLGN1
GOBP_CELLULAR_COMPONENT_MORPHOGENESIS	https://www.gsea-msigdb.org/gsea/msigdb/human/geneset/GOBP_CELLULAR_COMPONENT_MORPHOGENESIS	ABCA2	ABI1	ABI2	ABI3	ABITRAM	ABL1	ACRBP	ACTA1	ACTB	ACTBL2	ACTC1	ACTG1	ACTL7A	ACTL8	ACTL9	ACTN2	ADAM17	ADARB1	ADCY1	ADCY10	ADGRB1	ADGRB3	ADNP	ADORA2A	ADPRHL1	AFG3L2	AGFG1	AKAP13	ALCAM	ALS2	AMIGO1	ANAPC2	ANK2	ANK3	ANKRD1	ANKRD23	ANKRD27	ANO1	ANOS1	APBB1	APLP1	APLP2	APOE	APP	ARC	ARHGAP33	ARHGAP35	ARHGAP4
GOBP_CELLULAR_DEFENSE_RESPONSE	https://www.gsea-msigdb.org/gsea/msigdb/human/geneset/GOBP_CELLULAR_DEFENSE_RESPONSE	ADORA2A	BCL10	BECN1	C5AR1	CCR2	CCR3	CCR5	CCR6	CCR9	CD300C	CD5L	CLEC5A	CX3CR1	CXCL9	CXCR2	DCDC2	FCMR	FOSL1	GNLY	HLA-G	IL1RL2	IL33	ITGB1	ITK	KIR2DL4	KIR2DS3	KIR3DL2	KLRC2	KLRC3	KLRG1	LBP	LGALS3BP	LILRB2	LSP1	LY96	MNDA	NCF1	NCF2	NCR1	NCR2	PRF1	PTK2B	RAB23	RELA	SH2D1A	SPN	TCIRG1	TRAT1
GOBP_CELLULAR_DETOXIFICATION_OF_ALDEHYDE	https://www.gsea-msigdb.org/gsea/msigdb/human/geneset/GOBP_CELLULAR_DETOXIFICATION_OF_ALDEHYDE	ADH4	ADH5	AKR1A1	AKR1B10	ALDH1A1	ESD	PARK7	RDH11	RDH12
GOBP_CELLULAR_EXTRAVASATION	https://www.gsea-msigdb.org/gsea/msigdb/human/geneset/GOBP_CELLULAR_EXTRAVASATION	ADAM8	ADD2	AGER	AZU1	BCR	BST1	CCL2	CCL21	CCL25	CCL28	CCR2	CD177	CD47	CD99	CD99L2	CHST2	CHST4	CRK	CRKL	CX3CL1	CX3CR1	CXCL12	ELANE	EXT1	F11R	FADD	FER	FUT4	FUT7	FUT9	GCNT1	GOLPH3	GP1BA	ICAM1	IL1R1	IL27RA	ITGA1	ITGA4	ITGAL	ITGB1	ITGB7	JAM2	JAM3	JAML	LEP	LYVE1	MADCAM1	MDK
GOBP_CELLULAR_GLUCURONIDATION	https://www.gsea-msigdb.org/gsea/msigdb/human/geneset/GOBP_CELLULAR_GLUCURONIDATION	ABHD10	PRKCE	UGT1A1	UGT1A10	UGT1A3	UGT1A4	UGT1A5	UGT1A6	UGT1A7	UGT1A8	UGT1A9	UGT2A1	UGT2A2	UGT2A3	UGT2B10	UGT2B11	UGT2B15	UGT2B17	UGT2B28	UGT2B4	UGT2B7
GOBP_CELLULAR_HOMEOSTASIS	https://www.gsea-msigdb.org/gsea/msigdb/human/geneset/GOBP_CELLULAR_HOMEOSTASIS	ABCA12	ABCA2	ABCB6	ABCB7	ABCB8	ABCC6	ABCC8	ABL1	ACE	ACO1	ADCY5	ADCY8	ADNP	ADORA1	ADRA2A	AFG3L2	AGER	AIM2	AKAP6	ALAS2	ALDOA	ALPL	AMBRA1	ANK2	ANKH	ANKRD9	ANO1	ANO6	ANXA6	AP3B1	APEX1	APLNR	APOE	APP	AQP1	AQP11	AQP4	ARF1	ASL	ATF4	ATG5	ATOX1	ATP12A	ATP13A1	ATP13A2	ATP13A3	ATP13A4	ATP13A5
GOBP_CELLULAR_HYPEROSMOTIC_RESPONSE	https://www.gsea-msigdb.org/gsea/msigdb/human/geneset/GOBP_CELLULAR_HYPEROSMOTIC_RESPONSE	AKR1B1	AQP1	ARHGEF2	EFHD1	EPO	FBP1	LETM1	MICU1	NFAT5	OXSR1	PCK1	RCSD1	SLC25A23	SLC2A1	STK39	WNK1	WNK3	XRCC5	XRCC6	YBX3
GOBP_CELLULAR_HYPOTONIC_RESPONSE	https://www.gsea-msigdb.org/gsea/msigdb/human/geneset/GOBP_CELLULAR_HYPOTONIC_RESPONSE	AQP5	CAB39	FBP1	MYLK	OXSR1	PCK1	SLC12A6	SLC4A11	STK39	TRPV4	TSPO
GOBP_CELLULAR_KETONE_METABOLIC_PROCESS	https://www.gsea-msigdb.org/gsea/msigdb/human/geneset/GOBP_CELLULAR_KETONE_METABOLIC_PROCESS	AADAT	ABCB11	ABCD1	ABCD2	ACACB	ACADL	ACADVL	ACMSD	ADH4	ADIPOQ	ADM	AFMID	AFP	AIFM2	AKR1A1	AKR1B1	AKR1B10	AKR1C1	AKR1C2	AKR1C3	AKR1C4	AKR7A2	AKT1	AKT2	ALDH8A1	ANXA1	APOA4	APOA5	APOC1	APOC2	APOC3	APPL2	ATCAY	ATP2B4	AVP	AVPR1A	BCKDK	BGLAP	BHMT	BMP2	BMP5	BMP6	BRCA1	CACNA1H	CAV1	CBR1	CBR4	CD74
GOBP_CELLULAR_LIPID_BIOSYNTHETIC_PROCESS	https://www.gsea-msigdb.org/gsea/msigdb/human/geneset/GOBP_CELLULAR_LIPID_BIOSYNTHETIC_PROCESS	AGPS	CHPT1	DHRS7B	FAR1	FASN	GNPAT	LIPA	LPCAT2	PEDS1	PEX7	PLA2G4A	PLA2G4C
GOBP_CELLULAR_LIPID_CATABOLIC_PROCESS	https://www.gsea-msigdb.org/gsea/msigdb/human/geneset/GOBP_CELLULAR_LIPID_CATABOLIC_PROCESS	AADAC	ABCB11	ABCD1	ABCD2	ABCD3	ABCD4	ABHD1	ABHD12	ABHD12B	ABHD16A	ABHD16B	ABHD2	ABHD3	ABHD5	ABHD6	ACAA1	ACAA2	ACACB	ACAD10	ACAD11	ACADL	ACADM	ACADS	ACADVL	ACAT1	ACAT2	ACER1	ACER2	ACER3	ACOT8	ACOX1	ACOX2	ACOX3	ACOXL	ADIPOQ	ADTRP	AIG1	AKR1B10	AKR1C3	AKT1	AKT2	ALDH1L2	AMACR	ANGPTL3	APOA2	APOA4	APOA5	APOB
GOBP_CELLULAR_LIPID_METABOLIC_PROCESS	https://www.gsea-msigdb.org/gsea/msigdb/human/geneset/GOBP_CELLULAR_LIPID_METABOLIC_PROCESS	A3GALT2	A4GALT	AACS	AADAC	AASDH	ABCA12	ABCA2	ABCA3	ABCA4	ABCA8	ABCB11	ABCD1	ABCD2	ABCD3	ABCD4	ABHD1	ABHD11	ABHD12	ABHD12B	ABHD15	ABHD16A	ABHD16B	ABHD2	ABHD3	ABHD4	ABHD5	ABHD6	ABO	ACAA1	ACAA2	ACACA	ACACB	ACAD10	ACAD11	ACAD9	ACADL	ACADM	ACADS	ACADSB	ACADVL	ACAT1	ACAT2	ACBD4	ACBD5	ACBD7	ACER1	ACER2	ACER3
GOBP_CELLULAR_METABOLIC_COMPOUND_SALVAGE	https://www.gsea-msigdb.org/gsea/msigdb/human/geneset/GOBP_CELLULAR_METABOLIC_COMPOUND_SALVAGE	ADA	ADI1	ADK	ADSL	AMPD1	AMPD2	AMPD3	APIP	APRT	BHMT	BHMT2	C9orf64	CDA	DCK	DGUOK	ENOPH1	FCSK	HPRT1	MRI1	MTAP	NAPRT	PDXK	PGM2	PNP	PRTFDC1	TK2	UCK1	UCK2	UCKL1	UPP1	UPP2
GOBP_CELLULAR_MODIFIED_AMINO_ACID_BIOSYNTHETIC_PROCESS	https://www.gsea-msigdb.org/gsea/msigdb/human/geneset/GOBP_CELLULAR_MODIFIED_AMINO_ACID_BIOSYNTHETIC_PROCESS	ACADM	ALDH7A1	ALDH9A1	ATIC	BBOX1	CHDH	CKB	CKM	CKMT1A	CKMT1B	CKMT2	DHFR	DHFR2	DHFRP1	FPGS	GAMT	GART	GATM	GCH1	MTHFS	PARK7	PLOD2	PLOD3	PLSCR1	PTDSS1	PTDSS2	SLC27A1	TMLHE
GOBP_CELLULAR_MODIFIED_AMINO_ACID_CATABOLIC_PROCESS	https://www.gsea-msigdb.org/gsea/msigdb/human/geneset/GOBP_CELLULAR_MODIFIED_AMINO_ACID_CATABOLIC_PROCESS	ABHD12	ABHD12B	ABHD16A	ABHD16B	ACADL	AGXT	ALDH4A1	BHMT	CBS	CDO1	CSAD	DIO3	DMGDH	ENSG00000274276	GGACT	GOT2	HOGA1	MTHFS	PCYOX1	PCYOX1L	PM20D2	PRODH	SARDH
GOBP_CELLULAR_MODIFIED_AMINO_ACID_METABOLIC_PROCESS	https://www.gsea-msigdb.org/gsea/msigdb/human/geneset/GOBP_CELLULAR_MODIFIED_AMINO_ACID_METABOLIC_PROCESS	AASDHPPT	ABHD12	ABHD12B	ABHD16A	ABHD16B	ACADL	ACADM	AGXT	ALDH1L2	ALDH4A1	ALDH7A1	ALDH9A1	ASS1	ATIC	BBOX1	BHMT	BHMT2	CBS	CDO1	CGA	CHDH	CKB	CKM	CKMT1A	CKMT1B	CKMT2	CPQ	CPT1A	CPT1B	CPT1C	CPT2	CRAT	CROT	CRYM	CSAD	CTNS	CTSB	CTSK	DHFR	DHFR2	DHFRP1	DIO1	DIO2	DIO3	DMGDH	DUOX1	DUOX2	DUOXA1
GOBP_CELLULAR_OXIDANT_DETOXIFICATION	https://www.gsea-msigdb.org/gsea/msigdb/human/geneset/GOBP_CELLULAR_OXIDANT_DETOXIFICATION	ALB	ALOX5AP	APOA4	APOE	APOM	ATP7A	BMP7	CAT	CCS	CD36	CLIC2	CYGB	DHFR	DHFRP1	DUOX1	DUOX2	EPX	FABP1	FANCC	FBLN5	GCH1	GPX1	GPX2	GPX3	GPX4	GPX5	GPX6	GPX7	GPX8	GSR	GSTA1	GSTK1	GSTM2	GSTO1	GSTO2	GSTP1	GSTT1	GSTZ1	H19	HBA1	HBA2	HBB	HBD	HBE1	HBG1	HBG2	HBM	HBQ1
GOBP_CELLULAR_PIGMENTATION	https://www.gsea-msigdb.org/gsea/msigdb/human/geneset/GOBP_CELLULAR_PIGMENTATION	ABCB6	ANKRD27	AP1B1	AP1G1	AP1M1	AP1S1	AP1S2	AP1S3	AP3B1	AP3D1	AP3M1	AP3S1	AP3S2	APOE	ARL6	ASIP	BACE2	BBS2	BBS5	BBS7	BCL2	BLOC1S1	BLOC1S2	BLOC1S3	BLOC1S4	BLOC1S5	BLOC1S6	CD63	CDH3	DCTN1	DCTN2	DTNBP1	GPR143	HPS1	HPS3	HPS4	HPS5	HPS6	KIF13A	LYST	MKKS	MLPH	MREG	MYO5A	MYO7A	PIKFYVE	PMEL	POMC
GOBP_CELLULAR_PROCESS_INVOLVED_IN_REPRODUCTION_IN_MULTICELLULAR_ORGANISM	https://www.gsea-msigdb.org/gsea/msigdb/human/geneset/GOBP_CELLULAR_PROCESS_INVOLVED_IN_REPRODUCTION_IN_MULTICELLULAR_ORGANISM	ABHD2	ACRBP	ACTL7A	ACTL9	ACVR1	ADAD1	ADAD2	ADAM2	ADCY10	AFF4	AGFG1	AGO4	AKAP4	AKT1	AMH	ANG	ANGPT2	ARMC12	ARMC2	ASIP	ASPM	ASZ1	ATM	AURKA	AXDND1	AXIN1	BAX	BBS2	BBS4	BCL2	BCL2L1	BMP4	BMPR1B	BNC1	BRCA2	BRDT	BRIP1	BRME1	BSPH1	BTBD18	C14orf39	C16orf92	C2CD6	CABYR	CATSPER2	CATSPER3	CATSPER4	CATSPERD
GOBP_CELLULAR_RESPIRATION	https://www.gsea-msigdb.org/gsea/msigdb/human/geneset/GOBP_CELLULAR_RESPIRATION	ABCD1	ACLY	ACO1	ACO2	ACTN3	ADSL	AFG1L	AIFM2	AK4	ANTKMT	ARL2	ATP5F1A	ATP5F1B	ATP5F1C	ATP5F1D	ATP5F1E	ATP5F1EP2	ATP5ME	ATP5MF	ATP5MG	ATP5PB	ATP5PD	ATP5PF	ATP5PO	ATP7A	ATPSCKMT	BID	BLOC1S1	BNIP3	C2orf69	CAT	CBFA2T3	CCNB1	CDK1	CHCHD10	CHCHD2	CHCHD5	CISD1	COA6	COQ10A	COQ10B	COQ9	COX10	COX15	COX4I1	COX4I2	COX5A	COX5B
GOBP_CELLULAR_RESPONSE_TO_ABIOTIC_STIMULUS	https://www.gsea-msigdb.org/gsea/msigdb/human/geneset/GOBP_CELLULAR_RESPONSE_TO_ABIOTIC_STIMULUS	ACTR5	ADSS1	ADSS2	AIPL1	AKR1B1	AKT2	ANKRD1	AQP1	AQP10	AQP2	AQP5	ARHGEF2	ASCL1	ASIC1	ASIC2	ATF4	ATM	ATP1A2	ATR	AURKB	AVPR1A	BABAM2	BAD	BAG3	BAK1	BARD1	BAX	BCL10	BCL2L1	BDKRB2	BLM	BMF	BMP6	BNIP3	BRCA1	BRCA2	BRCC3	CAB39	CALR	CAMKMT	CAPN3	CASP1	CASP2	CASP3	CASP5	CASP8	CASP8AP2	CASP9
GOBP_CELLULAR_RESPONSE_TO_ACIDIC_PH	https://www.gsea-msigdb.org/gsea/msigdb/human/geneset/GOBP_CELLULAR_RESPONSE_TO_ACIDIC_PH	AQP10	ASIC2	CHP1	KCNE1	NOX1	PCK1	PKD1L3	PKD2L1	RAB11B	RAB11FIP5	SCNN1A	SCNN1B	SCNN1D	SCNN1G	SLC38A3	SLC9A1	TRPV1
GOBP_CELLULAR_RESPONSE_TO_ACID_CHEMICAL	https://www.gsea-msigdb.org/gsea/msigdb/human/geneset/GOBP_CELLULAR_RESPONSE_TO_ACID_CHEMICAL	AMIGO1	AQP2	ASS1	ATP7A	AVPR1A	BAIAP2	BCL11A	BCL2L1	BCL2L2	BMT2	CAPN2	CASTOR1	CASTOR2	CASTOR3P	CEBPB	COL16A1	COL1A1	COL1A2	COL3A1	COL4A1	COL4A6	COL5A2	COL6A1	CPEB1	CPEB3	CPEB4	CUL3	CYBB	DNMT1	DNMT3A	EGFR	EP300	FYN	GCLC	GCLM	GLRA1	GLRA2	GRIA1	HMGCS2	HNRNPD	HPCA	HSF1	IPO5	KLF2	KLHL22	LAMTOR1	LAMTOR2	LAMTOR3
GOBP_CELLULAR_RESPONSE_TO_ALCOHOL	https://www.gsea-msigdb.org/gsea/msigdb/human/geneset/GOBP_CELLULAR_RESPONSE_TO_ALCOHOL	ABCA1	ACACA	ACE	ADAM15	ADCY1	ADCY2	ADCY3	ADCY5	ADCY6	ADCY7	ADCY8	AHR	AIFM1	AKAP8	AKR1C2	AKR1C3	AKT1	BLM	BRCA1	CDH1	CDK4	CES1	CFTR	CREB1	CTNNA1	CTNNB1	CYBB	CYP1B1	CYP7A1	DAG1	DEFB104A	DEFB104B	DNMT3A	DYNAP	EFNA5	FBP1	FDX1	FOS	GLRA1	GLRA2	GNAI1	GNB1	GNG2	GOLPH3	GPLD1	GPR155	GRAMD1A	GRAMD1B
GOBP_CELLULAR_RESPONSE_TO_ALDEHYDE	https://www.gsea-msigdb.org/gsea/msigdb/human/geneset/GOBP_CELLULAR_RESPONSE_TO_ALDEHYDE	ACE	ADH4	ADH5	AIFM1	AKR1A1	AKR1B10	ALDH1A1	ESD	IGF1R	PARK7	RDH11	RDH12	SCNN1A	SCNN1B	SCNN1D	SCNN1G	SGK1
GOBP_CELLULAR_RESPONSE_TO_ALDOSTERONE	https://www.gsea-msigdb.org/gsea/msigdb/human/geneset/GOBP_CELLULAR_RESPONSE_TO_ALDOSTERONE	ACE	AIFM1	IGF1R	SCNN1A	SCNN1B	SCNN1D	SCNN1G	SGK1
GOBP_CELLULAR_RESPONSE_TO_ALKALOID	https://www.gsea-msigdb.org/gsea/msigdb/human/geneset/GOBP_CELLULAR_RESPONSE_TO_ALKALOID	ADCY8	BCL2L1	BLM	CACNA1S	CASP3	CASP6	CASP7	CASQ2	CCNA2	CHEK1	CRHBP	EHMT2	GSTM2	HTR1B	MDM2	MECP2	OPRM1	PPP1R1B	PPP1R9B	RAD51	RECQL5	RYR1	RYR2	RYR3	SELENON	SLC1A1	SLC1A2	SLC1A3	SLC34A1	SLC8A1	SPIDR	TGM2	TH	TMEM38A	TMEM38B	TRPV1
GOBP_CELLULAR_RESPONSE_TO_AMMONIUM_ION	https://www.gsea-msigdb.org/gsea/msigdb/human/geneset/GOBP_CELLULAR_RESPONSE_TO_AMMONIUM_ION	ASS1	CPS1	GRIA1	KCNC2	SLC1A1
GOBP_CELLULAR_RESPONSE_TO_AMYLOID_BETA	https://www.gsea-msigdb.org/gsea/msigdb/human/geneset/GOBP_CELLULAR_RESPONSE_TO_AMYLOID_BETA	ABCC1	ADRB2	AGER	APP	ATP1A3	BACE1	BCL2L2	CACNA1A	CACNA2D1	CACNB1	CASP4	CD36	CDK5	EPHA4	EPHB2	FCGR2B	FPR2	FYN	GJA1	GRIN1	GRIN2A	GRM5	GSK3B	ICAM1	IGF1	IGF1R	ITGA4	LGMN	LRP1	MIR106B	MIR140	MIR146A	MIR200A	MIR98	MIRLET7F1	NGFR	NTRK1	PARP1	PRNP	PSEN1	SNX6	TLR4	TLR6	TNF	TREM2	VCAM1
GOBP_CELLULAR_RESPONSE_TO_ANTIBIOTIC	https://www.gsea-msigdb.org/gsea/msigdb/human/geneset/GOBP_CELLULAR_RESPONSE_TO_ANTIBIOTIC	ATP7A	CDKN1B	CRIP1	EZH2	GFER	MDM2	MEF2C	PLA2G4A	PLA2G4F	RPL23	SLC9A1	TP53
GOBP_CELLULAR_RESPONSE_TO_ARSENIC_CONTAINING_SUBSTANCE	https://www.gsea-msigdb.org/gsea/msigdb/human/geneset/GOBP_CELLULAR_RESPONSE_TO_ARSENIC_CONTAINING_SUBSTANCE	CPEB2	DAXX	DDX3X	DHX36	GSTO1	GSTO2	HMOX1	HNRNPA1	HSF1	MAPK13	MKNK2	PPIF	SLC38A2	UROS	VCP	ZC3H12A	ZFAND1	ZFAND2A
GOBP_CELLULAR_RESPONSE_TO_ATP	https://www.gsea-msigdb.org/gsea/msigdb/human/geneset/GOBP_CELLULAR_RESPONSE_TO_ATP	CIB2	HSP90B1	P2RX3	P2RX4	P2RX7	P2RY1	P2RY11	P2RY12	P2RY2	P2RY4	PDXP	PTGS2	RYR3	SSH1	TAF1	TOP2B	TRPM4	TRPV1
GOBP_CELLULAR_RESPONSE_TO_BIOTIC_STIMULUS	https://www.gsea-msigdb.org/gsea/msigdb/human/geneset/GOBP_CELLULAR_RESPONSE_TO_BIOTIC_STIMULUS	ABCA1	ABL1	ACOD1	ADAM9	ADAMTS13	AHR	AICDA	AKAP8	AKT1	ANKRD1	APAF1	ARID5A	ASS1	ATG10	AXL	BCL10	BCR	BMP6	BPI	BTK	CACTIN	CAMP	CAPN2	CARD16	CARD17P	CARD8	CASP1	CASP7	CCDC47	CCL2	CCR5	CD14	CD180	CD274	CD36	CD40	CD55	CD6	CD68	CD80	CD86	CDA	CDC73	CDK19	CDK4	CEBPE	CHMP5	CLEC7A
GOBP_CELLULAR_RESPONSE_TO_BRAIN_DERIVED_NEUROTROPHIC_FACTOR_STIMULUS	https://www.gsea-msigdb.org/gsea/msigdb/human/geneset/GOBP_CELLULAR_RESPONSE_TO_BRAIN_DERIVED_NEUROTROPHIC_FACTOR_STIMULUS	EEF2K	EIF4A3	GRIA1	MAPT	NTRK2	SH3GL2	TMEM108	WASF1
GOBP_CELLULAR_RESPONSE_TO_CADMIUM_ION	https://www.gsea-msigdb.org/gsea/msigdb/human/geneset/GOBP_CELLULAR_RESPONSE_TO_CADMIUM_ION	ABCB6	AKT1	ATP7A	CER1	CHUK	CYBB	CYP1A2	DAXX	EGFR	FOS	HESX1	HMOX1	HSF1	JUN	MAPK1	MAPK3	MAPK8	MAPK9	MMP9	MT1A	MT1B	MT1DP	MT1E	MT1F	MT1G	MT1H	MT1HL1	MT1M	MT1X	MT2A	MT3	MT4	NCF1	OGG1	SLC11A1	SLC39A8	SUMO1
GOBP_CELLULAR_RESPONSE_TO_CAFFEINE	https://www.gsea-msigdb.org/gsea/msigdb/human/geneset/GOBP_CELLULAR_RESPONSE_TO_CAFFEINE	CACNA1S	CASQ2	CHEK1	GSTM2	RYR1	RYR2	RYR3	SELENON	SLC8A1	TMEM38A	TMEM38B
GOBP_CELLULAR_RESPONSE_TO_CALCIUM_ION	https://www.gsea-msigdb.org/gsea/msigdb/human/geneset/GOBP_CELLULAR_RESPONSE_TO_CALCIUM_ION	ACER1	ADCY1	ADCY8	ADD1	ADGRV1	AKR1C3	ALOX15	ALOX5AP	BRAF	CAMK2D	CAPN3	CARF	CHP2	CLIC4	CPNE1	CPNE2	CPNE3	CPNE4	CPNE5	CPNE6	CPNE7	CPNE8	CPNE9	CRHBP	DMTN	DPEP1	ECT2	EDN1	EEF2K	ENSG00000290147	FOS	FOSB	GPLD1	GUCA1A	HPCA	INHBB	IQGAP1	ITPKA	ITPKB	ITPKC	JUNB	JUND	KCNB1	KCNH1	KCNQ3	LCE1D	LGMN	MCOLN1
GOBP_CELLULAR_RESPONSE_TO_CAMP	https://www.gsea-msigdb.org/gsea/msigdb/human/geneset/GOBP_CELLULAR_RESPONSE_TO_CAMP	AANAT	ADIPOQ	AHR	AKAP6	AKAP9	AQP1	AQP8	AQP9	ASS1	CFTR	CPS1	CRHBP	CYP1B1	DMTN	EEF2K	EZR	FBP1	FDX1	GATA1	GPD1	HCN1	HCN2	HCN3	HCN4	IGFBP5	INHBB	INPP5K	ITPR2	KCNE1	KCNQ1	KDM1A	PCK1	PDE2A	PENK	PIK3CG	PKD2	PTAFR	RAP1A	RAP1B	RAP1BL	RAPGEF1	RAPGEF2	RAPGEF3	SLC26A3	SLC26A6	SLC5A5	SRD5A1	STC1
GOBP_CELLULAR_RESPONSE_TO_CARBOHYDRATE_STIMULUS	https://www.gsea-msigdb.org/gsea/msigdb/human/geneset/GOBP_CELLULAR_RESPONSE_TO_CARBOHYDRATE_STIMULUS	ABCA12	ABCC8	ACE	ADCY5	ADCY8	ADRA2A	AGER	ANO1	BAD	BAIAP3	BRSK2	C1QTNF12	C2CD2L	CALCRL	CASR	CCDC186	CDK16	CFTR	CLEC7A	CLTRN	CMA1	COLEC12	CPB2	CYP7A1	EFNA5	ENY2	EPHA5	ERN1	FBP1	FGF21	FKBP1B	FOXA2	GAS6	GATA4	GCG	GCLC	GCLM	GHRL	GJB6	GPER1	GPLD1	GPR27	GPR68	GPX1	HIF1A	HLA-DRB1	ICAM1	IGF1R
GOBP_CELLULAR_RESPONSE_TO_CGMP	https://www.gsea-msigdb.org/gsea/msigdb/human/geneset/GOBP_CELLULAR_RESPONSE_TO_CGMP	HCN2	HCN4	NPR2	PDE2A	PDE3A	RAPGEF2	SLC6A4
GOBP_CELLULAR_RESPONSE_TO_CHEMICAL_STRESS	https://www.gsea-msigdb.org/gsea/msigdb/human/geneset/GOBP_CELLULAR_RESPONSE_TO_CHEMICAL_STRESS	ABCC1	ABCD1	ABL1	ADPRS	AGAP3	AIF1	AIFM1	AIFM2	AKR1B1	AKT1	ALDH3B1	ALOX5	ANKRD2	ANKZF1	ANXA1	APOA4	AQP1	AQP5	ARHGEF2	ARL6IP5	ARNT	ATF2	ATF4	ATG5	ATG7	ATM	ATP13A2	ATP2A2	ATP7A	AXL	BAD	BDKRB2	BECN1	BMAL1	BMP7	BNIP3	BRF2	BTK	CAB39	CAMKK2	CAPN3	CASP1	CASP3	CAT	CAV1	CBX8	CCS	CD36
GOBP_CELLULAR_RESPONSE_TO_CHOLESTEROL	https://www.gsea-msigdb.org/gsea/msigdb/human/geneset/GOBP_CELLULAR_RESPONSE_TO_CHOLESTEROL	ABCA1	CES1	CYP7A1	DAG1	GPLD1	GPR155	GRAMD1A	GRAMD1B	GRAMD1C	INHBA	INHBB	LRP6	LRP8	MIR182	MIR185	MIR96	MLC1	OSBPL7	PTCH1	SMO
GOBP_CELLULAR_RESPONSE_TO_COCAINE	https://www.gsea-msigdb.org/gsea/msigdb/human/geneset/GOBP_CELLULAR_RESPONSE_TO_COCAINE	CCNA2	CRHBP	EHMT2	PPP1R1B	SLC1A1	SLC1A2	SLC1A3	TGM2
GOBP_CELLULAR_RESPONSE_TO_COLD	https://www.gsea-msigdb.org/gsea/msigdb/human/geneset/GOBP_CELLULAR_RESPONSE_TO_COLD	CIDEA	DNAJC3	EIF2AK3	EIF2AK4	FOXO1	NFKBIA	PLIN1	PRKACA	RNF34	SAXO1	SCN11A	SLC9A1	UCP1
GOBP_CELLULAR_RESPONSE_TO_COPPER_ION	https://www.gsea-msigdb.org/gsea/msigdb/human/geneset/GOBP_CELLULAR_RESPONSE_TO_COPPER_ION	AOC1	AQP1	AQP2	ATP7A	BACE1	BECN1	CYP1A1	DAXX	HSF1	MAP1LC3A	MT1A	MT1B	MT1DP	MT1E	MT1F	MT1G	MT1H	MT1HL1	MT1M	MT1X	MT2A	MT3	MT4	NFE2L2	PRNP	SNCA
GOBP_CELLULAR_RESPONSE_TO_CORTICOSTEROID_STIMULUS	https://www.gsea-msigdb.org/gsea/msigdb/human/geneset/GOBP_CELLULAR_RESPONSE_TO_CORTICOSTEROID_STIMULUS	ACE	AIFM1	AKR1C3	ANXA1	AQP1	ASS1	ATP5F1A	AXIN2	BCL2L11	CASP9	CFLAR	CYP1B1	DDIT4	EDN1	EIF4E	FAM107A	FBXO32	FECH	FLT3	GJB2	GPER1	GSK3A	HMGCS2	HNRNPU	IGF1R	ISL1	JAK2	KLF9	METTL21C	MSTN	MT-ND3	MYOD1	NPAS4	NR3C1	PCK1	PCK2	RAN	REST	RPS6KB1	SCNN1A	SCNN1B	SCNN1D	SCNN1G	SERPINF1	SGK1	SMYD3	SRD5A1	SSTR2
GOBP_CELLULAR_RESPONSE_TO_DECREASED_OXYGEN_LEVELS	https://www.gsea-msigdb.org/gsea/msigdb/human/geneset/GOBP_CELLULAR_RESPONSE_TO_DECREASED_OXYGEN_LEVELS	ACAA2	ADAM8	ADO	AIFM1	AJUBA	AK4	AKT1	ANGPT4	AQP1	AQP3	ATF2	ATF4	ATP7A	BAD	BCL2	BMP7	BNIP3	BNIP3L	BRIP1	CASR	CBL	CBS	CCNA2	CDKN1B	CFLAR	CHCHD2	CITED2	CLCA1	CPEB1	CPEB2	CPEB4	CYBB	CYSLTR1	DDAH1	DDR2	DNMT3A	DRD2	EDN1	EEF2K	EGLN1	EGLN2	EGLN3	EGR1	ENO1	ENSG00000274276	EPAS1	EPHA4	ERO1A
GOBP_CELLULAR_RESPONSE_TO_DEXAMETHASONE_STIMULUS	https://www.gsea-msigdb.org/gsea/msigdb/human/geneset/GOBP_CELLULAR_RESPONSE_TO_DEXAMETHASONE_STIMULUS	AQP1	ASS1	ATP5F1A	AXIN2	CASP9	CFLAR	DDIT4	EIF4E	FBXO32	FECH	GJB2	IGF1R	JAK2	METTL21C	MSTN	NR3C1	PCK1	PCK2	RPS6KB1	SERPINF1	SMYD3	SRD5A1	TFAP4	USP8
GOBP_CELLULAR_RESPONSE_TO_DSRNA	https://www.gsea-msigdb.org/gsea/msigdb/human/geneset/GOBP_CELLULAR_RESPONSE_TO_DSRNA	CAV1	CGAS	COLEC12	DHX9	FLOT1	GRIA1	IFIH1	IFIT1	IFNB1	IRF3	MAVS	MUL1	NFKB1	NPM1	P2RX7	PDE12	PQBP1	RALB	RIGI	RIOK3	STING1	TLR3	ZCCHC3
GOBP_CELLULAR_RESPONSE_TO_ELECTRICAL_STIMULUS	https://www.gsea-msigdb.org/gsea/msigdb/human/geneset/GOBP_CELLULAR_RESPONSE_TO_ELECTRICAL_STIMULUS	ADSS1	ADSS2	CALR	GNAT1	GRM1	HPCA	NEUROD2	NSMF	PALM	PTEN	REST	RPE65	SLC9A1
GOBP_CELLULAR_RESPONSE_TO_EPINEPHRINE_STIMULUS	https://www.gsea-msigdb.org/gsea/msigdb/human/geneset/GOBP_CELLULAR_RESPONSE_TO_EPINEPHRINE_STIMULUS	ADIPOQ	ATP2B4	KCNQ1	PDE4B	PKLR	PRKACA	RYR2	SIRT2	SLC9A1	SNCA	SRD5A1
GOBP_CELLULAR_RESPONSE_TO_ESTRADIOL_STIMULUS	https://www.gsea-msigdb.org/gsea/msigdb/human/geneset/GOBP_CELLULAR_RESPONSE_TO_ESTRADIOL_STIMULUS	AIFM1	BCL2L2	CCDC62	CCNA2	CFLAR	CRHBP	EGFR	ESR1	ESR2	FAM210B	GPER1	H2AZ1	HNRNPD	HSF1	IGF1R	IL10	ITGA2	KAT5	KIF18A	LCOR	MMP2	MSX2	MYOD1	MYOG	NCOA3	NRIP1	POU4F1	POU4F2	PPP1R9B	RAMP3	RUVBL2	SFRP1	SRD5A1	SSTR1	SSTR2	SSTR3	UGT1A1	ZNF703
GOBP_CELLULAR_RESPONSE_TO_ESTROGEN_STIMULUS	https://www.gsea-msigdb.org/gsea/msigdb/human/geneset/GOBP_CELLULAR_RESPONSE_TO_ESTROGEN_STIMULUS	AR	ARID5A	BCAS3	CRHBP	ESR1	ESR2	MDM2	MIR493	NCOA4	OCSTAMP	PELP1	RARA	SERPINB9	SFR1	SFRP1	SP1	SRA1	TRIM24	WBP2
GOBP_CELLULAR_RESPONSE_TO_ETHANOL	https://www.gsea-msigdb.org/gsea/msigdb/human/geneset/GOBP_CELLULAR_RESPONSE_TO_ETHANOL	ADCY7	CYBB	DNMT3A	GLRA1	GLRA2	ITPR2	KCNMB1	PRKAA1	PRKCE	SLC23A2	SOD2	TP53INP1	UGT1A1
GOBP_CELLULAR_RESPONSE_TO_ETHER	https://www.gsea-msigdb.org/gsea/msigdb/human/geneset/GOBP_CELLULAR_RESPONSE_TO_ETHER	CDK4	GOLPH3	LARP1	PLCB1	PTAFR	ZC3H12A
GOBP_CELLULAR_RESPONSE_TO_EXOGENOUS_DSRNA	https://www.gsea-msigdb.org/gsea/msigdb/human/geneset/GOBP_CELLULAR_RESPONSE_TO_EXOGENOUS_DSRNA	CAV1	CGAS	COLEC12	DHX9	FLOT1	IFIH1	IFIT1	IFNB1	IRF3	MAVS	MUL1	PQBP1	RALB	RIGI	STING1	TLR3	ZCCHC3
GOBP_CELLULAR_RESPONSE_TO_EXTERNAL_STIMULUS	https://www.gsea-msigdb.org/gsea/msigdb/human/geneset/GOBP_CELLULAR_RESPONSE_TO_EXTERNAL_STIMULUS	ADNP	ADORA2B	AIFM1	AKR1C3	ALB	AMBRA1	ANKRD1	AOC1	AQP1	AQP2	AQP3	ARHGAP35	ASGR1	ASNS	ATF2	ATF3	ATF4	ATG14	ATG5	ATG7	ATP1A2	ATXN3	AVPR1A	AXL	BAD	BAG3	BAK1	BCL10	BCL2	BECN1	BECN2	BGLAP	BHLHA15	BMP6	BMPR2	BMT2	BNIP3	BRIP1	CARTPT	CASP1	CASP2	CASP5	CASP8	CASP8AP2	CASR	CASTOR1	CBL	CBS
GOBP_CELLULAR_RESPONSE_TO_EXTRACELLULAR_STIMULUS	https://www.gsea-msigdb.org/gsea/msigdb/human/geneset/GOBP_CELLULAR_RESPONSE_TO_EXTRACELLULAR_STIMULUS	ADNP	ADORA2B	AIFM1	AKR1C3	ALB	AMBRA1	AOC1	AQP2	AQP3	ARHGAP35	ASGR1	ASNS	ATF2	ATF3	ATF4	ATG14	ATG5	ATG7	ATXN3	AVPR1A	AXL	BCL2	BECN1	BECN2	BGLAP	BHLHA15	BMPR2	BMT2	BRIP1	CARTPT	CASR	CASTOR1	CBL	CBS	CD68	CDKN1A	CDKN2B	CLEC16A	COL1A1	COMT	CPEB4	CREBBP	CSNK1A1	CTSK	CYP24A1	CYP27B1	CYSLTR1	DAP
GOBP_CELLULAR_RESPONSE_TO_FATTY_ACID	https://www.gsea-msigdb.org/gsea/msigdb/human/geneset/GOBP_CELLULAR_RESPONSE_TO_FATTY_ACID	AKR1C1	AKR1C2	AKR1C3	AKR1C4	ASS1	CDK4	CLDN1	CPS1	CPT1A	DGAT2	EDN1	FFAR2	FFAR3	HES1	HMGCS2	ID3	IRS1	KCNK4	LDLR	LPL	MIR92A1	NR1H4	OR51E2	PDK3	PDK4	PID1	PLCB1	PTAFR	SMARCD1	SRC	SREBF1	UCP1	XRCC5	ZC3H12A
GOBP_CELLULAR_RESPONSE_TO_FLUID_SHEAR_STRESS	https://www.gsea-msigdb.org/gsea/msigdb/human/geneset/GOBP_CELLULAR_RESPONSE_TO_FLUID_SHEAR_STRESS	ASS1	HAS2	HDAC3	KLF2	KLF4	MAP2K5	MAPK7	MEF2C	MIR126	MIR92A1	MMP2	MTSS1	NFE2L2	PKD2	PLEC	PTGS2	PTK2B	SOCS5	SRC	SREBF2	TFPI2
GOBP_CELLULAR_RESPONSE_TO_FOLLICLE_STIMULATING_HORMONE_STIMULUS	https://www.gsea-msigdb.org/gsea/msigdb/human/geneset/GOBP_CELLULAR_RESPONSE_TO_FOLLICLE_STIMULATING_HORMONE_STIMULUS	EDN1	EDNRA	EFNA5	EPHA8	FSHR	GATA1	GCLC	GCLM	INHBA	NOTCH1
GOBP_CELLULAR_RESPONSE_TO_GAMMA_RADIATION	https://www.gsea-msigdb.org/gsea/msigdb/human/geneset/GOBP_CELLULAR_RESPONSE_TO_GAMMA_RADIATION	ATM	ATR	BCL2L1	CDKN1A	CHEK2	CRYAB	EGR1	ELK1	GTF2H5	H2AX	HRAS	HSF1	KDM1A	MAP3K20	MDM2	MIR21	RPL26	TLK2	TMEM109	TP53	TREX1	TSPYL5	WRN	XRCC5	XRCC6	YAP1	ZMPSTE24
GOBP_CELLULAR_RESPONSE_TO_GLUCAGON_STIMULUS	https://www.gsea-msigdb.org/gsea/msigdb/human/geneset/GOBP_CELLULAR_RESPONSE_TO_GLUCAGON_STIMULUS	ADCY8	ASS1	CPS1	FGF21	GCG	GCGR	GJB2	GLP1R	GLP2R	PCK1	PRKACA	PRKAR1A
GOBP_CELLULAR_RESPONSE_TO_GLUCOCORTICOID_STIMULUS	https://www.gsea-msigdb.org/gsea/msigdb/human/geneset/GOBP_CELLULAR_RESPONSE_TO_GLUCOCORTICOID_STIMULUS	ANXA1	AQP1	ASS1	ATP5F1A	AXIN2	BCL2L11	CASP9	CFLAR	CYP1B1	DDIT4	EDN1	EIF4E	FAM107A	FBXO32	FECH	FLT3	GJB2	GSK3A	HMGCS2	HNRNPU	IGF1R	ISL1	JAK2	KLF9	METTL21C	MSTN	MT-ND3	MYOD1	NPAS4	NR3C1	PCK1	PCK2	REST	RPS6KB1	SERPINF1	SMYD3	SRD5A1	SSTR2	SSTR3	SSTR4	SSTR5	STC1	TFAP4	UBE2L3	UGT1A1	USP8	ZFP36	ZFP36L1
GOBP_CELLULAR_RESPONSE_TO_GLUCOSE_STARVATION	https://www.gsea-msigdb.org/gsea/msigdb/human/geneset/GOBP_CELLULAR_RESPONSE_TO_GLUCOSE_STARVATION	ASNS	ATF4	ATG14	BCL2	BECN1	BHLHA15	CPEB4	EIF2AK3	FOXO3	HNRNPA1	HSPA5	IFI16	ITFG2	KAT5	KICS2	KPTN	MTMR3	MYBBP1A	NFE2L2	NUAK1	NUAK2	PICK1	PIK3C3	PIK3R4	PLIN2	PLIN3	PMAIP1	PRKAA1	PRKAA2	RRP8	SESN1	SESN2	SESN3	SH3GLB1	SIRT1	SLC2A1	SLC7A5	SUV39H1	SZT2	TBL2	TP53	TSSK1B	TSSK2	TSSK3	TSSK6	UPP1	XBP1	YWHAG
GOBP_CELLULAR_RESPONSE_TO_GONADOTROPIN_RELEASING_HORMONE	https://www.gsea-msigdb.org/gsea/msigdb/human/geneset/GOBP_CELLULAR_RESPONSE_TO_GONADOTROPIN_RELEASING_HORMONE	CRHBP	GNRHR	GNRHR2	GPR173	MGARP	UMODL1
GOBP_CELLULAR_RESPONSE_TO_GONADOTROPIN_STIMULUS	https://www.gsea-msigdb.org/gsea/msigdb/human/geneset/GOBP_CELLULAR_RESPONSE_TO_GONADOTROPIN_STIMULUS	CCNA2	CYP1B1	EDN1	EDNRA	EFNA5	EPHA8	FSHR	GATA1	GATA6	GCLC	GCLM	INHBA	LHCGR	NOTCH1	NSMF	PAX8	SLC5A5	WT1
GOBP_CELLULAR_RESPONSE_TO_GROWTH_HORMONE_STIMULUS	https://www.gsea-msigdb.org/gsea/msigdb/human/geneset/GOBP_CELLULAR_RESPONSE_TO_GROWTH_HORMONE_STIMULUS	CSH1	CSH2	CSHL1	GDF15	GH1	GH2	GHR	GHRL	JAK1	JAK2	JAK3	LEPROT	LEPROTL1	LYN	MBD5	PIK3R1	PTK2	PTPN1	PXN	SHOC2	SOCS2	STAT3	STAT5A	STAT5B	STAT6	TYK2
GOBP_CELLULAR_RESPONSE_TO_HEAT	https://www.gsea-msigdb.org/gsea/msigdb/human/geneset/GOBP_CELLULAR_RESPONSE_TO_HEAT	ANO1	ATM	ATR	ATXN3	BAG3	CDKN1A	CETN1	CHORDC1	CLPB	CREBBP	CXCL10	DAXX	DHX36	DNAJB1	DNAJB6	DNAJC2	DNAJC7	EIF2S1	EP300	FGF1	GSK3B	HDAC2	HIKESHI	HMOX1	HSBP1	HSBP1L1	HSF1	HSP90AA1	HSP90AA2P	HSP90AA4P	HSP90AB1	HSP90AB2P	HSP90AB3P	HSP90AB4P	HSPA1A	HSPA1B	HSPA6	HTRA2	IER5	IL1A	IRAK1	LYN	MAPKAPK2	MAPT	MTOR	NF1	PDCD6	PRKACA
GOBP_CELLULAR_RESPONSE_TO_HEPARIN	https://www.gsea-msigdb.org/gsea/msigdb/human/geneset/GOBP_CELLULAR_RESPONSE_TO_HEPARIN	AOC1	EGR1	SFRP1	SLIT2	SOX9
GOBP_CELLULAR_RESPONSE_TO_HISTAMINE	https://www.gsea-msigdb.org/gsea/msigdb/human/geneset/GOBP_CELLULAR_RESPONSE_TO_HISTAMINE	AOC1	DIAPH1	GABRB1	GABRB2	GABRB3	GABRG2	HRH1
GOBP_CELLULAR_RESPONSE_TO_HORMONE_STIMULUS	https://www.gsea-msigdb.org/gsea/msigdb/human/geneset/GOBP_CELLULAR_RESPONSE_TO_HORMONE_STIMULUS	ABHD2	ACACA	ACE	ACOD1	ACSL1	ACTN2	ADCY6	ADCY8	ADIPOQ	ADIPOR1	ADIPOR2	ADRA2A	ADTRP	AGRP	AGT	AGTR1	AGTR2	AGTRAP	AHCYL1	AHSG	AIFM1	AKAP8	AKR1C1	AKR1C2	AKR1C3	AKR1C4	AKT1	AKT2	ANXA1	AP3S1	APPL1	APPL2	AQP1	AR	ARID1A	ARID1B	ARID5A	ASIP	ASS1	ATP1A1	ATP1A2	ATP1A3	ATP2B1	ATP5F1A	AVPR1A	AVPR1B	AVPR2	AXIN2
GOBP_CELLULAR_RESPONSE_TO_HYDROGEN_PEROXIDE	https://www.gsea-msigdb.org/gsea/msigdb/human/geneset/GOBP_CELLULAR_RESPONSE_TO_HYDROGEN_PEROXIDE	ABL1	AIFM1	ANKZF1	ANXA1	AQP1	AXL	BECN1	BNIP3	CAT	CBX8	CDK1	CYP1B1	ECT2	EDN1	ERN1	EZH2	FABP1	FXN	FYN	HDAC2	HDAC6	HSF1	IL18BP	IL18RAP	IL6	KDM6B	KLF2	MAP1LC3A	MAP3K5	MAPK13	MAPK7	MDM2	MIR103A1	MIR107	MYB	NET1	NFE2L2	NQO1	OSER1	PARK7	PAX2	PCGF2	PCNA	PDGFD	PLEKHA1	PPIF	PRKAA1	PRKCD
GOBP_CELLULAR_RESPONSE_TO_HYDROPEROXIDE	https://www.gsea-msigdb.org/gsea/msigdb/human/geneset/GOBP_CELLULAR_RESPONSE_TO_HYDROPEROXIDE	CD36	DAPK1	MGST1	OXR1	PRKCD	PRKD1	TMIGD1	TP53INP1
GOBP_CELLULAR_RESPONSE_TO_HYPEROXIA	https://www.gsea-msigdb.org/gsea/msigdb/human/geneset/GOBP_CELLULAR_RESPONSE_TO_HYPEROXIA	ATG7	CAV1	FAS	FOXO1	NOX1
GOBP_CELLULAR_RESPONSE_TO_INCREASED_OXYGEN_LEVELS	https://www.gsea-msigdb.org/gsea/msigdb/human/geneset/GOBP_CELLULAR_RESPONSE_TO_INCREASED_OXYGEN_LEVELS	ATG7	ATP6AP1	ATP6V0A2	ATP6V0D1	ATP6V1A	ATP6V1G1	CAV1	CCDC115	FAS	FOXO1	NOX1	TMEM199
GOBP_CELLULAR_RESPONSE_TO_INDOLE_3_METHANOL	https://www.gsea-msigdb.org/gsea/msigdb/human/geneset/GOBP_CELLULAR_RESPONSE_TO_INDOLE_3_METHANOL	BRCA1	CDH1	CTNNA1	CTNNB1	JUP
GOBP_CELLULAR_RESPONSE_TO_INORGANIC_SUBSTANCE	https://www.gsea-msigdb.org/gsea/msigdb/human/geneset/GOBP_CELLULAR_RESPONSE_TO_INORGANIC_SUBSTANCE	ABCB6	ACER1	ADCY1	ADCY10	ADCY7	ADCY8	ADD1	ADGRV1	AIFM1	AKR1C3	AKT1	ALAD	ALOX15	ALOX5AP	ANK3	AOC1	AQP1	AQP2	ATF4	ATP13A2	ATP5F1A	ATP7A	ATRX	B2M	BACE1	BECN1	BLM	BMP6	BNIP3	BRAF	CACNA1H	CALR	CAMK2D	CAPN3	CARF	CCNA2	CDH1	CDK2	CDKN1B	CEBPA	CER1	CFLAR	CHP2	CHUK	CLDN1	CLIC4	CPNE1	CPNE2
GOBP_CELLULAR_RESPONSE_TO_INSULIN_LIKE_GROWTH_FACTOR_STIMULUS	https://www.gsea-msigdb.org/gsea/msigdb/human/geneset/GOBP_CELLULAR_RESPONSE_TO_INSULIN_LIKE_GROWTH_FACTOR_STIMULUS	CCNA2	CRK	FBN1	GHSR	IGF1R	ITGB3	SLC25A33	SYAP1
GOBP_CELLULAR_RESPONSE_TO_INSULIN_STIMULUS	https://www.gsea-msigdb.org/gsea/msigdb/human/geneset/GOBP_CELLULAR_RESPONSE_TO_INSULIN_STIMULUS	ADIPOQ	ADIPOR1	AHSG	AKT1	AKT2	AP3S1	APPL1	APPL2	ATP2B1	BAIAP2	BCAR1	BCAR3	BGLAP	C1QTNF12	C2CD5	CAPN10	CAV2	CEACAM1	CFLAR	CPEB1	CPEB2	CSRP3	CTSD	CYFIP1	DENND4C	DNAI1	ECHDC3	EEF2K	EIF4EBP2	ENPP1	EPRS1	ERFE	FBP1	FER	FFAR3	FOXC2	FOXO1	FOXO4	FUT7	GAB1	GCK	GCLC	GHR	GHRHR	GHSR	GKAP1	GNAI2	GOT1
GOBP_CELLULAR_RESPONSE_TO_INTERFERON_ALPHA	https://www.gsea-msigdb.org/gsea/msigdb/human/geneset/GOBP_CELLULAR_RESPONSE_TO_INTERFERON_ALPHA	AXL	GAS6	GATA3	IFNAR1	PDE12	PYHIN1	RO60	TPR
GOBP_CELLULAR_RESPONSE_TO_INTERFERON_BETA	https://www.gsea-msigdb.org/gsea/msigdb/human/geneset/GOBP_CELLULAR_RESPONSE_TO_INTERFERON_BETA	ACOD1	AIM2	CALM1	CAMK2A	CAPN2	CDC34	HTRA2	IFI16	IFITM2	IFNAR1	IFNAR2	IFNB1	IRF1	IRGM	MNDA	NDUFA13	OAS1	PNPT1	PYDC5	PYHIN1	STAT1	STING1	TLR3	TREX1	TRIM6	UBE2G2	UBE2K
GOBP_CELLULAR_RESPONSE_TO_INTERLEUKIN_1	https://www.gsea-msigdb.org/gsea/msigdb/human/geneset/GOBP_CELLULAR_RESPONSE_TO_INTERLEUKIN_1	ACOD1	ADAMTS12	ADAMTS7	AKAP12	ANKRD1	CACTIN	CAMP	CCL1	CCL11	CCL13	CCL14	CCL15	CCL16	CCL17	CCL18	CCL19	CCL2	CCL20	CCL21	CCL22	CCL23	CCL24	CCL25	CCL26	CCL3	CCL3L1	CCL3L3	CCL4	CCL5	CCL7	CCL8	CD40	CD47	CX3CL1	CXCL8	DAB2IP	EDN1	EGR1	FGB	FGG	GBP1	GBP2	GBP3	HAS2	HES1	HIF1A	HYAL1	HYAL2
GOBP_CELLULAR_RESPONSE_TO_IONIZING_RADIATION	https://www.gsea-msigdb.org/gsea/msigdb/human/geneset/GOBP_CELLULAR_RESPONSE_TO_IONIZING_RADIATION	ATM	ATR	BABAM2	BARD1	BCL2L1	BLM	BRCA1	BRCA2	BRCC3	CCND2	CDKN1A	CHEK2	CLOCK	CRYAB	ECT2	EEF1D	EGR1	ELK1	FBXO4	FIGNL1	GADD45A	GATA3	GRB2	GTF2H5	H2AX	HRAS	HSF1	HUS1	IFI16	INO80	INTS7	ITGB6	KDM1A	KDM4D	LIG4	MAP3K20	MAPK14	MDM2	MIR21	NET1	NIPBL	NUCKS1	PRAP1	RAD1	RAD51	RAD51AP1	RAD9A	RAD9B
GOBP_CELLULAR_RESPONSE_TO_IRON_ION	https://www.gsea-msigdb.org/gsea/msigdb/human/geneset/GOBP_CELLULAR_RESPONSE_TO_IRON_ION	ATP7A	B2M	BMP6	HFE	HMOX1	SLC40A1	TF	TFAP2A	TFR2
GOBP_CELLULAR_RESPONSE_TO_KETONE	https://www.gsea-msigdb.org/gsea/msigdb/human/geneset/GOBP_CELLULAR_RESPONSE_TO_KETONE	ACACA	ACE	ACOD1	ADAM15	ADCY1	ADCY2	ADCY3	ADCY5	ADCY6	ADCY8	AHR	AIFM1	AKAP8	AKR1C2	AKR1C3	AKT1	AQP1	AR	ASS1	ATP5F1A	AXIN2	CASP9	CDK4	CFLAR	CFTR	CREB1	CYP1B1	DDIT4	DEFB104A	DEFB104B	EFNA5	EIF4E	ELK1	FBP1	FBXO32	FDX1	FECH	FOS	GAS6	GJB2	GNAI1	GNB1	GNG2	GOLPH3	IGF1R	JAK2	KLF2	KLF9
GOBP_CELLULAR_RESPONSE_TO_LAMINAR_FLUID_SHEAR_STRESS	https://www.gsea-msigdb.org/gsea/msigdb/human/geneset/GOBP_CELLULAR_RESPONSE_TO_LAMINAR_FLUID_SHEAR_STRESS	ASS1	KLF2	KLF4	MAP2K5	MAPK7	MIR126	NFE2L2	SREBF2
GOBP_CELLULAR_RESPONSE_TO_LEAD_ION	https://www.gsea-msigdb.org/gsea/msigdb/human/geneset/GOBP_CELLULAR_RESPONSE_TO_LEAD_ION	ALAD	ATP7A	CLDN1	PTGS2	UCP2
GOBP_CELLULAR_RESPONSE_TO_LEPTIN_STIMULUS	https://www.gsea-msigdb.org/gsea/msigdb/human/geneset/GOBP_CELLULAR_RESPONSE_TO_LEPTIN_STIMULUS	ADIPOR1	BBS2	BBS4	CCNA2	FGB	FGF23	GCK	INHBB	LEP	LEPR	MKKS	MT3	NR4A3	PID1	SIRT1	STAT3	UGCG
GOBP_CELLULAR_RESPONSE_TO_LEUCINE	https://www.gsea-msigdb.org/gsea/msigdb/human/geneset/GOBP_CELLULAR_RESPONSE_TO_LEUCINE	EP300	KLHL22	LARS1	MTOR	RPTOR	RRAGD	SESN1	SESN2	SESN3	STAMBPL1	UBR1	UBR2
GOBP_CELLULAR_RESPONSE_TO_LEUCINE_STARVATION	https://www.gsea-msigdb.org/gsea/msigdb/human/geneset/GOBP_CELLULAR_RESPONSE_TO_LEUCINE_STARVATION	ATF2	ATF4	EIF2AK4	GCN1	IMPACT	LARS1	MTOR	RNF167	RRAGB	RRAGD	SESN1	SESN2	SESN3
GOBP_CELLULAR_RESPONSE_TO_LIGHT_STIMULUS	https://www.gsea-msigdb.org/gsea/msigdb/human/geneset/GOBP_CELLULAR_RESPONSE_TO_LIGHT_STIMULUS	ACTR5	AIPL1	AKT2	AQP1	ATF4	ATR	AURKB	BAK1	BAX	BMF	CAMKMT	CASP9	CDC25A	CDKN1A	CERS1	COPS9	CRB1	CREBBP	CRIP1	CRY1	CRY2	CUL4A	CUL4B	DDB1	DDB2	DHX36	EIF2AK4	EIF2S1	EP300	ERCC1	ERCC4	GNAT1	GNB5	GPR52	GPR88	GRK1	GRK4	GRK7	GUCY2D	GUCY2F	H2AC25	HYAL1	HYAL2	HYAL3	INO80	KCNE1	KDM1A	MAP3K20
GOBP_CELLULAR_RESPONSE_TO_LIPID	https://www.gsea-msigdb.org/gsea/msigdb/human/geneset/GOBP_CELLULAR_RESPONSE_TO_LIPID	ABCA1	ABCB4	ABHD2	ABL1	ABL2	ACACA	ACE	ACOD1	ADAM15	ADAM9	ADAMTS13	ADCY1	ADCY2	ADCY3	ADCY5	ADCY6	ADCY8	ADTRP	AHR	AICDA	AIFM1	AKAP8	AKR1C1	AKR1C2	AKR1C3	AKR1C4	AKT1	ALDH1A2	ANKRD1	ANXA1	AQP1	AR	ARID1A	ARID5A	ASS1	ATM	ATP1A1	ATP1A2	ATP1A3	ATP5F1A	AXIN2	AXL	BAD	BCL10	BCL2L11	BCL2L2	BCR	BGLAP
GOBP_CELLULAR_RESPONSE_TO_LIPOPROTEIN_PARTICLE_STIMULUS	https://www.gsea-msigdb.org/gsea/msigdb/human/geneset/GOBP_CELLULAR_RESPONSE_TO_LIPOPROTEIN_PARTICLE_STIMULUS	ABCA1	ABCG1	ABCG4	ADAM17	ADTRP	AKT1	APOE	CASR	CD36	CD68	CD81	CD9	CDH13	CES1	FCER1G	FGF21	GAS5	ITGB1	ITGB2	LDLR	LPL	MIA3	MIR135A1	MIR146A	MIR20A	MIR302A	MIR4286	MIR758	MIR92A1	MYD88	NPC1	PPARG	SMPD3	SOCS5	SREBF2	SYK	TGFB1	TICAM1	TLR4	TLR6	TREM2	TXNIP
GOBP_CELLULAR_RESPONSE_TO_LUTEINIZING_HORMONE_STIMULUS	https://www.gsea-msigdb.org/gsea/msigdb/human/geneset/GOBP_CELLULAR_RESPONSE_TO_LUTEINIZING_HORMONE_STIMULUS	CCNA2	CYP1B1	EDN1	EDNRA	LHCGR
GOBP_CELLULAR_RESPONSE_TO_L_GLUTAMATE	https://www.gsea-msigdb.org/gsea/msigdb/human/geneset/GOBP_CELLULAR_RESPONSE_TO_L_GLUTAMATE	AMIGO1	BAIAP2	BCL11A	FYN	HPCA
GOBP_CELLULAR_RESPONSE_TO_MACROPHAGE_COLONY_STIMULATING_FACTOR_STIMULUS	https://www.gsea-msigdb.org/gsea/msigdb/human/geneset/GOBP_CELLULAR_RESPONSE_TO_MACROPHAGE_COLONY_STIMULATING_FACTOR_STIMULUS	CSF1	CSF1R	DCSTAMP	DOK1	FER	MST1R	PDE1B	PDE2A	PTPN2	STAP1	TLR2	TLR4	TREM2
GOBP_CELLULAR_RESPONSE_TO_MAGNESIUM_ION	https://www.gsea-msigdb.org/gsea/msigdb/human/geneset/GOBP_CELLULAR_RESPONSE_TO_MAGNESIUM_ION	ANK3	FBP1	KCNA1	RYR3	SLC41A1	SLFN14	SMPD3
GOBP_CELLULAR_RESPONSE_TO_MANGANESE_ION	https://www.gsea-msigdb.org/gsea/msigdb/human/geneset/GOBP_CELLULAR_RESPONSE_TO_MANGANESE_ION	ATF4	ATP13A2	BACE1	EIF2AK3	EIF2S1	HSP90B1	LRRK2	PRKN	SLFN14	TH
GOBP_CELLULAR_RESPONSE_TO_MECHANICAL_STIMULUS	https://www.gsea-msigdb.org/gsea/msigdb/human/geneset/GOBP_CELLULAR_RESPONSE_TO_MECHANICAL_STIMULUS	ANKRD1	AQP1	ATP1A2	BAD	BAG3	BAK1	BCL10	BMP6	BNIP3	CASP1	CASP2	CASP5	CASP8	CASP8AP2	CD40	CHEK1	CNN2	COL1A1	CRADD	DAG1	ENG	F11R	FADD	FAS	FGF2	GADD45A	GCLC	HABP4	IGF1R	IL13	IL1B	IL33	IRF1	ITGA2	ITGB3	KCNJ2	KCNK4	LTBR	MAG	MAP2K4	MAP3K1	MAP3K14	MAP3K2	MAPK3	MAPK8	MTPN	MYD88	NFKB1
GOBP_CELLULAR_RESPONSE_TO_MINERALOCORTICOID_STIMULUS	https://www.gsea-msigdb.org/gsea/msigdb/human/geneset/GOBP_CELLULAR_RESPONSE_TO_MINERALOCORTICOID_STIMULUS	ACE	AIFM1	EDN1	GPER1	IGF1R	NPAS4	RAN	SCNN1A	SCNN1B	SCNN1D	SCNN1G	SGK1
GOBP_CELLULAR_RESPONSE_TO_MURAMYL_DIPEPTIDE	https://www.gsea-msigdb.org/gsea/msigdb/human/geneset/GOBP_CELLULAR_RESPONSE_TO_MURAMYL_DIPEPTIDE	ARHGEF2	CHMP5	LDOC1	NOD1	NOD2	PTPN22	RIPK2	TRIM41	VIM
GOBP_CELLULAR_RESPONSE_TO_NICOTINE	https://www.gsea-msigdb.org/gsea/msigdb/human/geneset/GOBP_CELLULAR_RESPONSE_TO_NICOTINE	B2M	BAD	CHRNA2	NFKB1	NTRK1	RELA	TH	TNF
GOBP_CELLULAR_RESPONSE_TO_NITROGEN_COMPOUND	https://www.gsea-msigdb.org/gsea/msigdb/human/geneset/GOBP_CELLULAR_RESPONSE_TO_NITROGEN_COMPOUND	AANAT	ABCC1	ABL1	ACHE	ACTA1	ACTB	ACTN2	ADCY5	ADCY6	ADCY8	ADIPOQ	ADIPOR1	ADRB2	AGER	AGRN	AGT	AGTR1	AGTR2	AGTRAP	AHCYL1	AHR	AHSG	AIFM1	AKAP6	AKAP9	AKT1	AKT2	ALK	AMIGO1	ANO1	AOC1	AP3S1	APLP1	APP	APPL1	APPL2	AQP1	AQP8	AQP9	ARHGEF2	ARID1B	ARRB2	ASS1	ATF2	ATP1A3	ATP2B1	ATP2B4	ATP5F1A
GOBP_CELLULAR_RESPONSE_TO_NITROGEN_STARVATION	https://www.gsea-msigdb.org/gsea/msigdb/human/geneset/GOBP_CELLULAR_RESPONSE_TO_NITROGEN_STARVATION	ATG5	ATG7	BECN1	BECN2	GABARAP	GABARAPL1	GABARAPL2	GABARAPL3	MAP1LC3A	MAP1LC3B	MAP1LC3B2	MAP1LC3C
GOBP_CELLULAR_RESPONSE_TO_NITROSATIVE_STRESS	https://www.gsea-msigdb.org/gsea/msigdb/human/geneset/GOBP_CELLULAR_RESPONSE_TO_NITROSATIVE_STRESS	ATG5	ATM	DDIT3	DNAJA1	PARK7	STOX1
GOBP_CELLULAR_RESPONSE_TO_NUTRIENT	https://www.gsea-msigdb.org/gsea/msigdb/human/geneset/GOBP_CELLULAR_RESPONSE_TO_NUTRIENT	BGLAP	BMT2	BRIP1	CASR	CDKN2B	COL1A1	CSNK1A1	CYP24A1	CYP27B1	FES	FGF23	FOLR1	FOLR2	FOXA2	GAS6	GDAP1	KANK2	KAT2B	LEP	LPL	MDM2	MED1	MIR125B1	MLXIPL	MN1	MTOR	NCOA1	NR1H4	OGT	PDK2	PENK	PHEX	PIM1	PLD1	POSTN	RPS6KB1	RXRA	RXRB	SFRP1	SNAI2	SNW1	SRF	TNC	TRIM24	USF1	USF2	VDR	XBP1
GOBP_CELLULAR_RESPONSE_TO_ORGANIC_CYCLIC_COMPOUND	https://www.gsea-msigdb.org/gsea/msigdb/human/geneset/GOBP_CELLULAR_RESPONSE_TO_ORGANIC_CYCLIC_COMPOUND	AANAT	ABCA1	ABCB4	ABHD2	ABL1	ACE	ACOD1	ACTB	ADCY1	ADCY2	ADCY3	ADCY5	ADCY6	ADCY8	ADIPOQ	ADTRP	AHR	AIFM1	AKAP6	AKAP9	AKR1C3	ALK	ALPL	ANXA1	AOC1	APLP1	AQP1	AQP8	AQP9	AR	ARID1A	ARL6IP5	ARRB2	ASS1	ATP1A1	ATP1A2	ATP1A3	ATP2B4	ATP5F1A	AXIN2	BCL2L11	BCL2L2	BGLAP	BLM	BMAL1	BMP2	BRCA1	BTRC
GOBP_CELLULAR_RESPONSE_TO_OSMOTIC_STRESS	https://www.gsea-msigdb.org/gsea/msigdb/human/geneset/GOBP_CELLULAR_RESPONSE_TO_OSMOTIC_STRESS	AKR1B1	AQP1	AQP5	ARHGEF2	BAD	BDKRB2	CAB39	CAPN3	CASP1	CASP3	CLN3	DDX3X	EFHD1	EPO	FBP1	LETM1	LRRC8C	LRRC8D	LRRC8E	MICU1	MLST8	MTOR	MYLK	NFAT5	NLK	NLRP3	OXSR1	PCK1	PKD2	PTGS2	PYCARD	RCSD1	RELB	RPTOR	SCN2A	SERPINB6	SLC12A6	SLC25A23	SLC2A1	SLC2A4	SLC4A11	STK39	TIFAB	TRPV4	TSPO	USP15	WNK1	WNK3
GOBP_CELLULAR_RESPONSE_TO_OXIDATIVE_STRESS	https://www.gsea-msigdb.org/gsea/msigdb/human/geneset/GOBP_CELLULAR_RESPONSE_TO_OXIDATIVE_STRESS	ABCC1	ABCD1	ABL1	ADPRS	AGAP3	AIF1	AIFM1	AIFM2	AKT1	ALDH3B1	ALOX5	ANKRD2	ANKZF1	ANXA1	APOA4	AQP1	ARL6IP5	ARNT	ATF2	ATF4	ATM	ATP13A2	ATP2A2	ATP7A	AXL	BECN1	BMAL1	BMP7	BNIP3	BRF2	BTK	CAMKK2	CAT	CBX8	CCS	CD36	CDK1	CHCHD2	CHUK	CPEB2	CRYGD	CYP1B1	DAPK1	DDR2	DHFR	DHFRP1	DHRS2	ECT2
GOBP_CELLULAR_RESPONSE_TO_OXIDISED_LOW_DENSITY_LIPOPROTEIN_PARTICLE_STIMULUS	https://www.gsea-msigdb.org/gsea/msigdb/human/geneset/GOBP_CELLULAR_RESPONSE_TO_OXIDISED_LOW_DENSITY_LIPOPROTEIN_PARTICLE_STIMULUS	ADTRP	AKT1	CD36	CD68	MIA3	MIR146A	MIR20A	MYD88	SMPD3	TICAM1	TLR4	TLR6	TREM2	TXNIP
GOBP_CELLULAR_RESPONSE_TO_OXYGEN_CONTAINING_COMPOUND	https://www.gsea-msigdb.org/gsea/msigdb/human/geneset/GOBP_CELLULAR_RESPONSE_TO_OXYGEN_CONTAINING_COMPOUND	AANAT	ABCA1	ABCA12	ABCB4	ABCC1	ABCC8	ABL1	ABL2	ACACA	ACE	ACER1	ACHE	ACOD1	ACTB	ACTN2	ADAM15	ADAM9	ADAMTS13	ADCY1	ADCY2	ADCY3	ADCY5	ADCY6	ADCY7	ADCY8	ADD1	ADGRV1	ADH4	ADH5	ADIPOQ	ADIPOR1	ADPRS	ADRA2A	ADRB2	AGAP3	AGER	AGRN	AGT	AGTR1	AGTR2	AGTRAP	AHCYL1	AHR	AHSG	AICDA	AIFM1	AKAP6	AKAP8
GOBP_CELLULAR_RESPONSE_TO_OXYGEN_GLUCOSE_DEPRIVATION	https://www.gsea-msigdb.org/gsea/msigdb/human/geneset/GOBP_CELLULAR_RESPONSE_TO_OXYGEN_GLUCOSE_DEPRIVATION	AIFM1	AQP3	ATF4	CBL	CYSLTR1	MAP3K7	NONO	TSC1
GOBP_CELLULAR_RESPONSE_TO_OXYGEN_LEVELS	https://www.gsea-msigdb.org/gsea/msigdb/human/geneset/GOBP_CELLULAR_RESPONSE_TO_OXYGEN_LEVELS	ACAA2	ADAM8	ADO	AIFM1	AJUBA	AK4	AKT1	ANGPT4	AQP1	AQP3	ATF2	ATF4	ATG7	ATP6AP1	ATP6V0A2	ATP6V0D1	ATP6V1A	ATP6V1G1	ATP7A	BAD	BCL2	BMP7	BNIP3	BNIP3L	BRIP1	CASR	CAV1	CBL	CBS	CCDC115	CCNA2	CDKN1B	CFLAR	CHCHD2	CITED2	CLCA1	CPEB1	CPEB2	CPEB4	CYBB	CYSLTR1	DDAH1	DDR2	DNMT3A	DRD2	EDN1	EEF2K	EGLN1
GOBP_CELLULAR_RESPONSE_TO_OXYGEN_RADICAL	https://www.gsea-msigdb.org/gsea/msigdb/human/geneset/GOBP_CELLULAR_RESPONSE_TO_OXYGEN_RADICAL	ADPRS	APOA4	ATP7A	BMP7	CCS	CD36	DHFR	DHFRP1	FANCC	FBLN5	GCH1	GLRX2	H19	MIR21	MIR675	MPO	MT3	NFE2L2	NOS3	NQO1	PRDX1	PRDX2	SOD1	SOD2	SOD3
GOBP_CELLULAR_RESPONSE_TO_PARATHYROID_HORMONE_STIMULUS	https://www.gsea-msigdb.org/gsea/msigdb/human/geneset/GOBP_CELLULAR_RESPONSE_TO_PARATHYROID_HORMONE_STIMULUS	FGF23	FOS	HDAC6	KAT2B	MEF2C	PHEX	PRKACA	SLC34A1	SOST	WNT10B
GOBP_CELLULAR_RESPONSE_TO_PEPTIDE	https://www.gsea-msigdb.org/gsea/msigdb/human/geneset/GOBP_CELLULAR_RESPONSE_TO_PEPTIDE	ABCC1	ACTN2	ADCY6	ADCY8	ADIPOQ	ADIPOR1	ADRB2	AGER	AGT	AGTR1	AGTR2	AGTRAP	AHCYL1	AHSG	AKT1	AKT2	ANO1	AP3S1	APP	APPL1	APPL2	ARHGEF2	ARID1B	ASS1	ATP1A3	ATP2B1	BACE1	BAIAP2	BCAR1	BCAR3	BCL2L2	BGLAP	BRIP1	C1QTNF12	C2CD5	CA2	CACNA1A	CACNA2D1	CACNB1	CAMK2A	CAPN10	CASP4	CASR	CAV1	CAV2	CCNA2	CD36	CDC6
GOBP_CELLULAR_RESPONSE_TO_PEPTIDE_HORMONE_STIMULUS	https://www.gsea-msigdb.org/gsea/msigdb/human/geneset/GOBP_CELLULAR_RESPONSE_TO_PEPTIDE_HORMONE_STIMULUS	ACTN2	ADCY6	ADCY8	ADIPOQ	ADIPOR1	AGT	AGTR1	AGTR2	AGTRAP	AHCYL1	AHSG	AKT1	AKT2	AP3S1	APPL1	APPL2	ARID1B	ASS1	ATP2B1	BAIAP2	BCAR1	BCAR3	BGLAP	BRIP1	C1QTNF12	C2CD5	CA2	CAMK2A	CAPN10	CAV1	CAV2	CCNA2	CDC6	CEACAM1	CFLAR	CPEB1	CPEB2	CPS1	CRHBP	CRHR1	CRHR2	CRK	CSH1	CSH2	CSHL1	CSK	CSRP3	CTSD
GOBP_CELLULAR_RESPONSE_TO_PEPTIDOGLYCAN	https://www.gsea-msigdb.org/gsea/msigdb/human/geneset/GOBP_CELLULAR_RESPONSE_TO_PEPTIDOGLYCAN	CAMP	DEFB124	NOD2	RELA	RIPK2	TREM2
GOBP_CELLULAR_RESPONSE_TO_PH	https://www.gsea-msigdb.org/gsea/msigdb/human/geneset/GOBP_CELLULAR_RESPONSE_TO_PH	AQP10	ASIC1	ASIC2	CHP1	GNA11	GPLD1	GPR68	HVCN1	HYAL1	INSRR	KCNE1	KCNK18	KCNK4	MCOLN1	NOX1	PCK1	PKD1L3	PKD2L1	RAB11B	RAB11FIP5	SCNN1A	SCNN1B	SCNN1D	SCNN1G	SLC38A3	SLC9A1	TRPV1
GOBP_CELLULAR_RESPONSE_TO_POTASSIUM_ION	https://www.gsea-msigdb.org/gsea/msigdb/human/geneset/GOBP_CELLULAR_RESPONSE_TO_POTASSIUM_ION	CACNA1H	CRHBP	CYP11B1	CYP11B2	DLG2	DLG4	HSF1	KCNJ10	MECP2	NEK7	NPTX1	SLC12A2	STK39
GOBP_CELLULAR_RESPONSE_TO_PROGESTERONE_STIMULUS	https://www.gsea-msigdb.org/gsea/msigdb/human/geneset/GOBP_CELLULAR_RESPONSE_TO_PROGESTERONE_STIMULUS	ACOD1	CYP1B1	IGF1R	SOX10	SRC	TRERF1	VPS54
GOBP_CELLULAR_RESPONSE_TO_PROSTAGLANDIN_E_STIMULUS	https://www.gsea-msigdb.org/gsea/msigdb/human/geneset/GOBP_CELLULAR_RESPONSE_TO_PROSTAGLANDIN_E_STIMULUS	ACACA	ADCY6	AKAP8	AKT1	GNB1	GNG2	P2RY4	P2RY6	PAX6	PRKAA1	PRKAA2	PRKCE	PTGER2	PTGER4	SFRP1	TNFSF4
GOBP_CELLULAR_RESPONSE_TO_PROSTAGLANDIN_STIMULUS	https://www.gsea-msigdb.org/gsea/msigdb/human/geneset/GOBP_CELLULAR_RESPONSE_TO_PROSTAGLANDIN_STIMULUS	ACACA	ADCY6	AKAP8	AKR1C2	AKR1C3	AKT1	GNB1	GNG2	P2RY4	P2RY6	PAX6	PRKAA1	PRKAA2	PRKCE	PTGDR	PTGER2	PTGER4	PTGFR	SFRP1	TNC	TNFSF4
GOBP_CELLULAR_RESPONSE_TO_PURINE_CONTAINING_COMPOUND	https://www.gsea-msigdb.org/gsea/msigdb/human/geneset/GOBP_CELLULAR_RESPONSE_TO_PURINE_CONTAINING_COMPOUND	CACNA1S	CASQ2	CHEK1	GSTM2	P2RY1	P2RY6	RYR1	RYR2	RYR3	SELENON	SLC8A1	TMEM38A	TMEM38B	TRPM2
GOBP_CELLULAR_RESPONSE_TO_RADIATION	https://www.gsea-msigdb.org/gsea/msigdb/human/geneset/GOBP_CELLULAR_RESPONSE_TO_RADIATION	ACTR5	AIPL1	AKT2	AQP1	ATF4	ATM	ATR	AURKB	BABAM2	BAK1	BARD1	BAX	BCL2L1	BLM	BMF	BRCA1	BRCA2	BRCC3	CAMKMT	CASP9	CCND2	CDC25A	CDKN1A	CERS1	CHEK2	CLOCK	COPS9	CRB1	CREBBP	CRIP1	CRY1	CRY2	CRYAB	CUL4A	CUL4B	DDB1	DDB2	DHX36	ECT2	EEF1D	EGR1	EIF2AK4	EIF2S1	ELK1	EP300	ERCC1	ERCC4	FBXO4
GOBP_CELLULAR_RESPONSE_TO_REACTIVE_NITROGEN_SPECIES	https://www.gsea-msigdb.org/gsea/msigdb/human/geneset/GOBP_CELLULAR_RESPONSE_TO_REACTIVE_NITROGEN_SPECIES	AIFM1	AQP1	ATP5F1A	CCNA2	CDK2	CFLAR	CRK	DPEP1	FOXO1	GUCY1B1	HNRNPD	KCNC2	MAP3K5	MMP3	MTR	STAT6	TRAF2
GOBP_CELLULAR_RESPONSE_TO_REACTIVE_OXYGEN_SPECIES	https://www.gsea-msigdb.org/gsea/msigdb/human/geneset/GOBP_CELLULAR_RESPONSE_TO_REACTIVE_OXYGEN_SPECIES	ABL1	ADPRS	AGAP3	AIFM1	AKT1	ANKZF1	ANXA1	APOA4	AQP1	ATM	ATP7A	AXL	BECN1	BMP7	BNIP3	BTK	CAMKK2	CAT	CBX8	CCS	CD36	CDK1	CHUK	CRYGD	CYP1B1	DDR2	DHFR	DHFRP1	ECT2	EDN1	EGFR	ERCC6L2	ERN1	EZH2	FABP1	FANCC	FBLN5	FER	FOS	FOXP1	FXN	FYN	GCH1	GLRX2	GPR37	GPR37L1	H19	HDAC2
GOBP_CELLULAR_RESPONSE_TO_RETINOIC_ACID	https://www.gsea-msigdb.org/gsea/msigdb/human/geneset/GOBP_CELLULAR_RESPONSE_TO_RETINOIC_ACID	ABCA1	ABL2	ALDH1A2	AQP1	ATM	BRINP1	BRINP2	BRINP3	COL1A1	CREB1	CYP26B1	EPHA3	FGFR2	FZD10	FZD4	FZD7	GJB3	GSK3B	HAND2	HDAC2	HOXA2	HTRA2	LEP	LTK	LYN	MEIOSIN	MYB	NDUFA13	OSR1	PAX2	PCK1	PHB2	PHC1	PTK2B	PTK6	PTK7	RARA	RARG	RET	RORB	SERPINF1	SETX	SLC6A4	SNW1	SOX9	STRA8	TBX1	TEAD2
GOBP_CELLULAR_RESPONSE_TO_SALT	https://www.gsea-msigdb.org/gsea/msigdb/human/geneset/GOBP_CELLULAR_RESPONSE_TO_SALT	ACER1	ACHE	ADCY1	ADCY7	ADCY8	ADD1	ADGRV1	AGRN	AKR1C3	ALOX15	ALOX5AP	AMIGO1	AOC1	AQP2	ATP2B4	AVPR1A	B2M	BAIAP2	BCL11A	BRAF	CACNA1H	CALR	CAMK2D	CAPN3	CARF	CCNA2	CDH1	CDK5R1	CDKN1B	CEBPA	CHP2	CHRM1	CHRM2	CHRM3	CHRM4	CHRM5	CHRNA3	CHRNA7	CHRNB2	CHRND	CIB2	CLDN1	CLIC4	COL1A1	CPNE1	CPNE2	CPNE3	CPNE4
GOBP_CELLULAR_RESPONSE_TO_SALT_STRESS	https://www.gsea-msigdb.org/gsea/msigdb/human/geneset/GOBP_CELLULAR_RESPONSE_TO_SALT_STRESS	AKR1B1	AQP1	CAPN3	EFHD1	FBP1	LETM1	MICU1	PCK1	SLC12A6	SLC25A23	TRPV4	XRCC5	XRCC6	ZFP36L1
GOBP_CELLULAR_RESPONSE_TO_SODIUM_ARSENITE	https://www.gsea-msigdb.org/gsea/msigdb/human/geneset/GOBP_CELLULAR_RESPONSE_TO_SODIUM_ARSENITE	DAXX	HNRNPA1	HSF1	MAPK13	ZC3H12A
GOBP_CELLULAR_RESPONSE_TO_STARVATION	https://www.gsea-msigdb.org/gsea/msigdb/human/geneset/GOBP_CELLULAR_RESPONSE_TO_STARVATION	AKR1C3	ALB	AMBRA1	AOC1	ASNS	ATF2	ATF3	ATF4	ATG14	ATG5	ATG7	ATXN3	BCL2	BECN1	BECN2	BGLAP	BHLHA15	BMPR2	BMT2	CARTPT	CASTOR1	CDKN1A	CLEC16A	COMT	CPEB4	CTSK	DAP	DAPL1	DEPDC5	DNAJC15	DSC2	EHMT2	EIF2AK2	EIF2AK3	EIF2AK4	EIF2S1	ELAPOR1	FADS1	FAS	FBXO22	FLCN	FNIP1	FOS	FOXA3	FOXO1	FOXO3	GABARAP	GABARAPL1
GOBP_CELLULAR_RESPONSE_TO_STEROID_HORMONE_STIMULUS	https://www.gsea-msigdb.org/gsea/msigdb/human/geneset/GOBP_CELLULAR_RESPONSE_TO_STEROID_HORMONE_STIMULUS	ABHD2	ACE	ACOD1	ADTRP	AIFM1	AKR1C3	ANXA1	AQP1	AR	ARID1A	ASS1	ATP1A1	ATP1A2	ATP1A3	ATP5F1A	AXIN2	BCL2L11	BMAL1	BRCA1	CALCOCO1	CALR	CARM1	CASP9	CFLAR	CLOCK	CNOT1	CNOT2	CNOT9	CRY1	CRY2	CST11	CYP1B1	CYP7B1	DAB2	DAXX	DDIT4	DDRGK1	DDX17	DDX5	DDX54	DEFA1	DEFA1B	DEFA3	DNAAF4	DNAJA1	EDN1	EGLN2	EIF4E
GOBP_CELLULAR_RESPONSE_TO_STEROL	https://www.gsea-msigdb.org/gsea/msigdb/human/geneset/GOBP_CELLULAR_RESPONSE_TO_STEROL	ABCA1	CES1	CYP7A1	DAG1	DYNAP	GPLD1	GPR155	GRAMD1A	GRAMD1B	GRAMD1C	INHBA	INHBB	INSIG1	INSIG2	LRP6	LRP8	MIR182	MIR185	MIR96	MLC1	OSBPL7	PTCH1	RORA	RORC	SMO
GOBP_CELLULAR_RESPONSE_TO_STEROL_DEPLETION	https://www.gsea-msigdb.org/gsea/msigdb/human/geneset/GOBP_CELLULAR_RESPONSE_TO_STEROL_DEPLETION	AMFR	ARHGEF10L	EIF2A	ERLIN1	ERLIN2	FBXW7	INSIG1	INSIG2	MIR96	NPC1L1	SCAP	SPRING1	SREBF1	SREBF2	TMED2	ZBTB7B
GOBP_CELLULAR_RESPONSE_TO_STRESS	https://www.gsea-msigdb.org/gsea/msigdb/human/geneset/GOBP_CELLULAR_RESPONSE_TO_STRESS	AATF	ABCA7	ABCB10	ABCC1	ABCD1	ABI3	ABL1	ABRAXAS1	ACAA2	ACD	ACER2	ACKR3	ACTB	ACTL6A	ACTL6B	ACTR2	ACTR5	ACTR8	ADAM8	ADCY8	ADM	ADO	ADPRS	AEN	AFF4	AGAP3	AGER	AGR2	AIDA	AIF1	AIFM1	AIFM2	AIM2	AJUBA	AK4	AKIRIN2	AKR1B1	AKR1C3	AKT1	AKT3	ALB	ALDH3B1	ALKBH1	ALKBH2	ALKBH3	ALKBH7	ALKBH8	ALOX15
GOBP_CELLULAR_RESPONSE_TO_TEMPERATURE_STIMULUS	https://www.gsea-msigdb.org/gsea/msigdb/human/geneset/GOBP_CELLULAR_RESPONSE_TO_TEMPERATURE_STIMULUS	HTR1B	HTR2B	KCNK4	TRPM2	TRPV1
GOBP_CELLULAR_RESPONSE_TO_TESTOSTERONE_STIMULUS	https://www.gsea-msigdb.org/gsea/msigdb/human/geneset/GOBP_CELLULAR_RESPONSE_TO_TESTOSTERONE_STIMULUS	AR	ELK1	IGF1R	MSN	NCF1	NCOA4	ROCK2	RWDD1	SIRT1	SLC39A9	SPP1	SRD5A1
GOBP_CELLULAR_RESPONSE_TO_THYROID_HORMONE_STIMULUS	https://www.gsea-msigdb.org/gsea/msigdb/human/geneset/GOBP_CELLULAR_RESPONSE_TO_THYROID_HORMONE_STIMULUS	BRD8	CTSB	CTSH	CTSL	CTSS	GAS2L1	GATA1	GCLC	GCLM	GHSR	INHBB	KIT	KLF9	LMO2	MED1	RDX	THRB
GOBP_CELLULAR_RESPONSE_TO_TOPOLOGICALLY_INCORRECT_PROTEIN	https://www.gsea-msigdb.org/gsea/msigdb/human/geneset/GOBP_CELLULAR_RESPONSE_TO_TOPOLOGICALLY_INCORRECT_PROTEIN	ABCA7	ABCB10	AGR2	AKIRIN2	AMFR	ATF3	ATF4	ATF6	ATF6B	ATXN3	AUP1	BAG3	BAG6	BAK1	BAX	BCL2L11	BFAR	BHLHA15	BOK	CCND1	CDK5RAP3	COPS5	CREB3	CREB3L1	CREBZF	CTH	CUL3	DAB2IP	DAXX	DDIT3	DDRGK1	DERL1	DERL2	DERL3	DNAJB12	DNAJB14	DNAJB9	DNAJC10	DNAJC18	EIF2AK2	EIF2AK3	EIF2S1	ERLEC1	ERMP1	ERN1	ERN2	ERO1A	FGF21
GOBP_CELLULAR_RESPONSE_TO_TOXIC_SUBSTANCE	https://www.gsea-msigdb.org/gsea/msigdb/human/geneset/GOBP_CELLULAR_RESPONSE_TO_TOXIC_SUBSTANCE	ABCB6	ABCG2	ABTB2	ADH4	ADH5	AIFM2	AKR1A1	AKR1B10	ALB	ALDH1A1	ALOX5AP	APOA4	APOE	APOM	AQP8	ATP7A	BMP7	CAT	CCS	CD36	CERS1	CLIC2	CYGB	DHFR	DHFRP1	DUOX1	DUOX2	EPX	ESD	FABP1	FANCC	FBLN5	GCH1	GFER	GPX1	GPX2	GPX3	GPX4	GPX5	GPX6	GPX7	GPX8	GSR	GSTA1	GSTK1	GSTM1	GSTM2	GSTM3
GOBP_CELLULAR_RESPONSE_TO_TYPE_II_INTERFERON	https://www.gsea-msigdb.org/gsea/msigdb/human/geneset/GOBP_CELLULAR_RESPONSE_TO_TYPE_II_INTERFERON	ACOD1	ACTG1	ACTR2	ACTR3	ADAMTS13	AIF1	AQP4	ARG1	ASS1	CALM1	CAMK2A	CASP1	CCL1	CCL11	CCL13	CCL14	CCL15	CCL16	CCL17	CCL18	CCL19	CCL2	CCL20	CCL21	CCL22	CCL23	CCL24	CCL25	CCL26	CCL3	CCL3L1	CCL3L3	CCL4	CCL5	CCL7	CCL8	CD47	CD58	CDC37	CDC42	CDC42EP2	CDC42EP4	CLDN1	CX3CL1	DAPK1	DAPK3	EDN1	EPRS1
GOBP_CELLULAR_RESPONSE_TO_UNFOLDED_PROTEIN	https://www.gsea-msigdb.org/gsea/msigdb/human/geneset/GOBP_CELLULAR_RESPONSE_TO_UNFOLDED_PROTEIN	ABCA7	ABCB10	AGR2	AMFR	ATF3	ATF4	ATF6	ATF6B	BAG3	BAK1	BAX	BCL2L11	BFAR	BHLHA15	BOK	CCND1	CDK5RAP3	COPS5	CREB3	CREB3L1	CREBZF	CTH	DAB2IP	DAXX	DDIT3	DDRGK1	DERL1	DERL2	DERL3	DNAJB9	DNAJC10	EIF2AK2	EIF2AK3	EIF2S1	ERLEC1	ERMP1	ERN1	ERN2	ERO1A	FGF21	FICD	HERPUD1	HERPUD2	HSF1	HSPA1A	HSPA5	HSPB8	HSPD1
GOBP_CELLULAR_RESPONSE_TO_UV	https://www.gsea-msigdb.org/gsea/msigdb/human/geneset/GOBP_CELLULAR_RESPONSE_TO_UV	ACTR5	AQP1	ATF4	ATR	AURKB	BAK1	BAX	BMF	CASP9	CDC25A	CDKN1A	CERS1	COPS9	CREBBP	CRIP1	CUL4A	CUL4B	DDB1	DDB2	DHX36	EIF2AK4	EIF2S1	EP300	ERCC1	ERCC4	H2AC25	HYAL1	HYAL2	HYAL3	INO80	KDM1A	MAP3K20	MAPK11	MAPK13	MAPK14	MC1R	MDM2	METTL3	MFAP4	MME	MMP1	MMP2	MMP3	MMP9	MYC	N4BP1	NEDD4	NFATC4
GOBP_CELLULAR_RESPONSE_TO_UV_A	https://www.gsea-msigdb.org/gsea/msigdb/human/geneset/GOBP_CELLULAR_RESPONSE_TO_UV_A	CERS1	MME	MMP1	MMP2	MMP3	MMP9	OPN1SW	OPN3	OPN5	PPID	TIMP1
GOBP_CELLULAR_RESPONSE_TO_UV_B	https://www.gsea-msigdb.org/gsea/msigdb/human/geneset/GOBP_CELLULAR_RESPONSE_TO_UV_B	CDKN1A	CRIP1	HYAL1	HYAL2	HYAL3	MAP3K20	MAPK11	MAPK14	MFAP4	MME	NLRP1	STK11
GOBP_CELLULAR_RESPONSE_TO_UV_C	https://www.gsea-msigdb.org/gsea/msigdb/human/geneset/GOBP_CELLULAR_RESPONSE_TO_UV_C	MDM2	PIERCE1	POLH	ST20	TP53
GOBP_CELLULAR_RESPONSE_TO_VASCULAR_ENDOTHELIAL_GROWTH_FACTOR_STIMULUS	https://www.gsea-msigdb.org/gsea/msigdb/human/geneset/GOBP_CELLULAR_RESPONSE_TO_VASCULAR_ENDOTHELIAL_GROWTH_FACTOR_STIMULUS	ADAMTS12	ADAMTS3	ADGRA2	AKT1	ANXA1	ATP2B4	CADM4	CCBE1	CD63	DAB2IP	DCN	DLL1	DLL4	EGR3	EMILIN1	ERN1	FBXW7-AS1	FLT1	FLT3	FLT4	FOXC1	GAB1	GAS1	HRG	HSPB1	IL12A	IL12B	ITGB1BP1	JCAD	KDR	MAP2K3	MAPK14	MAPKAPK2	MIR16-1	MIR196A1	MIR199A1	MIR20A	MIR21	MIR23A	MIR26A1	MIR27A	MIR27B	MIR329-1	MIR342	MIR424	MT1G	MYO1C	NOTCH1
GOBP_CELLULAR_RESPONSE_TO_VIRUS	https://www.gsea-msigdb.org/gsea/msigdb/human/geneset/GOBP_CELLULAR_RESPONSE_TO_VIRUS	ADAR	ARF1	ATF2	BAX	CALR	CCL19	CCL5	CHUK	CXCL10	DDX3X	EIF5A	EXT1	FMR1	GBF1	GSDME	H19	HIF1A	HSP90AA1	IFI6	IFIH1	IFNA1	IFNA10	IFNA13	IFNA14	IFNA16	IFNA17	IFNA2	IFNA21	IFNA4	IFNA5	IFNA6	IFNA7	IFNA8	IFNAR1	IFNAR2	IFNB1	IFNE	IFNG	IFNGR1	IFNGR2	IFNK	IFNL1	IFNL2	IFNL3	IFNL4	IFNLR1	IFNW1	IKBKE
GOBP_CELLULAR_RESPONSE_TO_VITAMIN	https://www.gsea-msigdb.org/gsea/msigdb/human/geneset/GOBP_CELLULAR_RESPONSE_TO_VITAMIN	BGLAP	BRIP1	CASR	COL1A1	CYP24A1	CYP27B1	FES	FGF23	FOLR1	FOLR2	GAS6	GDAP1	KANK2	LEP	MDM2	MED1	MIR125B1	MN1	PENK	PHEX	PIM1	POSTN	RXRA	RXRB	SFRP1	SNAI2	SNW1	TNC	TRIM24	VDR
GOBP_CELLULAR_RESPONSE_TO_VITAMIN_D	https://www.gsea-msigdb.org/gsea/msigdb/human/geneset/GOBP_CELLULAR_RESPONSE_TO_VITAMIN_D	BGLAP	CASR	CYP24A1	CYP27B1	FES	FGF23	GDAP1	KANK2	MED1	MIR125B1	MN1	PENK	PHEX	PIM1	RXRA	RXRB	SFRP1	SNAI2	SNW1	TNC	TRIM24	VDR
GOBP_CELLULAR_RESPONSE_TO_WATER_STIMULUS	https://www.gsea-msigdb.org/gsea/msigdb/human/geneset/GOBP_CELLULAR_RESPONSE_TO_WATER_STIMULUS	AQP2	AVPR1A	PIK3CA	PKD2	PLEC	SIPA1
GOBP_CELLULAR_RESPONSE_TO_XENOBIOTIC_STIMULUS	https://www.gsea-msigdb.org/gsea/msigdb/human/geneset/GOBP_CELLULAR_RESPONSE_TO_XENOBIOTIC_STIMULUS	AADAC	ABCA1	ABCB1	ABCB11	ABCC1	ABCC2	ABCC3	ABCC4	ABCC5	ACAA1	ACER2	ACSL1	ACSM1	ACSM2B	ADA	ADIPOQ	ADSS1	AHR	AIM2	AIP	AKR1C1	ALDH3A1	ANKRD1	AOC2	AOX1	AS3MT	ASIC2	BCHE	BPHL	BRAF	CAD	CBR1	CBR3	CD69	CERS1	CES2	CES3	CMBL	CRHBP	CRKL	CRYZ	CXCR4	CYB5B	CYP1A1	CYP1A2	CYP1B1	CYP26A1	CYP26B1
GOBP_CELLULAR_RESPONSE_TO_X_RAY	https://www.gsea-msigdb.org/gsea/msigdb/human/geneset/GOBP_CELLULAR_RESPONSE_TO_X_RAY	ATM	CCND2	GATA3	NIPBL	NUCKS1	PRAP1	SFRP1	SFRP2	TP53BP1	XRCC5	XRCC6
GOBP_CELLULAR_RESPONSE_TO_ZINC_ION	https://www.gsea-msigdb.org/gsea/msigdb/human/geneset/GOBP_CELLULAR_RESPONSE_TO_ZINC_ION	ATP13A2	CREB1	GLRA1	GLRA2	HVCN1	KCNK3	MT1A	MT1B	MT1DP	MT1E	MT1F	MT1G	MT1H	MT1HL1	MT1M	MT1X	MT2A	MT3	MT4	MTF1	P2RX4	PARP1	TSPO	ZNF658
GOBP_CELLULAR_SENESCENCE	https://www.gsea-msigdb.org/gsea/msigdb/human/geneset/GOBP_CELLULAR_SENESCENCE	ABI3	ABL1	AKT3	ARG2	ATM	B2M	BCL6	BMAL1	BMPR1A	BRCA2	CALR	CDK2	CDK6	CDKN1A	CDKN1B	CDKN2A	CDKN2B	CGAS	CITED2	COMP	DNAJA3	ECRG4	EEF1E1	FBXO4	FBXO5	FZR1	H2AX	HLA-G	HMGA1	HMGA2	HRAS	ID2	IGF1R	ING2	KAT5	KAT6A	KIR2DL4	LMNA	MAGEA2	MAGEA2B	MAP2K1	MAP2K3	MAP2K4	MAP2K6	MAP2K7	MAP3K3	MAP3K5	MAPK10
GOBP_CELL_ACTIVATION	https://www.gsea-msigdb.org/gsea/msigdb/human/geneset/GOBP_CELL_ACTIVATION	ABL1	ABL2	ACTA2	ACTB	ACTG1	ACTL6A	ACTL6B	ACTN1	ADA	ADAM10	ADAM17	ADAM8	ADAM9	ADAMTS13	ADAMTS18	ADGRE2	ADGRF5	ADGRG3	ADORA2A	ADORA2B	ADRA2A	ADRA2B	ADRA2C	AGER	AHR	AICDA	AIF1	AIRE	AKAP12	AKAP17A	AKIRIN2	AKT1	ALOX12	AMBRA1	ANXA1	ANXA3	AP1G1	AP3B1	AP3D1	APBB1IP	APLF	APOE	APP	AQP8	ARG1	ARG2	ARID1A	ARID1B
GOBP_CELL_ACTIVATION_INVOLVED_IN_IMMUNE_RESPONSE	https://www.gsea-msigdb.org/gsea/msigdb/human/geneset/GOBP_CELL_ACTIVATION_INVOLVED_IN_IMMUNE_RESPONSE	ABL1	ADA	ADGRE2	ADORA2B	AICDA	ANXA1	ANXA3	AP1G1	APBB1IP	APLF	APP	ASCL2	ATAD5	ATP7A	BATF	BCL3	BCL6	BCR	BTK	C12orf4	C17orf99	CBL	CCL19	CCL3	CCR2	CCR6	CD177	CD180	CD19	CD1C	CD244	CD28	CD300A	CD40	CD40LG	CD46	CD74	CD80	CD81	CD84	CD86	CDH17	CEACAM1	CHGA	CLCF1	CLEC4D	CLEC4E	CLNK
GOBP_CELL_ADHESION	https://www.gsea-msigdb.org/gsea/msigdb/human/geneset/GOBP_CELL_ADHESION	AATF	ABCA12	ABI3BP	ABL1	ABL2	ACAN	ACER2	ACHE	ACKR3	ACTB	ACTG1	ACTL6A	ACTL6B	ACTN1	ACTN2	ACTN3	ACTN4	ACVR1	ACVRL1	ADA	ADAM10	ADAM12	ADAM15	ADAM17	ADAM18	ADAM19	ADAM2	ADAM22	ADAM23	ADAM32	ADAM8	ADAM9	ADAMDEC1	ADAMTS12	ADAMTS13	ADAMTS18	ADAMTS9	ADD2	ADGRB1	ADGRE1	ADGRE2	ADGRE5	ADGRG1	ADGRL1	ADGRL3	ADGRV1	ADIPOQ	ADORA2A
GOBP_CELL_ADHESION_INVOLVED_IN_HEART_MORPHOGENESIS	https://www.gsea-msigdb.org/gsea/msigdb/human/geneset/GOBP_CELL_ADHESION_INVOLVED_IN_HEART_MORPHOGENESIS	ACVR1	CPLANE2	FLRT2	GATA5	TGFB2	TGFBR2
GOBP_CELL_ADHESION_MEDIATED_BY_INTEGRIN	https://www.gsea-msigdb.org/gsea/msigdb/human/geneset/GOBP_CELL_ADHESION_MEDIATED_BY_INTEGRIN	ACER2	ADA	ADAM17	ADAM9	CCL21	CCL5	CCN3	CD3E	CIB1	COL16A1	CRK	CRKL	CXCL13	CYP1B1	DPP4	EFNA1	EMILIN1	EMILIN2	EPHA2	EPHA8	EXT1	FBN1	FERMT1	FERMT3	FOXC2	FYB2	HRG	ICAM1	IFT74	ITGA1	ITGA10	ITGA11	ITGA2	ITGA2B	ITGA3	ITGA4	ITGA5	ITGA6	ITGA7	ITGA8	ITGA9	ITGAD	ITGAE	ITGAL	ITGAM	ITGAV	ITGAX	ITGB1
GOBP_CELL_ADHESION_MOLECULE_PRODUCTION	https://www.gsea-msigdb.org/gsea/msigdb/human/geneset/GOBP_CELL_ADHESION_MOLECULE_PRODUCTION	APOA1	CAV1	CXCL8	FUT7	GCNT1	GOLPH3	IL1B	MIR101-1	MIR1298	MIR144	MIR146A	MIR206	MIR20A	MIR221	MIR222	MIR27B	MIR374A	MIR506	MIR520C	MYOCD	NOTCH1	NOTCH4	PPIA
GOBP_CELL_AGGREGATION	https://www.gsea-msigdb.org/gsea/msigdb/human/geneset/GOBP_CELL_AGGREGATION	BARX2	BMP1	BMPR1B	BPIFA1	CCN2	COL11A1	COL2A1	FGF4	FGF6	LTF	MAPK14	MGP	MPZ	MYF5	OTOR	PKD1	SOX5	SOX6	SOX9	THRA	TMIGD1	UNCX	WNT7A
GOBP_CELL_CELL_ADHESION	https://www.gsea-msigdb.org/gsea/msigdb/human/geneset/GOBP_CELL_CELL_ADHESION	ABCA12	ABL1	ABL2	ACTB	ACTG1	ACTL6A	ACTL6B	ACTN1	ACVR1	ADA	ADAM19	ADAM8	ADAM9	ADAMTS18	ADD2	ADGRL1	ADGRL3	ADGRV1	ADIPOQ	ADORA2A	ADTRP	AFDN	AGER	AIF1	AJUBA	AKNA	AKT1	ALCAM	ALOX12	ALOX5	AMBRA1	AMIGO1	AMIGO2	AMIGO3	ANK3	ANXA1	ANXA2	ANXA9	AP3B1	AP3D1	APOA1	APOA4	ARG1	ARG2	ARID1A	ARID1B	ARID2	ARVCF
GOBP_CELL_CELL_ADHESION_INVOLVED_IN_GASTRULATION	https://www.gsea-msigdb.org/gsea/msigdb/human/geneset/GOBP_CELL_CELL_ADHESION_INVOLVED_IN_GASTRULATION	ADIPOQ	APOA1	IL10	IL1RN	KLF4	MAP2K5	MAPK7	MBP	MIR221	MYADM	RIC8A	WNK1
GOBP_CELL_CELL_ADHESION_MEDIATED_BY_CADHERIN	https://www.gsea-msigdb.org/gsea/msigdb/human/geneset/GOBP_CELL_CELL_ADHESION_MEDIATED_BY_CADHERIN	ADAM19	AFDN	BMP6	CDH1	CDH10	CDH11	CDH12	CDH13	CDH15	CDH17	CDH18	CDH19	CDH2	CDH20	CDH22	CDH24	CDH26	CDH3	CDH4	CDH5	CDH6	CDH7	CDH8	CDH9	CDHR2	CDHR3	CTNND1	DENND6A	EPCAM	FER	FLOT1	FOXA1	FOXA2	MAD2L2	MMP24	NEXMIF	NOTCH1	NOTCH4	PLEKHA7	PLG	PPM1F	PTPRU	RGCC	SERPINF2	TJP1	VEGFA	WNT3A	WNT5A
GOBP_CELL_CELL_ADHESION_MEDIATED_BY_INTEGRIN	https://www.gsea-msigdb.org/gsea/msigdb/human/geneset/GOBP_CELL_CELL_ADHESION_MEDIATED_BY_INTEGRIN	ADA	ADAM9	CCL5	CD3E	CXCL13	DPP4	FERMT3	ITGA4	ITGA5	ITGB1	NPNT	PIEZO1	PLPP3	PODXL	SKAP1	SWAP70	WNK1
GOBP_CELL_CELL_ADHESION_VIA_PLASMA_MEMBRANE_ADHESION_MOLECULES	https://www.gsea-msigdb.org/gsea/msigdb/human/geneset/GOBP_CELL_CELL_ADHESION_VIA_PLASMA_MEMBRANE_ADHESION_MOLECULES	ACVR1	ADGRL1	ADGRL3	ADIPOQ	AJUBA	ALCAM	AMIGO1	AMIGO2	AMIGO3	APOA1	ATP2C1	BMP2	CADM1	CADM2	CADM3	CADM4	CBLN1	CD164	CD177	CD209	CD6	CD84	CDH1	CDH10	CDH11	CDH12	CDH13	CDH15	CDH16	CDH17	CDH18	CDH19	CDH2	CDH20	CDH22	CDH23	CDH24	CDH26	CDH3	CDH4	CDH5	CDH6	CDH7	CDH8	CDH9	CDHR1	CDHR2	CDHR3
GOBP_CELL_CELL_JUNCTION_ASSEMBLY	https://www.gsea-msigdb.org/gsea/msigdb/human/geneset/GOBP_CELL_CELL_JUNCTION_ASSEMBLY	ACE	ACE2	ACTB	ACTG1	AFDN	AGT	ANK2	APC	APLNR	ARL2	ARVCF	CAV1	CD9	CDH1	CDH10	CDH11	CDH12	CDH13	CDH15	CDH17	CDH18	CDH19	CDH2	CDH20	CDH22	CDH24	CDH26	CDH3	CDH4	CDH5	CDH6	CDH7	CDH8	CDH9	CDHR3	CLDN1	CLDN10	CLDN11	CLDN12	CLDN14	CLDN15	CLDN16	CLDN17	CLDN18	CLDN19	CLDN2	CLDN20	CLDN22
GOBP_CELL_CELL_JUNCTION_DISASSEMBLY	https://www.gsea-msigdb.org/gsea/msigdb/human/geneset/GOBP_CELL_CELL_JUNCTION_DISASSEMBLY	ABCC8	FER	SNAI2	TGFB3	TGFBR1
GOBP_CELL_CELL_JUNCTION_MAINTENANCE	https://www.gsea-msigdb.org/gsea/msigdb/human/geneset/GOBP_CELL_CELL_JUNCTION_MAINTENANCE	CAMSAP3	CD177	CNTNAP1	CSF1R	F2R	F2RL1	FERMT2	INAVA	KIFC3	KIRREL1	MTSS1	MYADM	NLGN2	PARD6A	PLEKHA7	PRTN3	TJP1	WHRN
GOBP_CELL_CELL_JUNCTION_ORGANIZATION	https://www.gsea-msigdb.org/gsea/msigdb/human/geneset/GOBP_CELL_CELL_JUNCTION_ORGANIZATION	ABCC8	ACE	ACE2	ACTB	ACTG1	ADAM10	ADD1	AFDN	AGT	AJM1	ANK2	APC	APLNR	ARL2	ARVCF	BMP6	CAMSAP3	CAV1	CCM2	CD177	CD9	CDC42	CDH1	CDH10	CDH11	CDH12	CDH13	CDH15	CDH17	CDH18	CDH19	CDH2	CDH20	CDH22	CDH24	CDH26	CDH3	CDH4	CDH5	CDH6	CDH7	CDH8	CDH9	CDHR3	CLDN1	CLDN10	CLDN11	CLDN12
GOBP_CELL_CELL_RECOGNITION	https://www.gsea-msigdb.org/gsea/msigdb/human/geneset/GOBP_CELL_CELL_RECOGNITION	ACR	ADAM18	ADAM2	ADAM32	ALDOA	ASTL	ATP8B3	B4GALT1	CCL19	CCL21	CCR7	CCT2	CCT3	CCT4	CCT5	CCT7	CCT8	CD209	CD6	CD81	CD9	CLEC4M	CLGN	CORO1A	CRISP1	DCST1	DCST2	DLG1	DOCK2	DOCK8	EPHB1	FETUB	FOLR1	FOLR2	FOLR3	FREY1	FUT3	HAVCR2	HSPA1L	IZUMO1	IZUMO1R	LGALS3	LY6K	MSN	NCK2	NEDD9	OVGP1	PAEP
GOBP_CELL_CELL_SIGNALING	https://www.gsea-msigdb.org/gsea/msigdb/human/geneset/GOBP_CELL_CELL_SIGNALING	AACS	ABAT	ABCA1	ABCA12	ABCC4	ABCC8	ABHD6	ABL1	ABR	ACE	ACHE	ACP4	ACSL4	ACVR1C	ACVR2B	ADAM10	ADAM8	ADARB1	ADCY1	ADCY5	ADCY8	ADCYAP1	ADGRA2	ADGRB1	ADGRE5	ADGRG1	ADIPOQ	ADNP	ADORA1	ADORA2A	ADORA2B	ADORA3	ADRA1A	ADRA1B	ADRA1D	ADRA2A	ADRA2B	ADRA2C	ADRB2	AFDN	AGER	AGRN	AGT	AGTR1	AIMP1	AKAP12	AKAP5	AKAP7
GOBP_CELL_CELL_SIGNALING_BY_WNT	https://www.gsea-msigdb.org/gsea/msigdb/human/geneset/GOBP_CELL_CELL_SIGNALING_BY_WNT	ABL1	ADGRA2	ADNP	ALPK2	AMER1	AMER2	AMER3	AMFR	AMOTL1	AMOTL2	ANKRD6	APC	APC2	APCDD1	APCDD1L	APOE	APP	ARHGEF19	ARL6	ASPM	ATP6AP2	ATP6V0C	ATP6V1C2	AXIN1	AXIN2	BAMBI	BARX1	BCL7B	BCL9	BCL9L	BICC1	BIRC8	BMAL1	BMP2	BRD7	BTRC	C12orf43	CALCOCO1	CAPRIN2	CAV1	CBY1	CCAR2	CCDC88C	CCN4	CCND1	CCNE1	CCNY	CCNYL1
GOBP_CELL_CELL_SIGNALING_INVOLVED_IN_CARDIAC_CONDUCTION	https://www.gsea-msigdb.org/gsea/msigdb/human/geneset/GOBP_CELL_CELL_SIGNALING_INVOLVED_IN_CARDIAC_CONDUCTION	ANK2	CACNA1C	CACNA1D	CACNA1G	CACNA2D1	CACNB2	CASQ2	CXADR	FLNA	GJA1	GJA5	GJC1	HCN4	KCNA5	KCNE5	KCNJ3	KCNJ5	KCNN2	KCNQ1	MIR208A	MIR328	NUP155	PKP2	RANGRF	RNF207	RYR2	SCN10A	SCN1B	SCN3B	SCN4B	SCN5A	TBX18	TBX5	TRPM4
GOBP_CELL_CHEMOTAXIS	https://www.gsea-msigdb.org/gsea/msigdb/human/geneset/GOBP_CELL_CHEMOTAXIS	ABCC1	ACKR2	ACKR3	ACKR4	ADAM10	ADAM17	ADAM8	ADGRE2	AGTR1	AIF1	AKIRIN1	ALOX5	ANO6	ANXA1	ARHGEF16	ARHGEF5	ARRB2	AZU1	BCAR1	BIN2	BSG	BST1	C1QBP	C3AR1	C5	C5AR1	C5AR2	CALCA	CALR	CAMK1D	CCL1	CCL11	CCL13	CCL14	CCL15	CCL16	CCL17	CCL18	CCL19	CCL2	CCL20	CCL21	CCL22	CCL23	CCL24	CCL25	CCL26	CCL27
GOBP_CELL_COMMUNICATION_BY_ELECTRICAL_COUPLING	https://www.gsea-msigdb.org/gsea/msigdb/human/geneset/GOBP_CELL_COMMUNICATION_BY_ELECTRICAL_COUPLING	ANK3	ATP1A1	ATP1A2	ATP1A3	ATP1B1	ATP1B2	CACNA1C	CALM1	CALM2	CALM3	CAMK2D	CASQ2	CAV1	DBN1	FKBP1B	GJA1	GJA5	GJB2	GJB6	GJC1	GJC2	GJC3	GJD3	HRC	IRX3	KCNA1	PDE4D	PKP2	PRKACA	RYR2	SLC8A1	SRI	TBX5	TRDN
GOBP_CELL_COMMUNICATION_BY_ELECTRICAL_COUPLING_INVOLVED_IN_CARDIAC_CONDUCTION	https://www.gsea-msigdb.org/gsea/msigdb/human/geneset/GOBP_CELL_COMMUNICATION_BY_ELECTRICAL_COUPLING_INVOLVED_IN_CARDIAC_CONDUCTION	ATP1A1	ATP1A2	ATP1A3	ATP1B1	ATP1B2	CACNA1C	CALM1	CALM2	CALM3	CAMK2D	CAV1	FKBP1B	GJA1	GJA5	GJC1	GJC3	GJD3	HRC	IRX3	PDE4D	PKP2	PRKACA	RYR2	SLC8A1	SRI	TBX5	TRDN
GOBP_CELL_COMMUNICATION_INVOLVED_IN_CARDIAC_CONDUCTION	https://www.gsea-msigdb.org/gsea/msigdb/human/geneset/GOBP_CELL_COMMUNICATION_INVOLVED_IN_CARDIAC_CONDUCTION	ANK2	ATP1A1	ATP1A2	ATP1A3	ATP1B1	ATP1B2	CACNA1C	CACNA1D	CACNA1G	CACNA2D1	CACNB2	CALM1	CALM2	CALM3	CAMK2D	CASQ2	CAV1	CTNNA3	CXADR	DSC2	DSG2	DSP	FKBP1B	FLNA	GJA1	GJA5	GJC1	GJC3	GJD3	HCN4	HRC	IRX3	JUP	KCNA5	KCNE5	KCNJ3	KCNJ5	KCNN2	KCNQ1	MIR208A	MIR328	NUP155	PDE4D	PKP2	PRKACA	RANGRF	RNF207	RYR2
GOBP_CELL_CYCLE	https://www.gsea-msigdb.org/gsea/msigdb/human/geneset/GOBP_CELL_CYCLE	AAAS	AATF	ABCB1	ABL1	ABRAXAS1	ABRAXAS2	ACTB	ACTL6A	ACTL6B	ACTR2	ACTR3	ACTR5	ACTR8	ACVR1	ACVR1B	ADAM17	ADAMTS1	ADARB1	ADCYAP1	AFAP1L2	AGO4	AHCTF1	AHR	AICDA	AIF1	AJUBA	AKAP8	AKAP8L	AKT1	AKT2	ALKBH4	ALMS1	ALOX15B	AMBRA1	ANAPC1	ANAPC10	ANAPC11	ANAPC13	ANAPC15	ANAPC16	ANAPC2	ANAPC4	ANAPC5	ANAPC7	ANGEL2	ANK3	ANKFN1	ANKK1
GOBP_CELL_CYCLE_CHECKPOINT_SIGNALING	https://www.gsea-msigdb.org/gsea/msigdb/human/geneset/GOBP_CELL_CYCLE_CHECKPOINT_SIGNALING	ABRAXAS1	ANAPC15	APC	ATF2	ATM	ATR	ATRIP	AURKB	BABAM1	BABAM2	BARD1	BIRC5	BLM	BRCA1	BRCA2	BRCC3	BRIP1	BRSK1	BUB1	BUB1B	BUB3	CAMSAP3	CASP2	CCAR2	CCNB1	CCND1	CCNG1	CDC14B	CDC20	CDC45	CDC5L	CDC6	CDCA8	CDK1	CDK2	CDK5RAP2	CDK5RAP3	CDKN1A	CDKN1B	CDT1	CENPF	CEP63	CHEK1	CHEK2	CHFR	CHMP4C	CLOCK	CLSPN
GOBP_CELL_CYCLE_DNA_REPLICATION	https://www.gsea-msigdb.org/gsea/msigdb/human/geneset/GOBP_CELL_CYCLE_DNA_REPLICATION	AICDA	ATAD5	ATRX	BCL6	BLM	BRCA2	CDC45	CDC7	CDT1	DACH1	DBF4	DBF4B	DNA2	DONSON	E2F7	E2F8	FBXO5	FEN1	GINS1	GINS3	GMNN	INO80	LIG1	MCM2	MCM3	MCM4	MCM6	NUGGC	PCNA	POLA1	RAD51	RECQL5	RPA4	RTEL1	RTF2	TERF1	TERF2	TIPIN	TK1	UPF1	WIZ	WRN	ZMPSTE24	ZNF830	ZPR1
GOBP_CELL_CYCLE_DNA_REPLICATION_INITIATION	https://www.gsea-msigdb.org/gsea/msigdb/human/geneset/GOBP_CELL_CYCLE_DNA_REPLICATION_INITIATION	GINS3	MCM2	MCM3	MCM4	POLA1
GOBP_CELL_CYCLE_G1_S_PHASE_TRANSITION	https://www.gsea-msigdb.org/gsea/msigdb/human/geneset/GOBP_CELL_CYCLE_G1_S_PHASE_TRANSITION	ACTB	ACTL6A	ACTL6B	ACVR1	ACVR1B	ADAM17	ADAMTS1	AIF1	AKT1	AMBRA1	ANKRD17	ANXA1	APBB1	APC	APPL1	APPL2	ARID1A	ARID1B	ARID2	ATM	ATP2B4	BACH1	BCAT1	BCL2	BCL7A	BCL7B	BCL7C	BID	BRD4	BRD7	BTN2A2	CACNB4	CACUL1	CAMK2A	CASP2	CCL2	CCNA2	CCND1	CCND2	CCND3	CCNE1	CCNE2	CCNH	CDC25A	CDC34	CDC6	CDC7	CDC73
GOBP_CELL_CYCLE_G2_M_PHASE_TRANSITION	https://www.gsea-msigdb.org/gsea/msigdb/human/geneset/GOBP_CELL_CYCLE_G2_M_PHASE_TRANSITION	ABCB1	ABRAXAS1	AKAP8	AKAP8L	APP	ARPP19	ATAD5	ATF5	ATM	AURKA	AURKB	AVEN	BABAM1	BABAM2	BACH1	BARD1	BLM	BRCA1	BRCC3	BRD4	BRSK1	BRSK2	CALM1	CALM2	CALM3	CCDC57	CCNA2	CCNB1	CCNB2	CCND1	CCNG1	CCNQ	CCNY	CDC14B	CDC25A	CDC25B	CDC25C	CDC6	CDC7	CDK1	CDK14	CDK2	CDK3	CDK4	CDK5RAP3	CDK6	CDKN1A	CENPF
GOBP_CELL_CYCLE_PHASE_TRANSITION	https://www.gsea-msigdb.org/gsea/msigdb/human/geneset/GOBP_CELL_CYCLE_PHASE_TRANSITION	ABCB1	ABRAXAS1	ACTB	ACTL6A	ACTL6B	ACVR1	ACVR1B	ADAM17	ADAMTS1	AIF1	AKAP8	AKAP8L	AKT1	AMBRA1	ANAPC1	ANAPC11	ANAPC15	ANAPC2	ANAPC4	ANAPC5	ANAPC7	ANKRD17	ANLN	ANXA1	APBB1	APBB2	APC	APP	APPL1	APPL2	ARID1A	ARID1B	ARID2	ARPP19	ATAD5	ATF2	ATF5	ATM	ATP2B4	ATR	ATRIP	AURKA	AURKB	AVEN	BABAM1	BABAM2	BACH1	BARD1
GOBP_CELL_CYCLE_PROCESS	https://www.gsea-msigdb.org/gsea/msigdb/human/geneset/GOBP_CELL_CYCLE_PROCESS	AAAS	ABCB1	ABRAXAS1	ABRAXAS2	ACTB	ACTL6A	ACTL6B	ACTR2	ACTR3	ACVR1	ACVR1B	ADAM17	ADAMTS1	AGO4	AHCTF1	AICDA	AIF1	AKAP8	AKAP8L	AKT1	ALKBH4	ALMS1	AMBRA1	ANAPC1	ANAPC11	ANAPC15	ANAPC2	ANAPC4	ANAPC5	ANAPC7	ANK3	ANKFN1	ANKK1	ANKLE1	ANKLE2	ANKRD17	ANKRD31	ANKRD53	ANLN	ANXA1	ANXA11	APBB1	APBB2	APC	APP	APPL1	APPL2	ARF1
GOBP_CELL_DIFFERENTIATION_INVOLVED_IN_EMBRYONIC_PLACENTA_DEVELOPMENT	https://www.gsea-msigdb.org/gsea/msigdb/human/geneset/GOBP_CELL_DIFFERENTIATION_INVOLVED_IN_EMBRYONIC_PLACENTA_DEVELOPMENT	CASP8	DNAJB6	E2F7	E2F8	EOMES	FZD5	GCM1	GJB5	GRHL2	HAND1	HECTD1	KRT19	KRT8	LIF	MDFI	NR2F2	PLK4	PRDM1	SNAI1	SOX15	SPINT2	ST14	STK3	STK4
GOBP_CELL_DIFFERENTIATION_INVOLVED_IN_KIDNEY_DEVELOPMENT	https://www.gsea-msigdb.org/gsea/msigdb/human/geneset/GOBP_CELL_DIFFERENTIATION_INVOLVED_IN_KIDNEY_DEVELOPMENT	ACTA2	ADIPOQ	AMER1	ASXL1	BASP1	CD24	CD34	CTNNB1	EDNRA	EDNRB	EXT1	FOXC2	FOXJ1	GATA3	GDNF	GLI3	GLIS2	GPR4	GREM1	HES1	IQGAP1	JAG1	KLF15	LAMB2	LGR4	LHX1	LIF	MAGI2	MEF2C	MMP9	MTSS1	MYO1E	NOTCH1	NOTCH2	NPHS1	NPHS2	OSR1	PAX2	PAX8	PDGFB	PODXL	POU3F3	PRKX	PROM1	PTCH1	PTPRO	SALL1	SHH
GOBP_CELL_DIFFERENTIATION_INVOLVED_IN_METANEPHROS_DEVELOPMENT	https://www.gsea-msigdb.org/gsea/msigdb/human/geneset/GOBP_CELL_DIFFERENTIATION_INVOLVED_IN_METANEPHROS_DEVELOPMENT	ADIPOQ	CD34	CTNNB1	GDNF	GREM1	LAMB2	LGR4	LIF	NPHS2	OSR1	PAX2	PAX8	PDGFB	POU3F3	SALL1	SIX2	SMO	STAT1	TCF21	WNT4	WNT9B	WWTR1	YAP1
GOBP_CELL_DIFFERENTIATION_INVOLVED_IN_PHENOTYPIC_SWITCHING	https://www.gsea-msigdb.org/gsea/msigdb/human/geneset/GOBP_CELL_DIFFERENTIATION_INVOLVED_IN_PHENOTYPIC_SWITCHING	DNMT1	FGF9	MIR140	MIR18A	SOD2
GOBP_CELL_DIFFERENTIATION_IN_HINDBRAIN	https://www.gsea-msigdb.org/gsea/msigdb/human/geneset/GOBP_CELL_DIFFERENTIATION_IN_HINDBRAIN	AGTPBP1	ATP7A	CBLN1	CEND1	FAIM2	GATA2	GRID2	HERC1	KNDC1	LDB1	LHX1	LHX5	MTPN	NOG	OPHN1	PHOX2B	PROX1	RORA	SKOR2	SLC25A46	TTC21B	TTLL1	WNT7A
GOBP_CELL_DIFFERENTIATION_IN_SPINAL_CORD	https://www.gsea-msigdb.org/gsea/msigdb/human/geneset/GOBP_CELL_DIFFERENTIATION_IN_SPINAL_CORD	ABT1	ASCL1	CLN8	DBX1	DLL4	DMRT3	DRAXIN	DYNC2H1	FOXN4	GATA2	GBX1	GDF7	GIGYF2	GLI2	GLI3	GSX1	GSX2	HOXC10	HOXD10	IFT172	ISL1	ISL2	LBX1	LHX1	LHX3	LHX4	LHX5	LMO4	MDGA1	MDGA2	MNX1	NKX2-2	NOTCH1	OLIG2	OLIG3	PHOX2A	PTCH1	SCYL1	SCYL3	SHH	SOX1	SOX13	SOX6	SUFU	TAL1	TBX20	TCTN1	WNT1
GOBP_CELL_DIVISION	https://www.gsea-msigdb.org/gsea/msigdb/human/geneset/GOBP_CELL_DIVISION	AATF	ABRAXAS2	ACTR2	ACTR3	ACTR8	AHCTF1	AKNA	ALKBH4	ANAPC1	ANAPC10	ANAPC11	ANAPC13	ANAPC15	ANAPC16	ANAPC2	ANAPC4	ANAPC5	ANAPC7	ANK3	ANKLE2	ANKRD53	ANLN	ANXA11	APC	ARF1	ARF6	ARHGEF2	ARL3	ARL8A	ARL8B	ARPP19	ASPM	AURKA	AURKB	AURKC	BABAM1	BABAM2	BBS4	BCAR1	BCL2L1	BECN1	BIN3	BIRC5	BIRC6	BLM	BMI1	BOD1	BOD1L2
GOBP_CELL_FATE_COMMITMENT	https://www.gsea-msigdb.org/gsea/msigdb/human/geneset/GOBP_CELL_FATE_COMMITMENT	ACVR1	APC	APC2	AR	ARHGEF2	ARX	ASCL1	ATOH1	ATOH7	BARHL2	BATF	BCL11B	BCL2	BHLHA15	BHLHE22	BHLHE23	BMP2	BMP4	BMPR1A	BRAF	CASP3	CDC42	CDC73	CDON	CHD3	CHD4	CTNNB1	CTR9	CTSL	CYP26B1	DBX1	DHH	DKK1	DLL1	DLL4	DLX1	DLX2	DMRT3	DMRTA2	DOCK7	DSCAML1	EBF2	EDN1	EDNRA	EHMT2	EOMES	EPAS1	EPOP
GOBP_CELL_FATE_COMMITMENT_INVOLVED_IN_FORMATION_OF_PRIMARY_GERM_LAYER	https://www.gsea-msigdb.org/gsea/msigdb/human/geneset/GOBP_CELL_FATE_COMMITMENT_INVOLVED_IN_FORMATION_OF_PRIMARY_GERM_LAYER	BMP4	BMPR1A	CDC73	CTNNB1	CTR9	DKK1	EOMES	ETS2	EYA1	EYA2	FOXC2	FZD7	GATA6	HNF1B	HOXA11	KLF4	LEO1	MESP1	NANOG	NODAL	PAF1	PAX2	POU5F1	RTF1	SFRP2	SIX2	SMAD1	SOX17	SOX2	TBX6	TRIM15	WNT3A
GOBP_CELL_FATE_COMMITMENT_INVOLVED_IN_PATTERN_SPECIFICATION	https://www.gsea-msigdb.org/gsea/msigdb/human/geneset/GOBP_CELL_FATE_COMMITMENT_INVOLVED_IN_PATTERN_SPECIFICATION	ASCL1	DBX1	DLL4	DMRT3	FOXN4	GLI2	GLI3	LHX3	NKX2-2	SOX1	SUFU
GOBP_CELL_FATE_DETERMINATION	https://www.gsea-msigdb.org/gsea/msigdb/human/geneset/GOBP_CELL_FATE_DETERMINATION	ASCL1	ATOH1	BARHL2	BMP4	CDC42	CTNNB1	CYP26B1	DLL1	DSCAML1	EBF2	FEZF2	FOXG1	GATA2	GATA3	GATA6	HES1	HOXA2	IFRD1	ISL1	JAG1	KLF4	LBX1	MCL1	MEF2C	MESP1	MYOD1	NKX2-2	NKX6-3	NOTCH2	NOTCH4	PAX2	PAX6	PROX1	PRRX1	PTCH1	PTCH2	SOX17	TBX2	TNXB	TRIM15	WNT1	WNT7A
GOBP_CELL_FATE_SPECIFICATION	https://www.gsea-msigdb.org/gsea/msigdb/human/geneset/GOBP_CELL_FATE_SPECIFICATION	APC	APC2	AR	ASCL1	ATOH1	BMPR1A	CDON	CHD3	CHD4	CTNNB1	DBX1	DHH	DKK1	DLL1	DMRT3	DMRTA2	EHMT2	EOMES	ESRP1	EYA1	EYA2	FEV	FGF2	FKBP8	FOXA1	FOXA2	FOXI3	FZD7	GATAD2A	GATAD2B	GLI2	GLI3	GSC	GSX2	HDAC1	HDAC2	HNF1B	HOXA11	HOXA13	HOXC10	HOXD10	IHH	ISL1	ISL2	ITGB1	LHX3	LMO4	MBD3
GOBP_CELL_FATE_SPECIFICATION_INVOLVED_IN_PATTERN_SPECIFICATION	https://www.gsea-msigdb.org/gsea/msigdb/human/geneset/GOBP_CELL_FATE_SPECIFICATION_INVOLVED_IN_PATTERN_SPECIFICATION	DBX1	DMRT3	GLI2	GLI3	LHX3	SOX1	SUFU
GOBP_CELL_GROWTH	https://www.gsea-msigdb.org/gsea/msigdb/human/geneset/GOBP_CELL_GROWTH	ABL1	ACVR1B	ACVRL1	ADAM10	ADAM15	ADAM17	ADCY10	ADIPOR1	ADNP	ADRA1A	AGT	AGTR1	AGTR2	AKAP6	AKT1	ALCAM	ANAPC2	APOE	APP	ARHGAP4	ARHGEF11	ARIH2	ARMC12	ATAD3A	AURKA	AUTS2	AVP	AVPR1A	BAP1	BARHL2	BCAR1	BCL11A	BCL2	BCL6	BDKRB1	BDNF	BIN3	BLTP1	BMP10	BMPR2	BRAT1	BRCA1	BST2	BTG1	C8orf44-SGK3	C9orf72	CACNG7	CAMK2D
GOBP_CELL_JUNCTION_ASSEMBLY	https://www.gsea-msigdb.org/gsea/msigdb/human/geneset/GOBP_CELL_JUNCTION_ASSEMBLY	ABI3	ABL1	ACE	ACE2	ACHE	ACTB	ACTG1	ACTN1	ACTN2	ACTN3	ACVRL1	ADD2	ADGRB1	ADGRB3	ADGRF1	ADGRL3	ADNP	AFDN	AGRN	AGT	AJUBA	AMIGO1	AMIGO2	AMIGO3	ANK2	APC	APLNR	APOD	APP	ARF6	ARHGAP6	ARHGEF15	ARHGEF7	ARHGEF9	ARL2	ARMCX5-GPRASP2	ARVCF	ASIC2	BCL2	BCR	BDNF	BSN	C1QL2	C1QL3	CAMSAP3	CAPZA1	CAV1	CBLN1
GOBP_CELL_JUNCTION_DISASSEMBLY	https://www.gsea-msigdb.org/gsea/msigdb/human/geneset/GOBP_CELL_JUNCTION_DISASSEMBLY	ABCC8	ADGRB3	ARF6	C1QA	C1QB	C1QC	C1QL1	C3	CX3CL1	CX3CR1	DKK1	DUSP3	EPHA4	FER	IQSEC1	ITGAM	ITGB1	MAP4K4	MAPRE2	PIK3R1	PLXNC1	PRICKLE1	SNAI2	STON1	TGFB3	TGFBR1	TREM2
GOBP_CELL_JUNCTION_MAINTENANCE	https://www.gsea-msigdb.org/gsea/msigdb/human/geneset/GOBP_CELL_JUNCTION_MAINTENANCE	ADGRB3	APPL1	ARF6	BSN	C1QL1	CAMSAP3	CBLN1	CBLN2	CBLN3	CD177	CHCHD10	CLDN1	CLDN3	CNTNAP1	CSF1R	CTBP2	DCTN1	DLG1	ERC1	ERC2	F2R	F2RL1	FERMT2	INAVA	ITGB3	KIFC3	KIRREL1	MTSS1	MYADM	NLGN1	NLGN2	OPHN1	PARD6A	PCLO	PLEKHA7	PLXNA4	PRTN3	RAB3A	RAPSN	SDF4	SHANK1	SHANK2	SORT1	SYNGAP1	TJP1	WHRN
GOBP_CELL_JUNCTION_ORGANIZATION	https://www.gsea-msigdb.org/gsea/msigdb/human/geneset/GOBP_CELL_JUNCTION_ORGANIZATION	ABCC8	ABHD17A	ABHD17B	ABHD17C	ABI2	ABI3	ABL1	ACE	ACE2	ACHE	ACTB	ACTBL2	ACTG1	ACTL9	ACTN1	ACTN2	ACTN3	ACVRL1	ADAM10	ADD1	ADD2	ADGRB1	ADGRB3	ADGRF1	ADGRL1	ADGRL3	ADNP	AFDN	AFG3L2	AGRN	AGT	AJM1	AJUBA	AKT1	ALS2	AMIGO1	AMIGO2	AMIGO3	ANAPC2	ANK2	ANK3	APBB2	APC	APLNR	APOD	APOE	APP	APPL1
GOBP_CELL_KILLING	https://www.gsea-msigdb.org/gsea/msigdb/human/geneset/GOBP_CELL_KILLING	AGER	AP1G1	APOL1	ARG1	ARL8B	ARRB2	ATN1	AZU1	B2M	BCL2L1	C3	C5	C6	C7	C8A	C8B	C8G	C9	CADM1	CAMP	CCL13	CD160	CD1A	CD1B	CD1C	CD1D	CD1E	CD2	CD226	CD55	CD59	CD5L	CEACAM1	CEBPG	CFH	CFHR1	CFHR2	CFHR5	CHGA	CLEC12B	CLEC2A	CLEC7A	CORO1A	CR1	CR1L	CRK	CRTAM	CST11
GOBP_CELL_MATRIX_ADHESION	https://www.gsea-msigdb.org/gsea/msigdb/human/geneset/GOBP_CELL_MATRIX_ADHESION	ABL1	ACER2	ACTG1	ACTN1	ACTN2	ACTN3	ACVRL1	ADAM15	ADAM9	ADAMTS12	ADAMTS13	ADAMTS9	AJAP1	AJUBA	ANGPTL3	APOD	ARHGAP6	ARHGEF7	BCAM	BCL2	BCL2L11	BCL6	BCR	BST1	CAMSAP3	CASK	CCL21	CCL25	CCL28	CCN2	CCR7	CD34	CD36	CD3E	CD44	CD63	CD96	CDH11	CDH13	CDK5	CDK6	CDKN2A	CEACAM6	CIB1	CLASP1	CLASP2	COL13A1	COL16A1
GOBP_CELL_MATURATION	https://www.gsea-msigdb.org/gsea/msigdb/human/geneset/GOBP_CELL_MATURATION	ABHD2	ACTL6B	ADGRB3	AGRN	AKR1B1	ANG	ANGPTL8	ANKS1A	APP	ASCL1	AURKA	AXL	B4GALT5	B4GALT6	BAP1	BCL11A	BCL2	BFSP1	BFSP2	BHLHA15	BNC1	BRCA2	BRD1	BSPH1	BTK	C1QA	C1QL1	C2CD6	C3	CABYR	CATSPER2	CATSPER3	CATSPER4	CATSPERD	CATSPERE	CATSPERZ	CBFB	CCL19	CCL21	CCR6	CDC25B	CDKN1A	CDKN1C	CEBPA	CFTR	CLEC7A	CLN5	CNTN2
GOBP_CELL_MIGRATION_INVOLVED_IN_GASTRULATION	https://www.gsea-msigdb.org/gsea/msigdb/human/geneset/GOBP_CELL_MIGRATION_INVOLVED_IN_GASTRULATION	AMOT	APELA	CER1	CRB2	EPB41L5	FGF8	GPC3	LRP5	MEGF8	MIXL1	NODAL	RIC8A	SOX17	WNT11	WNT5A
GOBP_CELL_MIGRATION_INVOLVED_IN_HEART_DEVELOPMENT	https://www.gsea-msigdb.org/gsea/msigdb/human/geneset/GOBP_CELL_MIGRATION_INVOLVED_IN_HEART_DEVELOPMENT	BMP4	BMP7	BVES	CDC42	DCHS1	EDN1	EDNRA	ENG	FLRT3	FOLR1	HAND2	MESP1	MIR1-1	NDRG4	NOTCH1	PDGFRB	PITX2	SEMA3C	SNAI2	TBX5	TWIST1
GOBP_CELL_MIGRATION_INVOLVED_IN_KIDNEY_DEVELOPMENT	https://www.gsea-msigdb.org/gsea/msigdb/human/geneset/GOBP_CELL_MIGRATION_INVOLVED_IN_KIDNEY_DEVELOPMENT	ADIPOQ	GDF6	PDGFA	PDGFB	PDGFRB	VANGL2
GOBP_CELL_MIGRATION_INVOLVED_IN_METANEPHROS_DEVELOPMENT	https://www.gsea-msigdb.org/gsea/msigdb/human/geneset/GOBP_CELL_MIGRATION_INVOLVED_IN_METANEPHROS_DEVELOPMENT	ADIPOQ	GDF6	PDGFA	PDGFB	PDGFRB
GOBP_CELL_MIGRATION_INVOLVED_IN_SPROUTING_ANGIOGENESIS	https://www.gsea-msigdb.org/gsea/msigdb/human/geneset/GOBP_CELL_MIGRATION_INVOLVED_IN_SPROUTING_ANGIOGENESIS	ABL1	ADTRP	AKT1	AKT3	ANXA1	CARD10	CIB1	CLEC14A	DLL4	EFNB2	EGR3	EPHB4	FBXW7	FGF2	FGFBP1	FOXC2	GATA2	GPLD1	GREM1	HDAC5	HDAC7	HDAC9	HMOX1	ITGB1	ITGB1BP1	JCAD	KDR	KLF4	MAP2K5	MAP3K3	MEOX2	MIA3	MIR101-1	MIR10A	MIR10B	MIR126	MIR132	MIR146A	MIR149	MIR150	MIR15A	MIR16-1	MIR188	MIR193A	MIR196A1	MIR199A1	MIR19B1	MIR200C
GOBP_CELL_MIGRATION_IN_HINDBRAIN	https://www.gsea-msigdb.org/gsea/msigdb/human/geneset/GOBP_CELL_MIGRATION_IN_HINDBRAIN	ARL13B	ATP1B2	CEND1	CTNNA2	DAB1	EPHB1	EPHB2	FLNA	ITGB1	LEF1	NHLH2	PHOX2B	PLXNA2	POU4F1	RERE	SEMA4C	TTBK2
GOBP_CELL_MORPHOGENESIS	https://www.gsea-msigdb.org/gsea/msigdb/human/geneset/GOBP_CELL_MORPHOGENESIS	ABI1	ABI2	ABI3	ABITRAM	ABL1	ACTB	ACTBL2	ACTG1	ACTL9	ACTN1	ADAM17	ADAM8	ADARB1	ADCY1	ADCY10	ADGRB1	ADGRB3	ADNP	ADORA2A	AFG3L2	AGO4	ALCAM	ALDOA	ALS2	AMIGO1	ANAPC2	ANK3	ANKRD24	ANKRD27	ANO1	ANOS1	ANXA1	AP3B1	APBB1	APLP1	APLP2	APOE	APP	AR	ARAP1	ARC	ARHGAP15	ARHGAP18	ARHGAP33	ARHGAP35	ARHGAP4	ARHGAP44	ARHGEF18
GOBP_CELL_MORPHOGENESIS_INVOLVED_IN_NEURON_DIFFERENTIATION	https://www.gsea-msigdb.org/gsea/msigdb/human/geneset/GOBP_CELL_MORPHOGENESIS_INVOLVED_IN_NEURON_DIFFERENTIATION	ABI1	ABI2	ABI3	ABITRAM	ABL1	ACTB	ACTBL2	ACTG1	ACTL9	ADAM17	ADARB1	ADCY1	ADCY10	ADGRB1	ADGRB3	ADNP	AFG3L2	ALCAM	AMIGO1	ANAPC2	ANK3	ANKRD24	ANKRD27	ANOS1	APBB1	APLP1	APLP2	APOE	APP	ARC	ARHGAP33	ARHGAP35	ARHGAP4	ARHGAP44	ARHGEF25	ARHGEF28	ARHGEF40	ARMCX5-GPRASP2	ARTN	ARX	ATL1	ATOH1	ATOH7	ATP8A2	AUTS2	B3GNT2	B4GALT5	B4GALT6
GOBP_CELL_MOTILITY	https://www.gsea-msigdb.org/gsea/msigdb/human/geneset/GOBP_CELL_MOTILITY	AAMP	ABCC1	ABCC8	ABHD2	ABHD6	ABI2	ABI3	ABL1	ABL2	ACAP3	ACE	ACKR2	ACKR3	ACKR4	ACTA2	ACTB	ACTBL2	ACTG1	ACTL9	ACTN4	ACTR3	ACVR1	ACVR1B	ACVR1C	ACVRL1	ADA	ADAM10	ADAM15	ADAM17	ADAM8	ADAM9	ADAMTS1	ADAMTS12	ADAMTS9	ADARB1	ADCY3	ADD2	ADGRA2	ADGRB1	ADGRE2	ADGRG1	ADGRG3	ADGRL3	ADIPOQ	ADIPOR1	ADORA1	ADORA3	ADRA2A
GOBP_CELL_MOTILITY_INVOLVED_IN_CEREBRAL_CORTEX_RADIAL_GLIA_GUIDED_MIGRATION	https://www.gsea-msigdb.org/gsea/msigdb/human/geneset/GOBP_CELL_MOTILITY_INVOLVED_IN_CEREBRAL_CORTEX_RADIAL_GLIA_GUIDED_MIGRATION	BMERB1	DAB2IP	P2RY12	SRGAP2	SRGAP2C	SUN1	SUN2	SYNE2
GOBP_CELL_PART_MORPHOGENESIS	https://www.gsea-msigdb.org/gsea/msigdb/human/geneset/GOBP_CELL_PART_MORPHOGENESIS	ABI1	ABI2	ABI3	ABITRAM	ABL1	ACTB	ACTBL2	ACTG1	ACTL9	ADAM17	ADARB1	ADCY1	ADCY10	ADGRB1	ADGRB3	ADNP	ADORA2A	AFG3L2	ALCAM	ALS2	AMIGO1	ANAPC2	ANK3	ANKRD27	ANO1	ANOS1	APBB1	APLP1	APLP2	APOE	APP	ARC	ARHGAP33	ARHGAP35	ARHGAP4	ARHGAP44	ARHGEF25	ARHGEF28	ARHGEF40	ARHGEF7	ARMCX5-GPRASP2	ARPIN	ARTN	ARX	ATL1	ATOH1	ATOH7	ATP7A
GOBP_CELL_PROJECTION_ASSEMBLY	https://www.gsea-msigdb.org/gsea/msigdb/human/geneset/GOBP_CELL_PROJECTION_ASSEMBLY	ABCC4	ABI2	ABI3	ABITRAM	ABL1	ABLIM1	ABLIM2	ABLIM3	ACTN2	ACTR2	ACTR3	ADAMTS16	AGRN	AHI1	AIF1	AIF1L	AJUBA	AKAP4	AKIRIN1	AKT1	ALPK1	ANLN	ANO6	APC	ARAP1	ARF4	ARF6	ARFIP2	ARHGAP24	ARHGAP35	ARHGAP44	ARHGEF26	ARHGEF4	ARHGEF6	ARHGEF7	ARL13A	ARL13B	ARL3	ARL6	ARMC12	ARMC2	ARMC9	ARPC2	ASAP1	ATAT1	ATG3	ATG5	ATMIN
GOBP_CELL_PROJECTION_ORGANIZATION	https://www.gsea-msigdb.org/gsea/msigdb/human/geneset/GOBP_CELL_PROJECTION_ORGANIZATION	ABCC4	ABCD1	ABCD2	ABHD17B	ABI1	ABI2	ABI3	ABITRAM	ABL1	ABL2	ABLIM1	ABLIM2	ABLIM3	ACAP3	ACP4	ACTB	ACTBL2	ACTG1	ACTL6B	ACTL9	ACTN2	ACTR2	ACTR3	ADAM17	ADAMTS16	ADARB1	ADCY1	ADCY10	ADCY6	ADCYAP1	ADGRB1	ADGRB3	ADGRF1	ADGRV1	ADM	ADNP	ADORA2A	AFG3L2	AGER	AGRN	AHI1	AIF1	AIF1L	AJUBA	AK7	AKAP4	AKIRIN1	AKT1
GOBP_CELL_PROLIFERATION_INVOLVED_IN_HEART_MORPHOGENESIS	https://www.gsea-msigdb.org/gsea/msigdb/human/geneset/GOBP_CELL_PROLIFERATION_INVOLVED_IN_HEART_MORPHOGENESIS	BMP10	BMPR2	CTNNB1	ENG	EYA1	HAND2	HES1	ISL1	MIR20A	MKS1	NOTCH1	PIM1	PITX2	RBPJ	SIX1	SMAD4	SOX9	TBX3	TBX5	TGFBR2
GOBP_CELL_PROLIFERATION_INVOLVED_IN_KIDNEY_DEVELOPMENT	https://www.gsea-msigdb.org/gsea/msigdb/human/geneset/GOBP_CELL_PROLIFERATION_INVOLVED_IN_KIDNEY_DEVELOPMENT	BMP2	BMP4	BMP7	CFLAR	EGR1	FLCN	GATA3	GPC3	IL6R	ITGB3	LIN28A	MIR125A	MYC	OSR1	PDGFA	PDGFB	PDGFD	PDGFRB	PTCH1	SERPINB7	SHH	STAT1	WT1
GOBP_CELL_PROLIFERATION_INVOLVED_IN_METANEPHROS_DEVELOPMENT	https://www.gsea-msigdb.org/gsea/msigdb/human/geneset/GOBP_CELL_PROLIFERATION_INVOLVED_IN_METANEPHROS_DEVELOPMENT	BMP7	EGR1	GPC3	MYC	OSR1	PDGFRB	PTCH1	SHH	STAT1	WT1
GOBP_CELL_PROLIFERATION_IN_BONE_MARROW	https://www.gsea-msigdb.org/gsea/msigdb/human/geneset/GOBP_CELL_PROLIFERATION_IN_BONE_MARROW	ACE	FGFR2	HMGA2	LEF1	LIPA	MAP3K3	MIR10A	MIR188	MIR27B	PTH	SETD4
GOBP_CELL_PROLIFERATION_IN_FOREBRAIN	https://www.gsea-msigdb.org/gsea/msigdb/human/geneset/GOBP_CELL_PROLIFERATION_IN_FOREBRAIN	AKNA	ARX	BCL11B	CEP120	DCT	DISC1	DIXDC1	DOCK7	EMX2	FGF8	FGFR2	GLI3	HOOK3	IGF2BP1	KIF14	LHX5	NFIB	NUMB	NUMBL	PAX6	PCM1	POU3F2	POU3F3	RRM1	SIX3	WNT3A	WNT7A
GOBP_CELL_PROLIFERATION_IN_HINDBRAIN	https://www.gsea-msigdb.org/gsea/msigdb/human/geneset/GOBP_CELL_PROLIFERATION_IN_HINDBRAIN	ATF5	CEND1	EGF	FGF2	GBX2	GLI1	GPR37L1	LHX1	LHX5	PSMG1	RERE	RORA	SHH	SKOR2	SLC6A4	SMO
GOBP_CELL_PROLIFERATION_IN_MIDBRAIN	https://www.gsea-msigdb.org/gsea/msigdb/human/geneset/GOBP_CELL_PROLIFERATION_IN_MIDBRAIN	FZD3	FZD6	PITX3	RYK	WNT1	WNT2	WNT3A	WNT5A
GOBP_CELL_RECOGNITION	https://www.gsea-msigdb.org/gsea/msigdb/human/geneset/GOBP_CELL_RECOGNITION	ACR	ADAM18	ADAM2	ADAM32	ADGRB1	ALDOA	AMIGO1	APP	ARHGAP35	ASTL	ATP8B3	B4GALT1	C4B	C4BPA	C4BPB	CADM1	CASP3	CCL19	CCL21	CCR7	CCT2	CCT3	CCT4	CCT5	CCT7	CCT8	CD209	CD226	CD36	CD5	CD6	CD81	CD9	CDK5R1	CFP	CLEC4M	CLEC7A	CLGN	CNR1	CNTN2	CNTN4	CNTN6	CNTNAP2	CNTNAP3	COLEC10	COLEC11	COLEC12	CORO1A
GOBP_CELL_REDOX_HOMEOSTASIS	https://www.gsea-msigdb.org/gsea/msigdb/human/geneset/GOBP_CELL_REDOX_HOMEOSTASIS	APEX1	BOLA1	BOLA2	BOLA2B	BOLA3	CHD6	DDIT3	EGLN2	ERO1A	ERP44	GCLC	GIT1	GLRX2	GLRX3	GLRX5	GPX1	GSR	HVCN1	KRIT1	NFE2L2	NNT	NOS1	NOS2	NOS3	NQO1	PRDX1	PRDX2	PRDX3	PRDX4	PRDX5	PRDX6	SELENOS	SELENOT	SLC11A1	SLC2A10	TXN	TXN2	TXNDC2	TXNRD1	TXNRD2	TXNRD3
GOBP_CELL_SUBSTRATE_ADHESION	https://www.gsea-msigdb.org/gsea/msigdb/human/geneset/GOBP_CELL_SUBSTRATE_ADHESION	ABI3BP	ABL1	ACER2	ACTG1	ACTN1	ACTN2	ACTN3	ACTN4	ACVRL1	ADAM15	ADAM9	ADAMTS12	ADAMTS13	ADAMTS9	AGR2	AJAP1	AJUBA	AKIP1	ALOX15	ANGPT1	ANGPT2	ANGPTL3	ANTXR1	AP1AR	APOA1	APOD	ARHGAP6	ARHGEF7	ARL2	ARPC2	ATP1B2	ATXN3	AXL	BCAM	BCL2	BCL2L11	BCL6	BCR	BRAF	BST1	BVES	C1QBP	CALR	CAMSAP3	CARMIL1	CASK	CASS4	CCDC80
GOBP_CELL_SUBSTRATE_JUNCTION_DISASSEMBLY	https://www.gsea-msigdb.org/gsea/msigdb/human/geneset/GOBP_CELL_SUBSTRATE_JUNCTION_DISASSEMBLY	ARF6	DUSP3	IQSEC1	MAP4K4	MAPRE2	PIK3R1	PRICKLE1	STON1
GOBP_CELL_SUBSTRATE_JUNCTION_ORGANIZATION	https://www.gsea-msigdb.org/gsea/msigdb/human/geneset/GOBP_CELL_SUBSTRATE_JUNCTION_ORGANIZATION	ABL1	ACTG1	ACTN1	ACTN2	ACTN3	ACVRL1	AJUBA	APOD	ARF6	ARHGAP6	ARHGEF7	BCL2	BCR	CAMSAP3	CDH11	CLASP1	CLASP2	COL16A1	COL17A1	CORO1C	CORO2B	CTTN	DAPK3	DLC1	DMTN	DST	DUSP22	DUSP3	EFNA5	EPB41L5	EPHA3	FAM107A	FERMT2	FMN1	FN1	GPM6B	GREM1	HRG	IQSEC1	ITGA2	ITGA5	ITGA6	ITGB1BP1	ITGB3	ITGB4	KDR	LAMA3	LAMC1
GOBP_CELL_SURFACE_PATTERN_RECOGNITION_RECEPTOR_SIGNALING_PATHWAY	https://www.gsea-msigdb.org/gsea/msigdb/human/geneset/GOBP_CELL_SURFACE_PATTERN_RECOGNITION_RECEPTOR_SIGNALING_PATHWAY	ACOD1	APPL1	APPL2	BPIFB1	CD14	CHUK	COLEC10	COLEC11	CYBA	DAB2IP	ECSIT	F2RL1	FCN1	FCN2	FCN3	FFAR2	FLOT1	IFI35	IRAK1	IRAK2	IRAK4	LBP	LGALS9	LILRA2	LTF	LY96	LYN	MAP3K7	MBL2	MFHAS1	MIR140	MIR146A	MIR149	MIR20A	MIR708	MYD88	NAGLU	NFKBIA	NINJ1	NMI	NOD2	NR1D1	NR1H3	OAS1	PELI1	PIK3AP1	PIK3R1	PJA2
GOBP_CELL_SURFACE_RECEPTOR_SIGNALING_PATHWAY_INVOLVED_IN_HEART_DEVELOPMENT	https://www.gsea-msigdb.org/gsea/msigdb/human/geneset/GOBP_CELL_SURFACE_RECEPTOR_SIGNALING_PATHWAY_INVOLVED_IN_HEART_DEVELOPMENT	ALPK2	BMP2	CTNNB1	DKK1	DLL4	GALNT11	HAND2	HEY1	HEY2	HEYL	JAG1	MESP1	MIR19B1	MKS1	MSX1	MSX2	NOTCH1	NOTCH2	RBPJ	SNAI1	SNAI2	SOX17	WNT11	WNT3A	WNT5A	WNT8A
GOBP_CELL_VOLUME_HOMEOSTASIS	https://www.gsea-msigdb.org/gsea/msigdb/human/geneset/GOBP_CELL_VOLUME_HOMEOSTASIS	ABCB8	ANO6	AQP1	AQP11	AQP4	CCDC51	CLCN3	CLCN6	CLN3	CLNS1A	E2F4	GNB3	KCNMA1	KCNN4	LRRC8A	LRRC8E	NPM1	OXSR1	P2RX7	SCT	SCTR	SHANK3	SLC12A1	SLC12A2	SLC12A3	SLC12A4	SLC12A5	SLC12A6	SLC12A7	SLC12A8	SLC12A9	STK39	TRPV4	WNK1	WNK3
GOBP_CENP_A_CONTAINING_CHROMATIN_ASSEMBLY	https://www.gsea-msigdb.org/gsea/msigdb/human/geneset/GOBP_CENP_A_CONTAINING_CHROMATIN_ASSEMBLY	CENPA	CENPI	CENPN	CENPP	CENPW	HJURP	ITGB3BP	MIS18A	NASP	OIP5
GOBP_CENTRAL_NERVOUS_SYSTEM_DEVELOPMENT	https://www.gsea-msigdb.org/gsea/msigdb/human/geneset/GOBP_CENTRAL_NERVOUS_SYSTEM_DEVELOPMENT	AARS1	AATK	ABAT	ABCA2	ABCB6	ABL1	ABT1	ACAN	ACKR3	ACTB	ACTL6A	ADAM22	ADAM23	ADARB1	ADGRA2	ADGRG1	ADORA2A	AFF2	AGBL4	AGER	AGTPBP1	AGTR2	AHI1	AIM2	AK8	AKIRIN2	AKNA	AKT3	ALDH1A2	ALDH1A3	ALDH3A2	ALDH5A1	ALK	AMIGO1	AMIGO2	AMIGO3	ANAPC7	ANKLE2	ANP32B	ANXA3	APAF1	APLP1	APLP2	APOD	APP	AQP1	ARCN1	ARHGAP11B
GOBP_CENTRAL_NERVOUS_SYSTEM_MATURATION	https://www.gsea-msigdb.org/gsea/msigdb/human/geneset/GOBP_CENTRAL_NERVOUS_SYSTEM_MATURATION	ARCN1	ATP6AP2	CDK5R1	CDK5R2	CEND1	CX3CR1	RERE
GOBP_CENTRAL_NERVOUS_SYSTEM_MYELIN_FORMATION	https://www.gsea-msigdb.org/gsea/msigdb/human/geneset/GOBP_CENTRAL_NERVOUS_SYSTEM_MYELIN_FORMATION	ABCA2	CNTN1	ERCC2	MAG	MIOS	MOBP	TENM4	TLR2
GOBP_CENTRAL_NERVOUS_SYSTEM_MYELIN_MAINTENANCE	https://www.gsea-msigdb.org/gsea/msigdb/human/geneset/GOBP_CENTRAL_NERVOUS_SYSTEM_MYELIN_MAINTENANCE	CLU	FA2H	MIR26A1	MYRF	PTEN
GOBP_CENTRAL_NERVOUS_SYSTEM_NEURON_AXONOGENESIS	https://www.gsea-msigdb.org/gsea/msigdb/human/geneset/GOBP_CENTRAL_NERVOUS_SYSTEM_NEURON_AXONOGENESIS	ADARB1	ARHGAP35	ARHGEF28	B4GALT5	B4GALT6	C12orf57	CDH11	CHRNB2	DCC	DCLK1	DRAXIN	EPHA4	EPHB1	EPHB2	EPHB3	FBXO45	GLI2	HSP90AA1	HSP90AB1	KIFBP	MYCBP2	NDEL1	NFIB	NIN	NR2E1	NR4A2	PAFAH1B1	PHOX2B	PLXNA4	PRDM8	PTEN	SCN1B	SLIT2	SPG11	SPTBN4	SZT2	TCTN1	TSKU	WDR47
GOBP_CENTRAL_NERVOUS_SYSTEM_NEURON_DEVELOPMENT	https://www.gsea-msigdb.org/gsea/msigdb/human/geneset/GOBP_CENTRAL_NERVOUS_SYSTEM_NEURON_DEVELOPMENT	ADARB1	AGBL4	AGTPBP1	ARHGAP35	ARHGEF28	ARX	ASCL1	ATP7A	B4GALT5	B4GALT6	BRINP1	BTG2	C12orf57	CDH11	CDK5	CHRNB2	CNTN2	DCC	DCLK1	DCLK2	DISC1	DRAXIN	DRD1	DRD2	EPHA4	EPHB1	EPHB2	EPHB3	FBXO45	FEZF2	FGF8	FGFR2	FOXG1	GABRB1	GATA2	GBA2	GBX2	GLI2	HPRT1	HSP90AA1	HSP90AB1	KIFBP	LEP	LHX6	LHX8	MAP2	MAPT	MYCBP2
GOBP_CENTRAL_NERVOUS_SYSTEM_NEURON_DIFFERENTIATION	https://www.gsea-msigdb.org/gsea/msigdb/human/geneset/GOBP_CENTRAL_NERVOUS_SYSTEM_NEURON_DIFFERENTIATION	ABT1	ADARB1	AGBL4	AGTPBP1	ARHGAP35	ARHGEF28	ARX	ASCL1	ATP7A	B2M	B4GALT5	B4GALT6	BCL11B	BMPR1A	BMPR1B	BRINP1	BRINP2	BRINP3	BTG2	C12orf57	C21orf91	CBLN1	CDH11	CDK5	CEND1	CHD5	CHRNB2	CLN8	CNTN2	CSF1R	DBX1	DCC	DCLK1	DCLK2	DISC1	DLL4	DLX1	DLX2	DMRT3	DRAXIN	DRD1	DRD2	DYNC2H1	ELAVL4	EMX1	EOMES	EPHA4	EPHB1
GOBP_CENTRAL_NERVOUS_SYSTEM_PROJECTION_NEURON_AXONOGENESIS	https://www.gsea-msigdb.org/gsea/msigdb/human/geneset/GOBP_CENTRAL_NERVOUS_SYSTEM_PROJECTION_NEURON_AXONOGENESIS	ADARB1	C12orf57	CDH11	CHRNB2	DCC	DCLK1	DRAXIN	EPHA4	EPHB1	EPHB2	EPHB3	FBXO45	GLI2	KIFBP	MYCBP2	NFIB	NIN	NR2E1	NR4A2	PAFAH1B1	PLXNA4	PRDM8	SCN1B	SLIT2	SPG11	SPTBN4	SZT2	TSKU	WDR47
GOBP_CENTRIOLE_ASSEMBLY	https://www.gsea-msigdb.org/gsea/msigdb/human/geneset/GOBP_CENTRIOLE_ASSEMBLY	ALMS1	BRCA1	C10orf90	C2CD3	CCDC57	CCDC61	CCDC78	CCP110	CDC20B	CDK2	CDK5RAP2	CENPJ	CEP120	CEP135	CEP152	CEP192	CEP295	CEP295NL	CEP44	CEP63	CEP72	CEP76	CEP85	CETN1	CETN2	CHMP2A	CNTROB	DEUP1	E2F4	KAT2A	KAT2B	KIAA0753	MCIDAS	MDM1	NPM1	NUP62	OFD1	PLK2	PLK4	POC1B	PPP1R35	RBM14	RTTN	SASS6	SPICE1	STIL	TRIM37	VPS4B
GOBP_CENTRIOLE_CENTRIOLE_COHESION	https://www.gsea-msigdb.org/gsea/msigdb/human/geneset/GOBP_CENTRIOLE_CENTRIOLE_COHESION	CCDC102B	CEP135	CEP250	CEP44	CEP68	CNTLN	CROCC	CTNNB1	DCTN1	KIF3A	NEK2	NIN	ODF2	RTTN	SGO1
GOBP_CENTRIOLE_ELONGATION	https://www.gsea-msigdb.org/gsea/msigdb/human/geneset/GOBP_CENTRIOLE_ELONGATION	C2CD3	CCP110	CENPJ	CEP120	CEP295	CHMP2A	PPP1R35	VPS4B
GOBP_CENTROMERE_COMPLEX_ASSEMBLY	https://www.gsea-msigdb.org/gsea/msigdb/human/geneset/GOBP_CENTROMERE_COMPLEX_ASSEMBLY	CENPA	CENPC	CENPE	CENPF	CENPH	CENPI	CENPK	CENPN	CENPO	CENPP	CENPT	CENPV	CENPW	CENPX	DLGAP5	H3-3A	H3-3B	HJURP	ITGB3BP	KNTC1	MIS12	MIS18A	NASP	OIP5	POGZ	RB1	RNF4	SENP6	SUGT1	TRAPPC12
GOBP_CENTROMERIC_SISTER_CHROMATID_COHESION	https://www.gsea-msigdb.org/gsea/msigdb/human/geneset/GOBP_CENTROMERIC_SISTER_CHROMATID_COHESION	AXIN2	BOD1	BUB1	BUB1B	CTCF	CTNNB1	MEIKIN	NAA10	NAA50	PPP2R1A	SGO1
GOBP_CENTROSOME_DUPLICATION	https://www.gsea-msigdb.org/gsea/msigdb/human/geneset/GOBP_CENTROSOME_DUPLICATION	ALMS1	ARHGEF10	BRCA1	BRCA2	BRSK1	C10orf90	C2CD3	CCDC57	CCNF	CCP110	CDK2	CDK5RAP2	CENATAC	CENPJ	CEP120	CEP131	CEP135	CEP152	CEP192	CEP295	CEP295NL	CEP44	CEP63	CEP72	CEP76	CEP85	CETN1	CETN2	CHMP1A	CHMP1B	CHMP2A	CHMP2B	CHMP3	CHMP4B	CHMP4C	CHMP5	CHORDC1	CKAP5	CNTROB	DEUP1	FBXW5	GEN1	KAT2A	KAT2B	KIAA0753	MDM1	NAT10	NDC80
GOBP_CENTROSOME_SEPARATION	https://www.gsea-msigdb.org/gsea/msigdb/human/geneset/GOBP_CENTROSOME_SEPARATION	AURKA	CEP85	CHEK1	CNTROB	KIF11	KIF25	KIF3B	MAP9	NDE1	NDEL1	NEK2	NSFL1C	NUP62	RANBP1	UBXN2B
GOBP_CERAMIDE_1_PHOSPHATE_TRANSPORT	https://www.gsea-msigdb.org/gsea/msigdb/human/geneset/GOBP_CERAMIDE_1_PHOSPHATE_TRANSPORT	CERT1	CPTP	GLTP	GLTPD2	MTTP	PLEKHA8	PLEKHA8P1
GOBP_CERAMIDE_BIOSYNTHETIC_PROCESS	https://www.gsea-msigdb.org/gsea/msigdb/human/geneset/GOBP_CERAMIDE_BIOSYNTHETIC_PROCESS	AGK	ALOX12B	ALOXE3	ASAH1	ASAH2	B3GALT1	B3GALT2	B3GALT4	B4GALNT1	B4GALT3	B4GALT4	B4GALT5	B4GALT6	C20orf173	CCN1	CERS1	CERS2	CERS3	CERS4	CERS5	CERS6	CLN8	CYP4F22	DEGS1	DEGS2	ELOVL1	ENPP7	FA2H	GAL3ST1	GBA1	ORMDL1	ORMDL2	ORMDL3	P2RX1	P2RX7	PLA2G6	PNPLA1	PRKAA1	PRKCD	SAMD8	SGMS1	SGMS2	SIRT3	SMPD1	SMPD2	SMPD4	SPHK1	SPHK2
GOBP_CERAMIDE_CATABOLIC_PROCESS	https://www.gsea-msigdb.org/gsea/msigdb/human/geneset/GOBP_CERAMIDE_CATABOLIC_PROCESS	ACER1	ACER2	ACER3	ASAH1	ASAH2	ASAH2B	CEL	GALC	GBA1	GBA2	GBA3	GLA	GM2A	HEXA	HEXB	LCT	NEU1	NEU2	NEU3	NEU4	PRKCD
GOBP_CERAMIDE_METABOLIC_PROCESS	https://www.gsea-msigdb.org/gsea/msigdb/human/geneset/GOBP_CERAMIDE_METABOLIC_PROCESS	ABCA12	ABCA2	ACER1	ACER2	ACER3	AGK	ALOX12B	ALOXE3	ASAH1	ASAH2	ASAH2B	B3GALT1	B3GALT2	B3GALT4	B4GALNT1	B4GALT3	B4GALT4	B4GALT5	B4GALT6	C20orf173	CCN1	CEL	CERK	CERS1	CERS2	CERS3	CERS4	CERS5	CERS6	CERT1	CLN6	CLN8	CYP4F22	DEGS1	DEGS2	ELOVL1	ENPP7	FA2H	FUT3	FUT5	FUT6	FUT7	GAL3ST1	GALC	GBA1	GBA2	GBA3	GLA
GOBP_CERAMIDE_TRANSPORT	https://www.gsea-msigdb.org/gsea/msigdb/human/geneset/GOBP_CERAMIDE_TRANSPORT	ABCA12	ABCA13	ABCA2	ABCB1	ABCB4	CERT1	CPTP	GLTP	GLTPD2	MTTP	OSBP	PLEKHA8	PLEKHA8P1	PLTP	PSAP	SGPP1	VAPA
GOBP_CEREBELLAR_CORTEX_DEVELOPMENT	https://www.gsea-msigdb.org/gsea/msigdb/human/geneset/GOBP_CEREBELLAR_CORTEX_DEVELOPMENT	AARS1	AGTPBP1	ARCN1	ATP7A	B4GALT2	CBLN1	CDK5	CEND1	CLP1	COQ8B	DLL1	EZH2	FAIM2	GBA1	GLI1	GLI2	GRID2	HERC1	HSPA5	KIF14	KLHL1	KNDC1	LDB1	LHX1	LHX5	MAP2K1	MDK	MTPN	NAGLU	NEUROD2	OGDH	OPHN1	PROX1	PTPN11	RERE	RORA	SERPINE2	SEZ6	SKOR2	SLC25A46	SMO	SPTBN2	TRNP1	TTBK2	TTC21B	TTLL1	TUBA1A	UQCRQ
GOBP_CEREBELLAR_CORTEX_FORMATION	https://www.gsea-msigdb.org/gsea/msigdb/human/geneset/GOBP_CEREBELLAR_CORTEX_FORMATION	AGTPBP1	ATP7A	CBLN1	CDK5	CEND1	DLL1	FAIM2	GBA1	GRID2	HERC1	KNDC1	LDB1	LHX1	LHX5	MAP2K1	MTPN	OPHN1	PROX1	PTPN11	RORA	SKOR2	SLC25A46	TTC21B	TTLL1	WHRN	WNT7A
GOBP_CEREBELLAR_CORTEX_MORPHOGENESIS	https://www.gsea-msigdb.org/gsea/msigdb/human/geneset/GOBP_CEREBELLAR_CORTEX_MORPHOGENESIS	AGTPBP1	ATP7A	CBLN1	CDK5	CEND1	COQ8B	DLL1	FAIM2	GBA1	GLI1	GLI2	GRID2	HERC1	KIF14	KNDC1	LDB1	LHX1	LHX5	MAP2K1	MTPN	OPHN1	PROX1	PTPN11	RORA	SERPINE2	SKOR2	SLC25A46	SMO	SPTBN2	TRNP1	TTC21B	TTLL1	TUBA1A	WHRN	WNT7A	ZNF365
GOBP_CEREBELLAR_GRANULAR_LAYER_DEVELOPMENT	https://www.gsea-msigdb.org/gsea/msigdb/human/geneset/GOBP_CEREBELLAR_GRANULAR_LAYER_DEVELOPMENT	CBLN1	CEND1	FAIM2	GRID2	KIF14	KNDC1	MDK	MTPN	OPHN1	PROX1	SERPINE2	TTBK2	WNT7A
GOBP_CEREBELLAR_GRANULAR_LAYER_FORMATION	https://www.gsea-msigdb.org/gsea/msigdb/human/geneset/GOBP_CEREBELLAR_GRANULAR_LAYER_FORMATION	CBLN1	GRID2	KNDC1	MTPN	OPHN1	PROX1	WNT7A
GOBP_CEREBELLAR_GRANULAR_LAYER_MORPHOGENESIS	https://www.gsea-msigdb.org/gsea/msigdb/human/geneset/GOBP_CEREBELLAR_GRANULAR_LAYER_MORPHOGENESIS	CBLN1	GRID2	KIF14	KNDC1	MTPN	OPHN1	PROX1	SERPINE2	WNT7A
GOBP_CEREBELLAR_PURKINJE_CELL_GRANULE_CELL_PRECURSOR_CELL_SIGNALING_INVOLVED_IN_REGULATION_OF_GRANULE_CELL_PRECURSOR_CELL_PROLIFERATION	https://www.gsea-msigdb.org/gsea/msigdb/human/geneset/GOBP_CEREBELLAR_PURKINJE_CELL_GRANULE_CELL_PRECURSOR_CELL_SIGNALING_INVOLVED_IN_REGULATION_OF_GRANULE_CELL_PRECURSOR_CELL_PROLIFERATION	GLI1	LHX1	LHX5	SHH	SMO
GOBP_CEREBELLAR_PURKINJE_CELL_LAYER_DEVELOPMENT	https://www.gsea-msigdb.org/gsea/msigdb/human/geneset/GOBP_CEREBELLAR_PURKINJE_CELL_LAYER_DEVELOPMENT	AARS1	AGTPBP1	ARCN1	ATP7A	B4GALT2	CEND1	COQ8B	DLL1	FAIM2	GBA1	HERC1	HSPA5	KIF14	KLHL1	LDB1	LHX1	LHX5	NAGLU	RERE	RORA	SEZ6	SKOR2	SLC25A46	SPTBN2	TTC21B	TTLL1	UQCRQ	WHRN
GOBP_CEREBELLAR_PURKINJE_CELL_LAYER_FORMATION	https://www.gsea-msigdb.org/gsea/msigdb/human/geneset/GOBP_CEREBELLAR_PURKINJE_CELL_LAYER_FORMATION	AGTPBP1	ATP7A	CEND1	FAIM2	GBA1	HERC1	LDB1	LHX1	LHX5	RORA	SKOR2	SLC25A46	TTC21B	TTLL1	WHRN
GOBP_CEREBELLAR_PURKINJE_CELL_LAYER_MORPHOGENESIS	https://www.gsea-msigdb.org/gsea/msigdb/human/geneset/GOBP_CEREBELLAR_PURKINJE_CELL_LAYER_MORPHOGENESIS	AGTPBP1	ATP7A	CEND1	COQ8B	DLL1	FAIM2	GBA1	HERC1	KIF14	LDB1	LHX1	LHX5	RORA	SKOR2	SLC25A46	SPTBN2	TTC21B	TTLL1	WHRN
GOBP_CEREBRAL_CORTEX_CELL_MIGRATION	https://www.gsea-msigdb.org/gsea/msigdb/human/geneset/GOBP_CEREBRAL_CORTEX_CELL_MIGRATION	ADGRG1	ARX	BMERB1	CCDC141	CDK5	CDK5R1	CDK5R2	COL3A1	CTNNB1	DAB1	DAB2IP	DISC1	DIXDC1	EFHC1	EGFR	FBXO45	FGF13	FOXG1	FUT10	GLI3	HTR6	LAMB1	LHX6	LRP8	MBOAT7	MDGA1	NDEL1	NKX2-1	NR2E1	P2RY12	PAFAH1B1	PEX13	PEX5	POU3F2	POU3F3	PSEN1	RELN	RHOA	ROBO1	RTN4	SLIT2	SRGAP2	SRGAP2C	SUN1	SUN2	SYNE2	WDR47	ZMIZ1
GOBP_CEREBRAL_CORTEX_DEVELOPMENT	https://www.gsea-msigdb.org/gsea/msigdb/human/geneset/GOBP_CEREBRAL_CORTEX_DEVELOPMENT	ADGRG1	AKIRIN2	ARHGAP11B	ARX	ASCL1	ASPM	ATIC	ATOH1	BAX	BBS1	BBS2	BBS4	BMERB1	BNIP3	BTBD3	CCDC141	CCDC85C	CDH2	CDK5	CDK5R1	CDK5R2	CDON	CEP120	CNTNAP2	COL3A1	CRK	CRKL	CSNK2A2	CTNNB1	DAB1	DAB2IP	DISC1	DIXDC1	DMRTA2	EFHC1	EGFR	EMX1	EMX2	EOMES	FAT4	FBXO45	FGF13	FLNA	FOXG1	FOXP2	FUT10	GART	GLI3
GOBP_CEREBRAL_CORTEX_GABAERGIC_INTERNEURON_DEVELOPMENT	https://www.gsea-msigdb.org/gsea/msigdb/human/geneset/GOBP_CEREBRAL_CORTEX_GABAERGIC_INTERNEURON_DEVELOPMENT	ARX	CNTN2	DRD1	DRD2	FEZF2	LHX6	RAC3
GOBP_CEREBRAL_CORTEX_GABAERGIC_INTERNEURON_DIFFERENTIATION	https://www.gsea-msigdb.org/gsea/msigdb/human/geneset/GOBP_CEREBRAL_CORTEX_GABAERGIC_INTERNEURON_DIFFERENTIATION	ARX	ASCL1	CNTN2	DLX1	DLX2	DRD1	DRD2	FEZF2	LHX6	NKX2-1	RAC3
GOBP_CEREBRAL_CORTEX_NEURON_DIFFERENTIATION	https://www.gsea-msigdb.org/gsea/msigdb/human/geneset/GOBP_CEREBRAL_CORTEX_NEURON_DIFFERENTIATION	ARX	ASCL1	C21orf91	CHD5	CNTN2	DLX1	DLX2	DRD1	DRD2	ELAVL4	EMX1	EOMES	FEZF2	HES1	HPRT1	ID4	LHX6	NKX2-1	NR2E1	OPHN1	PAFAH1B1	PEX5	PSEN1	RAC3	SIN3A	TOX	ZNF335
GOBP_CEREBRAL_CORTEX_RADIALLY_ORIENTED_CELL_MIGRATION	https://www.gsea-msigdb.org/gsea/msigdb/human/geneset/GOBP_CEREBRAL_CORTEX_RADIALLY_ORIENTED_CELL_MIGRATION	ADGRG1	BMERB1	CCDC141	CDK5	CDK5R1	CDK5R2	COL3A1	CTNNB1	DAB1	DAB2IP	DISC1	DIXDC1	FBXO45	FOXG1	FUT10	GLI3	LAMB1	LHX6	LRP8	MBOAT7	MDGA1	NDEL1	NR2E1	P2RY12	PAFAH1B1	POU3F2	POU3F3	RELN	RTN4	SRGAP2	SRGAP2C	SUN1	SUN2	SYNE2	WDR47	ZMIZ1
GOBP_CEREBRAL_CORTEX_REGIONALIZATION	https://www.gsea-msigdb.org/gsea/msigdb/human/geneset/GOBP_CEREBRAL_CORTEX_REGIONALIZATION	ADGRG1	DMRTA2	EMX1	EMX2	EOMES	PAX6	TRA2B
GOBP_CEREBRAL_CORTEX_TANGENTIAL_MIGRATION	https://www.gsea-msigdb.org/gsea/msigdb/human/geneset/GOBP_CEREBRAL_CORTEX_TANGENTIAL_MIGRATION	ARX	FBXO45	LHX6	RELN	ROBO1	SLIT2
GOBP_CEREBROSPINAL_FLUID_CIRCULATION	https://www.gsea-msigdb.org/gsea/msigdb/human/geneset/GOBP_CEREBROSPINAL_FLUID_CIRCULATION	AQP4	CCDC39	CFAP221	CFAP43	CFAP45	CFAP54	DAW1	DNAAF11	DNAH9	JHY	KATNIP	NHERF1	ODAD3	ODAD4	SPAG16
GOBP_CGMP_BIOSYNTHETIC_PROCESS	https://www.gsea-msigdb.org/gsea/msigdb/human/geneset/GOBP_CGMP_BIOSYNTHETIC_PROCESS	GUCY1A1	GUCY1A2	GUCY1B1	GUCY2C	GUCY2D	GUCY2F	NPPA	NPPB	NPPC	NPR1	NPR2
GOBP_CGMP_CATABOLIC_PROCESS	https://www.gsea-msigdb.org/gsea/msigdb/human/geneset/GOBP_CGMP_CATABOLIC_PROCESS	PDE10A	PDE1A	PDE2A	PDE5A	PDE9A
GOBP_CGMP_MEDIATED_SIGNALING	https://www.gsea-msigdb.org/gsea/msigdb/human/geneset/GOBP_CGMP_MEDIATED_SIGNALING	ADNP	ADORA2B	APOE	AQP1	CD36	CGAS	EDNRB	ENSG00000290147	GUCA1A	GUCA2B	GUCY1A1	GUCY1A2	GUCY1B1	GUCY2D	GUCY2F	HTR2B	HTR2C	INS	IRAG1	KCNC2	MTNR1B	NHERF4	NPPA	NPPB	NPPC	NPR1	PDE10A	PDE11A	PDE2A	PDE3A	PRKG1	RUNDC3A	THBS1
GOBP_CGMP_METABOLIC_PROCESS	https://www.gsea-msigdb.org/gsea/msigdb/human/geneset/GOBP_CGMP_METABOLIC_PROCESS	GUCY1A1	GUCY1A2	GUCY1B1	GUCY2C	GUCY2D	GUCY2F	NPPA	NPPB	NPPC	NPR1	NPR2	PDE10A	PDE1A	PDE2A	PDE5A	PDE9A	RORA
GOBP_CHAPERONE_COFACTOR_DEPENDENT_PROTEIN_REFOLDING	https://www.gsea-msigdb.org/gsea/msigdb/human/geneset/GOBP_CHAPERONE_COFACTOR_DEPENDENT_PROTEIN_REFOLDING	BAG1	CD74	DNAJB1	DNAJB12	DNAJB13	DNAJB14	DNAJB4	DNAJB5	DNAJC18	DNAJC7	ERO1A	GAK	HSPA13	HSPA14	HSPA1A	HSPA1B	HSPA1L	HSPA2	HSPA5	HSPA6	HSPA7	HSPA8	HSPA9	HSPE1	HSPH1	PTGES3	SDF2	SDF2L1	ST13	TOR1A	TOR1B	TOR2A
GOBP_CHAPERONE_MEDIATED_AUTOPHAGY	https://www.gsea-msigdb.org/gsea/msigdb/human/geneset/GOBP_CHAPERONE_MEDIATED_AUTOPHAGY	ATG5	ATP13A2	BAG3	CLU	CTSA	EEF1A1	EEF1A2	GFAP	HSP90AA1	HSPA8	LAMP2	PLK3	SNCA	SNRNP70	STUB1
GOBP_CHAPERONE_MEDIATED_PROTEIN_COMPLEX_ASSEMBLY	https://www.gsea-msigdb.org/gsea/msigdb/human/geneset/GOBP_CHAPERONE_MEDIATED_PROTEIN_COMPLEX_ASSEMBLY	APCS	BBS10	BBS12	CCT2	CLU	HOPX	HSP90AA1	HSP90AB1	HSPA1A	HSPA4	HSPD1	LONP1	MKKS	NDUFAF1	PFDN6	PSMG1	PSMG2	PSMG3	PTGES3	PTGES3L	STUB1	THEG	TMEM35A
GOBP_CHAPERONE_MEDIATED_PROTEIN_FOLDING	https://www.gsea-msigdb.org/gsea/msigdb/human/geneset/GOBP_CHAPERONE_MEDIATED_PROTEIN_FOLDING	BAG1	CCT2	CCT3	CCT4	CCT5	CCT6A	CCT7	CCT8	CD74	CHORDC1	CLU	CRTAP	CSNK2A1	DFFA	DNAJB1	DNAJB12	DNAJB13	DNAJB14	DNAJB2	DNAJB3	DNAJB4	DNAJB5	DNAJB6	DNAJB7	DNAJB8	DNAJC18	DNAJC24	DNAJC5	DNAJC7	ERO1A	FKBP11	FKBP2	FKBP4	FKBP5	GAK	HSPA13	HSPA14	HSPA1A	HSPA1B	HSPA1L	HSPA2	HSPA5	HSPA6	HSPA7	HSPA8	HSPA9	HSPB1	HSPB6
GOBP_CHEMICAL_HOMEOSTASIS	https://www.gsea-msigdb.org/gsea/msigdb/human/geneset/GOBP_CHEMICAL_HOMEOSTASIS	ABCA1	ABCA12	ABCA2	ABCA3	ABCA5	ABCB11	ABCB4	ABCB6	ABCB7	ABCC6	ABCC8	ABCD1	ABCG1	ABCG4	ABCG5	ABCG8	ABHD4	ABHD5	ABL1	ACACA	ACE	ACO1	ACOX1	ACOX2	ACOX3	ACOXL	ACSM1	ACSM2A	ACSM3	ADCK1	ADCY5	ADCY6	ADCY8	ADGRF5	ADIPOQ	ADIPOR1	ADIPOR2	ADISSP	ADNP	ADORA1	ADRA2A	AFG3L2	AGER	AGT	AGTR1	AKAP11	AKAP6	AKR1B1
GOBP_CHEMICAL_SYNAPTIC_TRANSMISSION_POSTSYNAPTIC	https://www.gsea-msigdb.org/gsea/msigdb/human/geneset/GOBP_CHEMICAL_SYNAPTIC_TRANSMISSION_POSTSYNAPTIC	ABAT	ADORA1	ADORA2A	ADRB2	AKT1	APP	ARRB2	BAIAP2	CBLN1	CDK5	CELF4	CHRFAM7A	CHRNA1	CHRNA10	CHRNA2	CHRNA3	CHRNA4	CHRNA5	CHRNA6	CHRNA7	CHRNA9	CHRNB1	CHRNB2	CHRNB3	CHRNB4	CHRND	CHRNE	CHRNG	CUX2	DLG4	DMPK	DRD2	DRD4	DVL1	EEA1	EIF4A3	GHRL	GLRA1	GLRA2	GLRA3	GLRB	GRID2	GRIK2	GRIK5	GRIN1	GRIN2A	GRIN2B	GRIN2C
GOBP_CHEMOKINE_C_C_MOTIF_LIGAND_5_PRODUCTION	https://www.gsea-msigdb.org/gsea/msigdb/human/geneset/GOBP_CHEMOKINE_C_C_MOTIF_LIGAND_5_PRODUCTION	ADCYAP1	ARG2	DDX3X	DEFB124	IL10	MAVS	MCOLN2	MUL1	OAS3	SIRPA	TRPV4
GOBP_CHEMOKINE_C_X_C_MOTIF_LIGAND_12_SIGNALING_PATHWAY	https://www.gsea-msigdb.org/gsea/msigdb/human/geneset/GOBP_CHEMOKINE_C_X_C_MOTIF_LIGAND_12_SIGNALING_PATHWAY	CXCL12	CXCR4	ENTREP1	OXSR1	STK39	TREM2	WBP1L
GOBP_CHEMOKINE_C_X_C_MOTIF_LIGAND_1_PRODUCTION	https://www.gsea-msigdb.org/gsea/msigdb/human/geneset/GOBP_CHEMOKINE_C_X_C_MOTIF_LIGAND_1_PRODUCTION	IL17A	IL17F	IL17RA	MYD88	TIRAP	TRPV4
GOBP_CHEMOKINE_C_X_C_MOTIF_LIGAND_2_PRODUCTION	https://www.gsea-msigdb.org/gsea/msigdb/human/geneset/GOBP_CHEMOKINE_C_X_C_MOTIF_LIGAND_2_PRODUCTION	CD74	F2RL1	FOXP1	HMGB1	KLF4	LPL	MAP2K5	MBP	MCOLN2	MIF	MIR146A	MIR766	MYD88	OAS1	OAS3	POSTN	TGFB1	TIRAP	TLR4	TNF
GOBP_CHEMOKINE_PRODUCTION	https://www.gsea-msigdb.org/gsea/msigdb/human/geneset/GOBP_CHEMOKINE_PRODUCTION	ACKR1	ADAM17	ADCYAP1	ADIPOQ	ADORA2B	AGER	AIF1	AIRE	ALOX15B	APOD	APP	ARG2	AZU1	C1QTNF3	C5	CARD9	CD74	CD84	CHIA	CLEC7A	CSF1R	CXCL6	DDX3X	DEFB124	EGR1	EIF2AK2	ELANE	EPHA2	ERBIN	F2RL1	FFAR2	FFAR3	FOXP1	GSTP1	HAVCR2	HIF1A	HMGB1	HMOX1	IFNG	IL10	IL17A	IL17F	IL17RA	IL18	IL1B	IL1RL1	IL33	IL4R
GOBP_CHEMOREPULSION_OF_AXON	https://www.gsea-msigdb.org/gsea/msigdb/human/geneset/GOBP_CHEMOREPULSION_OF_AXON	NTN1	PLXNA4	RYK	SEMA3B	UNC5C	WNT5A
GOBP_CHEMOSENSORY_BEHAVIOR	https://www.gsea-msigdb.org/gsea/msigdb/human/geneset/GOBP_CHEMOSENSORY_BEHAVIOR	ADAM11	ADCY3	ATP6V1B1	BBS1	CASR	CFAP69	CHD7	GJB4	LMX1A	NTRK1	OBP2B	PRKCG	SCN11A	SHANK1	TAS2R5	TPBG	TRPV1	WFS1
GOBP_CHIASMA_ASSEMBLY	https://www.gsea-msigdb.org/gsea/msigdb/human/geneset/GOBP_CHIASMA_ASSEMBLY	BRIP1	CCNB1IP1	MSH5	RNF212	SYCP1	TEX11	UBE2B
GOBP_CHITIN_METABOLIC_PROCESS	https://www.gsea-msigdb.org/gsea/msigdb/human/geneset/GOBP_CHITIN_METABOLIC_PROCESS	CHI3L1	CHI3L2	CHIA	CHIT1	CTBS	OVGP1
GOBP_CHLORIDE_TRANSPORT	https://www.gsea-msigdb.org/gsea/msigdb/human/geneset/GOBP_CHLORIDE_TRANSPORT	ABCB1	ANO1	ANO10	ANO2	ANO3	ANO4	ANO5	ANO6	ANO7	ANO8	ANO9	APOL1	ATP8B1	BEST1	BEST2	BEST3	BEST4	BSND	CA2	CA7	CASR	CFTR	CLCA1	CLCA2	CLCA3P	CLCA4	CLCC1	CLCN1	CLCN2	CLCN3	CLCN4	CLCN5	CLCN6	CLCN7	CLCNKA	CLCNKB	CLDN17	CLDN4	CLIC1	CLIC2	CLIC3	CLIC4	CLIC5	CLIC6	CLNS1A	FXYD1	FXYD3	GABRA1
GOBP_CHOLANGIOCYTE_PROLIFERATION	https://www.gsea-msigdb.org/gsea/msigdb/human/geneset/GOBP_CHOLANGIOCYTE_PROLIFERATION	GPBAR1	HDAC6	LIMS2	NOTCH2	PKHD1
GOBP_CHOLESTEROL_CATABOLIC_PROCESS	https://www.gsea-msigdb.org/gsea/msigdb/human/geneset/GOBP_CHOLESTEROL_CATABOLIC_PROCESS	AKR1D1	APOE	CYP27A1	CYP39A1	CYP46A1	CYP7A1	SCARB1	SCARF1	SNX17
GOBP_CHOLESTEROL_EFFLUX	https://www.gsea-msigdb.org/gsea/msigdb/human/geneset/GOBP_CHOLESTEROL_EFFLUX	ABCA1	ABCA12	ABCA2	ABCA3	ABCA5	ABCA7	ABCA8	ABCG1	ABCG4	ABCG5	ABCG8	ADIPOQ	APOA1	APOA2	APOA4	APOA5	APOB	APOC1	APOC2	APOC3	APOE	APOM	CAV1	CES1	CETP	EEPD1	EGF	GPS2	LAMTOR1	LIPA	LRP1	MIR128-1	MIR130B	MIR144	MIR145	MIR148A	MIR19B1	MIR206	MIR26A1	MIR27A	MIR27B	MIR301B	MIR302A	MIR33A	MIR33B	MIR613	MIR758	MIR9-1
GOBP_CHOLESTEROL_IMPORT	https://www.gsea-msigdb.org/gsea/msigdb/human/geneset/GOBP_CHOLESTEROL_IMPORT	APOA1	APOA2	APOC3	CD36	LAMTOR1	LDLR	SCARB1	STARD4	STARD5
GOBP_CHOLESTEROL_STORAGE	https://www.gsea-msigdb.org/gsea/msigdb/human/geneset/GOBP_CHOLESTEROL_STORAGE	ABCA1	ABCG1	APOB	CD36	CES1	EHD1	LIPA	LPL	MIR144	MIR146A	MSR1	NPC1	NPC2	NR1H2	NR1H3	PPARA	PPARD	PPARG	SCARB1	SOAT1	SOAT2	SREBF2	STARD4	TREM2	TTC39B
GOBP_CHOLINE_METABOLIC_PROCESS	https://www.gsea-msigdb.org/gsea/msigdb/human/geneset/GOBP_CHOLINE_METABOLIC_PROCESS	ALDH7A1	BCHE	CHDH	DMGDH	ENPP6	SLC44A1
GOBP_CHOLINE_TRANSPORT	https://www.gsea-msigdb.org/gsea/msigdb/human/geneset/GOBP_CHOLINE_TRANSPORT	PSEN1	SEC14L1	SLC22A2	SLC44A1	SLC44A2	SLC44A3	SLC44A4	SLC44A5	SLC5A7
GOBP_CHONDROBLAST_DIFFERENTIATION	https://www.gsea-msigdb.org/gsea/msigdb/human/geneset/GOBP_CHONDROBLAST_DIFFERENTIATION	CCN1	FGF2	FGF4	GDF5	RARA
GOBP_CHONDROCYTE_DEVELOPMENT	https://www.gsea-msigdb.org/gsea/msigdb/human/geneset/GOBP_CHONDROCYTE_DEVELOPMENT	AXIN2	BMPR1B	BMPR2	BPNT2	CHST11	CHSY1	COL11A1	COL27A1	COMP	ECM1	EIF2AK3	EXT1	FGF18	HOXA11	MATN1	MEX3C	MSX2	PTHLH	RARG	RFLNA	RFLNB	RUNX2	SERPINH1	SFRP2	SHOX2	SMAD7	SMPD3	SOX9	SULF1	SULF2	TGFBR2	TSKU
GOBP_CHONDROCYTE_DEVELOPMENT_INVOLVED_IN_ENDOCHONDRAL_BONE_MORPHOGENESIS	https://www.gsea-msigdb.org/gsea/msigdb/human/geneset/GOBP_CHONDROCYTE_DEVELOPMENT_INVOLVED_IN_ENDOCHONDRAL_BONE_MORPHOGENESIS	COL27A1	MATN1	RARG	SERPINH1	SMPD3	SOX9	TGFBR2	TSKU
GOBP_CHONDROCYTE_DIFFERENTIATION	https://www.gsea-msigdb.org/gsea/msigdb/human/geneset/GOBP_CHONDROCYTE_DIFFERENTIATION	ACVRL1	ADAMTS12	ADAMTS7	AMELX	ANXA6	ARID5A	ATF2	AXIN2	BMP2	BMP4	BMP6	BMPR1A	BMPR1B	BMPR2	BPNT2	CCN2	CCN3	CCN4	CHADL	CHST11	CHSY1	COL11A1	COL27A1	COL2A1	COL3A1	COMP	CREB3L2	CTNNB1	CYTL1	ECM1	EFEMP1	EIF2AK3	EXT1	EXT2	FGF18	FGF9	FGFR3	FOSL2	GDF5	GDF6	GLG1	GLI3	GPLD1	GREM1	HES5	HIF1A	HMGA2	HOXA11
GOBP_CHONDROCYTE_DIFFERENTIATION_INVOLVED_IN_ENDOCHONDRAL_BONE_MORPHOGENESIS	https://www.gsea-msigdb.org/gsea/msigdb/human/geneset/GOBP_CHONDROCYTE_DIFFERENTIATION_INVOLVED_IN_ENDOCHONDRAL_BONE_MORPHOGENESIS	ANXA6	ATF2	AXIN2	COL27A1	IFT80	IHH	MATN1	NPPC	RARG	SERPINH1	SMPD3	SOX9	TGFBR2	TRIP11	TSKU
GOBP_CHONDROCYTE_HYPERTROPHY	https://www.gsea-msigdb.org/gsea/msigdb/human/geneset/GOBP_CHONDROCYTE_HYPERTROPHY	EXT1	MEX3C	RARG	SMAD7	SOX9	TGFBR2
GOBP_CHONDROCYTE_PROLIFERATION	https://www.gsea-msigdb.org/gsea/msigdb/human/geneset/GOBP_CHONDROCYTE_PROLIFERATION	BMPR1B	BMPR2	CCN2	CCN3	COMP	DDR2	EXT1	FGFR3	FOSL2	HMGA2	IHH	LEF1	LTF	MIR21	MMP14	MMP16	MUSTN1	NPR2	PBXIP1	SIRT6	SIX2	SLC26A2	SMAD7	SOX9	STC1
GOBP_CHONDROITIN_SULFATE_BIOSYNTHETIC_PROCESS	https://www.gsea-msigdb.org/gsea/msigdb/human/geneset/GOBP_CHONDROITIN_SULFATE_BIOSYNTHETIC_PROCESS	B3GALT6	CHPF	CHPF2	CHST11	CHST12	CHST13	CHST15	CHST3	CHST7	CHST9	CHSY1	CHSY3	CSGALNACT1	CSGALNACT2	DSE	SLC35B2	UGDH	XYLT1	XYLT2
GOBP_CHONDROITIN_SULFATE_METABOLIC_PROCESS	https://www.gsea-msigdb.org/gsea/msigdb/human/geneset/GOBP_CHONDROITIN_SULFATE_METABOLIC_PROCESS	B3GALT6	BPNT2	CHPF	CHPF2	CHST11	CHST12	CHST13	CHST15	CHST3	CHST7	CHST9	CHSY1	CHSY3	CSGALNACT1	CSGALNACT2	DSE	DSEL	EXT1	GUSB	HEXB	HYAL1	HYAL4	NDNF	SLC35B2	UGDH	XYLT1	XYLT2
GOBP_CHONDROITIN_SULFATE_PROTEOGLYCAN_BIOSYNTHETIC_PROCESS	https://www.gsea-msigdb.org/gsea/msigdb/human/geneset/GOBP_CHONDROITIN_SULFATE_PROTEOGLYCAN_BIOSYNTHETIC_PROCESS	B3GALT6	B3GAT1	B3GAT2	B3GAT3	CHPF	CHPF2	CHST11	CHST12	CHST13	CHST15	CHST3	CHST7	CHST9	CHSY1	CHSY3	CSGALNACT1	CSGALNACT2	CYTL1	DSE	PXYLP1	SLC35B2	UGDH	XYLT1	XYLT2
GOBP_CHONDROITIN_SULFATE_PROTEOGLYCAN_METABOLIC_PROCESS	https://www.gsea-msigdb.org/gsea/msigdb/human/geneset/GOBP_CHONDROITIN_SULFATE_PROTEOGLYCAN_METABOLIC_PROCESS	B3GALT6	B3GAT1	B3GAT2	B3GAT3	BPNT2	CHPF	CHPF2	CHST11	CHST12	CHST13	CHST15	CHST3	CHST7	CHST9	CHSY1	CHSY3	CSGALNACT1	CSGALNACT2	CYTL1	DSE	DSEL	EXT1	GUSB	HEXB	HYAL1	HYAL4	NDNF	PXYLP1	SLC35B2	UGDH	XYLT1	XYLT2
GOBP_CHORIONIC_TROPHOBLAST_CELL_DIFFERENTIATION	https://www.gsea-msigdb.org/gsea/msigdb/human/geneset/GOBP_CHORIONIC_TROPHOBLAST_CELL_DIFFERENTIATION	ASCL2	DNMT3L	E2F7	E2F8	FZD5	HTRA1	MAP3K4
GOBP_CHORIONIC_TROPHOBLAST_CELL_PROLIFERATION	https://www.gsea-msigdb.org/gsea/msigdb/human/geneset/GOBP_CHORIONIC_TROPHOBLAST_CELL_PROLIFERATION	ACVR1C	BOK	FZD5	INSL4	NODAL
GOBP_CHORION_DEVELOPMENT	https://www.gsea-msigdb.org/gsea/msigdb/human/geneset/GOBP_CHORION_DEVELOPMENT	ASCL2	DNAJB6	DNMT3L	E2F7	E2F8	FZD5	HTRA1	MAP3K4	PAXIP1	TMED2
GOBP_CHORIO_ALLANTOIC_FUSION	https://www.gsea-msigdb.org/gsea/msigdb/human/geneset/GOBP_CHORIO_ALLANTOIC_FUSION	BMP5	BMP7	CCN1	DNAJB6	LEF1	WNT7B	ZFP36L1
GOBP_CHROMATIN_LOOPING	https://www.gsea-msigdb.org/gsea/msigdb/human/geneset/GOBP_CHROMATIN_LOOPING	CTCF	EID3	NSMCE1	NSMCE2	NSMCE3	NSMCE4A	RAD21	SLF1	SLF2	SMC5	SMC6
GOBP_CHROMATIN_REMODELING	https://www.gsea-msigdb.org/gsea/msigdb/human/geneset/GOBP_CHROMATIN_REMODELING	ACTB	ACTL6A	ACTL6B	ACTR5	ACTR6	ACTR8	AICDA	ANP32B	ANTKMT	APLF	APOBEC1	ARID1A	ARID1B	ARID2	ARID4A	ARID4B	ASF1A	ASF1B	ASH1L	ASH2L	ASIP	ATF2	ATF7IP	ATF7IP2	ATPSCKMT	ATRX	AURKA	AXIN1	BABAM1	BAHD1	BAP1	BAZ1A	BAZ1B	BAZ2A	BAZ2B	BCL6	BCL7A	BCL7B	BCL7C	BCOR	BEND3	BICRA	BICRAL	BMI1	BPTF	BRCA1	BRCA2	BRCC3
GOBP_CHROMOSOME_ATTACHMENT_TO_THE_NUCLEAR_ENVELOPE	https://www.gsea-msigdb.org/gsea/msigdb/human/geneset/GOBP_CHROMOSOME_ATTACHMENT_TO_THE_NUCLEAR_ENVELOPE	IFFO1	LMNA	MAJIN	SPDYA	SUN1	TERB1	TERB2
GOBP_CHROMOSOME_CONDENSATION	https://www.gsea-msigdb.org/gsea/msigdb/human/geneset/GOBP_CHROMOSOME_CONDENSATION	ACIN1	AIFM1	AKAP8	AKAP8L	BAZ1B	CDCA5	CDK1	CHMP1A	DFFB	ERN2	GPER1	H1-0	H1-1	H1-10	H1-2	H1-3	H1-4	H1-5	H1-6	H1-7	H1-8	H1-9P	H3-3A	H3-3B	HMGA2	KDM4A	KMT5A	MCPH1	NCAPD2	NCAPD3	NCAPG	NCAPG2	NCAPH	NCAPH2	NUSAP1	PHF13	PLK1	PRM1	PRM2	PRM3	SMARCA5	SMC2	SMC4	SMC5	TENT4A	TOP2A	TTN
GOBP_CHROMOSOME_LOCALIZATION	https://www.gsea-msigdb.org/gsea/msigdb/human/geneset/GOBP_CHROMOSOME_LOCALIZATION	ABRAXAS1	ABRAXAS2	ACTR2	ACTR3	ANKRD53	APC	ATM	AURKB	AURKC	BECN1	BIRC5	BOD1	BUB3	CCNB1	CDC23	CDC42	CDCA5	CDCA8	CDT1	CENPC	CENPE	CENPF	CENPQ	CEP55	CHAMP1	CHMP1A	CHMP1B	CHMP2A	CHMP2B	CHMP3	CHMP4A	CHMP4B	CHMP4BP1	CHMP4C	CHMP5	CHMP6	CHMP7	CUL3	DCTN2	DLGAP5	DSN1	DYNC1H1	ECT2	EML3	EML4	FAM83D	FMN2	GEM
GOBP_CHROMOSOME_MOVEMENT_TOWARDS_SPINDLE_POLE	https://www.gsea-msigdb.org/gsea/msigdb/human/geneset/GOBP_CHROMOSOME_MOVEMENT_TOWARDS_SPINDLE_POLE	ACTR2	ACTR3	CENPE	DLGAP5	FMN2	KATNB1	KPNB1
GOBP_CHROMOSOME_ORGANIZATION	https://www.gsea-msigdb.org/gsea/msigdb/human/geneset/GOBP_CHROMOSOME_ORGANIZATION	AAAS	ABL1	ABRAXAS1	ABRAXAS2	ACD	ACIN1	ACTB	ACTL6A	ACTL6B	ACTR5	ACTR8	AGO4	AIFM1	AKAP8	AKAP8L	ANAPC1	ANAPC11	ANAPC15	ANAPC2	ANAPC4	ANAPC5	ANAPC7	ANKRD31	ANKRD53	ANXA1	APC	APEX1	ARHGEF10	ARID1A	ARID1B	ARID2	ASCC1	ASCC2	ASCC3	ATF7IP	ATF7IP2	ATM	ATR	ATRX	AURKB	AURKC	AXIN2	BAG6	BAZ1B	BCCIP	BCL7A	BCL7B	BCL7C
GOBP_CHROMOSOME_ORGANIZATION_INVOLVED_IN_MEIOTIC_CELL_CYCLE	https://www.gsea-msigdb.org/gsea/msigdb/human/geneset/GOBP_CHROMOSOME_ORGANIZATION_INVOLVED_IN_MEIOTIC_CELL_CYCLE	AGO4	ANKRD31	ATM	ATRX	BAG6	BRIP1	C14orf39	C1orf146	CCNB1IP1	CCNE1	CCNE2	DMC1	EHMT2	FANCD2	HORMAD1	IHO1	KASH5	MAEL	MAJIN	MEI4	MEIOB	MEIOC	MLH1	MLH3	MND1	MRE11	MSH4	MSH5	NCAPD2	NCAPD3	NCAPH	NCAPH2	NDC1	P3H4	PRDM9	PSMC3IP	RAD50	RAD51	REC8	RNF212	RNF212B	SHOC1	SIRT7	SMC2	SMC4	SPATA22	SPDYA	SPO11
GOBP_CHROMOSOME_SEGREGATION	https://www.gsea-msigdb.org/gsea/msigdb/human/geneset/GOBP_CHROMOSOME_SEGREGATION	AAAS	ABRAXAS1	ABRAXAS2	ACTB	ACTL6A	ACTL6B	ACTR2	ACTR3	AGO4	AKAP8	AKAP8L	ANAPC1	ANAPC11	ANAPC15	ANAPC2	ANAPC4	ANAPC5	ANAPC7	ANKRD31	ANKRD53	APC	ARHGEF10	ARID1A	ARID1B	ARID2	ARL8A	ARL8B	ASPM	ATM	AURKA	AURKB	AURKC	BAG6	BAZ1B	BCCIP	BCL7A	BCL7B	BCL7C	BECN1	BEX4	BIRC5	BOD1	BRCA1	BRD7	BRIP1	BUB1	BUB1B	BUB3
GOBP_CHROMOSOME_SEPARATION	https://www.gsea-msigdb.org/gsea/msigdb/human/geneset/GOBP_CHROMOSOME_SEPARATION	ANAPC11	ANAPC15	ANAPC5	ANAPC7	APC	ATM	AURKB	BIRC5	BUB1	BUB1B	BUB3	CCNB1	CDC16	CDC20	CDC23	CDCA8	CDK5RAP2	CENATAC	CENPF	CHFR	CSNK2A1	CSNK2A2	CUL3	DIS3L2	DLGAP5	DUSP1	DYNC1LI1	ESPL1	FBXO5	GEN1	HASPIN	IK	INCENP	KLHL22	KNL1	KNTC1	LCMT1	M1AP	MAD1L1	MAD2L1	MAD2L1BP	MAD2L2	MAPK15	MOS	NCAPD2	NCAPD3	NCAPG	NCAPG2
GOBP_CHRONIC_INFLAMMATORY_RESPONSE	https://www.gsea-msigdb.org/gsea/msigdb/human/geneset/GOBP_CHRONIC_INFLAMMATORY_RESPONSE	ADORA2B	CCL5	CXCL13	CYP19A1	FOXP3	IDO1	IL10	IL4	LTA	NFKBIZ	S100A8	S100A9	SCN11A	THBS1	TNF	TNFAIP3	UNC13D	VCAM1	VNN1
GOBP_CILIARY_BASAL_BODY_ORGANIZATION	https://www.gsea-msigdb.org/gsea/msigdb/human/geneset/GOBP_CILIARY_BASAL_BODY_ORGANIZATION	CCP110	CROCC	DZIP1	FOXJ1	RTTN
GOBP_CILIARY_BODY_MORPHOGENESIS	https://www.gsea-msigdb.org/gsea/msigdb/human/geneset/GOBP_CILIARY_BODY_MORPHOGENESIS	FOXE3	JAG1	NOTCH2	TSKU	VHL
GOBP_CILIARY_NEUROTROPHIC_FACTOR_MEDIATED_SIGNALING_PATHWAY	https://www.gsea-msigdb.org/gsea/msigdb/human/geneset/GOBP_CILIARY_NEUROTROPHIC_FACTOR_MEDIATED_SIGNALING_PATHWAY	CNTF	CNTFR	IL6R	IL6ST	LIFR
GOBP_CILIUM_DISASSEMBLY	https://www.gsea-msigdb.org/gsea/msigdb/human/geneset/GOBP_CILIUM_DISASSEMBLY	AURKA	HDAC6	KIF19	MAP4	NEDD9	RRP7A
GOBP_CILIUM_MOVEMENT	https://www.gsea-msigdb.org/gsea/msigdb/human/geneset/GOBP_CILIUM_MOVEMENT	ADCY10	ADCY3	AKAP4	APOB	AQP4	ARMC12	ARMC2	ASH1L	ATP1A4	ATP2B4	BBS1	BBS2	BBS4	C2CD6	CABS1	CABYR	CAMSAP3	CATSPER1	CATSPER2	CATSPER3	CATSPER4	CATSPERD	CATSPERE	CATSPERZ	CCDC103	CCDC38	CCDC39	CCDC40	CCDC63	CCDC65	CCR6	CELF3	CELSR2	CEP131	CFAP100	CFAP157	CFAP20	CFAP206	CFAP221	CFAP251	CFAP298	CFAP43	CFAP44	CFAP45	CFAP46	CFAP47	CFAP52	CFAP53
GOBP_CILIUM_ORGANIZATION	https://www.gsea-msigdb.org/gsea/msigdb/human/geneset/GOBP_CILIUM_ORGANIZATION	ABCC4	ABLIM1	ABLIM3	ACTR2	ACTR3	ADAMTS16	AHI1	AKAP4	AKT1	ALPK1	ARF4	ARHGAP35	ARL13A	ARL13B	ARL3	ARL6	ARMC12	ARMC2	ARMC9	ASAP1	ATAT1	ATG3	ATG5	ATMIN	ATP6V0D1	ATP6V1D	ATXN10	AURKA	AVIL	B9D1	B9D2	BBIP1	BBOF1	BBS1	BBS10	BBS12	BBS2	BBS4	BBS5	BBS7	BBS9	C2CD3	CATIP	CBY1	CC2D2A	CC2D2B	CCDC103	CCDC113
GOBP_CILIUM_OR_FLAGELLUM_DEPENDENT_CELL_MOTILITY	https://www.gsea-msigdb.org/gsea/msigdb/human/geneset/GOBP_CILIUM_OR_FLAGELLUM_DEPENDENT_CELL_MOTILITY	ADCY3	AKAP4	APOB	ARMC12	ARMC2	ASH1L	ATP1A4	ATP2B4	BBS1	BBS2	BBS4	C2CD6	CABS1	CATSPER1	CATSPER2	CATSPER3	CATSPER4	CATSPERD	CATSPERE	CATSPERZ	CCDC38	CCDC39	CCDC40	CCDC65	CCR6	CELF3	CEP131	CFAP157	CFAP20	CFAP206	CFAP221	CFAP251	CFAP43	CFAP44	CFAP45	CFAP46	CFAP47	CFAP52	CFAP54	CFAP58	CFAP65	CFAP69	CFAP97D1	CHRNA7	CLXN	DDX4	DEFB1	DNAAF11
GOBP_CIRCADIAN_REGULATION_OF_GENE_EXPRESSION	https://www.gsea-msigdb.org/gsea/msigdb/human/geneset/GOBP_CIRCADIAN_REGULATION_OF_GENE_EXPRESSION	AHR	ATF4	BHLHE40	BHLHE41	BMAL1	BMAL2	CARTPT	CAVIN3	CIART	CLOCK	CRY1	CRY2	CSNK1D	CSNK1E	DRD2	DRD3	EGR1	GFPT1	HDAC1	HDAC2	HDAC3	HNRNPU	HUWE1	ID1	ID2	ID3	ID4	KDM2A	KDM5A	KDM8	KMT2A	LGR4	MAGED1	MC3R	MTA1	MYBBP1A	MYCBP2	NAMPT	NCOA2	NGFR	NOCT	NPAS2	NR0B2	NR1D1	NRIP1	NUDT12	OGT	PASD1
GOBP_CIRCADIAN_RHYTHM	https://www.gsea-msigdb.org/gsea/msigdb/human/geneset/GOBP_CIRCADIAN_RHYTHM	AANAT	ADCY1	ADIPOQ	ADORA1	ADORA2A	ADRB1	AGRP	AHR	ASS1	ATF4	ATF5	ATG7	ATOH7	BHLHE40	BHLHE41	BMAL1	BMAL2	BTBD9	BTRC	C3orf70	CARTPT	CAVIN3	CCAR2	CDK1	CHRNB2	CIART	CIPC	CLDN4	CLOCK	CREB1	CRH	CRTC1	CRY1	CRY2	CSF2	CSNK1D	CSNK1E	DDB1	DRD2	DRD3	DRD4	DYRK1A	EGR1	EGR3	EP300	EZH2	F7	FBXL17
GOBP_CIRCADIAN_SLEEP_WAKE_CYCLE	https://www.gsea-msigdb.org/gsea/msigdb/human/geneset/GOBP_CIRCADIAN_SLEEP_WAKE_CYCLE	ADORA1	ADORA2A	ADRB1	BTBD9	CHRNB2	CRH	CSF2	DRD2	FXR1	GHRH	GHRL	HCRTR2	KCNA2	MTNR1B	NLGN1	NPS	NR1D1	PARP1	PER3	PTGDS	TH
GOBP_CIRCADIAN_SLEEP_WAKE_CYCLE_NON_REM_SLEEP	https://www.gsea-msigdb.org/gsea/msigdb/human/geneset/GOBP_CIRCADIAN_SLEEP_WAKE_CYCLE_NON_REM_SLEEP	ADORA1	BTBD9	GHRL	KCNA2	MTNR1B	PARP1
GOBP_CIRCADIAN_SLEEP_WAKE_CYCLE_SLEEP	https://www.gsea-msigdb.org/gsea/msigdb/human/geneset/GOBP_CIRCADIAN_SLEEP_WAKE_CYCLE_SLEEP	ADORA1	ADORA2A	ADRB1	BTBD9	CHRNB2	CRH	CSF2	DRD2	FXR1	GHRH	GHRL	KCNA2	MTNR1B	PARP1	PER3	PTGDS
GOBP_CIRCULATORY_SYSTEM_DEVELOPMENT	https://www.gsea-msigdb.org/gsea/msigdb/human/geneset/GOBP_CIRCULATORY_SYSTEM_DEVELOPMENT	AAMP	ABCC8	ABCC9	ABL1	ACACB	ACADM	ACE	ACKR3	ACTA2	ACTC1	ACTG1	ACTN2	ACVR1	ACVR2B	ACVRL1	ADAM10	ADAM12	ADAM15	ADAM8	ADAMTS1	ADAMTS5	ADAMTS6	ADAMTS9	ADAP2	ADGRA2	ADGRB1	ADGRB2	ADGRB3	ADGRF5	ADGRG1	ADGRG6	ADIPOR2	ADM	ADM2	ADPRHL1	ADRA1A	ADRA2B	ADTRP	AGGF1	AGO1	AGO2	AGTR1	AHI1	AHR	AIMP1	AKAP13	AKAP6	AKT1
GOBP_CIRCULATORY_SYSTEM_PROCESS	https://www.gsea-msigdb.org/gsea/msigdb/human/geneset/GOBP_CIRCULATORY_SYSTEM_PROCESS	ABAT	ABCA2	ABCB1	ABCC1	ABCC2	ABCC3	ABCC4	ABCC5	ABCC8	ABCC9	ABCG2	ABL1	ACE	ACE2	ACSM3	ACTA2	ACTC1	ACVRL1	ADA	ADAMTS16	ADCY10	ADCY6	ADD3	ADH5	ADIPOQ	ADM	ADM2	ADM5	ADORA1	ADORA2A	ADORA2B	ADORA3	ADRA1A	ADRA1B	ADRA1D	ADRA2A	ADRA2B	ADRA2C	ADRB1	ADRB2	ADRB3	AGER	AGT	AGTR1	AGTR2	AGTRAP	AKAP12	AKAP13
GOBP_CITRATE_METABOLIC_PROCESS	https://www.gsea-msigdb.org/gsea/msigdb/human/geneset/GOBP_CITRATE_METABOLIC_PROCESS	ACLY	ACO1	ACO2	CS	IREB2
GOBP_CITRATE_TRANSPORT	https://www.gsea-msigdb.org/gsea/msigdb/human/geneset/GOBP_CITRATE_TRANSPORT	SFXN5	SLC13A3	SLC13A5	SLC25A1	UMOD
GOBP_CITRULLINE_BIOSYNTHETIC_PROCESS	https://www.gsea-msigdb.org/gsea/msigdb/human/geneset/GOBP_CITRULLINE_BIOSYNTHETIC_PROCESS	ALDH18A1	ATP2B4	CAD	CPS1	OTC
GOBP_CITRULLINE_METABOLIC_PROCESS	https://www.gsea-msigdb.org/gsea/msigdb/human/geneset/GOBP_CITRULLINE_METABOLIC_PROCESS	ALDH18A1	ASS1	ATP2B4	CAD	CPS1	DDAH1	DDAH2	OTC
GOBP_CLATHRIN_COATED_VESICLE_CARGO_LOADING	https://www.gsea-msigdb.org/gsea/msigdb/human/geneset/GOBP_CLATHRIN_COATED_VESICLE_CARGO_LOADING	AP3B1	AP3B2	AP3D1	AP3M1	AP3M2	AP3S1	AP3S2
GOBP_CLATHRIN_COAT_ASSEMBLY	https://www.gsea-msigdb.org/gsea/msigdb/human/geneset/GOBP_CLATHRIN_COAT_ASSEMBLY	AP2S1	CALY	CLINT1	CLTA	CLTC	DAB2	EPS15	FCHO1	FCHO2	GAK	HIP1	HIP1R	NSG1	NSG2	PICALM	PIK3C2A	SNAP91
GOBP_CLATHRIN_DEPENDENT_ENDOCYTOSIS	https://www.gsea-msigdb.org/gsea/msigdb/human/geneset/GOBP_CLATHRIN_DEPENDENT_ENDOCYTOSIS	AAK1	AP2A1	AP2A2	AP2B1	AP2M1	AP2S1	BMP2K	CANX	CCDC32	CLTA	CLTB	CLTC	DAB2	DGKD	DLL1	DNAJC6	FCHO1	FCHO2	FCHSD2	FNBP1L	GAK	GPR107	HIP1R	INPP5F	ITGA4	ITSN1	ITSN2	LMBRD1	MAGI2	NEU3	PICALM	PIK3CB	PIP5K1C	PROM2	SCYL2	SGIP1	SH3GL3	SIGLEC1	SLC9B2	SMAP1	SNAP91	STON1	STON2	TNK2	UBQLN2	UNC119	USH1G	WASL
GOBP_CLEARANCE_OF_FOREIGN_INTRACELLULAR_NUCLEIC_ACIDS	https://www.gsea-msigdb.org/gsea/msigdb/human/geneset/GOBP_CLEARANCE_OF_FOREIGN_INTRACELLULAR_NUCLEIC_ACIDS	APOBEC3A	APOBEC3B	APOBEC3C	APOBEC3D	APOBEC3F	APOBEC3H
GOBP_CLEAVAGE_FURROW_FORMATION	https://www.gsea-msigdb.org/gsea/msigdb/human/geneset/GOBP_CLEAVAGE_FURROW_FORMATION	AURKB	RHOA	SNX18	SNX33	SNX9	SPIRE1	SPIRE2
GOBP_CLUSTERING_OF_VOLTAGE_GATED_SODIUM_CHANNELS	https://www.gsea-msigdb.org/gsea/msigdb/human/geneset/GOBP_CLUSTERING_OF_VOLTAGE_GATED_SODIUM_CHANNELS	AGRN	GLDN	MYOC	NRCAM	SCLT1	SPTBN4
GOBP_CMP_METABOLIC_PROCESS	https://www.gsea-msigdb.org/gsea/msigdb/human/geneset/GOBP_CMP_METABOLIC_PROCESS	DCK	DPYD	DPYS	UCK1	UCK2	UCKL1	UPB1	UPP1
GOBP_COBALAMIN_METABOLIC_PROCESS	https://www.gsea-msigdb.org/gsea/msigdb/human/geneset/GOBP_COBALAMIN_METABOLIC_PROCESS	ABCD4	AMN	CLYBL	CUBN	MMAA	MMAB	MMACHC	MMADHC	MTR
GOBP_COBALAMIN_TRANSPORT	https://www.gsea-msigdb.org/gsea/msigdb/human/geneset/GOBP_COBALAMIN_TRANSPORT	ABCC1	ABCD4	AMN	CBLIF	CD320	CUBN	LRP2	TCN1	TCN2
GOBP_COBALT_ION_TRANSPORT	https://www.gsea-msigdb.org/gsea/msigdb/human/geneset/GOBP_COBALT_ION_TRANSPORT	CBLIF	MMGT1	SLC11A2	SLC30A5	SLC39A8	SLC41A2	TCN1	TCN2
GOBP_COCHLEA_DEVELOPMENT	https://www.gsea-msigdb.org/gsea/msigdb/human/geneset/GOBP_COCHLEA_DEVELOPMENT	ADAM10	CALB1	CCNA2	CECR2	CTHRC1	DCANP1	DCHS1	DVL1	DVL2	EPHA4	EYA1	FRZB	FZD2	GABRA5	GABRB2	GATA2	GRHL3	HES1	HEY2	HOXA1	HPN	IFT20	IFT27	KCNK2	KCNK3	KCNQ1	MCM2	MYO3A	MYO3B	NEUROG1	PAFAH1B1	PAX2	POU3F4	PTK7	RPGRIP1L	SIX1	SLC17A8	SLC26A5	SLITRK6	SOBP	SOX9	TBX1	TBX18	TBX2	TIFAB	WNT5A	ZEB1
GOBP_COCHLEA_MORPHOGENESIS	https://www.gsea-msigdb.org/gsea/msigdb/human/geneset/GOBP_COCHLEA_MORPHOGENESIS	CTHRC1	DCANP1	DVL1	DVL2	EYA1	FRZB	FZD2	GRHL3	HOXA1	HPN	MYO3A	MYO3B	NEUROG1	PAX2	POU3F4	PTK7	SIX1	SOX9	TBX1	TBX18	TBX2	TIFAB	WNT5A	ZEB1
GOBP_COENZYME_A_BIOSYNTHETIC_PROCESS	https://www.gsea-msigdb.org/gsea/msigdb/human/geneset/GOBP_COENZYME_A_BIOSYNTHETIC_PROCESS	ACAT1	ACOT7	COASY	DCAKD	PANK1	PANK2	PANK3	PANK4	PPCDC	PPCS	SLC25A16
GOBP_COENZYME_A_METABOLIC_PROCESS	https://www.gsea-msigdb.org/gsea/msigdb/human/geneset/GOBP_COENZYME_A_METABOLIC_PROCESS	ACAT1	ACLY	ACOT7	COASY	CROT	DCAKD	HMGCR	MCCC2	NUDT19	NUDT7	NUDT8	PANK1	PANK2	PANK3	PANK4	PPCDC	PPCS	SLC25A16	VNN1
GOBP_COGNITION	https://www.gsea-msigdb.org/gsea/msigdb/human/geneset/GOBP_COGNITION	AAAS	ABCA7	ABCC8	ABL1	ADAM2	ADCY1	ADCY3	ADCY8	ADGRB3	ADGRF1	ADNP	ADORA1	AFF2	AGER	AMFR	APOE	APP	ARC	ARF4	ARL6IP5	ARMCX5-GPRASP2	ASIC1	ATAD1	ATP1A2	ATP8A1	ATXN1	ATXN1L	B2M	B3GAT1	B4GALT2	BBS4	BCHE	BDNF	BGLAP	BRAF	BRINP1	BRSK1	BTBD9	BTG2	C12orf57	C1QL1	C5AR1	CALB1	CAMK2N1	CAMK4	CASP3	CBR3	CCL11
GOBP_COLLAGEN_ACTIVATED_SIGNALING_PATHWAY	https://www.gsea-msigdb.org/gsea/msigdb/human/geneset/GOBP_COLLAGEN_ACTIVATED_SIGNALING_PATHWAY	COL1A1	COL4A1	COL4A2	COL4A3	COL4A5	COL4A6	DDR1	DDR2	GP6	ITGA11	ITGA2	JAK2	OSCAR	SYK	UBASH3B
GOBP_COLLAGEN_ACTIVATED_TYROSINE_KINASE_RECEPTOR_SIGNALING_PATHWAY	https://www.gsea-msigdb.org/gsea/msigdb/human/geneset/GOBP_COLLAGEN_ACTIVATED_TYROSINE_KINASE_RECEPTOR_SIGNALING_PATHWAY	COL1A1	COL4A1	COL4A2	COL4A3	COL4A5	COL4A6	DDR1	DDR2	SYK	UBASH3B
GOBP_COLLAGEN_BIOSYNTHETIC_PROCESS	https://www.gsea-msigdb.org/gsea/msigdb/human/geneset/GOBP_COLLAGEN_BIOSYNTHETIC_PROCESS	ADAMTS3	AMELX	BMP4	CBX8	CIITA	COL1A1	COL5A1	CREB3L1	CYGB	CYP7A1	DDR2	EMILIN1	ENG	F2	F2R	FOSL2	HDAC2	IHH	IL6	INHBA	ITGA2	LARP6	MIR145	MIR149	MIR218-1	MIR29A	MIR29B1	MIR92A1	MYB	NOTCH1	NPPC	P3H3	P3H4	PCOLCE	RCN3	RGCC	RUNX1	SCX	SERPINB7	SERPINF2	SERPINH1	SUCO	TGFB1	TGFB3	TRAM2	UCN	VIM	WNT4
GOBP_COLLAGEN_CATABOLIC_PROCESS	https://www.gsea-msigdb.org/gsea/msigdb/human/geneset/GOBP_COLLAGEN_CATABOLIC_PROCESS	ADAM15	ADAMTS14	ADAMTS2	ADAMTS3	CST3	CTSB	CTSK	CTSL	CTSS	FAP	FURIN	ITGB1	KLK6	MMP1	MMP10	MMP11	MMP12	MMP13	MMP14	MMP15	MMP16	MMP17	MMP19	MMP2	MMP20	MMP21	MMP23B	MMP24	MMP25	MMP26	MMP27	MMP28	MMP3	MMP7	MMP8	MMP9	MRC2	PEPD	PRSS2	PRTN3	RETREG1	RETREG2	RETREG3	TMPRSS6	VSIR
GOBP_COLLAGEN_FIBRIL_ORGANIZATION	https://www.gsea-msigdb.org/gsea/msigdb/human/geneset/GOBP_COLLAGEN_FIBRIL_ORGANIZATION	ADAMTS12	ADAMTS14	ADAMTS2	ADAMTS3	ADAMTS7	AEBP1	ANXA2	ATP7A	BMP1	CHADL	COL11A1	COL11A2	COL12A1	COL14A1	COL18A1	COL1A1	COL1A2	COL27A1	COL28A1	COL2A1	COL3A1	COL5A1	COL5A2	COL5A3	COLGALT1	COLGALT2	COMP	CRTAP	CYP1B1	DDR2	DPT	EFEMP2	EMILIN1	EXT1	FKBP10	FMOD	FOXC1	FOXC2	GREM1	LOX	LOXL1	LOXL2	LOXL3	LOXL4	LUM	MIR29B1	MMP11	NF1
GOBP_COLLAGEN_METABOLIC_PROCESS	https://www.gsea-msigdb.org/gsea/msigdb/human/geneset/GOBP_COLLAGEN_METABOLIC_PROCESS	ADAM15	ADAMTS14	ADAMTS2	ADAMTS3	AMELX	BMP4	CBX8	CIITA	COL1A1	COL1A2	COL5A1	CREB3L1	CST3	CTSB	CTSK	CTSL	CTSS	CYGB	CYP7A1	DDR2	EMILIN1	ENG	F2	F2R	FAP	FOSL2	FURIN	HDAC2	HIF1A	IHH	IL6	INHBA	ITGA2	ITGB1	KLK6	LARP6	MFAP4	MIR145	MIR149	MIR21	MIR218-1	MIR29A	MIR29B1	MIR92A1	MMP1	MMP10	MMP11	MMP12
GOBP_COLLATERAL_SPROUTING	https://www.gsea-msigdb.org/gsea/msigdb/human/geneset/GOBP_COLLATERAL_SPROUTING	APP	BDNF	COBL	CRABP2	DCC	DVL1	EFNA5	EPHA7	FGF13	FSTL4	HDAC6	IFRD1	IST1	LPAR3	NGF	NIN	NPR2	PRKG1	PTPRS	RGMA	RND2	SEMA4D	SPART	SPP1	ULK1	ULK2	WNT3	WNT3A
GOBP_COLLATERAL_SPROUTING_IN_ABSENCE_OF_INJURY	https://www.gsea-msigdb.org/gsea/msigdb/human/geneset/GOBP_COLLATERAL_SPROUTING_IN_ABSENCE_OF_INJURY	APP	COBL	SPART	WNT3	WNT3A
GOBP_COLLECTING_DUCT_DEVELOPMENT	https://www.gsea-msigdb.org/gsea/msigdb/human/geneset/GOBP_COLLECTING_DUCT_DEVELOPMENT	AKR1B1	AQP2	CALB1	DACT2	DLG5	NOTCH1	PAX2	PAX8	PKD1	PTCH1	SHH	TFAP2B	UMOD	WNT7B	WNT9B
GOBP_COLUMNAR_CUBOIDAL_EPITHELIAL_CELL_DEVELOPMENT	https://www.gsea-msigdb.org/gsea/msigdb/human/geneset/GOBP_COLUMNAR_CUBOIDAL_EPITHELIAL_CELL_DEVELOPMENT	AKT1	BAD	BHLHA15	BMAL1	BMP4	BMP5	BMP6	C1GALT1	CDH2	CDK6	CDKN1A	CLOCK	DLL1	FASN	FZD5	GATA2	GDF11	GPAT4	GSK3A	GSK3B	HIF1A	HOXA5	IL6ST	INSM1	KLF5	MIR29B1	MIR541	NKX2-2	NKX3-2	NKX6-1	PAX6	PDPK1	PGR	PRDM1	RARA	RARB	RARG	RFX3	RHEB	ROS1	SIDT2	SLC9A4	SMO	SPDEF	SRC	TIGAR	TLR9	TMIGD1
GOBP_COLUMNAR_CUBOIDAL_EPITHELIAL_CELL_DIFFERENTIATION	https://www.gsea-msigdb.org/gsea/msigdb/human/geneset/GOBP_COLUMNAR_CUBOIDAL_EPITHELIAL_CELL_DIFFERENTIATION	ABL1	AGR2	AKT1	ASCL1	B9D1	BAD	BCCIP	BHLHA15	BMAL1	BMP2	BMP4	BMP5	BMP6	BMP7	C1GALT1	CAV1	CBFA2T2	CDH2	CDK6	CDKN1A	CDX2	CEBPB	CLCN2	CLOCK	CTNNB1	DLG5	DLL1	DLX3	DSPP	EMX1	ENAM	EXT1	FAM20C	FASN	FGF2	FGF8	FGFR2	FOXA1	FST	FZD5	GATA2	GATA4	GATA5	GATA6	GDF11	GPAT4	GSK3A	GSK3B
GOBP_COLUMNAR_CUBOIDAL_EPITHELIAL_CELL_MATURATION	https://www.gsea-msigdb.org/gsea/msigdb/human/geneset/GOBP_COLUMNAR_CUBOIDAL_EPITHELIAL_CELL_MATURATION	BHLHA15	CDKN1A	FZD5	GATA2	GDF11	GPAT4	HIF1A	HOXA5	NKX6-1	PGR	RFX3	TMIGD1	TYMS
GOBP_COMMA_SHAPED_BODY_MORPHOGENESIS	https://www.gsea-msigdb.org/gsea/msigdb/human/geneset/GOBP_COMMA_SHAPED_BODY_MORPHOGENESIS	BMP4	HES1	HES5	LHX1	PAX8
GOBP_COMMISSURAL_NEURON_AXON_GUIDANCE	https://www.gsea-msigdb.org/gsea/msigdb/human/geneset/GOBP_COMMISSURAL_NEURON_AXON_GUIDANCE	ADAM17	DAG1	EPHB2	FZD3	GDNF	NCAM1	NFIB	NRP1	PTCH1	RYK	SMO	VEGFA
GOBP_COMMON_BILE_DUCT_DEVELOPMENT	https://www.gsea-msigdb.org/gsea/msigdb/human/geneset/GOBP_COMMON_BILE_DUCT_DEVELOPMENT	HES1	MKS1	NOTCH2	SOX17	SOX9
GOBP_COMMON_MYELOID_PROGENITOR_CELL_PROLIFERATION	https://www.gsea-msigdb.org/gsea/msigdb/human/geneset/GOBP_COMMON_MYELOID_PROGENITOR_CELL_PROLIFERATION	BAP1	CEACAM1	FBXO4	FLT3	GSTP1	ITPKB	LIPA	NR4A3	UNCX
GOBP_COMPARTMENT_PATTERN_SPECIFICATION	https://www.gsea-msigdb.org/gsea/msigdb/human/geneset/GOBP_COMPARTMENT_PATTERN_SPECIFICATION	DLL1	DLL3	LFNG	NOTCH1	PBX3
GOBP_COMPLEMENT_ACTIVATION	https://www.gsea-msigdb.org/gsea/msigdb/human/geneset/GOBP_COMPLEMENT_ACTIVATION	A2M	C1QA	C1QB	C1QBP	C1QC	C1R	C1RL	C1S	C2	C3	C4A	C4B	C4BPA	C4BPB	C5	C6	C7	C8A	C8B	C8G	C9	CD46	CD55	CD59	CD5L	CFB	CFD	CFH	CFHR1	CFHR2	CFHR3	CFHR4	CFHR5	CFI	CFP	CLU	COLEC10	COLEC11	CR1	CR1L	CR2	FCN1	FCN2	FCN3	IGHA1	IGHA2	IGHE	IGHG1
GOBP_COMPLEMENT_ACTIVATION_ALTERNATIVE_PATHWAY	https://www.gsea-msigdb.org/gsea/msigdb/human/geneset/GOBP_COMPLEMENT_ACTIVATION_ALTERNATIVE_PATHWAY	C3	C5	C7	C8A	C8B	C8G	C9	CFB	CFD	CFH	CFHR5	CFP	CR1	CR2	MIR520B	MIR520E	SUSD4	VSIG4
GOBP_COMPLEMENT_ACTIVATION_CLASSICAL_PATHWAY	https://www.gsea-msigdb.org/gsea/msigdb/human/geneset/GOBP_COMPLEMENT_ACTIVATION_CLASSICAL_PATHWAY	C1QA	C1QB	C1QBP	C1QC	C1R	C1RL	C1S	C2	C3	C4A	C4B	C4BPA	C4BPB	C5	C6	C7	C8A	C8B	C8G	C9	CD46	CD55	CFI	CLU	CR1	CR1L	CR2	IGHA1	IGHA2	IGHE	IGHG1	IGHG2	IGHG3	IGHG4	IGHM	MASP2	MBL2	NCR3LG1	SERPING1	SUSD4	SVEP1	TREM2
GOBP_COMPLEMENT_ACTIVATION_LECTIN_PATHWAY	https://www.gsea-msigdb.org/gsea/msigdb/human/geneset/GOBP_COMPLEMENT_ACTIVATION_LECTIN_PATHWAY	A2M	COLEC10	COLEC11	FCN1	FCN2	FCN3	KRT1	MASP1	MASP2	MBL2	SERPING1
GOBP_COMPLEMENT_DEPENDENT_CYTOTOXICITY	https://www.gsea-msigdb.org/gsea/msigdb/human/geneset/GOBP_COMPLEMENT_DEPENDENT_CYTOTOXICITY	C3	CD55	CD59	CD5L	CFH	CR1	CR1L	IGHG1	IL10	IL11	IL13	IL4	RAB27A	TGFB2
GOBP_COMPLEMENT_RECEPTOR_MEDIATED_SIGNALING_PATHWAY	https://www.gsea-msigdb.org/gsea/msigdb/human/geneset/GOBP_COMPLEMENT_RECEPTOR_MEDIATED_SIGNALING_PATHWAY	C3AR1	C5AR1	C5AR2	CMKLR1	CR1	CR2	FPR1	FPR2	FPR3	GPLD1	GPR32	GPR32P1	GPR33
GOBP_CONNECTIVE_TISSUE_DEVELOPMENT	https://www.gsea-msigdb.org/gsea/msigdb/human/geneset/GOBP_CONNECTIVE_TISSUE_DEVELOPMENT	ABHD15	ACAT1	ACTA2	ACVRL1	ADAMTS12	ADAMTS7	AMELX	AMER1	ANXA6	ARID5A	ARID5B	ARRDC3	ATF2	ATP7A	AXIN2	BARX2	BBS1	BBS2	BBS4	BGN	BMP1	BMP10	BMP2	BMP3	BMP4	BMP5	BMP6	BMP7	BMP8A	BMP8B	BMPR1A	BMPR1B	BMPR2	BPNT2	CASR	CBS	CCN1	CCN2	CCN3	CCN4	CD34	CD44	CER1	CFLAR	CHADL	CHI3L1	CHRDL2	CHST11
GOBP_CONNECTIVE_TISSUE_REPLACEMENT	https://www.gsea-msigdb.org/gsea/msigdb/human/geneset/GOBP_CONNECTIVE_TISSUE_REPLACEMENT	F2R	HIF1A	IL1A	MIR15B	MIR16-1	MIR17	MIR195	MIR199A1	MIR199B	MIR214	MIR34A	MIR34B	MIR34C	PPARG	PPP3CA	ROCK1	ROCK2	RUNX1	TGFB1	TIMP1	UMOD
GOBP_CONNECTIVE_TISSUE_REPLACEMENT_INVOLVED_IN_INFLAMMATORY_RESPONSE_WOUND_HEALING	https://www.gsea-msigdb.org/gsea/msigdb/human/geneset/GOBP_CONNECTIVE_TISSUE_REPLACEMENT_INVOLVED_IN_INFLAMMATORY_RESPONSE_WOUND_HEALING	F2R	HIF1A	IL1A	MIR17	PPARG	TGFB1	TIMP1
GOBP_CONSTITUTIVE_HETEROCHROMATIN_FORMATION	https://www.gsea-msigdb.org/gsea/msigdb/human/geneset/GOBP_CONSTITUTIVE_HETEROCHROMATIN_FORMATION	ATRX	CENPV	EZH1	EZH2	H3-3A	H3-3B	HAT1	HELLS	RIF1	SIRT2	SIRT6	SMCHD1	TSIX
GOBP_CONSTITUTIVE_SECRETORY_PATHWAY	https://www.gsea-msigdb.org/gsea/msigdb/human/geneset/GOBP_CONSTITUTIVE_SECRETORY_PATHWAY	RAB11B	RAB27A	RAB33B	RAB3A	TMEM167A	TMEM167B	TRAPPC11
GOBP_CONVERGENT_EXTENSION	https://www.gsea-msigdb.org/gsea/msigdb/human/geneset/GOBP_CONVERGENT_EXTENSION	DVL1	DVL2	FRZB	LBX2	MESP1	MKKS	NKD1	NPHP3	PTK7	SFRP1	SFRP2	TRIM28	WNT11	WNT5A	WNT5B
GOBP_CONVERGENT_EXTENSION_INVOLVED_IN_AXIS_ELONGATION	https://www.gsea-msigdb.org/gsea/msigdb/human/geneset/GOBP_CONVERGENT_EXTENSION_INVOLVED_IN_AXIS_ELONGATION	NKD1	SFRP1	SFRP2	TRIM28	WNT11	WNT5A
GOBP_CONVERGENT_EXTENSION_INVOLVED_IN_GASTRULATION	https://www.gsea-msigdb.org/gsea/msigdb/human/geneset/GOBP_CONVERGENT_EXTENSION_INVOLVED_IN_GASTRULATION	DVL1	DVL2	LBX2	MKKS	NPHP3	SFRP1	WNT11	WNT5A	WNT5B
GOBP_CONVERGENT_EXTENSION_INVOLVED_IN_ORGANOGENESIS	https://www.gsea-msigdb.org/gsea/msigdb/human/geneset/GOBP_CONVERGENT_EXTENSION_INVOLVED_IN_ORGANOGENESIS	DVL1	DVL2	FRZB	MESP1	WNT5A
GOBP_COP9_SIGNALOSOME_ASSEMBLY	https://www.gsea-msigdb.org/gsea/msigdb/human/geneset/GOBP_COP9_SIGNALOSOME_ASSEMBLY	COPS7A	COPS7B	COPS8	TESPA1	WNT3A
GOBP_COPII_COATED_VESICLE_BUDDING	https://www.gsea-msigdb.org/gsea/msigdb/human/geneset/GOBP_COPII_COATED_VESICLE_BUDDING	CIDEB	CRYZL2P-SEC16B	CSNK1D	CUL3	INSIG1	KLHL12	MAPK15	MIA3	PDCD6	PEF1	PPP6C	PREB	RAB1A	SAR1A	SAR1B	SCAP	SEC13	SEC16A	SEC16B	SEC23A	SEC23B	SEC24A	SEC24B	SEC24C	SEC24D	SEC31A	SEC31B	TBC1D20	TFG	TMED10	TMED2	TRAPPC1	TRAPPC11	TRAPPC12	TRAPPC2	TRAPPC2B	TRAPPC2L	TRAPPC3	TRAPPC4	TRAPPC5	TRAPPC6A	TRAPPC8	VAPA	VAPB
GOBP_COPII_COATED_VESICLE_CARGO_LOADING	https://www.gsea-msigdb.org/gsea/msigdb/human/geneset/GOBP_COPII_COATED_VESICLE_CARGO_LOADING	CIDEB	INSIG1	MIA3	RAB1A	SAR1A	SCAP	SEC13	SEC23A	SEC23B	SEC24A	SEC24B	SEC24C	SEC24D	SEC31A	SEC31B	TBC1D20
GOBP_COPI_COATED_VESICLE_BUDDING	https://www.gsea-msigdb.org/gsea/msigdb/human/geneset/GOBP_COPI_COATED_VESICLE_BUDDING	ARFGAP2	ARFGAP3	GBF1	TMED10	TMED2	TMED9
GOBP_COPPER_ION_HOMEOSTASIS	https://www.gsea-msigdb.org/gsea/msigdb/human/geneset/GOBP_COPPER_ION_HOMEOSTASIS	ABCB6	ANKRD9	APP	ARF1	ATOX1	ATP7A	ATP7B	CCDC22	COMMD1	COX19	CUTC	MT2A	PRND	PRNP	SCO1	SCO2	SLC30A10	SLC31A1	SLC31A2	XIAP
GOBP_COPPER_ION_IMPORT	https://www.gsea-msigdb.org/gsea/msigdb/human/geneset/GOBP_COPPER_ION_IMPORT	ATP7A	ATP7B	SLC31A1	SLC31A2	STEAP2	STEAP3	STEAP4
GOBP_COPPER_ION_TRANSMEMBRANE_TRANSPORT	https://www.gsea-msigdb.org/gsea/msigdb/human/geneset/GOBP_COPPER_ION_TRANSMEMBRANE_TRANSPORT	ATP7A	ATP7B	SLC11A2	SLC31A1	SLC31A2	SLC39A11	SLC46A3	STEAP2
GOBP_COPPER_ION_TRANSPORT	https://www.gsea-msigdb.org/gsea/msigdb/human/geneset/GOBP_COPPER_ION_TRANSPORT	ATOX1	ATP7A	ATP7B	COX17	CP	CUTC	FKBP4	HEPH	HEPHL1	MMGT1	SLC11A2	SLC31A1	SLC31A2	SLC39A11	SLC46A3	STEAP2	STEAP3	STEAP4
GOBP_COPULATION	https://www.gsea-msigdb.org/gsea/msigdb/human/geneset/GOBP_COPULATION	ABAT	ACVR2A	ADA	AVPR1A	CNR1	DDO	EDDM3A	EDNRB	KLK14	OXTR	P2RX1	P2RY1	PI3	SEMG1	SERPINE2	SLC6A4	TAC1	TACR1	VIP
GOBP_CORNEA_DEVELOPMENT_IN_CAMERA_TYPE_EYE	https://www.gsea-msigdb.org/gsea/msigdb/human/geneset/GOBP_CORNEA_DEVELOPMENT_IN_CAMERA_TYPE_EYE	ANGPTL7	FOXE3	KERA	KRT12	LIMK2	PAX6	PRICKLE1	SOX11	WNT2B	WNT6	WNT9A	WNT9B
GOBP_CORNIFICATION	https://www.gsea-msigdb.org/gsea/msigdb/human/geneset/GOBP_CORNIFICATION	CASP14	CDSN	CERS3	CYP26B1	KLK5	LIPK	LIPM	LIPN	TMEM79
GOBP_CORNIFIED_ENVELOPE_ASSEMBLY	https://www.gsea-msigdb.org/gsea/msigdb/human/geneset/GOBP_CORNIFIED_ENVELOPE_ASSEMBLY	DMKN	HDAC3	MAFB	STX2	STX4	UGCG
GOBP_CORONARY_ARTERY_MORPHOGENESIS	https://www.gsea-msigdb.org/gsea/msigdb/human/geneset/GOBP_CORONARY_ARTERY_MORPHOGENESIS	ARID2	HAND2	LRP2	NOTCH1	NRP1	SEC24B	TBX1	TGFBR1	VEGFA
GOBP_CORONARY_VASCULATURE_DEVELOPMENT	https://www.gsea-msigdb.org/gsea/msigdb/human/geneset/GOBP_CORONARY_VASCULATURE_DEVELOPMENT	ABCC9	ACE	ADAMTS6	AP2B1	APELA	APLN	APLNR	ARID2	BMP4	CNTRL	DCTN5	DYNC2H1	FGF2	GATA6	GPC3	GPER1	HAND2	HEY2	KCNJ8	LRP2	MEGF8	MESP1	MIR1-1	MIR145	MMP21	MYOCD	NDST1	NOTCH1	NRP1	PDGFRB	PLXND1	PRDM1	PRICKLE1	PTK7	SEC24B	SETD2	SGCD	SMAD6	SNX17	SPRED1	SRF	SUFU	TAB1	TBX1	TBX5	TGFBR1	TGFBR3	VEGFA
GOBP_CORONARY_VASCULATURE_MORPHOGENESIS	https://www.gsea-msigdb.org/gsea/msigdb/human/geneset/GOBP_CORONARY_VASCULATURE_MORPHOGENESIS	ACE	ARID2	FGF2	HAND2	HEY2	LRP2	MIR1-1	NOTCH1	NRP1	PDGFRB	SEC24B	SETD2	SGCD	SPRED1	TBX1	TBX5	TGFBR1	TGFBR3	VEGFA
GOBP_CORPUS_CALLOSUM_DEVELOPMENT	https://www.gsea-msigdb.org/gsea/msigdb/human/geneset/GOBP_CORPUS_CALLOSUM_DEVELOPMENT	ATG16L1	C12orf57	CDK5	CORO1C	EPHB2	EPHB3	HERC1	KCNA1	KCNA2	KCNA3	KCNC1	LPAR1	NIN	NSUN5	PAFAH1B1	PRDM8	PTPRS	RPGRIP1L	RTN4R	RTN4RL1	RYK	SZT2	TSKU	WDR37	WDR47	WDR89
GOBP_CORPUS_CALLOSUM_MORPHOGENESIS	https://www.gsea-msigdb.org/gsea/msigdb/human/geneset/GOBP_CORPUS_CALLOSUM_MORPHOGENESIS	C12orf57	NIN	PAFAH1B1	PRDM8	SZT2	TSKU
GOBP_CORTICAL_ACTIN_CYTOSKELETON_ORGANIZATION	https://www.gsea-msigdb.org/gsea/msigdb/human/geneset/GOBP_CORTICAL_ACTIN_CYTOSKELETON_ORGANIZATION	AKAP11	ANLN	ARF6	CALR	CAVIN3	DLG1	ECT2	EHD2	EPB41	EPB41L1	EPB41L2	EPB41L3	EZR	FHOD1	FHOD3	FMNL1	FMNL2	FMNL3	IKBKB	IQGAP1	IQGAP2	IQGAP3	LCP1	LLGL1	LLGL2	NCKAP1	NCKAP1L	PDCD6IP	PLEC	PLEK	PLS1	RAB13	RACGAP1	RHOQ	ROCK1	ROCK2	RTKN	STRIP1	TLN1	TNF	VIL1	VPS4A
GOBP_CORTICAL_CYTOSKELETON_ORGANIZATION	https://www.gsea-msigdb.org/gsea/msigdb/human/geneset/GOBP_CORTICAL_CYTOSKELETON_ORGANIZATION	AKAP11	ANLN	ARF6	CALR	CAVIN3	DLG1	ECT2	EHD2	EPB41	EPB41L1	EPB41L2	EPB41L3	EZR	FHOD1	FHOD3	FMNL1	FMNL2	FMNL3	IKBKB	IQGAP1	IQGAP2	IQGAP3	LCP1	LLGL1	LLGL2	NCKAP1	NCKAP1L	NLGN1	PAFAH1B1	PDCD6IP	PLEC	PLEK	PLS1	PPP2R3C	RAB13	RAC1	RAC3	RACGAP1	RHOG	RHOQ	ROCK1	ROCK2	RTKN	STRIP1	TLN1	TNF	TRPV4	VIL1
GOBP_CORTICOSPINAL_TRACT_MORPHOGENESIS	https://www.gsea-msigdb.org/gsea/msigdb/human/geneset/GOBP_CORTICOSPINAL_TRACT_MORPHOGENESIS	CDH11	EPHA4	FBXO45	NIN	PRDM8	SCN1B	SLIT2	SPG11
GOBP_CORTICOSTEROID_HORMONE_SECRETION	https://www.gsea-msigdb.org/gsea/msigdb/human/geneset/GOBP_CORTICOSTEROID_HORMONE_SECRETION	AGT	AGTR1	BMP6	C1QTNF1	CRH	CRHR1	CRY1	CRY2	DAB2	GAL	GALR1	GHRL	KCNQ1	POMC	PTPN11	REN	SELENOM	TSPO	WNK4
GOBP_CORTICOSTEROID_RECEPTOR_SIGNALING_PATHWAY	https://www.gsea-msigdb.org/gsea/msigdb/human/geneset/GOBP_CORTICOSTEROID_RECEPTOR_SIGNALING_PATHWAY	ARID1A	BMAL1	CALR	CLOCK	CRY1	CRY2	JAK2	LMO3	NEDD4	NR3C1	PER1	PHB1	PTGES3	YWHAH
GOBP_CORTICOSTERONE_SECRETION	https://www.gsea-msigdb.org/gsea/msigdb/human/geneset/GOBP_CORTICOSTERONE_SECRETION	CRHR1	KCNQ1	POMC	SELENOM	TSPO
GOBP_CORTICOTROPIN_SECRETION	https://www.gsea-msigdb.org/gsea/msigdb/human/geneset/GOBP_CORTICOTROPIN_SECRETION	AQP1	CRH	CRHBP	CRHR1	GHRL	RAB8B	UCN
GOBP_CORTISOL_BIOSYNTHETIC_PROCESS	https://www.gsea-msigdb.org/gsea/msigdb/human/geneset/GOBP_CORTISOL_BIOSYNTHETIC_PROCESS	BMP2	BMP5	CACNA1H	CYP11B1	CYP11B2	DGKQ	DKK3	H6PD	REST	WNT4
GOBP_CORTISOL_METABOLIC_PROCESS	https://www.gsea-msigdb.org/gsea/msigdb/human/geneset/GOBP_CORTISOL_METABOLIC_PROCESS	BMP2	BMP5	CACNA1H	CYP11A1	CYP11B1	CYP11B2	DGKQ	DKK3	H6PD	HSD11B2	REST	WNT4
GOBP_CORTISOL_SECRETION	https://www.gsea-msigdb.org/gsea/msigdb/human/geneset/GOBP_CORTISOL_SECRETION	CRH	GAL	GALR1	GHRL	PTPN11
GOBP_COTRANSLATIONAL_PROTEIN_TARGETING_TO_MEMBRANE	https://www.gsea-msigdb.org/gsea/msigdb/human/geneset/GOBP_COTRANSLATIONAL_PROTEIN_TARGETING_TO_MEMBRANE	ARL6IP1	BHLHE40-AS1	GJD2-DT	LOC101929130	RN7SL1	RN7SL2	RN7SL3	SEC61A1	SEC61A2	SEC61B	SEC62	SEC63	SIL1	SNAP25-AS1	SRP14	SRP19	SRP54	SRP68	SRP72	SRP9	SRPRA	SRPRB	SSR1	SSR2	SSR3	TRAM1	TRAM1L1	TRAM2	TTC9-DT	ZFAND2B
GOBP_CO_TRANSCRIPTIONAL_MRNA_3_END_PROCESSING_CLEAVAGE_AND_POLYADENYLATION_PATHWAY	https://www.gsea-msigdb.org/gsea/msigdb/human/geneset/GOBP_CO_TRANSCRIPTIONAL_MRNA_3_END_PROCESSING_CLEAVAGE_AND_POLYADENYLATION_PATHWAY	CDC73	CPSF3	CSTF3	PCF11	POLR2D
GOBP_CO_TRANSCRIPTIONAL_RNA_3_END_PROCESSING_CLEAVAGE_AND_POLYADENYLATION_PATHWAY	https://www.gsea-msigdb.org/gsea/msigdb/human/geneset/GOBP_CO_TRANSCRIPTIONAL_RNA_3_END_PROCESSING_CLEAVAGE_AND_POLYADENYLATION_PATHWAY	CDC73	CPSF1	CPSF3	CSTF3	PCF11	POLR2D
GOBP_CRANIAL_GANGLION_DEVELOPMENT	https://www.gsea-msigdb.org/gsea/msigdb/human/geneset/GOBP_CRANIAL_GANGLION_DEVELOPMENT	CTNNB1	NRP1	NRP2	SIX1	SIX4
GOBP_CRANIAL_NERVE_DEVELOPMENT	https://www.gsea-msigdb.org/gsea/msigdb/human/geneset/GOBP_CRANIAL_NERVE_DEVELOPMENT	ACKR3	ADARB1	ATOH7	ATP8B1	CHD7	CHRNB2	CITED2	CNGB1	CTNNB1	DCANP1	DRGX	EGR2	EPHB1	EPHB2	ERBB3	EXT1	GLI3	HES1	HOXA1	HOXA3	HOXB1	HOXB2	HOXB3	HOXD3	ISL1	KCNA1	KCNA2	KCNA3	KCNC1	KCNC2	LPAR1	MAFB	NAV2	NDP	NEUROG1	NKX2-2	NPR2	NRP1	NRP2	NTRK1	PAX2	PHOX2A	PHOX2B	PLXNA1	PLXNA3	PLXNA4	POU4F1	POU4F3
GOBP_CRANIAL_NERVE_FORMATION	https://www.gsea-msigdb.org/gsea/msigdb/human/geneset/GOBP_CRANIAL_NERVE_FORMATION	ATP8B1	DCANP1	HOXA1	MAFB	NEUROG1	PAX2	PHOX2A	PLXNA1	PLXNA3	TFAP2A	TIFAB
GOBP_CRANIAL_NERVE_MORPHOGENESIS	https://www.gsea-msigdb.org/gsea/msigdb/human/geneset/GOBP_CRANIAL_NERVE_MORPHOGENESIS	ADARB1	ATP8B1	CHRNB2	CITED2	DCANP1	EGR2	EPHB1	EPHB2	GLI3	HOXA1	HOXA3	HOXB1	HOXB2	HOXB3	HOXD3	KCNA2	MAFB	NEUROG1	NRP1	NRP2	PAX2	PHOX2A	PLXNA1	PLXNA3	PLXNA4	SEMA3F	SIX1	TBX1	TFAP2A	TIFAB
GOBP_CRANIAL_NERVE_STRUCTURAL_ORGANIZATION	https://www.gsea-msigdb.org/gsea/msigdb/human/geneset/GOBP_CRANIAL_NERVE_STRUCTURAL_ORGANIZATION	EGR2	HOXB1	HOXB2	KCNA2	NRP1	NRP2	PAX2	PLXNA3	PLXNA4	SEMA3F
GOBP_CRANIAL_SKELETAL_SYSTEM_DEVELOPMENT	https://www.gsea-msigdb.org/gsea/msigdb/human/geneset/GOBP_CRANIAL_SKELETAL_SYSTEM_DEVELOPMENT	BMP4	CEP55	CHST11	COLEC10	CPLANE2	CRKL	CTNNB1	DCANP1	DLX2	EDNRA	EIF4A3	EXT1	FGF4	FGF8	FGFR2	FOXC2	FOXE1	FOXN3	FREM1	GLI3	GNA11	GRHL2	HOXA1	HOXA2	IFT140	INSIG1	INSIG2	IRF6	IRX5	LHX1	MED12	MEGF8	MMP14	MMP16	MSX2	MTHFD1	MTHFD1L	NDST1	NEUROG1	NIPBL	NODAL	NOG	PAX5	PDGFRA	PRRX1	RAB23	RDH10	RIC1
GOBP_CRANIAL_SUTURE_MORPHOGENESIS	https://www.gsea-msigdb.org/gsea/msigdb/human/geneset/GOBP_CRANIAL_SUTURE_MORPHOGENESIS	BMP4	FGF4	GLI3	INSIG1	INSIG2	MSX2	TGFB3	TWIST1
GOBP_CRANIOFACIAL_SUTURE_MORPHOGENESIS	https://www.gsea-msigdb.org/gsea/msigdb/human/geneset/GOBP_CRANIOFACIAL_SUTURE_MORPHOGENESIS	BMP4	DCANP1	FGF4	FOXN3	FREM1	GLI3	INSIG1	INSIG2	MEGF8	MMP14	MMP16	MSX2	NEUROG1	RAB23	TGFB3	TIFAB	TMEM107	TWIST1
GOBP_CRD_MEDIATED_MRNA_STABILIZATION	https://www.gsea-msigdb.org/gsea/msigdb/human/geneset/GOBP_CRD_MEDIATED_MRNA_STABILIZATION	CSDE1	DHX9	HNRNPD	HNRNPU	IGF2BP1	IGF2BP2	IGF2BP3	PABPC1	PAIP1	SYNCRIP	YBX1
GOBP_CRISTAE_FORMATION	https://www.gsea-msigdb.org/gsea/msigdb/human/geneset/GOBP_CRISTAE_FORMATION	ADCK1	AFG3L2	APOO	APOOL	CHCHD10	CHCHD3	CHCHD6	DNAJC11	IMMT	LETM1	MICOS10	MICOS13	OMA1	PINK1	SAMM50	SLC25A46	TAFAZZIN	UQCC3
GOBP_CUT_CATABOLIC_PROCESS	https://www.gsea-msigdb.org/gsea/msigdb/human/geneset/GOBP_CUT_CATABOLIC_PROCESS	DIS3	EXOSC10	EXOSC2	EXOSC3	ZCCHC7
GOBP_CYCLIC_GMP_AMP_TRANSMEMBRANE_IMPORT_ACROSS_PLASMA_MEMBRANE	https://www.gsea-msigdb.org/gsea/msigdb/human/geneset/GOBP_CYCLIC_GMP_AMP_TRANSMEMBRANE_IMPORT_ACROSS_PLASMA_MEMBRANE	LRRC8A	LRRC8C	LRRC8D	LRRC8E	SLC19A1	SLC46A2
GOBP_CYCLIC_NUCLEOTIDE_BIOSYNTHETIC_PROCESS	https://www.gsea-msigdb.org/gsea/msigdb/human/geneset/GOBP_CYCLIC_NUCLEOTIDE_BIOSYNTHETIC_PROCESS	ADCY1	ADCY10	ADCY2	ADCY3	ADCY4	ADCY5	ADCY6	ADCY7	ADCY8	ADCY9	GUCY1A1	GUCY1A2	GUCY1B1	GUCY2C	GUCY2D	GUCY2F	NPPA	NPPB	NPPC	NPR1	NPR2
GOBP_CYCLIC_NUCLEOTIDE_CATABOLIC_PROCESS	https://www.gsea-msigdb.org/gsea/msigdb/human/geneset/GOBP_CYCLIC_NUCLEOTIDE_CATABOLIC_PROCESS	CNP	PDE10A	PDE1A	PDE2A	PDE4A	PDE4B	PDE4C	PDE4D	PDE5A	PDE7A	PDE7B	PDE8A	PDE8B	PDE9A
GOBP_CYCLIC_NUCLEOTIDE_MEDIATED_SIGNALING	https://www.gsea-msigdb.org/gsea/msigdb/human/geneset/GOBP_CYCLIC_NUCLEOTIDE_MEDIATED_SIGNALING	ADCY1	ADCY2	ADCYAP1	ADCYAP1R1	ADGRG6	ADM	ADNP	ADORA2B	AHR	AKAP6	APLNR	APOE	AQP1	ATF1	CAP1	CAP2	CD36	CDC34	CGAS	CREB1	DEFB1	DGKQ	EDNRB	ENSG00000290147	EPHA5	FFAR4	GAL	GHRHR	GIP	GIPR	GLP1R	GNAI1	GPR3	GPR61	GPR62	GUCA1A	GUCA2B	GUCY1A1	GUCY1A2	GUCY1B1	GUCY2D	GUCY2F	HTR2B	HTR2C	INS	INSL3	IRAG1	KCNC2
GOBP_CYCLIC_NUCLEOTIDE_METABOLIC_PROCESS	https://www.gsea-msigdb.org/gsea/msigdb/human/geneset/GOBP_CYCLIC_NUCLEOTIDE_METABOLIC_PROCESS	ADCY1	ADCY10	ADCY2	ADCY3	ADCY4	ADCY5	ADCY6	ADCY7	ADCY8	ADCY9	AMPD2	CACNB4	CNP	EPHA2	GUCY1A1	GUCY1A2	GUCY1B1	GUCY2C	GUCY2D	GUCY2F	NPPA	NPPB	NPPC	NPR1	NPR2	PDE10A	PDE1A	PDE2A	PDE4A	PDE4B	PDE4C	PDE4D	PDE5A	PDE7A	PDE7B	PDE8A	PDE8B	PDE9A	PTH	PTHLH	RORA
GOBP_CYCLIC_NUCLEOTIDE_TRANSPORT	https://www.gsea-msigdb.org/gsea/msigdb/human/geneset/GOBP_CYCLIC_NUCLEOTIDE_TRANSPORT	ABCC1	ABCC4	ABCC5	LRRC8A	LRRC8C	LRRC8D	LRRC8E	SLC19A1	SLC46A2
GOBP_CYCLOOXYGENASE_PATHWAY	https://www.gsea-msigdb.org/gsea/msigdb/human/geneset/GOBP_CYCLOOXYGENASE_PATHWAY	AKR1C3	CBR1	PTGDS	PTGES2	PTGES3	PTGIS	PTGS1	PTGS2	TBXAS1
GOBP_CYSTEINE_METABOLIC_PROCESS	https://www.gsea-msigdb.org/gsea/msigdb/human/geneset/GOBP_CYSTEINE_METABOLIC_PROCESS	AGXT	CBS	CDO1	CSAD	CTH	ENSG00000274276	GCLC	GCLM	GGT1	MPST	MTHFD1	SLC7A11
GOBP_CYTIDINE_METABOLIC_PROCESS	https://www.gsea-msigdb.org/gsea/msigdb/human/geneset/GOBP_CYTIDINE_METABOLIC_PROCESS	AICDA	APOBEC1	APOBEC2	APOBEC3A	APOBEC3B	APOBEC3C	APOBEC3D	APOBEC3F	APOBEC3G	APOBEC3H	CDA	CDADC1
GOBP_CYTIDINE_TO_URIDINE_EDITING	https://www.gsea-msigdb.org/gsea/msigdb/human/geneset/GOBP_CYTIDINE_TO_URIDINE_EDITING	A1CF	AICDA	APOBEC1	APOBEC2	APOBEC3A	APOBEC3B	APOBEC3C	APOBEC3D	APOBEC3F	APOBEC3G	APOBEC3H	RBM47
GOBP_CYTOCHROME_COMPLEX_ASSEMBLY	https://www.gsea-msigdb.org/gsea/msigdb/human/geneset/GOBP_CYTOCHROME_COMPLEX_ASSEMBLY	BCS1L	COA1	COA3	COA4	COA5	COA6	COA8	COX10	COX14	COX15	COX16	COX17	COX18	COX19	COX20	CYBA	FASTKD3	HCCS	LYRM7	MT-CO3	PET100	PET117	SCO1	SCO2	SLC25A33	SLC25A46	SMIM20	STMP1	SURF1	TACO1	TIMM21	TMEM223	TTC19	UQCC1	UQCC2	UQCC3	UQCC4	UQCC5	UQCC6	UQCRFS1
GOBP_CYTOKINESIS	https://www.gsea-msigdb.org/gsea/msigdb/human/geneset/GOBP_CYTOKINESIS	ACTR2	ACTR3	AHCTF1	ALKBH4	ANK3	ANKRD53	ANLN	ANXA11	APC	ARF1	ARL3	AURKA	AURKB	AURKC	BBS4	BCL2L1	BECN1	BIN3	BIRC5	BIRC6	BRCA2	CALM1	CALM2	CALM3	CCP110	CDC14A	CDC14B	CDC14C	CDC25B	CDC42	CDC6	CDCA8	CECR2	CENPA	CENPV	CEP55	CETN2	CFL1	CHMP1A	CHMP1B	CHMP2A	CHMP2B	CHMP3	CHMP4A	CHMP4B	CHMP4BP1	CHMP4C	CHMP5
GOBP_CYTOKINETIC_PROCESS	https://www.gsea-msigdb.org/gsea/msigdb/human/geneset/GOBP_CYTOKINETIC_PROCESS	ALKBH4	ANLN	ANXA11	ARF1	AURKB	BIN3	CEP55	CHMP1A	CHMP1B	CHMP2A	CHMP2B	CHMP3	CHMP4A	CHMP4B	CHMP4BP1	CHMP4C	CHMP5	CHMP6	CHMP7	CNTROB	ECT2	IQGAP1	IQGAP2	IQGAP3	KIF20A	KIF20B	KLHDC8B	MITD1	MYH9	NUP62	PDCD6IP	PLEC	RACGAP1	RHOA	RTKN	SNX18	SNX33	SNX9	SPAST	SPIRE1	SPIRE2	VPS4A	VPS4B
GOBP_CYTOKINE_MEDIATED_SIGNALING_PATHWAY	https://www.gsea-msigdb.org/gsea/msigdb/human/geneset/GOBP_CYTOKINE_MEDIATED_SIGNALING_PATHWAY	ACKR1	ACKR2	ACKR3	ACKR4	ACSL1	ACTN4	ADAM17	ADAR	ADIPOQ	ADIPOR1	ADIPOR2	AGPAT1	AGPAT2	AIM2	AKT1	ANGPT1	APOA1	APPL1	APPL2	ARG1	AXL	AZI2	BAD	BBS2	BBS4	BIRC2	BIRC3	BIRC7	C1QTNF4	CACTIN	CARD14	CARD16	CARD8	CASP1	CASP4	CASP8	CAV1	CBL	CCDC3	CCL1	CCL11	CCL13	CCL14	CCL15	CCL16	CCL17	CCL18	CCL19
GOBP_CYTOKINE_PRODUCTION	https://www.gsea-msigdb.org/gsea/msigdb/human/geneset/GOBP_CYTOKINE_PRODUCTION	ABCC8	ABCD1	ABCD2	ABL1	ACE2	ACKR1	ACOD1	ACP5	ADAM17	ADAM8	ADAMTS3	ADCY7	ADCYAP1	ADGRG1	ADIPOQ	ADORA2B	ADRA2A	AFAP1L2	AGER	AGPAT1	AGPAT2	AGT	AIF1	AIM2	AIRE	AKAP12	AKAP8	AKIRIN2	ALOX15B	ALOX5	ANGPT1	ANXA1	ANXA4	APOA1	APOA2	APOD	APP	APPL1	APPL2	ARFGEF2	ARG1	ARG2	ARHGEF2	ARID5A	ARNT	ARRB1	ARRB2	ARRDC4
GOBP_CYTOKINE_PRODUCTION_INVOLVED_IN_IMMUNE_RESPONSE	https://www.gsea-msigdb.org/gsea/msigdb/human/geneset/GOBP_CYTOKINE_PRODUCTION_INVOLVED_IN_IMMUNE_RESPONSE	ACP5	ANGPT1	APOA1	APOA2	ARG1	ARID5A	ATG5	AXL	B2M	BCL10	BCL6	BST2	BTK	CAMK4	CARD9	CCR2	CD160	CD226	CD36	CD55	CD74	CD81	CD96	CLC	CLEC7A	CLNK	CUEDC2	DDX1	DDX21	DENND1B	DHX36	EPX	F2RL1	FFAR2	FFAR3	FOXP3	FZD5	GATA3	GPRC5B	HFE	HK1	HLA-A	HLA-E	HLA-F	HLA-G	IFNA2	IFNB1	IL10
GOBP_CYTOKINE_PRODUCTION_INVOLVED_IN_INFLAMMATORY_RESPONSE	https://www.gsea-msigdb.org/gsea/msigdb/human/geneset/GOBP_CYTOKINE_PRODUCTION_INVOLVED_IN_INFLAMMATORY_RESPONSE	ABCD1	ABCD2	ADCY7	ALOX5	APOD	APPL1	APPL2	BAP1	CARD9	CD6	CHID1	CLEC7A	CUEDC2	EPHB2	EXTL3	EZH2	F2	GBP5	GPSM3	H19	HIF1A	IL17A	IL17B	IL17D	IL17F	IL17RA	IL17RC	IL1R2	IL6	KPNA6	LEP	LILRB4	MACIR	MAPK14	MAPK9	MEFV	MIR125A	MIR129-1	MIR135A1	MIR136	MIR140	MIR146A	MIR16-1	MIR17	MIR197	MIR203A	MIR21	MIR221
GOBP_CYTOLYSIS	https://www.gsea-msigdb.org/gsea/msigdb/human/geneset/GOBP_CYTOLYSIS	CAMP	GBP1	GBP2	GBP3	GBP5	GBP7	RNASE7
GOBP_CYTOLYSIS_BY_HOST_OF_SYMBIONT_CELLS	https://www.gsea-msigdb.org/gsea/msigdb/human/geneset/GOBP_CYTOLYSIS_BY_HOST_OF_SYMBIONT_CELLS	APOL1	CFHR1	CFHR2	CFHR5	F2	HRG	ROMO1
GOBP_CYTOPLASMIC_MICROTUBULE_ORGANIZATION	https://www.gsea-msigdb.org/gsea/msigdb/human/geneset/GOBP_CYTOPLASMIC_MICROTUBULE_ORGANIZATION	AXIN1	CAMSAP2	CAV3	CCDC13	CCDC88A	CCDC88B	CCDC88C	CENPJ	CEP120	CEP126	CHP1	CIB1	CLASP1	CLIP1	CLIP2	CLIP3	CLIP4	CRIPT	DLG1	DVL1	DYNC1H1	EZR	FSD1	HOOK1	HOOK2	HOOK3	IFT172	KATNA1	KATNAL1	KATNAL2	KATNB1	KATNBL1	KIF19	KPNB1	LIMK2	MAP10	MAPT	NUMA1	PAFAH1B1	PCM1	PLK3	RAB11A	RHOA	SLAIN1	SLAIN2	SLK	STMN3	TBCB
GOBP_CYTOPLASMIC_SEQUESTERING_OF_NF_KAPPAB	https://www.gsea-msigdb.org/gsea/msigdb/human/geneset/GOBP_CYTOPLASMIC_SEQUESTERING_OF_NF_KAPPAB	CCDC22	FAF1	G3BP2	IL10	NFKBIA	NFKBIB	PSMD10	TMSB4X
GOBP_CYTOPLASMIC_SEQUESTERING_OF_PROTEIN	https://www.gsea-msigdb.org/gsea/msigdb/human/geneset/GOBP_CYTOPLASMIC_SEQUESTERING_OF_PROTEIN	CCDC22	CTNND1	DBN1	DZIP1	FAF1	FLNA	G3BP2	GET4	IL10	KEAP1	LATS1	MDFI	NFKBIA	NFKBIB	NFKBIE	PKD1	PKD2	PSMD10	PTPRM	SUFU	TMSB4X	YWHAB
GOBP_CYTOPLASMIC_SEQUESTERING_OF_TRANSCRIPTION_FACTOR	https://www.gsea-msigdb.org/gsea/msigdb/human/geneset/GOBP_CYTOPLASMIC_SEQUESTERING_OF_TRANSCRIPTION_FACTOR	CCDC22	FAF1	G3BP2	IL10	KEAP1	MDFI	NFKBIA	NFKBIB	NFKBIE	PKD1	PKD2	PSMD10	SUFU	TMSB4X
GOBP_CYTOPLASMIC_TRANSLATION	https://www.gsea-msigdb.org/gsea/msigdb/human/geneset/GOBP_CYTOPLASMIC_TRANSLATION	AARS1	CNBP	CPEB1	CPEB2	CPEB3	CPEB4	CSDE1	DENR	DHX29	DHX36	DHX9	DRG1	DRG2	EIF2AK4	EIF2B3	EIF2D	EIF2S2	EIF2S3	EIF2S3B	EIF3A	EIF3B	EIF3C	EIF3CL	EIF3D	EIF3E	EIF3F	EIF3G	EIF3H	EIF3I	EIF3J	EIF3K	EIF3L	EIF3M	EIF4A1	EIF4A2	EIF4G1	EIF5	ETF1	FAU	FMR1	FTSJ1	HNRNPD	HNRNPU	IGF2BP1	IMPACT	LIN28A	MCTS1	MCTS2
GOBP_CYTOPLASMIC_TRANSLATIONAL_ELONGATION	https://www.gsea-msigdb.org/gsea/msigdb/human/geneset/GOBP_CYTOPLASMIC_TRANSLATIONAL_ELONGATION	AARS1	CPEB2	CPEB3	NEMF	RPLP2
GOBP_CYTOPLASMIC_TRANSLATIONAL_INITIATION	https://www.gsea-msigdb.org/gsea/msigdb/human/geneset/GOBP_CYTOPLASMIC_TRANSLATIONAL_INITIATION	DENR	DHX29	EIF2AK4	EIF2B3	EIF2D	EIF2S2	EIF2S3	EIF2S3B	EIF3A	EIF3B	EIF3C	EIF3CL	EIF3D	EIF3E	EIF3F	EIF3G	EIF3H	EIF3I	EIF3J	EIF3K	EIF3L	EIF3M	EIF4A1	EIF4A2	EIF4G1	EIF5	IMPACT	MCTS1	MCTS2	METTL3	MIF4GD	MTOR	NCBP1	NCBP2	NCK1	RBM4	RPL13A	SH3BGRL	SLBP	YTHDF2
GOBP_CYTOPLASM_ORGANIZATION	https://www.gsea-msigdb.org/gsea/msigdb/human/geneset/GOBP_CYTOPLASM_ORGANIZATION	ETV6	FOSL1	KIF5B	NAGLU	PADI6	PLD6	RRN3	SOS1	TDRD1	TDRD5	TDRD6	TDRD7	TDRKH	TFCP2L1	ZMIZ1
GOBP_CYTOSKELETON_DEPENDENT_CYTOKINESIS	https://www.gsea-msigdb.org/gsea/msigdb/human/geneset/GOBP_CYTOSKELETON_DEPENDENT_CYTOKINESIS	ACTR2	ACTR3	ALKBH4	ANK3	ANKRD53	ANLN	APC	ARF1	ARL3	AURKB	BBS4	BIN3	BIRC5	CDCA8	CECR2	CENPA	CEP55	CFL1	CHMP1A	CHMP1B	CHMP2A	CHMP2B	CHMP3	CHMP4A	CHMP4B	CHMP4BP1	CHMP4C	CHMP5	CHMP6	CHMP7	CIT	CKAP2	CNTROB	CUL7	DCDC1	DCTN3	ECT2	EFHC1	ESPL1	EXOC1	EXOC2	EXOC3	EXOC4	EXOC5	EXOC6	EXOC6B	EXOC7	EXOC8
GOBP_CYTOSKELETON_DEPENDENT_INTRACELLULAR_TRANSPORT	https://www.gsea-msigdb.org/gsea/msigdb/human/geneset/GOBP_CYTOSKELETON_DEPENDENT_INTRACELLULAR_TRANSPORT	ACTN4	ACTR10	AGBL4	AGTPBP1	AP3B1	AP3B2	AP3D1	AP3M1	AP3M2	AP3S1	AP3S2	APBA1	APP	ARHGAP21	ARL3	ARL8A	ARL8B	ARMCX3	BAG3	BBS12	BICD1	BICD2	BICDL1	BICDL2	BLOC1S1	BLOC1S2	BLOC1S3	BLOC1S4	BLOC1S5	BLOC1S6	BORCS5	BORCS6	BORCS7	BORCS8	CALY	CAMSAP3	CCDC186	CCDC38	CCDC88A	CCDC88B	CCDC88C	CDC42	CDR2L	CEP131	CILK1	CLIP3	CLN3	CLUAP1
GOBP_CYTOSKELETON_ORGANIZATION	https://www.gsea-msigdb.org/gsea/msigdb/human/geneset/GOBP_CYTOSKELETON_ORGANIZATION	AAAS	ABI1	ABI2	ABI3	ABITRAM	ABL1	ABL2	ABLIM1	ABLIM2	ABLIM3	ABRAXAS1	ABRAXAS2	ACTA1	ACTB	ACTBL2	ACTC1	ACTG1	ACTL6B	ACTL7A	ACTL7B	ACTL8	ACTL9	ACTN1	ACTN2	ACTN3	ACTN4	ACTR2	ACTR3	ADD1	ADD2	ADD3	ADPRHL1	ADRA2A	AGAP2	AGFG1	AGRN	AIF1	AIF1L	AJUBA	AKAP11	AKAP13	AKAP9	ALDOA	ALKBH4	ALMS1	ALOX15	AMOT	AMOTL1
GOBP_CYTOSOLIC_PATTERN_RECOGNITION_RECEPTOR_SIGNALING_PATHWAY	https://www.gsea-msigdb.org/gsea/msigdb/human/geneset/GOBP_CYTOSOLIC_PATTERN_RECOGNITION_RECEPTOR_SIGNALING_PATHWAY	ALPK1	ANKRD17	ATAT1	BIRC2	BIRC3	BRCC3	BTK	C1QBP	CARD8	CAV1	CD36	CGAS	CLPB	COLEC12	CPTP	CSNK1A1	CYLD	DDX3X	DDX60	DHX33	DHX58	EIF2AK2	EPG5	ERBIN	F2RL1	FBXL2	FCRL3	FLOT1	FLOT2	GBP2	GBP5	GPATCH3	GRAMD4	HAVCR2	HMGB1	HSPA1A	HSPA1B	HSPA8	IFIH1	IKBKB	INAVA	IPO5	IRAK1	IRAK4	IRF3	IRF7	IRGM	ITCH
GOBP_CYTOSOLIC_RIBOSOME_ASSEMBLY	https://www.gsea-msigdb.org/gsea/msigdb/human/geneset/GOBP_CYTOSOLIC_RIBOSOME_ASSEMBLY	C1QBP	DDX3X	EFL1	EIF6	SBDS
GOBP_CYTOSOLIC_TRANSPORT	https://www.gsea-msigdb.org/gsea/msigdb/human/geneset/GOBP_CYTOSOLIC_TRANSPORT	ACTR2	AKTIP	ANKFY1	ANKRD27	AP1AR	AP1G1	AP2A1	AP4M1	ARFIP1	ARFRP1	ARL1	ARL8B	ASB15	ATG14	ATP9A	BAIAP3	BECN1	BET1L	BLTP3B	CCDC91	CES1	CHMP3	CLN3	CLN5	CLTC	CLTCL1	CORO1A	CORO7	DAB2	DCTN1	DENND10	DENND2A	DENND5A	DNAJC13	DOP1A	DOP1B	EEA1	EHD3	EIPR1	EMP2	EPS15	ERC1	EVI5	EZR	FHIP1B	FLNA	GAK	GBF1
GOBP_C_5_METHYLATION_OF_CYTOSINE	https://www.gsea-msigdb.org/gsea/msigdb/human/geneset/GOBP_C_5_METHYLATION_OF_CYTOSINE	DNMT1	DNMT3A	DNMT3B	DNMT3L	STPG4
GOBP_C_TERMINAL_PROTEIN_AMINO_ACID_MODIFICATION	https://www.gsea-msigdb.org/gsea/msigdb/human/geneset/GOBP_C_TERMINAL_PROTEIN_AMINO_ACID_MODIFICATION	AGBL1	AGBL4	AGBL5	AGTPBP1	ATG12	ATG16L1	ATG5	ATG7	FOLH1	FOLH1B	ICMT	IRGM	LCMT1
GOBP_C_TERMINAL_PROTEIN_LIPIDATION	https://www.gsea-msigdb.org/gsea/msigdb/human/geneset/GOBP_C_TERMINAL_PROTEIN_LIPIDATION	ATG12	ATG16L1	ATG5	ATG7	IRGM
GOBP_C_X_C_CHEMOKINE_RECEPTOR_CXCR4_SIGNALING_PATHWAY	https://www.gsea-msigdb.org/gsea/msigdb/human/geneset/GOBP_C_X_C_CHEMOKINE_RECEPTOR_CXCR4_SIGNALING_PATHWAY	CXCR4	ENTREP1	LYN	TREM2	WBP1L
GOBP_DAMP_METABOLIC_PROCESS	https://www.gsea-msigdb.org/gsea/msigdb/human/geneset/GOBP_DAMP_METABOLIC_PROCESS	ADA	ADK	DCK	DGUOK	NT5C1A	PNP	XDH
GOBP_DCMP_CATABOLIC_PROCESS	https://www.gsea-msigdb.org/gsea/msigdb/human/geneset/GOBP_DCMP_CATABOLIC_PROCESS	DPYD	DPYS	NT5C	UPB1	UPP1	UPP2
GOBP_DEADENYLATION_DEPENDENT_DECAPPING_OF_NUCLEAR_TRANSCRIBED_MRNA	https://www.gsea-msigdb.org/gsea/msigdb/human/geneset/GOBP_DEADENYLATION_DEPENDENT_DECAPPING_OF_NUCLEAR_TRANSCRIBED_MRNA	CAPRIN1	CNOT7	DCP1A	DCP1B	DCP2	DCPS	EIF4ENIF1	LSM1	NOCT	PATL1	PATL2
GOBP_DECIDUALIZATION	https://www.gsea-msigdb.org/gsea/msigdb/human/geneset/GOBP_DECIDUALIZATION	ASH1L	BSG	CITED2	CTSB	CYP27B1	DCAF13	DEDD	EPOR	GHRL	GHSR	GJB2	JUNB	LIF	NDP	PARP1	PARP2	PPARD	PTGS2	PTN	SPP1	STC1	STC2	TCF23	TPPP3	VDR
GOBP_DEDIFFERENTIATION	https://www.gsea-msigdb.org/gsea/msigdb/human/geneset/GOBP_DEDIFFERENTIATION	CDK6	ESRRB	FEZF1	FEZF2	HNRNPD	MIR145	MIR182	MIR214	MIR221	NCOA3	OLFM2	PDGFB
GOBP_DEFENSE_RESPONSE	https://www.gsea-msigdb.org/gsea/msigdb/human/geneset/GOBP_DEFENSE_RESPONSE	A2M	ABCC1	ABCC9	ABCD1	ABCD2	ABCF1	ABCF3	ABHD12	ABI3	ACE2	ACER3	ACKR1	ACKR2	ACOD1	ACP5	ACTG1	ACTR2	ACTR3	ACVR1	ADA	ADAM15	ADAM17	ADAM8	ADAMTS12	ADAMTS13	ADAMTS5	ADAR	ADARB1	ADCY1	ADCY7	ADCY8	ADGRB1	ADGRE2	ADGRE5	ADIPOQ	ADM	ADORA1	ADORA2A	ADORA2B	ADORA3	AFAP1L2	AGBL4	AGBL5	AGER	AGR2	AGT	AGTR1	AGTR2
GOBP_DEFENSE_RESPONSE_TO_BACTERIUM	https://www.gsea-msigdb.org/gsea/msigdb/human/geneset/GOBP_DEFENSE_RESPONSE_TO_BACTERIUM	ACP5	ADAM17	ADAMTS5	ADGRB1	AICDA	AKIRIN2	ANG	ANKRD17	ANXA3	AQP1	ARG2	AZU1	BCL3	BPI	BPIFA1	BPIFA2	C5AR1	CAMP	CARD9	CASP1	CASP4	CASP7	CCL20	CD160	CD36	CD4	CEBPB	CFP	CHGA	CLEC4D	CLEC4E	COLEC12	CRP	CST11	CTSG	CXCL13	CXCL6	CYBA	DCD	DEFA1	DEFA1B	DEFA3	DEFA4	DEFA5	DEFA6	DEFB1	DEFB103A	DEFB103B
GOBP_DEFENSE_RESPONSE_TO_FUNGUS	https://www.gsea-msigdb.org/gsea/msigdb/human/geneset/GOBP_DEFENSE_RESPONSE_TO_FUNGUS	ARG1	BCL10	CARD9	CHGA	CLEC4A	CLEC4C	CLEC4D	CLEC4E	CLEC6A	CLEC7A	COTL1	CTSG	CX3CR1	DCD	DEFA1	DEFA1B	DEFA3	DEFA4	DEFA5	DEFA6	DEFB106A	DEFB106B	DEFB114	DEFB119	DEFB136	DEFB4A	ELANE	FAM3A	GAPDH	GNLY	GPR15LG	HAMP	HRG	HTN1	HTN3	IL17A	IL17RA	IL17RC	IL36RN	JAGN1	LTF	MPO	NLRP10	PLA2G5	PLCG2	RARRES2	RNASE7	RNASE8
GOBP_DEFENSE_RESPONSE_TO_GRAM_NEGATIVE_BACTERIUM	https://www.gsea-msigdb.org/gsea/msigdb/human/geneset/GOBP_DEFENSE_RESPONSE_TO_GRAM_NEGATIVE_BACTERIUM	ADGRB1	AQP1	AZU1	BPI	CAMP	CD160	CD4	CHGA	CST11	CTSG	CXCL6	DEFA1	DEFA1B	DEFA3	DEFA4	DEFA5	DEFA6	DEFB1	DEFB103A	DEFB103B	DEFB104A	DEFB104B	DEFB106A	DEFB106B	DEFB107A	DEFB107B	DEFB114	DEFB118	DEFB119	DEFB126	DEFB127	DEFB128	DEFB132	DEFB136	DEFB4A	DMBT1	DROSHA	ELANE	F2	F2RL1	FCN2	GALP	GSDMD	H2BC11	H2BC12	HMGB2	IGHM	IL12B
GOBP_DEFENSE_RESPONSE_TO_GRAM_POSITIVE_BACTERIUM	https://www.gsea-msigdb.org/gsea/msigdb/human/geneset/GOBP_DEFENSE_RESPONSE_TO_GRAM_POSITIVE_BACTERIUM	ACP5	ADAM17	ANG	C5AR1	CAMP	CARD9	CASP4	CD36	CHGA	CRP	CTSG	DEFA1	DEFA1B	DEFA3	DEFA4	DEFA5	DEFA6	DEFB1	DEFB103A	DEFB103B	DEFB104A	DEFB104B	DEFB106A	DEFB106B	DEFB107A	DEFB107B	DEFB114	DEFB118	DEFB119	DEFB128	DEFB136	DEFB4A	DMBT1	DROSHA	EPHA2	FAU	FCN2	FGR	GBP2	GBP4	GBP6	GBP7	GPR15LG	GSDMD	H2BC10	H2BC11	H2BC12	H2BC12L
GOBP_DEFENSE_RESPONSE_TO_OTHER_ORGANISM	https://www.gsea-msigdb.org/gsea/msigdb/human/geneset/GOBP_DEFENSE_RESPONSE_TO_OTHER_ORGANISM	A2M	ABCC9	ABCF3	ACOD1	ACP5	ACTG1	ACTR2	ACTR3	ADAM15	ADAM17	ADAM8	ADAMTS13	ADAMTS5	ADAR	ADARB1	ADGRB1	AGBL4	AGBL5	AICDA	AIF1	AIM2	AIMP1	AKAP1	AKAP8	AKIRIN2	AKT1	ALPK1	ANG	ANKHD1	ANKRD17	ANXA1	ANXA3	AP1G1	AP3B1	APCS	APOA4	APOBEC3A	APOBEC3B	APOBEC3C	APOBEC3D	APOBEC3F	APOBEC3G	APOBEC3H	APOE	APOL1	APPL1	APPL2	AQP1
GOBP_DEFENSE_RESPONSE_TO_SYMBIONT	https://www.gsea-msigdb.org/gsea/msigdb/human/geneset/GOBP_DEFENSE_RESPONSE_TO_SYMBIONT	ABCC9	ABCF3	ACOD1	ADAR	ADARB1	AGBL4	AGBL5	AICDA	AIM2	AIMP1	AKAP1	APOBEC3A	APOBEC3B	APOBEC3C	APOBEC3D	APOBEC3F	APOBEC3G	APOBEC3H	ARMC5	ATAD3A	ATG12	ATG16L1	ATG5	ATG7	AZI2	AZU1	BCL2	BCL2L1	BECN1	BNIP3	BNIP3L	BPIFA1	BST2	C1QBP	CARD8	CARD9	CASP1	CCDC92	CD207	CD40	CGAS	CHMP3	CLPB	CNOT7	CPTP	CRCP	CSNK1A1	CXCL10
GOBP_DEFENSE_RESPONSE_TO_TUMOR_CELL	https://www.gsea-msigdb.org/gsea/msigdb/human/geneset/GOBP_DEFENSE_RESPONSE_TO_TUMOR_CELL	ABI3	CASC2	DAPK1	DLEC1	KLF4	LAPTM5	PLK5	PRDX2	PRF1	RBMS3	RELA	SPI1	TNFRSF10B
GOBP_DEFINITIVE_HEMOPOIESIS	https://www.gsea-msigdb.org/gsea/msigdb/human/geneset/GOBP_DEFINITIVE_HEMOPOIESIS	ADAR	BCR	CBFB	CDK5RAP3	GATA1	GATA2	HIPK1	HOXA9	HOXB3	HOXB4	KMT2A	LYL1	MEIS1	MFAP5	SP3	TAL1	TEK	TGFBR3	ZFP36L2	ZFPM1
GOBP_DEHYDROASCORBIC_ACID_TRANSPORT	https://www.gsea-msigdb.org/gsea/msigdb/human/geneset/GOBP_DEHYDROASCORBIC_ACID_TRANSPORT	SLC23A1	SLC2A1	SLC2A10	SLC2A14	SLC2A2	SLC2A3	SLC2A4	SLC2A6	SLC2A8
GOBP_DELAMINATION	https://www.gsea-msigdb.org/gsea/msigdb/human/geneset/GOBP_DELAMINATION	ABCA12	AKNA	CDSN	METTL3	SPI1	TRPV4	YTHDF2
GOBP_DEMETHYLATION	https://www.gsea-msigdb.org/gsea/msigdb/human/geneset/GOBP_DEMETHYLATION	A1CF	AICDA	ALKBH1	ALKBH2	ALKBH3	ALKBH4	ALKBH5	APEX1	APOBEC1	APOBEC2	APOBEC3A	APOBEC3B	APOBEC3C	APOBEC3D	APOBEC3F	APOBEC3G	APOBEC3H	CYP1A2	CYP2C8	CYP2C9	CYP2D6	CYP3A4	CYP3A43	CYP3A5	CYP3A7	DPPA3	EOMES	FBXL19	FTO	GATA3	HNRNPAB	JMJD6	KDM1A	KDM2A	KDM2B	KDM6A	KDM6B	KDM7A	MMACHC	OTUD4	PAX6	PHF2	PHF8	PPME1	STPG1	STPG4	TDG	TET1
GOBP_DENDRITE_ARBORIZATION	https://www.gsea-msigdb.org/gsea/msigdb/human/geneset/GOBP_DENDRITE_ARBORIZATION	CHRNA7	IGF2BP1	NRP1	PHACTR1	PTN	SEMA3A	SULT4A1	TAOK2	TPBG	ZNF365
GOBP_DENDRITE_DEVELOPMENT	https://www.gsea-msigdb.org/gsea/msigdb/human/geneset/GOBP_DENDRITE_DEVELOPMENT	ABI1	ABI2	ABI3	ABITRAM	ABL1	ACTL6B	ADGRB3	ALK	ANAPC2	ANKRD27	APOE	APP	ARC	ARF4	ARF6	ARHGAP33	ARHGAP44	ARMCX5-GPRASP2	ASAP1	BAIAP2	BBS1	BBS4	BCL11A	BMP5	BMP7	BTBD3	C21orf91	CAMK1	CAMK1D	CAMK2A	CAMK2B	CAMSAP2	CAPRIN1	CAPRIN2	CARM1	CD3E	CDC42	CDK5	CDK5R1	CDKL3	CDKL5	CELSR2	CFL1	CHRNA3	CHRNA7	CHRNB2	COBL	CPEB3
GOBP_DENDRITE_EXTENSION	https://www.gsea-msigdb.org/gsea/msigdb/human/geneset/GOBP_DENDRITE_EXTENSION	AUTS2	BCL11A	CACNG7	CDKL3	CPNE5	CPNE6	CPNE9	CXCR4	CYFIP1	CYFIP2	ITSN2	LLPH	MECP2	MUL1	NEDD4L	OSTN	PLAA	PRKN	RASAL1	RIMS1	RIMS2	RNF157	SH3GL2	SLC23A2	SLC9A6	SMURF1	SPAG9	STK11	SYT1	SYT14P1	SYT17	SYT2	SYT3	SYT4	TMEM108	UNC13A	WASF1
GOBP_DENDRITE_MORPHOGENESIS	https://www.gsea-msigdb.org/gsea/msigdb/human/geneset/GOBP_DENDRITE_MORPHOGENESIS	ABI1	ABI2	ABI3	ABITRAM	ADGRB3	ANAPC2	ANKRD27	ARC	ARHGAP33	ARHGAP44	ARMCX5-GPRASP2	BAIAP2	BTBD3	CAMK2B	CAPRIN1	CAPRIN2	CDC42	CDK5	CDK5R1	CDKL3	CDKL5	CELSR2	CFL1	CHRNA3	CHRNA7	CHRNB2	CTNNA2	CTNND2	CUL7	CUX1	CUX2	DBN1	DCDC2	DCLK1	DHX36	DIP2A	DLG4	DNM3	DOCK10	DPYSL5	DSCAM	DTNBP1	DVL1	EEF2K	EFNA1	ELAVL4	EPHA4	EPHB1
GOBP_DENDRITE_SELF_AVOIDANCE	https://www.gsea-msigdb.org/gsea/msigdb/human/geneset/GOBP_DENDRITE_SELF_AVOIDANCE	CNTN2	CNTN4	CNTN6	DSCAM	DSCAML1	EMB	EXT1	IGSF9	MYPN	NEXN	PALLD	ROBO3	ROBO4	TNN
GOBP_DENDRITIC_CELL_ANTIGEN_PROCESSING_AND_PRESENTATION	https://www.gsea-msigdb.org/gsea/msigdb/human/geneset/GOBP_DENDRITIC_CELL_ANTIGEN_PROCESSING_AND_PRESENTATION	CCL19	CCL21	CCR7	CD68	CD74	CLEC4A	FCGR2B	FGL2	HLA-DRA	HLA-DRB1	HLA-DRB3	NOD1	NOD2	SLC11A1	THBS1
GOBP_DENDRITIC_CELL_APOPTOTIC_PROCESS	https://www.gsea-msigdb.org/gsea/msigdb/human/geneset/GOBP_DENDRITIC_CELL_APOPTOTIC_PROCESS	AXL	BCL2	BCL2L1	CCL19	CCL21	CCR7	CXCL12	GAS6	LGALS9	LILRB1	LYN	RAPGEF2
GOBP_DENDRITIC_CELL_CHEMOTAXIS	https://www.gsea-msigdb.org/gsea/msigdb/human/geneset/GOBP_DENDRITIC_CELL_CHEMOTAXIS	ARHGEF5	C1QBP	CALR	CCL19	CCL21	CCL5	CCR1	CCR2	CCR5	CCR6	CCR7	CXCR1	CXCR2	CXCR4	GAS6	GPR183	HMGB1	IL12A	LGALS9	PIK3CG	SLAMF1	SLAMF8	SPI1	TNFSF18	TRPM2	TRPM4
GOBP_DENDRITIC_CELL_CYTOKINE_PRODUCTION	https://www.gsea-msigdb.org/gsea/msigdb/human/geneset/GOBP_DENDRITIC_CELL_CYTOKINE_PRODUCTION	BST2	CAMK4	CLEC7A	DDX1	DDX21	DHX36	JAK3	KIT	MAVS	NOD2	PLCG2	RIGI	SCIMP	SLAMF9	TICAM1	TICAM2	TLR3	TLR4	TLR9
GOBP_DENDRITIC_CELL_DIFFERENTIATION	https://www.gsea-msigdb.org/gsea/msigdb/human/geneset/GOBP_DENDRITIC_CELL_DIFFERENTIATION	AGER	AXL	AZI2	BATF	BATF2	BATF3	CAMK4	CCL19	CCR7	CEBPB	CSF2	DCSTAMP	DHRS2	F2RL1	FCGR2B	FLT3	GAS6	GATA1	HLA-B	HLA-G	HMGB1	IL4	IRF4	IRF8	ITGB6	ITGB8	LGALS1	LGALS3	LGALS9	LILRB1	LILRB2	LTBR	LYN	MIR223	NOTCH2	PRTN3	PSEN1	RBPJ	RELB	SPI1	TGFBR2	TMEM176A	TMEM176B	TRAF6	TREM2	TRPM2	UBD	ZBTB46
GOBP_DENDRITIC_CELL_MIGRATION	https://www.gsea-msigdb.org/gsea/msigdb/human/geneset/GOBP_DENDRITIC_CELL_MIGRATION	ALOX5	ARHGEF5	ASB2	C1QBP	CALR	CCL19	CCL21	CCL5	CCR1	CCR2	CCR5	CCR6	CCR7	CDC42	CXCR1	CXCR2	CXCR4	DOCK8	EPS8	EXT1	GAS6	GPR183	HMGB1	IL12A	LGALS9	NLRP12	PIK3CG	SLAMF1	SLAMF8	SPI1	TNFSF18	TRPM2	TRPM4
GOBP_DENDRITIC_SPINE_DEVELOPMENT	https://www.gsea-msigdb.org/gsea/msigdb/human/geneset/GOBP_DENDRITIC_SPINE_DEVELOPMENT	ABI2	ABI3	APOE	ARC	ARF4	ARF6	ARHGAP33	ARHGAP44	ARMCX5-GPRASP2	ASAP1	BAIAP2	C21orf91	CAMK1	CAMK2A	CAMK2B	CAPRIN1	CAPRIN2	CDC42	CDK5	CDK5R1	CDKL5	CFL1	CPEB3	CTNND2	CUX2	DBN1	DHX36	DIP2A	DISC1	DLG4	DLG5	DNM3	DOCK10	DTNBP1	DVL1	EEF2K	EFNA1	EIF4G2	EPHA4	EPHB1	EPHB2	EPHB3	FMR1	FOXO6	FSTL4	GPRASP3	GRIN3A	HDAC2
GOBP_DENDRITIC_SPINE_MAINTENANCE	https://www.gsea-msigdb.org/gsea/msigdb/human/geneset/GOBP_DENDRITIC_SPINE_MAINTENANCE	ABHD17B	APOE	CTTN	FCGR2B	FYN	GRIN2B	HOMER1	IGF1R	INS	INSR	ITGA3	ITPKA	MIR30B	MTMR2	NEDD9	PICK1	PRNP	TANC1	TREM2	VPS35	ZMYND8	ZNF804A
GOBP_DENDRITIC_SPINE_MORPHOGENESIS	https://www.gsea-msigdb.org/gsea/msigdb/human/geneset/GOBP_DENDRITIC_SPINE_MORPHOGENESIS	ABI2	ABI3	ARC	ARHGAP33	ARHGAP44	ARMCX5-GPRASP2	BAIAP2	CAMK2B	CAPRIN1	CAPRIN2	CDC42	CDK5	CDK5R1	CFL1	CTNND2	CUX2	DBN1	DHX36	DIP2A	DLG4	DNM3	DOCK10	DTNBP1	DVL1	EEF2K	EFNA1	EPHA4	EPHB1	EPHB2	EPHB3	GPRASP3	HDAC6	ITPKA	KIF1A	LRP8	LRRK2	LZTS3	NGEF	NLGN1	PAFAH1B1	PAK3	PDLIM5	PPFIA2	PTEN	RELN	SHANK1	SHANK3	SIPA1L1
GOBP_DENDRITIC_TRANSPORT	https://www.gsea-msigdb.org/gsea/msigdb/human/geneset/GOBP_DENDRITIC_TRANSPORT	FLOT2	HNRNPU	KIF17	KIF3B	KIF5A	KIF5B	KIF5C	PURA	RABGEF1	STAU1	STAU2	TRAK2
GOBP_DENDRITIC_TRANSPORT_OF_RIBONUCLEOPROTEIN_COMPLEX	https://www.gsea-msigdb.org/gsea/msigdb/human/geneset/GOBP_DENDRITIC_TRANSPORT_OF_RIBONUCLEOPROTEIN_COMPLEX	HNRNPU	KIF5C	PURA	STAU1	STAU2
GOBP_DENSE_CORE_GRANULE_EXOCYTOSIS	https://www.gsea-msigdb.org/gsea/msigdb/human/geneset/GOBP_DENSE_CORE_GRANULE_EXOCYTOSIS	BAIAP3	CADPS	CADPS2	RAB3A	SNAP25	STXBP1	SYT4	UNC13A	UNC13B	UNC13C
GOBP_DENSE_CORE_GRANULE_LOCALIZATION	https://www.gsea-msigdb.org/gsea/msigdb/human/geneset/GOBP_DENSE_CORE_GRANULE_LOCALIZATION	KIF1A	KIF1C	KIF5A	KIF5B	MAP2	MECP2	PPFIA2	SYBU	SYT4	TANC2	TRIM46
GOBP_DENTATE_GYRUS_DEVELOPMENT	https://www.gsea-msigdb.org/gsea/msigdb/human/geneset/GOBP_DENTATE_GYRUS_DEVELOPMENT	ATAT1	BTG2	CDK6	DRD1	EMX2	FEZF2	FXR1	FXR2	LARGE1	LEF1	LMX1A	MDK	NEUROD1	NEUROD6	NR2E1	POMGNT1	POMT2	PROX1	PTEN	SCN2A	SMO	TMEM108	TUBA1A
GOBP_DENTINOGENESIS	https://www.gsea-msigdb.org/gsea/msigdb/human/geneset/GOBP_DENTINOGENESIS	DSPP	FAM20C	SERPINE1	SLC34A1	SMPD3	TCIRG1
GOBP_DEOXYRIBONUCLEOSIDE_CATABOLIC_PROCESS	https://www.gsea-msigdb.org/gsea/msigdb/human/geneset/GOBP_DEOXYRIBONUCLEOSIDE_CATABOLIC_PROCESS	ADA	DERA	DPYD	GDA	PNP	XDH
GOBP_DEOXYRIBONUCLEOSIDE_DIPHOSPHATE_METABOLIC_PROCESS	https://www.gsea-msigdb.org/gsea/msigdb/human/geneset/GOBP_DEOXYRIBONUCLEOSIDE_DIPHOSPHATE_METABOLIC_PROCESS	AK5	CMPK2	DTYMK	GUK1	NUDT18
GOBP_DEOXYRIBONUCLEOSIDE_METABOLIC_PROCESS	https://www.gsea-msigdb.org/gsea/msigdb/human/geneset/GOBP_DEOXYRIBONUCLEOSIDE_METABOLIC_PROCESS	ADA	DERA	DGUOK	DHFR2	DPYD	DTYMK	GDA	PNP	TK1	TK2	XDH
GOBP_DEOXYRIBONUCLEOSIDE_MONOPHOSPHATE_BIOSYNTHETIC_PROCESS	https://www.gsea-msigdb.org/gsea/msigdb/human/geneset/GOBP_DEOXYRIBONUCLEOSIDE_MONOPHOSPHATE_BIOSYNTHETIC_PROCESS	ADK	DCK	DGUOK	DUT	ENSG00000276759	SHMT1	TK1	TK2	TYMS
GOBP_DEOXYRIBONUCLEOSIDE_MONOPHOSPHATE_CATABOLIC_PROCESS	https://www.gsea-msigdb.org/gsea/msigdb/human/geneset/GOBP_DEOXYRIBONUCLEOSIDE_MONOPHOSPHATE_CATABOLIC_PROCESS	ADA	DNPH1	DPYD	DPYS	GDA	NT5C	NT5C1A	NT5M	PNP	TYMP	UPB1	UPP1	UPP2	XDH
GOBP_DEOXYRIBONUCLEOSIDE_MONOPHOSPHATE_METABOLIC_PROCESS	https://www.gsea-msigdb.org/gsea/msigdb/human/geneset/GOBP_DEOXYRIBONUCLEOSIDE_MONOPHOSPHATE_METABOLIC_PROCESS	ADA	ADK	DCK	DGUOK	DNPH1	DPYD	DPYS	DUT	ENSG00000276759	GDA	NT5C	NT5C1A	NT5C2	NT5M	PNP	SHMT1	TK1	TK2	TYMP	TYMS	UPB1	UPP1	UPP2	XDH
GOBP_DEOXYRIBONUCLEOSIDE_TRIPHOSPHATE_METABOLIC_PROCESS	https://www.gsea-msigdb.org/gsea/msigdb/human/geneset/GOBP_DEOXYRIBONUCLEOSIDE_TRIPHOSPHATE_METABOLIC_PROCESS	ADA	ADK	DGUOK	ITPA	NUDT15	NUDT16	RRM2B	SAMHD1
GOBP_DEOXYRIBONUCLEOTIDE_BIOSYNTHETIC_PROCESS	https://www.gsea-msigdb.org/gsea/msigdb/human/geneset/GOBP_DEOXYRIBONUCLEOTIDE_BIOSYNTHETIC_PROCESS	ADK	AK5	CMPK2	DCK	DGUOK	DTYMK	DUT	ENSG00000276759	GUK1	RRM1	RRM2	RRM2B	SHMT1	TBPL1	TYMS
GOBP_DEOXYRIBONUCLEOTIDE_CATABOLIC_PROCESS	https://www.gsea-msigdb.org/gsea/msigdb/human/geneset/GOBP_DEOXYRIBONUCLEOTIDE_CATABOLIC_PROCESS	ADA	DCTPP1	DERA	DPYD	DPYS	DUT	ENSG00000276759	GDA	MBD4	NEIL1	NEIL2	NT5C	NT5C1A	NT5M	NTHL1	NUDT15	NUDT16	NUDT18	OGG1	PNP	SAMHD1	SMUG1	TDG	TYMP	UNG	UPB1	UPP1	UPP2	XDH
GOBP_DEOXYRIBONUCLEOTIDE_METABOLIC_PROCESS	https://www.gsea-msigdb.org/gsea/msigdb/human/geneset/GOBP_DEOXYRIBONUCLEOTIDE_METABOLIC_PROCESS	ADA	ADK	AK5	CMPK2	DCK	DCTPP1	DERA	DGUOK	DPYD	DPYS	DTYMK	DUT	ENSG00000276759	GDA	GUK1	MBD4	NEIL1	NEIL2	NT5C	NT5C1A	NT5C2	NT5M	NTHL1	NUDT15	NUDT16	NUDT18	OGG1	PNP	RRM1	RRM2	RRM2B	SAMHD1	SHMT1	SMUG1	TBPL1	TDG	TYMP	TYMS	UNG	UPB1	UPP1	UPP2	XDH
GOBP_DEPHOSPHORYLATION	https://www.gsea-msigdb.org/gsea/msigdb/human/geneset/GOBP_DEPHOSPHORYLATION	ACP2	ACP3	ACP4	ACP5	ACP6	ADORA1	AGTR2	ALPG	ALPI	ALPL	ALPP	AMBRA1	ANKLE2	ARPP19	BGLAP	BMP2	BOD1	BTRC	CALM1	CALM2	CALM3	CAMTA1	CD300A	CD33	CDC14A	CDC14B	CDC14C	CDCA2	CDH5	CDK5RAP3	CDKN3	CHP1	CHP2	CHRM5	CNEP1R1	CRY2	CTDNEP1	CTDP1	CTDSP1	CTDSP2	CTTNBP2NL	DAPP1	DLC1	DNAJC6	DUSP1	DUSP10	DUSP11	DUSP12
GOBP_DEPYRIMIDINATION	https://www.gsea-msigdb.org/gsea/msigdb/human/geneset/GOBP_DEPYRIMIDINATION	MBD4	NEIL1	NEIL2	NTHL1	OGG1	SMUG1	TDG	UNG
GOBP_DERMATAN_SULFATE_BIOSYNTHETIC_PROCESS	https://www.gsea-msigdb.org/gsea/msigdb/human/geneset/GOBP_DERMATAN_SULFATE_BIOSYNTHETIC_PROCESS	CHST12	CHST14	DSE	DSEL	UST
GOBP_DERMATAN_SULFATE_METABOLIC_PROCESS	https://www.gsea-msigdb.org/gsea/msigdb/human/geneset/GOBP_DERMATAN_SULFATE_METABOLIC_PROCESS	CHST12	CHST14	DSE	DSEL	HEXA	HEXB	IDS	IDUA	UST
GOBP_DERMATAN_SULFATE_PROTEOGLYCAN_BIOSYNTHETIC_PROCESS	https://www.gsea-msigdb.org/gsea/msigdb/human/geneset/GOBP_DERMATAN_SULFATE_PROTEOGLYCAN_BIOSYNTHETIC_PROCESS	B3GAT3	CHST12	CHST14	CSGALNACT1	CSGALNACT2	DSE	DSEL	UST
GOBP_DERMATAN_SULFATE_PROTEOGLYCAN_METABOLIC_PROCESS	https://www.gsea-msigdb.org/gsea/msigdb/human/geneset/GOBP_DERMATAN_SULFATE_PROTEOGLYCAN_METABOLIC_PROCESS	B3GAT3	CHST12	CHST14	CSGALNACT1	CSGALNACT2	DSE	DSEL	HEXA	HEXB	IDS	IDUA	UST
GOBP_DESMOSOME_ORGANIZATION	https://www.gsea-msigdb.org/gsea/msigdb/human/geneset/GOBP_DESMOSOME_ORGANIZATION	DSG2	DSP	GRHL1	JUP	NECTIN1	PERP	PKP2	PKP3	PRKCA	SNAI2
GOBP_DETECTION_OF_ABIOTIC_STIMULUS	https://www.gsea-msigdb.org/gsea/msigdb/human/geneset/GOBP_DETECTION_OF_ABIOTIC_STIMULUS	ABCA4	ADGRV1	ADORA1	AIPL1	ANO1	ANO3	ASIC2	ASIC3	ATP8A2	BACE1	BEST1	CABP4	CACNA1F	CACNA2D4	CACNB4	CALCA	CAMKMT	CAV3	CCDC66	CDH2	CDS1	CEP250	CHRNA10	CHRNA9	CNGB1	COL11A1	CRB1	CSRP3	CTNNB1	CXCL12	CXCR4	DRGX	ELOVL4	ENSG00000290147	EPHB1	EYS	FECH	FYN	GJA10	GNA11	GNAQ	GNAT1	GNAT2	GNGT1	GNGT2	GPR52	GPR88	GRIK2
GOBP_DETECTION_OF_BACTERIUM	https://www.gsea-msigdb.org/gsea/msigdb/human/geneset/GOBP_DETECTION_OF_BACTERIUM	CD1D	HLA-A	HLA-B	HLA-DRB1	NAIP	NLRC4	NOD1	NOD2	PGLYRP1	PGLYRP2	PGLYRP3	PGLYRP4	SSC5D	TLR1	TLR2	TLR6
GOBP_DETECTION_OF_BIOTIC_STIMULUS	https://www.gsea-msigdb.org/gsea/msigdb/human/geneset/GOBP_DETECTION_OF_BIOTIC_STIMULUS	ATF2	C4B	CD1D	CDHR2	CLEC6A	CLEC7A	CRTAM	DACH1	FAP	HLA-A	HLA-B	HLA-DRB1	LBP	LY96	NAIP	NLRC4	NLRP3	NOD1	NOD2	NR4A1	PAK1	PGLYRP1	PGLYRP2	PGLYRP3	PGLYRP4	PTPRJ	SCARB1	SMO	SRPX	SSC5D	TLR1	TLR2	TLR4	TLR6	TLR9	TREM2	TSPO	YAP1
GOBP_DETECTION_OF_CALCIUM_ION	https://www.gsea-msigdb.org/gsea/msigdb/human/geneset/GOBP_DETECTION_OF_CALCIUM_ION	CALM1	CALM2	CALM3	CASQ2	CASR	KCNIP2	KCNMB1	KCNMB2	KCNMB3	KCNMB4	RYR2	STIM1	SYT1
GOBP_DETECTION_OF_CELL_DENSITY	https://www.gsea-msigdb.org/gsea/msigdb/human/geneset/GOBP_DETECTION_OF_CELL_DENSITY	ATF2	CDHR2	DACH1	FAP	PAK1	PTPRJ	SMO	SRPX	TSPO	YAP1
GOBP_DETECTION_OF_CHEMICAL_STIMULUS_INVOLVED_IN_SENSORY_PERCEPTION_OF_TASTE	https://www.gsea-msigdb.org/gsea/msigdb/human/geneset/GOBP_DETECTION_OF_CHEMICAL_STIMULUS_INVOLVED_IN_SENSORY_PERCEPTION_OF_TASTE	AZGP1	CA6	CST1	CST2	CST4	FFAR4	GNAT1	GNAT2	GNAT3	LPO	PIGR	PIP	PKD1L3	PKD2L1	PLCB2	RTP1	RTP2	RTP3	RTP4	RTP5	TAS1R1	TAS1R2	TAS1R3	TAS2R1	TAS2R10	TAS2R13	TAS2R14	TAS2R16	TAS2R19	TAS2R20	TAS2R3	TAS2R30	TAS2R31	TAS2R38	TAS2R39	TAS2R4	TAS2R40	TAS2R41	TAS2R42	TAS2R43	TAS2R45	TAS2R46	TAS2R5	TAS2R50	TAS2R60	TAS2R7	TAS2R8	TAS2R9
GOBP_DETECTION_OF_EXTERNAL_BIOTIC_STIMULUS	https://www.gsea-msigdb.org/gsea/msigdb/human/geneset/GOBP_DETECTION_OF_EXTERNAL_BIOTIC_STIMULUS	C4B	CD1D	CLEC6A	CLEC7A	HLA-A	HLA-B	HLA-DRB1	LBP	LY96	NAIP	NLRC4	NOD1	NOD2	NR4A1	PGLYRP1	PGLYRP2	PGLYRP3	PGLYRP4	SCARB1	SSC5D	TLR1	TLR2	TLR4	TLR6	TLR9	TREM2
GOBP_DETECTION_OF_LIGHT_STIMULUS	https://www.gsea-msigdb.org/gsea/msigdb/human/geneset/GOBP_DETECTION_OF_LIGHT_STIMULUS	ABCA4	AIPL1	ASIC2	ATP8A2	BEST1	CABP4	CACNA1F	CACNA2D4	CACNB4	CAMKMT	CCDC66	CDS1	CEP250	CNGB1	CRB1	ELOVL4	ENSG00000290147	EYS	FECH	GJA10	GNA11	GNAQ	GNAT1	GNAT2	GNGT1	GNGT2	GPR52	GPR88	GRK1	GRK4	GRK7	GRM6	GUCA1A	GUCY2D	GUCY2F	NMT1	NMT2	NR2E3	OPN1LW	OPN1MW	OPN1MW2	OPN1MW3	OPN1SW	OPN3	OPN4	OPN5	PDC	PDE6B
GOBP_DETECTION_OF_LIGHT_STIMULUS_INVOLVED_IN_SENSORY_PERCEPTION	https://www.gsea-msigdb.org/gsea/msigdb/human/geneset/GOBP_DETECTION_OF_LIGHT_STIMULUS_INVOLVED_IN_SENSORY_PERCEPTION	ATP8A2	BEST1	CACNA1F	CACNA2D4	CACNB4	CCDC66	CEP250	CNGB1	CRB1	EYS	GJA10	GNAT1	GNAT2	GRM6	GUCY2F	PRPH2	REEP6	RGS9BP	ROM1	RPE65	SEMA5B	TULP1
GOBP_DETECTION_OF_LIPOPOLYSACCHARIDE	https://www.gsea-msigdb.org/gsea/msigdb/human/geneset/GOBP_DETECTION_OF_LIPOPOLYSACCHARIDE	LY96	NR4A1	SCARB1	TLR4	TREM2
GOBP_DETECTION_OF_MECHANICAL_STIMULUS	https://www.gsea-msigdb.org/gsea/msigdb/human/geneset/GOBP_DETECTION_OF_MECHANICAL_STIMULUS	ADGRV1	ANO3	ASIC2	ASIC3	BACE1	CAV3	CDH2	CHRNA10	CHRNA9	COL11A1	CSRP3	CTNNB1	CXCL12	CXCR4	FYN	HPN	HTR2A	ITGA2	JUP	KCNA1	KCNK4	KCNQ1	KIT	LHFPL5	MKKS	NTRK1	PDZD7	PHF24	PIEZO1	PIEZO2	PJVK	PKD1	PKD1L1	PKD1L2	PKD1L3	PKD2	PKD2L1	PKD2L2	PKDREJ	PTK2	SCN11A	SCN1A	SCN9A	SERPINE2	STRC	TCAP	TMC1	TMC2
GOBP_DETECTION_OF_MECHANICAL_STIMULUS_INVOLVED_IN_SENSORY_PERCEPTION	https://www.gsea-msigdb.org/gsea/msigdb/human/geneset/GOBP_DETECTION_OF_MECHANICAL_STIMULUS_INVOLVED_IN_SENSORY_PERCEPTION	ADGRV1	ASIC2	ASIC3	BACE1	CHRNA10	CHRNA9	COL11A1	CXCL12	CXCR4	FYN	HPN	HTR2A	ITGA2	KCNA1	KCNK4	KCNQ1	KIT	LHFPL5	MKKS	NTRK1	PDZD7	PHF24	PIEZO2	PJVK	SCN11A	SCN1A	SCN9A	SERPINE2	STRC	TMC1	TMC2	TMEM120A	TNF	TRPA1	WHRN
GOBP_DETECTION_OF_MECHANICAL_STIMULUS_INVOLVED_IN_SENSORY_PERCEPTION_OF_PAIN	https://www.gsea-msigdb.org/gsea/msigdb/human/geneset/GOBP_DETECTION_OF_MECHANICAL_STIMULUS_INVOLVED_IN_SENSORY_PERCEPTION_OF_PAIN	ASIC3	BACE1	CXCL12	CXCR4	FYN	HTR2A	ITGA2	KCNA1	NTRK1	PHF24	SCN11A	SCN1A	TMEM120A	TNF	TRPA1
GOBP_DETECTION_OF_MECHANICAL_STIMULUS_INVOLVED_IN_SENSORY_PERCEPTION_OF_SOUND	https://www.gsea-msigdb.org/gsea/msigdb/human/geneset/GOBP_DETECTION_OF_MECHANICAL_STIMULUS_INVOLVED_IN_SENSORY_PERCEPTION_OF_SOUND	ADGRV1	CHRNA10	CHRNA9	COL11A1	HPN	KCNQ1	KIT	LHFPL5	MKKS	PDZD7	PJVK	STRC	TMC1	TMC2	WHRN
GOBP_DETECTION_OF_MOLECULE_OF_BACTERIAL_ORIGIN	https://www.gsea-msigdb.org/gsea/msigdb/human/geneset/GOBP_DETECTION_OF_MOLECULE_OF_BACTERIAL_ORIGIN	C4B	LBP	LY96	NOD2	NR4A1	SCARB1	SSC5D	TLR1	TLR2	TLR4	TLR6	TLR9	TREM2
GOBP_DETECTION_OF_MUSCLE_STRETCH	https://www.gsea-msigdb.org/gsea/msigdb/human/geneset/GOBP_DETECTION_OF_MUSCLE_STRETCH	CAV3	CDH2	CSRP3	CTNNB1	PTK2	TCAP	TTN
GOBP_DETECTION_OF_OTHER_ORGANISM	https://www.gsea-msigdb.org/gsea/msigdb/human/geneset/GOBP_DETECTION_OF_OTHER_ORGANISM	CD1D	CLEC6A	CLEC7A	HLA-A	HLA-B	HLA-DRB1	NAIP	NLRC4	NOD1	NOD2	PGLYRP1	PGLYRP2	PGLYRP3	PGLYRP4	SSC5D	TLR1	TLR2	TLR4	TLR6
GOBP_DETECTION_OF_STIMULUS	https://www.gsea-msigdb.org/gsea/msigdb/human/geneset/GOBP_DETECTION_OF_STIMULUS	ABCA4	ADGRV1	ADORA1	AIPL1	ANO1	ANO3	ASIC2	ASIC3	ATF2	ATP8A2	AZGP1	BACE1	BEST1	C4B	CA6	CABP4	CACNA1F	CACNA2D4	CACNB4	CADM1	CALCA	CALM1	CALM2	CALM3	CAMKMT	CASQ2	CASR	CAV3	CCDC66	CD1D	CDH2	CDHR2	CDS1	CEP250	CHRNA10	CHRNA9	CLEC6A	CLEC7A	CNGB1	COL11A1	CRB1	CRTAM	CSRP3	CST1	CST2	CST4	CTNNB1	CXCL12
GOBP_DETECTION_OF_STIMULUS_INVOLVED_IN_SENSORY_PERCEPTION	https://www.gsea-msigdb.org/gsea/msigdb/human/geneset/GOBP_DETECTION_OF_STIMULUS_INVOLVED_IN_SENSORY_PERCEPTION	ADGRV1	ADORA1	ANO1	ASIC2	ASIC3	ATP8A2	AZGP1	BACE1	BEST1	CA6	CACNA1F	CACNA2D4	CACNB4	CALCA	CCDC66	CEP250	CHRNA10	CHRNA9	CNGB1	COL11A1	CRB1	CST1	CST2	CST4	CXCL12	CXCR4	EPHB1	EYS	FFAR4	FYN	GJA10	GNAT1	GNAT2	GNAT3	GPR148	GRIK2	GRM6	GUCY2F	HPN	HTR2A	ITGA2	KCNA1	KCNK4	KCNQ1	KIT	LHFPL5	LPO	LXN
GOBP_DETECTION_OF_STIMULUS_INVOLVED_IN_SENSORY_PERCEPTION_OF_PAIN	https://www.gsea-msigdb.org/gsea/msigdb/human/geneset/GOBP_DETECTION_OF_STIMULUS_INVOLVED_IN_SENSORY_PERCEPTION_OF_PAIN	ADORA1	ANO1	ASIC3	BACE1	CALCA	CXCL12	CXCR4	EPHB1	FYN	HTR2A	ITGA2	KCNA1	LXN	MMP24	NR2F6	NTRK1	NTSR1	PHF24	PRDM12	SCN11A	SCN1A	SCN9A	TMEM120A	TNF	TRPA1	TRPV1
GOBP_DETECTION_OF_TEMPERATURE_STIMULUS	https://www.gsea-msigdb.org/gsea/msigdb/human/geneset/GOBP_DETECTION_OF_TEMPERATURE_STIMULUS	ADORA1	ANO1	ANO3	ASIC3	CALCA	CXCL12	CXCR4	DRGX	EPHB1	GRIK2	HTR2A	LXN	MMP24	NGFR	NR2F6	NTRK1	NTSR1	OPN4	PRDM12	RHO	SCN11A	SCN9A	TRPV1	WDR47
GOBP_DETECTION_OF_TEMPERATURE_STIMULUS_INVOLVED_IN_SENSORY_PERCEPTION_OF_PAIN	https://www.gsea-msigdb.org/gsea/msigdb/human/geneset/GOBP_DETECTION_OF_TEMPERATURE_STIMULUS_INVOLVED_IN_SENSORY_PERCEPTION_OF_PAIN	ADORA1	ANO1	ASIC3	CALCA	CXCL12	CXCR4	EPHB1	HTR2A	LXN	MMP24	NR2F6	NTRK1	NTSR1	PRDM12	SCN11A	SCN9A	TRPV1
GOBP_DETECTION_OF_TEMPERATURE_STIMULUS_INVOLVED_IN_THERMOCEPTION	https://www.gsea-msigdb.org/gsea/msigdb/human/geneset/GOBP_DETECTION_OF_TEMPERATURE_STIMULUS_INVOLVED_IN_THERMOCEPTION	GRIK2	OPN4	RHO	TRPV1	WDR47
GOBP_DETECTION_OF_VIRUS	https://www.gsea-msigdb.org/gsea/msigdb/human/geneset/GOBP_DETECTION_OF_VIRUS	IFIH1	RIGI	SERINC3	SERINC5	TLR3	ZCCHC3
GOBP_DETECTION_OF_VISIBLE_LIGHT	https://www.gsea-msigdb.org/gsea/msigdb/human/geneset/GOBP_DETECTION_OF_VISIBLE_LIGHT	ABCA4	AIPL1	ATP8A2	BEST1	CACNA1F	CACNA2D4	CACNB4	CAMKMT	CCDC66	CEP250	CNGB1	CRB1	ELOVL4	EYS	GJA10	GNA11	GNAQ	GNAT1	GNAT2	GPR52	GPR88	GRK1	GRK4	GRK7	GRM6	GUCY2D	GUCY2F	NMT1	NMT2	OPN1LW	OPN1MW	OPN1MW2	OPN1MW3	OPN1SW	OPN3	OPN4	OPN5	PDE6B	PDE6C	PRPH2	RDH11	REEP6	RGR	RGS9BP	RHO	ROM1	RP1	RPE65
GOBP_DETERMINATION_OF_ADULT_LIFESPAN	https://www.gsea-msigdb.org/gsea/msigdb/human/geneset/GOBP_DETERMINATION_OF_ADULT_LIFESPAN	ATM	ATN1	ATP8A2	B4GALNT1	CGAS	COQ7	ERCC1	ERCC2	GBA1	GHRHR	INPP5D	KCNJ11	KCNJ8	KL	LARGE1	LEP	LIPA	LRRK2	MSH2	MSH6	NAGLU	PRDM2	RAD54B	RAD54L	SCN1A	SCN2A	SGSH	SIRT6	SOD1	TFCP2L1	TP53	TP63	TREX1	WRN	ZMPSTE24
GOBP_DETERMINATION_OF_DIGESTIVE_TRACT_LEFT_RIGHT_ASYMMETRY	https://www.gsea-msigdb.org/gsea/msigdb/human/geneset/GOBP_DETERMINATION_OF_DIGESTIVE_TRACT_LEFT_RIGHT_ASYMMETRY	CCDC103	CCDC39	CCDC40	DNAAF1	MEGF8	NPHP3	ZIC3
GOBP_DETERMINATION_OF_DORSAL_VENTRAL_ASYMMETRY	https://www.gsea-msigdb.org/gsea/msigdb/human/geneset/GOBP_DETERMINATION_OF_DORSAL_VENTRAL_ASYMMETRY	ACVR1	AIDA	CER1	CTNNB1	DDIT3	GREM1	GREM2	MICOS10-NBL1	NBL1	SOSTDC1	WNT8B
GOBP_DETERMINATION_OF_LEFT_RIGHT_ASYMMETRY_IN_LATERAL_MESODERM	https://www.gsea-msigdb.org/gsea/msigdb/human/geneset/GOBP_DETERMINATION_OF_LEFT_RIGHT_ASYMMETRY_IN_LATERAL_MESODERM	CER1	CITED2	DAND5	FOXH1	NODAL	SHH	SMAD2	SMO
GOBP_DETERMINATION_OF_LIVER_LEFT_RIGHT_ASYMMETRY	https://www.gsea-msigdb.org/gsea/msigdb/human/geneset/GOBP_DETERMINATION_OF_LIVER_LEFT_RIGHT_ASYMMETRY	CCDC39	CCDC40	DNAAF1	NPHP3	PKD2	ZIC3
GOBP_DETERMINATION_OF_PANCREATIC_LEFT_RIGHT_ASYMMETRY	https://www.gsea-msigdb.org/gsea/msigdb/human/geneset/GOBP_DETERMINATION_OF_PANCREATIC_LEFT_RIGHT_ASYMMETRY	CCDC39	CCDC40	DNAAF1	NPHP3	ZIC3
GOBP_DETOXIFICATION	https://www.gsea-msigdb.org/gsea/msigdb/human/geneset/GOBP_DETOXIFICATION	ABCB1	ABCB6	ABCG2	ADH4	ADH5	AIFM2	AKR1A1	AKR1B10	ALB	ALDH1A1	ALOX5AP	APOA4	APOE	APOM	AQP8	ATP7A	ATP7B	BMP7	CAT	CCS	CD36	CLIC2	CYGB	DHFR	DHFRP1	DUOX1	DUOX2	EPX	ESD	FABP1	FANCC	FBLN5	GCH1	GPX1	GPX2	GPX3	GPX4	GPX5	GPX6	GPX7	GPX8	GSR	GSTA1	GSTK1	GSTM1	GSTM2	GSTM3	GSTO1
GOBP_DETOXIFICATION_OF_COPPER_ION	https://www.gsea-msigdb.org/gsea/msigdb/human/geneset/GOBP_DETOXIFICATION_OF_COPPER_ION	ATP7A	MT1A	MT1B	MT1DP	MT1E	MT1F	MT1G	MT1H	MT1HL1	MT1M	MT1X	MT2A	MT3	MT4	MUC2	PARK7
GOBP_DETOXIFICATION_OF_INORGANIC_COMPOUND	https://www.gsea-msigdb.org/gsea/msigdb/human/geneset/GOBP_DETOXIFICATION_OF_INORGANIC_COMPOUND	ABCB6	ATP7A	CAT	MT1A	MT1B	MT1DP	MT1E	MT1F	MT1G	MT1H	MT1HL1	MT1M	MT1X	MT2A	MT3	MT4	MUC2	PARK7	SLC11A1	SLC30A1	SLC39A8	TXN
GOBP_DETOXIFICATION_OF_NITROGEN_COMPOUND	https://www.gsea-msigdb.org/gsea/msigdb/human/geneset/GOBP_DETOXIFICATION_OF_NITROGEN_COMPOUND	GSTM1	GSTM2	GSTM3	MTARC1	MTARC2
GOBP_DEVELOPMENTAL_CELL_GROWTH	https://www.gsea-msigdb.org/gsea/msigdb/human/geneset/GOBP_DEVELOPMENTAL_CELL_GROWTH	ABL1	ADCY10	ADNP	ADRA1A	AKAP6	ALCAM	ANAPC2	APOE	APP	ARHGAP4	ARIH2	AURKA	AUTS2	BARHL2	BCL11A	BDNF	BMPR2	C9orf72	CACNG7	CAV3	CDH1	CDH4	CDK5	CDKL3	CDKL5	COBL	CPNE1	CPNE5	CPNE6	CPNE9	CRABP2	CTDP1	CTNNB1	CTTN	CXCL12	CXCR4	CYFIP1	CYFIP2	DCAF13	DCC	DCLK1	DDR1	DIP2B	DISC1	DNM2	DRAXIN	DSCAM	DVL1
GOBP_DEVELOPMENTAL_GROWTH	https://www.gsea-msigdb.org/gsea/msigdb/human/geneset/GOBP_DEVELOPMENTAL_GROWTH	ABL1	ACACB	ACTN3	ACVR1C	ACVR2B	ADAM15	ADARB1	ADCY10	ADM	ADNP	ADPRHL1	ADRA1A	ADRB1	ADRB2	ADRB3	AFG3L2	AGR2	AGRN	AKAP6	AKIRIN1	AKT1	ALCAM	ALKBH1	AMH	ANAPC2	ANXA1	ANXA6	APBA1	APBA2	APOA5	APOD	APOE	APP	AR	AREG	ARHGAP4	ARID2	ARID5B	ARIH2	ARX	ASPM	ATF2	ATF5	ATM	ATN1	ATP8A2	ATRN	ATRX
GOBP_DEVELOPMENTAL_GROWTH_INVOLVED_IN_MORPHOGENESIS	https://www.gsea-msigdb.org/gsea/msigdb/human/geneset/GOBP_DEVELOPMENTAL_GROWTH_INVOLVED_IN_MORPHOGENESIS	ABL1	ADCY10	ADNP	ADPRHL1	ALCAM	ANAPC2	APOE	APP	AREG	ARHGAP4	AURKA	AUTS2	BARHL2	BCL11A	BDNF	BIN3	BMP4	BMPR2	C9orf72	CACNG7	CDH1	CDH4	CDK5	CDKL3	CDKL5	COBL	CPNE1	CPNE5	CPNE6	CPNE9	CRABP2	CSF1	CTNNB1	CTTN	CXCL12	CXCR4	CYFIP1	CYFIP2	DCC	DCLK1	DDR1	DIP2B	DISC1	DNM2	DRAXIN	DSCAM	DVL1	EDN1
GOBP_DEVELOPMENTAL_INDUCTION	https://www.gsea-msigdb.org/gsea/msigdb/human/geneset/GOBP_DEVELOPMENTAL_INDUCTION	AR	BMP2	BMP4	C12orf43	CTNNB1	DKK1	FGF1	FGF10	FGF2	FGF8	FRS2	FZD5	GATA5	GDNF	HIPK1	HIPK2	HOXA11	HOXC11	MESP1	NKX2-1	ROBO1	ROBO2	SALL1	SIX1	SOX8	SOX9	SPRY1	WNT1	WNT11	WNT2	WNT2B	WNT3	WNT4	WNT5A
GOBP_DEVELOPMENTAL_MATURATION	https://www.gsea-msigdb.org/gsea/msigdb/human/geneset/GOBP_DEVELOPMENTAL_MATURATION	ABHD2	ACTL6B	ACTN3	ACVRL1	ADAMTS12	ADAMTS7	ADGRB3	ADGRL1	AGRN	AKR1B1	ALDH1A2	ANAPC2	ANG	ANGPTL8	ANKRD17	ANKRD27	ANKS1A	AP1G1	AP1M1	AP3D1	APP	ARCN1	ARHGEF15	ASCL1	ATP6AP1	ATP6AP2	ATP6V0A1	ATP6V0A4	ATP6V0D1	ATP6V1A	ATP6V1B1	ATP6V1B2	ATP6V1C1	ATP6V1D	ATP6V1E1	ATP6V1F	ATP6V1G1	ATP6V1G2	ATP6V1H	AURKA	AXL	B4GALT5	B4GALT6	BAIAP3	BAP1	BCAN	BCL11A	BCL2
GOBP_DEVELOPMENTAL_PIGMENTATION	https://www.gsea-msigdb.org/gsea/msigdb/human/geneset/GOBP_DEVELOPMENTAL_PIGMENTATION	ADAMTS20	ADAMTS9	ADAMTSL4	ANKRD27	AP1G1	AP1M1	AP3D1	ATP6AP2	BAX	BCL2	BCL2L11	BLOC1S3	BLOC1S5	BLOC1S6	CD63	CITED1	DCT	EDN3	EDNRA	EDNRB	ENPP1	GLI3	GNA11	GPR143	HPS4	HPS5	IHH	KIT	KITLG	LRMDA	MEF2C	MITF	MREG	OCA2	OR51E2	RAB27A	RAB32	RAB38	SLC24A5	SLC45A2	SOD2	SOX10	SPNS2	TPCN2	TYR	TYRP1	USP13	VHL
GOBP_DEVELOPMENTAL_PROCESS_INVOLVED_IN_REPRODUCTION	https://www.gsea-msigdb.org/gsea/msigdb/human/geneset/GOBP_DEVELOPMENTAL_PROCESS_INVOLVED_IN_REPRODUCTION	A2M	ABHD2	ACE	ACOX1	ACRBP	ACRV1	ACSBG2	ACTL7A	ACTL9	ACVR1	ACVR2A	ADAD1	ADAD2	ADAM15	ADAM18	ADAM2	ADAM20	ADAM21	ADAM28	ADAM29	ADAM30	ADAM32	ADAMTS1	ADAMTS2	ADCY10	ADCYAP1R1	ADGB	ADGRG1	ADGRG2	ADIG	AFF4	AFP	AGFG1	AGO4	AKAP4	AKR1C3	AKT1	ALKBH5	ALOX15B	ALPL	AMH	AMHR2	ANG	ANGPT2	ANKRD49	ANXA1	AP3B1	APOB
GOBP_DEVELOPMENT_OF_PRIMARY_FEMALE_SEXUAL_CHARACTERISTICS	https://www.gsea-msigdb.org/gsea/msigdb/human/geneset/GOBP_DEVELOPMENT_OF_PRIMARY_FEMALE_SEXUAL_CHARACTERISTICS	A2M	ADAMTS1	ADCYAP1R1	AFP	AMH	AMHR2	ANG	ARID5B	ATM	BAX	BCL2	BCL2L1	BMPR1B	BRCA2	CASP2	CASP3	CCDC182	CEBPB	CGA	CSMD1	CTNNA1	CYP19A1	DACH1	DACH2	DMC1	DMRTA1	EIF2B2	EIF2B4	EIF2B5	EREG	ESR1	FANCA	FANCG	FOXC1	FOXL2	FSHB	FSHR	FST	FZD4	GAS2	GDF9	GNRH1	GPR149	HYAL3	IDH1	IMMP2L	INHA	INHBA
GOBP_DEVELOPMENT_OF_PRIMARY_SEXUAL_CHARACTERISTICS	https://www.gsea-msigdb.org/gsea/msigdb/human/geneset/GOBP_DEVELOPMENT_OF_PRIMARY_SEXUAL_CHARACTERISTICS	A2M	ACE	ACVR2A	ADAM15	ADAM18	ADAM2	ADAM20	ADAM21	ADAM29	ADAM30	ADAM32	ADAMTS1	ADCYAP1R1	ADGRG1	AFP	AGO4	AKR1C3	AMH	AMHR2	ANG	AR	ARID4A	ARID4B	ARID5B	ASPM	ATM	ATN1	ATRX	BASP1	BAX	BCL2	BCL2L1	BCL2L11	BCL2L2	BIK	BMPR1B	BOK	BRCA2	BRIP1	CASP2	CASP3	CBL	CBX2	CCDC182	CEBPB	CGA	CITED2	CRKL
GOBP_DEVELOPMENT_OF_SECONDARY_FEMALE_SEXUAL_CHARACTERISTICS	https://www.gsea-msigdb.org/gsea/msigdb/human/geneset/GOBP_DEVELOPMENT_OF_SECONDARY_FEMALE_SEXUAL_CHARACTERISTICS	AREG	IRF2BPL	MED1	PHB2	STAT5B	WNT5A
GOBP_DEVELOPMENT_OF_SECONDARY_SEXUAL_CHARACTERISTICS	https://www.gsea-msigdb.org/gsea/msigdb/human/geneset/GOBP_DEVELOPMENT_OF_SECONDARY_SEXUAL_CHARACTERISTICS	AREG	B4GALT1	BAX	IRF2BPL	LHCGR	MED1	PHB2	STAT5B	WNT5A
GOBP_DE_NOVO_AMP_BIOSYNTHETIC_PROCESS	https://www.gsea-msigdb.org/gsea/msigdb/human/geneset/GOBP_DE_NOVO_AMP_BIOSYNTHETIC_PROCESS	ADSL	ADSS1	ADSS2	ATIC	GART	PAICS	PFAS	PPAT
GOBP_DE_NOVO_CENTRIOLE_ASSEMBLY	https://www.gsea-msigdb.org/gsea/msigdb/human/geneset/GOBP_DE_NOVO_CENTRIOLE_ASSEMBLY	CCDC78	CDC20B	CEP152	CEP63	DEUP1	PLK4
GOBP_DE_NOVO_CENTRIOLE_ASSEMBLY_INVOLVED_IN_MULTI_CILIATED_EPITHELIAL_CELL_DIFFERENTIATION	https://www.gsea-msigdb.org/gsea/msigdb/human/geneset/GOBP_DE_NOVO_CENTRIOLE_ASSEMBLY_INVOLVED_IN_MULTI_CILIATED_EPITHELIAL_CELL_DIFFERENTIATION	CCDC78	CEP152	CEP63	DEUP1	PLK4
GOBP_DE_NOVO_NAD_BIOSYNTHETIC_PROCESS	https://www.gsea-msigdb.org/gsea/msigdb/human/geneset/GOBP_DE_NOVO_NAD_BIOSYNTHETIC_PROCESS	ACMSD	AFMID	HAAO	IDO1	IDO2	KMO	KYNU	NADSYN1
GOBP_DE_NOVO_PROTEIN_FOLDING	https://www.gsea-msigdb.org/gsea/msigdb/human/geneset/GOBP_DE_NOVO_PROTEIN_FOLDING	BAG1	CCT2	CD74	CHCHD4	DNAJB1	DNAJB12	DNAJB13	DNAJB14	DNAJB4	DNAJB5	DNAJC18	DNAJC2	DNAJC7	ENTPD5	ERO1A	FKBP1A	FKBP1B	GAK	HSPA13	HSPA14	HSPA1A	HSPA1B	HSPA1L	HSPA2	HSPA5	HSPA6	HSPA7	HSPA8	HSPA9	HSPD1	HSPE1	HSPH1	PTGES3	SDF2	SDF2L1	SELENOF	ST13	TOR1A	TOR1B	TOR2A	UGGT1
GOBP_DE_NOVO_PYRIMIDINE_NUCLEOBASE_BIOSYNTHETIC_PROCESS	https://www.gsea-msigdb.org/gsea/msigdb/human/geneset/GOBP_DE_NOVO_PYRIMIDINE_NUCLEOBASE_BIOSYNTHETIC_PROCESS	CAD	CMPK1	CPS1	DHODH	MTOR	UMPS
GOBP_DGMP_METABOLIC_PROCESS	https://www.gsea-msigdb.org/gsea/msigdb/human/geneset/GOBP_DGMP_METABOLIC_PROCESS	GDA	NT5C	NT5C1A	NT5C2	XDH
GOBP_DIACYLGLYCEROL_BIOSYNTHETIC_PROCESS	https://www.gsea-msigdb.org/gsea/msigdb/human/geneset/GOBP_DIACYLGLYCEROL_BIOSYNTHETIC_PROCESS	ANG	AVIL	DGAT2	GPAM	MOGAT1	MOGAT2	PLA2G15	PLCE1	PNPLA2
GOBP_DIACYLGLYCEROL_CATABOLIC_PROCESS	https://www.gsea-msigdb.org/gsea/msigdb/human/geneset/GOBP_DIACYLGLYCEROL_CATABOLIC_PROCESS	APOA2	DAGLA	DAGLB	LIPE	PLB1
GOBP_DIACYLGLYCEROL_METABOLIC_PROCESS	https://www.gsea-msigdb.org/gsea/msigdb/human/geneset/GOBP_DIACYLGLYCEROL_METABOLIC_PROCESS	ANG	APOA2	AVIL	DAGLA	DAGLB	DGAT1	DGAT2	DGKA	DGKB	DGKD	DGKE	DGKG	DGKH	DGKI	DGKK	DGKQ	DGKZ	GPAM	GPAT4	LIPE	MOGAT1	MOGAT2	PGS1	PLA2G15	PLB1	PLCE1	PNPLA2
GOBP_DIADENOSINE_POLYPHOSPHATE_CATABOLIC_PROCESS	https://www.gsea-msigdb.org/gsea/msigdb/human/geneset/GOBP_DIADENOSINE_POLYPHOSPHATE_CATABOLIC_PROCESS	FHIT	NUDT10	NUDT11	NUDT3	NUDT4	NUDT4B
GOBP_DIADENOSINE_POLYPHOSPHATE_METABOLIC_PROCESS	https://www.gsea-msigdb.org/gsea/msigdb/human/geneset/GOBP_DIADENOSINE_POLYPHOSPHATE_METABOLIC_PROCESS	FHIT	GARS1	KARS1	NUDT10	NUDT11	NUDT3	NUDT4	NUDT4B
GOBP_DIAPEDESIS	https://www.gsea-msigdb.org/gsea/msigdb/human/geneset/GOBP_DIAPEDESIS	CD99L2	CRK	CRKL	FER	ITGA4	PECAM1	TRIM55
GOBP_DIAPHRAGM_DEVELOPMENT	https://www.gsea-msigdb.org/gsea/msigdb/human/geneset/GOBP_DIAPHRAGM_DEVELOPMENT	ASS1	BASP1	DISP1	FGFRL1	MSC	STRA6	TCF21	WT1
GOBP_DICARBOXYLIC_ACID_BIOSYNTHETIC_PROCESS	https://www.gsea-msigdb.org/gsea/msigdb/human/geneset/GOBP_DICARBOXYLIC_ACID_BIOSYNTHETIC_PROCESS	ACMSD	GLS	GLS2	GLUD1	GLUD2	GOT1	GOT1L1	GOT2	HAAO	KMO	KYNU	MTHFD1	MTHFD1L
GOBP_DICARBOXYLIC_ACID_CATABOLIC_PROCESS	https://www.gsea-msigdb.org/gsea/msigdb/human/geneset/GOBP_DICARBOXYLIC_ACID_CATABOLIC_PROCESS	AASDHPPT	ACOT4	ACOT8	ACSF3	ADHFE1	ALDH1L1	ALDH1L2	ASPA	DDO	GAD1	GAD2	GLUD1	GLUD2	GLUL	GOT1	GOT2	MTHFS	PM20D2	QPRT
GOBP_DICARBOXYLIC_ACID_METABOLIC_PROCESS	https://www.gsea-msigdb.org/gsea/msigdb/human/geneset/GOBP_DICARBOXYLIC_ACID_METABOLIC_PROCESS	AADAT	AASDHPPT	ACLY	ACMSD	ACOT4	ACOT8	ACSF3	ADHFE1	ADSS1	ADSS2	ALDH18A1	ALDH1L1	ALDH1L2	ALDH4A1	ALDH5A1	AMDHD1	ASL	ASPA	ASS1	ATCAY	ATIC	D2HGDH	DDO	DGLUCY	DHFR	DHFR2	DHFRP1	DLST	FH	FOLR1	FPGS	FTCD	GAD1	GAD2	GCLC	GCLM	GGT1	GLS	GLS2	GLUD1	GLUD2	GLUL	GOT1	GOT1L1	GOT2	GPT2	GRHPR	HAAO
GOBP_DICARBOXYLIC_ACID_TRANSPORT	https://www.gsea-msigdb.org/gsea/msigdb/human/geneset/GOBP_DICARBOXYLIC_ACID_TRANSPORT	ABAT	ABCC2	ABCC5	ABCC8	ADORA1	ADORA2A	AGXT	APBA1	ARL6IP1	ARL6IP5	ATP1A2	AVP	AVPR1A	CLN8	DTNBP1	FOLR1	FOLR2	FOLR3	GABBR1	GFAP	GIPC1	GJA1	GNAT2	GRM1	GRM2	GRM7	HRH3	ITGB1	KCNJ10	KCNJ8	KMO	LRP2	LRRC8A	LRRC8C	LRRC8D	LRRC8E	NF1	NPY5R	NTRK2	NTSR1	P2RX7	PDPN	PER2	PRAF2	PRKG1	PSEN1	RAB3GAP1	SLC12A2
GOBP_DICHOTOMOUS_SUBDIVISION_OF_AN_EPITHELIAL_TERMINAL_UNIT	https://www.gsea-msigdb.org/gsea/msigdb/human/geneset/GOBP_DICHOTOMOUS_SUBDIVISION_OF_AN_EPITHELIAL_TERMINAL_UNIT	AREG	CELSR1	CTSH	FOXD1	NRP1	PLXNA1	PLXND1	SEMA3C
GOBP_DIENCEPHALON_DEVELOPMENT	https://www.gsea-msigdb.org/gsea/msigdb/human/geneset/GOBP_DIENCEPHALON_DEVELOPMENT	ALDH1A2	ARX	BAX	BMP2	BMP4	BMPR1A	CDH1	CHRNB2	CNTNAP2	CREB1	CTNNB1	DRD2	FGF10	FGF2	FGF8	FOXB1	GATA2	GBX2	GHRH	GHRHR	GLI1	GLI2	GSX1	HAP1	HES1	HESX1	INHBB	ISL1	KCNC1	KCNC2	LHX3	MECP2	NCOA1	NDNF	NHLH2	NKX2-1	NKX2-6	NOG	NR0B1	NR4A2	NRP1	NRP2	OGDH	OLIG2	OTP	OTX1	PAX6	PCSK1
GOBP_DIET_INDUCED_THERMOGENESIS	https://www.gsea-msigdb.org/gsea/msigdb/human/geneset/GOBP_DIET_INDUCED_THERMOGENESIS	ADRB1	ADRB2	ADRB3	APPL2	BMP8A	MC4R	OMA1	SCT	SCTR	SORL1	TRPV1	TRPV4	UCP1
GOBP_DIGESTION	https://www.gsea-msigdb.org/gsea/msigdb/human/geneset/GOBP_DIGESTION	ABCG5	ABCG8	ACO1	ADRA2A	AKR1C1	AKR1C2	AKR1D1	AMY2A	APOA1	APOA2	APOA4	AQP1	AQP5	ARX	ASAH2	CAPN9	CCK	CCKBR	CD36	CEL	CHIA	CHIT1	CHRM1	CHRM3	CHRM5	CLPS	CLPSL1	CLPSL2	COPA	CRACD	CTRB1	CTRB2	CYP39A1	CYP8B1	DCANP1	ENPP7	EPB41	EZR	F11R	FABP1	FABP2	FGF10	GCNT3	GHRL	GHSR	GKN1	HAMP	HIP1R
GOBP_DIGESTIVE_SYSTEM_DEVELOPMENT	https://www.gsea-msigdb.org/gsea/msigdb/human/geneset/GOBP_DIGESTIVE_SYSTEM_DEVELOPMENT	ACVR2B	ADA	AGR2	AHI1	ALDH1A2	ALX4	ASCL1	ASS1	BARX1	BBS7	BCL2	C1GALT1	CBFA2T2	CCDC103	CCDC39	CCDC40	CCKBR	CDKN1A	CDKN1C	CDX2	CELA1	CHD8	CLDN18	CLMP	COBL	COL3A1	CPS1	CRKL	CTNNB1	CXCL8	CYP1A1	DACT1	DCHS1	DNAAF1	EDNRB	EGFR	EPB41L5	EPHB3	EXT1	FGF10	FGF9	FGFR2	FOXE1	FOXF1	FOXF2	FOXL1	FZD5	GATA4
GOBP_DIGESTIVE_SYSTEM_PROCESS	https://www.gsea-msigdb.org/gsea/msigdb/human/geneset/GOBP_DIGESTIVE_SYSTEM_PROCESS	ABCG5	ABCG8	ACO1	ADRA2A	AKR1C1	APOA1	APOA2	APOA4	AQP1	AQP5	CCKBR	CD36	CEL	CHRM1	CHRM3	CHRM5	COPA	CRACD	CYP8B1	DCANP1	ENPP7	EPB41	EZR	F11R	FABP1	FABP2	FGF10	GCNT3	GHRL	GHSR	HAMP	HIP1R	HRH2	HTR4	IL10RA	IL17A	INAVA	IREB2	KCNN4	KCNQ1	LDLR	LEP	LIMA1	LIPA	LPCAT3	MDK	MOGAT2	MUC13
GOBP_DIGESTIVE_TRACT_MORPHOGENESIS	https://www.gsea-msigdb.org/gsea/msigdb/human/geneset/GOBP_DIGESTIVE_TRACT_MORPHOGENESIS	ACVR2B	AGR2	AHI1	BBS7	BCL2	CTNNB1	DACT1	EGFR	EPB41L5	EPHB3	FGF10	FGFR2	FOXF1	GATA4	GLI1	GLI2	GLI3	HIF1A	HLX	HNF1B	HOXA13	HOXD13	ID2	IHH	NIPBL	NKX2-3	NODAL	NOTCH1	NPR2	OVOL2	PDGFRA	PERCC1	RBPMS2	SFRP1	SFRP2	SFRP5	SHH	SHOX2	SIX2	SMAD2	SMAD3	SOX10	SOX11	SOX17	STRA6	TCF21	TP63	WNT11
GOBP_DIOL_BIOSYNTHETIC_PROCESS	https://www.gsea-msigdb.org/gsea/msigdb/human/geneset/GOBP_DIOL_BIOSYNTHETIC_PROCESS	ABCA2	ACER1	ACER2	ACER3	ASAH1	ASAH2	DHFR	DHFRP1	GBA1	GCH1	PCBD1	PCBD2	PTS	QDPR	SPHK1	SPHK2	SPR	SPTLC1	SPTLC2	SPTLC3	SPTSSA	SPTSSB
GOBP_DIOL_METABOLIC_PROCESS	https://www.gsea-msigdb.org/gsea/msigdb/human/geneset/GOBP_DIOL_METABOLIC_PROCESS	ABCA2	ACER1	ACER2	ACER3	ASAH1	ASAH2	DEGS2	DHFR	DHFRP1	GBA1	GCH1	LRP2	NAAA	PCBD1	PCBD2	PLPP1	PLPP2	PLPP3	PRKG2	PTS	QDPR	SGPP1	SGPP2	SPHK1	SPHK2	SPR	SPTLC1	SPTLC2	SPTLC3	SPTSSA	SPTSSB
GOBP_DIPEPTIDE_TRANSMEMBRANE_TRANSPORT	https://www.gsea-msigdb.org/gsea/msigdb/human/geneset/GOBP_DIPEPTIDE_TRANSMEMBRANE_TRANSPORT	CA2	SLC15A1	SLC15A2	SLC15A3	SLC15A4	SLC26A6	SLC7A11
GOBP_DIPHOSPHOINOSITOL_POLYPHOSPHATE_METABOLIC_PROCESS	https://www.gsea-msigdb.org/gsea/msigdb/human/geneset/GOBP_DIPHOSPHOINOSITOL_POLYPHOSPHATE_METABOLIC_PROCESS	NUDT10	NUDT11	NUDT3	NUDT4	NUDT4B
GOBP_DIRECT_OSSIFICATION	https://www.gsea-msigdb.org/gsea/msigdb/human/geneset/GOBP_DIRECT_OSSIFICATION	AXIN2	COL1A1	CTSK	FGF18	GIT1	MMP2	MN1
GOBP_DISACCHARIDE_METABOLIC_PROCESS	https://www.gsea-msigdb.org/gsea/msigdb/human/geneset/GOBP_DISACCHARIDE_METABOLIC_PROCESS	B4GALT1	BRAF	FBP1	FBP2	GAA	GANC	IDUA	LALBA	LCT	MGAM	SI	TREH
GOBP_DISRUPTION_OF_ANATOMICAL_STRUCTURE_IN_ANOTHER_ORGANISM	https://www.gsea-msigdb.org/gsea/msigdb/human/geneset/GOBP_DISRUPTION_OF_ANATOMICAL_STRUCTURE_IN_ANOTHER_ORGANISM	APOL1	ARG1	AZU1	BCL2L1	C5	C6	C7	C8A	C8B	C8G	C9	CAMP	CCL13	CFHR1	CFHR2	CFHR5	CHGA	CLEC7A	CSNK2A1	CSNK2B	CST11	CTSG	CXCL6	DCD	DEFA1	DEFA1B	DEFA3	DEFA4	DEFA5	DEFA6	DEFB103A	DEFB103B	DEFB118	DEFB128	DEFB132	DEFB136	DEFB4A	ELANE	F2	F2RL1	FCER2	GAPDH	GBP1	GBP2	GBP3	GBP5	GBP7	GNLY
GOBP_DISRUPTION_OF_CELLULAR_ANATOMICAL_STRUCTURE_IN_ANOTHER_ORGANISM	https://www.gsea-msigdb.org/gsea/msigdb/human/geneset/GOBP_DISRUPTION_OF_CELLULAR_ANATOMICAL_STRUCTURE_IN_ANOTHER_ORGANISM	DEFA1	DEFA1B	DEFA3	DEFA4	DEFA5	DEFA6	REG1A	REG1B	REG3A	REG3G
GOBP_DISRUPTION_OF_PLASMA_MEMBRANE_INTEGRITY_IN_ANOTHER_ORGANISM	https://www.gsea-msigdb.org/gsea/msigdb/human/geneset/GOBP_DISRUPTION_OF_PLASMA_MEMBRANE_INTEGRITY_IN_ANOTHER_ORGANISM	DEFA1	DEFA1B	DEFA3	DEFA4	DEFA5	DEFA6
GOBP_DISTAL_CONVOLUTED_TUBULE_DEVELOPMENT	https://www.gsea-msigdb.org/gsea/msigdb/human/geneset/GOBP_DISTAL_CONVOLUTED_TUBULE_DEVELOPMENT	CALB1	PAX2	PAX8	POU3F3	UMOD
GOBP_DISTAL_TUBULE_DEVELOPMENT	https://www.gsea-msigdb.org/gsea/msigdb/human/geneset/GOBP_DISTAL_TUBULE_DEVELOPMENT	CALB1	JAG1	KLHL3	NOTCH1	PAX2	PAX8	PKD1	PKD2	POU3F3	TFAP2B	UMOD	WNK4
GOBP_DITERPENOID_BIOSYNTHETIC_PROCESS	https://www.gsea-msigdb.org/gsea/msigdb/human/geneset/GOBP_DITERPENOID_BIOSYNTHETIC_PROCESS	AKR1C3	ALDH1A2	ALDH1A3	ALDH8A1	BCO1	CYP1A1	DHRS9	PRMT3	RBP1	RDH10
GOBP_DNA_BIOSYNTHETIC_PROCESS	https://www.gsea-msigdb.org/gsea/msigdb/human/geneset/GOBP_DNA_BIOSYNTHETIC_PROCESS	ACD	ACVRL1	ADIPOQ	ANKRD1	ATM	ATR	AURKB	BMPR2	CCN2	CCNA2	CCT2	CCT3	CCT4	CCT5	CCT6A	CCT7	CCT8	CDKN1A	CDKN2D	CENPF	CERS1	CHEK1	CHRAC1	CHTF18	CHTF8	CTC1	CTNNB1	CYP1B1	DACH1	DCP2	DKC1	DNAJC2	DNTT	DSCC1	DTL	ERCC4	EXOSC10	FAAP20	FBXO4	FGF2	FGFR4	GAR1	GDF2	GFER	GNL3L	GREM1	GRHL2	HGF
GOBP_DNA_CATABOLIC_PROCESS	https://www.gsea-msigdb.org/gsea/msigdb/human/geneset/GOBP_DNA_CATABOLIC_PROCESS	AIFM1	APAF1	APEX1	ATM	BAX	CECR2	CIDEA	DFFA	DFFB	DICER1	DNASE1	DNASE1L1	DNASE1L2	DNASE1L3	DNASE2	DNASE2B	ENDOG	EXOG	FBH1	FOXL2	HSF1	IL6	ISG20	MIR146A	MUS81	NMNAT1	REXO4	RGN	SETMAR	ST20	TREX1	VPS54
GOBP_DNA_CONFORMATION_CHANGE	https://www.gsea-msigdb.org/gsea/msigdb/human/geneset/GOBP_DNA_CONFORMATION_CHANGE	ABL1	ANXA1	ASCC1	ASCC2	ASCC3	BLM	BRIP1	CDC45	CHD1L	CHD8	CHTF18	CHTF8	DDX1	DDX11	DDX11L8	DDX12P	DDX3X	DHX30	DHX36	DHX9	DNA2	DSCC1	DTD1	ERCC2	ERCC3	FANCM	FBH1	G3BP1	GINS1	GINS2	GINS3	GINS4	GTF2H2	HELB	HELQ	HFM1	HHEX	HMGA1	HMGB1	HMGB2	HMGB3	HNRNPA2B1	IGHMBP2	MCM2	MCM3	MCM4	MCM5	MCM6
GOBP_DNA_CYTOSINE_DEAMINATION	https://www.gsea-msigdb.org/gsea/msigdb/human/geneset/GOBP_DNA_CYTOSINE_DEAMINATION	AICDA	APOBEC3A	APOBEC3B	APOBEC3C	APOBEC3D	APOBEC3F	APOBEC3G	APOBEC3H	CDADC1
GOBP_DNA_DAMAGE_RESPONSE	https://www.gsea-msigdb.org/gsea/msigdb/human/geneset/GOBP_DNA_DAMAGE_RESPONSE	AATF	ABL1	ABRAXAS1	ACD	ACER2	ACKR3	ACTB	ACTL6A	ACTL6B	ACTR2	ACTR5	ACTR8	ADPRS	AEN	AIM2	ALKBH1	ALKBH2	ALKBH3	ALKBH7	ALKBH8	ANKLE1	ANKRD1	AP5S1	AP5Z1	APBB1	APC	APEX1	APEX2	APLF	APTX	ARID1A	ARID1B	ARID2	ARMT1	ASCC1	ASCC2	ASCC3	ASF1A	ASH2L	ATAD5	ATF2	ATM	ATMIN	ATP23	ATR	ATRIP	ATRX	ATXN3
GOBP_DNA_DAMAGE_RESPONSE_SIGNAL_TRANSDUCTION_BY_P53_CLASS_MEDIATOR	https://www.gsea-msigdb.org/gsea/msigdb/human/geneset/GOBP_DNA_DAMAGE_RESPONSE_SIGNAL_TRANSDUCTION_BY_P53_CLASS_MEDIATOR	ACER2	ANKRD1	ATM	ATR	ATRX	BATF	BCL3	BRCA2	CASP2	CD44	CD74	CDKN1A	CDKN1B	CHEK2	COPS3	CRADD	DDX5	DYRK1A	DYRK3	E2F7	EEF1E1	FOXM1	GML	GTSE1	HIC1	HIPK2	ING4	KAT5	KDM1A	KMT5A	MARCHF7	MDM2	MDM4	MIF	MSX1	MUC1	MYO6	NBN	NDRG1	NPM1	PAXIP1	PIDD1	PLA2R1	PLK2	PLK3	PMAIP1	PML	PPM1D
GOBP_DNA_DAMAGE_RESPONSE_SIGNAL_TRANSDUCTION_BY_P53_CLASS_MEDIATOR_RESULTING_IN_CELL_CYCLE_ARREST	https://www.gsea-msigdb.org/gsea/msigdb/human/geneset/GOBP_DNA_DAMAGE_RESPONSE_SIGNAL_TRANSDUCTION_BY_P53_CLASS_MEDIATOR_RESULTING_IN_CELL_CYCLE_ARREST	ATM	CASP2	CDKN1A	CDKN1B	CHEK2	CRADD	GML	GTSE1	MDM2	MUC1	PIDD1	PLK2	PLK3	PML	PRAP1	RPL26	TP53	TRIAP1
GOBP_DNA_DAMAGE_RESPONSE_SIGNAL_TRANSDUCTION_RESULTING_IN_TRANSCRIPTION	https://www.gsea-msigdb.org/gsea/msigdb/human/geneset/GOBP_DNA_DAMAGE_RESPONSE_SIGNAL_TRANSDUCTION_RESULTING_IN_TRANSCRIPTION	BRCA2	CDKN1A	CHEK2	COPS3	FOXM1	HIPK2	ING4	KAT5	MAD2L2	MUC1	PYHIN1	RPL26	RPS27L	RPS6KA6	SP100	TFAP4	TP53	ZNF385A	ZNHIT1
GOBP_DNA_DEALKYLATION	https://www.gsea-msigdb.org/gsea/msigdb/human/geneset/GOBP_DNA_DEALKYLATION	A1CF	AICDA	ALKBH1	ALKBH2	ALKBH3	ALKBH4	APEX1	APOBEC1	APOBEC2	APOBEC3A	APOBEC3B	APOBEC3C	APOBEC3D	APOBEC3F	APOBEC3G	APOBEC3H	ASCC1	ASCC2	ASCC3	DPPA3	EOMES	FTO	GATA3	HNRNPAB	MGMT	MPG	OTUD4	PAX6	STPG1	STPG4	TDG	TET1	TET2	TET3	TOX	TRIM28	USP7	USP9X
GOBP_DNA_DEALKYLATION_INVOLVED_IN_DNA_REPAIR	https://www.gsea-msigdb.org/gsea/msigdb/human/geneset/GOBP_DNA_DEALKYLATION_INVOLVED_IN_DNA_REPAIR	ALKBH1	ALKBH2	ALKBH3	ASCC1	ASCC2	ASCC3	FTO	MGMT	MPG
GOBP_DNA_DEAMINATION	https://www.gsea-msigdb.org/gsea/msigdb/human/geneset/GOBP_DNA_DEAMINATION	AICDA	APOBEC3A	APOBEC3B	APOBEC3C	APOBEC3D	APOBEC3F	APOBEC3G	APOBEC3H	CDADC1	EXOSC3	EXOSC4	EXOSC5	EXOSC6
GOBP_DNA_DOUBLE_STRAND_BREAK_PROCESSING	https://www.gsea-msigdb.org/gsea/msigdb/human/geneset/GOBP_DNA_DOUBLE_STRAND_BREAK_PROCESSING	BLM	BRIP1	C14orf39	DNA2	EXD2	HELB	HELQ	MRE11	NBN	RAD50	RAD52	RBBP8	RNF138	SETMAR	SLX1A	SLX1B	SLX4	SMARCAD1	SPO11	UBE2N	UBE2V2
GOBP_DNA_INTEGRATION	https://www.gsea-msigdb.org/gsea/msigdb/human/geneset/GOBP_DNA_INTEGRATION	BANF1	GIN1	KRBA2	NYNRIN	SCAND3	SETMAR	SMARCB1	THAP9
GOBP_DNA_INTEGRITY_CHECKPOINT_SIGNALING	https://www.gsea-msigdb.org/gsea/msigdb/human/geneset/GOBP_DNA_INTEGRITY_CHECKPOINT_SIGNALING	ABRAXAS1	ATF2	ATM	ATR	ATRIP	BABAM1	BABAM2	BARD1	BLM	BRCA1	BRCA2	BRCC3	BRIP1	BRSK1	CAMSAP3	CASP2	CCAR2	CCND1	CCNG1	CDC14B	CDC45	CDC5L	CDC6	CDK1	CDK2	CDK5RAP3	CDKN1A	CDKN1B	CDT1	CEP63	CHEK1	CHEK2	CLOCK	CLSPN	CRADD	CRY1	CUL4A	DDX39B	DNA2	DONSON	DOT1L	DTL	DTX3L	E2F1	EIF2AK4	EME1	EME2	ERCC6
GOBP_DNA_LIGATION	https://www.gsea-msigdb.org/gsea/msigdb/human/geneset/GOBP_DNA_LIGATION	APLF	APTX	HMGB1	LIG1	LIG3	LIG4	MGMT	NHEJ1	PARP3	PNKP	RAD51	TFIP11	TOP2A	XRCC1	XRCC4	XRCC6
GOBP_DNA_LIGATION_INVOLVED_IN_DNA_REPAIR	https://www.gsea-msigdb.org/gsea/msigdb/human/geneset/GOBP_DNA_LIGATION_INVOLVED_IN_DNA_REPAIR	LIG3	LIG4	NHEJ1	PNKP	XRCC4
GOBP_DNA_METABOLIC_PROCESS	https://www.gsea-msigdb.org/gsea/msigdb/human/geneset/GOBP_DNA_METABOLIC_PROCESS	A1CF	ABL1	ABRAXAS1	ACD	ACTB	ACTL6A	ACTL6B	ACTR2	ACTR5	ACTR8	ACVRL1	ADIPOQ	ADPRS	ADRA2A	AEN	AICDA	AIFM1	AKT1	ALKBH1	ALKBH2	ALKBH3	ALKBH4	ALYREF	ANKLE1	ANKRD1	ANKRD17	ANKRD31	ANXA3	AP5S1	AP5Z1	APAF1	APEX1	APEX2	APLF	APOBEC1	APOBEC2	APOBEC3A	APOBEC3B	APOBEC3C	APOBEC3D	APOBEC3F	APOBEC3G	APOBEC3H	APTX	ARID1A	ARID1B	ARID2	ARID4A
GOBP_DNA_METHYLATION	https://www.gsea-msigdb.org/gsea/msigdb/human/geneset/GOBP_DNA_METHYLATION	ARID4A	ARID4B	ATF7IP	ATRX	BAZ2A	BEND3	BMI1	CTCF	DNMT1	DNMT3A	DNMT3B	DNMT3L	EHMT1	EHMT2	EOMES	EZH2	FOS	GATAD2A	GRHL2	HELLS	HEMK1	KMT2A	KMT2E	MAPT-AS1	MBD1	MBD2	MBD3	MECP2	METTL4	METTL7A	MGMT	MIR29A	MIR29B1	MIR29C	MIS18A	MPHOSPH8	MTA2	MTRR	N6AMT1	PARP1	PAX6	PPM1D	PRDM14	PRMT5	RLF	SMARCA5	SPOCD1	STPG4
GOBP_DNA_METHYLATION_DEPENDENT_HETEROCHROMATIN_FORMATION	https://www.gsea-msigdb.org/gsea/msigdb/human/geneset/GOBP_DNA_METHYLATION_DEPENDENT_HETEROCHROMATIN_FORMATION	AICDA	APOBEC1	ATF7IP	ATF7IP2	DNMT1	DNMT3A	DYRK1A	HDAC1	HELLS	KDM1A	L3MBTL3	MBD2	MBD3	MBD3L1	MBD3L2	MBD3L2B	MBD3L3	MBD3L4	MBD3L5	MORC2	MPHOSPH8	MYC	PPHLN1	RESF1	SAMD1	SETDB1	SETDB2	SIRT1	TASOR	TET1	TEX15	TRIM28	ZNF304
GOBP_DNA_METHYLATION_ON_CYTOSINE	https://www.gsea-msigdb.org/gsea/msigdb/human/geneset/GOBP_DNA_METHYLATION_ON_CYTOSINE	DNMT1	DNMT3A	DNMT3B	DNMT3L	EHMT2	STPG4
GOBP_DNA_MODIFICATION	https://www.gsea-msigdb.org/gsea/msigdb/human/geneset/GOBP_DNA_MODIFICATION	A1CF	AICDA	ALKBH1	ALKBH2	ALKBH3	ALKBH4	APEX1	APOBEC1	APOBEC2	APOBEC3A	APOBEC3B	APOBEC3C	APOBEC3D	APOBEC3F	APOBEC3G	APOBEC3H	ARID4A	ARID4B	ASCC1	ASCC2	ASCC3	ATF7IP	ATRX	BAZ2A	BEND3	BMI1	CDADC1	CTCF	CYP1B1	DNMT1	DNMT3A	DNMT3B	DNMT3L	DNTT	DPPA3	EHMT1	EHMT2	EOMES	EXOSC3	EXOSC4	EXOSC5	EXOSC6	EZH2	FOS	FTO	GATA3	GATAD2A	GRHL2
GOBP_DNA_PROTECTION	https://www.gsea-msigdb.org/gsea/msigdb/human/geneset/GOBP_DNA_PROTECTION	CBS	DCTPP1	ENSG00000274276	ERCC6	GLRX2	NUDT1	NUDT15
GOBP_DNA_RECOMBINATION	https://www.gsea-msigdb.org/gsea/msigdb/human/geneset/GOBP_DNA_RECOMBINATION	ABL1	ACTB	ACTL6A	ACTR2	ACTR5	ACTR8	AICDA	ALYREF	ANKLE1	ANKRD31	AP5S1	AP5Z1	APEX1	APEX2	APLF	ARID2	ATAD5	ATM	AUNIP	BARD1	BATF	BCL11B	BCL6	BLM	BRCA1	BRCA2	BRD8	BRIP1	BRME1	C11orf80	C14orf39	C1orf146	CCNB1IP1	CCR6	CD28	CD40	CD40LG	CDC45	CDC7	CENPS	CENPX	CGAS	CHD4	CHEK1	CLCF1	CNTD1	CYREN	DCAF1
GOBP_DNA_REPAIR	https://www.gsea-msigdb.org/gsea/msigdb/human/geneset/GOBP_DNA_REPAIR	ABL1	ABRAXAS1	ACTB	ACTL6A	ACTL6B	ACTR2	ACTR5	ACTR8	ADPRS	ALKBH1	ALKBH2	ALKBH3	ANKLE1	AP5S1	AP5Z1	APEX1	APEX2	APLF	APTX	ARID1A	ARID1B	ARID2	ASCC1	ASCC2	ASCC3	ASF1A	ATM	ATP23	ATR	ATRIP	ATRX	ATXN3	ATXN7	ATXN7L3	AUNIP	AXIN2	BABAM1	BABAM2	BACH1	BARD1	BCCIP	BCL7A	BCL7B	BCL7C	BLM	BOD1L1	BRCA1	BRCA2
GOBP_DNA_REPAIR_DEPENDENT_CHROMATIN_REMODELING	https://www.gsea-msigdb.org/gsea/msigdb/human/geneset/GOBP_DNA_REPAIR_DEPENDENT_CHROMATIN_REMODELING	APLF	ASF1A	BABAM1	BRCC3	DTX3L	HDAC3	HDGFL2	HPF1	KAT5	KDM1A	PARP2	PHF1	RNF168	RNF8	SIRT1	SIRT6	SIRT7	TRIP12	UBR5	USP3
GOBP_DNA_REPLICATION	https://www.gsea-msigdb.org/gsea/msigdb/human/geneset/GOBP_DNA_REPLICATION	ACTL6A	ACTR5	ACTR8	ACVRL1	ADRA2A	AICDA	ALYREF	ANKRD17	ASF1A	ATAD5	ATF1	ATR	ATRX	BARD1	BAZ1A	BCAR3	BCL6	BLM	BOD1L1	BRCA1	BRCA2	BRPF3	CAMSAP3	CARM1	CCDC88A	CCNA2	CCNE1	CCNE2	CDC34	CDC45	CDC6	CDC7	CDK1	CDK2	CDK2AP1	CDK9	CDT1	CENPS	CENPX	CHAF1A	CHAF1B	CHEK1	CHRAC1	CHTF18	CHTF8	CINP	CIZ1	CTC1
GOBP_DNA_REPLICATION_CHECKPOINT_SIGNALING	https://www.gsea-msigdb.org/gsea/msigdb/human/geneset/GOBP_DNA_REPLICATION_CHECKPOINT_SIGNALING	CAMSAP3	CDC45	CDC6	CDT1	CLSPN	DNA2	HUS1	HUS1B	NAE1	ORC1	RAD17	RAD9A	RAD9B	TICRR	TIMELESS	TIPIN	TOPBP1	ZNF830
GOBP_DNA_REPLICATION_DEPENDENT_CHROMATIN_ASSEMBLY	https://www.gsea-msigdb.org/gsea/msigdb/human/geneset/GOBP_DNA_REPLICATION_DEPENDENT_CHROMATIN_ASSEMBLY	ASF1A	ASF1B	CHAF1A	CHAF1B	NASP	RBBP4
GOBP_DNA_REPLICATION_INITIATION	https://www.gsea-msigdb.org/gsea/msigdb/human/geneset/GOBP_DNA_REPLICATION_INITIATION	CCNE1	CCNE2	CDC34	CDC45	CDC6	CDK2	CDT1	CIZ1	GINS3	GMNN	KAT7	LRWD1	MCIDAS	MCM10	MCM2	MCM3	MCM4	MCM5	MCM6	MCM7	NBN	NOC3L	ORC1	ORC2	ORC3	ORC4	ORC5	ORC6	POLA1	POLA2	PRIM1	PRIM2	PURA	RPA4	TICRR	TOPBP1	WRNIP1
GOBP_DNA_REPLICATION_SYNTHESIS_OF_RNA_PRIMER	https://www.gsea-msigdb.org/gsea/msigdb/human/geneset/GOBP_DNA_REPLICATION_SYNTHESIS_OF_RNA_PRIMER	HELB	POLA1	POLA2	POLRMT	PRIM1	PRIM2	PRIMPOL
GOBP_DNA_STRAND_ELONGATION	https://www.gsea-msigdb.org/gsea/msigdb/human/geneset/GOBP_DNA_STRAND_ELONGATION	ACTL6A	ACTR5	ACTR8	DCLRE1B	DNA2	GINS1	INO80	INO80B	INO80C	INO80D	INO80E	LIG1	LIG3	MCM3	MCM4	MCM7	MCRS1	MRE11	NBN	NFRKB	NUCKS1	PCNA	POLA1	POLD2	POLD3	POLE	POLE3	POT1	RAD50	RFC3	RFC4	RUVBL1	RUVBL2	TERT	TFPT	UCHL5	YY1
GOBP_DNA_STRAND_ELONGATION_INVOLVED_IN_DNA_REPLICATION	https://www.gsea-msigdb.org/gsea/msigdb/human/geneset/GOBP_DNA_STRAND_ELONGATION_INVOLVED_IN_DNA_REPLICATION	DNA2	GINS1	LIG1	LIG3	MCM3	MCM4	MCM7	PCNA	POLA1	POLD2	POLD3	POLE	POLE3	RFC3	RFC4
GOBP_DNA_STRAND_RESECTION_INVOLVED_IN_REPLICATION_FORK_PROCESSING	https://www.gsea-msigdb.org/gsea/msigdb/human/geneset/GOBP_DNA_STRAND_RESECTION_INVOLVED_IN_REPLICATION_FORK_PROCESSING	BARD1	BRCA1	MRE11	NBN	RAD50	RBBP8	SAMHD1	ZNF365
GOBP_DNA_SYNTHESIS_INVOLVED_IN_DNA_REPAIR	https://www.gsea-msigdb.org/gsea/msigdb/human/geneset/GOBP_DNA_SYNTHESIS_INVOLVED_IN_DNA_REPAIR	CDKN2D	DTL	FAAP20	HROB	MAD2L2	PARP10	PCLAF	PCNA	POLA1	POLD1	POLD2	POLD3	POLD4	POLDIP2	POLE	POLE2	POLH	POLI	POLK	POLN	PRIMPOL	RCHY1	REV1	REV3L	RFC3	RRM1	RRM2B	SIRT1	SPATA22	SPRTN	SYCP1	TEX12	TREX1	USP1	USP10	USP43	VCP	WRN	WRNIP1	ZBTB1
GOBP_DNA_TEMPLATED_DNA_REPLICATION	https://www.gsea-msigdb.org/gsea/msigdb/human/geneset/GOBP_DNA_TEMPLATED_DNA_REPLICATION	AICDA	ALYREF	ASF1A	ATAD5	ATR	ATRX	BARD1	BAZ1A	BCL6	BLM	BOD1L1	BRCA1	BRCA2	CAMSAP3	CARM1	CCNE1	CCNE2	CDC34	CDC45	CDC6	CDC7	CDK2	CDK2AP1	CDK9	CDT1	CENPS	CENPX	CHRAC1	CHTF18	CHTF8	CIZ1	DACH1	DBF4	DBF4B	DDX11	DNA2	DNAJA3	DONSON	DSCC1	E2F7	E2F8	EME1	EME2	ENDOG	ETAA1	EXD2	FAM111A	FANCM
GOBP_DNA_TEMPLATED_DNA_REPLICATION_MAINTENANCE_OF_FIDELITY	https://www.gsea-msigdb.org/gsea/msigdb/human/geneset/GOBP_DNA_TEMPLATED_DNA_REPLICATION_MAINTENANCE_OF_FIDELITY	ALYREF	ASF1A	ATR	ATRX	BARD1	BLM	BOD1L1	BRCA1	BRCA2	CAMSAP3	CARM1	CDK9	CENPS	CENPX	DDX11	DNA2	DONSON	EME1	EME2	ETAA1	EXD2	FAM111A	FANCM	FBH1	GEN1	KHDC3L	MCM8	MCM9	MMS22L	MRE11	MUS81	NBN	NUCKS1	OOEP	PARP1	PCNA	POLD1	POLE	PRIMPOL	RAD50	RAD51	RBBP8	RFWD3	RTEL1	SAMHD1	SETMAR	SLFN11	SMARCAL1
GOBP_DNA_TEMPLATED_TRANSCRIPTION_ELONGATION	https://www.gsea-msigdb.org/gsea/msigdb/human/geneset/GOBP_DNA_TEMPLATED_TRANSCRIPTION_ELONGATION	ADRM1	ALYREF	AXIN1	BRD4	BTBD18	CCAR2	CCNK	CCNT1	CCNT2	CDC73	CDK12	CDK13	CDK9	CTDP1	CTNNB1	CTR9	DDX39B	EAF1	EAF2	EAPP	ELL	ELL2	ELL3	ELOA	ELOA2	ELOB	ELOF1	ELP2	ELP4	ENY2	ERCC2	ERCC3	ERCC6	EZH2	GLYR1	GTF2F1	GTF2F2	GTF2H5	HEXIM1	HMGN1	HNRNPU	HTATSF1	INTS1	INTS10	INTS11	INTS12	INTS13	INTS14
GOBP_DNA_TEMPLATED_TRANSCRIPTION_INITIATION	https://www.gsea-msigdb.org/gsea/msigdb/human/geneset/GOBP_DNA_TEMPLATED_TRANSCRIPTION_INITIATION	ATF7IP	BAZ2A	BCLAF1	BDP1	BRF1	BRF2	CAND1	CAVIN1	CCNH	CDK4	CDK7	CDK9	CRCP	CTNNBIP1	DHX36	DR1	E2F2	E2F3	ELOA	ELOB	ELOC	ERCC1	ERCC3	ERCC6	ESR1	FOSL1	GTF2A1	GTF2A1L	GTF2A2	GTF2B	GTF2E1	GTF2E2	GTF2F1	GTF2F2	GTF2H2	GTF2H5	GTF3C1	GTF3C4	GTF3C5	HEY2	HMGB1	HNF1A	HNF1B	JUN	MAZ	MDC1	MED1	MED10
GOBP_DNA_TEMPLATED_TRANSCRIPTION_TERMINATION	https://www.gsea-msigdb.org/gsea/msigdb/human/geneset/GOBP_DNA_TEMPLATED_TRANSCRIPTION_TERMINATION	CAVIN1	DHX9	MAZ	MED18	MTERF1	MTERF2	PCF11	POLR1H	POLR2A	POLR3K	PRMT5	SCAF4	SCAF8	SETX	SMN1	SMN2	SSU72	SSU72L1	SSU72L2	SSU72L3	SSU72L4	SSU72L5	SSU72L6	TTF1	TTF2	WDR82	WNK1	XRN2	ZC3H4	ZMPSTE24
GOBP_DNA_TOPOLOGICAL_CHANGE	https://www.gsea-msigdb.org/gsea/msigdb/human/geneset/GOBP_DNA_TOPOLOGICAL_CHANGE	ERCC3	HMGB1	HMGB2	TOP1	TOP1MT	TOP2A	TOP2B	TOP3A	TOP3B
GOBP_DNA_UNWINDING_INVOLVED_IN_DNA_REPLICATION	https://www.gsea-msigdb.org/gsea/msigdb/human/geneset/GOBP_DNA_UNWINDING_INVOLVED_IN_DNA_REPLICATION	BLM	CDC45	GINS1	GINS2	GINS3	GINS4	HMGA1	MCM2	MCM3	MCM4	MCM5	MCM6	MCM7	PURA	RAD51	RECQL	RECQL4	RECQL5	SSBP1	TWNK	WRN
GOBP_DOLICHYL_DIPHOSPHATE_METABOLIC_PROCESS	https://www.gsea-msigdb.org/gsea/msigdb/human/geneset/GOBP_DOLICHYL_DIPHOSPHATE_METABOLIC_PROCESS	DHDDS	DOLK	DOLPP1	NUS1	SRD5A3
GOBP_DOPAMINERGIC_NEURON_DIFFERENTIATION	https://www.gsea-msigdb.org/gsea/msigdb/human/geneset/GOBP_DOPAMINERGIC_NEURON_DIFFERENTIATION	CDNF	CSNK1D	CSNK1E	CTNNB1	DKK1	DMRTA2	EN1	EN2	FERD3L	FGF20	FGF8	FOXA1	FOXA2	FZD1	GSK3B	HIF1A	HPRT1	LMX1A	LMX1B	LRP6	MANF	NR4A2	OTP	OTX2	PHOX2A	PHOX2B	PITX3	RSPO2	RYK	SFRP1	SFRP2	SHH	SMO	TIAM1	VEGFA	VEGFD	WNT1	WNT2	WNT3	WNT3A	WNT5A	WNT9B
GOBP_DOPAMINE_BIOSYNTHETIC_PROCESS	https://www.gsea-msigdb.org/gsea/msigdb/human/geneset/GOBP_DOPAMINE_BIOSYNTHETIC_PROCESS	ALDH2	DAO	DDC	GCH1	GPR37	NR4A2	PARK7	SLC6A3	SNCA	TGFB2	TH	VPS35
GOBP_DOPAMINE_METABOLIC_PROCESS	https://www.gsea-msigdb.org/gsea/msigdb/human/geneset/GOBP_DOPAMINE_METABOLIC_PROCESS	ABAT	ALDH2	ATP7A	CHRNB2	COMT	DAO	DBH	DDC	DRD1	DRD2	DRD3	DRD4	GCH1	GNAT2	GPR37	GRIN2A	HPRT1	HTR1A	ITGAM	ITGB2	MAOA	MAOB	MOXD1	MOXD2P	NPR1	NR4A2	PARK7	PDE1B	PNKD	PRKN	SLC1A1	SLC6A3	SNCA	SNCAIP	SNCB	SULT1A3	SULT1A4	TACR3	TGFB2	TH	VPS35
GOBP_DOPAMINE_RECEPTOR_SIGNALING_PATHWAY	https://www.gsea-msigdb.org/gsea/msigdb/human/geneset/GOBP_DOPAMINE_RECEPTOR_SIGNALING_PATHWAY	ADCY5	ADCY6	ALK	ARRB2	CALY	CAV2	DRD1	DRD2	DRD3	DRD4	DRD5	DTNBP1	FLNA	GNA11	GNA14	GNA15	GNAI3	GNAO1	GNAQ	GNAS	GNB1	GNB5	GNG2	GSK3A	GSK3B	KLF16	LRRK2	NCSTN	NHERF1	NSG1	NSG2	PALM	PRMT5	PTGER1	RGS4	RGS8	SLC1A1	VPS35
GOBP_DOPAMINE_SECRETION	https://www.gsea-msigdb.org/gsea/msigdb/human/geneset/GOBP_DOPAMINE_SECRETION	ABAT	CHRNA4	CHRNA6	CHRNB2	CNR1	CXCL12	DRD2	DRD3	DTNBP1	FGF20	GABBR1	GDNF	GNAT1	GRM2	HTR1B	HTR2A	KCNA2	KPNA4	OPRK1	PINK1	PRKCB	PRKN	SLC18A2	SNCA	SNCG	SYT1	SYT10	SYT11	SYT12	SYT13	SYT15	SYT17	SYT2	SYT3	SYT4	SYT5	SYT6	SYT7	SYT8	SYT9	TGM2
GOBP_DOPAMINE_TRANSPORT	https://www.gsea-msigdb.org/gsea/msigdb/human/geneset/GOBP_DOPAMINE_TRANSPORT	ABAT	CHRM5	CHRNA4	CHRNA6	CHRNB2	CNR1	CXCL12	DRD1	DRD2	DRD3	DRD4	DTNBP1	FGF20	GABBR1	GDNF	GNAT1	GRM2	HTR1B	HTR2A	KCNA2	KPNA4	MAPK15	OPRK1	PARK7	PINK1	PRKCB	PRKN	RAB3B	SLC18A2	SLC22A1	SLC22A2	SLC22A3	SLC29A3	SLC29A4	SLC6A2	SLC6A3	SNCA	SNCG	SYT1	SYT10	SYT11	SYT12	SYT13	SYT15	SYT17	SYT2	SYT3	SYT4
GOBP_DORSAL_AORTA_DEVELOPMENT	https://www.gsea-msigdb.org/gsea/msigdb/human/geneset/GOBP_DORSAL_AORTA_DEVELOPMENT	ACVRL1	BMPR1A	DLL4	ENG	HEY1	HEY2	NGFR	NKX3-1	RBPJ	SRF
GOBP_DORSAL_AORTA_MORPHOGENESIS	https://www.gsea-msigdb.org/gsea/msigdb/human/geneset/GOBP_DORSAL_AORTA_MORPHOGENESIS	ACVRL1	BMPR1A	DLL4	ENG	HEY1	HEY2	RBPJ	SRF
GOBP_DORSAL_ROOT_GANGLION_DEVELOPMENT	https://www.gsea-msigdb.org/gsea/msigdb/human/geneset/GOBP_DORSAL_ROOT_GANGLION_DEVELOPMENT	CTNNB1	NRP1	NRP2	POU4F2	RGS4	TUBB3	UNC5C
GOBP_DORSAL_SPINAL_CORD_DEVELOPMENT	https://www.gsea-msigdb.org/gsea/msigdb/human/geneset/GOBP_DORSAL_SPINAL_CORD_DEVELOPMENT	ASCL1	DAAM2	DRAXIN	DRGX	GDF7	GDNF	GSX1	GSX2	HOXB8	LHX1	LHX3	LHX5	LMO4	MDGA1	PBX3	PROX1	TAL1	UNCX	WNT1	WNT3A
GOBP_DORSAL_VENTRAL_AXIS_SPECIFICATION	https://www.gsea-msigdb.org/gsea/msigdb/human/geneset/GOBP_DORSAL_VENTRAL_AXIS_SPECIFICATION	AXIN1	AXIN2	BMPR1A	CTNNB1	CXXC4	MDFI	PAX6	SFRP1	SMAD2	SMAD6	VAX2	WNT3
GOBP_DORSAL_VENTRAL_NEURAL_TUBE_PATTERNING	https://www.gsea-msigdb.org/gsea/msigdb/human/geneset/GOBP_DORSAL_VENTRAL_NEURAL_TUBE_PATTERNING	BMP4	CDK20	CPLANE2	FKBP8	FOXA1	GLI3	GORAB	GPR161	GSC	MKS1	PRKACA	PRKACB	PSEN1	PTCH1	RNF220	SHH	SMO	SUFU	TBC1D32	TCTN1	TMED2	TULP3	WDR19	WNT3A
GOBP_DORSAL_VENTRAL_PATTERN_FORMATION	https://www.gsea-msigdb.org/gsea/msigdb/human/geneset/GOBP_DORSAL_VENTRAL_PATTERN_FORMATION	ACVR1	ACVRL1	AIDA	ARL13B	ASCL1	AXIN1	AXIN2	BMP1	BMP4	BMPR1A	BMPR1B	CDK20	CER1	CHRD	CPLANE2	CTNNB1	CXXC4	DBX1	DDIT3	DISP1	DLL4	DMRT3	DSCAML1	DYNC2H1	EDN1	EN1	FBXL15	FGF8	FKBP8	FOXA1	FOXG1	FOXN4	GLI1	GLI2	GLI3	GORAB	GPR161	GREM1	GREM2	GSC	GSX2	HHIP	HOXA11	HOXA2	HOXB2	HOXD11	IFT122	IFT172
GOBP_DOSAGE_COMPENSATION	https://www.gsea-msigdb.org/gsea/msigdb/human/geneset/GOBP_DOSAGE_COMPENSATION	BRCA1	CDYL	EIF1	EXOSC10	HCFC1	HNRNPU	JARID2	KANSL1	KANSL2	KANSL3	KAT8	LRIF1	MACROH2A1	MACROH2A2	MCRS1	METTL3	MSL1	MSL2	MSL3	OGT	PCGF3	PCGF5	PHF20	PRDM14	RBM15	RBM15B	RLIM	SMCHD1	SUZ12	TSIX	WDR5	XIST	YTHDC1
GOBP_DOUBLE_STRAND_BREAK_REPAIR	https://www.gsea-msigdb.org/gsea/msigdb/human/geneset/GOBP_DOUBLE_STRAND_BREAK_REPAIR	ABL1	ABRAXAS1	ACTB	ACTL6A	ACTL6B	ACTR2	ACTR5	ACTR8	ANKLE1	AP5S1	AP5Z1	APLF	ARID1A	ARID1B	ARID2	ATM	ATP23	ATR	ATRIP	AUNIP	BABAM1	BABAM2	BCL7A	BCL7B	BCL7C	BLM	BRCA1	BRCA2	BRCC3	BRD7	BRD8	BRIP1	BRME1	C14orf39	CDC45	CDC7	CDCA5	CGAS	CHD4	CHEK1	CHEK2	CIB1	CYREN	DCLRE1A	DCLRE1B	DCLRE1C	DDX1	DDX11
GOBP_DOUBLE_STRAND_BREAK_REPAIR_INVOLVED_IN_MEIOTIC_RECOMBINATION	https://www.gsea-msigdb.org/gsea/msigdb/human/geneset/GOBP_DOUBLE_STRAND_BREAK_REPAIR_INVOLVED_IN_MEIOTIC_RECOMBINATION	BRIP1	BRME1	DMC1	FANCD2	HSF2BP	MAJIN	PRDM9	RAD51	SPO11	TERB1	TERB2
GOBP_DOUBLE_STRAND_BREAK_REPAIR_VIA_BREAK_INDUCED_REPLICATION	https://www.gsea-msigdb.org/gsea/msigdb/human/geneset/GOBP_DOUBLE_STRAND_BREAK_REPAIR_VIA_BREAK_INDUCED_REPLICATION	CDC45	CDC7	GINS2	GINS4	MCM2	MCM3	MCM4	MCM5	MCM6	MCM7	MCMDC2	MUS81
GOBP_DOUBLE_STRAND_BREAK_REPAIR_VIA_CLASSICAL_NONHOMOLOGOUS_END_JOINING	https://www.gsea-msigdb.org/gsea/msigdb/human/geneset/GOBP_DOUBLE_STRAND_BREAK_REPAIR_VIA_CLASSICAL_NONHOMOLOGOUS_END_JOINING	ERCC6	ERCC8	LIG4	UVRAG	XRCC6	ZBTB7A
GOBP_DOUBLE_STRAND_BREAK_REPAIR_VIA_NONHOMOLOGOUS_END_JOINING	https://www.gsea-msigdb.org/gsea/msigdb/human/geneset/GOBP_DOUBLE_STRAND_BREAK_REPAIR_VIA_NONHOMOLOGOUS_END_JOINING	ACTR2	APLF	ATM	ATP23	AUNIP	CYREN	DCLRE1A	DCLRE1B	DCLRE1C	DEK	DNTT	ERCC1	ERCC4	ERCC6	ERCC8	HELQ	HMCES	HMGA2	HMGB1	HMGB2	HSF1	IFFO1	KDM2A	KDM4D	KMT5B	KMT5C	LIG4	MAD2L2	MLH1	MRE11	MRNIP	NHEJ1	NSD2	NSMCE2	NUDT16L1	PARP3	PAXX	PNKP	POLA1	POLB	POLL	POLM	POLQ	POT1	PRKDC	PRPF19	PSMD14	RIF1
GOBP_DOUBLE_STRAND_BREAK_REPAIR_VIA_SINGLE_STRAND_ANNEALING	https://www.gsea-msigdb.org/gsea/msigdb/human/geneset/GOBP_DOUBLE_STRAND_BREAK_REPAIR_VIA_SINGLE_STRAND_ANNEALING	HELQ	OGG1	RAD52	RBBP8	RNF138	SLX1A	SLX1B	SLX4
GOBP_DOUBLE_STRAND_BREAK_REPAIR_VIA_SYNTHESIS_DEPENDENT_STRAND_ANNEALING	https://www.gsea-msigdb.org/gsea/msigdb/human/geneset/GOBP_DOUBLE_STRAND_BREAK_REPAIR_VIA_SYNTHESIS_DEPENDENT_STRAND_ANNEALING	DMC1	FANCM	HELQ	RAD51	RAD51C	RAD52	RAD54L	XRCC3
GOBP_DRINKING_BEHAVIOR	https://www.gsea-msigdb.org/gsea/msigdb/human/geneset/GOBP_DRINKING_BEHAVIOR	ACE2	APLN	DRD2	EN1	HTR1B	MMP17	REN	SLC24A4	TACR1	UCN
GOBP_DTMP_METABOLIC_PROCESS	https://www.gsea-msigdb.org/gsea/msigdb/human/geneset/GOBP_DTMP_METABOLIC_PROCESS	DUT	NT5C	SHMT1	TYMP	TYMS	UPP1
GOBP_DTTP_METABOLIC_PROCESS	https://www.gsea-msigdb.org/gsea/msigdb/human/geneset/GOBP_DTTP_METABOLIC_PROCESS	CMPK2	DCTPP1	DTYMK	TBPL1	TYMS
GOBP_DUCTUS_ARTERIOSUS_CLOSURE	https://www.gsea-msigdb.org/gsea/msigdb/human/geneset/GOBP_DUCTUS_ARTERIOSUS_CLOSURE	FOXF1	HPGD	MYOCD	STRA6	TFAP2B
GOBP_DUMP_CATABOLIC_PROCESS	https://www.gsea-msigdb.org/gsea/msigdb/human/geneset/GOBP_DUMP_CATABOLIC_PROCESS	DPYD	DPYS	NT5C	NT5M	UPB1	UPP1
GOBP_DUMP_METABOLIC_PROCESS	https://www.gsea-msigdb.org/gsea/msigdb/human/geneset/GOBP_DUMP_METABOLIC_PROCESS	DPYD	DPYS	DUT	ENSG00000276759	NT5C	NT5M	UPB1	UPP1
GOBP_D_AMINO_ACID_TRANSPORT	https://www.gsea-msigdb.org/gsea/msigdb/human/geneset/GOBP_D_AMINO_ACID_TRANSPORT	GFAP	NTSR1	SLC1A1	SLC1A2	SLC1A3	SLC7A10
GOBP_D_ASPARTATE_IMPORT_ACROSS_PLASMA_MEMBRANE	https://www.gsea-msigdb.org/gsea/msigdb/human/geneset/GOBP_D_ASPARTATE_IMPORT_ACROSS_PLASMA_MEMBRANE	GFAP	NTSR1	SLC1A1	SLC1A2	SLC1A3
GOBP_EARLY_ENDOSOME_TO_GOLGI_TRANSPORT	https://www.gsea-msigdb.org/gsea/msigdb/human/geneset/GOBP_EARLY_ENDOSOME_TO_GOLGI_TRANSPORT	BLTP3B	EHD3	LMAN1	RAB6A	RBSN	SNX1	SNX2	SNX8	STX10	STX5	SURF4	TMED9	TRAPPC10
GOBP_EARLY_ENDOSOME_TO_RECYCLING_ENDOSOME_TRANSPORT	https://www.gsea-msigdb.org/gsea/msigdb/human/geneset/GOBP_EARLY_ENDOSOME_TO_RECYCLING_ENDOSOME_TRANSPORT	CORO1A	DNAJC13	MYO1D	RAB11A	RAB11FIP3	SORL1
GOBP_EAR_DEVELOPMENT	https://www.gsea-msigdb.org/gsea/msigdb/human/geneset/GOBP_EAR_DEVELOPMENT	ADAM10	ADGRV1	AHI1	ALDH1A3	ANKRD24	ANP32B	ATG4B	ATG5	ATOH1	ATP6V1B1	ATP8A2	ATP8B1	BCL2	BCL2L11	BCR	BLOC1S5	BMP2	BMP4	BMP5	BMPER	C1QTNF5	CALB1	CCM2	CCNA2	CDH23	CDKN1B	CEBPA	CEBPD	CECR2	CEP290	CHD7	CHRNA10	CHRNA9	CLRN1	CLRN2	COL11A1	COL2A1	CTHRC1	CYTL1	DCANP1	DCHS1	DDR1	DLL1	DLX5	DLX6	DVL1	DVL2	ECE1
GOBP_EAR_MORPHOGENESIS	https://www.gsea-msigdb.org/gsea/msigdb/human/geneset/GOBP_EAR_MORPHOGENESIS	ALDH1A3	ANKRD24	ATOH1	ATP6V1B1	ATP8A2	BCR	BLOC1S5	CDH23	CEP290	CHD7	CHRNA10	CHRNA9	CLRN1	CLRN2	COL11A1	COL2A1	CTHRC1	DCANP1	DLX5	DLX6	DVL1	DVL2	EDN1	EDNRA	EPHB2	EYA1	FGF10	FGF8	FGF9	FGFR2	FOXG1	FOXI1	FRZB	FZD2	FZD3	FZD6	GATA2	GATA3	GBX2	GJB6	GRHL3	GRXCR2	GSC	HESX1	HMX2	HMX3	HOXA1	HOXA2
GOBP_EATING_BEHAVIOR	https://www.gsea-msigdb.org/gsea/msigdb/human/geneset/GOBP_EATING_BEHAVIOR	ACE	ADORA2A	ADRB3	AGRP	ATP8A2	BBIP1	BBS12	BSX	CCK	CNTN2	CPT1A	GDF15	GFRAL	GHRL	GHSR	HCRT	IAPP	LEP	MC4R	NMUR2	NPSR1	NPY5R	OPRD1	OPRK1	OPRL1	OXTR	P2RY1	PRLH	RMI1	SLC24A4	STAT3	TACR1	TH	TMEM18	TRH	TTC21B	UCHL1
GOBP_ECTODERMAL_CELL_DIFFERENTIATION	https://www.gsea-msigdb.org/gsea/msigdb/human/geneset/GOBP_ECTODERMAL_CELL_DIFFERENTIATION	EDA2R	ETS2	FZD7	ITGA6	ITGAM	MIR145	VPS52
GOBP_ECTODERMAL_PLACODE_DEVELOPMENT	https://www.gsea-msigdb.org/gsea/msigdb/human/geneset/GOBP_ECTODERMAL_PLACODE_DEVELOPMENT	CTNNB1	DKK4	EDA	FOXI3	FRS2	HDAC1	HDAC2	NRG3	NRP1	PROX1	SIX1	SIX4	TBX2	TBX3
GOBP_ECTODERM_DEVELOPMENT	https://www.gsea-msigdb.org/gsea/msigdb/human/geneset/GOBP_ECTODERM_DEVELOPMENT	AMER2	BMPR1A	CTNNB1	EDA2R	EPB41L5	ETS2	FZD7	GRHL3	ITGA6	ITGAM	KRT6B	LHX1	MIR145	NF2	SHH	SMURF1	STX2	TPT1	VAX2	VPS52	ZBTB17	ZBTB7B
GOBP_ECTOPIC_GERM_CELL_PROGRAMMED_CELL_DEATH	https://www.gsea-msigdb.org/gsea/msigdb/human/geneset/GOBP_ECTOPIC_GERM_CELL_PROGRAMMED_CELL_DEATH	BAX	BCL2L1	CASP2	DDB1	IL1A	IL1B	KIT	KITLG	MAEL	PRKDC	SOD1	SYCE3	SYCP2	TEX11	TOPAZ1	UBE2B	UNC5C	YBX3
GOBP_EGG_ACTIVATION	https://www.gsea-msigdb.org/gsea/msigdb/human/geneset/GOBP_EGG_ACTIVATION	ASTL	MYH9	NLRP5	NPR2	PLAT	PLCB1	PLCZ1	WBP2NL	ZP1	ZP2	ZP4
GOBP_ELASTIC_FIBER_ASSEMBLY	https://www.gsea-msigdb.org/gsea/msigdb/human/geneset/GOBP_ELASTIC_FIBER_ASSEMBLY	ATP7A	COL3A1	EFEMP2	EMILIN1	FBLN5	LOX	MFAP4	MYH11	THSD4	TNXB
GOBP_ELASTIN_CATABOLIC_PROCESS	https://www.gsea-msigdb.org/gsea/msigdb/human/geneset/GOBP_ELASTIN_CATABOLIC_PROCESS	CELA1	CST3	CTSL	MIR181B1	MMP12
GOBP_ELASTIN_METABOLIC_PROCESS	https://www.gsea-msigdb.org/gsea/msigdb/human/geneset/GOBP_ELASTIN_METABOLIC_PROCESS	ATP7A	CELA1	CST3	CTSL	HBEGF	HIF1A	LEP	MIR181B1	MMP12
GOBP_ELECTRON_TRANSPORT_CHAIN	https://www.gsea-msigdb.org/gsea/msigdb/human/geneset/GOBP_ELECTRON_TRANSPORT_CHAIN	ADH5	AFG1L	AIFM2	AKR1B1	AKR1C4	AKR7A2	AKR7A3	ALDH2	ALDH4A1	AOC2	ASPH	BID	CCNB1	CDK1	CHCHD2	CIAPIN1	COA6	COQ9	COX11	COX15	COX4I1	COX4I2	COX5A	COX5B	COX6A1	COX6A2	COX6B1	COX6C	COX7A1	COX7A2	COX7A2L	COX7A2P2	COX7B	COX7B2	COX7C	COX8A	COX8C	CYB561	CYB5A	CYBA	CYBB	CYC1	CYCS	CYP19A1	CYP1A2	DEGS1	DGUOK	DHRS2
GOBP_EMBRYONIC_APPENDAGE_MORPHOGENESIS	https://www.gsea-msigdb.org/gsea/msigdb/human/geneset/GOBP_EMBRYONIC_APPENDAGE_MORPHOGENESIS	ACD	AFF3	ALDH1A2	ALX3	ALX4	B9D1	BAX	BCL2L11	BMP4	BMP7	BMPR1A	BPNT2	C2CD3	CACNA1C	CHD7	CHST11	CRABP2	CREBBP	CTNNB1	CYP26B1	DKK1	DLX5	DLX6	DYNC2H1	ECE1	EN1	FBN2	FBXW4	FGF4	FGF8	FGF9	FLVCR1	FRAS1	FREM2	FZD6	GDF5	GLI3	GNA12	GPC3	GREM1	GRHL2	HAND2	HDAC1	HDAC2	HOXA10	HOXA11	HOXA13	HOXA9
GOBP_EMBRYONIC_AXIS_SPECIFICATION	https://www.gsea-msigdb.org/gsea/msigdb/human/geneset/GOBP_EMBRYONIC_AXIS_SPECIFICATION	BASP1	C2CD3	CHRDL1	COBL	CTNNB1	CXXC4	DCANP1	EPB41L5	FRS2	FZD5	GDF3	HOXD8	LHX1	MESP1	MESP2	NEUROG1	NRARP	PCSK6	PLD6	PTCH1	RIPPLY1	RIPPLY2	SMAD2	SMAD4	SMAD6	STIL	TASOR	TBX3	TBX6	TBXT	TDGF1	TDRD1	TDRD5	TDRD6	TDRD7	TDRKH	TIFAB	TMED2	WNT1	WNT5A	WNT7A	WT1
GOBP_EMBRYONIC_BODY_MORPHOGENESIS	https://www.gsea-msigdb.org/gsea/msigdb/human/geneset/GOBP_EMBRYONIC_BODY_MORPHOGENESIS	CDON	CLASP1	CLASP2	DAG1	FUZ	GREM2	IFT122	MAB21L2	PHLDB1	PHLDB2	ZNF281
GOBP_EMBRYONIC_BRAIN_DEVELOPMENT	https://www.gsea-msigdb.org/gsea/msigdb/human/geneset/GOBP_EMBRYONIC_BRAIN_DEVELOPMENT	CC2D2A	CDC40	CDK20	CTNNB1	EN1	EN2	IFT140	MED12	MFSD2A	MKS1	PPIL1	PRICKLE1	RNF112	RPL10	TBC1D23	TRA2B	TUBB2B	WNT1
GOBP_EMBRYONIC_CAMERA_TYPE_EYE_DEVELOPMENT	https://www.gsea-msigdb.org/gsea/msigdb/human/geneset/GOBP_EMBRYONIC_CAMERA_TYPE_EYE_DEVELOPMENT	ALDH1A2	ALDH1A3	BMP7	CDK20	CITED2	FGF10	FOXF2	FRS2	FZD5	HIPK1	HIPK2	IFT140	IFT172	IHH	KDM2B	NES	PAX2	PAX6	PHACTR4	PPP1R13L	PROX1	RARA	RARG	RDH10	SIX3	SOX11	SP3	STRA6	TBX2	TFAP2A	TH	TULP3	TWIST1	WDR19	WNT16	WNT5A	ZEB1
GOBP_EMBRYONIC_CAMERA_TYPE_EYE_FORMATION	https://www.gsea-msigdb.org/gsea/msigdb/human/geneset/GOBP_EMBRYONIC_CAMERA_TYPE_EYE_FORMATION	ALDH1A3	FRS2	PAX2	PHACTR4	PROX1	SOX11	STRA6	TFAP2A	TWIST1	WNT16	WNT5A
GOBP_EMBRYONIC_CAMERA_TYPE_EYE_MORPHOGENESIS	https://www.gsea-msigdb.org/gsea/msigdb/human/geneset/GOBP_EMBRYONIC_CAMERA_TYPE_EYE_MORPHOGENESIS	ALDH1A3	BMP7	CITED2	FOXF2	FRS2	FZD5	HIPK1	HIPK2	IFT172	IHH	KDM2B	PAX2	PAX6	PHACTR4	PROX1	SIX3	SOX11	SP3	STRA6	TBX2	TFAP2A	TH	TWIST1	WNT16	WNT5A	ZEB1
GOBP_EMBRYONIC_CLEAVAGE	https://www.gsea-msigdb.org/gsea/msigdb/human/geneset/GOBP_EMBRYONIC_CLEAVAGE	AATF	CUL3	ERCC2	PADI6	PIK3CB	TOP1	TOP2A	TPRA1
GOBP_EMBRYONIC_CRANIAL_SKELETON_MORPHOGENESIS	https://www.gsea-msigdb.org/gsea/msigdb/human/geneset/GOBP_EMBRYONIC_CRANIAL_SKELETON_MORPHOGENESIS	BMP4	CHST11	DLX2	EIF4A3	FGF8	FGFR2	FOXC2	GLI3	GRHL2	HOXA1	HOXA2	IFT140	IRX5	LHX1	MED12	MMP14	MMP16	MTHFD1	MTHFD1L	NDST1	NIPBL	NODAL	PAX5	PDGFRA	PRRX1	RDH10	RUNX2	SETD2	SIX1	SIX2	SIX4	SLC39A1	SLC39A3	SMAD2	SMAD3	TBX1	TBX15	TFAP2A	TGFB3	TGFBR1	TGFBR2	TULP3	TWIST1	WDR19	WNT9B
GOBP_EMBRYONIC_DIGESTIVE_TRACT_DEVELOPMENT	https://www.gsea-msigdb.org/gsea/msigdb/human/geneset/GOBP_EMBRYONIC_DIGESTIVE_TRACT_DEVELOPMENT	ADA	ALDH1A2	CXCL8	FGF10	FGF9	FGFR2	FOXF1	FOXF2	GLI2	GLI3	HLX	HNF1B	ID2	IHH	NIPBL	OVOL2	PCSK5	PDGFRA	PKDCC	RARB	RARRES2	RBPMS2	SALL1	SCT	SHH	SHOX2	SIX2	SOX11	STRA6	TCF21	TGFB2	TNF	VPS52
GOBP_EMBRYONIC_DIGESTIVE_TRACT_MORPHOGENESIS	https://www.gsea-msigdb.org/gsea/msigdb/human/geneset/GOBP_EMBRYONIC_DIGESTIVE_TRACT_MORPHOGENESIS	FGF10	FGFR2	FOXF1	GLI3	HLX	HNF1B	ID2	IHH	NIPBL	OVOL2	PDGFRA	RBPMS2	SHH	SHOX2	SIX2	SOX11	TCF21
GOBP_EMBRYONIC_DIGIT_MORPHOGENESIS	https://www.gsea-msigdb.org/gsea/msigdb/human/geneset/GOBP_EMBRYONIC_DIGIT_MORPHOGENESIS	ALX4	B9D1	BAX	BCL2L11	BMP4	BMPR1A	BPNT2	C2CD3	CHST11	CREBBP	CTNNB1	ECE1	FLVCR1	FREM2	FZD6	GLI3	GNA12	GRHL2	HAND2	HDAC1	HDAC2	HOXA11	HOXC11	HOXD12	HOXD13	IFT140	IFT52	IHH	INTU	LMBR1	LNPK	LRP4	LRP5	MAP3K20	MKS1	MSX1	MSX2	NOG	NOTCH1	OSR1	OSR2	PRICKLE1	SALL1	SFRP2	SHH	SMAD4	TBC1D32	TBX2
GOBP_EMBRYONIC_EYE_MORPHOGENESIS	https://www.gsea-msigdb.org/gsea/msigdb/human/geneset/GOBP_EMBRYONIC_EYE_MORPHOGENESIS	ALDH1A3	BMP7	CITED2	EFEMP1	FBN1	FBN2	FOXF2	FOXL2	FRS2	FZD5	HIPK1	HIPK2	IFT172	IHH	KDM2B	MFAP2	MFAP5	PAX2	PAX6	PHACTR4	PROX1	RARB	RARG	SIX3	SOX11	SP3	STRA6	TBX2	TFAP2A	TH	TWIST1	VAX2	WNT16	WNT5A	ZEB1
GOBP_EMBRYONIC_FORELIMB_MORPHOGENESIS	https://www.gsea-msigdb.org/gsea/msigdb/human/geneset/GOBP_EMBRYONIC_FORELIMB_MORPHOGENESIS	ALDH1A2	ALX3	ALX4	CACNA1C	CRABP2	CTNNB1	EN1	HOXA11	HOXA13	HOXA9	HOXD9	IFT122	LNPK	MSX1	MSX2	NIPBL	OSR1	OSR2	RDH10	RECK	RPGRIP1L	RSPO2	RUNX2	SHH	SHOX2	TBX3	TBX5	TFAP2A	TP63	TWIST1	WNT3	WNT7A	ZNF358
GOBP_EMBRYONIC_HEART_TUBE_DEVELOPMENT	https://www.gsea-msigdb.org/gsea/msigdb/human/geneset/GOBP_EMBRYONIC_HEART_TUBE_DEVELOPMENT	ACVR1	AHI1	APELA	APLNR	ARL13B	ASB2	BBS5	BBS7	C2CD3	CCDC103	CCDC39	CCDC40	CDC42	CITED2	CLUAP1	CTNNB1	DLL1	DNAAF1	DVL1	DVL2	ECE1	EDN1	EDNRA	ENG	FGF8	FOLR1	FOXC1	FOXC2	FOXH1	FOXN4	GATA4	HAND1	HAND2	HES1	HIF1A	IFT122	IFT172	IFT52	IFT57	IHH	LBX1	MED1	MEF2C	MEGF8	MESP1	MIB1	MICAL2	MKKS
GOBP_EMBRYONIC_HEART_TUBE_LEFT_RIGHT_PATTERN_FORMATION	https://www.gsea-msigdb.org/gsea/msigdb/human/geneset/GOBP_EMBRYONIC_HEART_TUBE_LEFT_RIGHT_PATTERN_FORMATION	CITED2	IFT122	MEGF8	NKX2-5	PIFO	PITX2
GOBP_EMBRYONIC_HEART_TUBE_MORPHOGENESIS	https://www.gsea-msigdb.org/gsea/msigdb/human/geneset/GOBP_EMBRYONIC_HEART_TUBE_MORPHOGENESIS	ACVR1	AHI1	APLNR	ARL13B	ASB2	BBS5	BBS7	C2CD3	CCDC103	CCDC39	CCDC40	CITED2	CLUAP1	DLL1	DNAAF1	DVL1	DVL2	ENG	FGF8	FOLR1	FOXH1	FOXN4	GATA4	HAND1	HAND2	HES1	HIF1A	IFT172	IFT52	IFT57	IHH	LBX1	MEF2C	MEGF8	MESP1	MIB1	MICAL2	MKKS	NDRG4	NKX2-5	NODAL	NOTCH1	NOTCH2	NOTO	NPHP3	OVOL2	PKD2	PSEN1
GOBP_EMBRYONIC_HEMOPOIESIS	https://www.gsea-msigdb.org/gsea/msigdb/human/geneset/GOBP_EMBRYONIC_HEMOPOIESIS	ATF4	CCDC134	FLT3LG	GATA1	GATA2	GATA3	HIF1A	HSCB	IL3	KDR	KIT	KITLG	KMT2A	MED1	PBX1	SH2B3	STK3	STK4	TAL1	TGFBR2	THOC5	TPO	VEGFA	ZFPM1
GOBP_EMBRYONIC_HINDLIMB_MORPHOGENESIS	https://www.gsea-msigdb.org/gsea/msigdb/human/geneset/GOBP_EMBRYONIC_HINDLIMB_MORPHOGENESIS	AFF3	ALX3	ALX4	BMP4	CHD7	CTNNB1	FGF4	FGF8	GPC3	MED1	MSX1	MSX2	NOTCH1	OSR1	OSR2	PITX1	RARB	RARG	RPGRIP1L	RSPO2	SHH	TBX3	TBX4	TP63	TWIST1	WNT3	WNT7A	ZBTB16
GOBP_EMBRYONIC_MORPHOGENESIS	https://www.gsea-msigdb.org/gsea/msigdb/human/geneset/GOBP_EMBRYONIC_MORPHOGENESIS	ABL1	ACD	ACVR1	ACVR2A	ACVR2B	ADIPOQ	ADM	AFF3	AHDC1	AHI1	ALDH1A2	ALDH1A3	ALX1	ALX3	ALX4	AMOT	ANKRD24	APAF1	APELA	APLN	APLNR	APOA1	AR	ARFRP1	ARHGAP35	ARL13B	ARMC5	ASB2	ATOH1	ATOH8	ATP6V1B1	ATP8A2	AXIN1	B9D1	BAX	BBS4	BBS5	BBS7	BCL10	BCL2L11	BCR	BLOC1S5	BMI1	BMP4	BMP5	BMP7	BMPR1A	BMPR2
GOBP_EMBRYONIC_NEUROCRANIUM_MORPHOGENESIS	https://www.gsea-msigdb.org/gsea/msigdb/human/geneset/GOBP_EMBRYONIC_NEUROCRANIUM_MORPHOGENESIS	FGF8	GLI3	HOXA1	MED12	MTHFD1	MTHFD1L	NDST1	TGFB3	TULP3
GOBP_EMBRYONIC_ORGAN_DEVELOPMENT	https://www.gsea-msigdb.org/gsea/msigdb/human/geneset/GOBP_EMBRYONIC_ORGAN_DEVELOPMENT	A2M	ACVR1	ADA	ADM	AHI1	AKT1	ALDH1A2	ALDH1A3	ALX1	ALX3	ALX4	ANKRD24	APELA	APLNR	ARID2	ARL13B	ARNT	ASB2	ASCL2	ATF4	ATOH1	ATP6V1B1	ATP8A2	BBS5	BBS7	BCR	BIRC6	BLOC1S5	BMI1	BMP4	BMP5	BMP7	BMPR1A	BPTF	C2CD3	CASP8	CC2D2A	CCDC103	CCDC134	CCDC39	CCDC40	CCN1	CDC40	CDC42	CDH23	CDK20	CDKN1C	CDX2
GOBP_EMBRYONIC_ORGAN_MORPHOGENESIS	https://www.gsea-msigdb.org/gsea/msigdb/human/geneset/GOBP_EMBRYONIC_ORGAN_MORPHOGENESIS	ACVR1	AHI1	ALDH1A3	ALX1	ALX3	ALX4	ANKRD24	APLNR	ARL13B	ASB2	ATOH1	ATP6V1B1	ATP8A2	BBS5	BBS7	BCR	BLOC1S5	BMI1	BMP4	BMP7	C2CD3	CCDC103	CCDC39	CCDC40	CDH23	CEP290	CHD7	CHRNA10	CHRNA9	CHST11	CITED2	CLRN1	CLRN2	CLUAP1	COL11A1	COL2A1	CRB2	CTHRC1	CTNNB1	DCANP1	DLG1	DLL1	DLX2	DLX5	DLX6	DNAAF1	DSCAML1	DVL1
GOBP_EMBRYONIC_PATTERN_SPECIFICATION	https://www.gsea-msigdb.org/gsea/msigdb/human/geneset/GOBP_EMBRYONIC_PATTERN_SPECIFICATION	BASP1	BMP7	C2CD3	CHRDL1	COBL	CTNNB1	CXXC4	DCANP1	DISP1	DLL1	DOP1B	EFNB1	EPB41L5	ERBB4	FGF10	FGFR2	FRS2	FZD5	GDF3	HOXD8	IHH	LAMA5	LHX1	MEIS1	MEIS2	MEIS3	MEIS3P1	MEOX1	MEOX2	MESP1	MESP2	NEUROG1	NODAL	NOTO	NRARP	NRP1	NRP2	OOEP	PCSK6	PGAP1	PLD6	PTCH1	RIPPLY1	RIPPLY2	RIPPLY3	SATB2	SEMA3F	SHH
GOBP_EMBRYONIC_PLACENTA_DEVELOPMENT	https://www.gsea-msigdb.org/gsea/msigdb/human/geneset/GOBP_EMBRYONIC_PLACENTA_DEVELOPMENT	ADM	AKT1	ARNT	ASCL2	BIRC6	BMP5	BMP7	BPTF	CASP8	CCN1	CDKN1C	CDX2	CDX4	CEBPA	CEBPB	CITED1	CITED2	CSF2	DNAJB6	E2F7	E2F8	EGFR	EGLN1	EOMES	EPAS1	ESRRB	FBXW8	FGFR2	FZD5	GATA2	GCM1	GGNBP2	GJB5	GRB2	GRHL2	HAND1	HECTD1	HES1	HEY1	HEY2	HIF1A	HS6ST1	IGF2	IL10	JUNB	KRT19	KRT8	LEF1
GOBP_EMBRYONIC_PLACENTA_MORPHOGENESIS	https://www.gsea-msigdb.org/gsea/msigdb/human/geneset/GOBP_EMBRYONIC_PLACENTA_MORPHOGENESIS	ADM	BMP5	BMP7	CCN1	CDKN1C	DNAJB6	FGFR2	FZD5	GCM1	GJB5	GRB2	GRHL2	IGF2	IL10	LEF1	NCOA1	RSPO3	SETD2	SOCS3	SPINT1	SPINT2	ST14	TMED2	TRIM28	WNT7B	ZFP36L1	ZNF568
GOBP_EMBRYONIC_PROCESS_INVOLVED_IN_FEMALE_PREGNANCY	https://www.gsea-msigdb.org/gsea/msigdb/human/geneset/GOBP_EMBRYONIC_PROCESS_INVOLVED_IN_FEMALE_PREGNANCY	ACSL4	CITED2	EMP2	JUNB	NODAL	SP3	TLE6
GOBP_EMBRYONIC_RETINA_MORPHOGENESIS_IN_CAMERA_TYPE_EYE	https://www.gsea-msigdb.org/gsea/msigdb/human/geneset/GOBP_EMBRYONIC_RETINA_MORPHOGENESIS_IN_CAMERA_TYPE_EYE	CDON	HIPK1	HIPK2	LHX1	PROX1	RBP4
GOBP_EMBRYONIC_SKELETAL_JOINT_DEVELOPMENT	https://www.gsea-msigdb.org/gsea/msigdb/human/geneset/GOBP_EMBRYONIC_SKELETAL_JOINT_DEVELOPMENT	BMP4	BMP7	COL2A1	CTNNB1	EXT1	HOXA11	HOXC11	HYAL1	IHH	NOG	OSR1	OSR2	SHOX2	SLC2A10	WNT9A
GOBP_EMBRYONIC_SKELETAL_JOINT_MORPHOGENESIS	https://www.gsea-msigdb.org/gsea/msigdb/human/geneset/GOBP_EMBRYONIC_SKELETAL_JOINT_MORPHOGENESIS	BMP4	BMP7	COL2A1	CTNNB1	HOXA11	HOXC11	HYAL1	NOG	OSR1	OSR2	SHOX2
GOBP_EMBRYONIC_SKELETAL_SYSTEM_DEVELOPMENT	https://www.gsea-msigdb.org/gsea/msigdb/human/geneset/GOBP_EMBRYONIC_SKELETAL_SYSTEM_DEVELOPMENT	ACVR2A	ALX1	ALX3	ALX4	BMI1	BMP4	BMP7	CDK20	CHST11	COL11A1	COL1A1	COL2A1	CTNNB1	DEAF1	DLG1	DLX1	DLX2	DMRT2	DSCAML1	DYNC2I1	EDNRA	EIF4A3	EXT1	EYA1	FGF8	FGF9	FGFR2	FLVCR1	FOXC2	FUZ	GLI3	GRHL2	GSC	HAND2	HOXA1	HOXA11	HOXA2	HOXA3	HOXA4	HOXA5	HOXA6	HOXA7	HOXA9	HOXB1	HOXB2	HOXB3	HOXB4	HOXB5
GOBP_EMBRYONIC_SKELETAL_SYSTEM_MORPHOGENESIS	https://www.gsea-msigdb.org/gsea/msigdb/human/geneset/GOBP_EMBRYONIC_SKELETAL_SYSTEM_MORPHOGENESIS	ALX1	ALX3	ALX4	BMI1	BMP4	BMP7	CHST11	COL11A1	COL2A1	CTNNB1	DLG1	DLX2	DSCAML1	DYNC2I1	EIF4A3	EYA1	FGF8	FGFR2	FLVCR1	FOXC2	FUZ	GLI3	GRHL2	GSC	HOXA1	HOXA11	HOXA2	HOXA3	HOXA4	HOXA5	HOXA7	HOXA9	HOXB1	HOXB2	HOXB3	HOXB4	HOXB5	HOXB6	HOXB7	HOXB8	HOXB9	HOXC11	HOXC4	HOXC9	HOXD10	HOXD3	HOXD4	HOXD9
GOBP_EMBRYONIC_VISCEROCRANIUM_MORPHOGENESIS	https://www.gsea-msigdb.org/gsea/msigdb/human/geneset/GOBP_EMBRYONIC_VISCEROCRANIUM_MORPHOGENESIS	CHST11	FOXC2	HOXA2	LHX1	MTHFD1	MTHFD1L	NDST1	NIPBL	RDH10	TBX1
GOBP_EMBRYO_DEVELOPMENT	https://www.gsea-msigdb.org/gsea/msigdb/human/geneset/GOBP_EMBRYO_DEVELOPMENT	A2M	AATF	ABI1	ABL1	ACD	ACE	ACSL4	ACTL6A	ACTR5	ACTR8	ACVR1	ACVR1B	ACVR1C	ACVR2A	ACVR2B	ACVRL1	ADA	ADAM10	ADAMTS3	ADCY9	ADGRF5	ADIPOQ	ADM	AFF3	AGBL4	AHDC1	AHI1	AKAP3	AKIRIN2	AKT1	ALDH1A2	ALDH1A3	ALKBH1	ALX1	ALX3	ALX4	AMBRA1	AMOT	ANGPT1	ANKRD24	ANKS6	APAF1	APBA1	APBA2	APBA3	APELA	APLN	APLNR
GOBP_EMBRYO_DEVELOPMENT_ENDING_IN_BIRTH_OR_EGG_HATCHING	https://www.gsea-msigdb.org/gsea/msigdb/human/geneset/GOBP_EMBRYO_DEVELOPMENT_ENDING_IN_BIRTH_OR_EGG_HATCHING	ABI1	ABL1	ACE	ACSL4	ACTL6A	ACVR1	ACVR1B	ACVR1C	ACVR2A	ACVRL1	ADA	ADAM10	ADAMTS3	ADCY9	ADGRF5	ADM	AGBL4	AKAP3	AKIRIN2	AKT1	ALDH1A2	ALKBH1	ALX1	ALX3	ALX4	AMBRA1	AMOT	ANGPT1	ANKS6	APAF1	APBA1	APBA2	APBA3	APOB	AR	ARHGAP35	ARHGDIG	ARL13B	ARMC5	ARNT	ARNT2	ASCL2	ASF1B	ATF2	ATM	ATP11A	ATP6AP2	ATP7A
GOBP_EMBRYO_IMPLANTATION	https://www.gsea-msigdb.org/gsea/msigdb/human/geneset/GOBP_EMBRYO_IMPLANTATION	A1CF	ACOD1	ACVR1B	ACVR1C	AGO2	APELA	APLF	ARHGDIB	BSG	C1QBP	CALCA	CALR	DDR1	EMP2	EPO	FBLN1	FKBP4	FUT7	GJA1	H3-3A	H3-3B	HMX3	HSPG2	IGFBP7	IL1B	INTS1	ITGB3	ITGB4	LIF	MIR15B	MIR16-1	MIR21	MMP2	MMP9	NODAL	PCSK5	POLR1B	PPARD	PRDM14	PRLR	PTGS2	RECK	RPL29	SCGB1A1	SMURF2	SOD1	SPP1	STC1
GOBP_ENAMEL_MINERALIZATION	https://www.gsea-msigdb.org/gsea/msigdb/human/geneset/GOBP_ENAMEL_MINERALIZATION	AMELX	AMELY	AMTN	CFTR	CNNM4	DMP1	ENAM	FAM20A	FAM20C	ITGB6	MMP20	MSX2	NECTIN1	ODAPH	PPARA	SLC24A4	SLC4A2	STIM1	TBX1	TCIRG1	WDR72
GOBP_ENDOCANNABINOID_SIGNALING_PATHWAY	https://www.gsea-msigdb.org/gsea/msigdb/human/geneset/GOBP_ENDOCANNABINOID_SIGNALING_PATHWAY	ABHD6	ALOX15B	CAMK2A	DAGLA	MGLL
GOBP_ENDOCARDIAL_CELL_DIFFERENTIATION	https://www.gsea-msigdb.org/gsea/msigdb/human/geneset/GOBP_ENDOCARDIAL_CELL_DIFFERENTIATION	ACVR1	NOTCH1	NRG1	SMAD4	SOX17	SOX18
GOBP_ENDOCARDIAL_CUSHION_DEVELOPMENT	https://www.gsea-msigdb.org/gsea/msigdb/human/geneset/GOBP_ENDOCARDIAL_CUSHION_DEVELOPMENT	ACVR1	ACVRL1	ADAMTS5	APC	APLNR	BMP2	BMP4	BMP5	BMP7	BMPR1A	BMPR2	CITED2	CPLANE2	CRELD1	DCHS1	DKK1	ENG	ERBB3	FGF8	FOXF1	GATA4	GATA5	HEY1	HEY2	HEYL	ISL1	JAG1	MDM2	MDM4	MSX1	MSX2	NOG	NOS3	NOTCH1	RBM24	RBPJ	ROBO1	ROBO2	SMAD2	SMAD4	SNAI1	SNAI2	SOX9	TBX2	TBX20	TBX3	TBX5	TGFB1
GOBP_ENDOCARDIAL_CUSHION_FORMATION	https://www.gsea-msigdb.org/gsea/msigdb/human/geneset/GOBP_ENDOCARDIAL_CUSHION_FORMATION	ACVR1	APLNR	BMP2	BMP4	BMP5	BMP7	BMPR1A	DCHS1	ENG	FGF8	HEY2	HEYL	MSX1	MSX2	NOG	NOTCH1	RBPJ	ROBO1	ROBO2	SMAD4	SNAI1	SNAI2	TBX2	TBX20	TBX3	TGFB1	TGFB2	TGFB3	TGFBR1	TGFBR2	TMEM100
GOBP_ENDOCARDIAL_CUSHION_FUSION	https://www.gsea-msigdb.org/gsea/msigdb/human/geneset/GOBP_ENDOCARDIAL_CUSHION_FUSION	ACVR1	CPLANE2	GATA5	TGFB2	TGFBR2
GOBP_ENDOCARDIAL_CUSHION_MORPHOGENESIS	https://www.gsea-msigdb.org/gsea/msigdb/human/geneset/GOBP_ENDOCARDIAL_CUSHION_MORPHOGENESIS	ACVR1	ACVRL1	ADAMTS5	APC	APLNR	BMP2	BMP4	BMP5	BMP7	BMPR1A	CPLANE2	DCHS1	ENG	FGF8	GATA5	HEY1	HEY2	HEYL	ISL1	MDM2	MDM4	MSX1	MSX2	NOG	NOS3	NOTCH1	RBPJ	ROBO1	ROBO2	SMAD2	SMAD4	SNAI1	SNAI2	SOX9	TBX2	TBX20	TBX3	TGFB1	TGFB2	TGFB3	TGFBR1	TGFBR2	TMEM100	TWIST1
GOBP_ENDOCARDIAL_CUSHION_TO_MESENCHYMAL_TRANSITION	https://www.gsea-msigdb.org/gsea/msigdb/human/geneset/GOBP_ENDOCARDIAL_CUSHION_TO_MESENCHYMAL_TRANSITION	ACVRL1	EFNA1	ENG	HAS2	HEY2	TWIST1
GOBP_ENDOCARDIUM_DEVELOPMENT	https://www.gsea-msigdb.org/gsea/msigdb/human/geneset/GOBP_ENDOCARDIUM_DEVELOPMENT	ACVR1	KDR	NOTCH1	NRG1	OVOL2	PROX1	RBPJ	SMAD4	SOX17	SOX18	STK3	STK4
GOBP_ENDOCARDIUM_MORPHOGENESIS	https://www.gsea-msigdb.org/gsea/msigdb/human/geneset/GOBP_ENDOCARDIUM_MORPHOGENESIS	NOTCH1	OVOL2	PROX1	RBPJ	SOX17	SOX18
GOBP_ENDOCHONDRAL_BONE_MORPHOGENESIS	https://www.gsea-msigdb.org/gsea/msigdb/human/geneset/GOBP_ENDOCHONDRAL_BONE_MORPHOGENESIS	ALPL	ANXA6	ATF2	AXIN2	BMP4	BMP6	BMPR1B	BMPR2	BPNT2	CBS	CER1	COL13A1	COL1A1	COL27A1	COL2A1	COL3A1	COMP	CSGALNACT1	DLX5	ENSG00000274276	EXT1	EXT2	FGF18	FGFR3	FOSL2	FOXC1	GHR	HOXA11	IFT80	IHH	INPPL1	MATN1	MEF2C	MEF2D	MMP13	MMP14	MMP16	NAB1	NAB2	NPPC	NPR2	PEX7	PHOSPHO1	RARA	RARB	RARG	RUNX2	SCX
GOBP_ENDOCRINE_HORMONE_SECRETION	https://www.gsea-msigdb.org/gsea/msigdb/human/geneset/GOBP_ENDOCRINE_HORMONE_SECRETION	AGT	AGTR1	AQP1	BMP6	C1QTNF1	C1QTNF3	CGA	CRH	CRHBP	CRHR1	CRY1	CRY2	CYP19A1	DAB2	FOXD1	FOXL2	FZD4	GAL	GALR1	GATA3	GDF9	GHRL	GJA1	GNRHR	HCAR2	IL1B	INHA	INHBA	INHBB	KCNQ1	KDM5B	KISS1	LEP	NIBAN2	NKX3-1	NPVF	OPRK1	POMC	PPARG	PTPN11	RAB11FIP1	RAB11FIP3	RAB11FIP5	RAB8B	REN	RETN	SELENOM	SMAD4
GOBP_ENDOCRINE_PANCREAS_DEVELOPMENT	https://www.gsea-msigdb.org/gsea/msigdb/human/geneset/GOBP_ENDOCRINE_PANCREAS_DEVELOPMENT	AKT1	ANXA1	BAD	BAK1	BHLHA15	BMAL1	BMP4	BMP5	BMP6	CDH2	CDK6	CLOCK	DLL1	EIF2AK3	FOXA2	GATA6	GDF11	GIP	GIPR	GSK3A	GSK3B	HES1	IL6	IL6R	INSM1	MIR541	MNX1	NEUROD1	NKX2-2	NKX6-1	NKX6-2	ONECUT1	ONECUT2	PAX6	PDPK1	PDX1	RFX3	RFX6	RHEB	SIDT2	SMO	SOX4	SOX9	VHL	WNT5A	ZNF800
GOBP_ENDOCRINE_PROCESS	https://www.gsea-msigdb.org/gsea/msigdb/human/geneset/GOBP_ENDOCRINE_PROCESS	ACE	ACE2	AGT	AGTR1	AGTR2	AQP1	ATP6AP2	AVPR1A	AVPR1B	AVPR2	BMP6	C1QTNF1	C1QTNF3	CGA	CMA1	CORIN	CPA3	CRH	CRHBP	CRHR1	CRY1	CRY2	CTSG	CTSZ	CYP11B2	CYP19A1	DAB2	DRD5	ECE1	EDN1	EDN2	EDN3	EDNRB	ENPEP	F2R	F2RL1	FOXD1	FOXL2	FZD4	GAL	GALR1	GATA3	GDF9	GHRL	GJA1	GNRHR	HCAR2	HSD11B2
GOBP_ENDOCRINE_SYSTEM_DEVELOPMENT	https://www.gsea-msigdb.org/gsea/msigdb/human/geneset/GOBP_ENDOCRINE_SYSTEM_DEVELOPMENT	AKT1	ALDH1A2	ANXA1	APOA1	ARID5B	ARMC5	ASCL1	BAD	BAK1	BHLHA15	BMAL1	BMP2	BMP4	BMP5	BMP6	BMPR1A	BRAF	CDH1	CDH2	CDK6	CDKN1C	CGA	CITED2	CLOCK	CREB1	CRH	CRHR1	CRKL	CTNS	CYP1B1	DKK3	DLL1	DRD2	EDN1	EDNRA	EIF2AK3	FGF10	FGF2	FGF8	FOXA2	FOXE1	FOXI3	GATA2	GATA3	GATA6	GCM2	GDF11	GHRH
GOBP_ENDOCYTIC_RECYCLING	https://www.gsea-msigdb.org/gsea/msigdb/human/geneset/GOBP_ENDOCYTIC_RECYCLING	ACAP2	ACTN2	AKAP5	ANKRD27	ANKRD50	ARF6	ARHGAP1	ARHGAP44	ARHGAP8	ARL4C	ATP6AP1	ATP9A	BLTP1	BVES	CCDC22	CCDC93	CMTM6	DENND1A	DENND1B	DENND1C	EHD1	EHD2	EHD3	EHD4	EIPR1	ENTR1	EPG5	EPS15	GGA3	GRIP1	GRIP2	GRIPAP1	HGS	INPP5F	LMTK2	LRRC7	MICALL1	MICALL2	NDRG4	NSG1	PLA2G3	PLA2G4E	PTPN23	RAB11A	RAB11B	RAB11FIP3	RAB11FIP4	RAB12
GOBP_ENDOCYTOSIS	https://www.gsea-msigdb.org/gsea/msigdb/human/geneset/GOBP_ENDOCYTOSIS	AAK1	ABCA1	ABCA13	ABCA2	ABCA7	ABL1	ABL2	ACE2	ACHE	ACKR2	ACKR3	ACKR4	ACTB	ACTG1	ADGRB1	ADIPOQ	ADM	ADORA1	ADORA2A	ADRB2	ADRB3	AGER	AHI1	AHSG	AIF1	ALOX15	AMN	AMPH	ANGPT1	ANK2	ANKFY1	ANKRD13A	ANKRD13B	ANKRD13D	ANO6	ANXA1	ANXA11	ANXA2	ANXA3	AP1G1	AP1S1	AP2A1	AP2A2	AP2B1	AP2M1	AP2S1	AP3B2	AP3D1
GOBP_ENDOCYTOSIS_INVOLVED_IN_VIRAL_ENTRY_INTO_HOST_CELL	https://www.gsea-msigdb.org/gsea/msigdb/human/geneset/GOBP_ENDOCYTOSIS_INVOLVED_IN_VIRAL_ENTRY_INTO_HOST_CELL	ACE2	CAV1	CAV2	CLEC4M	CTSL	DPP4	EPS15	JPT2	PIKFYVE	RNASEK	SIGLEC1	TPCN1	TPCN2
GOBP_ENDODERMAL_CELL_DIFFERENTIATION	https://www.gsea-msigdb.org/gsea/msigdb/human/geneset/GOBP_ENDODERMAL_CELL_DIFFERENTIATION	CDC73	COL11A1	COL12A1	COL4A2	COL5A1	COL5A2	COL6A1	COL7A1	COL8A1	CTNNB1	CTR9	DKK1	EOMES	FN1	GATA6	GRB2	HMGA2	HNF1B	HSBP1	INHBA	ITGA4	ITGA5	ITGA7	ITGAV	ITGB2	ITGB5	LAMA3	LAMB1	LAMB3	LEO1	MACROH2A1	MAP2K1	MESP1	MIXL1	MMP14	MMP15	MMP2	MMP8	MMP9	NANOG	NODAL	NR0B1	PAF1	POU5F1	RTF1	SETD2	SOX17	SOX2
GOBP_ENDODERMAL_CELL_FATE_COMMITMENT	https://www.gsea-msigdb.org/gsea/msigdb/human/geneset/GOBP_ENDODERMAL_CELL_FATE_COMMITMENT	CDC73	CTNNB1	CTR9	DKK1	EOMES	GATA6	HNF1B	LEO1	MESP1	NANOG	PAF1	POU5F1	RTF1	SOX17	SOX2
GOBP_ENDODERMAL_CELL_FATE_SPECIFICATION	https://www.gsea-msigdb.org/gsea/msigdb/human/geneset/GOBP_ENDODERMAL_CELL_FATE_SPECIFICATION	DKK1	EOMES	HNF1B	MESP1	NANOG	POU5F1	SOX17	SOX2
GOBP_ENDODERM_DEVELOPMENT	https://www.gsea-msigdb.org/gsea/msigdb/human/geneset/GOBP_ENDODERM_DEVELOPMENT	APELA	ARC	BMP4	BMPR1A	BPTF	CDC73	COL11A1	COL12A1	COL4A2	COL5A1	COL5A2	COL6A1	COL7A1	COL8A1	CTNNB1	CTR9	DKK1	DUSP1	DUSP2	DUSP4	DUSP5	EOMES	EPB41L5	EXT1	FGF8	FN1	GATA4	GATA6	GDF3	GRB2	HDAC1	HMGA2	HNF1B	HOXC11	HSBP1	INHBA	ITGA4	ITGA5	ITGA7	ITGAV	ITGB2	ITGB5	KIF16B	LAMA3	LAMB1	LAMB3	LAMC1	LEO1
GOBP_ENDODERM_FORMATION	https://www.gsea-msigdb.org/gsea/msigdb/human/geneset/GOBP_ENDODERM_FORMATION	CDC73	COL11A1	COL12A1	COL4A2	COL5A1	COL5A2	COL6A1	COL7A1	COL8A1	CTNNB1	CTR9	DKK1	DUSP1	DUSP2	DUSP4	DUSP5	EOMES	FN1	GATA6	GRB2	HMGA2	HNF1B	HSBP1	INHBA	ITGA4	ITGA5	ITGA7	ITGAV	ITGB2	ITGB5	LAMA3	LAMB1	LAMB3	LEO1	LHX1	MACROH2A1	MAP2K1	MESP1	MIXL1	MMP14	MMP15	MMP2	MMP8	MMP9	NANOG	NODAL	NOG	NR0B1
GOBP_ENDOLYSOSOMAL_TOLL_LIKE_RECEPTOR_SIGNALING_PATHWAY	https://www.gsea-msigdb.org/gsea/msigdb/human/geneset/GOBP_ENDOLYSOSOMAL_TOLL_LIKE_RECEPTOR_SIGNALING_PATHWAY	CAV1	COLEC12	DDX3X	EPG5	F2RL1	FCRL3	FLOT1	FLOT2	GRAMD4	HAVCR2	HMGB1	IKBKB	IRAK1	IRAK4	LILRA4	MAP3K7	MYD88	NR1H4	OAS1	PELI1	PIK3AP1	PTPN22	PTPRS	RAB7B	RFTN1	RSAD2	RTN4	SCARA3	SCIMP	SLC15A4	SRC	TASL	TICAM1	TIRAP	TLR3	TLR7	TLR8	TLR9	TNF	TNFAIP3	TNIP2	TRAF6	TREML4	TRIM3	UBQLN1	UNC93B1	WDFY1
GOBP_ENDOMEMBRANE_SYSTEM_ORGANIZATION	https://www.gsea-msigdb.org/gsea/msigdb/human/geneset/GOBP_ENDOMEMBRANE_SYSTEM_ORGANIZATION	A4GALT	ABCA1	ABCA7	ABCD1	ABCD2	ACRBP	ACTL7A	ACTL9	ADAM2	AGFG1	AHNAK	AKAP8L	AKAP9	AKT1	AKT2	AKTIP	ALS2	ANK2	ANK3	ANKLE2	ANO3	ANO4	ANO6	ANO7	ANO9	ANXA2	ANXA6	ANXA8	ANXA8L1	AP1B1	AP1G1	AP1M1	AP1S1	AP1S2	AP1S3	AP3B1	AP3D1	AP3M1	AP3S1	AP3S2	AQP1	AQP11	AR	ARFGEF1	ARFGEF2	ARHGAP21	ARHGEF7	ARL1
GOBP_ENDONUCLEOLYTIC_CLEAVAGE_IN_5_ETS_OF_TRICISTRONIC_RRNA_TRANSCRIPT_SSU_RRNA_5_8S_RRNA_LSU_RRNA	https://www.gsea-msigdb.org/gsea/msigdb/human/geneset/GOBP_ENDONUCLEOLYTIC_CLEAVAGE_IN_5_ETS_OF_TRICISTRONIC_RRNA_TRANSCRIPT_SSU_RRNA_5_8S_RRNA_LSU_RRNA	ABT1	FCF1	NOP14	NOP9	RCL1	TBL3	UTP20	UTP23
GOBP_ENDONUCLEOLYTIC_CLEAVAGE_IN_ITS1_TO_SEPARATE_SSU_RRNA_FROM_5_8S_RRNA_AND_LSU_RRNA_FROM_TRICISTRONIC_RRNA_TRANSCRIPT_SSU_RRNA_5_8S_RRNA_LSU_RRNA	https://www.gsea-msigdb.org/gsea/msigdb/human/geneset/GOBP_ENDONUCLEOLYTIC_CLEAVAGE_IN_ITS1_TO_SEPARATE_SSU_RRNA_FROM_5_8S_RRNA_AND_LSU_RRNA_FROM_TRICISTRONIC_RRNA_TRANSCRIPT_SSU_RRNA_5_8S_RRNA_LSU_RRNA	ABT1	FCF1	KRI1	NOP14	NOP9	RCL1	RPP40	RPS21	RRS1	UTP20
GOBP_ENDONUCLEOLYTIC_CLEAVAGE_OF_TRICISTRONIC_RRNA_TRANSCRIPT_SSU_RRNA_5_8S_RRNA_LSU_RRNA	https://www.gsea-msigdb.org/gsea/msigdb/human/geneset/GOBP_ENDONUCLEOLYTIC_CLEAVAGE_OF_TRICISTRONIC_RRNA_TRANSCRIPT_SSU_RRNA_5_8S_RRNA_LSU_RRNA	ABT1	BMS1	BOP1	FCF1	KRI1	NOL9	NOP14	NOP9	RCL1	RPP40	RPS21	RRS1	SDE2	TBL3	TSR1	UTP20	UTP23
GOBP_ENDOPLASMIC_RETICULUM_CALCIUM_ION_HOMEOSTASIS	https://www.gsea-msigdb.org/gsea/msigdb/human/geneset/GOBP_ENDOPLASMIC_RETICULUM_CALCIUM_ION_HOMEOSTASIS	APP	ATP2A1	ATP2A2	BAK1	BAX	BCAP31	BCL2	CAMK2D	CCDC47	FIS1	GRINA	HERPUD1	ITPR1	KCTD17	PACS2	PML	PSEN1	RAP1GDS1	SELENOK	TGM2	THADA	TMBIM6	TMCO1	TMTC4	TUNAR	WFS1
GOBP_ENDOPLASMIC_RETICULUM_LOCALIZATION	https://www.gsea-msigdb.org/gsea/msigdb/human/geneset/GOBP_ENDOPLASMIC_RETICULUM_LOCALIZATION	ESYT1	ESYT2	ESYT3	GRAMD2A	MYZAP	POLR2M	TLE6	VAPA	VAPB	ZBED3
GOBP_ENDOPLASMIC_RETICULUM_MEMBRANE_ORGANIZATION	https://www.gsea-msigdb.org/gsea/msigdb/human/geneset/GOBP_ENDOPLASMIC_RETICULUM_MEMBRANE_ORGANIZATION	ARL6IP1	ATL1	ATL2	BNIP1	LPCAT3	REEP5	RTN4	STEEP1	STX18	TMED2	TRDN	VAPB	VCPIP1
GOBP_ENDOPLASMIC_RETICULUM_ORGANIZATION	https://www.gsea-msigdb.org/gsea/msigdb/human/geneset/GOBP_ENDOPLASMIC_RETICULUM_ORGANIZATION	ARL6IP1	ATL1	ATL2	ATL3	BAG6	BNIP1	CACNA1S	CAMLG	CASQ1	CAV2	CCDC47	CERT1	CRYZL2P-SEC16B	DNM1L	DOP1B	EIF2AK3	EMC1	EMC10	EMC2	EMC3	EMC4	EMC6	EMC7	EMC8	EMC9	ESYT1	ESYT2	ESYT3	GAK	GET1	GET3	GET4	GRAMD2A	JAGN1	LMAN1	LNPK	LPCAT3	LRRK2	MAPK15	MIA3	MMGT1	MYZAP	NCLN	NOMO1	NOMO2	NOMO3	PEX5	POLR2M
GOBP_ENDOPLASMIC_RETICULUM_PLASMA_MEMBRANE_TETHERING	https://www.gsea-msigdb.org/gsea/msigdb/human/geneset/GOBP_ENDOPLASMIC_RETICULUM_PLASMA_MEMBRANE_TETHERING	ESYT1	ESYT2	ESYT3	GRAMD2A	VAPA	VAPB
GOBP_ENDOPLASMIC_RETICULUM_TO_CYTOSOL_TRANSPORT	https://www.gsea-msigdb.org/gsea/msigdb/human/geneset/GOBP_ENDOPLASMIC_RETICULUM_TO_CYTOSOL_TRANSPORT	AUP1	BCAP31	BRSK2	DERL1	DERL2	DERL3	EDEM1	EDEM2	ERLEC1	FAF2	HERPUD1	HM13	HSP90B1	NPLOC4	OS9	RHBDD1	SEC61B	SEL1L	SELENOS	SVIP	SYVN1	TMEM129	UBAC2	UBE2G2	UBE2J1	UFD1	VCP	YOD1
GOBP_ENDOPLASMIC_RETICULUM_TO_GOLGI_VESICLE_MEDIATED_TRANSPORT	https://www.gsea-msigdb.org/gsea/msigdb/human/geneset/GOBP_ENDOPLASMIC_RETICULUM_TO_GOLGI_VESICLE_MEDIATED_TRANSPORT	ANK1	ARCN1	ARF4	ATL2	ATL3	BCAP29	BCAP31	BET1	CIDEB	CNIH4	COG3	COPA	COPB1	COPB2	COPE	COPG1	COPG2	CREB3L2	CRYZL2P-SEC16B	CSNK1D	CTAGE1	CTAGE15	CTAGE4	CTAGE6	CTAGE8	CTAGE9	CUL3	ERGIC1	ERGIC2	ERGIC3	GAS1	GBF1	GOLGA2	GOLT1A	GOLT1B	GOPC	GOSR1	GOSR2	HYOU1	IER3IP1	INSIG1	KDELR1	KDELR2	KDELR3	KLHL12	LMAN1	LMAN1L	LMAN2
GOBP_ENDOPLASMIC_RETICULUM_TUBULAR_NETWORK_FORMATION	https://www.gsea-msigdb.org/gsea/msigdb/human/geneset/GOBP_ENDOPLASMIC_RETICULUM_TUBULAR_NETWORK_FORMATION	ARL6IP1	RTN1	RTN3	RTN4	ZFYVE27
GOBP_ENDOPLASMIC_RETICULUM_TUBULAR_NETWORK_ORGANIZATION	https://www.gsea-msigdb.org/gsea/msigdb/human/geneset/GOBP_ENDOPLASMIC_RETICULUM_TUBULAR_NETWORK_ORGANIZATION	ARL6IP1	ATL1	ATL2	ATL3	LNPK	RAB10	RAB18	RAB3GAP1	RAB3GAP2	REEP1	REEP2	REEP3	REEP4	RETREG3	RTN1	RTN3	RTN4	TMEM170A	TMEM33	ZFYVE27
GOBP_ENDOPLASMIC_RETICULUM_UNFOLDED_PROTEIN_RESPONSE	https://www.gsea-msigdb.org/gsea/msigdb/human/geneset/GOBP_ENDOPLASMIC_RETICULUM_UNFOLDED_PROTEIN_RESPONSE	ABCA7	AGR2	AMFR	ATF3	ATF4	ATF6	ATF6B	BAK1	BAX	BCL2L11	BFAR	BHLHA15	BOK	CCND1	CDK5RAP3	COPS5	CREB3	CREB3L1	CREBZF	CTH	DAB2IP	DDIT3	DDRGK1	DERL1	DERL2	DERL3	DNAJB9	DNAJC10	EIF2AK2	EIF2AK3	EIF2S1	ERLEC1	ERMP1	ERN1	ERN2	ERO1A	FGF21	FICD	HERPUD1	HERPUD2	HSPA5	MBTPS1	MBTPS2	MIR199A1	NCK1	NCK2	NFE2L2	OS9
GOBP_ENDOSOMAL_LUMEN_ACIDIFICATION	https://www.gsea-msigdb.org/gsea/msigdb/human/geneset/GOBP_ENDOSOMAL_LUMEN_ACIDIFICATION	AQP11	ATP6AP1	ATP6AP2	ATP6V0A1	ATP6V0B	ATP6V0C	ATP6V1A	ATP6V1D	ATP6V1F	ATP6V1H	CLCN3	FASLG	RNASEK	TMEM9
GOBP_ENDOSOMAL_TRANSPORT	https://www.gsea-msigdb.org/gsea/msigdb/human/geneset/GOBP_ENDOSOMAL_TRANSPORT	ABCA1	ACAP2	ACTN2	AGAP2	AKAP5	ALMS1	ALS2	ALS2CL	ANKFY1	ANKRD27	ANKRD50	ANXA8	ANXA8L1	AP1G1	AP3D1	AP5B1	AP5M1	AP5S1	AP5Z1	ARF6	ARFIP1	ARFRP1	ARHGAP1	ARHGAP44	ARHGAP8	ARL1	ARL4C	ARL8B	ASB15	ATP6AP1	ATP9A	BAIAP3	BET1L	BLOC1S1	BLOC1S2	BLTP1	BLTP3B	BVES	CALY	CCDC22	CCDC93	CHMP1A	CHMP1B	CHMP2A	CHMP2B	CHMP3	CHMP4A	CHMP4B
GOBP_ENDOSOMAL_VESICLE_FUSION	https://www.gsea-msigdb.org/gsea/msigdb/human/geneset/GOBP_ENDOSOMAL_VESICLE_FUSION	ANKFY1	SAMD9	SPHK1	TGFBRAP1	VPS11	VPS16	VPS18	VPS33A	VPS39	VPS41	VPS4A	VPS8
GOBP_ENDOSOME_ORGANIZATION	https://www.gsea-msigdb.org/gsea/msigdb/human/geneset/GOBP_ENDOSOME_ORGANIZATION	AKTIP	ALS2	ANXA8	ANXA8L1	AQP11	ARFGEF2	ATP6AP1	ATP6AP2	ATP6V0A1	ATP6V0B	ATP6V0C	ATP6V1A	ATP6V1D	ATP6V1F	ATP6V1H	CHMP1A	CHMP1B	CHMP2A	CHMP2B	CHMP3	CHMP4A	CHMP4B	CHMP4C	CHMP5	CHMP6	CHMP7	CLCN3	CORO1C	DNAJC13	DNM1	EEA1	EXOC8	FASLG	FHIP1B	HGS	HOOK1	HOOK2	HOOK3	IST1	LAMTOR1	LAPTM4B	MVB12A	PDCD6IP	PHETA1	PHETA2	PI4K2A	PI4K2B	PLEKHA3
GOBP_ENDOSOME_TO_LYSOSOME_TRANSPORT	https://www.gsea-msigdb.org/gsea/msigdb/human/geneset/GOBP_ENDOSOME_TO_LYSOSOME_TRANSPORT	ADRB2	AKTIP	AP3D1	ARL8B	ATG14	BECN2	BIN1	CACNG2	CACNG3	CACNG4	CACNG5	CACNG7	CACNG8	CDX2	CHMP1A	CHMP1B	CHMP2A	CHMP2B	CHMP3	CHMP4A	CHMP4B	CHMP4C	CHMP5	CHMP6	CHMP7	CLEC16A	DENND3	DTX3L	EPG5	FHIP1B	GPRASP1	HMGXB4	HOOK1	HOOK2	HOOK3	KIF13A	LIPA	LYST	M6PR	MGRN1	MTM1	MVB12A	PCDHGA3	PLEKHF1	PLEKHF2	PXK	RAB12	RAB7A
GOBP_ENDOSOME_TO_LYSOSOME_TRANSPORT_VIA_MULTIVESICULAR_BODY_SORTING_PATHWAY	https://www.gsea-msigdb.org/gsea/msigdb/human/geneset/GOBP_ENDOSOME_TO_LYSOSOME_TRANSPORT_VIA_MULTIVESICULAR_BODY_SORTING_PATHWAY	CHMP1A	CHMP1B	CHMP2A	CHMP2B	CHMP3	CHMP4A	CHMP4B	CHMP4C	CHMP5	CHMP6	CHMP7	LYST	MVB12A	UBXN6	VCP	VPS4A	VPS4B
GOBP_ENDOSOME_TO_PLASMA_MEMBRANE_PROTEIN_TRANSPORT	https://www.gsea-msigdb.org/gsea/msigdb/human/geneset/GOBP_ENDOSOME_TO_PLASMA_MEMBRANE_PROTEIN_TRANSPORT	AKAP5	ARHGAP44	ATP6AP1	GRIP1	GRIP2	GRIPAP1	LRRC7	NSG1	RAB11A	RAB7A	RAB8A	SCRIB	SORL1	TAMALIN	TRARG1	VPS35	ZDHHC2
GOBP_ENDOTHELIAL_CELL_ACTIVATION	https://www.gsea-msigdb.org/gsea/msigdb/human/geneset/GOBP_ENDOTHELIAL_CELL_ACTIVATION	BMPER	CXCL10	FOXP1	HOXA9	MIR92A1	P2RX4	PPIA	PRMT5	SMAD4	TCIM	TGFBR1
GOBP_ENDOTHELIAL_CELL_APOPTOTIC_PROCESS	https://www.gsea-msigdb.org/gsea/msigdb/human/geneset/GOBP_ENDOTHELIAL_CELL_APOPTOTIC_PROCESS	ABL1	AKR1C3	ANGPT1	ANGPTL4	ANO6	BMPR2	BRAF	CCL2	CD160	CD248	CD40	CD40LG	CDH5	COL4A3	DAB2IP	ECSCR	FASLG	FGA	FGB	FGF21	FGG	GAS6	GATA2	GATA3	GPER1	HIPK1	HLA-G	ICAM1	IL10	IL11	IL13	IL4	ITGA4	ITGB3	KDR	KRIT1	MAP3K5	MAPK7	MIR101-1	MIR106B	MIR125A	MIR126	MIR132	MIR15A	MIR24-1	MIR30B	MIR30E	MIR375
GOBP_ENDOTHELIAL_CELL_CHEMOTAXIS	https://www.gsea-msigdb.org/gsea/msigdb/human/geneset/GOBP_ENDOTHELIAL_CELL_CHEMOTAXIS	CCN3	CORO1B	CXCL13	EGR3	FGF1	FGF16	FGF18	FGF2	FGF4	FGFR1	HRG	HSPB1	KDR	LGMN	MET	MIR149	MIR16-1	MIR424	NOTCH1	NR4A1	NRP1	P2RX4	PLEKHG5	PRKD1	PRKD2	RAB13	SEMA5A	SMOC2	THBS1	TMSB4X	VEGFA
GOBP_ENDOTHELIAL_CELL_DEVELOPMENT	https://www.gsea-msigdb.org/gsea/msigdb/human/geneset/GOBP_ENDOTHELIAL_CELL_DEVELOPMENT	ADD1	AFDN	ARHGEF26	CCM2	CDH5	CLDN1	CLDN3	CLDN5	CLIC4	COL18A1	COL27A1	EDNRA	EDNRB	EZR	F11R	F2RL1	FASN	FOXP3	GPX1	GSTM3	HAPLN2	HEG1	HOXA13	HPSE	ICAM1	IKBKB	IL1B	MARVELD2	MET	MSN	MYADM	MYD88	PDE2A	PDE4D	PECAM1	PLCB1	PLOD3	PPP1R12A	PPP1R16B	PROC	PTPRS	RAB1A	RAB1B	RAP1A	RAP1B	RAP2B	RAP2C	RAPGEF1
GOBP_ENDOTHELIAL_CELL_FATE_COMMITMENT	https://www.gsea-msigdb.org/gsea/msigdb/human/geneset/GOBP_ENDOTHELIAL_CELL_FATE_COMMITMENT	ACVR1	DLL1	HOXA13	NR2F2	NRP1	PDPN	PROX1	RBPJ
GOBP_ENDOTHELIAL_CELL_MATRIX_ADHESION	https://www.gsea-msigdb.org/gsea/msigdb/human/geneset/GOBP_ENDOTHELIAL_CELL_MATRIX_ADHESION	ADAMTS9	CEACAM6	FUT1	GFUS	MIR92A1	MMP12	RIN2	RRAS
GOBP_ENDOTHELIAL_CELL_MIGRATION	https://www.gsea-msigdb.org/gsea/msigdb/human/geneset/GOBP_ENDOTHELIAL_CELL_MIGRATION	AAMP	ABL1	ACVRL1	ADAM17	ADAMTS9	ADGRA2	ADGRB1	ADTRP	AGT	AGTR2	AKT1	AKT3	AMOT	ANGPT1	ANGPT2	ANGPT4	ANXA1	ANXA3	APOA1	APOE	APOH	ATOH8	ATP2B4	ATP5F1A	ATP5F1B	BCAR1	BCAS3	BMP10	BMPER	CALR	CARD10	CCBE1	CCN3	CD40	CDH13	CDH5	CEACAM1	CIB1	CLEC14A	CLN3	CORO1B	CSNK2B	CXCL13	CYP1B1	DAB2IP	DCN	DLL4	DNAJA4
GOBP_ENDOTHELIAL_CELL_MORPHOGENESIS	https://www.gsea-msigdb.org/gsea/msigdb/human/geneset/GOBP_ENDOTHELIAL_CELL_MORPHOGENESIS	ARHGEF26	CLIC4	COL18A1	COL27A1	HEG1	HOXA13	MET	PLOD3	STC1	TNMD
GOBP_ENDOTHELIAL_CELL_PROLIFERATION	https://www.gsea-msigdb.org/gsea/msigdb/human/geneset/GOBP_ENDOTHELIAL_CELL_PROLIFERATION	ACVRL1	ADAM17	AGGF1	AGTR1	AIMP1	AKT1	AKT3	ALDH1A2	ALOX5	ANG	ANGPT1	ANGPT4	APELA	APLN	APLNR	APOA1	APOE	APOH	ARNT	ATOH8	ATP5F1A	ATP5IF1	BMP4	BMP6	BMPER	BMPR2	CAV1	CAV2	CCL11	CCL2	CCL24	CCL26	CCR3	CD34	CDH13	CNMD	COL4A3	COL8A1	COL8A2	CXCL12	DBH	DLG1	DLL4	ECM1	EGF	EGFL7	EGR3	EMC10
GOBP_ENDOTHELIN_RECEPTOR_SIGNALING_PATHWAY	https://www.gsea-msigdb.org/gsea/msigdb/human/geneset/GOBP_ENDOTHELIN_RECEPTOR_SIGNALING_PATHWAY	BCAR1	BCAR3	CDC42	CRKL	EDN1	EDNRA	EDNRB	FBXW7-AS1	GNA11	PTK2B	SIX1
GOBP_ENDOTHELIUM_DEVELOPMENT	https://www.gsea-msigdb.org/gsea/msigdb/human/geneset/GOBP_ENDOTHELIUM_DEVELOPMENT	ACVR1	ACVR2B	ACVRL1	ADAMTS12	ADD1	AFDN	APOLD1	ARHGEF26	ATOH8	BARX1	BMP4	BMP6	BMPR2	BTG1	CCM2	CD34	CDH5	CEACAM1	CLDN1	CLDN3	CLDN5	CLIC4	COL18A1	COL27A1	CSNK2B	CTNNB1	CXCL10	CXCR4	DLL1	DLL4	EDF1	EDNRA	EDNRB	ETV2	EZR	F11R	F2RL1	FASN	FGF1	FOXC2	FOXJ2	FOXP1	FOXP3	FSTL1	FZD1	FZD2	FZD4	GDF2
GOBP_ENERGY_DERIVATION_BY_OXIDATION_OF_ORGANIC_COMPOUNDS	https://www.gsea-msigdb.org/gsea/msigdb/human/geneset/GOBP_ENERGY_DERIVATION_BY_OXIDATION_OF_ORGANIC_COMPOUNDS	ABCD1	ACADM	ACADVL	ACLY	ACO1	ACO2	ACSM1	ACTN3	ADCY10	ADGRF1	ADGRF5	ADRB3	ADSL	AFG1L	AGL	AIFM2	AK4	AKT1	AKT2	ANTKMT	ARL2	ATP5F1A	ATP5F1B	ATP5F1C	ATP5F1D	ATP5F1E	ATP5F1EP2	ATP5ME	ATP5MF	ATP5MG	ATP5PB	ATP5PD	ATP5PF	ATP5PO	ATP7A	ATPSCKMT	BID	BLOC1S1	BNIP3	C2orf69	CAT	CAVIN3	CBFA2T3	CCNB1	CDK1	CHCHD10	CHCHD2	CHCHD5
GOBP_ENERGY_HOMEOSTASIS	https://www.gsea-msigdb.org/gsea/msigdb/human/geneset/GOBP_ENERGY_HOMEOSTASIS	ACACB	ACVR1C	ADRB1	ADRB2	ADRB3	ALK	AMPD2	APOE	APPL2	BMP8A	CCDC198	CD36	CNTN2	CRTC1	CRTC3	DLL1	EDN2	EIF4G1	FLCN	FMO1	FMO2	FMO4	FOXO1	GDF15	GDF3	GFRAL	IGF2BP2	IRX3	LEP	LEPR	LIPA	MAPK14	MC4R	METRNL	MEX3C	MFSD2A	MLXIPL	MRAP2	NMU	NMUR2	NR1D2	NR4A3	OMA1	PASK	PCSK1N	PIK3CA	PM20D1	PPARD
GOBP_ENERGY_RESERVE_METABOLIC_PROCESS	https://www.gsea-msigdb.org/gsea/msigdb/human/geneset/GOBP_ENERGY_RESERVE_METABOLIC_PROCESS	ACADM	ADCY10	ADGRF1	ADGRF5	ADRB3	AGL	AKT1	AKT2	DYRK2	ENPP1	EPM2AIP1	G6PC1	GAA	GABARAPL1	GBE1	GCGR	GCK	GFPT1	GFPT2	GNMT	GSK3A	GSK3B	GYG1	GYG2	GYS1	GYS2	IGF1	IGF2	IL6ST	INPP5K	INS	INSR	IRS1	IRS2	KHK	KL	LEP	LEPR	MC4R	MIR1271	MIR15B	MIR195	MRAP2	MT3	MTOR	NHLRC1	NR1D1	PASK
GOBP_ENGULFMENT_OF_APOPTOTIC_CELL	https://www.gsea-msigdb.org/gsea/msigdb/human/geneset/GOBP_ENGULFMENT_OF_APOPTOTIC_CELL	ABCA7	ADGRB1	ALOX15	BECN1	MEGF10	RAC1	RAC3	THBS1	TREM2	XKR4	XKR5	XKR6	XKR7	XKR8	XKR9
GOBP_ENSHEATHMENT_OF_NEURONS	https://www.gsea-msigdb.org/gsea/msigdb/human/geneset/GOBP_ENSHEATHMENT_OF_NEURONS	ABCA2	ABCD1	ABCD2	ACER3	ACSBG1	ADGRG6	AFG3L2	AKT1	AKT2	AMIGO1	ANK2	ARHGEF10	ASPA	ATRN	B4GALT5	B4GALT6	BCAS1	CD9	CLDN11	CLDN5	CLU	CMTM8	CNTN1	CNTN2	CNTNAP1	CST7	CTNNB1	CTSC	CXCR4	CYFIP1	DAG1	DEGS1	DHH	DICER1	DLG1	EGR2	EIF2AK3	EIF2B2	EIF2B4	EIF2B5	EPB41L3	ERBB2	ERCC2	FA2H	FIG4	GAL3ST1	GALC	GJC3
GOBP_ENTERIC_NERVOUS_SYSTEM_DEVELOPMENT	https://www.gsea-msigdb.org/gsea/msigdb/human/geneset/GOBP_ENTERIC_NERVOUS_SYSTEM_DEVELOPMENT	EDNRA	EDNRB	GDNF	HLX	KIF26A	PHACTR4	PHOX2B	RET	SLC6A4	SOX10	SOX8	TLX2
GOBP_ENTEROENDOCRINE_CELL_DIFFERENTIATION	https://www.gsea-msigdb.org/gsea/msigdb/human/geneset/GOBP_ENTEROENDOCRINE_CELL_DIFFERENTIATION	AKT1	ASCL1	BAD	BHLHA15	BMAL1	BMP4	BMP5	BMP6	CDH2	CDK6	CLOCK	DLL1	GATA6	GDF11	GSK3A	GSK3B	HES1	INSM1	MIR541	NEUROD1	NKX2-2	NKX6-1	NKX6-2	NKX6-3	ONECUT1	PAX6	PDPK1	PDX1	PERCC1	RBM4	RFX3	RFX6	RHEB	SIDT2	SMO	VHL	WNT5A
GOBP_ENTRAINMENT_OF_CIRCADIAN_CLOCK	https://www.gsea-msigdb.org/gsea/msigdb/human/geneset/GOBP_ENTRAINMENT_OF_CIRCADIAN_CLOCK	ATOH7	BHLHE40	BMAL2	CRTC1	CRY1	CRY2	FBXL17	FBXL21P	FBXL3	GNA11	GNAQ	ID2	MTA1	NR2F6	OPN5	PDE6B	PER1	PER2	PER3	PHLPP1	PML	PPP1CA	PPP1CB	PPP1CC	RBM4	RBM4B	SIK1	SOX14	TP53	USP2
[truncated: 9,107 more rows]
[truncated: 1,946 more columns]
