# Supplementary material for: Identification of hypoxia- and mitochondria-related genes associated with recurrent spontaneous abortion: an integrative bioinformatics analysis and preliminary validation
Source: PeerJ journal article supplement (doi:10.7717/peerj.20467), 2025-12-19
Supplement: Supplementary_Table_4.xlsx [file Supplementary_Table_4.xlsx]

## Sheet: c2.cp.kegg.v2023.1.Hs.symbols
Supplementary Table 4 Specific information related to the background gene set (c2.cp.kegg.v2023.1.Hs.symbols.gmt)
KEGG	Wibesite	Gene list
KEGG_N_GLYCAN_BIOSYNTHESIS	http://www.gsea-msigdb.org/gsea/msigdb/human/geneset/KEGG_N_GLYCAN_BIOSYNTHESIS	ALG13	DOLPP1	RPN1	ALG14	MAN1B1	ALG3	B4GALT1	MGAT5	RPN2	STT3A	MGAT3	DAD1	MGAT2	ALG12	TUSC3	MAN1C1	DPM2	DPM1	GANAB	ALG1	MGAT4A	ALG10B	STT3B	MAN1A2	ALG10	ALG11	ALG8	ALG2	DPAGT1	RFT1	DPM3	DDOST	MGAT4B	ALG6	MAN2A2	MAN1A1	MAN2A1	ST6GAL1	B4GALT3	ALG5	B4GALT2	MGAT5B	ALG9	MOGS	FUT8	MGAT1
KEGG_OTHER_GLYCAN_DEGRADATION	http://www.gsea-msigdb.org/gsea/msigdb/human/geneset/KEGG_OTHER_GLYCAN_DEGRADATION	ENGASE	GLB1	MANBA	MAN2B1	GBA1	NEU4	NEU2	NEU1	FUCA1	FUCA2	AGA	MAN2C1	MAN2B2	NEU3	HEXB	HEXA
KEGG_O_GLYCAN_BIOSYNTHESIS	http://www.gsea-msigdb.org/gsea/msigdb/human/geneset/KEGG_O_GLYCAN_BIOSYNTHESIS	GALNT4	GALNT15	GALNTL5	GALNT6	GALNT5	GALNT16	GALNTL6	GALNT13	GCNT3	GALNT10	ST6GALNAC1	GALNT9	GALNT7	GCNT4	GALNT11	GCNT1	GALNT8	GALNT14	B3GNT6	C1GALT1	GALNT18	GALNT12	GALNT2	GALNT3	GALNT17	GALNT1	ST3GAL2	ST3GAL1	B4GALT5	C1GALT1C1
KEGG_GLYCOSAMINOGLYCAN_DEGRADATION	http://www.gsea-msigdb.org/gsea/msigdb/human/geneset/KEGG_GLYCOSAMINOGLYCAN_DEGRADATION	HS3ST3A1	HPSE	HPSE2	GLB1	GUSB	HYAL3	GNS	HYAL4	HYAL1	HYAL2	SPAM1	HGSNAT	GALNS	IDUA	HS3ST3B1	SGSH	HEXB	NAGLU	HEXA	IDS	ARSB
KEGG_GLYCOSAMINOGLYCAN_BIOSYNTHESIS_KERATAN_SULFATE	http://www.gsea-msigdb.org/gsea/msigdb/human/geneset/KEGG_GLYCOSAMINOGLYCAN_BIOSYNTHESIS_KERATAN_SULFATE	CHST2	B4GAT1	B3GNT2	CHST1	B4GALT1	B3GNT7	ST3GAL2	B4GALT3	ST3GAL1	B4GALT2	B4GALT4	CHST4	ST3GAL3	FUT8	CHST6
KEGG_GLYCEROLIPID_METABOLISM	http://www.gsea-msigdb.org/gsea/msigdb/human/geneset/KEGG_GLYCEROLIPID_METABOLISM	MBOAT2	GPAM	LIPG	DGKZ	DGKE	DGKD	DGKH	MBOAT1	GK	DGAT2	GK2	GLA	ALDH7A1	AGK	TKFC	AGPAT3	AWAT2	AGPAT4	AKR1B1	PNLIPRP2	PNLIPRP1	PNLIP	DGAT1	GLYCTK	LPL	ALDH1B1	DGKQ	ALDH2	DGKB	DGKG	AKR1A1	DGKA	PLPP3	LIPC	DGKI	LCLAT1	GPAT3	MGLL	GPAT4	ALDH9A1	ALDH3A2	PNPLA3	PLPP1	PLPP2	AGPAT1	AGPAT2	CEL	GPAT2
KEGG_GLYCOSYLPHOSPHATIDYLINOSITOL_GPI_ANCHOR_BIOSYNTHESIS	http://www.gsea-msigdb.org/gsea/msigdb/human/geneset/KEGG_GLYCOSYLPHOSPHATIDYLINOSITOL_GPI_ANCHOR_BIOSYNTHESIS	PIGP	PIGW	PIGM	PIGN	PIGS	PIGF	DPM2	PIGQ	PIGH	PIGO	PIGG	PIGZ	GPAA1	PIGU	PGAP1	PIGT	PIGK	PIGY	PIGL	PIGV	PIGB	PIGX	PIGA	GPLD1	PIGC
KEGG_GLYCEROPHOSPHOLIPID_METABOLISM	http://www.gsea-msigdb.org/gsea/msigdb/human/geneset/KEGG_GLYCEROPHOSPHOLIPID_METABOLISM	PEMT	PLA2G15	GPD1	GPD1L	LPGAT1	GPAM	MBOAT2	MBOAT7	CHAT	LPCAT1	PTDSS1	ACHE	PLA2G3	DGKZ	ETNK1	DGKE	DGKD	PCYT1A	DGKH	JMJD7-PLA2G4B	CHPT1	MBOAT1	PLA2G6	PLA2G2E	PLA2G10	LPCAT3	PLA2G2A	ETNK2	PLA2G4A	PLA2G5	PLA2G12B	PLA2G4B	PTDSS2	PLA2G2F	PCYT2	CDS1	AGPAT3	AGPAT4	PGS1	LYPLA1	PLA2G1B	ADPRM	CDIPT	DGKQ	CDS2	DGKB	DGKG	PLPP3
KEGG_ETHER_LIPID_METABOLISM	http://www.gsea-msigdb.org/gsea/msigdb/human/geneset/KEGG_ETHER_LIPID_METABOLISM	ENPP2	PAFAH1B1	PLPP3	LPCAT1	PLA2G3	ENPP6	LPCAT4	PLA2G4E	JMJD7-PLA2G4B	CHPT1	AGPS	PLA2G6	PAFAH1B3	PLA2G2E	PLA2G10	PAFAH2	PLA2G2A	PLA2G4A	PLA2G5	PLA2G12B	PLA2G4B	PLA2G7	PLA2G2F	PLPP1	PLPP2	PLA2G2C	PAFAH1B2	PLA2G2D	LPCAT2	PLD1	PLA2G12A	PLD2	PLA2G1B
KEGG_ARACHIDONIC_ACID_METABOLISM	http://www.gsea-msigdb.org/gsea/msigdb/human/geneset/KEGG_ARACHIDONIC_ACID_METABOLISM	EPHX2	CYP2E1	ALOX5	CYP4A11	CYP2J2	GGT1	PLA2G3	AKR1C3	PTGIS	ALOX12B	CYP4F2	CYP2C18	PTGES2	ALOX15B	ALOX15	JMJD7-PLA2G4B	PLA2G6	PLA2G2E	PLA2G10	PLA2G2A	PLA2G4A	PLA2G5	PTGS2	PLA2G12B	PTGS1	PLA2G4B	PLA2G2F	ALOX12	CYP2C9	GPX7	GPX6	CYP2C19	CYP2C8	CBR1	CYP2B6	CBR3	CYP2U1	PLA2G1B	LTA4H	PTGES	GPX5	GPX1	CYP4A22	GPX2	GPX3	GPX4	CYP4F3	PLA2G4E
KEGG_LINOLEIC_ACID_METABOLISM	http://www.gsea-msigdb.org/gsea/msigdb/human/geneset/KEGG_LINOLEIC_ACID_METABOLISM	CYP2E1	CYP3A5	CYP2J2	CYP3A4	PLA2G3	AKR1B10	CYP2C18	CYP1A2	ALOX15	PLA2G4E	JMJD7-PLA2G4B	PLA2G6	PLA2G2E	PLA2G10	PLA2G2A	PLA2G4A	CYP3A43	PLA2G5	PLA2G12B	PLA2G4B	PLA2G2F	PLA2G2C	PLA2G2D	CYP2C9	PLA2G12A	CYP2C19	CYP2C8	CYP3A7	PLA2G1B
KEGG_ALPHA_LINOLENIC_ACID_METABOLISM	http://www.gsea-msigdb.org/gsea/msigdb/human/geneset/KEGG_ALPHA_LINOLENIC_ACID_METABOLISM	JMJD7-PLA2G4B	PLA2G6	PLA2G2E	PLA2G10	PLA2G2A	PLA2G4A	PLA2G5	PLA2G12B	PLA2G4B	PLA2G2F	FADS2	ACOX3	PLA2G2C	PLA2G2D	PLA2G3	PLA2G12A	ACOX1	PLA2G4E	PLA2G1B
KEGG_SPHINGOLIPID_METABOLISM	http://www.gsea-msigdb.org/gsea/msigdb/human/geneset/KEGG_SPHINGOLIPID_METABOLISM	GAL3ST1	SGPP2	GLB1	GALC	SGMS2	GBA1	SPHK2	NEU2	PLPP3	NEU1	ACER2	UGCG	DEGS2	ARSA	SPHK1	SGPL1	NEU3	SMPD4	SGMS1	ACER3	CERK	SMPD2	ENPP7	DEGS1	SGPP1	NEU4	GLA	ACER1	PLPP1	ASAH1	PLPP2	SMPD1	B4GALT6	SPTLC2	SPTLC1	SMPD3	KDSR	UGT8	ASAH2
KEGG_GLYCOSPHINGOLIPID_BIOSYNTHESIS_LACTO_AND_NEOLACTO_SERIES	http://www.gsea-msigdb.org/gsea/msigdb/human/geneset/KEGG_GLYCOSPHINGOLIPID_BIOSYNTHESIS_LACTO_AND_NEOLACTO_SERIES	B3GNT4	B3GNT2	ST3GAL6	B4GALT1	B3GNT5	FUT9	FUT7	FUT6	FUT5	FUT4	FUT3	FUT2	FUT1	B4GAT1	GCNT2	B3GNT3	B3GALT5	ABO	B4GALT3	B4GALT2	ST3GAL4	B4GALT4	ST3GAL3	B3GALT2	B3GALT1	ST8SIA1
KEGG_GLYCOSPHINGOLIPID_BIOSYNTHESIS_GLOBO_SERIES	http://www.gsea-msigdb.org/gsea/msigdb/human/geneset/KEGG_GLYCOSPHINGOLIPID_BIOSYNTHESIS_GLOBO_SERIES	A4GALT	B3GALT5	GLA	FUT9	ST3GAL2	GBGT1	ST3GAL1	FUT2	FUT1	HEXB	NAGA	ST8SIA1	B3GALNT1	HEXA
KEGG_GLYCOSPHINGOLIPID_BIOSYNTHESIS_GANGLIO_SERIES	http://www.gsea-msigdb.org/gsea/msigdb/human/geneset/KEGG_GLYCOSPHINGOLIPID_BIOSYNTHESIS_GANGLIO_SERIES	ST6GALNAC4	ST6GALNAC3	ST6GALNAC6	B4GALNT1	GLB1	ST6GALNAC5	SLC33A1	ST3GAL5	ST3GAL2	ST3GAL1	HEXB	ST8SIA1	B3GALT4	ST8SIA5	HEXA
KEGG_RIBOFLAVIN_METABOLISM	http://www.gsea-msigdb.org/gsea/msigdb/human/geneset/KEGG_RIBOFLAVIN_METABOLISM	ACP4	ENPP3	ENPP1	ACP6	RFK	ACP3	FLAD1	TYR	MTMR7	MTMR6	PHPT1	MTMR1	ACP1	ACP2	ACP5	MTMR2
KEGG_NICOTINATE_AND_NICOTINAMIDE_METABOLISM	http://www.gsea-msigdb.org/gsea/msigdb/human/geneset/KEGG_NICOTINATE_AND_NICOTINAMIDE_METABOLISM	NMNAT1	NT5C2	ENPP3	ENPP1	BST1	NNT	AOX1	CD38	NT5M	NADSYN1	NUDT12	NT5C1B	NT5C3A	NMRK1	NT5C1A	QPRT	NAMPT	NT5C	NMNAT3	PNP	NMNAT2	NT5E	NADK	NNMT
KEGG_PANTOTHENATE_AND_COA_BIOSYNTHESIS	http://www.gsea-msigdb.org/gsea/msigdb/human/geneset/KEGG_PANTOTHENATE_AND_COA_BIOSYNTHESIS	PPCS	ENPP3	PANK3	PPCDC	ENPP1	VNN2	VNN1	PANK1	PANK4	UPB1	DPYS	COASY	DPYD	PANK2	BCAT1	BCAT2
KEGG_AMINOACYL_TRNA_BIOSYNTHESIS	http://www.gsea-msigdb.org/gsea/msigdb/human/geneset/KEGG_AMINOACYL_TRNA_BIOSYNTHESIS	CARS2	DARS2	RARS1	SARS1	VARS2	YARS2	WARS1	AARS1	FARSA	HARS1	SARS2	RARS2	NARS1	LARS2	FARSB	AARS2	YARS1	NARS2	GARS1	IARS2	KARS1	WARS2	TARS3	LARS1	VARS1	PARS2	MARS2	CARS1	IARS1	TARS2	SEPSECS	MTFMT	TARS1	DARS1	HARS2	PSTK	QARS1	EARS2	EPRS1	FARS2	MARS1
KEGG_BASAL_TRANSCRIPTION_FACTORS	http://www.gsea-msigdb.org/gsea/msigdb/human/geneset/KEGG_BASAL_TRANSCRIPTION_FACTORS	TBPL2	TAF1L	TAF2	TAF4	TAF7L	TAF1	TAF9B	GTF2A1L	STON1	TBP	GTF2A1	GTF2B	GTF2A2	TAF11	TAF12	TAF5L	TAF13	GTF2IRD1	TAF9	TAF10	GTF2H2	TAF7	GTF2H1	TAF6L	GTF2F2	GTF2F1	GTF2E2	TAF4B	TAF6	GTF2E1	TAF5	GTF2I	GTF2H4	TBPL1	GTF2H3
KEGG_NON_HOMOLOGOUS_END_JOINING	http://www.gsea-msigdb.org/gsea/msigdb/human/geneset/KEGG_NON_HOMOLOGOUS_END_JOINING	XRCC4	MRE11	POLL	POLM	NHEJ1	LIG4	FEN1	DNTT	XRCC5	RAD50	XRCC6	PRKDC	DCLRE1C
KEGG_SNARE_INTERACTIONS_IN_VESICULAR_TRANSPORT	http://www.gsea-msigdb.org/gsea/msigdb/human/geneset/KEGG_SNARE_INTERACTIONS_IN_VESICULAR_TRANSPORT	STX12	STX2	VAMP5	GOSR2	SNAP29	STX7	STX6	STX1A	STX11	STX16	VAMP1	VAMP3	BNIP1	STX3	VAMP2	STX10	VAMP7	SNAP47	SEC22B	VAMP4	VAMP8	YKT6	SNAP23	BET1L	STX18	GOSR1	SNAP25	USE1	STX5	STX4	STX19	VTI1B	BET1	VTI1A	TSNARE1	STX8	STX1B	STX17
KEGG_LYSOSOME	http://www.gsea-msigdb.org/gsea/msigdb/human/geneset/KEGG_LYSOSOME	PLA2G15	AP3B2	GGA1	SLC11A1	PPT1	MFSD8	CTSZ	NAGPA	IGF2R	ARSG	ATP6V0A1	CTSW	ATP6V0B	LGMN	CTSS	AP4S1	LAMP2	ATP6AP1	LAPTM5	AP1S3	CLTCL1	AP4B1	AP3B1	LAMP3	ATP6V0A4	CTSL	ABCB9	AP1B1	CTSK	SLC11A2	GNPTAB	SMPD1	CTSH	AP1G1	CTSG	CTSE	LAPTM4A	GM2A	LAMP1	CTSO	GGA2	CTSV	AP3M1	CTSC	GBA1	AP3D1	CD164	ATP6V1H
KEGG_CARDIAC_MUSCLE_CONTRACTION	http://www.gsea-msigdb.org/gsea/msigdb/human/geneset/KEGG_CARDIAC_MUSCLE_CONTRACTION	CACNA2D1	CACNB1	COX8A	CACNB2	UQCR10	COX7C	CACNB3	CACNB4	CACNG1	COX6CP3	FXYD2	CACNG8	RYR2	CACNG6	ATP2A2	CACNG7	TPM2	MT-CYB	TPM1	ATP1B2	ATP1B3	ATP1A4	ATP1B1	MT-CO2	COX7B	MT-CO1	COX7A1	COX7A2	COX8C	COX6C	MT-CO3	CACNA2D3	COX6B1	CACNA1D	SLC8A1	COX5B	SLC9A1	UQCR10P1	CACNA1C	TNNI3	CACNA1F	COX4I1	ATP1A1	CACNA2D2	CACNA1S	COX7B2	ATP1A3	TNNC1
KEGG_RENIN_ANGIOTENSIN_SYSTEM	http://www.gsea-msigdb.org/gsea/msigdb/human/geneset/KEGG_RENIN_ANGIOTENSIN_SYSTEM	LNPEP	ACE2	REN	ANPEP	CMA1	CTSA	CTSG	THOP1	AGT	AGTR1	ACE	AGTR2	NLN	ENPEP	CPA3	MAS1	MME
KEGG_CIRCADIAN_RHYTHM_MAMMAL	http://www.gsea-msigdb.org/gsea/msigdb/human/geneset/KEGG_CIRCADIAN_RHYTHM_MAMMAL	NPAS2	PER3	PER2	CSNK1D	CRY1	BHLHE41	BHLHE40	NR1D1	CRY2	CSNK1E	PER1	CLOCK	BMAL1
KEGG_TASTE_TRANSDUCTION	http://www.gsea-msigdb.org/gsea/msigdb/human/geneset/KEGG_TASTE_TRANSDUCTION	TAS2R60	GRM4	PLCB2	ADCY8	ADCY6	TAS2R42	TAS1R2	TAS1R1	TRPM5	ASIC2	PDE1A	CACNA1A	ITPR3	CACNA1B	TAS2R5	ADCY4	GNAT3	GNG13	TAS2R3	TAS2R9	TAS1R3	TAS2R1	KCNB1	TAS2R16	TAS2R4	SCNN1G	GNB3	PRKX	GNG3	SCNN1B	SCNN1A	TAS2R43	TAS2R40	TAS2R41	TAS2R39	TAS2R14	PRKACA	PRKACB	PRKACG	GNAS	TAS2R38	GNB1	TAS2R20	TAS2R50	TAS2R45	TAS2R8	TAS2R46	TAS2R7
KEGG_PROXIMAL_TUBULE_BICARBONATE_RECLAMATION	http://www.gsea-msigdb.org/gsea/msigdb/human/geneset/KEGG_PROXIMAL_TUBULE_BICARBONATE_RECLAMATION	SLC25A10	GLUD2	PCK2	CA2	CA4	PCK1	GLS2	FXYD2	MDH1	SLC38A3	ATP1A1	GLUD1	ATP1A3	SLC4A4	ATP1A2	GLS	ATP1B2	ATP1B3	ATP1A4	ATP1B1	AQP1	ATP1B4	SLC9A3
KEGG_PATHOGENIC_ESCHERICHIA_COLI_INFECTION	http://www.gsea-msigdb.org/gsea/msigdb/human/geneset/KEGG_PATHOGENIC_ESCHERICHIA_COLI_INFECTION	TUBA1A	PRKCA	KRT18	WAS	CLDN1	TUBB4A	TUBB4B	TUBB3	RHOA	CTTN	ROCK1	TUBB2A	WASL	LY96	ABL1	TUBA1B	ARPC4	CD14	ARPC5	ITGB1	ARPC1B	ARPC3	ACTG1	ARPC2	NCL	TUBB7P	TUBA3D	NCK1	YWHAQ	TLR5	TUBB2B	TUBAL3	CTNNB1	TUBA3C	TUBB8	TUBA8	TUBA4A	NCK2	TUBA1C	ACTB	ROCK2	TUBB1	HCLS1	EZR	ARHGEF2	ARPC1A	TLR4	TUBB6
KEGG_SYSTEMIC_LUPUS_ERYTHEMATOSUS	http://www.gsea-msigdb.org/gsea/msigdb/human/geneset/KEGG_SYSTEMIC_LUPUS_ERYTHEMATOSUS	CD80	CD86	H2BC26	CD28	MACROH2A1	H3Y2	H2AC1	H2AC7	H2AC25	H2AC8	FCGR1A	H2AC21	H3C14	H2AC19	C9	CTSG	H3Y1	H4C9	FCGR3B	FCGR2A	C8A	H3-4	C7	FCGR3A	C8G	FCGR2B	C8B	HLA-DRB4	HLA-DRB5	HLA-DRB3	C6	C5	ELANE	H4C16	C4B	C4A	H4C15	HLA-DPA1	H2AB3	HLA-DPB1	HLA-DQA1	HLA-DQA2	HLA-DQB1	H4C14	H2BC3	H2AX	H2AZ1	H2BC5
KEGG_PRIMARY_IMMUNODEFICIENCY	http://www.gsea-msigdb.org/gsea/msigdb/human/geneset/KEGG_PRIMARY_IMMUNODEFICIENCY	ZAP70	CD4	TNFRSF13C	IKBKG	IL2RG	RFXAP	TAP2	RFX5	CD8A	CD8B	TAP1	ICOS	UNG	IL7R	ADA	CD40LG	CD40	AICDA	BTK	BLNK	CD19	RAG2	RAG1	CD3D	CD3E	RFXANK	AIRE	CD79A	TNFRSF13B	JAK3	IGLL1	CIITA	LCK	PTPRC	DCLRE1C
KEGG_HYPERTROPHIC_CARDIOMYOPATHY_HCM	http://www.gsea-msigdb.org/gsea/msigdb/human/geneset/KEGG_HYPERTROPHIC_CARDIOMYOPATHY_HCM	CACNA2D1	CACNB1	CACNB2	CACNB3	CACNB4	CACNG1	TNF	ITGA9	IGF1	RYR2	CACNG8	LMNA	CACNG6	ATP2A2	CACNG7	ITGA4	TPM2	ITGA3	TPM1	ITGA2B	ITGA7	ITGA5	EMD	ITGA11	PRKAG2	DMD	CACNA2D3	CACNA1D	SLC8A1	CACNA1C	TNNI3	CACNA1F	ITGB3	CACNA2D2	CACNA1S	ITGB4	PRKAG3	TNNC1	ITGB5	ITGB6	ITGB7	ITGAV	ITGB1	TPM4	ACTC1	ACTG1	CACNA2D4	MYBPC3
KEGG_ARRHYTHMOGENIC_RIGHT_VENTRICULAR_CARDIOMYOPATHY_ARVC	http://www.gsea-msigdb.org/gsea/msigdb/human/geneset/KEGG_ARRHYTHMOGENIC_RIGHT_VENTRICULAR_CARDIOMYOPATHY_ARVC	CACNA2D1	CACNB1	CACNB2	CACNB3	CACNB4	CACNG1	ITGA9	CACNG8	RYR2	JUP	LMNA	CACNG6	ATP2A2	CACNG7	ITGA4	ITGA3	ITGA2B	ITGA7	LEF1	ITGA5	EMD	ACTN4	ITGA11	DSC2	DSG2	ACTN1	DMD	CACNA2D3	CACNA1D	SLC8A1	CACNA1C	CACNA1F	ITGB3	CACNA2D2	CACNA1S	ITGB4	ITGB5	ITGB6	ITGB7	ITGAV	ITGB1	TCF7	ACTG1	CACNA2D4	PKP2	CTNNA1	CDH2	TCF7L2
KEGG_DILATED_CARDIOMYOPATHY	http://www.gsea-msigdb.org/gsea/msigdb/human/geneset/KEGG_DILATED_CARDIOMYOPATHY	CACNA2D1	CACNB1	CACNB2	ADCY8	CACNB3	ADCY9	CACNB4	ADCY6	CACNG1	ADCY7	ADCY5	TNF	ITGA9	IGF1	RYR2	CACNG8	CACNG6	LMNA	CACNG7	ATP2A2	ADRB1	ITGA4	TPM2	ITGA3	TPM1	ITGA2B	ITGA7	ITGA5	EMD	ITGA11	DMD	CACNA2D3	CACNA1D	SLC8A1	CACNA1C	TNNI3	CACNA1F	ITGB3	CACNA2D2	CACNA1S	ITGB4	ADCY4	TNNC1	ITGB5	ITGB6	ITGB7	ITGAV	ITGB1
KEGG_GLYCOLYSIS_GLUCONEOGENESIS	http://www.gsea-msigdb.org/gsea/msigdb/human/geneset/KEGG_GLYCOLYSIS_GLUCONEOGENESIS	ACSS2	GCK	PGK2	PGK1	PDHB	PDHA1	PDHA2	PGM2	TPI1	ACSS1	FBP1	ADH1B	HK2	ADH1C	HK1	HK3	ADH4	PGAM2	ADH5	PGAM1	ADH1A	ALDOC	ALDH7A1	LDHAL6B	PKLR	LDHAL6A	ENO1	PKM	PFKP	BPGM	PCK2	PCK1	ALDH1B1	ALDH2	ALDH3A1	AKR1A1	FBP2	PFKM	PFKL	LDHC	GAPDH	ENO3	ENO2	PGAM4	ADH7	ADH6	LDHB	ALDH1A3
KEGG_CITRATE_CYCLE_TCA_CYCLE	http://www.gsea-msigdb.org/gsea/msigdb/human/geneset/KEGG_CITRATE_CYCLE_TCA_CYCLE	IDH3B	DLST	PCK2	CS	PDHB	PCK1	PDHA1	PDHA2	SUCLG2P2	FH	SDHD	OGDH	SDHB	IDH3A	SDHC	IDH2	IDH1	ACO1	ACLY	MDH2	DLD	MDH1	DLAT	OGDHL	PC	SDHA	SUCLG1	SUCLA2	SUCLG2	IDH3G	ACO2
KEGG_PENTOSE_PHOSPHATE_PATHWAY	http://www.gsea-msigdb.org/gsea/msigdb/human/geneset/KEGG_PENTOSE_PHOSPHATE_PATHWAY	RPE	RPIA	PGM2	PGLS	PRPS2	FBP2	PFKM	PFKL	TALDO1	TKT	FBP1	TKTL2	PGD	RBKS	ALDOA	ALDOC	ALDOB	H6PD	RPEL1	PRPS1L1	PRPS1	DERA	G6PD	PGM1	TKTL1	PFKP	GPI
KEGG_PENTOSE_AND_GLUCURONATE_INTERCONVERSIONS	http://www.gsea-msigdb.org/gsea/msigdb/human/geneset/KEGG_PENTOSE_AND_GLUCURONATE_INTERCONVERSIONS	UGT1A10	UGT1A8	RPE	UGT1A7	UGT1A6	UGT2B28	UGT1A5	CRYL1	UGDH	UGT2A1	GUSB	UGT1A9	DCXR	RPEL1	DHDH	UGT2B11	UGP2	XYLB	UGT2B10	AKR1B1	UGT2B7	UGT2B4	UGT2A3	UGT1A4	UGT2B17	UGT1A1	UGT1A3	UGT2B15
KEGG_FRUCTOSE_AND_MANNOSE_METABOLISM	http://www.gsea-msigdb.org/gsea/msigdb/human/geneset/KEGG_FRUCTOSE_AND_MANNOSE_METABOLISM	MPI	PMM2	PMM1	FBP2	PFKM	GMDS	PFKFB4	PFKL	MTMR6	TPI1	PHPT1	PFKFB3	FCSK	PFKFB2	MTMR1	PFKFB1	AKR1B10	FPGT	KHK	FBP1	MTMR2	HK2	HK3	HK1	ALDOA	ALDOC	ALDOB	MTMR7	GFUS	AKR1B1	SORD	GMPPA	PFKP	GMPPB
KEGG_GALACTOSE_METABOLISM	http://www.gsea-msigdb.org/gsea/msigdb/human/geneset/KEGG_GALACTOSE_METABOLISM	GCK	GALK1	GLB1	GALE	B4GALT1	PGM2	LALBA	PFKM	PFKL	MGAM	HK2	HK1	HK3	GALT	G6PC2	GLA	GANC	LCT	GALK2	G6PC1	UGP2	PGM1	AKR1B1	B4GALT2	GAA	PFKP
KEGG_ASCORBATE_AND_ALDARATE_METABOLISM	http://www.gsea-msigdb.org/gsea/msigdb/human/geneset/KEGG_ASCORBATE_AND_ALDARATE_METABOLISM	UGT1A10	UGT1A8	UGT1A7	UGT1A6	ALDH1B1	UGT2B28	ALDH2	UGT1A5	MIOX	UGDH	UGT2A1	ALDH9A1	ALDH3A2	UGT1A9	ALDH7A1	UGT2B11	UGT2B10	UGT2B7	UGT2B4	UGT2A3	UGT1A4	UGT1A1	UGT2B17	UGT1A3	UGT2B15
KEGG_FATTY_ACID_METABOLISM	http://www.gsea-msigdb.org/gsea/msigdb/human/geneset/KEGG_FATTY_ACID_METABOLISM	CPT1A	CPT1C	ACADS	ALDH1B1	ACADSB	ACADL	ALDH2	ACADM	CYP4A11	ACAT2	ACADVL	ACAT1	ACAA2	HADH	HADHB	HADHA	CYP4A22	ADH7	ADH6	ACSL6	ADH1B	ADH1C	ADH4	ECHS1	ADH5	ALDH9A1	ALDH3A2	ACSL5	ADH1A	EHHADH	GCDH	ALDH7A1	ACOX3	ACSL1	ACAA1	CPT2	CPT1B	ACOX1	ECI2	ECI1	ACSL3	ACSL4
KEGG_STEROID_BIOSYNTHESIS	http://www.gsea-msigdb.org/gsea/msigdb/human/geneset/KEGG_STEROID_BIOSYNTHESIS	SOAT1	LSS	SQLE	EBP	CYP51A1	DHCR7	CYP27B1	DHCR24	HSD17B7	MSMO1	FDFT1	SC5D	LIPA	CEL	TM7SF2	NSDHL	SOAT2
KEGG_PRIMARY_BILE_ACID_BIOSYNTHESIS	http://www.gsea-msigdb.org/gsea/msigdb/human/geneset/KEGG_PRIMARY_BILE_ACID_BIOSYNTHESIS	CYP46A1	SLC27A5	BAAT	CYP7B1	AKR1C4	HSD17B4	SCP2	AKR1D1	ACOX2	HSD3B7	CYP27A1	AMACR	CYP7A1	CYP8B1	CYP39A1	CH25H
KEGG_STEROID_HORMONE_BIOSYNTHESIS	http://www.gsea-msigdb.org/gsea/msigdb/human/geneset/KEGG_STEROID_HORMONE_BIOSYNTHESIS	SRD5A3	AKR1C4	CYP3A5	HSD3B2	UGT2B28	HSD3B1	COMT	SULT2B1	CYP3A4	CYP7A1	CYP11A1	AKR1C3	HSD11B2	SULT1E1	HSD11B1	HSD17B2	HSD17B3	CYP21A2	HSD17B1	CYP19A1	CYP17A1	CYP11B2	CYP11B1	HSD17B6	HSD17B7	UGT2B11	UGT2A3	UGT1A4	CYP3A7	UGT1A1	UGT1A3	UGT1A10	UGT1A8	UGT1A7	UGT1A6	UGT1A5	HSD17B8	AKR1C2	AKR1C1	CYP1A1	CYP1B1	STS	UGT2A1	SRD5A2	SRD5A1	CYP3A43	CYP7B1	UGT1A9
KEGG_OXIDATIVE_PHOSPHORYLATION	http://www.gsea-msigdb.org/gsea/msigdb/human/geneset/KEGG_OXIDATIVE_PHOSPHORYLATION	ATP6V1G1	UQCR10	NDUFA5	NDUFA4	COX6CP3	PPA2	ATP5MF	NDUFS7	MT-CYB	ATP6V0A1	ATP6V1G2	ATP6V0B	ATP5PO	MT-CO2	MT-CO1	ATP6AP1	COX8C	MT-CO3	COX5B	COX4I1	ATP6V0A4	ATP12A	MT-ATP6	MT-ATP8	ATP5PD	NDUFA2	NDUFA3	NDUFA1	ATP5MC1P5	UQCRQ	ATP6V1H	ATP5F1D	LHPP	ATP6V0D2	COX7A2L	ATP5MC3	ATP6V1C2	ATP5MC2	ATP5MC1	ATP5PB	ATP5F1E	COX5A	TCIRG1	UQCRHL	ATP4B	ATP6V1D	ATP4A	ATP5F1A
KEGG_PURINE_METABOLISM	http://www.gsea-msigdb.org/gsea/msigdb/human/geneset/KEGG_PURINE_METABOLISM	POLR2G	NT5C2	POLR2H	ENPP3	POLR2E	POLR2F	ENPP1	XDH	POLR2I	POLR2J	POLE3	ADSS2	PRPS2	ADSL	NME6	POLR1D	PNPT1	POLR2K	PDE11A	POLD3	POLR2L	AK1	NME1-NME2	AK2	AK4	POLA2	CANT1	AMPD1	AMPD3	AMPD2	NME4	GUCY2D	NME1	ATIC	NME2	DGUOK	POLR3C	NME3	POLR3G	POLR3F	PRUNE1	ADPRM	PDE4B	PDE4C	PDE3B	PDE4A	NUDT2	GMPR2
KEGG_PYRIMIDINE_METABOLISM	http://www.gsea-msigdb.org/gsea/msigdb/human/geneset/KEGG_PYRIMIDINE_METABOLISM	NT5C2	POLR2G	POLR2H	POLR2E	POLR2F	POLR2I	POLR2J	POLE3	TYMS	TXNRD1	NME6	POLR1D	PNPT1	POLR2K	DHODH	POLD3	POLR2L	NME1-NME2	POLA2	UPRT	CANT1	NME4	NME1	NME2	NME3	POLR3C	POLR3G	POLR3F	NUDT2	PRIM1	PRIM2	NME5	POLD4	DTYMK	CTPS1	POLA1	ENTPD8	POLE2	POLD1	POLD2	POLE	CAD	CMPK2	POLR1E	NT5C1A	POLR3A	DCTD	POLR2B
KEGG_ALANINE_ASPARTATE_AND_GLUTAMATE_METABOLISM	http://www.gsea-msigdb.org/gsea/msigdb/human/geneset/KEGG_ALANINE_ASPARTATE_AND_GLUTAMATE_METABOLISM	GLUD2	GFPT2	AGXT2	CPS1	GLS2	ABAT	ADSS2	ADSL	GLUD1	GLS	ASL	IL4I1	GPT	GFPT1	GPT2	DDO	ADSS1	ACY3	GAD1	GAD2	GOT2	AGXT	GLUL	NIT2	GOT1	ALDH4A1	CAD	ALDH5A1	ASS1	ASNS	PPAT	ASPA
KEGG_GLYCINE_SERINE_AND_THREONINE_METABOLISM	http://www.gsea-msigdb.org/gsea/msigdb/human/geneset/KEGG_GLYCINE_SERINE_AND_THREONINE_METABOLISM	ALAS1	ALAS2	GLYCTK	MAOB	AGXT2	MAOA	AOC2	GATM	SDS	AOC3	GNMT	SHMT1	GCAT	PHGDH	DMGDH	SHMT2	SRR	PSAT1	BHMT	GLDC	DLD	GAMT	PSPH	AGXT	SARDH	AMT	CHDH	CBS	CTH	PIPOX	DAO
KEGG_CYSTEINE_AND_METHIONINE_METABOLISM	http://www.gsea-msigdb.org/gsea/msigdb/human/geneset/KEGG_CYSTEINE_AND_METHIONINE_METABOLISM	AMD1	SRM	ADI1	AHCY	DNMT1	SDS	TRDMT1	DNMT3A	DNMT3B	LDHC	IL4I1	SMS	LDHB	ENOPH1	BHMT	GOT2	CDO1	APIP	GOT1	LDHAL6B	TAT	AHCYL1	MTAP	MAT2B	LDHA	MTR	CBS	MAT1A	AHCYL2	CTH	MAT2A	MPST	LDHAL6A	DNMT3L
KEGG_VALINE_LEUCINE_AND_ISOLEUCINE_DEGRADATION	http://www.gsea-msigdb.org/gsea/msigdb/human/geneset/KEGG_VALINE_LEUCINE_AND_ISOLEUCINE_DEGRADATION	AOX1	ALDH1B1	ACADS	ACADSB	ABAT	ALDH2	ACADM	ACAT2	HSD17B10	ACAT1	OXCT1	ACAA2	IL4I1	HADH	MCEE	HADHB	DBT	HADHA	ALDH6A1	HMGCL	IVD	BCKDHB	ACAD8	ECHS1	ALDH9A1	ALDH3A2	PCCB	HIBCH	DLD	HMGCS2	EHHADH	HMGCS1	PCCA	ALDH7A1	HIBADH	ACAA1	OXCT2	MMUT	MCCC2	BCAT1	AUH	BCAT2	BCKDHA	MCCC1
KEGG_VALINE_LEUCINE_AND_ISOLEUCINE_BIOSYNTHESIS	http://www.gsea-msigdb.org/gsea/msigdb/human/geneset/KEGG_VALINE_LEUCINE_AND_ISOLEUCINE_BIOSYNTHESIS	PDHB	VARS2	IARS2	PDHA1	PDHA2	LARS1	LARS2	VARS1	BCAT1	BCAT2	IARS1
KEGG_LYSINE_DEGRADATION	http://www.gsea-msigdb.org/gsea/msigdb/human/geneset/KEGG_LYSINE_DEGRADATION	SUV39H2	AASDHPPT	DLST	ALDH1B1	AASDH	ALDH2	ACAT2	PLOD2	PLOD1	TMLHE	EHMT2	ACAT1	KMT5A	HADH	SETMAR	OGDH	HADHA	BBOX1	AASS	ECHS1	ALDH9A1	ALDH3A2	KMT5B	SUV39H1	ASH1L	SETD1B	DOT1L	NSD2	EHHADH	OGDHL	SETD1A	GCDH	KMT5C	SETD7	ALDH7A1	NSD3	EHMT1	SETDB1	AADAT	SETD2	SETDB2	PLOD3	NSD1	PIPOX
KEGG_ARGININE_AND_PROLINE_METABOLISM	http://www.gsea-msigdb.org/gsea/msigdb/human/geneset/KEGG_ARGININE_AND_PROLINE_METABOLISM	SRM	AZIN2	GLUD2	GLS2	ARG1	ARG2	GLUD1	GLS	ASL	CKMT1A	P4HA2	SMS	CKB	NOS3	NOS2	NOS1	GOT2	GLUL	P4HA1	AOC1	ALDH7A1	LAP3	AGMAT	GOT1	PYCR1	ASS1	ALDH18A1	SAT1	NAGS	DAO	AMD1	MAOB	MAOA	CPS1	P4HA3	ALDH1B1	GATM	ALDH2	OTC	PRODH2	OAT	CKM	ACY1	SAT2	ALDH9A1	ALDH3A2	CKMT1B	PYCR3
KEGG_HISTIDINE_METABOLISM	http://www.gsea-msigdb.org/gsea/msigdb/human/geneset/KEGG_HISTIDINE_METABOLISM	CNDP1	MAOB	MAOA	ALDH1B1	ALDH2	METTL6	ALDH3A1	BUD23	HAL	HNMT	DDC	ACY3	ALDH1A3	METTL2B	ALDH3B1	ALDH3B2	ALDH9A1	ALDH3A2	HEMK1	LCMT2	UROC1	TRMT11	AOC1	ALDH7A1	FTCD	AMDHD1	ASPA	LCMT1	HDC
KEGG_TYROSINE_METABOLISM	http://www.gsea-msigdb.org/gsea/msigdb/human/geneset/KEGG_TYROSINE_METABOLISM	MAOB	MAOA	HPD	AOX1	AOC2	TYR	HGD	METTL6	ALDH3A1	COMT	AOC3	BUD23	IL4I1	GSTZ1	DDC	ADH7	DBH	ADH6	METTL2B	ADH1B	ALDH1A3	ADH1C	ALDH3B1	ADH4	ALDH3B2	ADH5	HEMK1	ADH1A	GOT2	LCMT2	TRMT11	GOT1	TYRP1	TAT	MIF	NAA80	PNMT	DCT	LCMT1	TPO	TH	FAH
KEGG_PHENYLALANINE_METABOLISM	http://www.gsea-msigdb.org/gsea/msigdb/human/geneset/KEGG_PHENYLALANINE_METABOLISM	ALDH1A3	ALDH3B1	ALDH3B2	MAOB	MAOA	HPD	GOT2	AOC2	ALDH3A1	AOC3	PAH	GOT1	PRDX6	TAT	MIF	NAA80	IL4I1	DDC
KEGG_TRYPTOPHAN_METABOLISM	http://www.gsea-msigdb.org/gsea/msigdb/human/geneset/KEGG_TRYPTOPHAN_METABOLISM	MAOB	MAOA	IDO2	AOX1	ALDH1B1	AANAT	ALDH2	WARS1	IDO1	CAT	ACAT2	ACAT1	IL4I1	HADH	OGDH	TPH1	HADHA	DDC	AFMID	CYP1A1	CYP1A2	CYP1B1	ASMT	ECHS1	ALDH9A1	KMO	ALDH3A2	WARS2	EHHADH	OGDHL	GCDH	ALDH7A1	AOC1	INMT	TDO2	HAAO	KYNU	AADAT	TPH2	ACMSD
KEGG_BETA_ALANINE_METABOLISM	http://www.gsea-msigdb.org/gsea/msigdb/human/geneset/KEGG_BETA_ALANINE_METABOLISM	CNDP1	SRM	ECHS1	ALDH9A1	ALDH3A2	GAD1	GAD2	AOC2	ALDH1B1	HIBCH	ABAT	EHHADH	ALDH2	ACADM	UPB1	ALDH7A1	AOC3	DPYS	DPYD	MLYCD	HADHA	SMS
KEGG_TAURINE_AND_HYPOTAURINE_METABOLISM	http://www.gsea-msigdb.org/gsea/msigdb/human/geneset/KEGG_TAURINE_AND_HYPOTAURINE_METABOLISM	GGT7	CSAD	GGT5	GGT1	GAD1	BAAT	GAD2	GGT6	CDO1	ADO
KEGG_SELENOAMINO_ACID_METABOLISM	http://www.gsea-msigdb.org/gsea/msigdb/human/geneset/KEGG_SELENOAMINO_ACID_METABOLISM	METTL6	AHCY	BUD23	SEPHS1	GGT1	SEPHS2	METTL2B	HEMK1	GGT6	LCMT2	PAPSS1	PAPSS2	TRMT11	MARS2	SCLY	AHCYL1	GGT7	GGT5	MAT2B	MAT1A	LCMT1	CBS	AHCYL2	CTH	MAT2A	MARS1
KEGG_GLUTATHIONE_METABOLISM	http://www.gsea-msigdb.org/gsea/msigdb/human/geneset/KEGG_GLUTATHIONE_METABOLISM	SRM	GGT1	GSTP1	GSTT2	GSTT1	GSTZ1	RRM2B	SMS	PGD	GSTO1	GSTA5	MGST2	LAP3	MGST1	MGST3	GSTA3	GSTM1	GPX7	GSTA4	GPX6	GSTM4	GGCT	GSTM3	GSTM2	GSTM5	GSTA1	GSTA2	GSR	GSS	RRM1	RRM2	GCLC	GSTK1	GPX5	TXNDC12	GPX1	GPX2	GPX3	IDH2	GPX4	IDH1	OPLAH	GCLM	GGT6	ANPEP	GGT7	GSTO2	GGT5
KEGG_STARCH_AND_SUCROSE_METABOLISM	http://www.gsea-msigdb.org/gsea/msigdb/human/geneset/KEGG_STARCH_AND_SUCROSE_METABOLISM	ENPP3	GCK	ENPP1	AMY2B	UGT2B28	PGM2	UXS1	UGDH	MGAM	GYS1	GYS2	HK2	HK3	HK1	GBA3	GUSB	TREH	AMY1A	AMY1B	AMY1C	AMY2A	UGT2B11	PYGB	PYGM	PYGL	UGT2A3	UGT1A4	UGT1A1	UGT1A3	UGT1A10	UGT1A8	UGT1A7	UGT1A6	PGM2L1	AGL	UGT1A5	SI	UGT2A1	GBE1	UGT1A9	G6PC2	GANC	G6PC1	UGP2	PGM1	UGT2B10	UGT2B7	UGT2B4
KEGG_AMINO_SUGAR_AND_NUCLEOTIDE_SUGAR_METABOLISM	http://www.gsea-msigdb.org/gsea/msigdb/human/geneset/KEGG_AMINO_SUGAR_AND_NUCLEOTIDE_SUGAR_METABOLISM	MPI	GCK	GFPT2	GALK1	GALE	PMM2	PGM2	PMM1	AMDHD2	GNPDA2	GMDS	UXS1	GNPNAT1	NANS	UGDH	CYB5R3	GFPT1	FCSK	NANP	CYB5R1	FPGT	HEXB	HEXA	HK2	HK1	HK3	GALT	GNE	NAGK	CHIT1	UAP1	RENBP	CHIA	NPL	UGP2	GALK2	GFUS	PGM1	CMAS	PGM3	GNPDA1	GMPPA	GPI	GMPPB
KEGG_GLYCOSAMINOGLYCAN_BIOSYNTHESIS_CHONDROITIN_SULFATE	http://www.gsea-msigdb.org/gsea/msigdb/human/geneset/KEGG_GLYCOSAMINOGLYCAN_BIOSYNTHESIS_CHONDROITIN_SULFATE	DSE	B3GALT6	CHPF	XYLT1	CHSY3	XYLT2	CHST14	B3GAT1	CHSY1	CHST11	CHPF2	CHST15	B4GALT7	CHST7	UST	CHST13	CSGALNACT2	B3GAT2	CSGALNACT1	CHST3	CHST12	B3GAT3
KEGG_GLYCOSAMINOGLYCAN_BIOSYNTHESIS_HEPARAN_SULFATE	http://www.gsea-msigdb.org/gsea/msigdb/human/geneset/KEGG_GLYCOSAMINOGLYCAN_BIOSYNTHESIS_HEPARAN_SULFATE	HS3ST5	EXT2	EXT1	NDST3	XYLT1	XYLT2	B3GAT1	NDST1	GLCE	HS3ST3B1	HS2ST1	HS6ST2	B3GAT3	HS3ST1	B3GALT6	HS3ST2	HS6ST1	HS3ST3A1	NDST2	NDST4	HS6ST3	B4GALT7	B3GAT2	EXTL1	EXTL2	EXTL3
KEGG_INOSITOL_PHOSPHATE_METABOLISM	http://www.gsea-msigdb.org/gsea/msigdb/human/geneset/KEGG_INOSITOL_PHOSPHATE_METABOLISM	PLCB2	PLCB1	INPP1	IPMK	PLCD1	PLCB3	PLCB4	MIOX	TPI1	INPP5A	INPP5B	INPP4A	INPPL1	SYNJ2	PIP4K2B	PLCD3	PIKFYVE	IMPA1	IMPA2	PIP5K1A	PIP5K1B	ISYNA1	INPP5J	INPP5K	SYNJ1	PLCD4	ITPKA	ITPKB	ITPK1	CDIPT	INPP4B	PLCE1	ALDH6A1	PIP5K1C	PIK3C3	PIK3C2B	PIK3C2G	PIP4K2A	PIK3C2A	PTEN	PIP4K2C	MINPP1	IPPK	PIK3CA	PIK3CB	PIK3CD	PLCG1	PLCG2
KEGG_PYRUVATE_METABOLISM	http://www.gsea-msigdb.org/gsea/msigdb/human/geneset/KEGG_PYRUVATE_METABOLISM	ACSS2	PCK2	ME3	GRHPR	PDHB	PCK1	PDHA1	ALDH1B1	PDHA2	HAGH	ALDH2	ACAT2	ACAT1	LDHC	LDHD	HAGHL	ACSS1	LDHB	ACYP2	ME1	ACYP1	ALDH9A1	ALDH3A2	ME2	DLD	MDH2	DLAT	MDH1	ALDH7A1	PC	GLO1	LDHAL6B	LDHA	ACACB	ACACA	PKLR	AKR1B1	LDHAL6A	PKM	ACOT12
KEGG_GLYOXYLATE_AND_DICARBOXYLATE_METABOLISM	http://www.gsea-msigdb.org/gsea/msigdb/human/geneset/KEGG_GLYOXYLATE_AND_DICARBOXYLATE_METABOLISM	ACO1	GLYCTK	MTHFD2	GRHPR	CS	HAO1	MDH2	MDH1	MTHFD2L	PGP	MTHFD1L	MTHFD1	HAO2	AFMID	HYI	ACO2
KEGG_PROPANOATE_METABOLISM	http://www.gsea-msigdb.org/gsea/msigdb/human/geneset/KEGG_PROPANOATE_METABOLISM	ACSS2	ALDH1B1	ABAT	SUCLG2P2	ALDH2	ACADM	ACAT2	ACAT1	LDHC	MCEE	HADHA	ALDH6A1	ACSS1	LDHB	ECHS1	ALDH9A1	ALDH3A2	PCCB	HIBCH	EHHADH	PCCA	ALDH7A1	LDHAL6B	SUCLG1	MLYCD	LDHA	SUCLA2	ACACB	MMUT	SUCLG2	ACACA	ACSS3	LDHAL6A
KEGG_BUTANOATE_METABOLISM	http://www.gsea-msigdb.org/gsea/msigdb/human/geneset/KEGG_BUTANOATE_METABOLISM	AACS	PDHB	ALDH1B1	ACADS	PDHA1	ABAT	PDHA2	ALDH2	ACAT2	ACAT1	OXCT1	HADH	BDH1	HADHA	ACSM1	HMGCL	AKR1B10	ECHS1	ALDH9A1	GAD1	ALDH3A2	ACSM3	GAD2	ACSM4	HMGCS2	EHHADH	HMGCS1	ALDH7A1	ALDH5A1	BDH2	OXCT2	ACSM2A	ACSM5	L2HGDH
KEGG_ONE_CARBON_POOL_BY_FOLATE	http://www.gsea-msigdb.org/gsea/msigdb/human/geneset/KEGG_ONE_CARBON_POOL_BY_FOLATE	MTHFD2	GART	TYMS	FTCD	ALDH1L1	MTHFS	MTFMT	AMT	MTHFD2L	DHFR	SHMT1	MTHFD1L	MTHFD1	MTR	ATIC	MTHFR	SHMT2
KEGG_FOLATE_BIOSYNTHESIS	http://www.gsea-msigdb.org/gsea/msigdb/human/geneset/KEGG_FOLATE_BIOSYNTHESIS	QDPR	ALPP	ALPG	DHFR	GGH	GCH1	FPGS	SPR	ALPL	PTS	ALPI
KEGG_RETINOL_METABOLISM	http://www.gsea-msigdb.org/gsea/msigdb/human/geneset/KEGG_RETINOL_METABOLISM	RPE65	CYP3A5	UGT2B28	CYP4A11	CYP3A4	RDH8	DHRS3	CYP2C18	ADH1B	ADH1C	ADH4	ADH5	DGAT2	ADH1A	BCO1	RDH10	CYP26A1	UGT2B11	CYP2C9	AWAT2	CYP26C1	CYP2C19	CYP2C8	CYP2B6	UGT2A3	CYP2A13	UGT1A4	CYP3A7	UGT1A1	UGT1A3	CYP26B1	DHRS9	UGT1A10	DGAT1	UGT1A8	UGT1A7	UGT1A6	ALDH1A1	RETSAT	RDH12	LRAT	RDH11	UGT1A5	CYP2A6	CYP2A7	CYP4A22	DHRS4	CYP1A1
KEGG_PORPHYRIN_AND_CHLOROPHYLL_METABOLISM	http://www.gsea-msigdb.org/gsea/msigdb/human/geneset/KEGG_PORPHYRIN_AND_CHLOROPHYLL_METABOLISM	ALAS1	COX10	UGT1A10	ALAS2	UGT1A8	UGT1A7	ALAD	UGT1A6	CPOX	BLVRA	UGT2B28	BLVRB	UGT1A5	UROS	HCCS	UGT2A1	GUSB	FTMT	UGT1A9	MMAB	FECH	HMOX1	HMOX2	UGT2B11	PPOX	FTH1	UGT2B10	UGT2B7	UROD	UGT2B4	COX15	HMBS	CP	UGT2A3	UGT1A4	EARS2	UGT2B17	UGT1A1	EPRS1	UGT2B15	UGT1A3
KEGG_TERPENOID_BACKBONE_BIOSYNTHESIS	http://www.gsea-msigdb.org/gsea/msigdb/human/geneset/KEGG_TERPENOID_BACKBONE_BIOSYNTHESIS	GGPS1	PDSS1	HMGCS2	IDI2	HMGCS1	MVK	ACAT2	ACAT1	FDPS	PDSS2	PMVK	DHDDS	MVD	HMGCR	IDI1
KEGG_LIMONENE_AND_PINENE_DEGRADATION	http://www.gsea-msigdb.org/gsea/msigdb/human/geneset/KEGG_LIMONENE_AND_PINENE_DEGRADATION	NAA80	ECHS1	ALDH9A1	ALDH3A2	HADHA	ALDH1B1	EHHADH	YOD1	ALDH2	ALDH7A1
KEGG_NITROGEN_METABOLISM	http://www.gsea-msigdb.org/gsea/msigdb/human/geneset/KEGG_NITROGEN_METABOLISM	CA5A	CA5B	CA6	CA12	CA7	GLUD2	CA2	CPS1	CA3	CA4	GLS2	GLUL	CA8	CA14	GLUD1	CA9	CA1	GLS	AMT	HAL	ASNS	CA13	CTH
KEGG_SULFUR_METABOLISM	http://www.gsea-msigdb.org/gsea/msigdb/human/geneset/KEGG_SULFUR_METABOLISM	SULT1E1	PAPSS1	SULT1A4	SULT1A3	PAPSS2	CHST11	SULT1A1	SULT2B1	SUOX	BPNT1	CHST13	SULT1A2	CHST12
KEGG_METABOLISM_OF_XENOBIOTICS_BY_CYTOCHROME_P450	http://www.gsea-msigdb.org/gsea/msigdb/human/geneset/KEGG_METABOLISM_OF_XENOBIOTICS_BY_CYTOCHROME_P450	CYP2F1	CYP2E1	AKR1C4	EPHX1	CYP3A5	UGT2B28	CYP3A4	GSTP1	GSTT2	GSTT1	AKR1C3	GSTZ1	CYP2C18	ADH1B	CYP2S1	ADH1C	ADH4	ADH5	GSTO1	ADH1A	GSTA5	MGST2	MGST1	MGST3	GSTA3	GSTM1	UGT2B11	CYP2C9	GSTA4	CYP2C19	GSTM4	CYP2C8	GSTM3	CYP2B6	GSTM2	UGT2A3	UGT1A4	UGT1A1	CYP3A7	UGT1A3	GSTM5	UGT1A10	UGT1A8	UGT1A7	GSTA1	UGT1A6	GSTA2	ALDH3A1
KEGG_DRUG_METABOLISM_CYTOCHROME_P450	http://www.gsea-msigdb.org/gsea/msigdb/human/geneset/KEGG_DRUG_METABOLISM_CYTOCHROME_P450	CYP2E1	CYP3A5	UGT2B28	CYP3A4	GSTP1	GSTT2	GSTT1	GSTZ1	CYP2C18	CYP2D6	ADH1B	FMO4	ADH1C	ADH4	ADH5	GSTO1	ADH1A	GSTA5	MGST2	MGST1	FMO1	FMO2	MGST3	FMO3	GSTA3	GSTM1	UGT2B11	CYP2C9	FMO5	GSTA4	CYP2C19	GSTM4	CYP2C8	GSTM3	CYP2B6	GSTM2	UGT2A3	CYP2A13	UGT1A4	UGT1A1	CYP3A7	UGT1A3	GSTM5	UGT1A10	UGT1A8	UGT1A7	GSTA1	UGT1A6
KEGG_DRUG_METABOLISM_OTHER_ENZYMES	http://www.gsea-msigdb.org/gsea/msigdb/human/geneset/KEGG_DRUG_METABOLISM_OTHER_ENZYMES	XDH	CYP3A5	UGT2B28	UPB1	CYP3A4	GMPS	UPP2	HPRT1	CDA	GUSB	IMPDH1	IMPDH2	CES2	UCKL1	UGT2B11	TPMT	NAT1	CES5A	CYP2A13	UGT2A3	UGT1A4	CYP3A7	UGT1A1	UGT1A3	UGT1A10	UGT1A8	UGT1A7	ITPA	UGT1A6	UGT1A5	CYP2A6	CYP2A7	DPYS	TYMP	DPYD	UMPS	UCK2	TK1	TK2	UPP1	UGT2A1	CYP3A43	CES1	UGT1A9	NAT2	UGT2B10	UGT2B7	UGT2B4
KEGG_BIOSYNTHESIS_OF_UNSATURATED_FATTY_ACIDS	http://www.gsea-msigdb.org/gsea/msigdb/human/geneset/KEGG_BIOSYNTHESIS_OF_UNSATURATED_FATTY_ACIDS	ACOT4	TECR	BAAT	ELOVL5	ELOVL6	ACOT2	YOD1	ELOVL2	FADS1	FADS2	ACOX3	PECR	SCD5	SCD	HACD1	ACAA1	HADHA	ACOT1	ACOT7	ACOX1	HSD17B12	HACD2
KEGG_ABC_TRANSPORTERS	http://www.gsea-msigdb.org/gsea/msigdb/human/geneset/KEGG_ABC_TRANSPORTERS	ABCA7	ABCG4	ABCD1	ABCC12	ABCA1	TAP2	ABCA6	TAP1	ABCA5	ABCB8	ABCA10	ABCD4	ABCA3	ABCB11	ABCD3	ABCA2	ABCC2	ABCC11	ABCC6	ABCC3	ABCC9	ABCG2	ABCC4	ABCC5	ABCA12	ABCG1	ABCB4	CFTR	ABCB1	ABCC1	ABCD2	ABCB6	ABCB7	ABCA8	ABCA4	ABCC8	ABCC10	ABCB10	ABCB9	ABCA13	ABCA9	ABCB5	ABCG5	ABCG8
KEGG_RIBOSOME	http://www.gsea-msigdb.org/gsea/msigdb/human/geneset/KEGG_RIBOSOME	RPL35	RPL23	RPL3	RPL3L	RPL31	RPL4	RPL5	RPL32	RPS10	RPL34	RPS11	RPS12	RPL36AL	RPS13	RPL35A	RPL37A	RPS15	RPL37	RPL38	RPL14	RPS15A	FAU	RPSA	RPS16	RPL27	RPS17	RPL26	RPL24	RPL29	RPL28	RPL27A	UBA52	RPL30	RPL36	RPS20	RPS19	RPS18	RPS4X	RSL24D1P11	RPS4Y1	RPS5	RPL22L1	RPL26L1	RPS6	RPLP2	RPL22	RPL23A	RPL18
KEGG_RNA_DEGRADATION	http://www.gsea-msigdb.org/gsea/msigdb/human/geneset/KEGG_RNA_DEGRADATION	LSM5	MPHOSPH6	MTREX	PATL1	EXOSC4	PNPT1	EXOSC2	SKIC2	XRN2	EXOSC5	SKIC3	LSM6	EXOSC3	EXOSC1	EDC4	CNOT3	CNOT2	XRN1	PARN	C1D	PAPOLA	DDX6	DCP1A	ZCCHC7	ENO1	CNOT4	CNOT7	TENT4A	EXOSC8	C1DP3	HSPA9	LSM1	CNOT6L	EXOSC6	LSM7	LSM8	CNOT9	LSM4	CNOT1	CNOT10	EXOSC7	LSM3	DIS3	ENO3	ENO2	CNOT6	C1DP2	LSM2
KEGG_RNA_POLYMERASE	http://www.gsea-msigdb.org/gsea/msigdb/human/geneset/KEGG_RNA_POLYMERASE	POLR2G	POLR2H	POLR2E	POLR2F	POLR1C	POLR2I	POLR2J	POLR3D	POLR1D	POLR3K	POLR3GL	POLR1B	POLR2K	POLR2J2	POLR2L	POLR3H	POLR1E	POLR2J3	POLR1A	POLR3C	POLR2B	POLR3A	POLR3G	POLR3B	POLR2A	POLR3F	POLR2D	POLR2C	POLR1H
KEGG_DNA_REPLICATION	http://www.gsea-msigdb.org/gsea/msigdb/human/geneset/KEGG_DNA_REPLICATION	DNA2	POLE4	POLE3	PRIM1	PRIM2	POLD4	RFC4	RFC5	RPA1	POLA1	RPA3	POLD3	RNASEH2B	RPA2	PCNA	RPA4	RNASEH1	RNASEH2C	MCM4	POLE2	MCM3	MCM6	MCM5	POLA2	MCM7	POLD1	POLD2	RNASEH2A	POLE	RFC1	RFC3	RFC2	MCM2	FEN1	LIG1	SSBP1
KEGG_SPLICEOSOME	http://www.gsea-msigdb.org/gsea/msigdb/human/geneset/KEGG_SPLICEOSOME	EFTUD2	LSM5	SF3A1	HNRNPA1L2	SF3B2	PRPF19	SNRNP27	HNRNPA3	LSM6	USP39	DDX42	NCBP1	SF3B1	MAGOH	CDC40	SF3B3	SRSF9	ACIN1	TXNL4A	TCERG1	U2AF2	RBM17	PRPF38B	THOC1	PLRG1	CCDC12	MAGOHB	HSPA8	LSM7	CHERP	LSM8	PQBP1	RBMX	LSM4	EIF4A3	SF3A3	DDX46	RBM25	PRPF40A	THOC3	SNU13	PRPF40B	LSM2	SRSF8	SF3A2	SMNDC1	BCAS2	NCBP2
KEGG_PROTEASOME	http://www.gsea-msigdb.org/gsea/msigdb/human/geneset/KEGG_PROTEASOME	PSMD11	PSMD12	PSMC1P4	PSMD13	PSMB11	PSMA1	PSMD4	POMP	PSMD6	PSMD7	PSMA5	PSMD8	PSMA4	PSMA3	PSMA2	PSMF1	IFNG	PSME4	PSME3	PSMB10	PSMB9	PSMD2	PSMD3	PSMC6	PSMD1	PSMC4	PSMB3	PSMC5	PSMD14	PSMB2	PSME1	PSMC3	PSMB5	PSME2	PSMB4	SEM1	PSMC1	PSMB7	PSMC2	PSMB6	PSMB8	PSMA6	PSMA7	PSMB1	PSMA8	PSMA6P4
KEGG_PROTEIN_EXPORT	http://www.gsea-msigdb.org/gsea/msigdb/human/geneset/KEGG_PROTEIN_EXPORT	SRPRA	IMMP1L	SRP9P1	SRP9	SRP14	SEC61B	SEC63	SRPRB	SRP19	SRP54	SEC61G	HSPA5	IMMP2L	SEC61A2	OXA1L	SEC11A	SPCS1	SEC11C	SPCS2	SEC62	SPCS3	SEC61A1	SRP72	SRP68
KEGG_PPAR_SIGNALING_PATHWAY	http://www.gsea-msigdb.org/gsea/msigdb/human/geneset/KEGG_PPAR_SIGNALING_PATHWAY	SLC27A5	SLC27A4	SORBS1	ACADL	CYP4A11	ACADM	APOA2	CD36	FADS2	APOA1	CYP7A1	SLC27A1	SCD	CYP8B1	UCP1	DBI	NR1H3	ACSL6	ME1	MMP1	GK	GK2	APOA5	RXRB	RXRG	PLTP	PDPK1	RXRA	ILK	APOC3	ACOX2	ACOX3	CYP27A1	OLR1	CPT2	ACAA1	CPT1B	ANGPTL4	SLC27A2	LPL	FABP1	CPT1A	PCK2	FABP4	CPT1C	FABP2	PCK1	SCP2
KEGG_BASE_EXCISION_REPAIR	http://www.gsea-msigdb.org/gsea/msigdb/human/geneset/KEGG_BASE_EXCISION_REPAIR	NEIL2	MPG	SMUG1	XRCC1	POLE4	HMGB1	POLE3	POLD4	MBD4	OGG1	UNG	POLD3	PCNA	NEIL1	POLE2	PARP4	PARP3	PARP2	POLB	APEX1	POLL	POLD1	POLD2	POLE	NEIL3	TDG	APEX2	LIG3	HMGB1P1	NTHL1	HMGB1P40	FEN1	LIG1	MUTYH	PARP1
KEGG_NUCLEOTIDE_EXCISION_REPAIR	http://www.gsea-msigdb.org/gsea/msigdb/human/geneset/KEGG_NUCLEOTIDE_EXCISION_REPAIR	MNAT1	POLE4	ERCC4	POLE3	ERCC3	ERCC6	ERCC5	GTF2H5	POLD4	ERCC2	RFC4	CETN2	RFC5	RPA1	RAD23B	RBX1	DDB2	RPA3	POLD3	RPA2	RAD23A	PCNA	RPA4	DDB1	POLE2	ERCC1	POLD1	POLD2	POLE	RFC1	RFC3	RFC2	XPC	XPA	GTF2H2	GTF2H1	CDK7	LIG1	CUL4A	CUL4B	ERCC8	CCNH	GTF2H4	GTF2H3
KEGG_MISMATCH_REPAIR	http://www.gsea-msigdb.org/gsea/msigdb/human/geneset/KEGG_MISMATCH_REPAIR	MLH3	POLD1	MLH1	POLD2	RFC1	MSH2	RFC3	RFC2	MSH3	POLD4	PMS2	RFC4	LIG1	RFC5	RPA1	MSH6	RPA3	POLD3	RPA2	PCNA	SSBP1	RPA4	EXO1
KEGG_HOMOLOGOUS_RECOMBINATION	http://www.gsea-msigdb.org/gsea/msigdb/human/geneset/KEGG_HOMOLOGOUS_RECOMBINATION	RAD54L	XRCC3	RAD51B	NBN	RAD52	RAD51D	XRCC2	POLD4	BLM	EME1	RPA1	RAD51	POLD3	RAD50	RPA3	RPA2	RPA4	RAD51C	MRE11	BRCA2	POLD1	POLD2	MUS81	TOP3A	RAD54B	SEM1	TOP3B	SSBP1
KEGG_MAPK_SIGNALING_PATHWAY	http://www.gsea-msigdb.org/gsea/msigdb/human/geneset/KEGG_MAPK_SIGNALING_PATHWAY	JUN	MEF2C	ELK4	ELK1	JUND	GADD45B	MAP3K20	STMN1	RRAS2	MAP3K5	MAP3K1	MAP3K3	MAP3K4	MAP3K7	MAP3K8	AKT1	AKT2	ARRB2	CD14	ARRB1	NRAS	DUSP16	CHP2	RASGRP3	NFKB2	NFKB1	MYC	NFATC4	MAPK14	FLNC	FLNA	KRAS	FLNB	PRKX	TRAF6	TGFB2	DUSP1	DUSP2	TGFB1	TRAF2	BDNF	TAB2	ECSIT	TGFBR2	DUSP7	TGFBR1	DUSP5	DUSP6
KEGG_ERBB_SIGNALING_PATHWAY	http://www.gsea-msigdb.org/gsea/msigdb/human/geneset/KEGG_ERBB_SIGNALING_PATHWAY	JUN	SOS2	PAK3	RAF1	PRKCB	BTC	SHC1	PRKCA	ELK1	NRG1	PAK2	MTOR	PAK4	MAP2K4	EIF4EBP1	BAD	PRKCG	NRG3	MAPK9	ERBB4	MAPK10	PTK2	ERBB2	ERBB3	MAP2K2	TGFA	BRAF	MAP2K1	MAP2K7	ABL1	NRG2	AKT1	ABL2	AKT2	SHC4	RPS6KB1	RPS6KB2	AKT3	NRAS	GRB2	AREG	STAT5B	MAPK3	STAT5A	PAK6	SOS1	MYC	MAPK1
KEGG_CALCIUM_SIGNALING_PATHWAY	http://www.gsea-msigdb.org/gsea/msigdb/human/geneset/KEGG_CALCIUM_SIGNALING_PATHWAY	CALM2	PTGFR	BST1	PTGER1	F2R	CALM1	PTGER3	ATP2A1	OXTR	PPP3R2	P2RX4	TACR3	P2RX5	PPP3CC	ADRB3	ATP2A3	P2RX1	PPP3R1	ADRB2	ATP2A2	P2RX3	ADRB1	TACR1	TACR2	SPHK1	CCKAR	CCKBR	NTSR1	PDGFRB	VDAC2P5	SLC8A1	ITPR3	SLC8A3	PLCD3	EDNRA	P2RX7	CHP2	DRD1	DRD5	TRHR	EDNRB	PHKB	PHKA2	PHKA1	GNA15	GNA11	VDAC1	VDAC2
KEGG_CYTOKINE_CYTOKINE_RECEPTOR_INTERACTION	http://www.gsea-msigdb.org/gsea/msigdb/human/geneset/KEGG_CYTOKINE_CYTOKINE_RECEPTOR_INTERACTION	CCL26	TNFSF13	HGF	CCL3L1	TNFSF12	TNFRSF8	TNFSF10	CCL2	TNFSF8	TNFSF9	CCL3	TNFSF14	IL21R	CCL5	CCL4	CCL13	IL17RB	CCL11	CCL8	CCL7	TNFRSF17	TNFSF11	IL23A	CTF1	FLT1	CCL14	FLT3	CCL15	FLT3LG	FLT4	IL22	CD27	CCL18	CCL17	CCL20	CCL19	CCL21	CCL23	CCL22	TPO	CCL16	CSF2	CSF1R	TNFRSF13C	IL13RA1	CSF1	PRLR	PRL
KEGG_CHEMOKINE_SIGNALING_PATHWAY	http://www.gsea-msigdb.org/gsea/msigdb/human/geneset/KEGG_CHEMOKINE_SIGNALING_PATHWAY	CCL26	STAT3	STAT1	STAT2	CCL3L1	CCL2	GNB4	CCL3	GRK3	GRK2	CCL5	CCL4	CX3CR1	CCL13	CCL11	CCL8	CCL7	CCL3L3	ROCK1	PTK2	BRAF	CXCL14	VAV1	CCL14	CCL15	IKBKB	AKT1	AKT2	JAK3	SHC4	DOCK2	JAK2	CCL18	GRK7	ARRB2	CCL17	ARRB1	CCL20	VAV2	CCL19	AKT3	NRAS	CCL21	CCL23	TIAM1	CCL22	GNG13	STAT5B
KEGG_PHOSPHATIDYLINOSITOL_SIGNALING_SYSTEM	http://www.gsea-msigdb.org/gsea/msigdb/human/geneset/KEGG_PHOSPHATIDYLINOSITOL_SIGNALING_SYSTEM	PLCB2	CALM2	INPP1	PLCB1	PLCD1	PRKCB	PRKCA	PLCB3	CALM1	PLCB4	DGKZ	INPP5A	DGKE	INPP5B	DGKD	INPP4A	PRKCG	INPPL1	DGKH	INPP5D	SYNJ2	PIP4K2B	ITPR3	PLCD3	PIKFYVE	IMPA1	IMPA2	PIP5K1A	PIP5K1B	INPP5J	CDS1	INPP5K	SYNJ1	PLCD4	ITPKA	PIK3R5	ITPKB	ITPK1	CDIPT	ITPR1	ITPR2	DGKQ	CDS2	INPP4B	DGKB	DGKG	DGKA	DGKI
KEGG_NEUROACTIVE_LIGAND_RECEPTOR_INTERACTION	http://www.gsea-msigdb.org/gsea/msigdb/human/geneset/KEGG_NEUROACTIVE_LIGAND_RECEPTOR_INTERACTION	PTGFR	PTGER2	PTGER1	PTGER4	PTGER3	CALCRL	TACR3	PTGIR	ADRB3	ADRB2	HRH4	ADRA2C	ADRB1	TACR1	ADRA2A	ADRA2B	TACR2	GPR35	THRB	THRA	PTH2R	PTH1R	PRSS3	PRSS2	NPY5R	PRSS1	CGA	NPY1R	NPY2R	RXFP1	MCHR1	LPAR4	DRD1	DRD2	DRD3	DRD4	DRD5	TRHR	NMUR2	SSTR2	SSTR3	SSTR1	PRLR	PRL	C5AR1	UTS2R	BDKRB1	BDKRB2
KEGG_CELL_CYCLE	http://www.gsea-msigdb.org/gsea/msigdb/human/geneset/KEGG_CELL_CYCLE	CDC16	CDC7	CDC45	GADD45B	DBF4	ANAPC1	CREBBP	MDM2	ABL1	SMC1B	SKP1P2	GADD45G	ATM	ATR	ANAPC7	RBL2	ANAPC5	RBL1	MYC	CDC14B	SMC1A	CDC14A	SKP1	TGFB2	TGFB1	GADD45A	STAG1	PLK1	RBX1	STAG2	TGFB3	MCM4	ORC6	CCND1	MAD1L1	MCM3	MCM6	MCM5	YWHAB	CCNA2	MCM7	BUB1	CHEK1	WEE2	MCM2	PTTG1	CDC27	CDC25B
KEGG_OOCYTE_MEIOSIS	http://www.gsea-msigdb.org/gsea/msigdb/human/geneset/KEGG_OOCYTE_MEIOSIS	CDC16	CALM2	CALM1	IGF1	RPS6KA6	PPP3R2	PPP3CC	SLK	PPP3R1	IGF1R	ANAPC1	SPDYC	ITPR3	SMC1B	SKP1P2	CHP2	ANAPC7	ANAPC5	FBXO43	SMC1A	REC8	MAPK12	BTRC	PRKX	SKP1	FBXW11	CALML5	ADCY3	ADCY2	PLK1	ADCY1	RBX1	STAG3	PGR	YWHAB	CAMK2A	BUB1	CAMK2B	CAMK2D	CAMK2G	PRKACA	PRKACB	PRKACG	FBXO5	SGO1	PTTG1	CALML3	CDC27
KEGG_P53_SIGNALING_PATHWAY	http://www.gsea-msigdb.org/gsea/msigdb/human/geneset/KEGG_P53_SIGNALING_PATHWAY	CASP9	CASP8	SFN	TSC2	IGF1	CDK1	GADD45B	RCHY1	ZMAT3	IGFBP3	RRM2B	ADGRB1	TP73	SERPINB5	RPRM	PPM1D	BID	MDM4	BAX	MDM2	TP53AIP1	CASP3	TP53I3	PMAIP1	PIDD1	COP1	PERP	GADD45G	EI24	SESN2	ATM	ATR	SESN3	CHEK2	APAF1	CDKN2A	RRM2	CDKN1A	BBC3	GADD45A	TNFRSF10B	DDB2	GTSE1	SIAH1	CCND1	CD82	PTEN	CDK2
KEGG_UBIQUITIN_MEDIATED_PROTEOLYSIS	http://www.gsea-msigdb.org/gsea/msigdb/human/geneset/KEGG_UBIQUITIN_MEDIATED_PROTEOLYSIS	CDC16	KLHL13	PIAS3	UBA6	UBE2L6	BIRC3	HERC1	XIAP	PML	HERC2	PRPF19	ANAPC1	UBE2S	UBE2O	UBE2M	UBE2Q2	MAP3K1	UBE4A	BRCA1	MDM2	UBE2K	UBE2D4	UBOX5	KLHL9	UBR5	UBE3A	UBE2R2	COP1	TRIM37	FBXW8	UBE2E3	SKP1P2	ANAPC7	ANAPC5	UBE2QL1	PIAS1	SMURF1	STUB1	UBE2G2	BTRC	UBE2G1	UBE2I	SOCS1	UBE2H	UBE2J2	SKP1	TRAF6	FBXW11
KEGG_REGULATION_OF_AUTOPHAGY	http://www.gsea-msigdb.org/gsea/msigdb/human/geneset/KEGG_REGULATION_OF_AUTOPHAGY	ATG4A	ULK3	BECN1	IFNA5	IFNA4	IFNA2	GABARAPL1	ATG12	IFNG	IFNA1	ATG4B	PRKAA2	PRKAA1	GABARAPL2	PIK3C3	INS	ATG5	ULK1	PIK3R4	ATG7	IFNA17	IFNA21	IFNA6	IFNA7	IFNA8	IFNA10	IFNA13	IFNA14	ULK2	IFNA16	ATG4C	ATG4D	BECN2	ATG3	GABARAP
KEGG_ENDOCYTOSIS	http://www.gsea-msigdb.org/gsea/msigdb/human/geneset/KEGG_ENDOCYTOSIS	F2R	EPN3	IQSEC1	IQSEC3	GRK3	GRK2	ADRB3	ADRB2	EPN2	STAMBP	ADRB1	IGF1R	CLTCL1	HGS	VPS37C	MVB12B	PIP4K2B	RUFY1	SMAP2	HLA-G	FLT1	STAM	MDM2	PIKFYVE	VPS37D	PIP5K1A	VPS28	CHMP2B	MVB12A	PIP5K1B	RAB11FIP1	ACAP1	ARRB2	AP2A2	GRK7	ARRB1	AP2B1	AP2A1	EEA1	GRK1	CSF1R	SMURF1	SH3GLB1	VPS4A	ARFGAP3	DNM2	HSPA8	VPS36
KEGG_PEROXISOME	http://www.gsea-msigdb.org/gsea/msigdb/human/geneset/KEGG_PEROXISOME	EPHX2	XDH	BAAT	MVK	CAT	NUDT19	PMVK	PEX16	HAO2	FAR2	PRDX5	HMGCL	PHYH	DDO	ACSL6	AGPS	SOD1	SOD2	MPV17L	NOS2	HAO1	HSD17B4	CRAT	PAOX	ACOX2	PEX11G	ACOX3	AMACR	PEX5	MLYCD	ACOT8	ACAA1	SLC27A2	SLC25A17	MPV17	PIPOX	FAR1	DAO	ABCD1	DECR2	SCP2	HACL1	GSTK1	PEX1	NUDT12	ABCD4	ABCD3	PEX11B
KEGG_MTOR_SIGNALING_PATHWAY	http://www.gsea-msigdb.org/gsea/msigdb/human/geneset/KEGG_MTOR_SIGNALING_PATHWAY	TSC2	IGF1	RPS6KA6	MTOR	EIF4B	EIF4E	EIF4EBP1	RICTOR	INS	PGF	ULK1	RHEB	BRAF	HIF1A	PDPK1	RPTOR	AKT1	AKT2	RPS6KA2	RPS6KA3	RPS6KB1	MLST8	AKT3	RPS6KB2	TSC1	ULK2	CAB39	MAPK3	CAB39L	RPS6	MAPK1	RPS6KA1	PIK3R5	ULK3	EIF4E1B	STK11	EIF4E2	VEGFA	PRKAA2	VEGFC	PRKAA1	VEGFB	STRADA	PIK3R3	VEGFD	DDIT4	PIK3CA	PIK3CB
KEGG_APOPTOSIS	http://www.gsea-msigdb.org/gsea/msigdb/human/geneset/KEGG_APOPTOSIS	CASP10	CASP9	CASP8	CASP7	CHUK	PRKAR2B	TNF	TNFSF10	BIRC3	XIAP	PPP3R2	PPP3CC	PPP3R1	MYD88	FADD	CFLAR	RIPK1	BAD	IRAK4	BID	BAX	IKBKB	CASP6	IL1A	AKT1	CASP3	AKT2	TNFRSF1A	AKT3	CHP2	ATM	ENDOG	NFKB1	NFKBIA	CAPN2	PIK3R5	IKBKG	CAPN1	IL3RA	IL3	RELA	ENDOD1	APAF1	PRKX	CSF2RB	TNFRSF10A	TRAF2	TNFRSF10D
KEGG_VASCULAR_SMOOTH_MUSCLE_CONTRACTION	http://www.gsea-msigdb.org/gsea/msigdb/human/geneset/KEGG_VASCULAR_SMOOTH_MUSCLE_CONTRACTION	CALM2	CALD1	CALM1	CYP4A11	CALCRL	PTGIR	PPP1R14A	JMJD7-PLA2G4B	ROCK1	PLA2G6	PLA2G2E	IRAG1	PLA2G10	BRAF	ITPR3	PLA2G4B	MYL6B	PLA2G2F	EDNRA	GNA12	GNA11	GNA13	PRKX	GUCY1A2	MYLK	ADCY3	MYL6	CALML5	ADCY2	ADCY1	PLA2G4E	KCNMB3	PRKACA	GNAQ	PRKACB	PRKACG	GNAS	CALML3	PLA2G2D	PLA2G12A	AGTR1	MYH11	CALM3	PLCB2	KCNMB2	ADCY8	PLCB1	ADCY9
KEGG_WNT_SIGNALING_PATHWAY	http://www.gsea-msigdb.org/gsea/msigdb/human/geneset/KEGG_WNT_SIGNALING_PATHWAY	JUN	LRP5	LRP6	PPP3R2	SFRP2	SFRP1	PPP3CC	VANGL1	PPP3R1	FZD1	FZD4	APC2	FZD6	FZD7	SENP2	FZD8	LEF1	CREBBP	FZD9	PRICKLE1	CTBP2	ROCK1	CTBP1	WNT9B	WNT9A	CTNNBIP1	DAAM2	TBL1XR1	MMP7	CER1	MAP3K7	VANGL2	WNT2B	WNT11	WNT10B	DKK2	SKP1P2	CHP2	AXIN1	AXIN2	DKK4	NFAT5	MYC	SOX17	CSNK2A1	CSNK2A2	NFATC4	CSNK1A1
KEGG_DORSO_VENTRAL_AXIS_FORMATION	http://www.gsea-msigdb.org/gsea/msigdb/human/geneset/KEGG_DORSO_VENTRAL_AXIS_FORMATION	SOS2	NOTCH4	NOTCH3	NOTCH2	EGFR	NOTCH1	KRAS	FMN2	ETV7	PIWIL3	ETV6	PIWIL2	MAP2K1	PIWIL1	GRB2	SPIRE2	CPEB1	MAPK3	ETS1	ETS2	SPIRE1	SOS1	PIWIL4	MAPK1
KEGG_NOTCH_SIGNALING_PATHWAY	http://www.gsea-msigdb.org/gsea/msigdb/human/geneset/KEGG_NOTCH_SIGNALING_PATHWAY	HES5	DTX3	NOTCH4	DTX3L	NOTCH3	NOTCH2	EP300	HES1	NOTCH1	NUMB	PSEN2	PSEN1	PTCRA	SNW1	APH1A	KAT2A	ADAM17	RFNG	RBPJ	DTX1	CREBBP	DTX2	MAML1	CTBP2	NCOR2	CTBP1	DVL3	JAG2	DVL2	NUMBL	MAML2	KAT2B	DLL4	PSENEN	DLL3	DVL1	CIR1	DLL1	LFNG	JAG1	MAML3	HDAC1	HDAC2	NCSTN	DTX4	MFNG	RBPJL
KEGG_HEDGEHOG_SIGNALING_PATHWAY	http://www.gsea-msigdb.org/gsea/msigdb/human/geneset/KEGG_HEDGEHOG_SIGNALING_PATHWAY	CSNK1A1L	HHIP	PTCH2	GAS1	WNT3A	ZIC2	WNT9B	WNT9A	LRP2	CSNK1G1	WNT2B	WNT11	WNT10B	IHH	SMO	WNT10A	WNT4	CSNK1G3	SHH	WNT1	CSNK1D	RAB23	CSNK1A1	CSNK1G2	CSNK1E	BMP8A	GSK3B	WNT7A	BTRC	WNT7B	WNT8A	WNT8B	WNT2	WNT3	PRKX	WNT5A	WNT6	FBXW11	STK36	WNT5B	GLI1	DHH	PRKACA	PRKACB	SUFU	BMP4	PRKACG	BMP2
KEGG_TGF_BETA_SIGNALING_PATHWAY	http://www.gsea-msigdb.org/gsea/msigdb/human/geneset/KEGG_TGF_BETA_SIGNALING_PATHWAY	TFDP1	NOG	TNF	GDF7	INHBB	INHBC	COMP	INHBA	THBS4	RHOA	CREBBP	ROCK1	ID1	ID2	RPS6KB1	RPS6KB2	CUL1	SKP1P2	ID4	SMAD3	MAPK3	RBL2	SMAD4	RBL1	NODAL	SMAD1	MYC	SMAD2	MAPK1	SMURF2	SMURF1	EP300	BMP8A	GDF5	SKP1	CHRD	TGFB2	TGFB1	IFNG	CDKN2B	PPP2CB	PPP2CA	PPP2R1A	ID3	SMAD5	RBX1	FST	PITX2
KEGG_AXON_GUIDANCE	http://www.gsea-msigdb.org/gsea/msigdb/human/geneset/KEGG_AXON_GUIDANCE	UNC5B	PLXNB2	PPP3R2	PPP3CC	PPP3R1	PAK4	NGEF	SEMA4C	SEMA4A	PLXNC1	ROCK1	ABLIM3	PTK2	ROBO1	SLIT2	ROBO2	PLXNA1	ABL1	PLXNA2	PLXNB3	PLXNB1	SEMA3G	ITGB1	SEMA3F	NRAS	ROBO3	CHP2	NFAT5	SEMA6D	RHOD	PAK6	PLXNA3	NCK1	NFATC4	NTNG1	SEMA6A	NFATC3	KRAS	SRGAP3	L1CAM	CFL2	CFL1	GNAI1	UNC5A	GNAI2	RND1	NCK2	MET
KEGG_VEGF_SIGNALING_PATHWAY	http://www.gsea-msigdb.org/gsea/msigdb/human/geneset/KEGG_VEGF_SIGNALING_PATHWAY	CASP9	RAF1	PRKCB	PRKCA	PPP3R2	PPP3CC	PPP3R1	SH2D2A	PLA2G3	SPHK1	BAD	PRKCG	JMJD7-PLA2G4B	PLA2G6	RAC2	PTK2	PLA2G2E	PLA2G10	NOS3	MAPK11	MAP2K2	PLA2G2A	RAC3	PLA2G4A	PTGS2	PLA2G5	MAPK13	PLA2G12B	MAP2K1	KDR	PLA2G4B	AKT1	PLA2G2F	AKT2	NRAS	AKT3	CHP2	NFAT5	MAPK3	RAC1	PLA2G1B	MAPK1	MAPKAPK3	PIK3R5	HRAS	NFATC4	MAPK14	MAPK12
KEGG_FOCAL_ADHESION	http://www.gsea-msigdb.org/gsea/msigdb/human/geneset/KEGG_FOCAL_ADHESION	JUN	ELK1	HGF	PARVA	FN1	TNN	IGF1	BIRC3	XIAP	COMP	THBS4	IGF1R	DIAPH1	ITGA11	PGF	PARVG	ROCK1	PTK2	MYL7	FLT1	FLT4	AKT1	RELN	AKT2	LAMC2	MYL12A	LAMB2	LAMB3	LAMC1	LAMA4	LAMA5	LAMB1	PAK6	PIK3R5	CAPN2	LAMB4	FLNC	FLNA	FLNB	MYL2	MYLK	MYL5	PIP5K1C	MET	MYL10	BIRC2	COL11A1	LAMC3
KEGG_ECM_RECEPTOR_INTERACTION	http://www.gsea-msigdb.org/gsea/msigdb/human/geneset/KEGG_ECM_RECEPTOR_INTERACTION	GP1BA	COL6A2	COL6A3	GP1BB	COL5A2	COL6A1	LAMA1	VWF	HSPG2	TNN	FN1	ITGA9	GP9	COMP	IBSP	CD36	CHAD	GP5	VTN	THBS4	ITGA4	ITGA3	ITGA2B	ITGA7	ITGA5	COL5A1	COL4A6	ITGA11	SV2C	COL2A1	COL3A1	COL4A1	AGRN	COL4A2	COL4A4	ITGB3	ITGB4	RELN	ITGB5	ITGB6	ITGB7	LAMC2	ITGAV	ITGB1	LAMB2	SPP1	LAMB3	LAMC1
KEGG_CELL_ADHESION_MOLECULES_CAMS	http://www.gsea-msigdb.org/gsea/msigdb/human/geneset/KEGG_CELL_ADHESION_MOLECULES_CAMS	CDH5	JAM3	CDH3	NLGN3	CDH4	CD80	NLGN1	CD86	CD28	CD274	PDCD1LG2	ITGA9	ITGAL	NRCAM	ITGAM	CD34	CD276	ICOSLG	CADM3	ITGA4	ICOS	SIGLEC1	CADM1	HLA-G	CLDN20	PECAM1	CD22	ITGB7	SELL	VCAM1	ITGAV	SELP	SPN	ITGB1	SELPLG	ITGB2	CDH2	JAM2	CTLA4	HLA-DRB4	CLDN18	CD4	HLA-DRB5	CNTN1	NLGN2	HLA-DRB3	NRXN3	ALCAM
KEGG_ADHERENS_JUNCTION	http://www.gsea-msigdb.org/gsea/msigdb/human/geneset/KEGG_ADHERENS_JUNCTION	AFDN	SORBS1	WAS	SNAI2	IGF1R	RHOA	CREBBP	LEF1	ACTN4	PTPN6	ACTN1	SNAI1	ERBB2	WASF2	RAC2	PTPRJ	WASL	RAC3	PTPRF	WASF1	MAP3K7	FGFR1	IQGAP1	SMAD3	MAPK3	TCF7	SMAD4	ACTG1	INSR	WASF3	CTNNA1	PTPRB	RAC1	TCF7L2	SMAD2	MAPK1	CSNK2A1	NECTIN3	CSNK2A2	EP300	EGFR	VCL	CTNNA2	CTNNB1	CTNND1	FARP2	CSNK2B	TGFBR2
KEGG_TIGHT_JUNCTION	http://www.gsea-msigdb.org/gsea/msigdb/human/geneset/KEGG_TIGHT_JUNCTION	PATJ	JAM3	AFDN	YBX3	PPP2R2D	MAGI2	PALS1	TJP3	MYH13	MAP3K20	EPB41L3	MYH14	RRAS2	MYH1	CTTN	MYH15	MYL7	CRB3	CLDN20	AKT1	AKT2	MYL12A	AKT3	NRAS	EXOC3	CTNNA1	JAM2	CSNK2A1	CLDN18	LLGL1	LLGL2	CSNK2A2	KRAS	CLDN17	PARD6B	MAGI1	GNAI1	GNAI2	MYL2	VAPA	MYL5	CSNK2B	SYMPK	MYL10	IGSF5	ASH1L	YES1	MAGI3
KEGG_GAP_JUNCTION	http://www.gsea-msigdb.org/gsea/msigdb/human/geneset/KEGG_GAP_JUNCTION	PLCB2	GRM5	SOS2	ADCY8	PLCB1	ADCY9	ADCY6	TUBA1A	RAF1	PRKCB	ADCY7	PRKCA	PLCB3	PLCB4	ADCY5	GRM1	CDK1	PDGFD	TUBB4A	ADRB1	TUBB4B	TUBB3	PRKCG	PDGFRB	TUBB2A	MAP2K2	ITPR3	MAP2K1	MAP2K5	LPAR1	ADCY4	TUBA1B	NRAS	GRB2	MAPK3	DRD1	GUCY1B1	DRD2	MAPK7	GUCY1A1	PRKG1	SOS1	TUBB7P	PRKG2	MAPK1	TUBA3D	HRAS	GJD2
KEGG_COMPLEMENT_AND_COAGULATION_CASCADES	http://www.gsea-msigdb.org/gsea/msigdb/human/geneset/KEGG_COMPLEMENT_AND_COAGULATION_CASCADES	F2	F2R	VWF	KNG1	FGB	PLAT	SERPIND1	MBL2	F3	F5	SERPINA1	PLAUR	F7	PLAU	F10	F9	TFPI	F8	KLKB1	CR2	MASP1	C9	A2M	CR1	F12	F13A1	F11	C8A	F13B	C7	C8G	C8B	CD59	SERPINA5	FGG	CD55	C6	C5AR1	C5	BDKRB1	C4BPB	C4BPA	C4B	C4A	BDKRB2	CFH	CFB	CPB2
KEGG_ANTIGEN_PROCESSING_AND_PRESENTATION	http://www.gsea-msigdb.org/gsea/msigdb/human/geneset/KEGG_ANTIGEN_PROCESSING_AND_PRESENTATION	HLA-DOA	HLA-DOB	KLRC3	KLRD1	KLRC1	KLRC2	RFXAP	RFX5	IFNA5	IFNA4	IFNA2	IFNA1	LGMN	PSME3	CTSS	HLA-C	HLA-B	HLA-DMB	HLA-DMA	HLA-A	HSPA1L	HSPA1B	HSPA2	KIR2DS5	HLA-G	KIR3DL1	KIR3DL2	HSPA1A	RFXANK	CREB1	IFNA17	HSPA5	CD74	HSPA4	IFNA21	CTSL	IFNA6	IFI30	IFNA7	IFNA8	IFNA10	IFNA13	CIITA	IFNA14	IFNA16	KIR2DL5A	HSPA6	HLA-DRB4
KEGG_TOLL_LIKE_RECEPTOR_SIGNALING_PATHWAY	http://www.gsea-msigdb.org/gsea/msigdb/human/geneset/KEGG_TOLL_LIKE_RECEPTOR_SIGNALING_PATHWAY	JUN	CD80	CD86	STAT1	TLR9	CCL3	MYD88	CCL5	MAP2K4	CCL4	LBP	RIPK1	TLR6	IKBKB	LY96	MAP3K8	MAP3K7	AKT1	AKT2	CD14	CTSK	AKT3	SPP1	IKBKE	NFKB1	NFKBIA	PIK3R5	TLR5	TIRAP	MAPK14	MAPK12	RELA	TRAF6	TRAF3	TOLLIP	CXCL11	TAB2	TLR7	TLR8	CXCL10	CASP8	TICAM1	CHUK	TNF	IFNA5	IFNA4	IFNA2	FADD
KEGG_NOD_LIKE_RECEPTOR_SIGNALING_PATHWAY	http://www.gsea-msigdb.org/gsea/msigdb/human/geneset/KEGG_NOD_LIKE_RECEPTOR_SIGNALING_PATHWAY	TRIP6	CASP8	CHUK	TAB3	CXCL1	RIPK2	TNF	BIRC3	CCL2	XIAP	CCL5	NOD1	CARD6	CCL13	CCL11	CCL8	CARD8	CCL7	MEFV	CXCL8	MAPK9	MAPK10	MAPK11	ERBIN	MAPK13	CASP5	IKBKB	NOD2	MAP3K7	CASP1	CARD18	TNFAIP3	SUGT1	MAPK3	PSTPIP1	NFKB1	NFKBIB	NFKBIA	MAPK1	IKBKG	CARD9	MAPK8	MAPK14	MAPK12	IL18	RELA	PYDC1	TRAF6
KEGG_RIG_I_LIKE_RECEPTOR_SIGNALING_PATHWAY	http://www.gsea-msigdb.org/gsea/msigdb/human/geneset/KEGG_RIG_I_LIKE_RECEPTOR_SIGNALING_PATHWAY	CASP10	CASP8	CXCL10	CHUK	TRIM25	TNF	IFNA5	IFNA4	IFNA2	ATG12	TBKBP1	FADD	SIKE1	IFNA1	RIPK1	CXCL8	MAPK9	IL12B	MAPK10	ISG15	MAPK11	MAP3K1	IL12A	MAPK13	IKBKB	MAP3K7	IFNA17	TKFC	IFNA21	IFNA6	IFNA7	IFNA8	IFNA10	OTUD5	IFNA13	IFNA14	IFNA16	DDX3X	IKBKE	NFKB1	NFKBIB	NFKBIA	IRF3	IFIH1	IKBKG	MAPK8	MAPK14	MAPK12
KEGG_CYTOSOLIC_DNA_SENSING_PATHWAY	http://www.gsea-msigdb.org/gsea/msigdb/human/geneset/KEGG_CYTOSOLIC_DNA_SENSING_PATHWAY	CXCL10	CHUK	IFNA5	IFNA4	IFNA2	POLR1D	CCL5	CCL4	IFNA1	RIPK1	POLR3K	AIM2	IKBKB	IFNA17	CASP1	IFNA21	IFNA6	POLR3H	IFNA7	IFNA8	IFNA10	IFNA13	IFNA14	IFNA16	POLR3C	IKBKE	POLR3G	POLR3B	POLR3F	NFKB1	NFKBIB	NFKBIA	IRF3	IKBKG	TREX1	POLR1C	IL18	RELA	ZBP1	POLR3D	RIPK3	IFNB1	IL33	PYCARD	POLR3GL	IL1B	ADAR	RIGI
KEGG_JAK_STAT_SIGNALING_PATHWAY	http://www.gsea-msigdb.org/gsea/msigdb/human/geneset/KEGG_JAK_STAT_SIGNALING_PATHWAY	STAT3	STAT4	STAT1	STAT2	PIAS3	TYK2	IL21R	CREBBP	SOCS5	IL23A	CTF1	STAM	SPRY4	IL22	JAK1	AKT1	AKT2	JAK3	JAK2	AKT3	STAT5B	STAT5A	TPO	STAT6	MYC	IL24	SPRED1	PIK3R5	CSF2	IL13RA2	PIAS1	IL13RA1	CNTF	PRLR	CNTFR	PRL	SOCS1	IFNE	CSF2RB	CSF2RA	IL23R	CSF3	SOCS3	CCND1	IL22RA2	CSH1	BCL2L1	CSF3R
KEGG_HEMATOPOIETIC_CELL_LINEAGE	http://www.gsea-msigdb.org/gsea/msigdb/human/geneset/KEGG_HEMATOPOIETIC_CELL_LINEAGE	GP1BA	GP1BB	EPO	IL9R	CD33	TNF	GP9	ITGAM	CD34	CD36	GP5	ITGA4	ITGA3	KITLG	ITGA2B	FCGR1A	ITGA5	FCER2	GYPA	THPO	IL1R2	IL7R	MME	IL11RA	CD19	MS4A1	TFRC	CD22	KIT	FLT3	ITGB3	FLT3LG	IL1A	CR2	CD14	CR1	TPO	EPOR	IL11	CSF2	HLA-DRB4	CD4	CSF1R	HLA-DRB5	CSF1	HLA-DRB3	IL3RA	IL3
KEGG_NATURAL_KILLER_CELL_MEDIATED_CYTOTOXICITY	http://www.gsea-msigdb.org/gsea/msigdb/human/geneset/KEGG_NATURAL_KILLER_CELL_MEDIATED_CYTOTOXICITY	ZAP70	TNFSF10	ITGAL	PPP3R2	PPP3CC	PPP3R1	FCER1G	SH2D1B	HLA-G	BRAF	VAV1	SHC4	PRF1	VAV2	NRAS	CHP2	ITGB2	GZMB	NFAT5	FCGR3B	RAET1E	ULBP3	FCGR3A	CSF2	PIK3R5	NCR1	HCST	NCR2	NFATC4	NFATC3	KRAS	SHC3	CD247	RAET1L	HLA-E	PAK1	LCP2	KLRK1	PLCG1	PLCG2	PTK2B	NFATC2	NFATC1	LCK	SOS2	PTPN11	KLRC3	RAF1
KEGG_T_CELL_RECEPTOR_SIGNALING_PATHWAY	http://www.gsea-msigdb.org/gsea/msigdb/human/geneset/KEGG_T_CELL_RECEPTOR_SIGNALING_PATHWAY	JUN	ZAP70	MALT1	CD28	PDPK1	PPP3R2	PPP3CC	PPP3R1	PAK4	ICOS	VAV1	IKBKB	MAP3K8	MAP3K7	AKT1	AKT2	NRAS	AKT3	VAV2	CHP2	NFAT5	NFKB1	NFKBIB	NFKBIA	PAK6	NFKBIE	NCK1	CTLA4	CSF2	PIK3R5	CD4	NFATC4	MAPK14	MAPK12	NFATC3	RELA	KRAS	CD8A	CD8B	CD247	NCK2	MAP3K14	PAK5	CD3D	CD3E	PAK1	CD3G	CBLC
KEGG_B_CELL_RECEPTOR_SIGNALING_PATHWAY	http://www.gsea-msigdb.org/gsea/msigdb/human/geneset/KEGG_B_CELL_RECEPTOR_SIGNALING_PATHWAY	JUN	SOS2	CHUK	RAF1	PRKCB	MALT1	CARD11	PPP3R2	PPP3CC	PPP3R1	PTPN6	INPP5D	DAPP1	RAC2	MAP2K2	RAC3	CD19	MAP2K1	VAV1	CD22	CD72	IKBKB	CD79A	AKT1	CD81	CR2	AKT2	CD79B	VAV2	AKT3	NRAS	CHP2	GRB2	RASGRP3	NFAT5	MAPK3	NFKB1	NFKBIB	RAC1	NFKBIA	SOS1	FCGR2B	NFKBIE	MAPK1	PIK3R5	IKBKG	HRAS	IFITM1
KEGG_FC_EPSILON_RI_SIGNALING_PATHWAY	http://www.gsea-msigdb.org/gsea/msigdb/human/geneset/KEGG_FC_EPSILON_RI_SIGNALING_PATHWAY	SOS2	RAF1	PRKCB	PRKCA	PDPK1	TNF	MAP2K4	PLA2G3	FCER1G	MS4A2	FCER1A	PRKCD	INPP5D	PRKCE	JMJD7-PLA2G4B	MAPK9	MAPK10	PLA2G6	RAC2	IL13	PLA2G2E	PLA2G10	MAPK11	MAP2K2	PLA2G2A	RAC3	MAP2K3	PLA2G4A	MAPK13	PLA2G5	PLA2G12B	MAP2K1	VAV1	MAP2K7	PLA2G4B	MAP2K6	AKT1	PLA2G2F	AKT2	VAV2	AKT3	NRAS	GRB2	MAPK3	RAC1	SOS1	PLA2G1B	MAPK1
KEGG_FC_GAMMA_R_MEDIATED_PHAGOCYTOSIS	http://www.gsea-msigdb.org/gsea/msigdb/human/geneset/KEGG_FC_GAMMA_R_MEDIATED_PHAGOCYTOSIS	FCGR1A	SPHK1	PIP4K2B	WASF2	PLA2G6	VAV1	WASF1	PLA2G4B	PIKFYVE	VASP	AKT1	AKT2	PIP5K1A	AMPH	DOCK2	PIP5K1B	ARPC4	ARPC5	AKT3	VAV2	ARPC1B	ARPC3	SCIN	WASF3	FCGR2A	FCGR3A	FCGR2B	PIK3R5	DNM2	CFL2	CFL1	PIP5K1C	PLA2G4E	ASAP2	DNM3	PAK1	CRK	CRKL	PLCG1	PLCG2	PLD1	ARPC5L	PLD2	CDC42	PRKCB	RAF1	PRKCA	ARF6
KEGG_LEUKOCYTE_TRANSENDOTHELIAL_MIGRATION	http://www.gsea-msigdb.org/gsea/msigdb/human/geneset/KEGG_LEUKOCYTE_TRANSENDOTHELIAL_MIGRATION	CDH5	JAM3	AFDN	TXK	ITGAL	ITGAM	ITGA4	SIPA1	ROCK1	MMP2	PTK2	MYL7	NCF4	MMP9	NCF2	CLDN20	PECAM1	VAV1	VASP	VCAM1	ITGB1	MYL12A	THY1	VAV2	ITGB2	CTNNA1	JAM2	PIK3R5	CLDN18	MAPK14	MAPK12	VCL	CLDN17	GNAI1	MYL2	GNAI2	CTNND1	MYL5	PXN	RAPGEF3	MYL10	ARHGAP5	BCAR1	GNAI3	CLDN16	CLDN23	EZR	CXCL12
KEGG_INTESTINAL_IMMUNE_NETWORK_FOR_IGA_PRODUCTION	http://www.gsea-msigdb.org/gsea/msigdb/human/geneset/KEGG_INTESTINAL_IMMUNE_NETWORK_FOR_IGA_PRODUCTION	HLA-DRB4	TNFRSF13C	HLA-DRB5	HLA-DOA	HLA-DOB	HLA-DRB3	CD80	CD86	CD28	TNFSF13	TNFSF13B	CCL27	IL15RA	IL15	ICOSLG	ITGA4	TGFB1	ICOS	CCR9	MAP3K14	CXCR4	CCL25	TNFRSF17	HLA-DMB	HLA-DMA	CCL28	LTBR	PIGR	IL2	CD40LG	HLA-DPA1	CD40	AICDA	HLA-DPB1	HLA-DQA1	HLA-DQA2	HLA-DQB1	TNFRSF13B	ITGB7	CXCL12	CCR10	MADCAM1	IL4	IL5	IL10	IL6	HLA-DRB1	HLA-DRA
KEGG_LONG_TERM_POTENTIATION	http://www.gsea-msigdb.org/gsea/msigdb/human/geneset/KEGG_LONG_TERM_POTENTIATION	GRM5	PLCB2	ADCY8	CALM2	PLCB1	RAF1	PRKCB	PLCB3	PRKCA	CALM1	PLCB4	RPS6KA6	PPP3R2	GRM1	PPP3CC	PPP3R1	CREBBP	PPP1R12A	PRKCG	GRIN1	GRIN2A	GRIN2B	MAP2K2	GRIN2C	BRAF	GRIN2D	ITPR3	CACNA1C	MAP2K1	GRIA2	GRIA1	RPS6KA2	RPS6KA3	NRAS	CHP2	PPP1R1A	PPP1CC	PPP1CA	PPP1CB	MAPK3	RPS6KA1	MAPK1	HRAS	ITPR1	EP300	ITPR2	KRAS	PRKX
KEGG_NEUROTROPHIN_SIGNALING_PATHWAY	http://www.gsea-msigdb.org/gsea/msigdb/human/geneset/KEGG_NEUROTROPHIN_SIGNALING_PATHWAY	JUN	FRS2	CALM2	CALM1	PDPK1	RPS6KA6	TP73	MAP3K5	RPS6KA5	BRAF	MAP3K1	MAP3K3	IKBKB	ABL1	AKT1	SHC4	AKT2	NRAS	AKT3	SH2B1	NFKB1	NFKBIB	NFKBIA	NFKBIE	PIK3R5	MAPK14	BEX3	MAPK12	RELA	KRAS	SHC3	TRAF6	NGF	CALML5	BDNF	NGFR	SH2B3	CSK	CAMK4	YWHAB	BCL2	CAMK2A	CAMK2B	CAMK2D	FOXO3	CAMK2G	IRS2	SORT1
KEGG_LONG_TERM_DEPRESSION	http://www.gsea-msigdb.org/gsea/msigdb/human/geneset/KEGG_LONG_TERM_DEPRESSION	GRM5	PLCB2	RYR1	PLCB1	RAF1	PRKCB	PRKCA	PLCB3	PLCB4	IGF1	CRHR1	GRM1	CRH	IGF1R	PLA2G3	GRID2	PRKCG	JMJD7-PLA2G4B	CACNA1A	PLA2G6	PLA2G2E	PLA2G10	MAP2K2	PLA2G2A	BRAF	PLA2G4A	ITPR3	PLA2G5	PLA2G12B	MAP2K1	NOS1	GRIA3	GRIA2	GRIA1	PLA2G4B	PLA2G2F	NRAS	MAPK3	GUCY1B1	GUCY1A1	PRKG1	PRKG2	MAPK1	PLA2G1B	HRAS	ITPR1	ITPR2	GNA12
KEGG_OLFACTORY_TRANSDUCTION	http://www.gsea-msigdb.org/gsea/msigdb/human/geneset/KEGG_OLFACTORY_TRANSDUCTION	CALM2	CALM1	OR11H4	OR52W1	OR5AU1	GRK3	OR2M2	OR2M7	OR2T33	OR4F5	CLCA4	OR52K1	OR52I1	OR51D1	OR2J2	OR8I2	OR2D2	OR2D3	OR4K13	OR4K2	OR2AK2	OR4N5	OR2L3	OR4K17	OR2L8	ARRB2	OR11G2	OR11L1	OR5P2	OR5P3	OR6C1	OR6C75	OR10AG1	OR6C76	OR6C70	OR5J2	OR52A1	OR4M2	OR51S1	OR4N2	GUCA1B	OR52R1	GUCA1A	OR51F2	OR13H1	OR9K2	CAMK2A	CAMK2B
KEGG_REGULATION_OF_ACTIN_CYTOSKELETON	http://www.gsea-msigdb.org/gsea/msigdb/human/geneset/KEGG_REGULATION_OF_ACTIN_CYTOSKELETON	BRK1	FN1	ENAH	DIAPH1	SSH2	RRAS2	ITGA11	ROCK1	PTK2	MYL7	ARHGEF7	ARPC4	CD14	FGD3	ARPC5	MYL12A	NRAS	ARPC1B	ARPC3	TIAM1	SCIN	PAK6	PFN1	PFN2	PIK3R5	IQGAP3	KRAS	CFL2	CFL1	MYL2	MYLK	BDKRB1	MYL5	PIP5K1C	BDKRB2	CSK	MYL10	APC	PIP4K2C	MYH9	ARPC5L	MYH10	ARHGEF4	FGF9	FGF8	FGF7	FGF6	FGF5
KEGG_INSULIN_SIGNALING_PATHWAY	http://www.gsea-msigdb.org/gsea/msigdb/human/geneset/KEGG_INSULIN_SIGNALING_PATHWAY	GCK	CALM2	PPARGC1A	ELK1	CALM1	EIF4E	EIF4EBP1	PRKAG2	FBP1	HK2	HK1	RHEB	BRAF	PDPK1	IKBKB	EXOC7	AKT1	SHC4	AKT2	NRAS	AKT3	PYGB	PYGM	ACACB	INPP5K	PYGL	ACACA	PIK3R5	PDE3B	PHKB	PHKA2	PHKA1	FLOT2	KRAS	SHC3	SOCS1	PRKX	PRKAB2	CALML5	PRKAB1	PRKAA2	PRKAA1	PDE3A	SOCS3	FOXO1	PRKACA	PRKACB	G6PC2
KEGG_GNRH_SIGNALING_PATHWAY	http://www.gsea-msigdb.org/gsea/msigdb/human/geneset/KEGG_GNRH_SIGNALING_PATHWAY	JUN	CALM2	ELK1	CALM1	MAP2K4	JMJD7-PLA2G4B	MMP2	PLA2G2E	PLA2G6	PLA2G10	MAP3K1	MAP3K3	ITPR3	MAP3K4	PLA2G4B	CGA	PLA2G2F	NRAS	MAPK14	MAPK12	KRAS	GNA11	PRKX	CALML5	ADCY3	ADCY2	ADCY1	PLA2G4E	CAMK2A	CAMK2B	CAMK2D	CAMK2G	PRKACA	GNAQ	PRKACB	PRKACG	GNRHR	GNAS	GNRH2	GNRH1	CALML3	PLA2G2D	PLD1	PLA2G12A	PLD2	HBEGF	CALM3	PTK2B
KEGG_PROGESTERONE_MEDIATED_OOCYTE_MATURATION	http://www.gsea-msigdb.org/gsea/msigdb/human/geneset/KEGG_PROGESTERONE_MEDIATED_OOCYTE_MATURATION	CDC16	ADCY8	ADCY9	ADCY6	RAF1	ADCY7	ADCY5	SPDYA	IGF1	RPS6KA6	CDK1	ANAPC10	IGF1R	ANAPC1	INS	ANAPC11	SPDYC	MAPK9	MAPK10	MAPK11	BRAF	MAPK13	MAP2K1	ADCY4	AKT1	AKT2	RPS6KA2	RPS6KA3	AKT3	CPEB1	MAPK3	ANAPC7	ANAPC5	ANAPC2	ANAPC4	MAD2L1	RPS6KA1	MAPK1	PIK3R5	PDE3B	MAPK8	CDC23	MAPK14	MAPK12	KRAS	PRKX	GNAI1	CCNA1
KEGG_MELANOGENESIS	http://www.gsea-msigdb.org/gsea/msigdb/human/geneset/KEGG_MELANOGENESIS	CALM2	CALM1	TYR	CREB3L1	FZD1	FZD4	FZD6	FZD7	LEF1	CREBBP	CREB3	FZD8	FZD9	POMC	WNT9B	WNT9A	CREB1	WNT2B	WNT11	EDN1	WNT10B	NRAS	EDNRB	KRAS	PRKX	GNAI1	GNAI2	CALML5	ADCY3	ADCY2	ADCY1	CREB3L3	WNT5B	CAMK2A	CAMK2B	CAMK2D	CAMK2G	PRKACA	GNAQ	PRKACB	PRKACG	GNAS	GNAI3	WNT16	GNAO1	CALML3	DCT	CALM3
KEGG_ADIPOCYTOKINE_SIGNALING_PATHWAY	http://www.gsea-msigdb.org/gsea/msigdb/human/geneset/KEGG_ADIPOCYTOKINE_SIGNALING_PATHWAY	STAT3	CHUK	PTPN11	PPARGC1A	NPY	TNF	SLC2A4	CD36	SLC2A1	MTOR	ADIPOR2	PRKAG2	ACSL6	POMC	MAPK9	MAPK10	PRKCQ	RXRB	RXRG	IKBKB	PRKAG3	RXRA	TNFRSF1B	ADIPOR1	AKT1	AKT2	TNFRSF1A	JAK2	LEPR	AKT3	CPT1B	LEP	ACACB	NFKB1	NFKBIB	NFKBIA	NFKBIE	IKBKG	MAPK8	CPT1A	PCK2	CPT1C	PCK1	RELA	STK11	PPARA	TRAF2	PRKAB2
KEGG_TYPE_II_DIABETES_MELLITUS	http://www.gsea-msigdb.org/gsea/msigdb/human/geneset/KEGG_TYPE_II_DIABETES_MELLITUS	PIK3R5	GCK	MAPK8	TNF	MAFA	SOCS1	SLC2A4	SLC2A2	MTOR	SOCS2	SOCS3	INS	PRKCD	PRKCE	MAPK9	HK2	CACNA1A	MAPK10	HK3	HK1	PIK3R3	CACNA1D	CACNA1E	CACNA1B	PDX1	CACNA1C	ADIPOQ	IKBKB	IRS2	ABCC8	SOCS4	PIK3CA	CACNA1G	PIK3CB	PIK3CD	PRKCZ	KCNJ11	MAPK3	IRS1	PKLR	INSR	PKM	PIK3CG	IRS4	PIK3R1	PIK3R2	MAPK1
KEGG_TYPE_I_DIABETES_MELLITUS	http://www.gsea-msigdb.org/gsea/msigdb/human/geneset/KEGG_TYPE_I_DIABETES_MELLITUS	HLA-DRB4	HLA-DRB5	LTA	HLA-DOA	HLA-DOB	HLA-DRB3	CD80	CD86	CD28	TNF	ICA1	IFNG	PTPRN2	HLA-C	HLA-B	INS	IL1B	HLA-DMB	PTPRN	HLA-DMA	HLA-F	HLA-E	HLA-A	IL2	HLA-DPA1	IL12B	HLA-DPB1	GAD1	HLA-DQA1	HLA-G	HLA-DQA2	IL12A	CPE	HLA-DQB1	GAD2	IL1A	HSPD1	PRF1	FAS	FASLG	GZMB	HLA-DRB1	HLA-DRA
KEGG_MATURITY_ONSET_DIABETES_OF_THE_YOUNG	http://www.gsea-msigdb.org/gsea/msigdb/human/geneset/KEGG_MATURITY_ONSET_DIABETES_OF_THE_YOUNG	MNX1	NEUROG3	GCK	HHEX	HES1	MAFA	PAX6	SLC2A2	BHLHA15	HNF1B	HNF4G	NKX6-1	HNF1A	FOXA3	HNF4A	NKX2-2	ONECUT1	NEUROD1	INS	FOXA2	PAX4	PDX1	IAPP	NR5A2	PKLR
KEGG_ALDOSTERONE_REGULATED_SODIUM_REABSORPTION	http://www.gsea-msigdb.org/gsea/msigdb/human/geneset/KEGG_ALDOSTERONE_REGULATED_SODIUM_REABSORPTION	PIK3R5	SFN	NR3C2	PRKCB	PRKCA	FXYD4	KRAS	FXYD2	IGF1	SCNN1G	SCNN1B	SCNN1A	ATP1B2	KCNJ1	ATP1B3	ATP1A4	ATP1B1	NEDD4L	INS	PRKCG	PIK3R3	HSD11B2	HSD11B1	SLC9A3R2	PDPK1	ATP1A1	IRS2	ATP1A3	ATP1A2	PIK3CA	PIK3CB	PIK3CD	MAPK3	IRS1	SGK1	ATP1B4	INSR	PIK3CG	IRS4	PIK3R1	PIK3R2	MAPK1
KEGG_VASOPRESSIN_REGULATED_WATER_REABSORPTION	http://www.gsea-msigdb.org/gsea/msigdb/human/geneset/KEGG_VASOPRESSIN_REGULATED_WATER_REABSORPTION	ADCY9	ADCY6	DYNLL2	DYNC1LI2	VAMP2	DCTN6	CREB3L4	AQP4	PRKX	RAB11A	DYNLL1	DCTN2	AQP3	CREB3L1	ADCY3	CREB3	RAB5B	AVPR2	RAB5A	CREB3L3	NSF	DCTN5	AVP	CREB3L2	RAB11B	STX4	PRKACA	PRKACB	PRKACG	CREB1	GNAS	DYNC2H1	DYNC1H1	DCTN4	DYNC1I2	DCTN1	DYNC1I1	CREB5	AQP2	DYNC2LI1	ARHGDIA	ARHGDIB	DYNC1LI1	RAB5C
KEGG_ALZHEIMERS_DISEASE	http://www.gsea-msigdb.org/gsea/msigdb/human/geneset/KEGG_ALZHEIMERS_DISEASE	UQCR10	NAE1	CALM2	NDUFA5	NDUFA4	COX6CP3	CALM1	ATP2A1	PPP3R2	EIF2AK3	PPP3CC	ATP2A3	PPP3R1	ATP2A2	NDUFS7	MT-CYB	ADAM17	BACE2	ATP5PO	MT-CO2	MT-CO1	COX8C	MME	MT-CO3	COX5B	ITPR3	PSENEN	LRP1	COX4I1	APOE	MT-ATP6	MT-ATP8	CHP2	ATP5PD	NDUFA2	NDUFA3	NDUFA1	CAPN2	LPL	CAPN1	APAF1	ATP5MC1P5	HSD17B10	APH1A	UQCRQ	ATP5F1D	CALML5	GAPDH
KEGG_PARKINSONS_DISEASE	http://www.gsea-msigdb.org/gsea/msigdb/human/geneset/KEGG_PARKINSONS_DISEASE	UQCR10	NDUFA5	NDUFA4	COX6CP3	UBE2L6	NDUFS7	MT-CYB	MT-CO2	ATP5PO	MT-CO1	COX8C	MT-CO3	VDAC2P5	COX5B	COX4I1	MT-ATP6	UCHL1	MT-ATP8	ATP5PD	NDUFA2	NDUFA3	NDUFA1	SNCAIP	APAF1	SEPTIN5	UBE2G2	UBE2G1	ATP5MC1P5	VDAC1	VDAC2	VDAC3	UBE2J2	UQCRQ	ATP5F1D	UBE2L3	COX7A2L	ATP5MC3	ATP5MC2	ATP5MC1	ATP5PB	ATP5F1E	COX5A	UBA7	UBA1	SLC25A6	UQCRHL	SLC25A5	ATP5F1A
KEGG_AMYOTROPHIC_LATERAL_SCLEROSIS_ALS	http://www.gsea-msigdb.org/gsea/msigdb/human/geneset/KEGG_AMYOTROPHIC_LATERAL_SCLEROSIS_ALS	CASP9	TNF	CAT	PPP3R2	PPP3CC	PPP3R1	ALS2	BAD	CCS	MAP3K5	TOMM40L	GRIN1	GRIN2A	MAPK11	GRIN2B	SOD1	GRIN2C	BID	GRIN2D	MAP2K3	MAPK13	NOS1	BAX	NEFM	GRIA2	SLC1A2	NEFH	GRIA1	MAP2K6	TNFRSF1B	CASP1	CASP3	NEFL	TNFRSF1A	DAXX	CHP2	RAC1	MAPK14	MAPK12	APAF1	GPX1	RAB5A	BCL2	BCL2L1	PRPH2	PPP3CB	TP53	PPP3CA
KEGG_HUNTINGTONS_DISEASE	http://www.gsea-msigdb.org/gsea/msigdb/human/geneset/KEGG_HUNTINGTONS_DISEASE	POLR2G	POLR2H	POLR2E	UQCR10	POLR2F	NDUFA5	PPARGC1A	NDUFA4	POLR2I	COX6CP3	POLR2J	TAF4	NRF1	DCTN2	CREB3L1	NDUFS7	MT-CYB	CREBBP	CREB3	POLR2K	ATP5PO	MT-CO2	MT-CO1	UCP1	CLTCL1	COX8C	DNALI1	POLR2L	MT-CO3	VDAC2P5	COX5B	COX4I1	CREB1	HIP1	AP2A2	MT-ATP6	AP2B1	DCTN4	MT-ATP8	TAF4B	ATP5PD	AP2A1	NDUFA2	NDUFA3	NDUFA1	DNAI1	APAF1	ATP5MC1P5
KEGG_PRION_DISEASES	http://www.gsea-msigdb.org/gsea/msigdb/human/geneset/KEGG_PRION_DISEASES	NCAM2	EGR1	NCAM1	ELK1	NOTCH1	PRKX	C6	CCL5	C5	IL1B	SOD1	STIP1	MAP2K2	HSPA1A	MAP2K1	BAX	PRKACA	PRKACB	PRKACG	IL1A	HSPA5	PRNP	C9	C1QB	C1QA	LAMC1	C1QC	MAPK3	FYN	C8A	C7	IL6	C8G	C8B	MAPK1
KEGG_VIBRIO_CHOLERAE_INFECTION	http://www.gsea-msigdb.org/gsea/msigdb/human/geneset/KEGG_VIBRIO_CHOLERAE_INFECTION	ATP6V1G1	PDIA4	ADCY9	PRKCB	SLC12A2	SEC61B	PRKCA	TJP2	KDELR3	ATP6V0A1	ATP6V1G2	KDELR2	ATP6V0B	ATP6V1G3	ATP6AP1	PRKCG	CFTR	ATP6V1F	ERO1A	ATP6V0A4	ATP6V0A2	ATP6V0D1	KCNQ1	ARF1	ACTG1	ATP6V0E2	SEC61G	ATP6V1H	PRKX	ATP6V1E2	MUC2	KDELR1	ADCY3	ATP6V0D2	ATP6V0E1	ATP6V1C2	ACTB	TJP1	TCIRG1	PRKACA	PRKACB	PRKACG	GNAS	ATP6V1D	SEC61A2	ATP6V1A	PLCG1	PLCG2
KEGG_EPITHELIAL_CELL_SIGNALING_IN_HELICOBACTER_PYLORI_INFECTION	http://www.gsea-msigdb.org/gsea/msigdb/human/geneset/KEGG_EPITHELIAL_CELL_SIGNALING_IN_HELICOBACTER_PYLORI_INFECTION	JUN	JAM3	ATP6V1G1	CHUK	PTPN11	CXCL1	MAP2K4	CCL5	NOD1	ADAM17	ATP6V0A1	ATP6V1G2	ATP6V0B	ATP6V1G3	CXCR2	ATP6AP1	CXCR1	CXCL8	F11R	MAPK9	MAPK10	MAPK11	MAPK13	IKBKB	ATP6V1F	ATP6V0A4	CASP3	ATP6V0A2	ATP6V0D1	NFKB1	RAC1	NFKBIA	JAM2	IKBKG	MAPK8	MAPK14	MAPK12	EGFR	RELA	ATP6V0E2	ATP6V1H	ATP6V1E2	PTPRZ1	ATP6V0D2	MAP3K14	ATP6V0E1	ATP6V1C2	ADAM10
KEGG_LEISHMANIA_INFECTION	http://www.gsea-msigdb.org/gsea/msigdb/human/geneset/KEGG_LEISHMANIA_INFECTION	JUN	HLA-DOA	HLA-DOB	PRKCB	STAT1	ELK1	TNF	ITGAM	ITGA4	MYD88	FCGR2C	FCGR1A	HLA-DMB	HLA-DMA	PTPN6	IRAK4	IL12B	MAPK11	NCF4	NCF2	PTGS2	MAPK13	IL12A	NOS2	MAP3K7	IL1A	JAK1	JAK2	ITGB1	ITGB2	CR1	MAPK3	FCGR3B	NFKB1	FCGR2A	IL10	NFKBIB	NFKBIA	FCGR3A	MARCKSL1	MAPK1	HLA-DRB4	HLA-DRB5	HLA-DRB3	MAPK14	MAPK12	RELA	IFNGR2
KEGG_PATHWAYS_IN_CANCER	http://www.gsea-msigdb.org/gsea/msigdb/human/geneset/KEGG_PATHWAYS_IN_CANCER	JUN	STAT3	TFG	STAT1	HGF	BIRC5	FN1	BIRC3	IGF1	XIAP	PML	JUP	HHIP	IGF1R	FZD1	FZD4	GSTP1	FZD6	FZD7	FZD8	LEF1	FZD9	MSH6	PGF	CTBP2	CTBP1	WNT9B	PTK2	WNT9A	PTGS2	HIF1A	FLT3	FLT3LG	ABL1	WNT2B	JAK1	WNT11	AKT1	WNT10B	AKT2	LAMC2	SMO	NRAS	LAMB2	ARNT	TPR	LAMB3	AXIN1
KEGG_COLORECTAL_CANCER	http://www.gsea-msigdb.org/gsea/msigdb/human/geneset/KEGG_COLORECTAL_CANCER	JUN	CASP9	RAF1	BIRC5	APC2	RHOA	LEF1	MSH6	BAD	MAPK9	MAPK10	RAC2	RAC3	BRAF	MLH1	MAP2K1	BAX	AKT1	CASP3	AKT2	AKT3	AXIN1	AXIN2	SMAD3	MAPK3	SMAD4	TCF7	RAC1	MYC	TCF7L2	SMAD2	MAPK1	PIK3R5	MAPK8	APPL1	GSK3B	KRAS	CTNNB1	TGFB2	TGFB1	ARAF	TGFBR2	TGFBR1	TGFB3	CCND1	PIK3R3	BCL2	TCF7L1
KEGG_RENAL_CELL_CARCINOMA	http://www.gsea-msigdb.org/gsea/msigdb/human/geneset/KEGG_RENAL_CELL_CARCINOMA	JUN	SOS2	PAK3	PTPN11	RAF1	HGF	PAK2	SLC2A1	PAK4	CREBBP	ELOC	ELOB	PGF	MAP2K2	TGFA	BRAF	FLCN	MAP2K1	HIF1A	AKT1	ARNT2	AKT2	RAPGEF1	AKT3	NRAS	ARNT	CUL2	GRB2	MAPK3	ETS1	EGLN2	EGLN3	PAK6	RAC1	SOS1	MAPK1	PIK3R5	HRAS	EP300	EPAS1	KRAS	TGFB2	TGFB1	FH	VEGFA	ARAF	VEGFC	VEGFB
KEGG_PANCREATIC_CANCER	http://www.gsea-msigdb.org/gsea/msigdb/human/geneset/KEGG_PANCREATIC_CANCER	CASP9	E2F1	STAT3	CHUK	RAF1	ARHGEF6	STAT1	RAD51	BAD	PGF	MAPK9	MAPK10	ERBB2	RAC2	BRCA2	TGFA	BRAF	RAC3	MAP2K1	IKBKB	RB1	JAK1	AKT1	AKT2	AKT3	SMAD3	MAPK3	SMAD4	NFKB1	RAC1	SMAD2	MAPK1	PIK3R5	IKBKG	MAPK8	EGFR	RELA	KRAS	CDKN2A	EGF	TGFB2	TGFB1	VEGFA	ARAF	VEGFC	VEGFB	TGFBR2	TGFBR1
KEGG_ENDOMETRIAL_CANCER	http://www.gsea-msigdb.org/gsea/msigdb/human/geneset/KEGG_ENDOMETRIAL_CANCER	CASP9	SOS2	RAF1	ELK1	APC2	LEF1	BAD	ERBB2	MAP2K2	BRAF	MLH1	MAP2K1	PDPK1	ILK	AKT1	AKT2	NRAS	AKT3	GRB2	AXIN1	AXIN2	MAPK3	TCF7	CTNNA1	MYC	SOS1	MAPK1	TCF7L2	PIK3R5	HRAS	EGFR	GSK3B	KRAS	CTNNA2	EGF	CTNNB1	ARAF	CCND1	PTEN	PIK3R3	TCF7L1	FOXO3	APC	TP53	PIK3CA	PIK3CB	PIK3CD	CTNNA3
KEGG_GLIOMA	http://www.gsea-msigdb.org/gsea/msigdb/human/geneset/KEGG_GLIOMA	SOS2	CALM2	E2F1	PRKCB	RAF1	SHC1	PRKCA	CALM1	IGF1	MTOR	IGF1R	PRKCG	PDGFRB	MAP2K2	TGFA	BRAF	MAP2K1	MDM2	RB1	AKT1	SHC4	AKT2	NRAS	AKT3	GRB2	MAPK3	SOS1	MAPK1	PIK3R5	HRAS	EGFR	KRAS	CDKN2A	SHC3	CDKN1A	EGF	ARAF	CALML5	CCND1	PTEN	PIK3R3	PDGFA	CAMK2A	PDGFB	CAMK2B	PDGFRA	CAMK2D	CAMK2G
KEGG_PROSTATE_CANCER	http://www.gsea-msigdb.org/gsea/msigdb/human/geneset/KEGG_PROSTATE_CANCER	CASP9	SOS2	E2F1	CHUK	RAF1	IGF1	CREB3L4	MTOR	CREB3L1	PDGFD	NKX3-1	IGF1R	GSTP1	CREB3	CREBBP	LEF1	BAD	INS	PDGFRB	ERBB2	MAP2K2	TGFA	BRAF	MAP2K1	FGFR2	PDPK1	IKBKB	MDM2	RB1	CREB1	AKT1	AKT2	FGFR1	AKT3	NRAS	GRB2	CREB5	MAPK3	TCF7	NFKB1	INSRR	NFKBIA	SOS1	TCF7L2	MAPK1	PIK3R5	IKBKG	HRAS
KEGG_THYROID_CANCER	http://www.gsea-msigdb.org/gsea/msigdb/human/geneset/KEGG_THYROID_CANCER	PAX8	HRAS	CCDC6	TFG	NCOA4	KRAS	CTNNB1	LEF1	CCND1	MAP2K2	TCF7L1	BRAF	MAP2K1	RXRB	RXRG	RXRA	PPARG	TP53	RET	NRAS	TPR	MAPK3	TCF7	NTRK1	MYC	TPM3	CDH1	MAPK1	TCF7L2
KEGG_BASAL_CELL_CARCINOMA	http://www.gsea-msigdb.org/gsea/msigdb/human/geneset/KEGG_BASAL_CELL_CARCINOMA	HHIP	FZD1	APC2	FZD4	FZD6	PTCH2	FZD7	FZD8	LEF1	FZD9	WNT3A	DVL3	WNT9B	DVL2	WNT9A	FZD3	DVL1	WNT2B	WNT11	WNT10B	SMO	AXIN1	WNT4	WNT10A	AXIN2	TCF7	TCF7L2	SHH	WNT1	GSK3B	WNT7A	WNT7B	WNT8A	WNT8B	WNT2	WNT3	WNT5A	CTNNB1	WNT6	STK36	FZD10	WNT5B	FZD5	GLI1	TCF7L1	BMP4	SUFU	APC
KEGG_MELANOMA	http://www.gsea-msigdb.org/gsea/msigdb/human/geneset/KEGG_MELANOMA	E2F1	RAF1	FGF9	HGF	FGF8	FGF7	IGF1	FGF6	FGF5	PDGFD	IGF1R	FGF3	FGF4	FGF1	FGF2	FGF21	BAD	PDGFRB	MAP2K2	BRAF	MAP2K1	MDM2	RB1	AKT1	AKT2	FGFR1	FGF14	FGF17	FGF16	AKT3	NRAS	FGF10	FGF11	FGF12	FGF13	MAPK3	FGF19	MAPK1	PIK3R5	FGF20	HRAS	EGFR	PDGFC	CDKN2A	KRAS	CDKN1A	EGF	FGF23
KEGG_BLADDER_CANCER	http://www.gsea-msigdb.org/gsea/msigdb/human/geneset/KEGG_BLADDER_CANCER	HRAS	E2F1	RAF1	EGFR	CDKN2A	KRAS	EGF	CDKN1A	TYMP	VEGFA	ARAF	VEGFC	VEGFB	PGF	CXCL8	CCND1	ERBB2	MMP2	MMP1	MAP2K2	RPS6KA5	BRAF	MMP9	MAP2K1	CDK4	MDM2	RB1	VEGFD	RASSF1	TP53	E2F3	FGFR3	E2F2	NRAS	MAPK3	DAPK3	DAPK2	DAPK1	THBS1	MYC	CDH1	MAPK1
KEGG_CHRONIC_MYELOID_LEUKEMIA	http://www.gsea-msigdb.org/gsea/msigdb/human/geneset/KEGG_CHRONIC_MYELOID_LEUKEMIA	SOS2	E2F1	CHUK	PTPN11	RAF1	SHC1	BAD	CTBP2	CTBP1	MAP2K2	BRAF	MECOM	MAP2K1	IKBKB	MDM2	RB1	ABL1	AKT1	AKT2	SHC4	AKT3	NRAS	GRB2	STAT5B	SMAD3	MAPK3	STAT5A	SMAD4	NFKB1	NFKBIA	SOS1	MYC	MAPK1	RUNX1	PIK3R5	IKBKG	HRAS	RELA	GAB2	CBLB	CDKN2A	KRAS	CBL	SHC3	CDKN1B	CDKN1A	TGFB2	TGFB1
KEGG_ACUTE_MYELOID_LEUKEMIA	http://www.gsea-msigdb.org/gsea/msigdb/human/geneset/KEGG_ACUTE_MYELOID_LEUKEMIA	SOS2	CHUK	STAT3	ZBTB16	RAF1	RARA	PML	JUP	MTOR	CEBPA	LEF1	EIF4EBP1	BAD	PIM2	MAP2K2	BRAF	MAP2K1	KIT	FLT3	SPI1	IKBKB	AKT1	AKT2	RPS6KB1	NRAS	AKT3	RPS6KB2	GRB2	STAT5B	MAPK3	TCF7	STAT5A	NFKB1	MYC	SOS1	TCF7L2	MAPK1	RUNX1	PIK3R5	IKBKG	HRAS	RUNX1T1	RELA	KRAS	CCNA1	ARAF	CCND1	PIK3R3
KEGG_SMALL_CELL_LUNG_CANCER	http://www.gsea-msigdb.org/gsea/msigdb/human/geneset/KEGG_SMALL_CELL_LUNG_CANCER	CASP9	MAX	E2F1	CHUK	LAMA1	RARB	PIAS3	FN1	BIRC3	XIAP	ITGA3	ITGA2B	COL4A6	PTK2	COL4A1	COL4A2	PTGS2	NOS2	COL4A4	RXRB	RXRG	IKBKB	RXRA	RB1	SKP2	AKT1	AKT2	PIAS2	ITGAV	LAMC2	ITGB1	AKT3	LAMB2	LAMB3	LAMC1	LAMA4	LAMA5	LAMB1	NFKB1	NFKBIA	MYC	PIK3R5	PIAS1	IKBKG	LAMB4	RELA	APAF1	CDKN1B
KEGG_NON_SMALL_CELL_LUNG_CANCER	http://www.gsea-msigdb.org/gsea/msigdb/human/geneset/KEGG_NON_SMALL_CELL_LUNG_CANCER	CASP9	SOS2	E2F1	PRKCB	RAF1	PRKCA	RARB	BAD	PRKCG	ERBB2	MAP2K2	TGFA	BRAF	MAP2K1	RXRB	PDPK1	RXRG	RB1	RXRA	RASSF1	AKT1	AKT2	NRAS	AKT3	GRB2	MAPK3	SOS1	MAPK1	PIK3R5	HRAS	EGFR	KRAS	CDKN2A	EGF	RASSF5	FHIT	STK4	ARAF	CCND1	PIK3R3	FOXO3	CDK4	TP53	E2F3	E2F2	PIK3CA	PIK3CB	CDK6
KEGG_ASTHMA	http://www.gsea-msigdb.org/gsea/msigdb/human/geneset/KEGG_ASTHMA	HLA-DRB4	HLA-DRB5	HLA-DOA	HLA-DOB	HLA-DRB3	IL3	TNF	CCL11	EPX	FCER1G	MS4A2	HLA-DMB	FCER1A	HLA-DMA	IL9	CD40LG	HLA-DPA1	CD40	HLA-DPB1	IL13	HLA-DQA1	HLA-DQA2	HLA-DQB1	PRG2	RNASE3	IL4	IL5	IL10	HLA-DRB1	HLA-DRA
KEGG_AUTOIMMUNE_THYROID_DISEASE	http://www.gsea-msigdb.org/gsea/msigdb/human/geneset/KEGG_AUTOIMMUNE_THYROID_DISEASE	HLA-DOA	HLA-DOB	CD80	CD86	CD28	IFNA5	IFNA4	IFNA2	TSHR	TSHB	IFNA1	HLA-C	HLA-B	HLA-DMB	HLA-DMA	HLA-A	HLA-G	TG	CGA	IFNA17	IFNA21	IFNA6	IFNA7	PRF1	IFNA8	IFNA10	IFNA13	IFNA14	GZMB	IFNA16	TPO	IL10	CTLA4	HLA-DRB4	HLA-DRB5	HLA-DRB3	HLA-F	HLA-E	IL2	CD40LG	HLA-DPA1	CD40	HLA-DPB1	HLA-DQA1	HLA-DQA2	HLA-DQB1	FAS	FASLG
KEGG_ALLOGRAFT_REJECTION	http://www.gsea-msigdb.org/gsea/msigdb/human/geneset/KEGG_ALLOGRAFT_REJECTION	HLA-DRB4	HLA-DRB5	HLA-DOA	HLA-DOB	HLA-DRB3	CD80	CD86	CD28	TNF	IFNG	HLA-C	HLA-B	HLA-DMB	HLA-DMA	HLA-F	HLA-E	HLA-A	IL2	CD40LG	HLA-DPA1	CD40	IL12B	HLA-DPB1	HLA-DQA1	HLA-G	HLA-DQA2	IL12A	HLA-DQB1	PRF1	FAS	FASLG	GZMB	IL4	IL5	IL10	HLA-DRB1	HLA-DRA
KEGG_GRAFT_VERSUS_HOST_DISEASE	http://www.gsea-msigdb.org/gsea/msigdb/human/geneset/KEGG_GRAFT_VERSUS_HOST_DISEASE	HLA-DRB4	KIR2DL1	HLA-DRB5	HLA-DOA	HLA-DOB	HLA-DRB3	CD80	CD86	KLRD1	KLRC1	CD28	TNF	KIR2DL2	KIR2DL3	IFNG	HLA-C	HLA-B	HLA-DMB	IL1B	HLA-DMA	HLA-F	HLA-E	HLA-A	IL2	HLA-DPA1	HLA-DPB1	HLA-DQA1	HLA-G	KIR3DL1	HLA-DQA2	KIR3DL2	HLA-DQB1	IL1A	PRF1	FAS	FASLG	GZMB	KIR2DL5A	IL6	HLA-DRB1	HLA-DRA
KEGG_VIRAL_MYOCARDITIS	http://www.gsea-msigdb.org/gsea/msigdb/human/geneset/KEGG_VIRAL_MYOCARDITIS	CASP9	CASP8	HLA-DOA	HLA-DOB	CD80	CD86	CD28	EIF4G3	ITGAL	ICAM1	CXADR	MYH13	HLA-C	HLA-B	MYH14	HLA-DMB	HLA-DMA	MYH1	HLA-A	DMD	MYH15	RAC2	BID	HLA-G	RAC3	ABL1	ABL2	CASP3	EIF4G2	PRF1	EIF4G1	ITGB2	ACTG1	RAC1	SGCD	HLA-DRB4	SGCG	HLA-DRB5	SGCA	SGCB	HLA-DRB3	DAG1	CD55	LAMA2	ACTB	HLA-F	HLA-E	CD40LG
[truncated: 340 more columns]
