# Supplementary material for: Identification of hypoxia- and mitochondria-related genes associated with recurrent spontaneous abortion: an integrative bioinformatics analysis and preliminary validation
Source: PeerJ journal article supplement (doi:10.7717/peerj.20467), 2025-12-19
Supplement: Supplementary_Table_5.xlsx [file Supplementary_Table_5.xlsx]

## Sheet: Sheet1
Supplementary Table 5 RNA concentrations of endometria tissue samples used for RT-qPCR
number	Name of sample	group	concentration (ng/uL)	A260/A280
1	ZCTM1	Control	674.08	1.637
2	ZCTM2	Control	300.04	1.706
3	ZCTM3	Control	530.36	1.722
4	ZCTM4	Control	502.32	1.63
5	ZCTM5	Control	364.88	1.42
6	LCTM1	RPL	547.96	1.643
7	LCTM2	RPL	1960.8	1.635
8	LCTM3	RPL	192.6	1.623
9	LCTM4	RPL	669.68	1.606
10	LCTM6	RPL	679.36	1.62
