# Supplementary material for: Identification of hypoxia- and mitochondria-related genes associated with recurrent spontaneous abortion: an integrative bioinformatics analysis and preliminary validation
Source: PeerJ journal article supplement (doi:10.7717/peerj.20467), 2025-12-19
Supplement: Supplementary_Table_6.xlsx [file Supplementary_Table_6.xlsx]

## Sheet: Sheet1
Supplementary Table 6 Primer information for RT-qPCR analysis: accession numbers, sequences, and intron/exon locations
Gene	Accession	Primer	Sequences	Intron/Exon Location	product length
BSG	NM_198590	F	AGTGTAGCCACATTCCTGCC	Exon 1	122
		R	GGCGTCTCTTGGAGGTTGAA	Exon 1
TRAK1	NM_001349246.2	F	GAGGAGAAAGAGCGGGATTTAG	Exon 3-4	83
		R	TTCCTCTCGGTTAGGGTCTT	Exon 4
GAPDH		F	CGAAGGTGGAGTCAACGGATTT	Exon 2-3	148
	NM_001289745.3	R	ATGGGTGGAATCATATTGGAAC	Exon 4
