# Supplementary material for: Identification of hypoxia- and mitochondria-related genes associated with recurrent spontaneous abortion: an integrative bioinformatics analysis and preliminary validation
Source: PeerJ journal article supplement (doi:10.7717/peerj.20467), 2025-12-19
Supplement: Supplementary_Table_7.xlsx [file Supplementary_Table_7.xlsx]

## Sheet: Supplementary table x-11个候选基因
Supplementary Table 7 List of candidate genes
number	gene name
1	UCP3
2	BCL2
3	BSG
4	UCP2
5	CYBB
6	SLC8A1
7	TRAK1
8	ACE
9	PLAUR
10	EPAS1
11	DDIT4
