# Supplementary material for: Identification of hypoxia- and mitochondria-related genes associated with recurrent spontaneous abortion: an integrative bioinformatics analysis and preliminary validation
Source: PeerJ journal article supplement (doi:10.7717/peerj.20467), 2025-12-19
Supplement: Supplementary_Table_8.xlsx [file Supplementary_Table_8.xlsx]

## Sheet: GO
Supplementary Table 8 Results of candidate gene GO analysis
	ONTOLOGY	ID	Description	GeneRatio	BgRatio	pvalue	p.adjust	qvalue	geneID	Count
GO:0001666	BP	GO:0001666	response to hypoxia	2025-08-11	296/18903	5.21208117095405e-13	3.41463900699403e-10	1.574227487469e-10	UCP3/BCL2/UCP2/CYBB/SLC8A1/ACE/EPAS1/DDIT4	8
GO:0036293	BP	GO:0036293	response to decreased oxygen levels	2025-08-11	309/18903	7.36707444874655e-13	3.41463900699403e-10	1.574227487469e-10	UCP3/BCL2/UCP2/CYBB/SLC8A1/ACE/EPAS1/DDIT4	8
GO:0070482	BP	GO:0070482	response to oxygen levels	2025-08-11	337/18903	1.47994764324491e-12	4.57303821762677e-10	2.10827629178047e-10	UCP3/BCL2/UCP2/CYBB/SLC8A1/ACE/EPAS1/DDIT4	8
GO:0031960	BP	GO:0031960	response to corticosteroid	2025-05-11	165/18903	2.11169764694925e-08	4.89385929680489e-06	2.25618222279315e-06	UCP3/BCL2/CYBB/ACE/DDIT4	5
GO:0031667	BP	GO:0031667	response to nutrient levels	2025-06-11	474/18903	1.00028027591172e-07	1.85451963154033e-05	8.54976404252966e-06	UCP3/BCL2/UCP2/CYBB/SLC8A1/ACE	6
GO:0048545	BP	GO:0048545	response to steroid hormone	2025-05-11	339/18903	7.61591630524065e-07	0.000117665906915968	5.42467021039948e-05	UCP3/BCL2/CYBB/ACE/DDIT4	5
GO:0051384	BP	GO:0051384	response to glucocorticoid	2025-04-11	142/18903	9.66894556453986e-07	0.000128044464833264	5.9031457130875e-05	UCP3/BCL2/ACE/DDIT4	4
GO:0071456	BP	GO:0071456	cellular response to hypoxia	2025-04-11	151/18903	1.23617920670483e-06	0.000143242265576923	6.60379944634424e-05	BCL2/CYBB/SLC8A1/EPAS1	4
GO:0036294	BP	GO:0036294	cellular response to decreased oxygen levels	2025-04-11	159/18903	1.51917965640563e-06	0.000156475504609779	7.21388234503724e-05	BCL2/CYBB/SLC8A1/EPAS1	4
GO:0071453	BP	GO:0071453	cellular response to oxygen levels	2025-04-11	175/18903	2.22649946406724e-06	0.000206396500319034	9.51535560432949e-05	BCL2/CYBB/SLC8A1/EPAS1	4
GO:0006979	BP	GO:0006979	response to oxidative stress	2025-05-11	434/18903	2.56993805266464e-06	0.000216575688620011	9.98463970700331e-05	UCP3/BCL2/UCP2/SLC8A1/EPAS1	5
GO:0007565	BP	GO:0007565	female pregnancy	2025-04-11	189/18903	3.02428633382128e-06	0.000233626119287694	0.000107707039608021	BCL2/BSG/UCP2/ACE	4
GO:0000302	BP	GO:0000302	response to reactive oxygen species	2025-04-11	204/18903	4.09618881526222e-06	0.000292089771672929	0.000134660134331697	UCP3/BCL2/UCP2/SLC8A1	4
GO:0044703	BP	GO:0044703	multi-organism reproductive process	2025-04-11	209/18903	4.50926606748287e-06	0.000298577831754044	0.00013765127995474	BCL2/BSG/UCP2/ACE	4
GO:0044706	BP	GO:0044706	multi-multicellular organism process	2025-04-11	218/18903	5.32967916042617e-06	0.000329374172114337	0.000151849104500563	BCL2/BSG/UCP2/ACE	4
GO:0051481	BP	GO:0051481	negative regulation of cytosolic calcium ion concentration	2025-02-11	13/18903	2.3929413289434e-05	0.00138641038245658	0.000639167223388829	BCL2/SLC8A1	2
GO:1904044	BP	GO:1904044	response to aldosterone	2025-02-11	14/18903	2.79087865658309e-05	0.00152184971450149	0.000701607885184356	CYBB/ACE	2
GO:0043434	BP	GO:0043434	response to peptide hormone	2025-04-11	421/18903	7.07009552128191e-05	0.00364109919346018	0.00167863086645641	UCP3/BSG/UCP2/CYBB	4
GO:0009410	BP	GO:0009410	response to xenobiotic stimulus	2025-04-11	432/18903	7.81547863548196e-05	0.00381313089215357	0.00175794145485079	BCL2/CYBB/SLC8A1/ACE	4
GO:0007584	BP	GO:0007584	response to nutrient	2025-03-11	154/18903	8.3399160202223e-05	0.00386555107537304	0.00178210837063698	UCP3/CYBB/SLC8A1	3
GO:1990845	BP	GO:1990845	adaptive thermogenesis	2025-03-11	160/18903	9.34222038131958e-05	0.00412392299689679	0.00190122379690013	UCP3/UCP2/EPAS1	3
GO:0055067	BP	GO:0055067	monovalent inorganic cation homeostasis	2025-03-11	164/18903	0.000100523817839912	0.00423570814261813	0.00195275933220117	BCL2/SLC8A1/ACE	3
GO:0007568	BP	GO:0007568	aging	2025-03-11	169/18903	0.000109886196734381	0.00441838643777329	0.00203697824758525	UCP3/UCP2/ACE	3
GO:0000303	BP	GO:0000303	response to superoxide	2025-02-11	28/18903	0.000115414656335636	0.00441838643777329	0.00203697824758525	UCP3/UCP2	2
GO:0000305	BP	GO:0000305	response to oxygen radical	2025-02-11	29/18903	0.000123924538707773	0.00441838643777329	0.00203697824758525	UCP3/UCP2	2
GO:0060402	BP	GO:0060402	calcium ion transport into cytosol	2025-02-11	29/18903	0.000123924538707773	0.00441838643777329	0.00203697824758525	BCL2/SLC8A1	2
GO:0006839	BP	GO:0006839	mitochondrial transport	2025-03-11	189/18903	0.000153011452653105	0.00525339320775659	0.00242193566382692	UCP3/BCL2/UCP2	3
GO:0031099	BP	GO:0031099	regeneration	2025-03-11	192/18903	0.00016030075784154	0.00528338795558558	0.00243576393569267	BCL2/UCP2/ACE	3
GO:0009749	BP	GO:0009749	response to glucose	2025-03-11	194/18903	0.000165283981350574	0.00528338795558558	0.00243576393569267	UCP2/SLC8A1/ACE	3
GO:0009746	BP	GO:0009746	response to hexose	2025-03-11	199/18903	0.00017818155264291	0.00542049528594071	0.0024989735832532	UCP2/SLC8A1/ACE	3
GO:0060218	BP	GO:0060218	hematopoietic stem cell differentiation	2025-02-11	35/18903	0.000181267911396075	0.00542049528594071	0.0024989735832532	BCL2/ACE	2
GO:1901654	BP	GO:1901654	response to ketone	2025-03-11	205/18903	0.000194503542798217	0.0055284481493412	0.00254874234784821	CYBB/ACE/DDIT4	3
GO:0034284	BP	GO:0034284	response to monosaccharide	2025-03-11	207/18903	0.000200152916051677	0.0055284481493412	0.00254874234784821	UCP2/SLC8A1/ACE	3
GO:0051385	BP	GO:0051385	response to mineralocorticoid	2025-02-11	37/18903	0.000202769403535708	0.0055284481493412	0.00254874234784821	CYBB/ACE	2
GO:0071548	BP	GO:0071548	response to dexamethasone	2025-02-11	43/18903	0.000274402860284776	0.00709296321414388	0.00327001994542941	ACE/DDIT4	2
GO:0009743	BP	GO:0009743	response to carbohydrate	2025-03-11	234/18903	0.000287137722403417	0.00709296321414388	0.00327001994542941	UCP2/SLC8A1/ACE	3
GO:0042771	BP	GO:0042771	intrinsic apoptotic signaling pathway in response to DNA damage by p53 class mediator	2025-02-11	44/18903	0.000287378408340632	0.00709296321414388	0.00327001994542941	BCL2/DDIT4	2
GO:0072593	BP	GO:0072593	reactive oxygen species metabolic process	2025-03-11	235/18903	0.000290757931108379	0.00709296321414388	0.00327001994542941	BCL2/CYBB/DDIT4	3
GO:0001974	BP	GO:0001974	blood vessel remodeling	2025-02-11	48/18903	0.000342231955442481	0.00806448750732868	0.00371791509450456	ACE/EPAS1	2
GO:0060047	BP	GO:0060047	heart contraction	2025-03-11	250/18903	0.000348661701867207	0.00806448750732868	0.00371791509450456	SLC8A1/ACE/EPAS1	3
GO:0070509	BP	GO:0070509	calcium ion import	2025-02-11	49/18903	0.000356681755987568	0.00806448750732868	0.00371791509450456	SLC8A1/ACE	2
GO:0003015	BP	GO:0003015	heart process	2025-03-11	261/18903	0.000395550582028096	0.00872006979242926	0.00402015367708656	SLC8A1/ACE/EPAS1	3
GO:1903522	BP	GO:1903522	regulation of blood circulation	2025-03-11	263/18903	0.000404490831795532	0.00872006979242926	0.00402015367708656	SLC8A1/ACE/EPAS1	3
GO:0009409	BP	GO:0009409	response to cold	2025-02-11	53/18903	0.000417418077197442	0.00879423994459156	0.00405434783115219	UCP3/UCP2	2
GO:0051924	BP	GO:0051924	regulation of calcium ion transport	2025-03-11	268/18903	0.000427410900804482	0.00880466455657233	0.00405915381816654	BCL2/SLC8A1/ACE	3
GO:0055078	BP	GO:0055078	sodium ion homeostasis	2025-02-11	55/18903	0.000449544532729705	0.00905929960522689	0.00417654645968559	SLC8A1/ACE	2
GO:0001836	BP	GO:0001836	release of cytochrome c from mitochondria	2025-02-11	56/18903	0.000466046341376125	0.00919202039267379	0.0042377338096015	BCL2/PLAUR	2
GO:0097193	BP	GO:0097193	intrinsic apoptotic signaling pathway	2025-03-11	298/18903	0.000582668372160212	0.0112527829373441	0.00518779296265452	BCL2/PLAUR/DDIT4	3
GO:0071384	BP	GO:0071384	cellular response to corticosteroid stimulus	2025-02-11	64/18903	0.000608549396726744	0.0115127610360345	0.00530764887370694	ACE/DDIT4	2
GO:0031100	BP	GO:0031100	animal organ regeneration	2025-02-11	65/18903	0.0006276691151827	0.0116369853954873	0.00536491917398265	UCP2/ACE	2
GO:0051881	BP	GO:0051881	regulation of mitochondrial membrane potential	2025-02-11	70/18903	0.000727604105254772	0.0132252746190426	0.00609715720812048	BCL2/UCP2	2
GO:0051926	BP	GO:0051926	negative regulation of calcium ion transport	2025-02-11	74/18903	0.000812738917075401	0.0144886341563249	0.00667959514843346	BCL2/ACE	2
GO:0072332	BP	GO:0072332	intrinsic apoptotic signaling pathway by p53 class mediator	2025-02-11	81/18903	0.000972761335510345	0.0170141463776998	0.00784391464185104	BCL2/DDIT4	2
GO:0010038	BP	GO:0010038	response to metal ion	2025-03-11	360/18903	0.00100885745288665	0.0172093520231015	0.00793390895517992	BCL2/BSG/CYBB	3
GO:0042310	BP	GO:0042310	vasoconstriction	2025-02-11	83/18903	0.00102105109090677	0.0172093520231015	0.00793390895517992	SLC8A1/ACE	2
GO:0051899	BP	GO:0051899	membrane depolarization	2025-02-11	84/18903	0.00104562275220842	0.0173087909160215	0.00797975258264318	BCL2/SLC8A1	2
GO:0014910	BP	GO:0014910	regulation of smooth muscle cell migration	2025-02-11	87/18903	0.00112104153238743	0.0182316754477745	0.008405223677734	BCL2/ACE	2
GO:0051591	BP	GO:0051591	response to cAMP	2025-02-11	90/18903	0.00119901017367406	0.0191634901895837	0.00883481180601941	BSG/SLC8A1	2
GO:1990542	BP	GO:1990542	mitochondrial transmembrane transport	2025-02-11	91/18903	0.0012255650619473	0.0192559120750025	0.0088774204308761	UCP3/UCP2	2
GO:0014909	BP	GO:0014909	smooth muscle cell migration	2025-02-11	95/18903	0.00133460393614905	0.0206196308135028	0.00950612628204412	BCL2/ACE	2
GO:0120162	BP	GO:0120162	positive regulation of cold-induced thermogenesis	2025-02-11	98/18903	0.00141933563865213	0.0215692481480414	0.00994392181695884	UCP2/EPAS1	2
GO:0097306	BP	GO:0097306	cellular response to alcohol	2025-02-11	100/18903	0.00147722527508265	0.0220869004838971	0.0101825715056631	CYBB/ACE	2
GO:2001243	BP	GO:2001243	negative regulation of intrinsic apoptotic signaling pathway	2025-02-11	101/18903	0.00150658981707238	0.0221683930226365	0.010220141449146	BCL2/PLAUR	2
GO:0008630	BP	GO:0008630	intrinsic apoptotic signaling pathway in response to DNA damage	2025-02-11	102/18903	0.00153623380792385	0.022251386561647	0.0102584033884388	BCL2/DDIT4	2
GO:0010959	BP	GO:0010959	regulation of metal ion transport	2025-03-11	423/18903	0.00160593406714717	0.0227770626105113	0.0105007521942515	BCL2/SLC8A1/ACE	3
GO:1901655	BP	GO:1901655	cellular response to ketone	2025-02-11	105/18903	0.00162683972434032	0.0227770626105113	0.0105007521942515	ACE/DDIT4	2
GO:0002027	BP	GO:0002027	regulation of heart rate	2025-02-11	107/18903	0.00168863587562641	0.0227770626105113	0.0105007521942515	SLC8A1/EPAS1	2
GO:0042391	BP	GO:0042391	regulation of membrane potential	2025-03-11	431/18903	0.00169466172326009	0.0227770626105113	0.0105007521942515	BCL2/UCP2/SLC8A1	3
GO:0008637	BP	GO:0008637	apoptotic mitochondrial changes	2025-02-11	108/18903	0.00171995079043775	0.0227770626105113	0.0105007521942515	BCL2/PLAUR	2
GO:0014812	BP	GO:0014812	muscle cell migration	2025-02-11	108/18903	0.00171995079043775	0.0227770626105113	0.0105007521942515	BCL2/ACE	2
GO:0006816	BP	GO:0006816	calcium ion transport	2025-03-11	440/18903	0.00179812220328221	0.0230551199102106	0.0106289430347419	BCL2/SLC8A1/ACE	3
GO:0018107	BP	GO:0018107	peptidyl-threonine phosphorylation	2025-02-11	111/18903	0.00181555960457969	0.0230551199102106	0.0106289430347419	BCL2/DDIT4	2
GO:0018958	BP	GO:0018958	phenol-containing compound metabolic process	2025-02-11	111/18903	0.00181555960457969	0.0230551199102106	0.0106289430347419	BCL2/EPAS1	2
GO:0030004	BP	GO:0030004	cellular monovalent inorganic cation homeostasis	2025-02-11	114/18903	0.00191365877943474	0.0239724552504865	0.0110518558243315	BCL2/SLC8A1	2
GO:0018210	BP	GO:0018210	peptidyl-threonine modification	2025-02-11	120/18903	0.00211729873335538	0.0261698123442725	0.0120648882209443	BCL2/DDIT4	2
GO:0030278	BP	GO:0030278	regulation of ossification	2025-02-11	122/18903	0.00218737564947889	0.0266802266719333	0.0123002010206154	BCL2/SLC8A1	2
GO:0051051	BP	GO:0051051	negative regulation of transport	2025-03-11	479/18903	0.00229235199431842	0.027269763116188	0.0125719909443846	BCL2/UCP2/ACE	3
GO:0003014	BP	GO:0003014	renal system process	2025-02-11	125/18903	0.00229454317482488	0.027269763116188	0.0125719909443846	BCL2/ACE	2
GO:0046683	BP	GO:0046683	response to organophosphorus	2025-02-11	128/18903	0.00240416677518699	0.0282109189949157	0.0130058855526438	BSG/SLC8A1	2
GO:0042542	BP	GO:0042542	response to hydrogen peroxide	2025-02-11	130/18903	0.00247861005273179	0.0287208939860296	0.0132409958080145	BCL2/SLC8A1	2
GO:0002244	BP	GO:0002244	hematopoietic progenitor cell differentiation	2025-02-11	133/18903	0.00259231088139772	0.029667557864885	0.0136774297316111	BCL2/ACE	2
GO:0071333	BP	GO:0071333	cellular response to glucose stimulus	2025-02-11	136/18903	0.00270844833208074	0.0306186780955956	0.01411591813639	UCP2/ACE	2
GO:0071331	BP	GO:0071331	cellular response to hexose stimulus	2025-02-11	138/18903	0.00278722338791411	0.0311295913324865	0.0143514609447448	UCP2/ACE	2
GO:0071326	BP	GO:0071326	cellular response to monosaccharide stimulus	2025-02-11	140/18903	0.00286707600565042	0.031640231633785	0.0145868779234846	UCP2/ACE	2
GO:0014074	BP	GO:0014074	response to purine-containing compound	2025-02-11	142/18903	0.00294800403779343	0.0318690557711433	0.0146923711384593	BSG/SLC8A1	2
GO:0033135	BP	GO:0033135	regulation of peptidyl-serine phosphorylation	2025-02-11	143/18903	0.00298887066393534	0.0318690557711433	0.0146923711384593	BCL2/DDIT4	2
GO:0008584	BP	GO:0008584	male gonad development	2025-02-11	147/18903	0.00315501498832144	0.0318690557711433	0.0146923711384593	BCL2/ACE	2
GO:0035296	BP	GO:0035296	regulation of tube diameter	2025-02-11	147/18903	0.00315501498832144	0.0318690557711433	0.0146923711384593	SLC8A1/ACE	2
GO:0097746	BP	GO:0097746	blood vessel diameter maintenance	2025-02-11	147/18903	0.00315501498832144	0.0318690557711433	0.0146923711384593	SLC8A1/ACE	2
GO:0106106	BP	GO:0106106	cold-induced thermogenesis	2025-02-11	147/18903	0.00315501498832144	0.0318690557711433	0.0146923711384593	UCP2/EPAS1	2
GO:0120161	BP	GO:0120161	regulation of cold-induced thermogenesis	2025-02-11	147/18903	0.00315501498832144	0.0318690557711433	0.0146923711384593	UCP2/EPAS1	2
GO:0035150	BP	GO:0035150	regulation of tube size	2025-02-11	148/18903	0.00319721918739625	0.0318690557711433	0.0146923711384593	SLC8A1/ACE	2
GO:0046546	BP	GO:0046546	development of primary male sexual characteristics	2025-02-11	148/18903	0.00319721918739625	0.0318690557711433	0.0146923711384593	BCL2/ACE	2
GO:0001890	BP	GO:0001890	placenta development	2025-02-11	150/18903	0.00328242745777884	0.0323703218442658	0.0149234663813909	BSG/EPAS1	2
GO:0071322	BP	GO:0071322	cellular response to carbohydrate stimulus	2025-02-11	152/18903	0.00336870044674399	0.0328714243592809	0.0151544862202555	UCP2/ACE	2
GO:0034763	BP	GO:0034763	negative regulation of transmembrane transport	2025-02-11	154/18903	0.00345603602343883	0.0333723478513312	0.0153854235253966	BCL2/ACE	2
GO:0001678	BP	GO:0001678	cellular glucose homeostasis	2025-02-11	158/18903	0.00363388643042419	0.0347279661959095	0.0160103949077832	UCP2/ACE	2
GO:1902600	BP	GO:1902600	proton transmembrane transport	2025-02-11	160/18903	0.00372439701281878	0.0352297554171736	0.0162417313340969	UCP3/UCP2	2
GO:0043271	BP	GO:0043271	negative regulation of ion transport	2025-02-11	167/18903	0.0040494711387303	0.037917775208111	0.0174809705722967	BCL2/ACE	2
GO:0046661	BP	GO:0046661	male sex differentiation	2025-02-11	171/18903	0.00424099041010981	0.0393139811017179	0.0181246537526798	BCL2/ACE	2
GO:2001242	BP	GO:2001242	regulation of intrinsic apoptotic signaling pathway	2025-02-11	172/18903	0.00428952243688038	0.03937017127711	0.0181505587219743	BCL2/PLAUR	2
GO:0072331	BP	GO:0072331	signal transduction by p53 class mediator	2025-02-11	173/18903	0.0043383148213018	0.0394276258759487	0.0181770466196959	BCL2/DDIT4	2
GO:0009267	BP	GO:0009267	cellular response to starvation	2025-02-11	175/18903	0.00443667961262684	0.0395461730856258	0.0182316996227378	BCL2/UCP2	2
GO:0051048	BP	GO:0051048	negative regulation of secretion	2025-02-11	175/18903	0.00443667961262684	0.0395461730856258	0.0182316996227378	UCP2/ACE	2
GO:0051099	BP	GO:0051099	positive regulation of binding	2025-02-11	177/18903	0.00453608268485327	0.0400471299891332	0.0184626523313326	ACE/PLAUR	2
GO:0001659	BP	GO:0001659	temperature homeostasis	2025-02-11	178/18903	0.00458617292104184	0.0401073801679791	0.0184904290560376	UCP2/EPAS1	2
GO:0048771	BP	GO:0048771	tissue remodeling	2025-02-11	179/18903	0.00463652194148189	0.0401687461659225	0.0185187201991308	ACE/EPAS1	2
GO:0097553	BP	GO:0097553	calcium ion transmembrane import into cytosol	2025-02-11	182/18903	0.0047891190928039	0.0411066055465668	0.0189510950455983	BCL2/SLC8A1	2
GO:0009266	BP	GO:0009266	response to temperature stimulus	2025-02-11	186/18903	0.00499618908765154	0.0421626238933144	0.0194379439058487	UCP3/UCP2	2
GO:0030324	BP	GO:0030324	lung development	2025-02-11	187/18903	0.00504859897751661	0.0421626238933144	0.0194379439058487	ACE/EPAS1	2
GO:0048469	BP	GO:0048469	cell maturation	2025-02-11	187/18903	0.00504859897751661	0.0421626238933144	0.0194379439058487	BCL2/EPAS1	2
GO:1903169	BP	GO:1903169	regulation of calcium ion transmembrane transport	2025-02-11	188/18903	0.00510126530303849	0.0422220797849703	0.0194653544458048	BCL2/SLC8A1	2
GO:0030323	BP	GO:0030323	respiratory tube development	2025-02-11	191/18903	0.00526080029334267	0.0427786129116549	0.0197219290775358	ACE/EPAS1	2
GO:0055001	BP	GO:0055001	muscle cell development	2025-02-11	191/18903	0.00526080029334267	0.0427786129116549	0.0197219290775358	BCL2/SLC8A1	2
GO:0002002	BP	GO:0002002	regulation of angiotensin levels in blood	2025-01-11	10/18903	0.00580534598891391	0.04484629776436	0.0206751795745531	ACE	1
GO:0046689	BP	GO:0046689	response to mercury ion	2025-01-11	10/18903	0.00580534598891391	0.04484629776436	0.0206751795745531	BSG	1
GO:0071838	BP	GO:0071838	cell proliferation in bone marrow	2025-01-11	10/18903	0.00580534598891391	0.04484629776436	0.0206751795745531	ACE	1
GO:0090281	BP	GO:0090281	negative regulation of calcium ion import	2025-01-11	10/18903	0.00580534598891391	0.04484629776436	0.0206751795745531	ACE	1
GO:0099566	BP	GO:0099566	regulation of postsynaptic cytosolic calcium ion concentration	2025-01-11	10/18903	0.00580534598891391	0.04484629776436	0.0206751795745531	SLC8A1	1
GO:1903596	BP	GO:1903596	regulation of gap junction assembly	2025-01-11	10/18903	0.00580534598891391	0.04484629776436	0.0206751795745531	ACE	1
GO:0007204	BP	GO:0007204	positive regulation of cytosolic calcium ion concentration	2025-02-11	205/18903	0.00603557610722926	0.0455242012004448	0.0209877087235344	BCL2/SLC8A1	2
GO:0071383	BP	GO:0071383	cellular response to steroid hormone stimulus	2025-02-11	209/18903	0.00626603562917593	0.0455242012004448	0.0209877087235344	ACE/DDIT4	2
GO:0042594	BP	GO:0042594	response to starvation	2025-02-11	211/18903	0.00638277093141906	0.0455242012004448	0.0209877087235344	BCL2/UCP2	2
GO:0060541	BP	GO:0060541	respiratory system development	2025-02-11	211/18903	0.00638277093141906	0.0455242012004448	0.0209877087235344	ACE/EPAS1	2
GO:0021548	BP	GO:0021548	pons development	2025-01-11	11/18903	0.00638419218560715	0.0455242012004448	0.0209877087235344	BCL2	1
GO:0044557	BP	GO:0044557	relaxation of smooth muscle	2025-01-11	11/18903	0.00638419218560715	0.0455242012004448	0.0209877087235344	SLC8A1	1
GO:0048742	BP	GO:0048742	regulation of skeletal muscle fiber development	2025-01-11	11/18903	0.00638419218560715	0.0455242012004448	0.0209877087235344	BCL2	1
GO:0071313	BP	GO:0071313	cellular response to caffeine	2025-01-11	11/18903	0.00638419218560715	0.0455242012004448	0.0209877087235344	SLC8A1	1
GO:2000169	BP	GO:2000169	regulation of peptidyl-cysteine S-nitrosylation	2025-01-11	11/18903	0.00638419218560715	0.0455242012004448	0.0209877087235344	ACE	1
GO:2000672	BP	GO:2000672	negative regulation of motor neuron apoptotic process	2025-01-11	11/18903	0.00638419218560715	0.0455242012004448	0.0209877087235344	BCL2	1
GO:0008016	BP	GO:0008016	regulation of heart contraction	2025-02-11	214/18903	0.00655975004349144	0.0464189945825692	0.0214002291495181	SLC8A1/EPAS1	2
GO:0042447	BP	GO:0042447	hormone catabolic process	2025-01-11	12/18903	0.00696273198477881	0.0488973678021967	0.0225428164738453	ACE	1
GO:0003084	BP	GO:0003084	positive regulation of systemic arterial blood pressure	2025-01-11	13/18903	0.00754096553240335	0.0505115019279201	0.0232869696051048	ACE	1
GO:0034616	BP	GO:0034616	response to laminar fluid shear stress	2025-01-11	13/18903	0.00754096553240335	0.0505115019279201	0.0232869696051048	ACE	1
GO:0042415	BP	GO:0042415	norepinephrine metabolic process	2025-01-11	13/18903	0.00754096553240335	0.0505115019279201	0.0232869696051048	EPAS1	1
GO:0071389	BP	GO:0071389	cellular response to mineralocorticoid stimulus	2025-01-11	13/18903	0.00754096553240335	0.0505115019279201	0.0232869696051048	ACE	1
GO:0097048	BP	GO:0097048	dendritic cell apoptotic process	2025-01-11	13/18903	0.00754096553240335	0.0505115019279201	0.0232869696051048	BCL2	1
GO:2000668	BP	GO:2000668	regulation of dendritic cell apoptotic process	2025-01-11	13/18903	0.00754096553240335	0.0505115019279201	0.0232869696051048	BCL2	1
GO:0031669	BP	GO:0031669	cellular response to nutrient levels	2025-02-11	231/18903	0.00760483971633085	0.0505115019279201	0.0232869696051048	BCL2/UCP2	2
GO:0008406	BP	GO:0008406	gonad development	2025-02-11	233/18903	0.0077324733846074	0.0505115019279201	0.0232869696051048	BCL2/ACE	2
GO:2001234	BP	GO:2001234	negative regulation of apoptotic signaling pathway	2025-02-11	233/18903	0.0077324733846074	0.0505115019279201	0.0232869696051048	BCL2/PLAUR	2
GO:0045137	BP	GO:0045137	development of primary sexual characteristics	2025-02-11	238/18903	0.00805583443132172	0.0505115019279201	0.0232869696051048	BCL2/ACE	2
GO:0031000	BP	GO:0031000	response to caffeine	2025-01-11	14/18903	0.00811889297439061	0.0505115019279201	0.0232869696051048	SLC8A1	1
GO:0043374	BP	GO:0043374	CD8-positive, alpha-beta T cell differentiation	2025-01-11	14/18903	0.00811889297439061	0.0505115019279201	0.0232869696051048	BCL2	1
GO:0045820	BP	GO:0045820	negative regulation of glycolytic process	2025-01-11	14/18903	0.00811889297439061	0.0505115019279201	0.0232869696051048	DDIT4	1
GO:0048070	BP	GO:0048070	regulation of developmental pigmentation	2025-01-11	14/18903	0.00811889297439061	0.0505115019279201	0.0232869696051048	BCL2	1
GO:0071361	BP	GO:0071361	cellular response to ethanol	2025-01-11	14/18903	0.00811889297439061	0.0505115019279201	0.0232869696051048	CYBB	1
GO:0071415	BP	GO:0071415	cellular response to purine-containing compound	2025-01-11	14/18903	0.00811889297439061	0.0505115019279201	0.0232869696051048	SLC8A1	1
GO:0120305	BP	GO:0120305	regulation of pigmentation	2025-01-11	14/18903	0.00811889297439061	0.0505115019279201	0.0232869696051048	BCL2	1
GO:0002903	BP	GO:0002903	negative regulation of B cell apoptotic process	2025-01-11	15/18903	0.00869651445659114	0.0509945950788471	0.0235096867109657	BCL2	1
GO:0010649	BP	GO:0010649	regulation of cell communication by electrical coupling	2025-01-11	15/18903	0.00869651445659114	0.0509945950788471	0.0235096867109657	SLC8A1	1
GO:0033689	BP	GO:0033689	negative regulation of osteoblast proliferation	2025-01-11	15/18903	0.00869651445659114	0.0509945950788471	0.0235096867109657	BCL2	1
GO:0043129	BP	GO:0043129	surfactant homeostasis	2025-01-11	15/18903	0.00869651445659114	0.0509945950788471	0.0235096867109657	EPAS1	1
GO:0048311	BP	GO:0048311	mitochondrion distribution	2025-01-11	15/18903	0.00869651445659114	0.0509945950788471	0.0235096867109657	TRAK1	1
GO:1902166	BP	GO:1902166	negative regulation of intrinsic apoptotic signaling pathway in response to DNA damage by p53 class mediator	2025-01-11	15/18903	0.00869651445659114	0.0509945950788471	0.0235096867109657	BCL2	1
GO:2000671	BP	GO:2000671	regulation of motor neuron apoptotic process	2025-01-11	15/18903	0.00869651445659114	0.0509945950788471	0.0235096867109657	BCL2	1
GO:0042593	BP	GO:0042593	glucose homeostasis	2025-02-11	248/18903	0.00872077900987203	0.0509945950788471	0.0235096867109657	UCP2/ACE	2
GO:0048863	BP	GO:0048863	stem cell differentiation	2025-02-11	248/18903	0.00872077900987203	0.0509945950788471	0.0235096867109657	BCL2/ACE	2
GO:0033500	BP	GO:0033500	carbohydrate homeostasis	2025-02-11	249/18903	0.00878860242115843	0.0509945950788471	0.0235096867109657	UCP2/ACE	2
GO:0016485	BP	GO:0016485	protein processing	2025-02-11	250/18903	0.00885666645921724	0.0509945950788471	0.0235096867109657	ACE/PLAUR	2
GO:0071695	BP	GO:0071695	anatomical structure maturation	2025-02-11	250/18903	0.00885666645921724	0.0509945950788471	0.0235096867109657	BCL2/EPAS1	2
GO:0097305	BP	GO:0097305	response to alcohol	2025-02-11	253/18903	0.00906229983739145	0.0511446235242772	0.023578853291156	CYBB/ACE	2
GO:0034112	BP	GO:0034112	positive regulation of homotypic cell-cell adhesion	2025-01-11	16/18903	0.00927383012479166	0.0511446235242772	0.023578853291156	PLAUR	1
GO:0036376	BP	GO:0036376	sodium ion export across plasma membrane	2025-01-11	16/18903	0.00927383012479166	0.0511446235242772	0.023578853291156	SLC8A1	1
GO:0046325	BP	GO:0046325	negative regulation of glucose import	2025-01-11	16/18903	0.00927383012479166	0.0511446235242772	0.023578853291156	ACE	1
GO:1902033	BP	GO:1902033	regulation of hematopoietic stem cell proliferation	2025-01-11	16/18903	0.00927383012479166	0.0511446235242772	0.023578853291156	ACE	1
GO:0031668	BP	GO:0031668	cellular response to extracellular stimulus	2025-02-11	262/18903	0.00969211306111084	0.0511446235242772	0.023578853291156	BCL2/UCP2	2
GO:0001991	BP	GO:0001991	regulation of systemic arterial blood pressure by circulatory renin-angiotensin	2025-01-11	17/18903	0.00985084012471904	0.0511446235242772	0.023578853291156	ACE	1
GO:0010224	BP	GO:0010224	response to UV-B	2025-01-11	17/18903	0.00985084012471904	0.0511446235242772	0.023578853291156	BCL2	1
GO:0010763	BP	GO:0010763	positive regulation of fibroblast migration	2025-01-11	17/18903	0.00985084012471904	0.0511446235242772	0.023578853291156	SLC8A1	1
GO:0017014	BP	GO:0017014	protein nitrosylation	2025-01-11	17/18903	0.00985084012471904	0.0511446235242772	0.023578853291156	ACE	1
GO:0018119	BP	GO:0018119	peptidyl-cysteine S-nitrosylation	2025-01-11	17/18903	0.00985084012471904	0.0511446235242772	0.023578853291156	ACE	1
GO:0048875	BP	GO:0048875	chemical homeostasis within a tissue	2025-01-11	17/18903	0.00985084012471904	0.0511446235242772	0.023578853291156	EPAS1	1
GO:0055119	BP	GO:0055119	relaxation of cardiac muscle	2025-01-11	17/18903	0.00985084012471904	0.0511446235242772	0.023578853291156	SLC8A1	1
GO:0070593	BP	GO:0070593	dendrite self-avoidance	2025-01-11	17/18903	0.00985084012471904	0.0511446235242772	0.023578853291156	BSG	1
GO:0110096	BP	GO:0110096	cellular response to aldehyde	2025-01-11	17/18903	0.00985084012471904	0.0511446235242772	0.023578853291156	ACE	1
GO:1902165	BP	GO:1902165	regulation of intrinsic apoptotic signaling pathway in response to DNA damage by p53 class mediator	2025-01-11	17/18903	0.00985084012471904	0.0511446235242772	0.023578853291156	BCL2	1
GO:2001267	BP	GO:2001267	regulation of cysteine-type endopeptidase activity involved in apoptotic signaling pathway	2025-01-11	17/18903	0.00985084012471904	0.0511446235242772	0.023578853291156	PLAUR	1
GO:0032868	BP	GO:0032868	response to insulin	2025-02-11	269/18903	0.0101952710895621	0.0511446235242772	0.023578853291156	UCP3/UCP2	2
GO:0003018	BP	GO:0003018	vascular process in circulatory system	2025-02-11	270/18903	0.0102680954346433	0.0511446235242772	0.023578853291156	SLC8A1/ACE	2
GO:0010522	BP	GO:0010522	regulation of calcium ion transport into cytosol	2025-01-11	18/18903	0.0104275446020371	0.0511446235242772	0.023578853291156	BCL2	1
GO:0010755	BP	GO:0010755	regulation of plasminogen activation	2025-01-11	18/18903	0.0104275446020371	0.0511446235242772	0.023578853291156	PLAUR	1
GO:0016264	BP	GO:0016264	gap junction assembly	2025-01-11	18/18903	0.0104275446020371	0.0511446235242772	0.023578853291156	ACE	1
GO:0019896	BP	GO:0019896	axonal transport of mitochondrion	2025-01-11	18/18903	0.0104275446020371	0.0511446235242772	0.023578853291156	TRAK1	1
GO:0033033	BP	GO:0033033	negative regulation of myeloid cell apoptotic process	2025-01-11	18/18903	0.0104275446020371	0.0511446235242772	0.023578853291156	BCL2	1
GO:0050665	BP	GO:0050665	hydrogen peroxide biosynthetic process	2025-01-11	18/18903	0.0104275446020371	0.0511446235242772	0.023578853291156	CYBB	1
GO:0051900	BP	GO:0051900	regulation of mitochondrial depolarization	2025-01-11	18/18903	0.0104275446020371	0.0511446235242772	0.023578853291156	BCL2	1
GO:0051917	BP	GO:0051917	regulation of fibrinolysis	2025-01-11	18/18903	0.0104275446020371	0.0511446235242772	0.023578853291156	PLAUR	1
GO:2000811	BP	GO:2000811	negative regulation of anoikis	2025-01-11	18/18903	0.0104275446020371	0.0511446235242772	0.023578853291156	BCL2	1
GO:0001894	BP	GO:0001894	tissue homeostasis	2025-02-11	275/18903	0.0106357434842515	0.0518912326836903	0.0239230573662389	BCL2/EPAS1	2
GO:0010801	BP	GO:0010801	negative regulation of peptidyl-threonine phosphorylation	2025-01-11	19/18903	0.0110039437023483	0.0525807000622517	0.0242409177599207	DDIT4	1
GO:0035813	BP	GO:0035813	regulation of renal sodium excretion	2025-01-11	19/18903	0.0110039437023483	0.0525807000622517	0.0242409177599207	ACE	1
GO:0060977	BP	GO:0060977	coronary vasculature morphogenesis	2025-01-11	19/18903	0.0110039437023483	0.0525807000622517	0.0242409177599207	ACE	1
GO:2000434	BP	GO:2000434	regulation of protein neddylation	2025-01-11	19/18903	0.0110039437023483	0.0525807000622517	0.0242409177599207	EPAS1	1
GO:0045165	BP	GO:0045165	cell fate commitment	2025-02-11	282/18903	0.0111602797365708	0.0530542529015442	0.0244592365616612	BCL2/EPAS1	2
GO:0006874	BP	GO:0006874	cellular calcium ion homeostasis	2025-02-11	284/18903	0.0113122431522776	0.0535022928681703	0.0246657933395528	BCL2/SLC8A1	2
GO:0048643	BP	GO:0048643	positive regulation of skeletal muscle tissue development	2025-01-11	20/18903	0.0115800375711935	0.0535859121623799	0.0247043437664523	BCL2	1
GO:0051882	BP	GO:0051882	mitochondrial depolarization	2025-01-11	20/18903	0.0115800375711935	0.0535859121623799	0.0247043437664523	BCL2	1
GO:1903579	BP	GO:1903579	negative regulation of ATP metabolic process	2025-01-11	20/18903	0.0115800375711935	0.0535859121623799	0.0247043437664523	DDIT4	1
GO:0007548	BP	GO:0007548	sex differentiation	2025-02-11	288/18903	0.0116189518280889	0.0535859121623799	0.0247043437664523	BCL2/ACE	2
GO:0034599	BP	GO:0034599	cellular response to oxidative stress	2025-02-11	288/18903	0.0116189518280889	0.0535859121623799	0.0247043437664523	BCL2/EPAS1	2
GO:0051146	BP	GO:0051146	striated muscle cell differentiation	2025-02-11	293/18903	0.0120075335277815	0.0539740920764139	0.0248833036768569	BCL2/SLC8A1	2
GO:0010829	BP	GO:0010829	negative regulation of glucose transmembrane transport	2025-01-11	21/18903	0.012155826354052	0.0539740920764139	0.0248833036768569	ACE	1
GO:0035812	BP	GO:0035812	renal sodium excretion	2025-01-11	21/18903	0.012155826354052	0.0539740920764139	0.0248833036768569	ACE	1
GO:0035902	BP	GO:0035902	response to immobilization stress	2025-01-11	21/18903	0.012155826354052	0.0539740920764139	0.0248833036768569	SLC8A1	1
GO:0038083	BP	GO:0038083	peptidyl-tyrosine autophosphorylation	2025-01-11	21/18903	0.012155826354052	0.0539740920764139	0.0248833036768569	ACE	1
GO:0097049	BP	GO:0097049	motor neuron apoptotic process	2025-01-11	21/18903	0.012155826354052	0.0539740920764139	0.0248833036768569	BCL2	1
GO:1903429	BP	GO:1903429	regulation of cell maturation	2025-01-11	21/18903	0.012155826354052	0.0539740920764139	0.0248833036768569	BCL2	1
GO:0048872	BP	GO:0048872	homeostasis of number of cells	2025-02-11	296/18903	0.0122434420008407	0.0539740920764139	0.0248833036768569	BCL2/EPAS1	2
GO:0002070	BP	GO:0002070	epithelial cell maturation	2025-01-11	22/18903	0.0127313101963413	0.0539740920764139	0.0248833036768569	EPAS1	1
GO:0002902	BP	GO:0002902	regulation of B cell apoptotic process	2025-01-11	22/18903	0.0127313101963413	0.0539740920764139	0.0248833036768569	BCL2	1
GO:0006883	BP	GO:0006883	cellular sodium ion homeostasis	2025-01-11	22/18903	0.0127313101963413	0.0539740920764139	0.0248833036768569	SLC8A1	1
GO:0010881	BP	GO:0010881	regulation of cardiac muscle contraction by regulation of the release of sequestered calcium ion	2025-01-11	22/18903	0.0127313101963413	0.0539740920764139	0.0248833036768569	SLC8A1	1
GO:0044062	BP	GO:0044062	regulation of excretion	2025-01-11	22/18903	0.0127313101963413	0.0539740920764139	0.0248833036768569	ACE	1
GO:0086012	BP	GO:0086012	membrane depolarization during cardiac muscle cell action potential	2025-01-11	22/18903	0.0127313101963413	0.0539740920764139	0.0248833036768569	SLC8A1	1
GO:0021700	BP	GO:0021700	developmental maturation	2025-02-11	304/18903	0.0128825923960107	0.0539740920764139	0.0248833036768569	BCL2/EPAS1	2
GO:0051607	BP	GO:0051607	defense response to virus	2025-02-11	304/18903	0.0128825923960107	0.0539740920764139	0.0248833036768569	BCL2/DDIT4	2
GO:0140546	BP	GO:0140546	defense response to symbiont	2025-02-11	305/18903	0.0129635108257304	0.0539740920764139	0.0248833036768569	BCL2/DDIT4	2
GO:0048608	BP	GO:0048608	reproductive structure development	2025-02-11	306/18903	0.0130446561473957	0.0539740920764139	0.0248833036768569	BCL2/ACE	2
GO:0010720	BP	GO:0010720	positive regulation of cell development	2025-02-11	307/18903	0.0131260281203419	0.0539740920764139	0.0248833036768569	BCL2/ACE	2
GO:0001822	BP	GO:0001822	kidney development	2025-02-11	309/18903	0.0132894510582183	0.0539740920764139	0.0248833036768569	BCL2/ACE	2
GO:0055074	BP	GO:0055074	calcium ion homeostasis	2025-02-11	309/18903	0.0132894510582183	0.0539740920764139	0.0248833036768569	BCL2/SLC8A1	2
GO:0002363	BP	GO:0002363	alpha-beta T cell lineage commitment	2025-01-11	23/18903	0.0133064892434173	0.0539740920764139	0.0248833036768569	BCL2	1
GO:1900543	BP	GO:1900543	negative regulation of purine nucleotide metabolic process	2025-01-11	23/18903	0.0133064892434173	0.0539740920764139	0.0248833036768569	DDIT4	1
GO:1902254	BP	GO:1902254	negative regulation of intrinsic apoptotic signaling pathway by p53 class mediator	2025-01-11	23/18903	0.0133064892434173	0.0539740920764139	0.0248833036768569	BCL2	1
GO:0061458	BP	GO:0061458	reproductive system development	2025-02-11	310/18903	0.0133715015426184	0.0539740920764139	0.0248833036768569	BCL2/ACE	2
GO:0032943	BP	GO:0032943	mononuclear cell proliferation	2025-02-11	312/18903	0.0135362793422135	0.0539740920764139	0.0248833036768569	BCL2/ACE	2
GO:0018105	BP	GO:0018105	peptidyl-serine phosphorylation	2025-02-11	313/18903	0.0136190061778358	0.0539740920764139	0.0248833036768569	BCL2/DDIT4	2
GO:0002320	BP	GO:0002320	lymphoid progenitor cell differentiation	2025-01-11	24/18903	0.0138813636405746	0.0539740920764139	0.0248833036768569	BCL2	1
GO:0010623	BP	GO:0010623	programmed cell death involved in cell development	2025-01-11	24/18903	0.0138813636405746	0.0539740920764139	0.0248833036768569	BCL2	1
GO:0043369	BP	GO:0043369	CD4-positive or CD8-positive, alpha-beta T cell lineage commitment	2025-01-11	24/18903	0.0138813636405746	0.0539740920764139	0.0248833036768569	BCL2	1
GO:0048011	BP	GO:0048011	neurotrophin TRK receptor signaling pathway	2025-01-11	24/18903	0.0138813636405746	0.0539740920764139	0.0248833036768569	DDIT4	1
GO:0070233	BP	GO:0070233	negative regulation of T cell apoptotic process	2025-01-11	24/18903	0.0138813636405746	0.0539740920764139	0.0248833036768569	BCL2	1
GO:1901863	BP	GO:1901863	positive regulation of muscle tissue development	2025-01-11	24/18903	0.0138813636405746	0.0539740920764139	0.0248833036768569	BCL2	1
GO:0072001	BP	GO:0072001	renal system development	2025-02-11	318/18903	0.0140360101370727	0.0539740920764139	0.0248833036768569	BCL2/ACE	2
GO:0019058	BP	GO:0019058	viral life cycle	2025-02-11	319/18903	0.0141200832116557	0.0539740920764139	0.0248833036768569	BCL2/BSG	2
GO:0009101	BP	GO:0009101	glycoprotein biosynthetic process	2025-02-11	321/18903	0.0142888997338593	0.0539740920764139	0.0248833036768569	BCL2/TRAK1	2
GO:0003081	BP	GO:0003081	regulation of systemic arterial blood pressure by renin-angiotensin	2025-01-11	25/18903	0.0144559335330449	0.0539740920764139	0.0248833036768569	ACE	1
GO:0006582	BP	GO:0006582	melanin metabolic process	2025-01-11	25/18903	0.0144559335330449	0.0539740920764139	0.0248833036768569	BCL2	1
GO:0032469	BP	GO:0032469	endoplasmic reticulum calcium ion homeostasis	2025-01-11	25/18903	0.0144559335330449	0.0539740920764139	0.0248833036768569	BCL2	1
GO:0045980	BP	GO:0045980	negative regulation of nucleotide metabolic process	2025-01-11	25/18903	0.0144559335330449	0.0539740920764139	0.0248833036768569	DDIT4	1
GO:0046697	BP	GO:0046697	decidualization	2025-01-11	25/18903	0.0144559335330449	0.0539740920764139	0.0248833036768569	BSG	1
GO:0086064	BP	GO:0086064	cell communication by electrical coupling involved in cardiac conduction	2025-01-11	25/18903	0.0144559335330449	0.0539740920764139	0.0248833036768569	SLC8A1	1
GO:0098719	BP	GO:0098719	sodium ion import across plasma membrane	2025-01-11	25/18903	0.0144559335330449	0.0539740920764139	0.0248833036768569	SLC8A1	1
GO:2000209	BP	GO:2000209	regulation of anoikis	2025-01-11	25/18903	0.0144559335330449	0.0539740920764139	0.0248833036768569	BCL2	1
GO:0072503	BP	GO:0072503	cellular divalent inorganic cation homeostasis	2025-02-11	323/18903	0.0144586084980112	0.0539740920764139	0.0248833036768569	BCL2/SLC8A1	2
GO:1901214	BP	GO:1901214	regulation of neuron death	2025-02-11	325/18903	0.0146292075998096	0.0539740920764139	0.0248833036768569	BCL2/DDIT4	2
GO:0071496	BP	GO:0071496	cellular response to external stimulus	2025-02-11	328/18903	0.0148867714761725	0.0539740920764139	0.0248833036768569	BCL2/UCP2	2
GO:0002026	BP	GO:0002026	regulation of the force of heart contraction	2025-01-11	26/18903	0.0150301990660004	0.0539740920764139	0.0248833036768569	SLC8A1	1
GO:0010882	BP	GO:0010882	regulation of cardiac muscle contraction by calcium ion signaling	2025-01-11	26/18903	0.0150301990660004	0.0539740920764139	0.0248833036768569	SLC8A1	1
GO:0030318	BP	GO:0030318	melanocyte differentiation	2025-01-11	26/18903	0.0150301990660004	0.0539740920764139	0.0248833036768569	BCL2	1
GO:0034643	BP	GO:0034643	establishment of mitochondrion localization, microtubule-mediated	2025-01-11	26/18903	0.0150301990660004	0.0539740920764139	0.0248833036768569	TRAK1	1
GO:0035994	BP	GO:0035994	response to muscle stretch	2025-01-11	26/18903	0.0150301990660004	0.0539740920764139	0.0248833036768569	SLC8A1	1
GO:0047497	BP	GO:0047497	mitochondrion transport along microtubule	2025-01-11	26/18903	0.0150301990660004	0.0539740920764139	0.0248833036768569	TRAK1	1
GO:0009895	BP	GO:0009895	negative regulation of catabolic process	2025-02-11	332/18903	0.0152332884311607	0.0539740920764139	0.0248833036768569	BCL2/DDIT4	2
GO:0018209	BP	GO:0018209	peptidyl-serine modification	2025-02-11	332/18903	0.0152332884311607	0.0539740920764139	0.0248833036768569	BCL2/DDIT4	2
GO:0060249	BP	GO:0060249	anatomical structure homeostasis	2025-02-11	333/18903	0.0153204693861099	0.0539740920764139	0.0248833036768569	BCL2/EPAS1	2
GO:0051604	BP	GO:0051604	protein maturation	2025-02-11	336/18903	0.0155833325871697	0.0539740920764139	0.0248833036768569	ACE/PLAUR	2
GO:0001783	BP	GO:0001783	B cell apoptotic process	2025-01-11	27/18903	0.0156041603845511	0.0539740920764139	0.0248833036768569	BCL2	1
GO:0014829	BP	GO:0014829	vascular associated smooth muscle contraction	2025-01-11	27/18903	0.0156041603845511	0.0539740920764139	0.0248833036768569	SLC8A1	1
GO:0031639	BP	GO:0031639	plasminogen activation	2025-01-11	27/18903	0.0156041603845511	0.0539740920764139	0.0248833036768569	PLAUR	1
GO:0031954	BP	GO:0031954	positive regulation of protein autophosphorylation	2025-01-11	27/18903	0.0156041603845511	0.0539740920764139	0.0248833036768569	ACE	1
GO:0036037	BP	GO:0036037	CD8-positive, alpha-beta T cell activation	2025-01-11	27/18903	0.0156041603845511	0.0539740920764139	0.0248833036768569	BCL2	1
GO:0042730	BP	GO:0042730	fibrinolysis	2025-01-11	27/18903	0.0156041603845511	0.0539740920764139	0.0248833036768569	PLAUR	1
GO:0045116	BP	GO:0045116	protein neddylation	2025-01-11	27/18903	0.0156041603845511	0.0539740920764139	0.0248833036768569	EPAS1	1
GO:0048641	BP	GO:0048641	regulation of skeletal muscle tissue development	2025-01-11	27/18903	0.0156041603845511	0.0539740920764139	0.0248833036768569	BCL2	1
GO:0071549	BP	GO:0071549	cellular response to dexamethasone stimulus	2025-01-11	27/18903	0.0156041603845511	0.0539740920764139	0.0248833036768569	DDIT4	1
GO:0090200	BP	GO:0090200	positive regulation of release of cytochrome c from mitochondria	2025-01-11	27/18903	0.0156041603845511	0.0539740920764139	0.0248833036768569	PLAUR	1
GO:0001933	BP	GO:0001933	negative regulation of protein phosphorylation	2025-02-11	338/18903	0.0157596726411565	0.0543093551611601	0.0250378677061614	SLC8A1/DDIT4	2
GO:0032104	BP	GO:0032104	regulation of response to extracellular stimulus	2025-01-11	28/18903	0.016177817633744	0.0551354299502968	0.0254187072728331	BCL2	1
GO:0032107	BP	GO:0032107	regulation of response to nutrient levels	2025-01-11	28/18903	0.016177817633744	0.0551354299502968	0.0254187072728331	BCL2	1
GO:1903779	BP	GO:1903779	regulation of cardiac conduction	2025-01-11	28/18903	0.016177817633744	0.0551354299502968	0.0254187072728331	SLC8A1	1
GO:0062197	BP	GO:0062197	cellular response to chemical stress	2025-02-11	345/18903	0.0163837500513071	0.0554296945166484	0.0255543700377667	BCL2/EPAS1	2
GO:0070588	BP	GO:0070588	calcium ion transmembrane transport	2025-02-11	345/18903	0.0163837500513071	0.0554296945166484	0.0255543700377667	BCL2/SLC8A1	2
GO:0070661	BP	GO:0070661	leukocyte proliferation	2025-02-11	348/18903	0.0166544773322999	0.0554583409949691	0.0255675767262334	BCL2/ACE	2
GO:0048873	BP	GO:0048873	homeostasis of number of cells within a tissue	2025-01-11	29/18903	0.0167511709585667	0.0554583409949691	0.0255675767262334	BCL2	1
GO:0051654	BP	GO:0051654	establishment of mitochondrion localization	2025-01-11	29/18903	0.0167511709585667	0.0554583409949691	0.0255675767262334	TRAK1	1
GO:0097066	BP	GO:0097066	response to thyroid hormone	2025-01-11	29/18903	0.0167511709585667	0.0554583409949691	0.0255675767262334	ACE	1
GO:0097254	BP	GO:0097254	renal tubular secretion	2025-01-11	29/18903	0.0167511709585667	0.0554583409949691	0.0255675767262334	ACE	1
GO:0097421	BP	GO:0097421	liver regeneration	2025-01-11	29/18903	0.0167511709585667	0.0554583409949691	0.0255675767262334	UCP2	1
GO:0002360	BP	GO:0002360	T cell lineage commitment	2025-01-11	30/18903	0.017324220503944	0.0567475350076187	0.026161924956672	BCL2	1
GO:0002474	BP	GO:0002474	antigen processing and presentation of peptide antigen via MHC class I	2025-01-11	30/18903	0.017324220503944	0.0567475350076187	0.026161924956672	ACE	1
GO:1902230	BP	GO:1902230	negative regulation of intrinsic apoptotic signaling pathway in response to DNA damage	2025-01-11	30/18903	0.017324220503944	0.0567475350076187	0.026161924956672	BCL2	1
GO:0072507	BP	GO:0072507	divalent inorganic cation homeostasis	2025-02-11	356/18903	0.0173859338346813	0.056749157270245	0.0261626728572298	BCL2/SLC8A1	2
GO:0001655	BP	GO:0001655	urogenital system development	2025-02-11	360/18903	0.0177568252304025	0.0570119857954086	0.0262838428807539	BCL2/ACE	2
GO:0010039	BP	GO:0010039	response to iron ion	2025-01-11	31/18903	0.0178969664147399	0.0570119857954086	0.0262838428807539	BCL2	1
GO:0010880	BP	GO:0010880	regulation of release of sequestered calcium ion into cytosol by sarcoplasmic reticulum	2025-01-11	31/18903	0.0178969664147399	0.0570119857954086	0.0262838428807539	SLC8A1	1
GO:0031069	BP	GO:0031069	hair follicle morphogenesis	2025-01-11	31/18903	0.0178969664147399	0.0570119857954086	0.0262838428807539	BCL2	1
GO:0033137	BP	GO:0033137	negative regulation of peptidyl-serine phosphorylation	2025-01-11	31/18903	0.0178969664147399	0.0570119857954086	0.0262838428807539	DDIT4	1
GO:0033688	BP	GO:0033688	regulation of osteoblast proliferation	2025-01-11	31/18903	0.0178969664147399	0.0570119857954086	0.0262838428807539	BCL2	1
GO:0040018	BP	GO:0040018	positive regulation of multicellular organism growth	2025-01-11	31/18903	0.0178969664147399	0.0570119857954086	0.0262838428807539	BCL2	1
GO:0010644	BP	GO:0010644	cell communication by electrical coupling	2025-01-11	32/18903	0.0184694088357578	0.057576218698301	0.0265439672872426	SLC8A1	1
GO:0033198	BP	GO:0033198	response to ATP	2025-01-11	32/18903	0.0184694088357578	0.057576218698301	0.0265439672872426	SLC8A1	1
GO:0050482	BP	GO:0050482	arachidonic acid secretion	2025-01-11	32/18903	0.0184694088357578	0.057576218698301	0.0265439672872426	ACE	1
GO:1901889	BP	GO:1901889	negative regulation of cell junction assembly	2025-01-11	32/18903	0.0184694088357578	0.057576218698301	0.0265439672872426	ACE	1
GO:1903963	BP	GO:1903963	arachidonate transport	2025-01-11	32/18903	0.0184694088357578	0.057576218698301	0.0265439672872426	ACE	1
GO:1990776	BP	GO:1990776	response to angiotensin	2025-01-11	32/18903	0.0184694088357578	0.057576218698301	0.0265439672872426	CYBB	1
GO:0070997	BP	GO:0070997	neuron death	2025-02-11	368/18903	0.0185088599483211	0.057576218698301	0.0265439672872426	BCL2/DDIT4	2
GO:0051098	BP	GO:0051098	regulation of binding	2025-02-11	372/18903	0.0188899736448474	0.0576183285143944	0.0265633808855324	ACE/PLAUR	2
GO:0001782	BP	GO:0001782	B cell homeostasis	2025-01-11	33/18903	0.019041547911737	0.0576183285143944	0.0265633808855324	BCL2	1
GO:0033032	BP	GO:0033032	regulation of myeloid cell apoptotic process	2025-01-11	33/18903	0.019041547911737	0.0576183285143944	0.0265633808855324	BCL2	1
GO:0043171	BP	GO:0043171	peptide catabolic process	2025-01-11	33/18903	0.019041547911737	0.0576183285143944	0.0265633808855324	ACE	1
GO:0045907	BP	GO:0045907	positive regulation of vasoconstriction	2025-01-11	33/18903	0.019041547911737	0.0576183285143944	0.0265633808855324	ACE	1
GO:0090279	BP	GO:0090279	regulation of calcium ion import	2025-01-11	33/18903	0.019041547911737	0.0576183285143944	0.0265633808855324	ACE	1
GO:0098801	BP	GO:0098801	regulation of renal system process	2025-01-11	33/18903	0.019041547911737	0.0576183285143944	0.0265633808855324	ACE	1
GO:1902253	BP	GO:1902253	regulation of intrinsic apoptotic signaling pathway by p53 class mediator	2025-01-11	33/18903	0.019041547911737	0.0576183285143944	0.0265633808855324	BCL2	1
GO:2001233	BP	GO:2001233	regulation of apoptotic signaling pathway	2025-02-11	374/18903	0.0190817981164176	0.0576183285143944	0.0265633808855324	BCL2/PLAUR	2
GO:0034405	BP	GO:0034405	response to fluid shear stress	2025-01-11	34/18903	0.0196133837873586	0.0584731802965977	0.0269574873109847	ACE	1
GO:1901797	BP	GO:1901797	negative regulation of signal transduction by p53 class mediator	2025-01-11	34/18903	0.0196133837873586	0.0584731802965977	0.0269574873109847	BCL2	1
GO:0042326	BP	GO:0042326	negative regulation of phosphorylation	2025-02-11	381/18903	0.0197598074022845	0.0584731802965977	0.0269574873109847	SLC8A1/DDIT4	2
GO:0001893	BP	GO:0001893	maternal placenta development	2025-01-11	35/18903	0.0201849166072398	0.0584731802965977	0.0269574873109847	BSG	1
GO:0002446	BP	GO:0002446	neutrophil mediated immunity	2025-01-11	35/18903	0.0201849166072398	0.0584731802965977	0.0269574873109847	ACE	1
GO:0014808	BP	GO:0014808	release of sequestered calcium ion into cytosol by sarcoplasmic reticulum	2025-01-11	35/18903	0.0201849166072398	0.0584731802965977	0.0269574873109847	SLC8A1	1
GO:0043276	BP	GO:0043276	anoikis	2025-01-11	35/18903	0.0201849166072398	0.0584731802965977	0.0269574873109847	BCL2	1
GO:0046676	BP	GO:0046676	negative regulation of insulin secretion	2025-01-11	35/18903	0.0201849166072398	0.0584731802965977	0.0269574873109847	UCP2	1
GO:0048730	BP	GO:0048730	epidermis morphogenesis	2025-01-11	35/18903	0.0201849166072398	0.0584731802965977	0.0269574873109847	BCL2	1
GO:0071425	BP	GO:0071425	hematopoietic stem cell proliferation	2025-01-11	35/18903	0.0201849166072398	0.0584731802965977	0.0269574873109847	ACE	1
GO:0090075	BP	GO:0090075	relaxation of muscle	2025-01-11	35/18903	0.0201849166072398	0.0584731802965977	0.0269574873109847	SLC8A1	1
GO:1901099	BP	GO:1901099	negative regulation of signal transduction in absence of ligand	2025-01-11	35/18903	0.0201849166072398	0.0584731802965977	0.0269574873109847	BCL2	1
GO:2001240	BP	GO:2001240	negative regulation of extrinsic apoptotic signaling pathway in absence of ligand	2025-01-11	35/18903	0.0201849166072398	0.0584731802965977	0.0269574873109847	BCL2	1
GO:0016486	BP	GO:0016486	peptide hormone processing	2025-01-11	36/18903	0.0207561465159376	0.0588398728598764	0.0271265410561628	ACE	1
GO:0033687	BP	GO:0033687	osteoblast proliferation	2025-01-11	36/18903	0.0207561465159376	0.0588398728598764	0.0271265410561628	BCL2	1
GO:0045777	BP	GO:0045777	positive regulation of blood pressure	2025-01-11	36/18903	0.0207561465159376	0.0588398728598764	0.0271265410561628	ACE	1
GO:0048536	BP	GO:0048536	spleen development	2025-01-11	36/18903	0.0207561465159376	0.0588398728598764	0.0271265410561628	BCL2	1
GO:0086010	BP	GO:0086010	membrane depolarization during action potential	2025-01-11	36/18903	0.0207561465159376	0.0588398728598764	0.0271265410561628	SLC8A1	1
GO:1903514	BP	GO:1903514	release of sequestered calcium ion into cytosol by endoplasmic reticulum	2025-01-11	36/18903	0.0207561465159376	0.0588398728598764	0.0271265410561628	SLC8A1	1
GO:1904062	BP	GO:1904062	regulation of cation transmembrane transport	2025-02-11	394/18903	0.0210460848866552	0.0588398728598764	0.0271265410561628	BCL2/SLC8A1	2
GO:0009100	BP	GO:0009100	glycoprotein metabolic process	2025-02-11	395/18903	0.0211464783004923	0.0588398728598764	0.0271265410561628	BCL2/TRAK1	2
GO:0001662	BP	GO:0001662	behavioral fear response	2025-01-11	37/18903	0.0213270736579487	0.0588398728598764	0.0271265410561628	BCL2	1
GO:0007588	BP	GO:0007588	excretion	2025-01-11	37/18903	0.0213270736579487	0.0588398728598764	0.0271265410561628	ACE	1
GO:0034110	BP	GO:0034110	regulation of homotypic cell-cell adhesion	2025-01-11	37/18903	0.0213270736579487	0.0588398728598764	0.0271265410561628	PLAUR	1
GO:0038179	BP	GO:0038179	neurotrophin signaling pathway	2025-01-11	37/18903	0.0213270736579487	0.0588398728598764	0.0271265410561628	DDIT4	1
GO:0050931	BP	GO:0050931	pigment cell differentiation	2025-01-11	37/18903	0.0213270736579487	0.0588398728598764	0.0271265410561628	BCL2	1
GO:0070229	BP	GO:0070229	negative regulation of lymphocyte apoptotic process	2025-01-11	37/18903	0.0213270736579487	0.0588398728598764	0.0271265410561628	BCL2	1
GO:0071276	BP	GO:0071276	cellular response to cadmium ion	2025-01-11	37/18903	0.0213270736579487	0.0588398728598764	0.0271265410561628	CYBB	1
GO:0071312	BP	GO:0071312	cellular response to alkaloid	2025-01-11	37/18903	0.0213270736579487	0.0588398728598764	0.0271265410561628	SLC8A1	1
GO:0002209	BP	GO:0002209	behavioral defense response	2025-01-11	38/18903	0.0218976981777071	0.0593542871658904	0.0273636979382859	BCL2	1
GO:0043368	BP	GO:0043368	positive T cell selection	2025-01-11	38/18903	0.0218976981777071	0.0593542871658904	0.0273636979382859	BCL2	1
GO:0045742	BP	GO:0045742	positive regulation of epidermal growth factor receptor signaling pathway	2025-01-11	38/18903	0.0218976981777071	0.0593542871658904	0.0273636979382859	PLAUR	1
GO:0048741	BP	GO:0048741	skeletal muscle fiber development	2025-01-11	38/18903	0.0218976981777071	0.0593542871658904	0.0273636979382859	BCL2	1
GO:0140448	BP	GO:0140448	signaling receptor ligand precursor processing	2025-01-11	38/18903	0.0218976981777071	0.0593542871658904	0.0273636979382859	ACE	1
GO:1902229	BP	GO:1902229	regulation of intrinsic apoptotic signaling pathway in response to DNA damage	2025-01-11	38/18903	0.0218976981777071	0.0593542871658904	0.0273636979382859	BCL2	1
GO:0001990	BP	GO:0001990	regulation of systemic arterial blood pressure by hormone	2025-01-11	39/18903	0.0224680202195862	0.0597875239404827	0.0275634301025788	ACE	1
GO:0030279	BP	GO:0030279	negative regulation of ossification	2025-01-11	39/18903	0.0224680202195862	0.0597875239404827	0.0275634301025788	BCL2	1
GO:0033028	BP	GO:0033028	myeloid cell apoptotic process	2025-01-11	39/18903	0.0224680202195862	0.0597875239404827	0.0275634301025788	BCL2	1
GO:0042755	BP	GO:0042755	eating behavior	2025-01-11	39/18903	0.0224680202195862	0.0597875239404827	0.0275634301025788	ACE	1
GO:0043618	BP	GO:0043618	regulation of transcription from RNA polymerase II promoter in response to stress	2025-01-11	39/18903	0.0224680202195862	0.0597875239404827	0.0275634301025788	EPAS1	1
GO:0045730	BP	GO:0045730	respiratory burst	2025-01-11	39/18903	0.0224680202195862	0.0597875239404827	0.0275634301025788	CYBB	1
GO:0009615	BP	GO:0009615	response to virus	2025-02-11	409/18903	0.022573498790905	0.0597875239404827	0.0275634301025788	BCL2/DDIT4	2
GO:0042692	BP	GO:0042692	muscle cell differentiation	2025-02-11	409/18903	0.022573498790905	0.0597875239404827	0.0275634301025788	BCL2/SLC8A1	2
GO:0010762	BP	GO:0010762	regulation of fibroblast migration	2025-01-11	40/18903	0.0230380399278977	0.0603284265908507	0.0278127987235398	SLC8A1	1
GO:0048753	BP	GO:0048753	pigment granule organization	2025-01-11	40/18903	0.0230380399278977	0.0603284265908507	0.0278127987235398	BCL2	1
GO:0090278	BP	GO:0090278	negative regulation of peptide hormone secretion	2025-01-11	40/18903	0.0230380399278977	0.0603284265908507	0.0278127987235398	UCP2	1
GO:1901186	BP	GO:1901186	positive regulation of ERBB signaling pathway	2025-01-11	40/18903	0.0230380399278977	0.0603284265908507	0.0278127987235398	PLAUR	1
GO:0002792	BP	GO:0002792	negative regulation of peptide secretion	2025-01-11	41/18903	0.0236077574468921	0.0613008155553754	0.0282610925060835	UCP2	1
GO:0070232	BP	GO:0070232	regulation of T cell apoptotic process	2025-01-11	41/18903	0.0236077574468921	0.0613008155553754	0.0282610925060835	BCL2	1
GO:0098703	BP	GO:0098703	calcium ion import across plasma membrane	2025-01-11	41/18903	0.0236077574468921	0.0613008155553754	0.0282610925060835	SLC8A1	1
GO:0006875	BP	GO:0006875	cellular metal ion homeostasis	2025-02-11	420/18903	0.0237226321635804	0.0614270391498298	0.0283192844998931	BCL2/SLC8A1	2
GO:0016032	BP	GO:0016032	viral process	2025-02-11	421/18903	0.0238283047599273	0.0615287980848262	0.028366197720365	BCL2/BSG	2
GO:0060537	BP	GO:0060537	muscle tissue development	2025-02-11	422/18903	0.0239341773768164	0.0616305067453022	0.0284130877631212	BCL2/SLC8A1	2
GO:0014904	BP	GO:0014904	myotube cell development	2025-01-11	42/18903	0.0241771729207588	0.0617417060538387	0.0284643532139425	BCL2	1
GO:0043029	BP	GO:0043029	T cell homeostasis	2025-01-11	42/18903	0.0241771729207588	0.0617417060538387	0.0284643532139425	BCL2	1
GO:0070296	BP	GO:0070296	sarcoplasmic reticulum calcium ion transport	2025-01-11	42/18903	0.0241771729207588	0.0617417060538387	0.0284643532139425	SLC8A1	1
GO:0001503	BP	GO:0001503	ossification	2025-02-11	429/18903	0.0246808675858694	0.0622731276462192	0.0287093508480838	BCL2/SLC8A1	2
GO:0031952	BP	GO:0031952	regulation of protein autophosphorylation	2025-01-11	43/18903	0.0247462864936278	0.0622731276462192	0.0287093508480838	ACE	1
GO:0042554	BP	GO:0042554	superoxide anion generation	2025-01-11	43/18903	0.0247462864936278	0.0622731276462192	0.0287093508480838	CYBB	1
GO:0042596	BP	GO:0042596	fear response	2025-01-11	43/18903	0.0247462864936278	0.0622731276462192	0.0287093508480838	BCL2	1
GO:0042789	BP	GO:0042789	mRNA transcription by RNA polymerase II	2025-01-11	43/18903	0.0247462864936278	0.0622731276462192	0.0287093508480838	EPAS1	1
GO:0034329	BP	GO:0034329	cell junction assembly	2025-02-11	430/18903	0.024788332364029	0.0622731276462192	0.0287093508480838	BCL2/ACE	2
GO:0014911	BP	GO:0014911	positive regulation of smooth muscle cell migration	2025-01-11	44/18903	0.0253150983095647	0.0630541171827918	0.0290694050714966	BCL2	1
GO:0007409	BP	GO:0007409	axonogenesis	2025-02-11	438/18903	0.0256551608115871	0.0630541171827918	0.0290694050714966	BCL2/BSG	2
GO:0045936	BP	GO:0045936	negative regulation of phosphate metabolic process	2025-02-11	440/18903	0.0258738348912645	0.0630541171827918	0.0290694050714966	SLC8A1/DDIT4	2
GO:0003254	BP	GO:0003254	regulation of membrane depolarization	2025-01-11	45/18903	0.0258836085125763	0.0630541171827918	0.0290694050714966	BCL2	1
GO:0008631	BP	GO:0008631	intrinsic apoptotic signaling pathway in response to oxidative stress	2025-01-11	45/18903	0.0258836085125763	0.0630541171827918	0.0290694050714966	BCL2	1
GO:0010799	BP	GO:0010799	regulation of peptidyl-threonine phosphorylation	2025-01-11	45/18903	0.0258836085125763	0.0630541171827918	0.0290694050714966	DDIT4	1
GO:0030501	BP	GO:0030501	positive regulation of bone mineralization	2025-01-11	45/18903	0.0258836085125763	0.0630541171827918	0.0290694050714966	SLC8A1	1
GO:0030890	BP	GO:0030890	positive regulation of B cell proliferation	2025-01-11	45/18903	0.0258836085125763	0.0630541171827918	0.0290694050714966	BCL2	1
GO:0042551	BP	GO:0042551	neuron maturation	2025-01-11	45/18903	0.0258836085125763	0.0630541171827918	0.0290694050714966	BCL2	1
GO:0043620	BP	GO:0043620	regulation of DNA-templated transcription in response to stress	2025-01-11	45/18903	0.0258836085125763	0.0630541171827918	0.0290694050714966	EPAS1	1
GO:0047496	BP	GO:0047496	vesicle transport along microtubule	2025-01-11	45/18903	0.0258836085125763	0.0630541171827918	0.0290694050714966	TRAK1	1
GO:0010563	BP	GO:0010563	negative regulation of phosphorus metabolic process	2025-02-11	441/18903	0.0259834657646456	0.0630541171827918	0.0290694050714966	SLC8A1/DDIT4	2
GO:0048732	BP	GO:0048732	gland development	2025-02-11	441/18903	0.0259834657646456	0.0630541171827918	0.0290694050714966	BCL2/UCP2	2
GO:0010677	BP	GO:0010677	negative regulation of cellular carbohydrate metabolic process	2025-01-11	46/18903	0.0264518172466072	0.0635254782062302	0.02928671339548	DDIT4	1
GO:0010830	BP	GO:0010830	regulation of myotube differentiation	2025-01-11	46/18903	0.0264518172466072	0.0635254782062302	0.02928671339548	BCL2	1
GO:1901861	BP	GO:1901861	regulation of muscle tissue development	2025-01-11	46/18903	0.0264518172466072	0.0635254782062302	0.02928671339548	BCL2	1
GO:2001239	BP	GO:2001239	regulation of extrinsic apoptotic signaling pathway in absence of ligand	2025-01-11	46/18903	0.0264518172466072	0.0635254782062302	0.02928671339548	BCL2	1
GO:0006110	BP	GO:0006110	regulation of glycolytic process	2025-01-11	47/18903	0.0270197246555425	0.0643889068269611	0.0296847739416865	DDIT4	1
GO:0048286	BP	GO:0048286	lung alveolus development	2025-01-11	47/18903	0.0270197246555425	0.0643889068269611	0.0296847739416865	ACE	1
GO:0090199	BP	GO:0090199	regulation of release of cytochrome c from mitochondria	2025-01-11	47/18903	0.0270197246555425	0.0643889068269611	0.0296847739416865	PLAUR	1
GO:0008038	BP	GO:0008038	neuron recognition	2025-01-11	48/18903	0.0275873308832042	0.0649072480424627	0.0299237412198261	BSG	1
GO:0009299	BP	GO:0009299	mRNA transcription	2025-01-11	48/18903	0.0275873308832042	0.0649072480424627	0.0299237412198261	EPAS1	1
GO:0032309	BP	GO:0032309	icosanoid secretion	2025-01-11	48/18903	0.0275873308832042	0.0649072480424627	0.0299237412198261	ACE	1
GO:0048538	BP	GO:0048538	thymus development	2025-01-11	48/18903	0.0275873308832042	0.0649072480424627	0.0299237412198261	BCL2	1
GO:0060976	BP	GO:0060976	coronary vasculature development	2025-01-11	48/18903	0.0275873308832042	0.0649072480424627	0.0299237412198261	ACE	1
GO:0003044	BP	GO:0003044	regulation of systemic arterial blood pressure mediated by a chemical signal	2025-01-11	49/18903	0.0281546360733548	0.0649237503482584	0.0299313491641321	ACE	1
GO:0008089	BP	GO:0008089	anterograde axonal transport	2025-01-11	49/18903	0.0281546360733548	0.0649237503482584	0.0299313491641321	TRAK1	1
GO:0034198	BP	GO:0034198	cellular response to amino acid starvation	2025-01-11	49/18903	0.0281546360733548	0.0649237503482584	0.0299313491641321	UCP2	1
GO:0035094	BP	GO:0035094	response to nicotine	2025-01-11	49/18903	0.0281546360733548	0.0649237503482584	0.0299313491641321	BCL2	1
GO:0048066	BP	GO:0048066	developmental pigmentation	2025-01-11	49/18903	0.0281546360733548	0.0649237503482584	0.0299313491641321	BCL2	1
GO:0048546	BP	GO:0048546	digestive tract morphogenesis	2025-01-11	49/18903	0.0281546360733548	0.0649237503482584	0.0299313491641321	BCL2	1
GO:0061178	BP	GO:0061178	regulation of insulin secretion involved in cellular response to glucose stimulus	2025-01-11	49/18903	0.0281546360733548	0.0649237503482584	0.0299313491641321	UCP2	1
GO:2000378	BP	GO:2000378	negative regulation of reactive oxygen species metabolic process	2025-01-11	49/18903	0.0281546360733548	0.0649237503482584	0.0299313491641321	BCL2	1
GO:0018198	BP	GO:0018198	peptidyl-cysteine modification	2025-01-11	50/18903	0.0287216403696945	0.0657406435128563	0.0303079557897231	ACE	1
GO:0030195	BP	GO:0030195	negative regulation of blood coagulation	2025-01-11	50/18903	0.0287216403696945	0.0657406435128563	0.0303079557897231	PLAUR	1
GO:0051646	BP	GO:0051646	mitochondrion localization	2025-01-11	50/18903	0.0287216403696945	0.0657406435128563	0.0303079557897231	TRAK1	1
GO:0045058	BP	GO:0045058	T cell selection	2025-01-11	51/18903	0.0292883439158638	0.0665448402206022	0.0306787090553165	BCL2	1
GO:1900047	BP	GO:1900047	negative regulation of hemostasis	2025-01-11	51/18903	0.0292883439158638	0.0665448402206022	0.0306787090553165	PLAUR	1
GO:1990928	BP	GO:1990928	response to amino acid starvation	2025-01-11	51/18903	0.0292883439158638	0.0665448402206022	0.0306787090553165	UCP2	1
GO:0032007	BP	GO:0032007	negative regulation of TOR signaling	2025-01-11	52/18903	0.0298547468554423	0.0671731804247452	0.0309683884090689	DDIT4	1
GO:0045912	BP	GO:0045912	negative regulation of carbohydrate metabolic process	2025-01-11	52/18903	0.0298547468554423	0.0671731804247452	0.0309683884090689	DDIT4	1
GO:0051452	BP	GO:0051452	intracellular pH reduction	2025-01-11	52/18903	0.0298547468554423	0.0671731804247452	0.0309683884090689	BCL2	1
GO:0051480	BP	GO:0051480	regulation of cytosolic calcium ion concentration	2025-01-11	52/18903	0.0298547468554423	0.0671731804247452	0.0309683884090689	SLC8A1	1
GO:0051155	BP	GO:0051155	positive regulation of striated muscle cell differentiation	2025-01-11	53/18903	0.0304208493319462	0.0682811799775161	0.0314792018064742	BCL2	1
GO:0042149	BP	GO:0042149	cellular response to glucose starvation	2025-01-11	54/18903	0.0309866514888351	0.0685821787918482	0.0316179692153414	BCL2	1
GO:0045778	BP	GO:0045778	positive regulation of ossification	2025-01-11	54/18903	0.0309866514888351	0.0685821787918482	0.0316179692153414	SLC8A1	1
GO:0050819	BP	GO:0050819	negative regulation of coagulation	2025-01-11	54/18903	0.0309866514888351	0.0685821787918482	0.0316179692153414	PLAUR	1
GO:0002931	BP	GO:0002931	response to ischemia	2025-01-11	55/18903	0.0315521534695036	0.0685821787918482	0.0316179692153414	BCL2	1
GO:0006584	BP	GO:0006584	catecholamine metabolic process	2025-01-11	55/18903	0.0315521534695036	0.0685821787918482	0.0316179692153414	EPAS1	1
GO:0009712	BP	GO:0009712	catechol-containing compound metabolic process	2025-01-11	55/18903	0.0315521534695036	0.0685821787918482	0.0316179692153414	EPAS1	1
GO:0010761	BP	GO:0010761	fibroblast migration	2025-01-11	55/18903	0.0315521534695036	0.0685821787918482	0.0316179692153414	SLC8A1	1
GO:0031103	BP	GO:0031103	axon regeneration	2025-01-11	55/18903	0.0315521534695036	0.0685821787918482	0.0316179692153414	BCL2	1
GO:0042743	BP	GO:0042743	hydrogen peroxide metabolic process	2025-01-11	55/18903	0.0315521534695036	0.0685821787918482	0.0316179692153414	CYBB	1
GO:0070169	BP	GO:0070169	positive regulation of biomineral tissue development	2025-01-11	55/18903	0.0315521534695036	0.0685821787918482	0.0316179692153414	SLC8A1	1
GO:0071320	BP	GO:0071320	cellular response to cAMP	2025-01-11	55/18903	0.0315521534695036	0.0685821787918482	0.0316179692153414	SLC8A1	1
GO:0071385	BP	GO:0071385	cellular response to glucocorticoid stimulus	2025-01-11	55/18903	0.0315521534695036	0.0685821787918482	0.0316179692153414	DDIT4	1
GO:2000107	BP	GO:2000107	negative regulation of leukocyte apoptotic process	2025-01-11	55/18903	0.0315521534695036	0.0685821787918482	0.0316179692153414	BCL2	1
GO:0061564	BP	GO:0061564	axon development	2025-02-11	490/18903	0.0315907123453281	0.0685821787918482	0.0316179692153414	BCL2/BSG	2
GO:0010559	BP	GO:0010559	regulation of glycoprotein biosynthetic process	2025-01-11	56/18903	0.0321173554172882	0.068918491832931	0.0317730172987793	BCL2	1
GO:0043470	BP	GO:0043470	regulation of carbohydrate catabolic process	2025-01-11	56/18903	0.0321173554172882	0.068918491832931	0.0317730172987793	DDIT4	1
GO:0071715	BP	GO:0071715	icosanoid transport	2025-01-11	56/18903	0.0321173554172882	0.068918491832931	0.0317730172987793	ACE	1
GO:0110151	BP	GO:0110151	positive regulation of biomineralization	2025-01-11	56/18903	0.0321173554172882	0.068918491832931	0.0317730172987793	SLC8A1	1
GO:1903170	BP	GO:1903170	negative regulation of calcium ion transmembrane transport	2025-01-11	56/18903	0.0321173554172882	0.068918491832931	0.0317730172987793	BCL2	1
GO:0030003	BP	GO:0030003	cellular cation homeostasis	2025-02-11	499/18903	0.0326696474995984	0.0694872767884255	0.0320352403067061	BCL2/SLC8A1	2
GO:0010332	BP	GO:0010332	response to gamma radiation	2025-01-11	57/18903	0.0326822574754623	0.0694872767884255	0.0320352403067061	BCL2	1
GO:0043388	BP	GO:0043388	positive regulation of DNA binding	2025-01-11	57/18903	0.0326822574754623	0.0694872767884255	0.0320352403067061	PLAUR	1
GO:0070231	BP	GO:0070231	T cell apoptotic process	2025-01-11	57/18903	0.0326822574754623	0.0694872767884255	0.0320352403067061	BCL2	1
GO:0001541	BP	GO:0001541	ovarian follicle development	2025-01-11	58/18903	0.0332468597872402	0.0703649292757343	0.0324398583840892	BCL2	1
GO:0048599	BP	GO:0048599	oocyte development	2025-01-11	58/18903	0.0332468597872402	0.0703649292757343	0.0324398583840892	BCL2	1
GO:0007566	BP	GO:0007566	embryo implantation	2025-01-11	59/18903	0.0338111624957751	0.070911646229827	0.0326919075334239	BSG	1
GO:0035773	BP	GO:0035773	insulin secretion involved in cellular response to glucose stimulus	2025-01-11	59/18903	0.0338111624957751	0.070911646229827	0.0326919075334239	UCP2	1
GO:0046324	BP	GO:0046324	regulation of glucose import	2025-01-11	59/18903	0.0338111624957751	0.070911646229827	0.0326919075334239	ACE	1
GO:0061098	BP	GO:0061098	positive regulation of protein tyrosine kinase activity	2025-01-11	59/18903	0.0338111624957751	0.070911646229827	0.0326919075334239	ACE	1
GO:0001658	BP	GO:0001658	branching involved in ureteric bud morphogenesis	2025-01-11	60/18903	0.0343751657441589	0.0716084913367085	0.0330131692303454	BCL2	1
GO:0019748	BP	GO:0019748	secondary metabolic process	2025-01-11	60/18903	0.0343751657441589	0.0716084913367085	0.0330131692303454	BCL2	1
GO:0046686	BP	GO:0046686	response to cadmium ion	2025-01-11	60/18903	0.0343751657441589	0.0716084913367085	0.0330131692303454	CYBB	1
GO:0060135	BP	GO:0060135	maternal process involved in female pregnancy	2025-01-11	61/18903	0.0349388696754238	0.0723310074702497	0.0333462658637613	BSG	1
GO:0086065	BP	GO:0086065	cell communication involved in cardiac conduction	2025-01-11	61/18903	0.0349388696754238	0.0723310074702497	0.0333462658637613	SLC8A1	1
GO:0009994	BP	GO:0009994	oocyte differentiation	2025-01-11	62/18903	0.0355022744325389	0.0723310074702497	0.0333462658637613	BCL2	1
GO:0031102	BP	GO:0031102	neuron projection regeneration	2025-01-11	62/18903	0.0355022744325389	0.0723310074702497	0.0333462658637613	BCL2	1
GO:0046888	BP	GO:0046888	negative regulation of hormone secretion	2025-01-11	62/18903	0.0355022744325389	0.0723310074702497	0.0333462658637613	UCP2	1
GO:0046902	BP	GO:0046902	regulation of mitochondrial membrane permeability	2025-01-11	62/18903	0.0355022744325389	0.0723310074702497	0.0333462658637613	BCL2	1
GO:0070228	BP	GO:0070228	regulation of lymphocyte apoptotic process	2025-01-11	62/18903	0.0355022744325389	0.0723310074702497	0.0333462658637613	BCL2	1
GO:1903018	BP	GO:1903018	regulation of glycoprotein metabolic process	2025-01-11	62/18903	0.0355022744325389	0.0723310074702497	0.0333462658637613	BCL2	1
GO:1903409	BP	GO:1903409	reactive oxygen species biosynthetic process	2025-01-11	62/18903	0.0355022744325389	0.0723310074702497	0.0333462658637613	CYBB	1
GO:1904036	BP	GO:1904036	negative regulation of epithelial cell apoptotic process	2025-01-11	62/18903	0.0355022744325389	0.0723310074702497	0.0333462658637613	BCL2	1
GO:0070059	BP	GO:0070059	intrinsic apoptotic signaling pathway in response to endoplasmic reticulum stress	2025-01-11	63/18903	0.0360653801584154	0.0731566901681643	0.0337269246673193	BCL2	1
GO:0070542	BP	GO:0070542	response to fatty acid	2025-01-11	63/18903	0.0360653801584154	0.0731566901681643	0.0337269246673193	UCP2	1
GO:0019229	BP	GO:0019229	regulation of vasoconstriction	2025-01-11	64/18903	0.0366281869959025	0.07365364283124	0.0339560313285453	ACE	1
GO:0033059	BP	GO:0033059	cellular pigmentation	2025-01-11	64/18903	0.0366281869959025	0.07365364283124	0.0339560313285453	BCL2	1
GO:0048002	BP	GO:0048002	antigen processing and presentation of peptide antigen	2025-01-11	64/18903	0.0366281869959025	0.07365364283124	0.0339560313285453	ACE	1
GO:0098930	BP	GO:0098930	axonal transport	2025-01-11	64/18903	0.0366281869959025	0.07365364283124	0.0339560313285453	TRAK1	1
GO:0040014	BP	GO:0040014	regulation of multicellular organism growth	2025-01-11	65/18903	0.0371906950877888	0.0743012378154747	0.0342545875808581	BCL2	1
GO:0048857	BP	GO:0048857	neural nucleus development	2025-01-11	65/18903	0.0371906950877888	0.0743012378154747	0.0342545875808581	BCL2	1
GO:0050435	BP	GO:0050435	amyloid-beta metabolic process	2025-01-11	65/18903	0.0371906950877888	0.0743012378154747	0.0342545875808581	ACE	1
GO:0060675	BP	GO:0060675	ureteric bud morphogenesis	2025-01-11	66/18903	0.0377529045768022	0.0752622420273026	0.0346976327293304	BCL2	1
GO:0015909	BP	GO:0015909	long-chain fatty acid transport	2025-01-11	67/18903	0.0383148156056101	0.0755698597157459	0.0348394515921113	ACE	1
GO:0030888	BP	GO:0030888	regulation of B cell proliferation	2025-01-11	67/18903	0.0383148156056101	0.0755698597157459	0.0348394515921113	BCL2	1
GO:0031638	BP	GO:0031638	zymogen activation	2025-01-11	67/18903	0.0383148156056101	0.0755698597157459	0.0348394515921113	PLAUR	1
GO:0070613	BP	GO:0070613	regulation of protein processing	2025-01-11	67/18903	0.0383148156056101	0.0755698597157459	0.0348394515921113	PLAUR	1
GO:0072171	BP	GO:0072171	mesonephric tubule morphogenesis	2025-01-11	67/18903	0.0383148156056101	0.0755698597157459	0.0348394515921113	BCL2	1
GO:0038034	BP	GO:0038034	signal transduction in absence of ligand	2025-01-11	68/18903	0.0388764283168197	0.07635264629172	0.0352003342922141	BCL2	1
GO:0097192	BP	GO:0097192	extrinsic apoptotic signaling pathway in absence of ligand	2025-01-11	68/18903	0.0388764283168197	0.07635264629172	0.0352003342922141	BCL2	1
GO:0002260	BP	GO:0002260	lymphocyte homeostasis	2025-01-11	69/18903	0.0394377428529764	0.0771282439339855	0.0355579027277558	BCL2	1
GO:0032835	BP	GO:0032835	glomerulus development	2025-01-11	69/18903	0.0394377428529764	0.0771282439339855	0.0355579027277558	BCL2	1
GO:0014823	BP	GO:0014823	response to activity	2025-01-11	70/18903	0.0399987593565665	0.0778967435368427	0.0359121988031092	UCP3	1
GO:0030193	BP	GO:0030193	regulation of blood coagulation	2025-01-11	70/18903	0.0399987593565665	0.0778967435368427	0.0359121988031092	PLAUR	1
GO:0099518	BP	GO:0099518	vesicle cytoskeletal trafficking	2025-01-11	71/18903	0.0405594779700154	0.078823136432294	0.036339287334936	TRAK1	1
GO:0050709	BP	GO:0050709	negative regulation of protein secretion	2025-01-11	72/18903	0.0411198988356873	0.0794128046264212	0.0366111379984409	UCP2	1
GO:1900046	BP	GO:1900046	regulation of hemostasis	2025-01-11	72/18903	0.0411198988356873	0.0794128046264212	0.0366111379984409	PLAUR	1
GO:1903317	BP	GO:1903317	regulation of protein maturation	2025-01-11	72/18903	0.0411198988356873	0.0794128046264212	0.0366111379984409	PLAUR	1
GO:0008333	BP	GO:0008333	endosome to lysosome transport	2025-01-11	73/18903	0.0416800220958859	0.0801605404209259	0.0369558614783352	TRAK1	1
GO:1903578	BP	GO:1903578	regulation of ATP metabolic process	2025-01-11	73/18903	0.0416800220958859	0.0801605404209259	0.0369558614783352	DDIT4	1
GO:0006801	BP	GO:0006801	superoxide metabolic process	2025-01-11	74/18903	0.0422398478928561	0.0807347195807785	0.03722057133912	CYBB	1
GO:0007585	BP	GO:0007585	respiratory gaseous exchange by respiratory system	2025-01-11	74/18903	0.0422398478928561	0.0807347195807785	0.03722057133912	UCP3	1
GO:0042058	BP	GO:0042058	regulation of epidermal growth factor receptor signaling pathway	2025-01-11	74/18903	0.0422398478928561	0.0807347195807785	0.03722057133912	PLAUR	1
GO:0046323	BP	GO:0046323	glucose import	2025-01-11	75/18903	0.0427993763687804	0.0813012743726628	0.0374817661900881	ACE	1
GO:0050818	BP	GO:0050818	regulation of coagulation	2025-01-11	75/18903	0.0427993763687804	0.0813012743726628	0.0374817661900881	PLAUR	1
GO:0072078	BP	GO:0072078	nephron tubule morphogenesis	2025-01-11	75/18903	0.0427993763687804	0.0813012743726628	0.0374817661900881	BCL2	1
GO:0010822	BP	GO:0010822	positive regulation of mitochondrion organization	2025-01-11	76/18903	0.043358607665782	0.0821951519553782	0.037893864411382	PLAUR	1
GO:0008088	BP	GO:0008088	axo-dendritic transport	2025-01-11	77/18903	0.0439175419259231	0.0825792319783585	0.0380709341772708	TRAK1	1
GO:0010827	BP	GO:0010827	regulation of glucose transmembrane transport	2025-01-11	77/18903	0.0439175419259231	0.0825792319783585	0.0380709341772708	ACE	1
GO:0072088	BP	GO:0072088	nephron epithelium morphogenesis	2025-01-11	77/18903	0.0439175419259231	0.0825792319783585	0.0380709341772708	BCL2	1
GO:0090559	BP	GO:0090559	regulation of membrane permeability	2025-01-11	77/18903	0.0439175419259231	0.0825792319783585	0.0380709341772708	BCL2	1
GO:0043154	BP	GO:0043154	negative regulation of cysteine-type endopeptidase activity involved in apoptotic process	2025-01-11	78/18903	0.0444761792912056	0.0829565758610616	0.0382448984268336	PLAUR	1
GO:0055117	BP	GO:0055117	regulation of cardiac muscle contraction	2025-01-11	78/18903	0.0444761792912056	0.0829565758610616	0.0382448984268336	SLC8A1	1
GO:0061045	BP	GO:0061045	negative regulation of wound healing	2025-01-11	78/18903	0.0444761792912056	0.0829565758610616	0.0382448984268336	PLAUR	1
GO:0140115	BP	GO:0140115	export across plasma membrane	2025-01-11	78/18903	0.0444761792912056	0.0829565758610616	0.0382448984268336	SLC8A1	1
GO:0061333	BP	GO:0061333	renal tubule morphogenesis	2025-01-11	79/18903	0.0450345199035721	0.0836613225463153	0.0385698029339738	BCL2	1
GO:0086001	BP	GO:0086001	cardiac muscle cell action potential	2025-01-11	79/18903	0.0450345199035721	0.0836613225463153	0.0385698029339738	SLC8A1	1
GO:0042440	BP	GO:0042440	pigment metabolic process	2025-01-11	80/18903	0.0455925639049037	0.0838577514679479	0.0386603612059125	BCL2	1
GO:0070227	BP	GO:0070227	lymphocyte apoptotic process	2025-01-11	80/18903	0.0455925639049037	0.0838577514679479	0.0386603612059125	BCL2	1
GO:0071230	BP	GO:0071230	cellular response to amino acid stimulus	2025-01-11	80/18903	0.0455925639049037	0.0838577514679479	0.0386603612059125	CYBB	1
GO:0072028	BP	GO:0072028	nephron morphogenesis	2025-01-11	80/18903	0.0455925639049037	0.0838577514679479	0.0386603612059125	BCL2	1
GO:1901184	BP	GO:1901184	regulation of ERBB signaling pathway	2025-01-11	80/18903	0.0455925639049037	0.0838577514679479	0.0386603612059125	PLAUR	1
GO:0033555	BP	GO:0033555	multicellular organismal response to stress	2025-01-11	81/18903	0.0461503114370205	0.0847155221824119	0.0390558133265875	BCL2	1
GO:0051149	BP	GO:0051149	positive regulation of muscle cell differentiation	2025-01-11	82/18903	0.046707762641685	0.0852324723796102	0.0392941393131457	BCL2	1
GO:0051279	BP	GO:0051279	regulation of release of sequestered calcium ion into cytosol	2025-01-11	82/18903	0.046707762641685	0.0852324723796102	0.0392941393131457	SLC8A1	1
GO:2001021	BP	GO:2001021	negative regulation of response to DNA damage stimulus	2025-01-11	82/18903	0.046707762641685	0.0852324723796102	0.0392941393131457	BCL2	1
GO:0006096	BP	GO:0006096	glycolytic process	2025-01-11	83/18903	0.0472649176605971	0.0857428154038622	0.0395294192402975	DDIT4	1
GO:0030500	BP	GO:0030500	regulation of bone mineralization	2025-01-11	83/18903	0.0472649176605971	0.0857428154038622	0.0395294192402975	SLC8A1	1
GO:0055013	BP	GO:0055013	cardiac muscle cell development	2025-01-11	83/18903	0.0472649176605971	0.0857428154038622	0.0395294192402975	SLC8A1	1
GO:0006757	BP	GO:0006757	ATP generation from ADP	2025-01-11	84/18903	0.0478217766353966	0.0865835682441652	0.0399170257277364	DDIT4	1
GO:0008625	BP	GO:0008625	extrinsic apoptotic signaling pathway via death domain receptors	2025-01-11	85/18903	0.048378339707665	0.0870810114737971	0.0401463585514808	BCL2	1
GO:0048041	BP	GO:0048041	focal adhesion assembly	2025-01-11	85/18903	0.048378339707665	0.0870810114737971	0.0401463585514808	BCL2	1
GO:0051453	BP	GO:0051453	regulation of intracellular pH	2025-01-11	85/18903	0.048378339707665	0.0870810114737971	0.0401463585514808	BCL2	1
GO:0032092	BP	GO:0032092	positive regulation of protein binding	2025-01-11	86/18903	0.0489346070189209	0.087741548755396	0.0404508815019483	ACE	1
GO:0033077	BP	GO:0033077	T cell differentiation in thymus	2025-01-11	86/18903	0.0489346070189209	0.087741548755396	0.0404508815019483	BCL2	1
GO:0001892	BP	GO:0001892	embryonic placenta development	2025-01-11	87/18903	0.0494905787106252	0.0880571333296537	0.0405963732831879	EPAS1	1
GO:0010507	BP	GO:0010507	negative regulation of autophagy	2025-01-11	87/18903	0.0494905787106252	0.0880571333296537	0.0405963732831879	BCL2	1
GO:0045069	BP	GO:0045069	regulation of viral genome replication	2025-01-11	87/18903	0.0494905787106252	0.0880571333296537	0.0405963732831879	BCL2	1
GO:2000134	BP	GO:2000134	negative regulation of G1/S transition of mitotic cell cycle	2025-01-11	87/18903	0.0494905787106252	0.0880571333296537	0.0405963732831879	BCL2	1
GO:0055072	BP	GO:0055072	iron ion homeostasis	2025-01-11	88/18903	0.0500462549241759	0.0887053122652219	0.0408951987505594	EPAS1	1
GO:0072384	BP	GO:0072384	organelle transport along microtubule	2025-01-11	88/18903	0.0500462549241759	0.0887053122652219	0.0408951987505594	TRAK1	1
GO:0048678	BP	GO:0048678	response to axon injury	2025-01-11	89/18903	0.0506016358009147	0.0891781680369732	0.0411131961880556	BCL2	1
GO:0048864	BP	GO:0048864	stem cell development	2025-01-11	89/18903	0.0506016358009147	0.0891781680369732	0.0411131961880556	BCL2	1
GO:0071229	BP	GO:0071229	cellular response to acid chemical	2025-01-11	89/18903	0.0506016358009147	0.0891781680369732	0.0411131961880556	CYBB	1
GO:0006493	BP	GO:0006493	protein O-linked glycosylation	2025-01-11	90/18903	0.0511567214821194	0.0896451433155475	0.0413284825823111	TRAK1	1
GO:0030641	BP	GO:0030641	regulation of cellular pH	2025-01-11	90/18903	0.0511567214821194	0.0896451433155475	0.0413284825823111	BCL2	1
GO:0055006	BP	GO:0055006	cardiac cell development	2025-01-11	90/18903	0.0511567214821194	0.0896451433155475	0.0413284825823111	SLC8A1	1
GO:0001942	BP	GO:0001942	hair follicle development	2025-01-11	91/18903	0.0517115121090105	0.0899372827862152	0.0414631656290279	BCL2	1
GO:0042475	BP	GO:0042475	odontogenesis of dentin-containing tooth	2025-01-11	91/18903	0.0517115121090105	0.0899372827862152	0.0414631656290279	BSG	1
GO:1901216	BP	GO:1901216	positive regulation of neuron death	2025-01-11	91/18903	0.0517115121090105	0.0899372827862152	0.0414631656290279	DDIT4	1
GO:2000117	BP	GO:2000117	negative regulation of cysteine-type endopeptidase activity	2025-01-11	91/18903	0.0517115121090105	0.0899372827862152	0.0414631656290279	PLAUR	1
GO:0001656	BP	GO:0001656	metanephros development	2025-01-11	92/18903	0.0522660078227462	0.0900568573451407	0.0415182922638132	BCL2	1
GO:0002028	BP	GO:0002028	regulation of sodium ion transport	2025-01-11	92/18903	0.0522660078227462	0.0900568573451407	0.0415182922638132	SLC8A1	1
GO:0009791	BP	GO:0009791	post-embryonic development	2025-01-11	92/18903	0.0522660078227462	0.0900568573451407	0.0415182922638132	BCL2	1
GO:0046031	BP	GO:0046031	ADP metabolic process	2025-01-11	92/18903	0.0522660078227462	0.0900568573451407	0.0415182922638132	DDIT4	1
GO:0072091	BP	GO:0072091	regulation of stem cell proliferation	2025-01-11	92/18903	0.0522660078227462	0.0900568573451407	0.0415182922638132	ACE	1
GO:0050886	BP	GO:0050886	endocrine process	2025-01-11	93/18903	0.0528202087644268	0.0906746917122661	0.0418031281839324	ACE	1
GO:2000106	BP	GO:2000106	regulation of leukocyte apoptotic process	2025-01-11	93/18903	0.0528202087644268	0.0906746917122661	0.0418031281839324	BCL2	1
GO:0022404	BP	GO:0022404	molting cycle process	2025-01-11	94/18903	0.053374115075091	0.0909518468283261	0.0419309030969175	BCL2	1
GO:0022405	BP	GO:0022405	hair cycle process	2025-01-11	94/18903	0.053374115075091	0.0909518468283261	0.0419309030969175	BCL2	1
GO:1900542	BP	GO:1900542	regulation of purine nucleotide metabolic process	2025-01-11	94/18903	0.053374115075091	0.0909518468283261	0.0419309030969175	DDIT4	1
GO:1903035	BP	GO:1903035	negative regulation of response to wounding	2025-01-11	94/18903	0.053374115075091	0.0909518468283261	0.0419309030969175	PLAUR	1
GO:0007044	BP	GO:0007044	cell-substrate junction assembly	2025-01-11	95/18903	0.0539277268957179	0.0913912300408236	0.0421334689111161	BCL2	1
GO:0034109	BP	GO:0034109	homotypic cell-cell adhesion	2025-01-11	95/18903	0.0539277268957179	0.0913912300408236	0.0421334689111161	PLAUR	1
GO:0098773	BP	GO:0098773	skin epidermis development	2025-01-11	95/18903	0.0539277268957179	0.0913912300408236	0.0421334689111161	BCL2	1
GO:0003073	BP	GO:0003073	regulation of systemic arterial blood pressure	2025-01-11	96/18903	0.0544810443672272	0.0914926234210501	0.0421802136023918	ACE	1
GO:0032091	BP	GO:0032091	negative regulation of protein binding	2025-01-11	96/18903	0.0544810443672272	0.0914926234210501	0.0421802136023918	ACE	1
GO:0051153	BP	GO:0051153	regulation of striated muscle cell differentiation	2025-01-11	96/18903	0.0544810443672272	0.0914926234210501	0.0421802136023918	BCL2	1
GO:0061097	BP	GO:0061097	regulation of protein tyrosine kinase activity	2025-01-11	96/18903	0.0544810443672272	0.0914926234210501	0.0421802136023918	ACE	1
GO:0072080	BP	GO:0072080	nephron tubule development	2025-01-11	96/18903	0.0544810443672272	0.0914926234210501	0.0421802136023918	BCL2	1
GO:0001657	BP	GO:0001657	ureteric bud development	2025-01-11	97/18903	0.0550340676304782	0.0917564400961391	0.0423018391858655	BCL2	1
GO:0006576	BP	GO:0006576	cellular biogenic amine metabolic process	2025-01-11	97/18903	0.0550340676304782	0.0917564400961391	0.0423018391858655	EPAS1	1
GO:0006942	BP	GO:0006942	regulation of striated muscle contraction	2025-01-11	97/18903	0.0550340676304782	0.0917564400961391	0.0423018391858655	SLC8A1	1
GO:0060993	BP	GO:0060993	kidney morphogenesis	2025-01-11	97/18903	0.0550340676304782	0.0917564400961391	0.0423018391858655	BCL2	1
GO:0072163	BP	GO:0072163	mesonephric epithelium development	2025-01-11	98/18903	0.0555867968262703	0.0921806094059975	0.0424973910393856	BCL2	1
GO:0072164	BP	GO:0072164	mesonephric tubule development	2025-01-11	98/18903	0.0555867968262703	0.0921806094059975	0.0424973910393856	BCL2	1
GO:1902807	BP	GO:1902807	negative regulation of cell cycle G1/S phase transition	2025-01-11	98/18903	0.0555867968262703	0.0921806094059975	0.0424973910393856	BCL2	1
GO:0006140	BP	GO:0006140	regulation of nucleotide metabolic process	2025-01-11	99/18903	0.0561392320953428	0.0922713974333027	0.0425392464178969	DDIT4	1
GO:0006885	BP	GO:0006885	regulation of pH	2025-01-11	99/18903	0.0561392320953428	0.0922713974333027	0.0425392464178969	BCL2	1
GO:0043279	BP	GO:0043279	response to alkaloid	2025-01-11	99/18903	0.0561392320953428	0.0922713974333027	0.0425392464178969	SLC8A1	1
GO:0061326	BP	GO:0061326	renal tubule development	2025-01-11	99/18903	0.0561392320953428	0.0922713974333027	0.0425392464178969	BCL2	1
GO:2001237	BP	GO:2001237	negative regulation of extrinsic apoptotic signaling pathway	2025-01-11	99/18903	0.0561392320953428	0.0922713974333027	0.0425392464178969	BCL2	1
GO:0001776	BP	GO:0001776	leukocyte homeostasis	2025-01-11	100/18903	0.0566913735783757	0.0926858964852809	0.0427303400590746	BCL2	1
GO:0006165	BP	GO:0006165	nucleoside diphosphate phosphorylation	2025-01-11	100/18903	0.0566913735783757	0.0926858964852809	0.0427303400590746	DDIT4	1
GO:0036473	BP	GO:0036473	cell death in response to oxidative stress	2025-01-11	100/18903	0.0566913735783757	0.0926858964852809	0.0427303400590746	BCL2	1
GO:0015908	BP	GO:0015908	fatty acid transport	2025-01-11	101/18903	0.0572432214159885	0.0930955548291602	0.04291920202196	ACE	1
GO:0061337	BP	GO:0061337	cardiac conduction	2025-01-11	101/18903	0.0572432214159885	0.0930955548291602	0.04291920202196	SLC8A1	1
GO:0150115	BP	GO:0150115	cell-substrate junction organization	2025-01-11	101/18903	0.0572432214159885	0.0930955548291602	0.04291920202196	BCL2	1
GO:0001823	BP	GO:0001823	mesonephros development	2025-01-11	102/18903	0.0577947757487418	0.0936639110473491	0.0431812273720817	BCL2	1
GO:0046939	BP	GO:0046939	nucleotide phosphorylation	2025-01-11	102/18903	0.0577947757487418	0.0936639110473491	0.0431812273720817	DDIT4	1
GO:0019233	BP	GO:0019233	sensory perception of pain	2025-01-11	103/18903	0.0583460367171351	0.0940639583248422	0.0433656584112711	ACE	1
GO:0048477	BP	GO:0048477	oogenesis	2025-01-11	103/18903	0.0583460367171351	0.0940639583248422	0.0433656584112711	BCL2	1
GO:0070167	BP	GO:0070167	regulation of biomineral tissue development	2025-01-11	103/18903	0.0583460367171351	0.0940639583248422	0.0433656584112711	SLC8A1	1
GO:0009135	BP	GO:0009135	purine nucleoside diphosphate metabolic process	2025-01-11	104/18903	0.0588970044616091	0.0944593825880824	0.0435479581340617	DDIT4	1
GO:0009179	BP	GO:0009179	purine ribonucleoside diphosphate metabolic process	2025-01-11	104/18903	0.0588970044616091	0.0944593825880824	0.0435479581340617	DDIT4	1
GO:0042100	BP	GO:0042100	B cell proliferation	2025-01-11	104/18903	0.0588970044616091	0.0944593825880824	0.0435479581340617	BCL2	1
GO:0008585	BP	GO:0008585	female gonad development	2025-01-11	105/18903	0.0594476791225445	0.0946872827261146	0.0436530253639954	BCL2	1
GO:0032760	BP	GO:0032760	positive regulation of tumor necrosis factor production	2025-01-11	105/18903	0.0594476791225445	0.0946872827261146	0.0436530253639954	CYBB	1
GO:0110149	BP	GO:0110149	regulation of biomineralization	2025-01-11	105/18903	0.0594476791225445	0.0946872827261146	0.0436530253639954	SLC8A1	1
GO:1901796	BP	GO:1901796	regulation of signal transduction by p53 class mediator	2025-01-11	105/18903	0.0594476791225445	0.0946872827261146	0.0436530253639954	BCL2	1
GO:0030593	BP	GO:0030593	neutrophil chemotaxis	2025-01-11	106/18903	0.059998060840262	0.0954000041147906	0.0439816063936921	BSG	1
GO:0002444	BP	GO:0002444	myeloid leukocyte mediated immunity	2025-01-11	107/18903	0.060548149755023	0.0958338340922422	0.0441816120382108	ACE	1
GO:0006090	BP	GO:0006090	pyruvate metabolic process	2025-01-11	108/18903	0.0610979460070282	0.0958338340922422	0.0441816120382108	DDIT4	1
GO:0007631	BP	GO:0007631	feeding behavior	2025-01-11	108/18903	0.0610979460070282	0.0958338340922422	0.0441816120382108	ACE	1
GO:0019882	BP	GO:0019882	antigen processing and presentation	2025-01-11	108/18903	0.0610979460070282	0.0958338340922422	0.0441816120382108	ACE	1
GO:0032006	BP	GO:0032006	regulation of TOR signaling	2025-01-11	108/18903	0.0610979460070282	0.0958338340922422	0.0441816120382108	DDIT4	1
GO:0033138	BP	GO:0033138	positive regulation of peptidyl-serine phosphorylation	2025-01-11	108/18903	0.0610979460070282	0.0958338340922422	0.0441816120382108	BCL2	1
GO:0044106	BP	GO:0044106	cellular amine metabolic process	2025-01-11	108/18903	0.0610979460070282	0.0958338340922422	0.0441816120382108	EPAS1	1
GO:0062014	BP	GO:0062014	negative regulation of small molecule metabolic process	2025-01-11	108/18903	0.0610979460070282	0.0958338340922422	0.0441816120382108	DDIT4	1
GO:0046545	BP	GO:0046545	development of primary female sexual characteristics	2025-01-11	109/18903	0.0616474497364202	0.0962073836795649	0.0443538270299249	BCL2	1
GO:1903557	BP	GO:1903557	positive regulation of tumor necrosis factor superfamily cytokine production	2025-01-11	109/18903	0.0616474497364202	0.0962073836795649	0.0443538270299249	CYBB	1
GO:1904063	BP	GO:1904063	negative regulation of cation transmembrane transport	2025-01-11	109/18903	0.0616474497364202	0.0962073836795649	0.0443538270299249	BCL2	1
GO:0007173	BP	GO:0007173	epidermal growth factor receptor signaling pathway	2025-01-11	110/18903	0.0621966610832808	0.0967387664835593	0.0445988067817238	PLAUR	1
GO:1904035	BP	GO:1904035	regulation of epithelial cell apoptotic process	2025-01-11	110/18903	0.0621966610832808	0.0967387664835593	0.0445988067817238	BCL2	1
GO:0022037	BP	GO:0022037	metencephalon development	2025-01-11	111/18903	0.0627455801876324	0.0974290667235096	0.0449170511437517	BCL2	1
GO:0043473	BP	GO:0043473	pigmentation	2025-01-11	112/18903	0.0632942071894388	0.0979528047823201	0.0451585064913666	BCL2	1
GO:0045445	BP	GO:0045445	myoblast differentiation	2025-01-11	112/18903	0.0632942071894388	0.0979528047823201	0.0451585064913666	EPAS1	1
GO:0006939	BP	GO:0006939	smooth muscle contraction	2025-01-11	113/18903	0.063842542228602	0.0984726067319701	0.0453981472017031	SLC8A1	1
GO:1904659	BP	GO:1904659	glucose transmembrane transport	2025-01-11	113/18903	0.063842542228602	0.0984726067319701	0.0453981472017031	ACE	1
GO:0009185	BP	GO:0009185	ribonucleoside diphosphate metabolic process	2025-01-11	114/18903	0.0643905854449661	0.0991529446968166	0.0457117987247005	DDIT4	1
GO:0034766	BP	GO:0034766	negative regulation of ion transmembrane transport	2025-01-11	115/18903	0.0649383369783157	0.0995005593039648	0.0458720570912504	BCL2	1
GO:0042303	BP	GO:0042303	molting cycle	2025-01-11	115/18903	0.0649383369783157	0.0995005593039648	0.0458720570912504	BCL2	1
GO:0042633	BP	GO:0042633	hair cycle	2025-01-11	115/18903	0.0649383369783157	0.0995005593039648	0.0458720570912504	BCL2	1
GO:0008645	BP	GO:0008645	hexose transmembrane transport	2025-01-11	116/18903	0.0654857969683751	0.100008787132922	0.0461063618644937	ACE	1
GO:0072009	BP	GO:0072009	nephron epithelium development	2025-01-11	116/18903	0.0654857969683751	0.100008787132922	0.0461063618644937	BCL2	1
GO:0009308	BP	GO:0009308	amine metabolic process	2025-01-11	117/18903	0.0660329655548096	0.10034845749067	0.0462629577484948	EPAS1	1
GO:0046632	BP	GO:0046632	alpha-beta T cell differentiation	2025-01-11	117/18903	0.0660329655548096	0.10034845749067	0.0462629577484948	BCL2	1
GO:0071887	BP	GO:0071887	leukocyte apoptotic process	2025-01-11	117/18903	0.0660329655548096	0.10034845749067	0.0462629577484948	BCL2	1
GO:0043200	BP	GO:0043200	response to amino acid	2025-01-11	118/18903	0.0665798428772252	0.10101393510178	0.0465697583050279	CYBB	1
GO:0015718	BP	GO:0015718	monocarboxylic acid transport	2025-01-11	119/18903	0.0671264290751681	0.101510929449724	0.0467988841839413	ACE	1
GO:0015749	BP	GO:0015749	monosaccharide transmembrane transport	2025-01-11	119/18903	0.0671264290751681	0.101510929449724	0.0467988841839413	ACE	1
GO:0007006	BP	GO:0007006	mitochondrial membrane organization	2025-01-11	120/18903	0.0676727242881242	0.102170383412201	0.0471029076992601	BCL2	1
GO:0051101	BP	GO:0051101	regulation of DNA binding	2025-01-11	121/18903	0.0682187286555216	0.102827254412469	0.0474057404093141	PLAUR	1
GO:0071901	BP	GO:0071901	negative regulation of protein serine/threonine kinase activity	2025-01-11	122/18903	0.0687644423167291	0.103481555239623	0.0477073882101709	SLC8A1	1
GO:0022612	BP	GO:0022612	gland morphogenesis	2025-01-11	123/18903	0.0693098654110537	0.10396479811658	0.0479301743431916	BCL2	1
GO:0030282	BP	GO:0030282	bone mineralization	2025-01-11	123/18903	0.0693098654110537	0.10396479811658	0.0479301743431916	SLC8A1	1
GO:0046660	BP	GO:0046660	female sex differentiation	2025-01-11	124/18903	0.069854998077746	0.104108654691432	0.0479964955484259	BCL2	1
GO:0051209	BP	GO:0051209	release of sequestered calcium ion into cytosol	2025-01-11	124/18903	0.069854998077746	0.104108654691432	0.0479964955484259	SLC8A1	1
GO:0055007	BP	GO:0055007	cardiac muscle cell differentiation	2025-01-11	124/18903	0.069854998077746	0.104108654691432	0.0479964955484259	SLC8A1	1
GO:0072089	BP	GO:0072089	stem cell proliferation	2025-01-11	124/18903	0.069854998077746	0.104108654691432	0.0479964955484259	ACE	1
GO:0001952	BP	GO:0001952	regulation of cell-matrix adhesion	2025-01-11	125/18903	0.0703998404559955	0.104584378369724	0.0482158151571089	BCL2	1
GO:0051283	BP	GO:0051283	negative regulation of sequestering of calcium ion	2025-01-11	125/18903	0.0703998404559955	0.104584378369724	0.0482158151571089	SLC8A1	1
GO:0038127	BP	GO:0038127	ERBB signaling pathway	2025-01-11	126/18903	0.0709443926849326	0.104889078180116	0.0483562888106818	PLAUR	1
GO:0098659	BP	GO:0098659	inorganic cation import across plasma membrane	2025-01-11	126/18903	0.0709443926849326	0.104889078180116	0.0483562888106818	SLC8A1	1
GO:0099587	BP	GO:0099587	inorganic ion import across plasma membrane	2025-01-11	126/18903	0.0709443926849326	0.104889078180116	0.0483562888106818	SLC8A1	1
GO:0051282	BP	GO:0051282	regulation of sequestering of calcium ion	2025-01-11	127/18903	0.0714886549036292	0.105525450789274	0.0486496712887587	SLC8A1	1
GO:0030218	BP	GO:0030218	erythrocyte differentiation	2025-01-11	128/18903	0.0720326272510975	0.105990865812329	0.0488642383691655	EPAS1	1
GO:0045471	BP	GO:0045471	response to ethanol	2025-01-11	128/18903	0.0720326272510975	0.105990865812329	0.0488642383691655	CYBB	1
GO:0007041	BP	GO:0007041	lysosomal transport	2025-01-11	129/18903	0.0725763098662898	0.106241323788823	0.048979705283895	TRAK1	1
GO:0014902	BP	GO:0014902	myotube differentiation	2025-01-11	129/18903	0.0725763098662898	0.106241323788823	0.048979705283895	BCL2	1
GO:0051224	BP	GO:0051224	negative regulation of protein transport	2025-01-11	129/18903	0.0725763098662898	0.106241323788823	0.048979705283895	UCP2	1
GO:0019079	BP	GO:0019079	viral genome replication	2025-01-11	130/18903	0.0731197028881004	0.106241323788823	0.048979705283895	BCL2	1
GO:0031929	BP	GO:0031929	TOR signaling	2025-01-11	130/18903	0.0731197028881004	0.106241323788823	0.048979705283895	DDIT4	1
GO:0050853	BP	GO:0050853	B cell receptor signaling pathway	2025-01-11	130/18903	0.0731197028881004	0.106241323788823	0.048979705283895	BCL2	1
GO:0071621	BP	GO:0071621	granulocyte chemotaxis	2025-01-11	130/18903	0.0731197028881004	0.106241323788823	0.048979705283895	BSG	1
GO:1990266	BP	GO:1990266	neutrophil migration	2025-01-11	130/18903	0.0731197028881004	0.106241323788823	0.048979705283895	BSG	1
GO:0051208	BP	GO:0051208	sequestering of calcium ion	2025-01-11	131/18903	0.0736628064553633	0.10686294457609	0.0492662868311959	SLC8A1	1
GO:0009132	BP	GO:0009132	nucleoside diphosphate metabolic process	2025-01-11	132/18903	0.0742056207068547	0.107147368216907	0.0493974127020544	DDIT4	1
GO:0034219	BP	GO:0034219	carbohydrate transmembrane transport	2025-01-11	132/18903	0.0742056207068547	0.107147368216907	0.0493974127020544	ACE	1
GO:0048565	BP	GO:0048565	digestive tract development	2025-01-11	132/18903	0.0742056207068547	0.107147368216907	0.0493974127020544	BCL2	1
GO:0001101	BP	GO:0001101	response to acid chemical	2025-01-11	133/18903	0.0747481457812895	0.107595545247291	0.0496040326695056	CYBB	1
GO:1904950	BP	GO:1904950	negative regulation of establishment of protein localization	2025-01-11	133/18903	0.0747481457812895	0.107595545247291	0.0496040326695056	UCP2	1
GO:0043467	BP	GO:0043467	regulation of generation of precursor metabolites and energy	2025-01-11	134/18903	0.0752903818173264	0.108208037123506	0.0498864055778613	DDIT4	1
GO:0042476	BP	GO:0042476	odontogenesis	2025-01-11	135/18903	0.0758323289535618	0.1088182181733	0.0501677131418382	BSG	1
GO:0034101	BP	GO:0034101	erythrocyte homeostasis	2025-01-11	137/18903	0.0769153570807278	0.109862151022858	0.0506489903086133	EPAS1	1
GO:0061041	BP	GO:0061041	regulation of wound healing	2025-01-11	137/18903	0.0769153570807278	0.109862151022858	0.0506489903086133	PLAUR	1
GO:1904019	BP	GO:1904019	epithelial cell apoptotic process	2025-01-11	137/18903	0.0769153570807278	0.109862151022858	0.0506489903086133	BCL2	1
GO:0060048	BP	GO:0060048	cardiac muscle contraction	2025-01-11	140/18903	0.0785377359845247	0.112006894242545	0.0516377664934689	SLC8A1	1
GO:0001889	BP	GO:0001889	liver development	2025-01-11	141/18903	0.079077952629207	0.112604089227765	0.051913087181596	UCP2	1
GO:1903900	BP	GO:1903900	regulation of viral life cycle	2025-01-11	142/18903	0.0796178813426214	0.113199042951856	0.0521873745965519	BCL2	1
GO:0010212	BP	GO:0010212	response to ionizing radiation	2025-01-11	143/18903	0.0801575222628937	0.113444310133897	0.0523004484350902	BCL2	1
GO:0055076	BP	GO:0055076	transition metal ion homeostasis	2025-01-11	143/18903	0.0801575222628937	0.113444310133897	0.0523004484350902	EPAS1	1
GO:0055123	BP	GO:0055123	digestive system development	2025-01-11	143/18903	0.0801575222628937	0.113444310133897	0.0523004484350902	BCL2	1
GO:0061008	BP	GO:0061008	hepaticobiliary system development	2025-01-11	144/18903	0.0806968755280913	0.114033542095336	0.0525720979852457	UCP2	1
GO:0001508	BP	GO:0001508	action potential	2025-01-11	146/18903	0.0817747196452363	0.11503059956166	0.0530317645171567	SLC8A1	1
GO:0050671	BP	GO:0050671	positive regulation of lymphocyte proliferation	2025-01-11	146/18903	0.0817747196452363	0.11503059956166	0.0530317645171567	BCL2	1
GO:0072073	BP	GO:0072073	kidney epithelium development	2025-01-11	146/18903	0.0817747196452363	0.11503059956166	0.0530317645171567	BCL2	1
GO:0035264	BP	GO:0035264	multicellular organism growth	2025-01-11	147/18903	0.0823132107730236	0.115612646040292	0.0533001013936963	BCL2	1
GO:0009411	BP	GO:0009411	response to UV	2025-01-11	149/18903	0.0833893318561855	0.116418540106452	0.0536716371807408	BCL2	1
GO:0032946	BP	GO:0032946	positive regulation of mononuclear cell proliferation	2025-01-11	149/18903	0.0833893318561855	0.116418540106452	0.0536716371807408	BCL2	1
GO:0050796	BP	GO:0050796	regulation of insulin secretion	2025-01-11	149/18903	0.0833893318561855	0.116418540106452	0.0536716371807408	UCP2	1
GO:2000377	BP	GO:2000377	regulation of reactive oxygen species metabolic process	2025-01-11	149/18903	0.0833893318561855	0.116418540106452	0.0536716371807408	BCL2	1
GO:0010821	BP	GO:0010821	regulation of mitochondrion organization	2025-01-11	150/18903	0.083926962087047	0.116992923089763	0.0539364410088501	PLAUR	1
GO:0046718	BP	GO:0046718	viral entry into host cell	2025-01-11	151/18903	0.0844643056276562	0.117388922513999	0.0541190058941504	BSG	1
GO:1903531	BP	GO:1903531	negative regulation of secretion by cell	2025-01-11	151/18903	0.0844643056276562	0.117388922513999	0.0541190058941504	UCP2	1
GO:0007043	BP	GO:0007043	cell-cell junction assembly	2025-01-11	152/18903	0.0850013626156088	0.117606362902492	0.0542192509378431	ACE	1
GO:0030183	BP	GO:0030183	B cell differentiation	2025-01-11	152/18903	0.0850013626156088	0.117606362902492	0.0542192509378431	BCL2	1
GO:0072006	BP	GO:0072006	nephron development	2025-01-11	152/18903	0.0850013626156088	0.117606362902492	0.0542192509378431	BCL2	1
GO:0030902	BP	GO:0030902	hindbrain development	2025-01-11	153/18903	0.0855381331884442	0.118172651960786	0.054480323279486	BCL2	1
GO:0043524	BP	GO:0043524	negative regulation of neuron apoptotic process	2025-01-11	154/18903	0.0860746174836402	0.118560431511641	0.0546590986132133	BCL2	1
GO:0050729	BP	GO:0050729	positive regulation of inflammatory response	2025-01-11	154/18903	0.0860746174836402	0.118560431511641	0.0546590986132133	ACE	1
GO:0010675	BP	GO:0010675	regulation of cellular carbohydrate metabolic process	2025-01-11	155/18903	0.0866108156386181	0.118594130128507	0.0546746344542936	DDIT4	1
GO:0016052	BP	GO:0016052	carbohydrate catabolic process	2025-01-11	155/18903	0.0866108156386181	0.118594130128507	0.0546746344542936	DDIT4	1
GO:0050871	BP	GO:0050871	positive regulation of B cell activation	2025-01-11	155/18903	0.0866108156386181	0.118594130128507	0.0546746344542936	BCL2	1
GO:2001236	BP	GO:2001236	regulation of extrinsic apoptotic signaling pathway	2025-01-11	155/18903	0.0866108156386181	0.118594130128507	0.0546746344542936	BCL2	1
GO:0008643	BP	GO:0008643	carbohydrate transport	2025-01-11	156/18903	0.0871467277907395	0.119151941979374	0.0549317986074216	ACE	1
GO:0048754	BP	GO:0048754	branching morphogenesis of an epithelial tube	2025-01-11	157/18903	0.0876823540773083	0.11970772051497	0.0551880253552239	BCL2	1
GO:0044409	BP	GO:0044409	entry into host	2025-01-11	158/18903	0.0882176946355687	0.120084879481897	0.055361904354341	BSG	1
GO:0097530	BP	GO:0097530	granulocyte migration	2025-01-11	158/18903	0.0882176946355687	0.120084879481897	0.055361904354341	BSG	1
GO:0007292	BP	GO:0007292	female gamete generation	2025-01-11	159/18903	0.0887527496027072	0.120283331698406	0.0554533954119716	BCL2	1
GO:0035051	BP	GO:0035051	cardiocyte differentiation	2025-01-11	159/18903	0.0887527496027072	0.120283331698406	0.0554533954119716	SLC8A1	1
GO:0048592	BP	GO:0048592	eye morphogenesis	2025-01-11	159/18903	0.0887527496027072	0.120283331698406	0.0554533954119716	BCL2	1
GO:0051147	BP	GO:0051147	regulation of muscle cell differentiation	2025-01-11	160/18903	0.089287519115851	0.120831430978677	0.0557060818456174	BCL2	1
GO:0007034	BP	GO:0007034	vacuolar transport	2025-01-11	162/18903	0.0903562023283736	0.121921687857936	0.0562087154605373	TRAK1	1
GO:0050792	BP	GO:0050792	regulation of viral process	2025-01-11	162/18903	0.0903562023283736	0.121921687857936	0.0562087154605373	BCL2	1
GO:0007519	BP	GO:0007519	skeletal muscle tissue development	2025-01-11	164/18903	0.091423745368987	0.123004081214878	0.0567077238099591	BCL2	1
GO:0051100	BP	GO:0051100	negative regulation of binding	2025-01-11	164/18903	0.091423745368987	0.123004081214878	0.0567077238099591	ACE	1
GO:0030307	BP	GO:0030307	positive regulation of cell growth	2025-01-11	167/18903	0.0930229245024491	0.124793416807193	0.0575326488658608	BCL2	1
GO:0070665	BP	GO:0070665	positive regulation of leukocyte proliferation	2025-01-11	167/18903	0.0930229245024491	0.124793416807193	0.0575326488658608	BCL2	1
GO:0010970	BP	GO:0010970	transport along microtubule	2025-01-11	168/18903	0.0935554153132129	0.125145555548843	0.0576949929629596	TRAK1	1
GO:0048639	BP	GO:0048639	positive regulation of developmental growth	2025-01-11	168/18903	0.0935554153132129	0.125145555548843	0.0576949929629596	BCL2	1
GO:0002262	BP	GO:0002262	myeloid cell homeostasis	2025-01-11	169/18903	0.0940876219015001	0.125676117439035	0.0579395942545261	EPAS1	1
GO:0007156	BP	GO:0007156	homophilic cell adhesion via plasma membrane adhesion molecules	2025-01-11	170/18903	0.0946195444038535	0.126023444917201	0.0580997202479802	BSG	1
GO:0035637	BP	GO:0035637	multicellular organismal signaling	2025-01-11	170/18903	0.0946195444038535	0.126023444917201	0.0580997202479802	SLC8A1	1
GO:1903034	BP	GO:1903034	regulation of response to wounding	2025-01-11	172/18903	0.0956825376966398	0.127256402359806	0.0586681421201175	PLAUR	1
GO:0006937	BP	GO:0006937	regulation of muscle contraction	2025-01-11	174/18903	0.0967443962827541	0.128117221934447	0.0590649998357867	SLC8A1	1
GO:0031214	BP	GO:0031214	biomineral tissue development	2025-01-11	174/18903	0.0967443962827541	0.128117221934447	0.0590649998357867	SLC8A1	1
GO:0046631	BP	GO:0046631	alpha-beta T cell activation	2025-01-11	174/18903	0.0967443962827541	0.128117221934447	0.0590649998357867	BCL2	1
GO:0022900	BP	GO:0022900	electron transport chain	2025-01-11	176/18903	0.0978051212524441	0.129152916525663	0.0595424789750972	CYBB	1
GO:0060538	BP	GO:0060538	skeletal muscle organ development	2025-01-11	176/18903	0.0978051212524441	0.129152916525663	0.0595424789750972	BCL2	1
GO:0001764	BP	GO:0001764	neuron migration	2025-01-11	177/18903	0.0983350589715781	0.129667993835922	0.0597799415174975	DDIT4	1
GO:0090276	BP	GO:0090276	regulation of peptide hormone secretion	2025-01-11	179/18903	0.0993940855588111	0.13087829163781	0.0603379167716467	UCP2	1
GO:0035265	BP	GO:0035265	organ growth	2025-01-11	180/18903	0.0999231746988911	0.131388344604074	0.0605730629753636	BCL2	1
GO:0006941	BP	GO:0006941	striated muscle contraction	2025-01-11	181/18903	0.10045198125117	0.131710023507545	0.060721364383198	SLC8A1	1
GO:0110148	BP	GO:0110148	biomineralization	2025-01-11	181/18903	0.10045198125117	0.131710023507545	0.060721364383198	SLC8A1	1
GO:0002791	BP	GO:0002791	regulation of peptide secretion	2025-01-11	182/18903	0.100980505351492	0.132216000650894	0.0609546315383672	UCP2	1
GO:0030073	BP	GO:0030073	insulin secretion	2025-01-11	183/18903	0.101508747135645	0.132476228497739	0.0610746025890899	UCP2	1
GO:0044000	BP	GO:0044000	movement in host	2025-01-11	183/18903	0.101508747135645	0.132476228497739	0.0610746025890899	BSG	1
GO:0032640	BP	GO:0032640	tumor necrosis factor production	2025-01-11	184/18903	0.102036706739359	0.132476228497739	0.0610746025890899	CYBB	1
GO:0032680	BP	GO:0032680	regulation of tumor necrosis factor production	2025-01-11	184/18903	0.102036706739359	0.132476228497739	0.0610746025890899	CYBB	1
GO:0035725	BP	GO:0035725	sodium ion transmembrane transport	2025-01-11	184/18903	0.102036706739359	0.132476228497739	0.0610746025890899	SLC8A1	1
GO:0090087	BP	GO:0090087	regulation of peptide transport	2025-01-11	184/18903	0.102036706739359	0.132476228497739	0.0610746025890899	UCP2	1
GO:2000045	BP	GO:2000045	regulation of G1/S transition of mitotic cell cycle	2025-01-11	185/18903	0.102564384298302	0.132975082859477	0.0613045859773436	BCL2	1
GO:0006109	BP	GO:0006109	regulation of carbohydrate metabolic process	2025-01-11	186/18903	0.103091779948089	0.13347217878754	0.0615337586870394	DDIT4	1
GO:0045766	BP	GO:0045766	positive regulation of angiogenesis	2025-01-11	187/18903	0.103618893824275	0.133780939519642	0.0616761045193604	CYBB	1
GO:1904018	BP	GO:1904018	positive regulation of vasculature development	2025-01-11	187/18903	0.103618893824275	0.133780939519642	0.0616761045193604	CYBB	1
GO:0030308	BP	GO:0030308	negative regulation of cell growth	2025-01-11	188/18903	0.104145726062357	0.134087622305284	0.0618174923703462	BCL2	1
GO:0061138	BP	GO:0061138	morphogenesis of a branching epithelium	2025-01-11	188/18903	0.104145726062357	0.134087622305284	0.0618174923703462	BCL2	1
GO:0071706	BP	GO:0071706	tumor necrosis factor superfamily cytokine production	2025-01-11	189/18903	0.104672276797773	0.134392244586615	0.0619579302812303	CYBB	1
GO:1903555	BP	GO:1903555	regulation of tumor necrosis factor superfamily cytokine production	2025-01-11	189/18903	0.104672276797773	0.134392244586615	0.0619579302812303	CYBB	1
GO:0008217	BP	GO:0008217	regulation of blood pressure	2025-01-11	191/18903	0.105724534302076	0.135555523233783	0.0624942286185383	ACE	1
GO:0050731	BP	GO:0050731	positive regulation of peptidyl-tyrosine phosphorylation	2025-01-11	193/18903	0.106775667419541	0.136714148754026	0.0630283817568096	ACE	1
GO:1901991	BP	GO:1901991	negative regulation of mitotic cell cycle phase transition	2025-01-11	194/18903	0.107300812671192	0.137197039098199	0.0632510053640709	BCL2	1
GO:0045664	BP	GO:0045664	regulation of neuron differentiation	2025-01-11	196/18903	0.10835026123579	0.138348060834129	0.0637816529820659	BCL2	1
GO:0051650	BP	GO:0051650	establishment of vesicle localization	2025-01-11	197/18903	0.108874564818749	0.138826302045365	0.0640021332316109	TRAK1	1
GO:0071248	BP	GO:0071248	cellular response to metal ion	2025-01-11	198/18903	0.109398588115391	0.139302872504077	0.0642218432256346	CYBB	1
GO:0043393	BP	GO:0043393	regulation of protein binding	2025-01-11	200/18903	0.110445794389115	0.140443417556528	0.0647476608504519	ACE	1
GO:0098739	BP	GO:0098739	import across plasma membrane	2025-01-11	202/18903	0.111491881135157	0.141579416181219	0.0652713824670131	SLC8A1	1
GO:0001763	BP	GO:0001763	morphogenesis of a branching structure	2025-01-11	203/18903	0.112014505021982	0.14166090880679	0.0653089524505272	BCL2	1
GO:0051701	BP	GO:0051701	biological process involved in interaction with host	2025-01-11	203/18903	0.112014505021982	0.14166090880679	0.0653089524505272	BSG	1
GO:1903828	BP	GO:1903828	negative regulation of protein localization	2025-01-11	203/18903	0.112014505021982	0.14166090880679	0.0653089524505272	UCP2	1
GO:0050864	BP	GO:0050864	regulation of B cell activation	2025-01-11	204/18903	0.112536849430792	0.141934230506591	0.0654349600700345	BCL2	1
GO:1901888	BP	GO:1901888	regulation of cell junction assembly	2025-01-11	204/18903	0.112536849430792	0.141934230506591	0.0654349600700345	ACE	1
GO:0043281	BP	GO:0043281	regulation of cysteine-type endopeptidase activity involved in apoptotic process	2025-01-11	205/18903	0.113058914496104	0.142398931709087	0.0656491980626689	PLAUR	1
GO:0048167	BP	GO:0048167	regulation of synaptic plasticity	2025-01-11	207/18903	0.114102207134004	0.143395309341613	0.0661085511754896	ACE	1
GO:0019722	BP	GO:0019722	calcium-mediated signaling	2025-01-11	208/18903	0.114623434975335	0.143395309341613	0.0661085511754896	SLC8A1	1
GO:0030705	BP	GO:0030705	cytoskeleton-dependent intracellular transport	2025-01-11	208/18903	0.114623434975335	0.143395309341613	0.0661085511754896	TRAK1	1
GO:0032869	BP	GO:0032869	cellular response to insulin stimulus	2025-01-11	208/18903	0.114623434975335	0.143395309341613	0.0661085511754896	UCP2	1
GO:0045216	BP	GO:0045216	cell-cell junction organization	2025-01-11	208/18903	0.114623434975335	0.143395309341613	0.0661085511754896	ACE	1
GO:0099111	BP	GO:0099111	microtubule-based transport	2025-01-11	209/18903	0.115144384010653	0.143852889458052	0.0663195061828982	TRAK1	1
GO:0009612	BP	GO:0009612	response to mechanical stimulus	2025-01-11	211/18903	0.116185446200103	0.144958154276576	0.0668290588046212	SLC8A1	1
GO:0002064	BP	GO:0002064	epithelial cell development	2025-01-11	213/18903	0.117225394775489	0.14566748117544	0.0671560748960752	EPAS1	1
GO:0051648	BP	GO:0051648	vesicle localization	2025-01-11	213/18903	0.117225394775489	0.14566748117544	0.0671560748960752	TRAK1	1
GO:1902806	BP	GO:1902806	regulation of cell cycle G1/S phase transition	2025-01-11	213/18903	0.117225394775489	0.14566748117544	0.0671560748960752	BCL2	1
GO:0006469	BP	GO:0006469	negative regulation of protein kinase activity	2025-01-11	216/18903	0.118783231957413	0.147405697489319	0.0679574327833574	SLC8A1	1
GO:0046034	BP	GO:0046034	ATP metabolic process	2025-01-11	217/18903	0.119301955372004	0.147851487473059	0.0681629522671456	DDIT4	1
GO:0043523	BP	GO:0043523	regulation of neuron apoptotic process	2025-01-11	218/18903	0.119820401186566	0.148098015866596	0.0682766075533275	BCL2	1
GO:1901215	BP	GO:1901215	negative regulation of neuron death	2025-01-11	218/18903	0.119820401186566	0.148098015866596	0.0682766075533275	BCL2	1
GO:0007601	BP	GO:0007601	visual perception	2025-01-11	220/18903	0.120856460550392	0.149179679001616	0.0687752792535694	EPAS1	1
GO:0043583	BP	GO:0043583	ear development	2025-01-11	221/18903	0.121374074366907	0.149619370928354	0.068977987392167	BCL2	1
GO:0010810	BP	GO:0010810	regulation of cell-substrate adhesion	2025-01-11	222/18903	0.121891411117895	0.150057553926014	0.0691799998795908	BCL2	1
GO:0050953	BP	GO:0050953	sensory perception of light stimulus	2025-01-11	224/18903	0.122925253957166	0.150764837693608	0.0695060740403165	EPAS1	1
GO:0097191	BP	GO:0097191	extrinsic apoptotic signaling pathway	2025-01-11	224/18903	0.122925253957166	0.150764837693608	0.0695060740403165	BCL2	1
GO:0006486	BP	GO:0006486	protein glycosylation	2025-01-11	225/18903	0.123441760312242	0.150764837693608	0.0695060740403165	TRAK1	1
GO:0007596	BP	GO:0007596	blood coagulation	2025-01-11	225/18903	0.123441760312242	0.150764837693608	0.0695060740403165	PLAUR	1
GO:0030072	BP	GO:0030072	peptide hormone secretion	2025-01-11	225/18903	0.123441760312242	0.150764837693608	0.0695060740403165	UCP2	1
GO:0043413	BP	GO:0043413	macromolecule glycosylation	2025-01-11	225/18903	0.123441760312242	0.150764837693608	0.0695060740403165	TRAK1	1
GO:0046777	BP	GO:0046777	protein autophosphorylation	2025-01-11	226/18903	0.12395799013538	0.150997446590666	0.069613312116971	ACE	1
GO:0051651	BP	GO:0051651	maintenance of location in cell	2025-01-11	226/18903	0.12395799013538	0.150997446590666	0.069613312116971	SLC8A1	1
GO:0071241	BP	GO:0071241	cellular response to inorganic substance	2025-01-11	229/18903	0.125505021745417	0.152681305981629	0.0703896102067126	CYBB	1
GO:0002790	BP	GO:0002790	peptide secretion	2025-01-11	230/18903	0.12602014677277	0.152706766089357	0.0704013479047054	UCP2	1
GO:0008037	BP	GO:0008037	cell recognition	2025-01-11	230/18903	0.12602014677277	0.152706766089357	0.0704013479047054	BSG	1
GO:0050817	BP	GO:0050817	coagulation	2025-01-11	230/18903	0.12602014677277	0.152706766089357	0.0704013479047054	PLAUR	1
GO:0007599	BP	GO:0007599	hemostasis	2025-01-11	231/18903	0.126534995933885	0.152930822986586	0.0705046433118196	PLAUR	1
GO:0050769	BP	GO:0050769	positive regulation of neurogenesis	2025-01-11	231/18903	0.126534995933885	0.152930822986586	0.0705046433118196	ACE	1
GO:0046883	BP	GO:0046883	regulation of hormone secretion	2025-01-11	234/18903	0.128077889549203	0.154594015119936	0.0712714133182242	UCP2	1
GO:2000116	BP	GO:2000116	regulation of cysteine-type endopeptidase activity	2025-01-11	235/18903	0.128591636574483	0.155012284921386	0.0714642453620426	PLAUR	1
GO:0007411	BP	GO:0007411	axon guidance	2025-01-11	236/18903	0.1291051083978	0.155429136993196	0.071656423799736	BSG	1
GO:0097485	BP	GO:0097485	neuron projection guidance	2025-01-11	237/18903	0.129618305151838	0.155844577011354	0.0718479512480665	BSG	1
GO:0007160	BP	GO:0007160	cell-matrix adhesion	2025-01-11	238/18903	0.130131226969225	0.156258610622372	0.0720388303102061	BCL2	1
GO:0050670	BP	GO:0050670	regulation of lymphocyte proliferation	2025-01-11	239/18903	0.130643873982529	0.156671243443473	0.0722290635758246	BCL2	1
GO:0030595	BP	GO:0030595	leukocyte chemotaxis	2025-01-11	240/18903	0.131156246324267	0.156879793990446	0.072325210197151	BSG	1
GO:0033673	BP	GO:0033673	negative regulation of kinase activity	2025-01-11	240/18903	0.131156246324267	0.156879793990446	0.072325210197151	SLC8A1	1
GO:0042445	BP	GO:0042445	hormone metabolic process	2025-01-11	241/18903	0.131668344126894	0.15708694337919	0.072420710852156	ACE	1
GO:0048738	BP	GO:0048738	cardiac muscle tissue development	2025-01-11	241/18903	0.131668344126894	0.15708694337919	0.072420710852156	SLC8A1	1
GO:0009205	BP	GO:0009205	purine ribonucleoside triphosphate metabolic process	2025-01-11	242/18903	0.132180167522811	0.157091045248264	0.0724226019085849	DDIT4	1
GO:0032984	BP	GO:0032984	protein-containing complex disassembly	2025-01-11	242/18903	0.132180167522811	0.157091045248264	0.0724226019085849	DDIT4	1
GO:0097529	BP	GO:0097529	myeloid leukocyte migration	2025-01-11	242/18903	0.132180167522811	0.157091045248264	0.0724226019085849	BSG	1
GO:0032944	BP	GO:0032944	regulation of mononuclear cell proliferation	2025-01-11	243/18903	0.132691716644362	0.157497082367892	0.0726097944034111	BCL2	1
GO:0070085	BP	GO:0070085	glycosylation	2025-01-11	244/18903	0.133202991623832	0.157901756055361	0.0727963583245062	TRAK1	1
GO:0000209	BP	GO:0000209	protein polyubiquitination	2025-01-11	246/18903	0.134224719685394	0.158707034628011	0.0731676103548202	BCL2	1
GO:0045930	BP	GO:0045930	negative regulation of mitotic cell cycle	2025-01-11	246/18903	0.134224719685394	0.158707034628011	0.0731676103548202	BCL2	1
GO:0009144	BP	GO:0009144	purine nucleoside triphosphate metabolic process	2025-01-11	247/18903	0.134735173031777	0.158905223155798	0.0732589798458572	DDIT4	1
GO:0031330	BP	GO:0031330	negative regulation of cellular catabolic process	2025-01-11	247/18903	0.134735173031777	0.158905223155798	0.0732589798458572	BCL2	1
GO:0009199	BP	GO:0009199	ribonucleoside triphosphate metabolic process	2025-01-11	249/18903	0.135755259016044	0.159701935416083	0.0736262826082208	DDIT4	1
GO:0045926	BP	GO:0045926	negative regulation of growth	2025-01-11	249/18903	0.135755259016044	0.159701935416083	0.0736262826082208	BCL2	1
GO:0000082	BP	GO:0000082	G1/S transition of mitotic cell cycle	2025-01-11	250/18903	0.136264891917879	0.159895638997309	0.0737155844352551	BCL2	1
GO:0009636	BP	GO:0009636	response to toxic substance	2025-01-11	250/18903	0.136264891917879	0.159895638997309	0.0737155844352551	BCL2	1
GO:0010951	BP	GO:0010951	negative regulation of endopeptidase activity	2025-01-11	252/18903	0.137283338200401	0.160077552844996	0.0737994509226914	PLAUR	1
GO:0048762	BP	GO:0048762	mesenchymal cell differentiation	2025-01-11	252/18903	0.137283338200401	0.160077552844996	0.0737994509226914	BCL2	1
GO:0050851	BP	GO:0050851	antigen receptor-mediated signaling pathway	2025-01-11	252/18903	0.137283338200401	0.160077552844996	0.0737994509226914	BCL2	1
GO:0098657	BP	GO:0098657	import into cell	2025-01-11	252/18903	0.137283338200401	0.160077552844996	0.0737994509226914	SLC8A1	1
GO:1903320	BP	GO:1903320	regulation of protein modification by small protein conjugation or removal	2025-01-11	252/18903	0.137283338200401	0.160077552844996	0.0737994509226914	EPAS1	1
GO:0015833	BP	GO:0015833	peptide transport	2025-01-11	254/18903	0.138300692666667	0.161046191063477	0.074246015524637	UCP2	1
GO:0006814	BP	GO:0006814	sodium ion transport	2025-01-11	255/18903	0.13880896079797	0.161046191063477	0.074246015524637	SLC8A1	1
GO:0021537	BP	GO:0021537	telencephalon development	2025-01-11	255/18903	0.13880896079797	0.161046191063477	0.074246015524637	SLC8A1	1
GO:0051402	BP	GO:0051402	neuron apoptotic process	2025-01-11	255/18903	0.13880896079797	0.161046191063477	0.074246015524637	BCL2	1
GO:0090257	BP	GO:0090257	regulation of muscle system process	2025-01-11	256/18903	0.139316956370215	0.161433523193986	0.0744245845872463	SLC8A1	1
GO:0014706	BP	GO:0014706	striated muscle tissue development	2025-01-11	257/18903	0.139824679514952	0.161617802880749	0.0745095417811664	SLC8A1	1
GO:0050708	BP	GO:0050708	regulation of protein secretion	2025-01-11	257/18903	0.139824679514952	0.161617802880749	0.0745095417811664	UCP2	1
GO:0006470	BP	GO:0006470	protein dephosphorylation	2025-01-11	261/18903	0.141852850447879	0.163351046416378	0.0753086071027644	BCL2	1
GO:0034976	BP	GO:0034976	response to endoplasmic reticulum stress	2025-01-11	261/18903	0.141852850447879	0.163351046416378	0.0753086071027644	BCL2	1
GO:0045927	BP	GO:0045927	positive regulation of growth	2025-01-11	261/18903	0.141852850447879	0.163351046416378	0.0753086071027644	BCL2	1
GO:0010466	BP	GO:0010466	negative regulation of peptidase activity	2025-01-11	263/18903	0.14286530476548	0.164312825704219	0.075752009579189	PLAUR	1
GO:0050730	BP	GO:0050730	regulation of peptidyl-tyrosine phosphorylation	2025-01-11	266/18903	0.144381950257773	0.165851385240342	0.0764613210782703	ACE	1
GO:0009141	BP	GO:0009141	nucleoside triphosphate metabolic process	2025-01-11	267/18903	0.14488695635034	0.166225505614809	0.0766337992160475	DDIT4	1
GO:0070663	BP	GO:0070663	regulation of leukocyte proliferation	2025-01-11	269/18903	0.145896155713849	0.167176435533669	0.0770721998826656	BCL2	1
GO:0090596	BP	GO:0090596	sensory organ morphogenesis	2025-01-11	272/18903	0.147407924667336	0.168492165433564	0.077678781770314	BCL2	1
GO:1901988	BP	GO:1901988	negative regulation of cell cycle phase transition	2025-01-11	272/18903	0.147407924667336	0.168492165433564	0.077678781770314	BCL2	1
GO:0051348	BP	GO:0051348	negative regulation of transferase activity	2025-01-11	276/18903	0.149419832589168	0.170581508386895	0.0786420171521938	SLC8A1	1
GO:0051962	BP	GO:0051962	positive regulation of nervous system development	2025-01-11	279/18903	0.15092593008629	0.172088975633445	0.0793369943873033	ACE	1
GO:0044843	BP	GO:0044843	cell cycle G1/S phase transition	2025-01-11	280/18903	0.151427423576896	0.172448675252804	0.0795028242237419	BCL2	1
GO:0098742	BP	GO:0098742	cell-cell adhesion via plasma-membrane adhesion molecules	2025-01-11	282/18903	0.152429602826755	0.173376983828713	0.0799307959285274	BSG	1
GO:0072659	BP	GO:0072659	protein localization to plasma membrane	2025-01-11	285/18903	0.153930854324514	0.174869977890716	0.0806191006911152	BSG	1
GO:0046942	BP	GO:0046942	carboxylic acid transport	2025-01-11	290/18903	0.156427569144487	0.177488808564185	0.0818264421473448	ACE	1
GO:0022898	BP	GO:0022898	regulation of transmembrane transporter activity	2025-01-11	291/18903	0.156926107625087	0.177619660278944	0.0818867678115612	BCL2	1
GO:0046879	BP	GO:0046879	hormone secretion	2025-01-11	291/18903	0.156926107625087	0.177619660278944	0.0818867678115612	UCP2	1
GO:0030217	BP	GO:0030217	T cell differentiation	2025-01-11	296/18903	0.159414784738463	0.179777987168559	0.0828818063821437	BCL2	1
GO:0042886	BP	GO:0042886	amide transport	2025-01-11	296/18903	0.159414784738463	0.179777987168559	0.0828818063821437	UCP2	1
GO:0044262	BP	GO:0044262	cellular carbohydrate metabolic process	2025-01-11	296/18903	0.159414784738463	0.179777987168559	0.0828818063821437	DDIT4	1
GO:0009914	BP	GO:0009914	hormone transport	2025-01-11	300/18903	0.161400915844377	0.181796657336254	0.0838124599767436	UCP2	1
GO:0043588	BP	GO:0043588	skin development	2025-01-11	302/18903	0.162392380711747	0.182691428300716	0.0842249700676665	BCL2	1
GO:0046651	BP	GO:0046651	lymphocyte proliferation	2025-01-11	305/18903	0.163877580058728	0.184138808138716	0.0848922456189392	BCL2	1
GO:0071375	BP	GO:0071375	cellular response to peptide hormone stimulus	2025-01-11	306/18903	0.164372114235487	0.184470883651691	0.0850453401039986	UCP2	1
GO:0031349	BP	GO:0031349	positive regulation of defense response	2025-01-11	307/18903	0.164866382490765	0.184578667353791	0.0850950308813255	ACE	1
GO:0044403	BP	GO:0044403	biological process involved in symbiotic interaction	2025-01-11	307/18903	0.164866382490765	0.184578667353791	0.0850950308813255	BSG	1
GO:0002429	BP	GO:0002429	immune response-activating cell surface receptor signaling pathway	2025-01-11	312/18903	0.167333739447494	0.186664712957673	0.0860567461089143	BCL2	1
GO:0002757	BP	GO:0002757	immune response-activating signal transduction	2025-01-11	312/18903	0.167333739447494	0.186664712957673	0.0860567461089143	BCL2	1
GO:2001020	BP	GO:2001020	regulation of response to DNA damage stimulus	2025-01-11	312/18903	0.167333739447494	0.186664712957673	0.0860567461089143	BCL2	1
GO:0060485	BP	GO:0060485	mesenchyme development	2025-01-11	313/18903	0.16782641487464	0.186989286765374	0.0862063821344936	BCL2	1
GO:0019932	BP	GO:0019932	second-messenger-mediated signaling	2025-01-11	314/18903	0.168318825280039	0.187312786356058	0.0863555229212055	SLC8A1	1
GO:0007281	BP	GO:0007281	germ cell development	2025-01-11	316/18903	0.169302851538792	0.188181946494556	0.0867562258295462	BCL2	1
GO:0010948	BP	GO:0010948	negative regulation of cell cycle process	2025-01-11	318/18903	0.170285819249587	0.189047849633972	0.0871554271860475	BCL2	1
GO:0060326	BP	GO:0060326	cell chemotaxis	2025-01-11	319/18903	0.170776906469832	0.189366258729107	0.0873022211366804	BSG	1
GO:0006959	BP	GO:0006959	humoral immune response	2025-01-11	320/18903	0.171267729437376	0.189683614323115	0.0874485293989492	BCL2	1
GO:0009416	BP	GO:0009416	response to light stimulus	2025-01-11	321/18903	0.171758288280199	0.18999992032905	0.087594353776863	BCL2	1
GO:0022409	BP	GO:0022409	positive regulation of cell-cell adhesion	2025-01-11	322/18903	0.172248583126228	0.190315180641256	0.0877396960658034	PLAUR	1
GO:0015849	BP	GO:0015849	organic acid transport	2025-01-11	324/18903	0.173228381339334	0.191169892263765	0.0881337378743978	ACE	1
GO:0006605	BP	GO:0006605	protein targeting	2025-01-11	325/18903	0.173717884961986	0.191254726080476	0.088172848224236	TRAK1	1
GO:0031647	BP	GO:0031647	regulation of protein stability	2025-01-11	325/18903	0.173717884961986	0.191254726080476	0.088172848224236	BCL2	1
GO:0032409	BP	GO:0032409	regulation of transporter activity	2025-01-11	326/18903	0.174207125098999	0.191565842190714	0.0883162799403053	BCL2	1
GO:0048638	BP	GO:0048638	regulation of developmental growth	2025-01-11	332/18903	0.17713703986723	0.194556914640903	0.0896952334573401	BCL2	1
GO:0060562	BP	GO:0060562	epithelial tube morphogenesis	2025-01-11	335/18903	0.178598450522562	0.195929897792207	0.0903282104168921	BCL2	1
GO:1990778	BP	GO:1990778	protein localization to cell periphery	2025-01-11	337/18903	0.17957141302275	0.196764420652588	0.0907129447396249	BSG	1
GO:0032496	BP	GO:0032496	response to lipopolysaccharide	2025-01-11	339/18903	0.18054332769307	0.197362812230514	0.0909888170846407	ACE	1
GO:0062012	BP	GO:0062012	regulation of small molecule metabolic process	2025-01-11	339/18903	0.18054332769307	0.197362812230514	0.0909888170846407	DDIT4	1
GO:0002768	BP	GO:0002768	immune response-regulating cell surface receptor signaling pathway	2025-01-11	341/18903	0.181514195549244	0.198190411394757	0.0913703594234617	BCL2	1
GO:0051235	BP	GO:0051235	maintenance of location	2025-01-11	342/18903	0.1819992372392	0.198486226965574	0.0915067372372942	SLC8A1	1
GO:0010506	BP	GO:0010506	regulation of autophagy	2025-01-11	344/18903	0.182968536776718	0.199308852634568	0.0918859866798782	BCL2	1
GO:0007517	BP	GO:0007517	muscle organ development	2025-01-11	348/18903	0.184904004028405	0.201180764946398	0.0927489815116536	BCL2	1
GO:0045765	BP	GO:0045765	regulation of angiogenesis	2025-01-11	349/18903	0.185387219116289	0.201470049379602	0.0928823483201252	CYBB	1
GO:0042113	BP	GO:0042113	B cell activation	2025-01-11	350/18903	0.185870173767023	0.201758373632354	0.0930152724632211	BCL2	1
GO:0006936	BP	GO:0006936	muscle contraction	2025-01-11	351/18903	0.186352868106945	0.202045741210687	0.0931477555573032	SLC8A1	1
GO:0045861	BP	GO:0045861	negative regulation of proteolysis	2025-01-11	352/18903	0.186835302262336	0.202332155604189	0.0932797992111515	PLAUR	1
GO:0016050	BP	GO:0016050	vesicle organization	2025-01-11	353/18903	0.187317476359426	0.2026176202861	0.0934114050260111	BCL2	1
GO:1901990	BP	GO:1901990	regulation of mitotic cell cycle phase transition	2025-01-11	354/18903	0.187799390524388	0.202902138713412	0.0935425745956343	BCL2	1
GO:1901342	BP	GO:1901342	regulation of vasculature development	2025-01-11	355/18903	0.188281044883342	0.203185714326959	0.0936733095063253	CYBB	1
GO:0016311	BP	GO:0016311	dephosphorylation	2025-01-11	357/18903	0.189243574687429	0.203986969459589	0.0940427066378167	BCL2	1
GO:0009306	BP	GO:0009306	protein secretion	2025-01-11	359/18903	0.190205066779557	0.204785246114575	0.0944107306222876	UCP2	1
GO:0002237	BP	GO:0002237	response to molecule of bacterial origin	2025-01-11	360/18903	0.190685423998357	0.204826637365559	0.0944298129454572	ACE	1
GO:0035592	BP	GO:0035592	establishment of protein localization to extracellular region	2025-01-11	360/18903	0.190685423998357	0.204826637365559	0.0944298129454572	UCP2	1
GO:0008544	BP	GO:0008544	epidermis development	2025-01-11	362/18903	0.191645361410396	0.20561950234657	0.0947953420231733	BCL2	1
GO:0030336	BP	GO:0030336	negative regulation of cell migration	2025-01-11	368/18903	0.1945189664884	0.208220648885389	0.0959945306846849	BCL2	1
GO:0071692	BP	GO:0071692	protein localization to extracellular region	2025-01-11	368/18903	0.1945189664884	0.208220648885389	0.0959945306846849	UCP2	1
GO:0031589	BP	GO:0031589	cell-substrate adhesion	2025-01-11	369/18903	0.19499699677535	0.208491598628316	0.0961194447772625	BCL2	1
GO:0015711	BP	GO:0015711	organic anion transport	2025-01-11	372/18903	0.196429540612754	0.209781318142884	0.0967140352762288	ACE	1
GO:0051346	BP	GO:0051346	negative regulation of hydrolase activity	2025-01-11	373/18903	0.196906539968065	0.209807313276317	0.0967260196334354	PLAUR	1
GO:1901653	BP	GO:1901653	cellular response to peptide	2025-01-11	373/18903	0.196906539968065	0.209807313276317	0.0967260196334354	UCP2	1
GO:0050767	BP	GO:0050767	regulation of neurogenesis	2025-01-11	377/18903	0.198811964438877	0.211594363989482	0.0975498913072501	ACE	1
GO:0018108	BP	GO:0018108	peptidyl-tyrosine phosphorylation	2025-01-11	380/18903	0.200238334692002	0.212868046169135	0.0981370882242307	ACE	1
GO:0018212	BP	GO:0018212	peptidyl-tyrosine modification	2025-01-11	382/18903	0.201187965256458	0.213632581664074	0.0984895567542315	ACE	1
GO:0030900	BP	GO:0030900	forebrain development	2025-01-11	383/18903	0.201662396031372	0.213646904138379	0.098496159745849	SLC8A1	1
GO:2000146	BP	GO:2000146	negative regulation of cell motility	2025-01-11	383/18903	0.201662396031372	0.213646904138379	0.098496159745849	BCL2	1
GO:0001654	BP	GO:0001654	eye development	2025-01-11	388/18903	0.204030709813193	0.215909210042043	0.0995391350446482	BCL2	1
GO:0050878	BP	GO:0050878	regulation of body fluid levels	2025-01-11	390/18903	0.204976245604313	0.216662462571492	0.0998864018668322	PLAUR	1
GO:0150063	BP	GO:0150063	visual system development	2025-01-11	392/18903	0.205920760188266	0.217412921064377	0.100232380573595	BCL2	1
GO:0001701	BP	GO:0001701	in utero embryonic development	2025-01-11	393/18903	0.206392634837822	0.217663222405758	0.100347775275918	EPAS1	1
GO:0071900	BP	GO:0071900	regulation of protein serine/threonine kinase activity	2025-01-11	395/18903	0.207335619472158	0.218409226421239	0.100691700365665	SLC8A1	1
GO:0002253	BP	GO:0002253	activation of immune response	2025-01-11	397/18903	0.208277585379589	0.219150134764472	0.101033276232755	BCL2	1
GO:0048880	BP	GO:0048880	sensory system development	2025-01-11	398/18903	0.208748186620312	0.219150134764472	0.101033276232755	BCL2	1
GO:0050900	BP	GO:0050900	leukocyte migration	2025-01-11	398/18903	0.208748186620312	0.219150134764472	0.101033276232755	BSG	1
GO:0006631	BP	GO:0006631	fatty acid metabolic process	2025-01-11	400/18903	0.209688626294501	0.219639950932206	0.101259092804719	UCP3	1
GO:0051251	BP	GO:0051251	positive regulation of lymphocyte activation	2025-01-11	400/18903	0.209688626294501	0.219639950932206	0.101259092804719	BCL2	1
GO:0045786	BP	GO:0045786	negative regulation of cell cycle	2025-01-11	405/18903	0.21203528153951	0.221847297953867	0.102276730788928	BCL2	1
GO:0030099	BP	GO:0030099	myeloid cell differentiation	2025-01-11	407/18903	0.212972168654367	0.22257632507621	0.102612829138638	EPAS1	1
GO:0050727	BP	GO:0050727	regulation of inflammatory response	2025-01-11	414/18903	0.216243304252096	0.225740476398303	0.104071576015115	ACE	1
GO:0007018	BP	GO:0007018	microtubule-based movement	2025-01-11	415/18903	0.216709599003204	0.225972776463409	0.104178671713103	TRAK1	1
GO:0030098	BP	GO:0030098	lymphocyte differentiation	2025-01-11	419/18903	0.218572257087066	0.227403459393614	0.104838249604051	BCL2	1
GO:0040013	BP	GO:0040013	negative regulation of locomotion	2025-01-11	419/18903	0.218572257087066	0.227403459393614	0.104838249604051	BCL2	1
GO:0045860	BP	GO:0045860	positive regulation of protein kinase activity	2025-01-11	420/18903	0.219037291991418	0.227631804569557	0.104943522006745	ACE	1
GO:0001558	BP	GO:0001558	regulation of cell growth	2025-01-11	422/18903	0.219966607118383	0.228341595519306	0.10527075203638	BCL2	1
GO:0052548	BP	GO:0052548	regulation of endopeptidase activity	2025-01-11	428/18903	0.22274852386011	0.230970784807967	0.106482869053579	PLAUR	1
GO:0022412	BP	GO:0022412	cellular process involved in reproduction in multicellular organism	2025-01-11	430/18903	0.223673823155136	0.231671099513756	0.106805730315772	BCL2	1
GO:0006869	BP	GO:0006869	lipid transport	2025-01-11	433/18903	0.22505989456298	0.23284656502219	0.107347647077737	ACE	1
GO:0032102	BP	GO:0032102	negative regulation of response to external stimulus	2025-01-11	436/18903	0.226443715855378	0.234017084278634	0.107887283503237	PLAUR	1
GO:0051656	BP	GO:0051656	establishment of organelle localization	2025-01-11	437/18903	0.226904490162281	0.23423214073545	0.107986429499339	TRAK1	1
GO:0042060	BP	GO:0042060	wound healing	2025-01-11	442/18903	0.229204621241717	0.23634336361632	0.108959752033414	PLAUR	1
GO:0009150	BP	GO:0009150	purine ribonucleotide metabolic process	2025-01-11	447/18903	0.231498529363459	0.238443485244363	0.109927956633409	DDIT4	1
GO:0050804	BP	GO:0050804	modulation of chemical synaptic transmission	2025-01-11	448/18903	0.231956565567241	0.238591479256728	0.109996185292944	ACE	1
GO:0048568	BP	GO:0048568	embryonic organ development	2025-01-11	449/18903	0.232414353580178	0.238591479256728	0.109996185292944	EPAS1	1
GO:0099177	BP	GO:0099177	regulation of trans-synaptic signaling	2025-01-11	449/18903	0.232414353580178	0.238591479256728	0.109996185292944	ACE	1
GO:0002696	BP	GO:0002696	positive regulation of leukocyte activation	2025-01-11	450/18903	0.232871893523314	0.238796731522248	0.110090811330304	BCL2	1
GO:0009314	BP	GO:0009314	response to radiation	2025-01-11	452/18903	0.233786229684085	0.239469430847676	0.110400941264017	BCL2	1
GO:1901987	BP	GO:1901987	regulation of cell cycle phase transition	2025-01-11	453/18903	0.234243026143544	0.239672500259454	0.110494560955361	BCL2	1
GO:0007015	BP	GO:0007015	actin filament organization	2025-01-11	454/18903	0.234699575016846	0.239874868843016	0.110587857548702	BCL2	1
GO:0003012	BP	GO:0003012	muscle system process	2025-01-11	455/18903	0.235155876424771	0.240076539037184	0.110680832168395	SLC8A1	1
GO:0051960	BP	GO:0051960	regulation of nervous system development	2025-01-11	456/18903	0.235611930488048	0.240277513269989	0.110773485933817	ACE	1
GO:0052547	BP	GO:0052547	regulation of peptidase activity	2025-01-11	459/18903	0.236978609816479	0.241405682747117	0.111293598132436	PLAUR	1
GO:0002443	BP	GO:0002443	leukocyte mediated immunity	2025-01-11	463/18903	0.238797393410975	0.242991420079005	0.112024659685546	ACE	1
GO:0032103	BP	GO:0032103	positive regulation of response to external stimulus	2025-01-11	464/18903	0.239251473056988	0.243186530179636	0.112114609950528	ACE	1
GO:0009259	BP	GO:0009259	ribonucleotide metabolic process	2025-01-11	466/18903	0.240158893687866	0.24384150542021	0.112416568671555	DDIT4	1
GO:0050867	BP	GO:0050867	positive regulation of cell activation	2025-01-11	467/18903	0.240612234913088	0.244034509589095	0.112505548053339	BCL2	1
GO:0023061	BP	GO:0023061	signal release	2025-01-11	470/18903	0.241970783668948	0.245144170995754	0.113017127603788	UCP2	1
GO:0044772	BP	GO:0044772	mitotic cell cycle phase transition	2025-01-11	473/18903	0.243327122564479	0.245980635351442	0.113402757000721	BCL2	1
GO:1903131	BP	GO:1903131	mononuclear cell differentiation	2025-01-11	473/18903	0.243327122564479	0.245980635351442	0.113402757000721	BCL2	1
GO:0019693	BP	GO:0019693	ribose phosphate metabolic process	2025-01-11	475/18903	0.244230122392698	0.246624535357332	0.113699609782634	DDIT4	1
GO:0006163	BP	GO:0006163	purine nucleotide metabolic process	2025-01-11	476/18903	0.244681254835377	0.246811233114684	0.113785681762972	DDIT4	1
GO:0010876	BP	GO:0010876	lipid localization	2025-01-11	483/18903	0.247832333627066	0.249446876517144	0.115000774275774	ACE	1
GO:0022411	BP	GO:0022411	cellular component disassembly	2025-01-11	483/18903	0.247832333627066	0.249446876517144	0.115000774275774	DDIT4	1
GO:0045785	BP	GO:0045785	positive regulation of cell adhesion	2025-01-11	484/18903	0.248281510843684	0.249627939861274	0.115084248661418	PLAUR	1
GO:0001819	BP	GO:0001819	positive regulation of cytokine production	2025-01-11	486/18903	0.249179133797383	0.250259000032691	0.115375181982936	CYBB	1
GO:0022407	BP	GO:0022407	regulation of cell-cell adhesion	2025-01-11	490/18903	0.250971457121467	0.251786299514719	0.116079302336883	PLAUR	1
GO:0001667	BP	GO:0001667	ameboidal-type cell migration	2025-01-11	492/18903	0.251866159395608	0.252410734875382	0.116367181467558	SLC8A1	1
GO:0016049	BP	GO:0016049	cell growth	2025-01-11	493/18903	0.252313146101743	0.252585622501421	0.116447808704454	BCL2	1
GO:0033674	BP	GO:0033674	positive regulation of kinase activity	2025-01-11	496/18903	0.253652649921278	0.253652649921278	0.116939733001804	ACE	1
GO:0030667	CC	GO:0030667	secretory granule membrane	2025-03-11	313/19869	0.000581684809296646	0.0494312379370369	0.0327397909458789	BSG/CYBB/PLAUR	3
GO:0035579	CC	GO:0035579	specific granule membrane	2025-02-11	91/19869	0.00111081433566375	0.0494312379370369	0.0327397909458789	CYBB/PLAUR	2
GO:0042383	CC	GO:0042383	sarcolemma	2025-02-11	136/19869	0.00245655995645045	0.0728779453746968	0.0482692482670966	BSG/SLC8A1	2
GO:0042581	CC	GO:0042581	specific granule	2025-02-11	160/19869	0.00337927612721564	0.0751888938305479	0.049799858716862	CYBB/PLAUR	2
GO:1905370	CC	GO:1905370	serine-type endopeptidase complex	2025-01-11	11/19869	0.00607458371043479	0.0842451148674494	0.0557980654355667	PLAUR	1
GO:1905286	CC	GO:1905286	serine-type peptidase complex	2025-01-11	13/19869	0.00717544246766022	0.0842451148674494	0.0557980654355667	PLAUR	1
GO:0098637	CC	GO:0098637	protein complex involved in cell-matrix adhesion	2025-01-11	14/19869	0.00772545607225639	0.0842451148674494	0.0557980654355667	PLAUR	1
GO:0009925	CC	GO:0009925	basal plasma membrane	2025-02-11	254/19869	0.00829719899384777	0.0842451148674494	0.0557980654355667	BSG/ACE	2
GO:0043020	CC	GO:0043020	NADPH oxidase complex	2025-01-11	17/19869	0.00937383529731439	0.0842451148674494	0.0557980654355667	CYBB	1
GO:0045178	CC	GO:0045178	basal part of cell	2025-02-11	272/19869	0.00946574324353365	0.0842451148674494	0.0557980654355667	BSG/ACE	2
GO:0097038	CC	GO:0097038	perinuclear endoplasmic reticulum	2025-01-11	21/19869	0.0115678019084609	0.0935940336230014	0.0619901346290725	CYBB	1
GO:0046930	CC	GO:0046930	pore complex	2025-01-11	26/19869	0.0143040480226203	0.106088356167767	0.0702654990584857	BCL2	1
GO:0002080	CC	GO:0002080	acrosomal membrane	2025-01-11	30/19869	0.016488084953394	0.11009011969952	0.072915987027476	BSG	1
GO:0043198	CC	GO:0043198	dendritic shaft	2025-01-11	38/19869	0.0208429662138025	0.11009011969952	0.072915987027476	SLC8A1	1
GO:0005925	CC	GO:0005925	focal adhesion	2025-02-11	422/19869	0.0218042668145246	0.11009011969952	0.072915987027476	BSG/PLAUR	2
GO:0030055	CC	GO:0030055	cell-substrate junction	2025-02-11	432/19869	0.0227822650780343	0.11009011969952	0.072915987027476	BSG/PLAUR	2
GO:0043209	CC	GO:0043209	myelin sheath	2025-01-11	47/19869	0.0257212486080649	0.11009011969952	0.072915987027476	BCL2	1
GO:0014704	CC	GO:0014704	intercalated disc	2025-01-11	50/19869	0.0273424261116374	0.11009011969952	0.072915987027476	SLC8A1	1
GO:0097225	CC	GO:0097225	sperm midpiece	2025-01-11	50/19869	0.0273424261116374	0.11009011969952	0.072915987027476	ACE	1
GO:0030315	CC	GO:0030315	T-tubule	2025-01-11	52/19869	0.0284218482762422	0.11009011969952	0.072915987027476	SLC8A1	1
GO:0098636	CC	GO:0098636	protein complex involved in cell adhesion	2025-01-11	52/19869	0.0284218482762422	0.11009011969952	0.072915987027476	PLAUR	1
GO:0005635	CC	GO:0005635	nuclear envelope	2025-02-11	488/19869	0.0285919275571697	0.11009011969952	0.072915987027476	BCL2/CYBB	2
GO:0043025	CC	GO:0043025	neuronal cell body	2025-02-11	497/19869	0.0295769230387722	0.11009011969952	0.072915987027476	CYBB/SLC8A1	2
GO:0005743	CC	GO:0005743	mitochondrial inner membrane	2025-02-11	498/19869	0.0296872232897581	0.11009011969952	0.072915987027476	UCP3/UCP2	2
GO:0031526	CC	GO:0031526	brush border membrane	2025-01-11	57/19869	0.0311156409721354	0.110771681860802	0.0733674060816666	ACE	1
GO:1904115	CC	GO:1904115	axon cytoplasm	2025-01-11	62/19869	0.0338026421411664	0.115709044252454	0.0766375692269359	TRAK1	1
GO:0001917	CC	GO:0001917	photoreceptor inner segment	2025-01-11	71/19869	0.0386221787801928	0.121807899531171	0.0806770239354887	BSG	1
GO:0044291	CC	GO:0044291	cell-cell contact zone	2025-01-11	72/19869	0.0391563315245822	0.121807899531171	0.0806770239354887	SLC8A1	1
GO:0070821	CC	GO:0070821	tertiary granule membrane	2025-01-11	73/19869	0.039690214453977	0.121807899531171	0.0806770239354887	CYBB	1
GO:0030670	CC	GO:0030670	phagocytic vesicle membrane	2025-01-11	77/19869	0.0418230504742281	0.123718453241262	0.081942440940398	CYBB	1
GO:0005791	CC	GO:0005791	rough endoplasmic reticulum	2025-01-11	80/19869	0.0434198504377624	0.123718453241262	0.081942440940398	CYBB	1
GO:1905369	CC	GO:1905369	endopeptidase complex	2025-01-11	82/19869	0.0444830393676446	0.123718453241262	0.081942440940398	PLAUR	1
GO:0120111	CC	GO:0120111	neuron projection cytoplasm	2025-01-11	90/19869	0.0487250612328516	0.131410013627994	0.0870367919948864	TRAK1	1
GO:0001750	CC	GO:0001750	photoreceptor outer segment	2025-01-11	97/19869	0.0524227784578353	0.135870230678404	0.0899909274747563	BSG	1
GO:0005903	CC	GO:0005903	brush border	2025-01-11	102/19869	0.0550559997194392	0.135870230678404	0.0899909274747563	ACE	1
GO:0042470	CC	GO:0042470	melanosome	2025-01-11	110/19869	0.0592553198954802	0.135870230678404	0.0899909274747563	BSG	1
GO:0048770	CC	GO:0048770	pigment granule	2025-01-11	110/19869	0.0592553198954802	0.135870230678404	0.0899909274747563	BSG	1
GO:0043679	CC	GO:0043679	axon terminus	2025-01-11	115/19869	0.0618712724522007	0.135870230678404	0.0899909274747563	SLC8A1	1
GO:0099055	CC	GO:0099055	integral component of postsynaptic membrane	2025-01-11	118/19869	0.0634376680028678	0.135870230678404	0.0899909274747563	SLC8A1	1
GO:1905368	CC	GO:1905368	peptidase complex	2025-01-11	118/19869	0.0634376680028678	0.135870230678404	0.0899909274747563	PLAUR	1
GO:0097733	CC	GO:0097733	photoreceptor cell cilium	2025-01-11	122/19869	0.0655224968386932	0.135870230678404	0.0899909274747563	BSG	1
GO:0098936	CC	GO:0098936	intrinsic component of postsynaptic membrane	2025-01-11	123/19869	0.0660430443919809	0.135870230678404	0.0899909274747563	SLC8A1	1
GO:1990204	CC	GO:1990204	oxidoreductase complex	2025-01-11	125/19869	0.0670833487533988	0.135870230678404	0.0899909274747563	CYBB	1
GO:0030018	CC	GO:0030018	Z disc	2025-01-11	130/19869	0.0696795025810039	0.135870230678404	0.0899909274747563	SLC8A1	1
GO:0044306	CC	GO:0044306	neuron projection terminus	2025-01-11	131/19869	0.0701979445219134	0.135870230678404	0.0899909274747563	SLC8A1	1
GO:0001669	CC	GO:0001669	acrosomal vesicle	2025-01-11	133/19869	0.0712340405379828	0.135870230678404	0.0899909274747563	BSG	1
GO:0097731	CC	GO:0097731	9+0 non-motile cilium	2025-01-11	134/19869	0.0717516948526405	0.135870230678404	0.0899909274747563	BSG	1
GO:0045335	CC	GO:0045335	phagocytic vesicle	2025-01-11	139/19869	0.0743360342777311	0.13783139688996	0.0912898666568627	CYBB	1
GO:0031674	CC	GO:0031674	I band	2025-01-11	143/19869	0.0763987944096021	0.138765157192951	0.0919083241017769	SLC8A1	1
GO:0036126	CC	GO:0036126	sperm flagellum	2025-01-11	150/19869	0.0799985719555636	0.140066008528353	0.0927699169436753	ACE	1
GO:0099699	CC	GO:0099699	integral component of synaptic membrane	2025-01-11	155/19869	0.0825620274158577	0.140066008528353	0.0927699169436753	SLC8A1	1
GO:0098862	CC	GO:0098862	cluster of actin-based cell projections	2025-01-11	159/19869	0.0846081146589973	0.140066008528353	0.0927699169436753	ACE	1
GO:0070820	CC	GO:0070820	tertiary granule	2025-01-11	164/19869	0.0871598897532744	0.140066008528353	0.0927699169436753	CYBB	1
GO:0097729	CC	GO:0097729	9+2 motile cilium	2025-01-11	165/19869	0.0876694680944423	0.140066008528353	0.0927699169436753	ACE	1
GO:0099240	CC	GO:0099240	intrinsic component of synaptic membrane	2025-01-11	166/19869	0.0881787878189124	0.140066008528353	0.0927699169436753	SLC8A1	1
GO:0097730	CC	GO:0097730	non-motile cilium	2025-01-11	168/19869	0.0891966518902385	0.140066008528353	0.0927699169436753	BSG	1
GO:0031225	CC	GO:0031225	anchored component of membrane	2025-01-11	169/19869	0.0897051964732146	0.140066008528353	0.0927699169436753	PLAUR	1
GO:0043197	CC	GO:0043197	dendritic spine	2025-01-11	175/19869	0.0927510470636683	0.140677000895499	0.0931745955073679	SLC8A1	1
GO:0044309	CC	GO:0044309	neuron spine	2025-01-11	176/19869	0.0932577871104995	0.140677000895499	0.0931745955073679	SLC8A1	1
GO:0030666	CC	GO:0030666	endocytic vesicle membrane	2025-01-11	194/19869	0.102335220027676	0.151797243041053	0.100539865290348	CYBB	1
GO:0005741	CC	GO:0005741	mitochondrial outer membrane	2025-01-11	207/19869	0.108839679506361	0.158798876656821	0.105177257158864	BCL2	1
GO:0030017	CC	GO:0030017	sarcomere	2025-01-11	214/19869	0.112324305728814	0.161239729191362	0.106793906974764	SLC8A1	1
GO:0016323	CC	GO:0016323	basolateral plasma membrane	2025-01-11	229/19869	0.119749686858184	0.165226340770858	0.109434359351485	BSG	1
GO:0030016	CC	GO:0030016	myofibril	2025-01-11	233/19869	0.121720228640067	0.165226340770858	0.109434359351485	SLC8A1	1
GO:0031968	CC	GO:0031968	organelle outer membrane	2025-01-11	235/19869	0.12270399491808	0.165226340770858	0.109434359351485	BCL2	1
GO:0019867	CC	GO:0019867	outer membrane	2025-01-11	237/19869	0.123686759346499	0.165226340770858	0.109434359351485	BCL2	1
GO:0043292	CC	GO:0043292	contractile fiber	2025-01-11	242/19869	0.126139293350286	0.165226340770858	0.109434359351485	SLC8A1	1
GO:0031514	CC	GO:0031514	motile cilium	2025-01-11	244/19869	0.127118558532082	0.165226340770858	0.109434359351485	ACE	1
GO:0032838	CC	GO:0032838	plasma membrane bounded cell projection cytoplasm	2025-01-11	246/19869	0.12809682599089	0.165226340770858	0.109434359351485	TRAK1	1
GO:0045211	CC	GO:0045211	postsynaptic membrane	2025-01-11	269/19869	0.139275485730241	0.177078831857021	0.117284619562308	SLC8A1	1
GO:0150034	CC	GO:0150034	distal axon	2025-01-11	278/19869	0.143614159342164	0.180023382837361	0.119234883960878	SLC8A1	1
GO:0099568	CC	GO:0099568	cytoplasmic region	2025-01-11	285/19869	0.146974927261873	0.181677340643148	0.120330349805042	TRAK1	1
GO:0031965	CC	GO:0031965	nuclear membrane	2025-01-11	305/19869	0.156511162417419	0.185664015163475	0.122970843869362	BCL2	1
GO:0005788	CC	GO:0005788	endoplasmic reticulum lumen	2025-01-11	312/19869	0.159825879123167	0.185664015163475	0.122970843869362	PLAUR	1
GO:0005938	CC	GO:0005938	cell cortex	2025-01-11	312/19869	0.159825879123167	0.185664015163475	0.122970843869362	TRAK1	1
GO:0019898	CC	GO:0019898	extrinsic component of membrane	2025-01-11	316/19869	0.161714681842689	0.185664015163475	0.122970843869362	PLAUR	1
GO:0014069	CC	GO:0014069	postsynaptic density	2025-01-11	321/19869	0.164070256541225	0.185664015163475	0.122970843869362	SLC8A1	1
GO:0045121	CC	GO:0045121	membrane raft	2025-01-11	326/19869	0.166419812297182	0.185664015163475	0.122970843869362	BSG	1
GO:0032279	CC	GO:0032279	asymmetric synapse	2025-01-11	327/19869	0.166889002394135	0.185664015163475	0.122970843869362	SLC8A1	1
GO:0098857	CC	GO:0098857	membrane microdomain	2025-01-11	327/19869	0.166889002394135	0.185664015163475	0.122970843869362	BSG	1
GO:0099572	CC	GO:0099572	postsynaptic specialization	2025-01-11	342/19869	0.173898104508857	0.187466801196718	0.124164883110777	SLC8A1	1
GO:0030139	CC	GO:0030139	endocytic vesicle	2025-01-11	343/19869	0.174363466359136	0.187466801196718	0.124164883110777	CYBB	1
GO:0031253	CC	GO:0031253	cell projection membrane	2025-01-11	344/19869	0.174828589880086	0.187466801196718	0.124164883110777	ACE	1
GO:0098984	CC	GO:0098984	neuron to neuron synapse	2025-01-11	351/19869	0.178077790527825	0.188677659011624	0.124966870545842	SLC8A1	1
GO:0097060	CC	GO:0097060	synaptic membrane	2025-01-11	378/19869	0.190501765376542	0.199466554335438	0.132112679394258	SLC8A1	1
GO:0005769	CC	GO:0005769	early endosome	2025-01-11	414/19869	0.206801493765577	0.213847144635271	0.141637375512421	TRAK1	1
GO:0016607	CC	GO:0016607	nuclear speck	2025-01-11	419/19869	0.209041590823243	0.213847144635271	0.141637375512421	EPAS1	1
GO:0009897	CC	GO:0009897	external side of plasma membrane	2025-01-11	462/19869	0.228070340736177	0.229819125180934	0.152216097103871	ACE	1
GO:0005874	CC	GO:0005874	microtubule	2025-01-11	466/19869	0.229819125180934	0.229819125180934	0.152216097103871	SLC8A1	1
GO:0046982	MF	GO:0046982	protein heterodimerization activity	2025-03-11	341/18432	0.000927466907916369	0.0630677497383131	0.0370986763166548	BCL2/CYBB/EPAS1	3
GO:0005432	MF	GO:0005432	calcium:sodium antiporter activity	2025-01-11	10/18432	0.00595333008971466	0.0697541499538163	0.0410318529140096	SLC8A1	1
GO:0016175	MF	GO:0016175	superoxide-generating NAD(P)H oxidase activity	2025-01-11	10/18432	0.00595333008971466	0.0697541499538163	0.0410318529140096	CYBB	1
GO:0070008	MF	GO:0070008	serine-type exopeptidase activity	2025-01-11	10/18432	0.00595333008971466	0.0697541499538163	0.0410318529140096	ACE	1
GO:0015368	MF	GO:0015368	calcium:cation antiporter activity	2025-01-11	11/18432	0.00654688743251219	0.0697541499538163	0.0410318529140096	SLC8A1	1
GO:0070513	MF	GO:0070513	death domain binding	2025-01-11	11/18432	0.00654688743251219	0.0697541499538163	0.0410318529140096	BCL2	1
GO:0031404	MF	GO:0031404	chloride ion binding	2025-01-11	14/18432	0.00832562678399451	0.0697541499538163	0.0410318529140096	ACE	1
GO:0050664	MF	GO:0050664	oxidoreductase activity, acting on NAD(P)H, oxygen as acceptor	2025-01-11	16/18432	0.00950984402772348	0.0697541499538163	0.0410318529140096	CYBB	1
GO:0016805	MF	GO:0016805	dipeptidase activity	2025-01-11	17/18432	0.0101014704241011	0.0697541499538163	0.0410318529140096	ACE	1
GO:0030506	MF	GO:0030506	ankyrin binding	2025-01-11	19/18432	0.0112837595513526	0.0697541499538163	0.0410318529140096	SLC8A1	1
GO:0050811	MF	GO:0050811	GABA receptor binding	2025-01-11	19/18432	0.0112837595513526	0.0697541499538163	0.0410318529140096	TRAK1	1
GO:0005537	MF	GO:0005537	mannose binding	2025-01-11	22/18432	0.0130547864328275	0.073977123119356	0.0435159547760918	BSG	1
GO:0051019	MF	GO:0051019	mitogen-activated protein kinase binding	2025-01-11	28/18432	0.016588191200457	0.0780956243729869	0.0459386025723452	ACE	1
GO:0051721	MF	GO:0051721	protein phosphatase 2A binding	2025-01-11	30/18432	0.0177634347159776	0.0780956243729869	0.0459386025723452	BCL2	1
GO:0071889	MF	GO:0071889	14-3-3 protein binding	2025-01-11	31/18432	0.0183505775383953	0.0780956243729869	0.0459386025723452	DDIT4	1
GO:0140828	MF	GO:0140828	metal cation:monoatomic cation antiporter activity	2025-01-11	32/18432	0.0189374012787937	0.0780956243729869	0.0459386025723452	SLC8A1	1
GO:0016248	MF	GO:0016248	channel inhibitor activity	2025-01-11	33/18432	0.0195239060932467	0.0780956243729869	0.0459386025723452	BCL2	1
GO:0001223	MF	GO:0001223	transcription coactivator binding	2025-01-11	40/18432	0.023620522963797	0.0882451453296594	0.0519089090174467	EPAS1	1
GO:0015298	MF	GO:0015298	solute:cation antiporter activity	2025-01-11	42/18432	0.0247881234741875	0.0882451453296594	0.0519089090174467	SLC8A1	1
GO:0004180	MF	GO:0004180	carboxypeptidase activity	2025-01-11	44/18432	0.0259544545087234	0.0882451453296594	0.0519089090174467	ACE	1
GO:0140297	MF	GO:0140297	DNA-binding transcription factor binding	2025-02-11	476/18432	0.0313712480403102	0.0955380934117602	0.056198878477506	BCL2/EPAS1	2
GO:0098632	MF	GO:0098632	cell-cell adhesion mediator activity	2025-01-11	54/18432	0.0317671109880614	0.0955380934117602	0.056198878477506	BSG	1
GO:0015267	MF	GO:0015267	channel activity	2025-02-11	494/18432	0.0335940143522959	0.0955380934117602	0.056198878477506	BCL2/CYBB	2
GO:0022803	MF	GO:0022803	passive transmembrane transporter activity	2025-02-11	495/18432	0.0337193270865036	0.0955380934117602	0.056198878477506	BCL2/CYBB	2
GO:0098631	MF	GO:0098631	cell adhesion mediator activity	2025-01-11	64/18432	0.0375482164649643	0.101217123906037	0.0595394846506098	BSG	1
GO:0008235	MF	GO:0008235	metalloexopeptidase activity	2025-01-11	66/18432	0.0387006650228964	0.101217123906037	0.0595394846506098	ACE	1
GO:0048029	MF	GO:0048029	monosaccharide binding	2025-01-11	72/18432	0.0421504877805903	0.103335184416713	0.0607854025980665	BSG	1
GO:0017022	MF	GO:0017022	myosin binding	2025-01-11	74/18432	0.0432979251556684	0.103335184416713	0.0607854025980665	TRAK1	1
GO:0001618	MF	GO:0001618	virus receptor activity	2025-01-11	77/18432	0.0450167383621696	0.103335184416713	0.0607854025980665	BSG	1
GO:0140272	MF	GO:0140272	exogenous protein binding	2025-01-11	78/18432	0.0455890519485499	0.103335184416713	0.0607854025980665	BSG	1
GO:0016651	MF	GO:0016651	oxidoreductase activity, acting on NAD(P)H	2025-01-11	87/18432	0.050725860681941	0.107792453949125	0.0634073258524262	CYBB	1
GO:0050660	MF	GO:0050660	flavin adenine dinucleotide binding	2025-01-11	87/18432	0.050725860681941	0.107792453949125	0.0634073258524262	CYBB	1
GO:0015297	MF	GO:0015297	antiporter activity	2025-01-11	93/18432	0.0541364229082492	0.108272845816498	0.0636899093038225	SLC8A1	1
GO:0140678	MF	GO:0140678	molecular function inhibitor activity	2025-01-11	93/18432	0.0541364229082492	0.108272845816498	0.0636899093038225	BCL2	1
GO:0008238	MF	GO:0008238	exopeptidase activity	2025-01-11	98/18432	0.0569700445456838	0.110684657974471	0.0651086223379243	ACE	1
GO:0001221	MF	GO:0001221	transcription coregulator binding	2025-01-11	109/18432	0.0631768666805566	0.119208003874936	0.0701223552205507	EPAS1	1
GO:0004222	MF	GO:0004222	metalloendopeptidase activity	2025-01-11	112/18432	0.0648631785790094	0.119208003874936	0.0701223552205507	ACE	1
GO:0009055	MF	GO:0009055	electron transfer activity	2025-01-11	122/18432	0.0704643083100208	0.126094025396879	0.0741729561158114	CYBB	1
GO:0044325	MF	GO:0044325	transmembrane transporter binding	2025-01-11	128/18432	0.0738103291261436	0.128694932835327	0.0757029016678396	SLC8A1	1
GO:0015085	MF	GO:0015085	calcium ion transmembrane transporter activity	2025-01-11	135/18432	0.0777001787281604	0.129102317584554	0.0759425397556198	SLC8A1	1
GO:0002020	MF	GO:0002020	protease binding	2025-01-11	139/18432	0.0799162760392843	0.129102317584554	0.0759425397556198	BCL2	1
GO:0020037	MF	GO:0020037	heme binding	2025-01-11	139/18432	0.0799162760392843	0.129102317584554	0.0759425397556198	CYBB	1
GO:0016247	MF	GO:0016247	channel regulator activity	2025-01-11	145/18432	0.0832313465888211	0.129102317584554	0.0759425397556198	BCL2	1
GO:0019903	MF	GO:0019903	protein phosphatase binding	2025-01-11	149/18432	0.0854353572250722	0.129102317584554	0.0759425397556198	BCL2	1
GO:0046906	MF	GO:0046906	tetrapyrrole binding	2025-01-11	149/18432	0.0854353572250722	0.129102317584554	0.0759425397556198	CYBB	1
GO:0015081	MF	GO:0015081	sodium ion transmembrane transporter activity	2025-01-11	156/18432	0.0892807881478698	0.131980295522938	0.0776354679546694	SLC8A1	1
GO:0008237	MF	GO:0008237	metallopeptidase activity	2025-01-11	184/18432	0.104515972725903	0.145818287758749	0.0857754633874995	ACE	1
GO:0008236	MF	GO:0008236	serine-type peptidase activity	2025-01-11	192/18432	0.108826121253046	0.145818287758749	0.0857754633874995	ACE	1
GO:0019902	MF	GO:0019902	phosphatase binding	2025-01-11	195/18432	0.110437558564193	0.145818287758749	0.0857754633874995	BCL2	1
GO:0017171	MF	GO:0017171	serine hydrolase activity	2025-01-11	196/18432	0.110974115391291	0.145818287758749	0.0857754633874995	ACE	1
GO:0005516	MF	GO:0005516	calmodulin binding	2025-01-11	200/18432	0.113117401857043	0.145818287758749	0.0857754633874995	SLC8A1	1
GO:0005244	MF	GO:0005244	voltage-gated ion channel activity	2025-01-11	201/18432	0.113652488988437	0.145818287758749	0.0857754633874995	CYBB	1
GO:0022832	MF	GO:0022832	voltage-gated channel activity	2025-01-11	201/18432	0.113652488988437	0.145818287758749	0.0857754633874995	CYBB	1
GO:0015291	MF	GO:0015291	secondary active transmembrane transporter activity	2025-01-11	246/18432	0.137429822513127	0.173059776498011	0.101799868528242	SLC8A1	1
GO:0030246	MF	GO:0030246	carbohydrate binding	2025-01-11	275/18432	0.152444170661919	0.186980254338544	0.109988384905026	BSG	1
GO:0022853	MF	GO:0022853	active ion transmembrane transporter activity	2025-01-11	278/18432	0.153983738867036	0.186980254338544	0.109988384905026	SLC8A1	1
GO:0001664	MF	GO:0001664	G protein-coupled receptor binding	2025-01-11	289/18432	0.159607096133128	0.190408465562328	0.112004979742546	ACE	1
GO:0031625	MF	GO:0031625	ubiquitin protein ligase binding	2025-01-11	299/18432	0.164689729843874	0.193084510851438	0.113579124030258	BCL2	1
GO:0044389	MF	GO:0044389	ubiquitin-like protein ligase binding	2025-01-11	318/18432	0.174269817808554	0.200853349338672	0.118149029022748	BCL2	1
GO:0045296	MF	GO:0045296	cadherin binding	2025-01-11	333/18432	0.181762369111054	0.205997351659194	0.121174912740703	BSG	1
GO:0022836	MF	GO:0022836	gated channel activity	2025-01-11	341/18432	0.1857330745944	0.207046706105233	0.121792180061902	CYBB	1
GO:0061629	MF	GO:0061629	RNA polymerase II-specific DNA-binding transcription factor binding	2025-01-11	350/18432	0.190179174031911	0.208583610228548	0.12269624131091	EPAS1	1
GO:0022804	MF	GO:0022804	active transmembrane transporter activity	2025-01-11	417/18432	0.22259049998727	0.240256412684672	0.141327301579219	SLC8A1	1
GO:0004175	MF	GO:0004175	endopeptidase activity	2025-01-11	426/18432	0.226853216747455	0.241031542794171	0.141783260467159	ACE	1
GO:0046873	MF	GO:0046873	metal ion transmembrane transporter activity	2025-01-11	436/18432	0.231564639215578	0.242252237948605	0.142501316440356	SLC8A1	1
GO:0001228	MF	GO:0001228	DNA-binding transcription activator activity, RNA polymerase II-specific	2025-01-11	468/18432	0.246466339735448	0.252016587816011	0.148245051656477	EPAS1	1
GO:0001216	MF	GO:0001216	DNA-binding transcription activator activity	2025-01-11	472/18432	0.248310461524599	0.252016587816011	0.148245051656477	EPAS1	1
GO:0060090	MF	GO:0060090	molecular adaptor activity	2025-01-11	492/18432	0.257469678470249	0.257469678470249	0.151452752041323	BCL2	1
