# Supplementary material for: Identification of hypoxia- and mitochondria-related genes associated with recurrent spontaneous abortion: an integrative bioinformatics analysis and preliminary validation
Source: PeerJ journal article supplement (doi:10.7717/peerj.20467), 2025-12-19
Supplement: Translation_SupplementaryTable7_StaffER.docx [file Translation_SupplementaryTable7_StaffER.docx]

Translations for non-English text in Supplementary Table 7

Original (Chinese): Supplementary table x - 11个候选基因

English translation: Supplementary Table 7 - List of 11 candidate genes
